# Supplementary material for: Combining stem cell rejuvenation and senescence targeting to synergistically extend lifespan
Source: Aging (Albany NY). 2022 Oct 25;14(20):8270–91. doi: 10.18632/aging.204347 (PMC9648810; doi:10.18632/aging.204347)
Supplement: Supplementary Table 1 [file aging-14-204347-s002.xlsx]

## Sheet: LRT
Supplementary Table 1. Differential expression analysis results for ubiquitous expression model.
gene_id	pvalue	padj	gene_biotype	external_gene_name	Cluster
FBgn0000003	0.593278	0.903496	ncRNA	7SLRNA:CR32864	NA
FBgn0000008	2.09242e-07	1.03693e-05	protein_coding	a	1
FBgn0000014	0.270925	0.666326	protein_coding	abd-A	NA
FBgn0000015	0.747063	0.959663	protein_coding	Abd-B	NA
FBgn0000017	0.356464	0.750379	protein_coding	Abl	NA
FBgn0000018	0.75575	0.9621	protein_coding	abo	NA
FBgn0000024	0.00865876	0.0738929	protein_coding	Ace	2
FBgn0000032	0.189464	0.559602	protein_coding	Acph-1	NA
FBgn0000042	0.486313	0.849755	protein_coding	Act5C	NA
FBgn0000043	1.10485e-06	4.3533e-05	protein_coding	Act42A	1
FBgn0000044	0.865876	0.988254	protein_coding	Act57B	NA
FBgn0000045	0.436801	0.817641	protein_coding	Act79B	NA
FBgn0000046	0.889979	0.993343	protein_coding	Act87E	NA
FBgn0000052	0.386099	0.774187	protein_coding	Pfas	NA
FBgn0000053	0.000199364	0.00379542	protein_coding	Gart	3
FBgn0000055	0.105037	0.399616	protein_coding	Adh	NA
FBgn0000056	0.0105195	0.0845445	protein_coding	Adhr	4
FBgn0000057	0.0880606	0.36492	protein_coding	adp	NA
FBgn0000063	0.282635	0.676612	protein_coding	Mps1	NA
FBgn0000064	0.217392	0.598341	protein_coding	Ald1	NA
FBgn0000075	0.444152	0.823161	protein_coding	amd	NA
FBgn0000077	0.932082	0.999487	protein_coding	amx	NA
FBgn0000078	1.56761e-05	0.000440671	protein_coding	Amy-d	2
FBgn0000079	0.000482441	0.00792853	protein_coding	Amy-p	2
FBgn0000083	0.182698	0.548452	protein_coding	AnxB9	NA
FBgn0000084	1.25088e-06	4.82969e-05	protein_coding	AnxB10	1
FBgn0000092	0.254199	0.64499	protein_coding	dyw	NA
FBgn0000097	0.400747	0.789181	protein_coding	aop	NA
FBgn0000100	0.260554	0.653867	protein_coding	RpLP0	NA
FBgn0000108	0.573091	0.894931	protein_coding	Appl	NA
FBgn0000109	0.349498	0.744697	protein_coding	Aprt	NA
FBgn0000114	0.684753	0.944401	protein_coding	bru1	NA
FBgn0000115	0.433308	0.815092	protein_coding	Arl1	NA
FBgn0000116	0.137913	0.470838	protein_coding	Argk	NA
FBgn0000117	0.578355	0.896525	protein_coding	arm	NA
FBgn0000119	0.466952	0.837082	protein_coding	arr	NA
FBgn0000120	4.47828e-12	4.94875e-10	protein_coding	Arr1	5
FBgn0000139	0.0357979	0.20498	protein_coding	ash2	NA
FBgn0000140	0.000253009	0.00460341	protein_coding	asp	1
FBgn0000146	0.200617	0.57817	protein_coding	aub	NA
FBgn0000147	0.0106026	0.0847436	protein_coding	aurA	1
FBgn0000150	0.960841	0.999487	protein_coding	awd	NA
FBgn0000152	0.551463	0.886587	protein_coding	Axs	NA
FBgn0000163	0.82479	0.979092	protein_coding	baz	NA
FBgn0000173	0.950605	0.999487	protein_coding	ben	NA
FBgn0000180	0.000178066	0.00350045	protein_coding	bib	1
FBgn0000181	0.446184	0.824701	protein_coding	bic	NA
FBgn0000183	0.557504	0.888715	protein_coding	BicD	NA
FBgn0000212	0.203633	0.581618	protein_coding	brm	NA
FBgn0000221	0.901853	0.994611	protein_coding	brn	NA
FBgn0000228	0.603694	0.907492	protein_coding	Bsg25D	NA
FBgn0000229	0.17085	0.53111	protein_coding	bsk	NA
FBgn0000239	0.879424	0.990576	protein_coding	bur	NA
FBgn0000241	0.0701464	0.31901	protein_coding	bw	NA
FBgn0000244	0.778674	0.968677	protein_coding	by	NA
FBgn0000246	0.495743	0.85316	protein_coding	c(3)G	NA
FBgn0000247	0.82102	0.979092	protein_coding	ca	NA
FBgn0000250	0.713699	0.950488	protein_coding	cact	NA
FBgn0000251	0.0411495	0.224397	protein_coding	cad	NA
FBgn0000253	0.802105	0.975513	protein_coding	Cam	NA
FBgn0000256	0.555038	0.888144	protein_coding	capu	NA
FBgn0000257	0.607051	0.908932	protein_coding	car	NA
FBgn0000259	0.755996	0.962124	protein_coding	CkIIbeta	NA
FBgn0000261	0.000848977	0.0126435	protein_coding	Cat	6
FBgn0000273	0.218131	0.599861	protein_coding	Pka-C1	NA
FBgn0000276	0.000931606	0.0134854	protein_coding	CecA1	7
FBgn0000279	0.170527	0.530738	protein_coding	CecC	NA
FBgn0000283	0.779038	0.968677	protein_coding	Cp190	NA
FBgn0000286	0.364561	0.756179	protein_coding	Cf2	NA
FBgn0000289	0.789293	0.971691	protein_coding	cg	NA
FBgn0000299	0.37916	0.767904	protein_coding	Col4a1	NA
FBgn0000307	0.63102	0.920022	protein_coding	chif	NA
FBgn0000308	0.409954	0.798058	protein_coding	chic	NA
FBgn0000316	0.411375	0.799304	protein_coding	cin	NA
FBgn0000317	0.193852	0.5682	protein_coding	ck	NA
FBgn0000318	0.809605	0.976198	protein_coding	cl	NA
FBgn0000319	0.867968	0.988585	protein_coding	Chc	NA
FBgn0000326	0.222557	0.604664	protein_coding	clt	NA
FBgn0000330	0.951846	0.999487	protein_coding	cm	NA
FBgn0000339	0.332595	0.731985	protein_coding	cni	NA
FBgn0000346	0.933355	0.999487	protein_coding	comt	NA
FBgn0000352	0.974921	0.999487	protein_coding	cos	NA
FBgn0000355	0.870186	0.989055	protein_coding	Cp15	NA
FBgn0000357	4.00137e-05	0.000996612	protein_coding	Cp18	3
FBgn0000359	0.662726	0.933682	protein_coding	Cp36	NA
FBgn0000370	0.268156	0.661886	protein_coding	crc	NA
FBgn0000376	0.382127	0.771022	protein_coding	crm	NA
FBgn0000377	0.901307	0.994611	protein_coding	crn	NA
FBgn0000382	0.50662	0.861147	protein_coding	csw	NA
FBgn0000384	0.943896	0.999487	protein_coding	cta	NA
FBgn0000392	0.114671	0.421265	protein_coding	cup	NA
FBgn0000394	0.211668	0.59238	protein_coding	cv	NA
FBgn0000395	0.0188064	0.128687	protein_coding	cv-2	NA
FBgn0000404	5.07867e-07	2.26531e-05	protein_coding	CycA	1
FBgn0000405	0.000819887	0.012297	protein_coding	CycB	1
FBgn0000406	0.17427	0.535796	protein_coding	Cyt-b5-r	NA
FBgn0000412	0.907388	0.996711	protein_coding	D1	NA
FBgn0000414	0.235551	0.621456	protein_coding	Dab	NA
FBgn0000416	0.240004	0.625709	protein_coding	Sap-r	NA
FBgn0000422	0.0061054	0.0576029	protein_coding	Ddc	3
FBgn0000426	0.841993	0.983561	protein_coding	SmF	NA
FBgn0000427	0.00581531	0.0555197	protein_coding	2001-12-01	6
FBgn0000442	0.170402	0.530519	protein_coding	Pkg21D	NA
FBgn0000447	0.604323	0.907761	protein_coding	Dhod	NA
FBgn0000448	0.60993	0.909268	protein_coding	Hr3	NA
FBgn0000451	0.129228	0.452934	protein_coding	ect	NA
FBgn0000454	0.357839	0.750822	protein_coding	Dip-B	NA
FBgn0000455	0.0761018	0.334017	protein_coding	Dip-C	NA
FBgn0000459	0.841677	0.983457	protein_coding	disco	NA
FBgn0000463	0.000438882	0.00732537	protein_coding	Dl	1
FBgn0000464	0.0929782	0.374641	protein_coding	Lar	NA
FBgn0000473	0.0131263	0.0987453	protein_coding	Cyp6a2	6
FBgn0000477	0.00996197	0.0817885	protein_coding	DNaseII	2
FBgn0000479	0.233192	0.618798	protein_coding	dnc	NA
FBgn0000482	0.969041	0.999487	protein_coding	dor	NA
FBgn0000489	0.499988	0.856232	protein_coding	Pka-C3	NA
FBgn0000490	0.0395562	0.218937	protein_coding	dpp	NA
FBgn0000499	0.961427	0.999487	protein_coding	dsh	NA
FBgn0000504	0.742364	0.957812	protein_coding	dsx	NA
FBgn0000520	0.997163	0.999487	protein_coding	dwg	NA
FBgn0000524	0.832943	0.981776	protein_coding	dx	NA
FBgn0000533	0.153143	0.499852	protein_coding	ea	NA
FBgn0000536	0.142446	0.4799	protein_coding	eas	NA
FBgn0000541	0.378201	0.767218	protein_coding	E(bx)	NA
FBgn0000542	0.889524	0.993343	protein_coding	ec	NA
FBgn0000543	0.272376	0.668187	protein_coding	ecd	NA
FBgn0000546	0.691805	0.945803	protein_coding	EcR	NA
FBgn0000547	0.700174	0.947083	protein_coding	ed	NA
FBgn0000557	0.000921463	0.0134081	protein_coding	eEF1alpha2	6
FBgn0000559	0.00177216	0.0225431	protein_coding	eEF2	4
FBgn0000562	0.887634	0.99334	protein_coding	egl	NA
FBgn0000565	0.0373946	0.211105	protein_coding	MsrA	NA
FBgn0000566	0.019751	0.132881	protein_coding	Eip55E	NA
FBgn0000567	0.00794826	0.0695743	protein_coding	Eip74EF	1
FBgn0000568	0.656837	0.932079	protein_coding	Eip75B	NA
FBgn0000575	0.878196	0.990576	protein_coding	emc	NA
FBgn0000578	0.029393	0.176726	protein_coding	ena	NA
FBgn0000579	0.122752	0.43839	protein_coding	Eno	NA
FBgn0000581	0.323147	0.723195	protein_coding	E(Pc)	NA
FBgn0000588	0.157237	0.506656	protein_coding	esc	NA
FBgn0000592	0.120219	0.433526	protein_coding	Est-6	NA
FBgn0000611	0.718479	0.951178	protein_coding	exd	NA
FBgn0000615	0.3086	0.70758	protein_coding	exu	NA
FBgn0000617	0.934671	0.999487	protein_coding	e(y)1	NA
FBgn0000618	0.844268	0.983966	protein_coding	e(y)2	NA
FBgn0000629	0.491567	0.851426	protein_coding	E(z)	NA
FBgn0000633	0.30198	0.701096	protein_coding	CG17716	NA
FBgn0000635	0.0142323	0.10445	protein_coding	Fas2	NA
FBgn0000636	0.348774	0.74411	protein_coding	Fas3	NA
FBgn0000640	0.434728	0.816422	protein_coding	Fbp2	NA
FBgn0000644	0.695159	0.946849	protein_coding	Fcp3C	NA
FBgn0000659	0.140533	0.476441	protein_coding	fkh	NA
FBgn0000662	0.926639	0.999487	protein_coding	fl(2)d	NA
FBgn0000667	0.891157	0.993343	protein_coding	Actn	NA
FBgn0000709	0.949062	0.999487	protein_coding	fliI	NA
FBgn0000711	0.768319	0.965318	protein_coding	flw	NA
FBgn0000719	0.142942	0.480506	protein_coding	fog	NA
FBgn0000721	0.920657	0.999487	protein_coding	for	NA
FBgn0000723	0.413361	0.800414	protein_coding	FER	NA
FBgn0000810	0.283369	0.676612	protein_coding	fs(1)K10	NA
FBgn0000927	0.0213872	0.141902	protein_coding	fs(1)Ya	NA
FBgn0000996	0.742246	0.957812	protein_coding	dup	NA
FBgn0001075	0.3576	0.750674	protein_coding	ft	NA
FBgn0001078	0.0949669	0.378427	protein_coding	ftz-f1	NA
FBgn0001079	0.645642	0.926254	protein_coding	fu	NA
FBgn0001084	0.93706	0.999487	protein_coding	fy	NA
FBgn0001085	0.487484	0.850047	protein_coding	fz	NA
FBgn0001086	0.00410967	0.04253	protein_coding	fzy	1
FBgn0001087	0.525939	0.87279	protein_coding	g	NA
FBgn0001089	1.99402e-05	0.000546169	protein_coding	Gal	6
FBgn0001090	0.886464	0.993071	protein_coding	bnb	NA
FBgn0001091	0.674359	0.940152	protein_coding	Gapdh1	NA
FBgn0001092	0.53033	0.874094	protein_coding	Gapdh2	NA
FBgn0001098	0.0128688	0.0975088	protein_coding	Gdh	6
FBgn0001099	0.372991	0.764042	protein_coding	gdl	NA
FBgn0001104	0.0541122	0.269114	protein_coding	Galphai	NA
FBgn0001105	0.242138	0.628825	protein_coding	Gbeta13F	NA
FBgn0001108	0.375419	0.766223	protein_coding	DCTN1-p150	NA
FBgn0001112	0.0154185	0.111036	protein_coding	Gld	NA
FBgn0001114	0.0469084	0.245764	protein_coding	Glt	NA
FBgn0001122	0.377838	0.767167	protein_coding	Galphao	NA
FBgn0001123	0.806501	0.976038	protein_coding	Galphas	NA
FBgn0001124	1.39566e-07	7.29232e-06	protein_coding	Got1	7
FBgn0001125	0.472814	0.840709	protein_coding	Got2	NA
FBgn0001128	0.124672	0.443104	protein_coding	Gpdh1	NA
FBgn0001133	0.591371	0.903051	protein_coding	grau	NA
FBgn0001134	0.292363	0.687569	protein_coding	Grd	NA
FBgn0001137	0.399518	0.788583	protein_coding	grk	NA
FBgn0001139	0.826609	0.979092	protein_coding	gro	NA
FBgn0001142	3.57969e-09	2.79798e-07	protein_coding	Gs1	4
FBgn0001145	0.000190989	0.00366764	protein_coding	Gs2	5
FBgn0001149	0.000210468	0.00399101	protein_coding	GstD1	2
FBgn0001168	0.838911	0.982872	protein_coding	h	NA
FBgn0001169	0.974785	0.999487	protein_coding	H	NA
FBgn0001170	0.0718937	0.323438	protein_coding	H2.0	NA
FBgn0001179	0.121574	0.436285	protein_coding	hay	NA
FBgn0001180	0.249034	0.639992	protein_coding	hb	NA
FBgn0001185	0.376533	0.766459	protein_coding	her	NA
FBgn0001186	0.435438	0.816692	protein_coding	Hex-A	NA
FBgn0001187	0.0401568	0.221183	protein_coding	Hex-C	NA
FBgn0001189	0.256764	0.648247	protein_coding	hfw	NA
FBgn0001197	0.0209308	0.139355	protein_coding	His2Av	NA
FBgn0001202	0.769526	0.9657	protein_coding	hook	NA
FBgn0001206	0.542956	0.880738	protein_coding	Hmr	NA
FBgn0001208	0.0249418	0.157239	protein_coding	Hn	NA
FBgn0001215	0.595548	0.904496	protein_coding	Hrb98DE	NA
FBgn0001216	0.593872	0.903971	protein_coding	Hsc70-1	NA
FBgn0001217	0.165381	0.521474	protein_coding	Hsc70-2	NA
FBgn0001218	0.368634	0.759222	protein_coding	Hsc70-3	NA
FBgn0001220	0.653415	0.930519	protein_coding	Hsc70-5	NA
FBgn0001222	0.542304	0.880397	protein_coding	Hsf	NA
FBgn0001223	0.781752	0.969037	protein_coding	Hsp22	NA
FBgn0001224	0.537474	0.878428	protein_coding	Hsp23	NA
FBgn0001225	0.867266	0.988254	protein_coding	Hsp26	NA
FBgn0001226	0.54515	0.881773	protein_coding	Hsp27	NA
FBgn0001229	0.82631	0.979092	protein_coding	Hsp67Bc	NA
FBgn0001230	0.565375	0.893188	protein_coding	Hsp68	NA
FBgn0001233	0.0883099	0.365481	protein_coding	Hsp83	NA
FBgn0001234	0.590726	0.903051	ncRNA	lncRNA:Hsromega	NA
FBgn0001235	0.284965	0.677964	protein_coding	hth	NA
FBgn0001247	0.735624	0.954196	protein_coding	Ide	NA
FBgn0001248	0.0127246	0.0967834	protein_coding	Idh	6
FBgn0001250	0.0609569	0.289545	protein_coding	if	NA
FBgn0001255	0.901998	0.994611	protein_coding	ImpE3	NA
FBgn0001257	0.0114541	0.0898937	protein_coding	ImpL2	1
FBgn0001258	0.461008	0.833328	protein_coding	Ldh	NA
FBgn0001259	0.651713	0.930161	protein_coding	in	NA
FBgn0001276	0.597966	0.906615	protein_coding	ix	NA
FBgn0001280	0.778366	0.968677	protein_coding	janA	NA
FBgn0001285	6.2294e-05	0.00145181	protein_coding	Jon44E	3
FBgn0001291	0.23138	0.616164	protein_coding	Jra	NA
FBgn0001296	0.0398105	0.220176	protein_coding	kar	NA
FBgn0001297	0.392985	0.780616	protein_coding	kay	NA
FBgn0001301	0.0627162	0.295027	protein_coding	kel	NA
FBgn0001308	0.559629	0.889963	protein_coding	Khc	NA
FBgn0001316	0.801875	0.975513	protein_coding	klar	NA
FBgn0001320	0.0157853	0.113195	protein_coding	kni	NA
FBgn0001321	0.697634	0.947083	protein_coding	knk	NA
FBgn0001323	0.361194	0.753732	protein_coding	knrl	NA
FBgn0001324	0.94133	0.999487	protein_coding	kto	NA
FBgn0001330	0.0117136	0.0912601	protein_coding	kz	6
FBgn0001341	0.324345	0.724839	protein_coding	Mybbp1A	NA
FBgn0001404	0.617504	0.914321	protein_coding	egh	NA
FBgn0001491	0.768178	0.965318	protein_coding	l(1)10Bb	NA
FBgn0001565	0.736124	0.954196	protein_coding	Hlc	NA
FBgn0001612	4.65247e-06	0.000152139	protein_coding	Grip91	6
FBgn0001624	0.271283	0.666867	protein_coding	dlg1	NA
FBgn0001941	0.706267	0.948613	protein_coding	ifc	NA
FBgn0001942	9.36403e-05	0.00204604	protein_coding	eIF4A	4
FBgn0001961	0.0287709	0.174183	protein_coding	Arpc1	NA
FBgn0001965	0.90568	0.9961	protein_coding	Sos	NA
FBgn0001970	0.571128	0.894931	protein_coding	Pgant35A	NA
FBgn0001977	0.924197	0.999487	protein_coding	CIAPIN1	NA
FBgn0001978	0.836474	0.982374	protein_coding	stc	NA
FBgn0001981	0.0571029	0.277968	protein_coding	esg	NA
FBgn0001986	0.228593	0.61358	protein_coding	Mtr4	NA
FBgn0001987	0.324052	0.724621	protein_coding	Gli	NA
FBgn0001989	0.929565	0.999487	protein_coding	ND-B17	NA
FBgn0001990	0.610044	0.909268	protein_coding	wek	NA
FBgn0001991	0.371457	0.76344	protein_coding	Ca-alpha1D	NA
FBgn0001992	0.230532	0.615307	protein_coding	Cyp303a1	NA
FBgn0001994	0.551373	0.886587	protein_coding	crp	NA
FBgn0001995	0.732276	0.953919	protein_coding	mRpL4	NA
FBgn0002021	0.851422	0.985686	protein_coding	l(2)37Bb	NA
FBgn0002022	0.510618	0.864123	protein_coding	Catsup	NA
FBgn0002023	0.235869	0.621542	protein_coding	Lim3	NA
FBgn0002031	0.529449	0.873412	protein_coding	l(2)37Cc	NA
FBgn0002036	0.0241687	0.154699	protein_coding	CG10561	NA
FBgn0002044	0.337886	0.735798	protein_coding	swm	NA
FBgn0002069	0.825507	0.979092	protein_coding	AspRS	NA
FBgn0002121	0.100889	0.390634	protein_coding	l(2)gl	NA
FBgn0002174	0.000171133	0.00338533	protein_coding	CG5504	7
FBgn0002183	0.313268	0.712594	protein_coding	dre4	NA
FBgn0002283	0.383176	0.771291	protein_coding	l(3)73Ah	NA
FBgn0002284	0.354303	0.748501	protein_coding	Prosbeta6	NA
FBgn0002306	0.872568	0.989487	protein_coding	sas	NA
FBgn0002354	0.629764	0.919282	protein_coding	l(3)87Df	NA
FBgn0002413	0.406268	0.794683	protein_coding	dco	NA
FBgn0002431	0.879772	0.990576	protein_coding	hyd	NA
FBgn0002441	0.263976	0.657297	protein_coding	l(3)mbt	NA
FBgn0002466	6.52384e-07	2.75089e-05	protein_coding	sti	1
FBgn0002521	0.943491	0.999487	protein_coding	pho	NA
FBgn0002522	0.024074	0.154298	protein_coding	lab	NA
FBgn0002524	0.364652	0.756205	protein_coding	lace	NA
FBgn0002525	0.851305	0.985686	protein_coding	Lam	NA
FBgn0002526	0.00697385	0.0631324	protein_coding	LanA	1
FBgn0002531	1.90616e-44	2.61798e-41	protein_coding	Lcp1	3
FBgn0002542	0.58783	0.901769	protein_coding	lds	NA
FBgn0002543	0.000776937	0.0117445	protein_coding	robo2	7
FBgn0002552	0.661514	0.933682	protein_coding	lin	NA
FBgn0002564	6.44478e-05	0.00147524	protein_coding	Lsp1gamma	3
FBgn0002565	0.000338069	0.00588804	protein_coding	Lsp2	6
FBgn0002566	0.984096	0.999487	protein_coding	lt	NA
FBgn0002567	0.00866514	0.0738929	protein_coding	Rab32	4
FBgn0002569	0.133768	0.461775	protein_coding	Mal-A2	NA
FBgn0002570	0.0306573	0.182501	protein_coding	Mal-A1	NA
FBgn0002571	0.0139284	0.102479	protein_coding	Mal-A3	NA
FBgn0002578	0.0905952	0.370897	protein_coding	Kaz-m1	NA
FBgn0002579	0.250347	0.641824	protein_coding	RpL36	NA
FBgn0002590	0.0305796	0.182265	protein_coding	RpS5a	NA
FBgn0002593	0.0977901	0.38358	protein_coding	RpLP1	NA
FBgn0002609	3.31459e-06	0.000117589	protein_coding	E(spl)m3-HLH	1
FBgn0002622	0.353655	0.748249	protein_coding	RpS3	NA
FBgn0002626	0.191007	0.562606	protein_coding	RpL32	NA
FBgn0002632	0.524157	0.871107	protein_coding	E(spl)m6-BFM	NA
FBgn0002638	0.113654	0.419488	protein_coding	Rcc1	NA
FBgn0002641	0.576809	0.895653	protein_coding	mal	NA
FBgn0002643	0.523474	0.871107	protein_coding	mam	NA
FBgn0002645	0.000353778	0.00608448	protein_coding	Map205	1
FBgn0002673	0.36711	0.758367	protein_coding	twe	NA
FBgn0002707	0.662654	0.933682	protein_coding	mei-9	NA
FBgn0002709	0.93828	0.999487	protein_coding	mei-218	NA
FBgn0002715	0.70612	0.948613	protein_coding	mei-S332	NA
FBgn0002716	0.522554	0.871107	protein_coding	mei-W68	NA
FBgn0002719	0.000216399	0.0040634	protein_coding	Men	2
FBgn0002723	0.85934	0.985686	protein_coding	Met	NA
FBgn0002732	5.76709e-06	0.000181786	protein_coding	E(spl)malpha-BFM	7
FBgn0002733	9.86043e-05	0.00213509	protein_coding	E(spl)mbeta-HLH	7
FBgn0002736	0.178202	0.541647	protein_coding	mago	NA
FBgn0002772	0.184917	0.551596	protein_coding	Mlc1	NA
FBgn0002773	0.417634	0.803669	protein_coding	Mlc2	NA
FBgn0002774	0.784313	0.969983	protein_coding	mle	NA
FBgn0002775	0.749159	0.960301	protein_coding	msl-3	NA
FBgn0002778	0.641907	0.924033	protein_coding	mnd	NA
FBgn0002780	0.620132	0.914952	protein_coding	mod	NA
FBgn0002781	0.795063	0.972874	protein_coding	mod(mdg4)	NA
FBgn0002783	0.701247	0.947083	protein_coding	mor	NA
FBgn0002787	0.626897	0.918253	protein_coding	Rpn8	NA
FBgn0002789	0.543287	0.88077	protein_coding	Mp20	NA
FBgn0002791	0.995903	0.999487	protein_coding	mr	NA
FBgn0002868	0.00251149	0.0295361	protein_coding	MtnA	1
FBgn0002869	0.0152616	0.110237	protein_coding	MtnB	NA
FBgn0002872	0.618194	0.914325	protein_coding	mu2	NA
FBgn0002873	0.00270407	0.0313527	protein_coding	mud	1
FBgn0002878	0.80366	0.97587	protein_coding	mus101	NA
FBgn0002887	0.956403	0.999487	protein_coding	mus201	NA
FBgn0002891	0.377275	0.766792	protein_coding	DNApol-zeta	NA
FBgn0002899	0.362067	0.754588	protein_coding	mus301	NA
FBgn0002901	0.220006	0.60114	protein_coding	mus304	NA
FBgn0002905	0.672623	0.93951	protein_coding	DNApol-theta	NA
FBgn0002906	0.743613	0.95871	protein_coding	Blm	NA
FBgn0002909	0.413783	0.800747	protein_coding	mus312	NA
FBgn0002914	0.518415	0.868715	protein_coding	Myb	NA
FBgn0002917	0.000480012	0.00790792	protein_coding	na	4
FBgn0002921	0.079479	0.342344	protein_coding	Atpalpha	NA
FBgn0002924	0.00313302	0.0349348	protein_coding	ncd	1
FBgn0002930	0.359977	0.752639	protein_coding	nec	NA
FBgn0002931	0.478599	0.843647	protein_coding	net	NA
FBgn0002932	0.464444	0.835234	protein_coding	neur	NA
FBgn0002939	0.0188376	0.128809	protein_coding	ninaD	NA
FBgn0002945	0.360114	0.752639	protein_coding	nkd	NA
FBgn0002948	0.76424	0.964681	protein_coding	nod	NA
FBgn0002973	0.888319	0.993343	protein_coding	numb	NA
FBgn0002985	0.00400486	0.0418054	protein_coding	odd	2
FBgn0002989	0.753992	0.961517	protein_coding	okr	NA
FBgn0003002	0.374754	0.765471	protein_coding	opa	NA
FBgn0003008	0.338308	0.736025	protein_coding	or	NA
FBgn0003015	0.396778	0.785225	protein_coding	osk	NA
FBgn0003016	0.128939	0.452086	protein_coding	osp	NA
FBgn0003023	1.53886e-07	7.91155e-06	protein_coding	otu	6
FBgn0003028	0.69479	0.946849	protein_coding	ovo	NA
FBgn0003041	0.0308863	0.18341	protein_coding	pbl	NA
FBgn0003042	0.744138	0.959	protein_coding	Pc	NA
FBgn0003044	0.977169	0.999487	protein_coding	Pcl	NA
FBgn0003046	8.08278e-32	5.18052e-29	protein_coding	Pcp	3
FBgn0003048	0.73003	0.952954	protein_coding	pcx	NA
FBgn0003053	0.474906	0.842233	protein_coding	peb	NA
FBgn0003062	0.308997	0.708152	protein_coding	Fib	NA
FBgn0003067	0.382955	0.771291	protein_coding	Pepck1	NA
FBgn0003068	0.00813881	0.0707473	protein_coding	per	3
FBgn0003071	0.00955734	0.0793474	protein_coding	Pfk	4
FBgn0003074	0.17138	0.531753	protein_coding	Pgi	NA
FBgn0003076	0.00414087	0.0428068	protein_coding	Pgm1	5
FBgn0003079	0.0630924	0.296466	protein_coding	Raf	NA
FBgn0003082	1.3347e-11	1.41009e-09	protein_coding	phr	7
FBgn0003087	0.948333	0.999487	protein_coding	pim	NA
FBgn0003090	0.364817	0.756384	protein_coding	pk	NA
FBgn0003091	0.0382378	0.214089	protein_coding	Pkc53E	NA
FBgn0003093	0.963807	0.999487	protein_coding	Pkc98E	NA
FBgn0003116	0.181204	0.547141	protein_coding	pn	NA
FBgn0003118	0.0744387	0.330404	protein_coding	pnt	NA
FBgn0003124	0.000542346	0.00868554	protein_coding	polo	1
FBgn0003129	0.0555098	0.273257	protein_coding	Poxm	NA
FBgn0003130	0.530722	0.874256	protein_coding	Poxn	NA
FBgn0003134	0.467981	0.837235	protein_coding	Pp1alpha-96A	NA
FBgn0003137	0.740996	0.956924	protein_coding	Ppn	NA
FBgn0003139	0.803953	0.97587	protein_coding	PpV	NA
FBgn0003141	0.182279	0.548452	protein_coding	pr	NA
FBgn0003149	0.346555	0.742541	protein_coding	Prm	NA
FBgn0003159	0.599374	0.906919	protein_coding	CG2841	NA
FBgn0003162	0.00118968	0.0163394	protein_coding	Pu	6
FBgn0003165	0.738405	0.955335	protein_coding	pum	NA
FBgn0003169	0.847366	0.985072	protein_coding	put	NA
FBgn0003175	0.312419	0.712326	protein_coding	px	NA
FBgn0003187	0.450869	0.827187	protein_coding	qua	NA
FBgn0003189	0.0191328	0.130363	protein_coding	r	NA
FBgn0003204	0.795077	0.972874	protein_coding	ras	NA
FBgn0003205	0.34937	0.744697	protein_coding	Ras85D	NA
FBgn0003206	0.364198	0.755752	protein_coding	Ras64B	NA
FBgn0003209	0.342	0.738109	protein_coding	raw	NA
FBgn0003210	0.258563	0.651252	protein_coding	rb	NA
FBgn0003218	0.902769	0.99507	protein_coding	rdgB	NA
FBgn0003227	0.0838646	0.353784	protein_coding	rec	NA
FBgn0003231	0.309177	0.708179	protein_coding	ref(2)P	NA
FBgn0003256	0.687803	0.944401	protein_coding	rl	NA
FBgn0003257	0.596041	0.904838	protein_coding	r-l	NA
FBgn0003261	0.0548545	0.270864	protein_coding	Rm62	NA
FBgn0003268	0.00630936	0.0586636	protein_coding	rod	1
FBgn0003274	0.640047	0.923242	protein_coding	RpLP2	NA
FBgn0003275	0.91288	0.997034	protein_coding	RpII18	NA
FBgn0003277	0.4739	0.84138	protein_coding	RpII215	NA
FBgn0003278	0.147746	0.488793	protein_coding	RpI135	NA
FBgn0003279	0.0464857	0.244082	protein_coding	RpL4	NA
FBgn0003285	0.642229	0.924033	protein_coding	rst	NA
FBgn0003301	0.00861008	0.0738223	protein_coding	rut	5
FBgn0003302	0.996123	0.999487	protein_coding	rux	NA
FBgn0003308	0.0336921	0.195012	protein_coding	ry	NA
FBgn0003310	0.155135	0.503635	protein_coding	S	NA
FBgn0003317	0.336214	0.735098	protein_coding	sax	NA
FBgn0003321	0.335178	0.734401	protein_coding	sbr	NA
FBgn0003328	0.0138281	0.102107	NA	NA	NA
FBgn0003330	0.848367	0.985167	protein_coding	Sce	NA
FBgn0003334	0.923723	0.999487	protein_coding	Scm	NA
FBgn0003345	0.154357	0.50213	protein_coding	sd	NA
FBgn0003346	0.561758	0.891002	protein_coding	RanGAP	NA
FBgn0003353	0.277464	0.672742	protein_coding	sei	NA
FBgn0003358	3.29725e-05	0.000854442	protein_coding	Jon99Ci	2
FBgn0003360	0.745634	0.959629	protein_coding	sesB	NA
FBgn0003366	0.249745	0.641134	protein_coding	sev	NA
FBgn0003371	0.856926	0.985686	protein_coding	sgg	NA
FBgn0003380	0.64373	0.924658	protein_coding	Sh	NA
FBgn0003382	0.479733	0.843735	protein_coding	sha	NA
FBgn0003386	0.0476356	0.247896	protein_coding	Shaw	NA
FBgn0003388	0.000308829	0.00542795	protein_coding	shd	6
FBgn0003390	2.06353e-05	0.000560417	protein_coding	shf	3
FBgn0003391	0.100174	0.388649	protein_coding	shg	NA
FBgn0003392	0.725744	0.952793	protein_coding	shi	NA
FBgn0003396	0.78984	0.971691	protein_coding	shn	NA
FBgn0003401	0.0345145	0.198577	protein_coding	shu	NA
FBgn0003410	0.540501	0.879069	protein_coding	sina	NA
FBgn0003411	0.301646	0.700559	protein_coding	sisA	NA
FBgn0003415	0.404346	0.792858	protein_coding	skd	NA
FBgn0003416	0.833049	0.981776	protein_coding	sl	NA
FBgn0003423	0.500879	0.856567	protein_coding	slgA	NA
FBgn0003429	0.00480273	0.0481475	protein_coding	slo	6
FBgn0003435	0.237771	0.623103	protein_coding	sm	NA
FBgn0003444	0.917914	0.998622	protein_coding	smo	NA
FBgn0003447	0.00423099	0.0435511	protein_coding	sn	6
FBgn0003448	0.129432	0.45332	protein_coding	sna	NA
FBgn0003449	0.536891	0.878428	protein_coding	snf	NA
FBgn0003459	0.71573	0.95114	protein_coding	stwl	NA
FBgn0003460	0.45032	0.827187	protein_coding	so	NA
FBgn0003462	0.0562105	0.276	protein_coding	Sod1	NA
FBgn0003463	0.0725887	0.325271	protein_coding	sog	NA
FBgn0003464	0.31347	0.712594	protein_coding	sol	NA
FBgn0003475	0.770324	0.966322	protein_coding	spir	NA
FBgn0003479	0.875287	0.990337	protein_coding	spn-A	NA
FBgn0003480	0.700302	0.947083	protein_coding	spn-B	NA
FBgn0003483	0.00514262	0.0502962	protein_coding	spn-E	1
FBgn0003486	0.00328666	0.0362778	protein_coding	spo	3
FBgn0003495	0.710897	0.949772	protein_coding	spz	NA
FBgn0003499	0.578532	0.896525	protein_coding	sr	NA
FBgn0003502	0.504177	0.859005	protein_coding	Btk29A	NA
FBgn0003507	0.645999	0.926254	protein_coding	srp	NA
FBgn0003510	0.41452	0.800747	protein_coding	Sry-alpha	NA
FBgn0003511	0.59034	0.903051	protein_coding	Sry-beta	NA
FBgn0003512	0.0968275	0.381829	protein_coding	Sry-delta	NA
FBgn0003514	0.00861542	0.0738223	protein_coding	sqh	1
FBgn0003515	0.0604276	0.287885	protein_coding	st	NA
FBgn0003517	0.00834394	0.0720096	protein_coding	sta	5
FBgn0003520	0.489957	0.851182	protein_coding	stau	NA
FBgn0003525	0.215236	0.597058	protein_coding	stg	NA
FBgn0003545	0.13208	0.457427	protein_coding	sub	NA
FBgn0003557	0.424668	0.808948	protein_coding	Su(dx)	NA
FBgn0003559	0.725415	0.952751	protein_coding	su(f)	NA
FBgn0003567	0.00692687	0.0628254	protein_coding	su(Hw)	5
FBgn0003575	0.421687	0.807108	protein_coding	su(sable)	NA
FBgn0003598	0.264806	0.658012	protein_coding	Su(var)3-7	NA
FBgn0003607	0.335718	0.734852	protein_coding	Su(var)205	NA
FBgn0003612	0.573438	0.894931	protein_coding	Su(var)2-10	NA
FBgn0003638	0.000549207	0.00873391	protein_coding	su(w[a])	5
FBgn0003651	0.555111	0.888144	protein_coding	svp	NA
FBgn0003654	0.368443	0.759205	protein_coding	sw	NA
FBgn0003655	0.225893	0.60867	protein_coding	swa	NA
FBgn0003656	0.142011	0.479386	protein_coding	sws	NA
FBgn0003660	0.756447	0.962124	protein_coding	Syb	NA
FBgn0003676	0.806575	0.976038	protein_coding	CCT1	NA
FBgn0003687	0.813201	0.977143	protein_coding	Tbp	NA
FBgn0003701	0.202868	0.58014	protein_coding	thr	NA
FBgn0003710	0.991468	0.999487	protein_coding	tipE	NA
FBgn0003714	0.794677	0.972874	protein_coding	tko	NA
FBgn0003716	0.0148196	0.107773	protein_coding	tkv	NA
FBgn0003721	0.499059	0.855402	protein_coding	Tm1	NA
FBgn0003731	0.0477428	0.247896	protein_coding	Egfr	NA
FBgn0003741	0.655165	0.931795	protein_coding	tra	NA
FBgn0003742	0.575993	0.894931	protein_coding	tra2	NA
FBgn0003744	0.935193	0.999487	protein_coding	trc	NA
FBgn0003748	0.0134077	0.100391	protein_coding	Treh	NA
FBgn0003862	0.822808	0.979092	protein_coding	trx	NA
FBgn0003866	0.55592	0.888638	protein_coding	tsh	NA
FBgn0003867	0.0308131	0.183201	protein_coding	tsl	NA
FBgn0003870	0.116425	0.425036	protein_coding	ttk	NA
FBgn0003882	0.956218	0.999487	protein_coding	tub	NA
FBgn0003884	0.0108229	0.0859929	protein_coding	alphaTub84B	1
FBgn0003885	0.911388	0.99701	protein_coding	alphaTub84D	NA
FBgn0003888	0.00181014	0.0229587	protein_coding	betaTub60D	1
FBgn0003890	0.581386	0.899205	protein_coding	betaTub97EF	NA
FBgn0003891	0.0177018	0.123591	protein_coding	tud	NA
FBgn0003892	0.00921446	0.0773693	protein_coding	ptc	6
FBgn0003896	0.104959	0.399528	protein_coding	tup	NA
FBgn0003941	0.274857	0.669654	protein_coding	RpL40	NA
FBgn0003942	0.118034	0.428697	protein_coding	RpS27A	NA
FBgn0003943	0.568433	0.894129	protein_coding	Ubi-p63E	NA
FBgn0003944	0.650431	0.929297	protein_coding	Ubx	NA
FBgn0003961	0.000849563	0.0126435	protein_coding	Uro	4
FBgn0003963	0.56306	0.891511	protein_coding	ush	NA
FBgn0003964	0.357731	0.750758	protein_coding	usp	NA
FBgn0003969	0.049288	0.253039	protein_coding	vap	NA
FBgn0003977	0.934733	0.999487	protein_coding	vir	NA
FBgn0003978	0.693737	0.946849	protein_coding	vls	NA
FBgn0003979	2.41131e-08	1.46724e-06	protein_coding	Vm26Aa	6
FBgn0003984	0.000853064	0.012676	protein_coding	vn	1
FBgn0003996	0.0997863	0.388203	protein_coding	w	NA
FBgn0003997	0.0135439	0.101095	protein_coding	hid	NA
FBgn0004003	0.0553735	0.272726	protein_coding	wbl	NA
FBgn0004045	6.66009e-08	3.72268e-06	protein_coding	Yp1	7
FBgn0004047	0.0264082	0.163701	protein_coding	Yp3	NA
FBgn0004049	0.887195	0.993071	protein_coding	yrt	NA
FBgn0004050	0.974118	0.999487	protein_coding	z	NA
FBgn0004055	0.365275	0.756529	protein_coding	uzip	NA
FBgn0004057	0.176391	0.53887	protein_coding	Zw	NA
FBgn0004066	0.0370209	0.209982	protein_coding	Prosalpha4	NA
FBgn0004087	0.866437	0.988254	protein_coding	Dhfr	NA
FBgn0004101	0.976389	0.999487	protein_coding	bs	NA
FBgn0004103	0.405687	0.793869	protein_coding	Pp1-87B	NA
FBgn0004106	0.0317651	0.187356	protein_coding	Cdk1	NA
FBgn0004107	0.309139	0.708179	protein_coding	Cdk2	NA
FBgn0004108	1.96745e-05	0.00054043	protein_coding	Nrt	1
FBgn0004117	0.269716	0.663949	protein_coding	Tm2	NA
FBgn0004132	0.463384	0.834108	protein_coding	boca	NA
FBgn0004133	0.680623	0.942993	protein_coding	blow	NA
FBgn0004167	0.531469	0.874532	protein_coding	kst	NA
FBgn0004168	0.474758	0.842125	protein_coding	5-HT1A	NA
FBgn0004169	0.71994	0.951933	protein_coding	up	NA
FBgn0004170	0.0185093	0.127164	protein_coding	sc	NA
FBgn0004177	0.886285	0.993071	protein_coding	mts	NA
FBgn0004179	0.490672	0.851426	protein_coding	Csp	NA
FBgn0004197	0.755731	0.9621	protein_coding	Ser	NA
FBgn0004198	0.0404809	0.222391	protein_coding	ct	NA
FBgn0004227	0.858431	0.985686	protein_coding	nonA	NA
FBgn0004228	0.000184833	0.00358987	protein_coding	mex1	3
FBgn0004237	0.850483	0.985686	protein_coding	Hrb87F	NA
FBgn0004240	0.00224568	0.0272601	protein_coding	DptA	7
FBgn0004242	0.699874	0.947083	protein_coding	Syt1	NA
FBgn0004359	0.351303	0.746558	protein_coding	T48	NA
FBgn0004362	0.00336878	0.0369277	protein_coding	HmgD	1
FBgn0004363	0.940708	0.999487	protein_coding	porin	NA
FBgn0004364	0.108898	0.408963	protein_coding	18w	NA
FBgn0004367	0.450221	0.827187	protein_coding	mei-41	NA
FBgn0004368	0.940871	0.999487	protein_coding	Ptp4E	NA
FBgn0004369	0.0404313	0.222387	protein_coding	Ptp99A	NA
FBgn0004370	0.338885	0.736205	protein_coding	Ptp10D	NA
FBgn0004373	0.694922	0.946849	protein_coding	fwd	NA
FBgn0004374	0.205842	0.584278	protein_coding	neb	NA
FBgn0004378	2.35067e-06	8.52804e-05	protein_coding	Klp61F	1
FBgn0004379	0.335898	0.734939	protein_coding	Klp67A	NA
FBgn0004380	0.89725	0.993723	protein_coding	Klp64D	NA
FBgn0004381	0.0453664	0.240172	protein_coding	Klp68D	NA
FBgn0004387	0.416608	0.802437	protein_coding	Klp98A	NA
FBgn0004390	0.337153	0.735509	protein_coding	RasGAP1	NA
FBgn0004391	0.856407	0.985686	protein_coding	shtd	NA
FBgn0004394	0.0123254	0.0945703	protein_coding	pdm2	1
FBgn0004395	0.131622	0.456169	protein_coding	unk	NA
FBgn0004396	0.0308579	0.183355	protein_coding	CrebA	NA
FBgn0004397	0.0565648	0.277314	protein_coding	Vinc	NA
FBgn0004401	0.506123	0.86049	protein_coding	Pep	NA
FBgn0004403	0.106741	0.403065	protein_coding	RpS14a	NA
FBgn0004404	0.327461	0.726432	protein_coding	RpS14b	NA
FBgn0004406	0.755417	0.9621	protein_coding	tam	NA
FBgn0004407	0.975155	0.999487	protein_coding	DNApol-gamma35	NA
FBgn0004419	0.946401	0.999487	protein_coding	me31B	NA
FBgn0004425	0.362596	0.754691	protein_coding	LysB	NA
FBgn0004426	1.25612e-35	1.09785e-32	pseudogene	LysC	3
FBgn0004427	0.49805	0.854587	protein_coding	LysD	NA
FBgn0004428	0.232352	0.617593	protein_coding	LysE	NA
FBgn0004429	0.0811201	0.345601	protein_coding	LysP	NA
FBgn0004431	0.00635348	0.0589029	protein_coding	LysX	1
FBgn0004432	0.981479	0.999487	protein_coding	Cyp1	NA
FBgn0004435	0.985278	0.999487	protein_coding	Galphaq	NA
FBgn0004436	0.727673	0.952954	protein_coding	Ubc6	NA
FBgn0004449	0.258853	0.651663	protein_coding	Ten-m	NA
FBgn0004456	0.069385	0.316746	protein_coding	mew	NA
FBgn0004463	0.253075	0.644509	protein_coding	RpIII128	NA
FBgn0004465	0.547244	0.883642	protein_coding	Su(P)	NA
FBgn0004507	0.000215969	0.00406326	protein_coding	GlyP	5
FBgn0004509	0.00467682	0.0470816	protein_coding	Fur1	4
FBgn0004510	0.540584	0.879069	protein_coding	Ets97D	NA
FBgn0004512	0.0798934	0.343053	protein_coding	Mdr49	NA
FBgn0004513	0.7617	0.964438	protein_coding	Mdr65	NA
FBgn0004516	0.656232	0.931795	protein_coding	Gad1	NA
FBgn0004552	0.00429546	0.0441203	protein_coding	Akh	4
FBgn0004556	0.139982	0.475909	protein_coding	Dbp73D	NA
FBgn0004569	0.0790857	0.341414	protein_coding	aos	NA
FBgn0004573	0.156191	0.505256	protein_coding	5-HT7	NA
FBgn0004574	0.134485	0.463253	protein_coding	Rop	NA
FBgn0004575	0.965212	0.999487	protein_coding	Syn	NA
FBgn0004580	0.177724	0.541395	protein_coding	Cbp53E	NA
FBgn0004583	0.248759	0.639829	protein_coding	ex	NA
FBgn0004584	0.00112261	0.0155965	protein_coding	Rrp1	1
FBgn0004587	0.529587	0.873469	protein_coding	B52	NA
FBgn0004595	0.0981352	0.38415	protein_coding	pros	NA
FBgn0004597	0.336579	0.735168	protein_coding	CycC	NA
FBgn0004598	0.588781	0.901769	protein_coding	Fur2	NA
FBgn0004606	0.128714	0.451792	protein_coding	zfh1	NA
FBgn0004607	1.507e-08	9.85599e-07	protein_coding	zfh2	3
FBgn0004611	0.58715	0.90159	protein_coding	Plc21C	NA
FBgn0004620	0.353112	0.747927	protein_coding	GluRIIA	NA
FBgn0004622	2.25132e-07	1.10996e-05	protein_coding	TkR99D	2
FBgn0004629	0.00395788	0.0414951	protein_coding	Cys	6
FBgn0004635	5.23509e-08	3.01378e-06	protein_coding	rho	1
FBgn0004636	0.0633237	0.297263	protein_coding	Rap1	NA
FBgn0004638	0.128055	0.450959	protein_coding	drk	NA
FBgn0004643	0.3912	0.779319	protein_coding	Zw10	NA
FBgn0004644	0.658157	0.93285	protein_coding	hh	NA
FBgn0004646	0.00010539	0.00226358	protein_coding	ogre	6
FBgn0004647	0.0429129	0.231679	protein_coding	N	NA
FBgn0004648	0.53443	0.877242	protein_coding	svr	NA
FBgn0004649	0.00145206	0.0193354	protein_coding	yl	6
FBgn0004652	0.448898	0.827187	protein_coding	fru	NA
FBgn0004654	0.0408673	0.223513	protein_coding	Pgd	NA
FBgn0004655	0.987581	0.999487	protein_coding	wapl	NA
FBgn0004656	0.897206	0.993723	protein_coding	fs(1)h	NA
FBgn0004657	0.0153767	0.110819	protein_coding	mys	NA
FBgn0004687	0.701506	0.947083	protein_coding	Mlc-c	NA
FBgn0004698	0.180331	0.545534	protein_coding	Xpc	NA
FBgn0004795	0.0484879	0.250221	protein_coding	retn	NA
FBgn0004797	0.537421	0.878428	protein_coding	mdy	NA
FBgn0004811	0.245693	0.635141	protein_coding	fs(2)ltoPP43	NA
FBgn0004828	0.812957	0.977143	protein_coding	His3.3B	NA
FBgn0004832	0.506145	0.86049	protein_coding	Xpac	NA
FBgn0004837	0.946141	0.999487	protein_coding	Su(H)	NA
FBgn0004838	0.85702	0.985686	protein_coding	Hrb27C	NA
FBgn0004839	0.0196457	0.132543	protein_coding	otk	NA
FBgn0004842	0.932375	0.999487	protein_coding	RYa-R	NA
FBgn0004852	6.26689e-05	0.00145181	protein_coding	Ac76E	5
FBgn0004855	0.83743	0.982422	protein_coding	RpII15	NA
FBgn0004856	0.767464	0.965129	protein_coding	Bx42	NA
FBgn0004858	0.359551	0.752444	protein_coding	elB	NA
FBgn0004859	0.311047	0.710649	protein_coding	ci	NA
FBgn0004860	0.866933	0.988254	protein_coding	ph-d	NA
FBgn0004861	0.049635	0.254502	protein_coding	ph-p	NA
FBgn0004862	0.900886	0.994611	protein_coding	bap	NA
FBgn0004864	0.745617	0.959629	protein_coding	hop	NA
FBgn0004865	0.267153	0.661109	protein_coding	Eip78C	NA
FBgn0004867	0.0612452	0.290386	protein_coding	RpS2	NA
FBgn0004868	0.44047	0.820514	protein_coding	Gdi	NA
FBgn0004870	0.551878	0.886587	protein_coding	bab1	NA
FBgn0004872	0.0125086	0.0954427	protein_coding	piwi	1
FBgn0004875	0.475616	0.842486	protein_coding	enc	NA
FBgn0004876	0.213506	0.593655	protein_coding	cdi	NA
FBgn0004878	7.08973e-14	9.73724e-12	protein_coding	cas	3
FBgn0004882	0.566779	0.893708	protein_coding	orb	NA
FBgn0004885	0.294205	0.690549	protein_coding	tok	NA
FBgn0004888	0.891638	0.993514	protein_coding	Scsalpha1	NA
FBgn0004889	0.572489	0.894931	protein_coding	tws	NA
FBgn0004892	0.88221	0.991533	protein_coding	sob	NA
FBgn0004893	0.976904	0.999487	protein_coding	bowl	NA
FBgn0004895	0.843159	0.983636	protein_coding	FoxL1	NA
FBgn0004901	0.406494	0.794801	protein_coding	Prat	NA
FBgn0004903	0.935298	0.999487	protein_coding	Rb97D	NA
FBgn0004907	0.757777	0.963014	protein_coding	14-3-3zeta	NA
FBgn0004908	0.777635	0.968677	protein_coding	Arl2	NA
FBgn0004910	0.00953151	0.0792698	protein_coding	Eip63F-1	6
FBgn0004911	0.704518	0.948151	ncRNA	asRNA:Eig63F-2	NA
FBgn0004913	0.455366	0.830089	protein_coding	Gnf1	NA
FBgn0004914	0.156931	0.506287	protein_coding	Hnf4	NA
FBgn0004915	0.794016	0.972712	protein_coding	TfIIB	NA
FBgn0004919	0.367474	0.75883	protein_coding	gol	NA
FBgn0004921	0.909444	0.996852	protein_coding	Ggamma1	NA
FBgn0004924	0.230099	0.615284	protein_coding	Top1	NA
FBgn0004926	0.972564	0.999487	protein_coding	eIF2beta	NA
FBgn0004957	0.638874	0.922931	protein_coding	por	NA
FBgn0005198	0.176558	0.539013	protein_coding	gig	NA
FBgn0005278	0.215325	0.597058	protein_coding	Sam-S	NA
FBgn0005322	0.389819	0.778375	protein_coding	nmd	NA
FBgn0005355	0.920073	0.999487	protein_coding	Su(fu)	NA
FBgn0005386	0.938822	0.999487	protein_coding	ash1	NA
FBgn0005391	1.74963e-05	0.000484919	protein_coding	Yp2	7
FBgn0005411	0.652447	0.930519	protein_coding	U2af50	NA
FBgn0005427	0.765071	0.964764	protein_coding	ewg	NA
FBgn0005533	0.108325	0.407448	protein_coding	RpS17	NA
FBgn0005536	0.746123	0.959629	protein_coding	Mbs	NA
FBgn0005564	0.277942	0.673081	protein_coding	Shal	NA
FBgn0005585	0.409806	0.798058	protein_coding	Calr	NA
FBgn0005586	0.956405	0.999487	protein_coding	Rab3	NA
FBgn0005593	0.100796	0.39043	protein_coding	RpL7	NA
FBgn0005596	0.552941	0.887623	protein_coding	yem	NA
FBgn0005612	0.373113	0.764042	protein_coding	Sox14	NA
FBgn0005614	0.0239738	0.154067	protein_coding	trpl	NA
FBgn0005616	0.473134	0.840709	protein_coding	msl-2	NA
FBgn0005617	0.968813	0.999487	protein_coding	msl-1	NA
FBgn0005624	0.0269091	0.165412	protein_coding	Psc	NA
FBgn0005626	0.00011823	0.00246565	protein_coding	ple	3
FBgn0005631	0.269225	0.663466	protein_coding	robo1	NA
FBgn0005632	0.379241	0.767907	protein_coding	faf	NA
FBgn0005636	0.715013	0.950662	protein_coding	nvy	NA
FBgn0005638	0.0102152	0.0830168	protein_coding	slbo	1
FBgn0005640	0.92019	0.999487	protein_coding	Eip63E	NA
FBgn0005642	0.523789	0.871107	protein_coding	wdn	NA
FBgn0005648	0.228132	0.612815	protein_coding	Pabp2	NA
FBgn0005649	0.368532	0.759205	protein_coding	Rox8	NA
FBgn0005654	0.492786	0.851995	protein_coding	Orc3	NA
FBgn0005655	1.71463e-07	8.58563e-06	protein_coding	PCNA	1
FBgn0005659	0.00204218	0.0253663	protein_coding	Ets98B	6
FBgn0005660	0.000547936	0.00873391	protein_coding	Ets21C	1
FBgn0005664	0.168999	0.52764	protein_coding	Crys	NA
FBgn0005666	0.315305	0.715445	protein_coding	bt	NA
FBgn0005670	2.68751e-43	3.22971e-40	protein_coding	Cyp4d1	4
FBgn0005671	0.584554	0.899575	protein_coding	Vha55	NA
FBgn0005672	0.00232344	0.0279219	protein_coding	spi	1
FBgn0005674	0.975172	0.999487	protein_coding	GluProRS	NA
FBgn0005677	0.90348	0.99507	protein_coding	dac	NA
FBgn0005683	0.517087	0.868193	protein_coding	pie	NA
FBgn0005694	0.0835064	0.352583	protein_coding	Aef1	NA
FBgn0005695	0.688453	0.944401	protein_coding	gcl	NA
FBgn0005696	0.00245568	0.029075	protein_coding	DNApol-alpha73	1
FBgn0005771	0.6155	0.912899	protein_coding	noc	NA
FBgn0005777	0.979948	0.999487	protein_coding	PpD3	NA
FBgn0008635	0.522661	0.871107	protein_coding	betaCOP	NA
FBgn0008636	0.633754	0.921007	protein_coding	hbn	NA
FBgn0008646	0.0483862	0.249965	protein_coding	E5	NA
FBgn0010014	0.954299	0.999487	protein_coding	CanB	NA
FBgn0010015	0.656615	0.932038	protein_coding	CanA1	NA
FBgn0010019	0.374796	0.765471	protein_coding	Cyp4g1	NA
FBgn0010038	0.218437	0.600081	protein_coding	GstD2	NA
FBgn0010039	0.332024	0.731793	protein_coding	GstD3	NA
FBgn0010040	0.739527	0.955934	protein_coding	GstD4	NA
FBgn0010041	0.0105123	0.0845445	protein_coding	GstD5	2
FBgn0010042	0.0788727	0.341132	protein_coding	GstD6	NA
FBgn0010043	0.00506821	0.0499751	protein_coding	GstD7	6
FBgn0010044	0.014301	0.104874	protein_coding	GstD8	NA
FBgn0010051	6.67462e-05	0.00151702	protein_coding	Itpr	4
FBgn0010053	0.247026	0.637641	protein_coding	Jheh1	NA
FBgn0010078	0.101658	0.392508	protein_coding	RpL23	NA
FBgn0010100	0.158771	0.510175	protein_coding	mAcon1	NA
FBgn0010105	0.928021	0.999487	protein_coding	comm	NA
FBgn0010113	0.327495	0.726432	protein_coding	hdc	NA
FBgn0010114	0.124775	0.443182	protein_coding	hig	NA
FBgn0010173	0.0664003	0.30765	protein_coding	RpA-70	NA
FBgn0010194	0.00374791	0.0399071	protein_coding	Wnt5	1
FBgn0010198	0.569728	0.894648	protein_coding	RpS15Aa	NA
FBgn0010213	0.787972	0.971249	protein_coding	Sod2	NA
FBgn0010215	0.302624	0.701931	protein_coding	alpha-Cat	NA
FBgn0010217	0.833259	0.981776	protein_coding	ATPsynbeta	NA
FBgn0010220	0.33259	0.731985	protein_coding	Dbp45A	NA
FBgn0010222	5.29618e-05	0.00126033	protein_coding	Nmdmc	3
FBgn0010223	0.0448622	0.23829	protein_coding	Galphaf	NA
FBgn0010225	0.327627	0.726432	protein_coding	Gel	NA
FBgn0010226	0.155549	0.504503	protein_coding	GstS1	NA
FBgn0010228	0.965975	0.999487	protein_coding	HmgZ	NA
FBgn0010235	0.432991	0.814793	protein_coding	Klc	NA
FBgn0010238	0.0740039	0.32917	protein_coding	Lac	NA
FBgn0010241	0.0243787	0.155623	protein_coding	Mdr50	NA
FBgn0010246	0.44641	0.824701	protein_coding	Myo61F	NA
FBgn0010247	0.211195	0.591789	protein_coding	Parp	NA
FBgn0010263	0.175418	0.537949	protein_coding	Rbp9	NA
FBgn0010265	0.043954	0.235155	protein_coding	RpS13	NA
FBgn0010269	0.426058	0.810276	protein_coding	Dsor1	NA
FBgn0010278	0.798292	0.974939	protein_coding	Ssrp	NA
FBgn0010280	0.0763639	0.334536	protein_coding	Taf4	NA
FBgn0010282	0.340395	0.737802	protein_coding	TfIIFalpha	NA
FBgn0010287	0.636864	0.922237	protein_coding	Trf	NA
FBgn0010288	0.00442127	0.0451712	protein_coding	Uch	3
FBgn0010292	0.178145	0.541647	protein_coding	bys	NA
FBgn0010300	0.0612548	0.290386	protein_coding	brat	NA
FBgn0010303	0.72522	0.952738	protein_coding	hep	NA
FBgn0010309	0.579398	0.897215	protein_coding	pigeon	NA
FBgn0010313	0.520585	0.86966	protein_coding	corto	NA
FBgn0010314	0.159381	0.511444	protein_coding	Cks30A	NA
FBgn0010315	0.337635	0.735798	protein_coding	CycD	NA
FBgn0010316	0.00318605	0.0353295	protein_coding	dap	1
FBgn0010328	0.881065	0.991142	protein_coding	woc	NA
FBgn0010333	0.489773	0.851182	protein_coding	Rac1	NA
FBgn0010339	0.798034	0.974879	protein_coding	128up	NA
FBgn0010340	0.278657	0.673586	protein_coding	140up	NA
FBgn0010341	0.236528	0.621646	protein_coding	Cdc42	NA
FBgn0010342	0.907232	0.996711	protein_coding	Map60	NA
FBgn0010348	0.635945	0.92175	protein_coding	Arf79F	NA
FBgn0010350	0.0557911	0.274501	protein_coding	Cds	NA
FBgn0010352	0.733912	0.954196	protein_coding	Nc73EF	NA
FBgn0010355	0.444873	0.823611	protein_coding	Taf1	NA
FBgn0010356	0.412892	0.80031	protein_coding	Taf5	NA
FBgn0010358	2.06684e-29	1.24191e-26	protein_coding	deltaTry	4
FBgn0010359	1.83423e-38	1.95937e-35	protein_coding	gammaTry	4
FBgn0010379	0.0446855	0.237878	protein_coding	Akt1	NA
FBgn0010380	0.575429	0.894931	protein_coding	AP-1-2beta	NA
FBgn0010382	0.0038419	0.0407233	protein_coding	CycE	1
FBgn0010383	0.603607	0.907492	protein_coding	Cyp18a1	NA
FBgn0010385	0.215888	0.597108	protein_coding	Def	NA
FBgn0010387	4.23607e-05	0.00103892	protein_coding	Acbp2	6
FBgn0010388	0.412136	0.799944	protein_coding	Dro	NA
FBgn0010389	0.148392	0.489917	protein_coding	htl	NA
FBgn0010391	0.642521	0.924039	protein_coding	SrpRalpha	NA
FBgn0010395	0.10651	0.402828	protein_coding	Itgbn	NA
FBgn0010397	0.477006	0.843158	protein_coding	LamC	NA
FBgn0010398	0.655481	0.931795	protein_coding	Lrr47	NA
FBgn0010406	0.0302053	0.180593	protein_coding	RNaseX25	NA
FBgn0010408	0.0347642	0.199655	protein_coding	RpS9	NA
FBgn0010409	0.00999452	0.0819406	protein_coding	RpL18A	5
FBgn0010411	0.154387	0.50213	protein_coding	RpS18	NA
FBgn0010412	0.308187	0.707012	protein_coding	RpS19a	NA
FBgn0010415	0.0901171	0.369776	protein_coding	Sdc	NA
FBgn0010416	0.852	0.985686	protein_coding	TH1	NA
FBgn0010417	0.200819	0.57817	protein_coding	Taf6	NA
FBgn0010421	0.727067	0.952839	protein_coding	TfIIFbeta	NA
FBgn0010422	0.876607	0.990576	protein_coding	TfIIS	NA
FBgn0010423	0.809784	0.976198	protein_coding	TpnC47D	NA
FBgn0010424	0.114596	0.421236	protein_coding	TpnC73F	NA
FBgn0010425	0.00313359	0.0349348	protein_coding	epsilonTry	3
FBgn0010434	0.093973	0.376207	protein_coding	cora	NA
FBgn0010435	0.145655	0.484863	protein_coding	emp	NA
FBgn0010438	0.799464	0.974993	protein_coding	mtSSB	NA
FBgn0010441	0.736218	0.954196	protein_coding	pll	NA
FBgn0010452	0.023758	0.152987	protein_coding	trn	NA
FBgn0010453	0.456375	0.830572	protein_coding	Wnt4	NA
FBgn0010470	0.00190172	0.0238684	protein_coding	Fkbp14	2
FBgn0010473	0.283236	0.676612	protein_coding	tutl	NA
FBgn0010482	0.746088	0.959629	protein_coding	l(2)01289	NA
FBgn0010488	0.713805	0.950488	protein_coding	NAT1	NA
FBgn0010497	0.115821	0.424355	protein_coding	dmGlut	NA
FBgn0010501	0.00340458	0.037195	protein_coding	Dcp-1	5
FBgn0010504	0.0670596	0.309511	protein_coding	kermit	NA
FBgn0010516	0.410877	0.798768	protein_coding	wal	NA
FBgn0010520	0.126779	0.447945	protein_coding	Bka	NA
FBgn0010531	0.345619	0.74103	protein_coding	Ccs	NA
FBgn0010548	0.267748	0.66137	protein_coding	Aldh-III	NA
FBgn0010549	1.42811e-05	0.000402635	protein_coding	l(2)03659	7
FBgn0010551	0.752169	0.961269	protein_coding	Phb2	NA
FBgn0010583	0.663262	0.93389	protein_coding	dock	NA
FBgn0010590	0.0995752	0.387891	protein_coding	Prosbeta1	NA
FBgn0010591	0.250198	0.641613	protein_coding	Sply	NA
FBgn0010602	0.318308	0.718696	protein_coding	lwr	NA
FBgn0010607	0.674091	0.940152	protein_coding	l(2)05714	NA
FBgn0010611	0.362168	0.754635	protein_coding	Hmgs	NA
FBgn0010612	0.216901	0.597676	protein_coding	ATPsynG	NA
FBgn0010620	4.66107e-05	0.0011316	protein_coding	CG10939	2
FBgn0010621	0.578908	0.896668	protein_coding	CCT5	NA
FBgn0010622	2.17056e-08	1.34631e-06	protein_coding	DCTN3-p24	7
FBgn0010638	0.371856	0.76344	protein_coding	Sec61beta	NA
FBgn0010651	0.735661	0.954196	protein_coding	MFS14	NA
FBgn0010660	0.663128	0.93389	protein_coding	Nup214	NA
FBgn0010741	0.810373	0.976198	protein_coding	Pfdn2	NA
FBgn0010747	0.732826	0.954067	protein_coding	Srp54k	NA
FBgn0010750	0.664851	0.934491	protein_coding	atms	NA
FBgn0010762	0.972743	0.999487	protein_coding	simj	NA
FBgn0010768	0.242557	0.629404	protein_coding	sqz	NA
FBgn0010770	0.304898	0.7043	protein_coding	ppan	NA
FBgn0010772	0.554966	0.888144	protein_coding	Xe7	NA
FBgn0010774	0.244016	0.631996	protein_coding	Ref1	NA
FBgn0010786	0.0169935	0.119952	protein_coding	l(3)02640	NA
FBgn0010803	0.228736	0.61358	protein_coding	TrpRS	NA
FBgn0010808	0.883198	0.991905	protein_coding	Chchd3	NA
FBgn0010812	0.235464	0.621456	protein_coding	unc-45	NA
FBgn0010825	0.858229	0.985686	protein_coding	Gug	NA
FBgn0010830	0.623106	0.916023	protein_coding	l(3)04053	NA
FBgn0010877	0.932806	0.999487	protein_coding	l(3)05822	NA
FBgn0010894	0.914061	0.997402	protein_coding	sinu	NA
FBgn0010905	0.686693	0.944401	protein_coding	Spn	NA
FBgn0010909	0.230382	0.615284	protein_coding	msn	NA
FBgn0010926	0.42827	0.811948	protein_coding	l(3)07882	NA
FBgn0011016	0.103023	0.395433	protein_coding	SsRbeta	NA
FBgn0011020	0.968803	0.999487	protein_coding	Sas-4	NA
FBgn0011202	0.494889	0.85316	protein_coding	dia	NA
FBgn0011204	0.0332326	0.193093	protein_coding	cue	NA
FBgn0011205	0.0878869	0.364515	protein_coding	fbl	NA
FBgn0011206	0.00263681	0.0306904	protein_coding	bol	5
FBgn0011207	0.147043	0.487351	protein_coding	pelo	NA
FBgn0011211	0.72073	0.952025	protein_coding	blw	NA
FBgn0011217	0.527512	0.873041	protein_coding	eff	NA
FBgn0011224	0.400053	0.788622	protein_coding	heph	NA
FBgn0011225	0.337461	0.735798	protein_coding	jar	NA
FBgn0011227	0.56185	0.891002	protein_coding	ox	NA
FBgn0011230	0.568177	0.894018	protein_coding	poe	NA
FBgn0011232	0.781168	0.968842	protein_coding	scat	NA
FBgn0011236	0.632567	0.920882	protein_coding	ken	NA
FBgn0011259	0.910539	0.996871	protein_coding	Sema1a	NA
FBgn0011260	1.00181e-05	0.000298186	protein_coding	Sema2a	1
FBgn0011272	0.0803926	0.344274	protein_coding	RpL13	NA
FBgn0011274	0.267297	0.661259	protein_coding	Dif	NA
FBgn0011284	0.0560002	0.275248	protein_coding	RpS4	NA
FBgn0011286	0.461226	0.833452	protein_coding	RyR	NA
FBgn0011289	0.121533	0.436285	protein_coding	TfIIA-L	NA
FBgn0011290	0.933807	0.999487	protein_coding	Taf12	NA
FBgn0011291	0.816547	0.977985	protein_coding	Taf11	NA
FBgn0011296	0.802069	0.975513	protein_coding	l(2)efl	NA
FBgn0011297	0.0015139	0.0199926	protein_coding	Alg3	7
FBgn0011300	0.920106	0.999487	protein_coding	babo	NA
FBgn0011305	0.664987	0.934491	protein_coding	Rsf1	NA
FBgn0011327	0.420212	0.805567	protein_coding	Uch-L5	NA
FBgn0011335	0.235302	0.621311	protein_coding	vers	NA
FBgn0011336	0.837718	0.982446	protein_coding	Stt3B	NA
FBgn0011361	0.198881	0.575398	protein_coding	ND-ACP	NA
FBgn0011455	0.943555	0.999487	protein_coding	ND-SGDH	NA
FBgn0011474	0.694531	0.946849	protein_coding	PR-Set7	NA
FBgn0011476	0.993847	0.999487	protein_coding	l(3)neo43	NA
FBgn0011481	0.0732507	0.327478	protein_coding	Ssdp	NA
FBgn0011509	0.689801	0.944963	protein_coding	SrpRbeta	NA
FBgn0011554	0.219134	0.6005	protein_coding	etaTry	NA
FBgn0011555	0.0282618	0.172185	protein_coding	thetaTry	NA
FBgn0011556	0.0867179	0.361538	protein_coding	zetaTry	NA
FBgn0011566	0.646933	0.926502	protein_coding	Smyd3	NA
FBgn0011570	0.0180667	0.125592	protein_coding	cpb	NA
FBgn0011573	0.759084	0.963919	protein_coding	Cdc37	NA
FBgn0011576	1.64838e-06	6.21473e-05	protein_coding	Cyp4d2	2
FBgn0011584	0.766216	0.964764	protein_coding	Trp1	NA
FBgn0011586	0.935954	0.999487	protein_coding	e(r)	NA
FBgn0011589	0.950529	0.999487	protein_coding	Elk	NA
FBgn0011591	0.00370119	0.0397732	protein_coding	fng	1
FBgn0011592	0.174774	0.536406	protein_coding	fra	NA
FBgn0011603	0.0761561	0.334017	protein_coding	ine	NA
FBgn0011604	0.947011	0.999487	protein_coding	Iswi	NA
FBgn0011606	0.863884	0.987541	protein_coding	Klp3A	NA
FBgn0011638	0.678183	0.941649	protein_coding	La	NA
FBgn0011640	0.0822023	0.348454	protein_coding	lark	NA
FBgn0011642	0.629902	0.919282	protein_coding	Zyx	NA
FBgn0011648	0.172942	0.534276	protein_coding	Mad	NA
FBgn0011655	0.602341	0.907033	protein_coding	Med	NA
FBgn0011656	0.807583	0.976196	protein_coding	Mef2	NA
FBgn0011659	0.432784	0.814793	protein_coding	Mlh1	NA
FBgn0011660	0.219486	0.600721	protein_coding	Pms2	NA
FBgn0011661	0.223991	0.606729	protein_coding	Moe	NA
FBgn0011666	0.0429188	0.231679	protein_coding	msi	NA
FBgn0011672	0.0269902	0.165785	protein_coding	Mvl	NA
FBgn0011674	0.000115259	0.00242472	protein_coding	insc	7
FBgn0011676	0.00388326	0.040981	protein_coding	Nos	7
FBgn0011692	1.85716e-05	0.000511596	protein_coding	pav	1
FBgn0011695	0.0974866	0.382774	protein_coding	EbpIII	NA
FBgn0011703	1.12414e-05	0.000328495	protein_coding	RnrL	1
FBgn0011704	7.92293e-05	0.00178386	protein_coding	RnrS	1
FBgn0011705	0.182185	0.548452	protein_coding	rost	NA
FBgn0011706	0.181271	0.54717	protein_coding	rpr	NA
FBgn0011708	0.247058	0.637641	protein_coding	Syx5	NA
FBgn0011710	0.181174	0.547141	protein_coding	2001-09-01	NA
FBgn0011715	0.338886	0.736205	protein_coding	Snr1	NA
FBgn0011722	0.15004	0.493833	protein_coding	Tig	NA
FBgn0011723	0.962377	0.999487	protein_coding	byn	NA
FBgn0011725	0.656069	0.931795	protein_coding	twin	NA
FBgn0011726	0.107268	0.404656	protein_coding	tsr	NA
FBgn0011737	0.732967	0.954067	protein_coding	Wee1	NA
FBgn0011739	0.0529094	0.265209	protein_coding	wts	NA
FBgn0011740	0.175042	0.536966	protein_coding	alpha-Man-IIa	NA
FBgn0011741	0.788091	0.971249	protein_coding	Arp6	NA
FBgn0011742	0.430749	0.81296	protein_coding	Arp2	NA
FBgn0011745	0.103232	0.395723	protein_coding	Arp1	NA
FBgn0011746	0.0107881	0.0857874	protein_coding	ana	3
FBgn0011747	0.896922	0.993717	protein_coding	Ank	NA
FBgn0011754	0.0858165	0.359182	protein_coding	PhKgamma	NA
FBgn0011760	0.799383	0.974993	protein_coding	ctp	NA
FBgn0011761	0.829837	0.980828	protein_coding	dhd	NA
FBgn0011762	0.0234651	0.151405	protein_coding	DNApol-alpha50	NA
FBgn0011763	0.284541	0.67729	protein_coding	Dp	NA
FBgn0011766	0.980116	0.999487	protein_coding	E2f1	NA
FBgn0011768	0.245635	0.635141	protein_coding	Fdh	NA
FBgn0011769	0.449287	0.827187	protein_coding	Fdx1	NA
FBgn0011770	0.0197797	0.13289	protein_coding	Gip	NA
FBgn0011771	0.165715	0.521932	protein_coding	Hem	NA
FBgn0011774	0.248411	0.639589	protein_coding	Irbp	NA
FBgn0011785	0.951311	0.999487	protein_coding	BRWD3	NA
FBgn0011787	0.463131	0.833953	protein_coding	mRpL12	NA
FBgn0011802	0.621954	0.915972	protein_coding	Gem3	NA
FBgn0011817	0.700648	0.947083	protein_coding	nmo	NA
FBgn0011818	0.573207	0.894931	protein_coding	oaf	NA
FBgn0011822	0.960417	0.999487	protein_coding	Pgcl	NA
FBgn0011824	0.255019	0.645768	protein_coding	CG4038	NA
FBgn0011826	0.735447	0.954196	protein_coding	Pp2B-14D	NA
FBgn0011828	0.947337	0.999487	protein_coding	Pxn	NA
FBgn0011829	0.629879	0.919282	protein_coding	Ret	NA
FBgn0011834	7.58028e-14	1.02643e-11	protein_coding	Ser6	3
FBgn0011836	0.841554	0.983433	protein_coding	Taf2	NA
FBgn0011837	0.80368	0.97587	protein_coding	Tis11	NA
FBgn0012034	0.772807	0.967584	protein_coding	AcCoAS	NA
FBgn0012036	0.0565496	0.277314	protein_coding	Aldh	NA
FBgn0012037	0.00214038	0.0262804	protein_coding	Ance	5
FBgn0012051	0.958925	0.999487	protein_coding	CalpA	NA
FBgn0012058	0.965397	0.999487	protein_coding	Cdc27	NA
FBgn0012344	0.236101	0.621542	protein_coding	Dh44	NA
FBgn0013263	0.513372	0.86604	protein_coding	Trl	NA
FBgn0013269	0.700479	0.947083	protein_coding	Fkbp39	NA
FBgn0013272	0.116171	0.42499	protein_coding	Gp150	NA
FBgn0013275	0.396622	0.785225	protein_coding	Hsp70Aa	NA
FBgn0013276	0.877896	0.990576	protein_coding	Hsp70Ab	NA
FBgn0013277	0.000253297	0.00460341	protein_coding	Hsp70Ba	2
FBgn0013278	0.414255	0.800747	protein_coding	Hsp70Bb	NA
FBgn0013279	0.588524	0.901769	protein_coding	Hsp70Bc	NA
FBgn0013303	0.77937	0.968677	protein_coding	Nca	NA
FBgn0013305	0.489749	0.851182	protein_coding	Nmda1	NA
FBgn0013307	0.00910249	0.0766299	protein_coding	Odc1	7
FBgn0013323	0.000536089	0.00864554	protein_coding	Ptth	7
FBgn0013325	0.254754	0.645376	protein_coding	RpL11	NA
FBgn0013334	0.939413	0.999487	protein_coding	Sap47	NA
FBgn0013342	0.780219	0.968842	protein_coding	nSyb	NA
FBgn0013343	0.608933	0.909268	protein_coding	Syx1A	NA
FBgn0013347	0.856703	0.985686	protein_coding	TfIIA-S	NA
FBgn0013432	0.00902795	0.0762026	protein_coding	bcn92	2
FBgn0013435	0.48359	0.8466	protein_coding	Cdc2rk	NA
FBgn0013467	0.311999	0.711809	protein_coding	igl	NA
FBgn0013469	0.0866622	0.361462	protein_coding	klu	NA
FBgn0013531	0.654315	0.931211	protein_coding	MED20	NA
FBgn0013548	0.0267228	0.164794	protein_coding	l(2)dtl	NA
FBgn0013563	0.650307	0.929259	protein_coding	Pex1	NA
FBgn0013576	0.239931	0.625709	protein_coding	mtd	NA
FBgn0013672	0.462522	0.833862	protein_coding	mt:ATPase6	NA
FBgn0013674	0.706707	0.948657	protein_coding	mt:CoI	NA
FBgn0013675	0.648246	0.927768	protein_coding	mt:CoII	NA
FBgn0013678	0.222645	0.604664	protein_coding	mt:Cyt-b	NA
FBgn0013679	0.45571	0.830343	protein_coding	mt:ND1	NA
FBgn0013680	0.0971677	0.382444	protein_coding	mt:ND2	NA
FBgn0013681	0.0297342	0.178554	protein_coding	mt:ND3	NA
FBgn0013683	0.0724955	0.32513	protein_coding	mt:ND4L	NA
FBgn0013684	0.371438	0.76344	protein_coding	mt:ND5	NA
FBgn0013685	4.87393e-08	2.83988e-06	protein_coding	mt:ND6	5
FBgn0013717	0.483786	0.846736	protein_coding	not	NA
FBgn0013718	0.239635	0.625538	protein_coding	nuf	NA
FBgn0013720	0.496331	0.853618	protein_coding	pck	NA
FBgn0013726	0.012939	0.0978723	protein_coding	pnut	1
FBgn0013732	0.572965	0.894931	protein_coding	sced	NA
FBgn0013733	0.577063	0.895653	protein_coding	shot	NA
FBgn0013746	0.531225	0.874532	protein_coding	alien	NA
FBgn0013749	0.0602216	0.287188	protein_coding	Arf102F	NA
FBgn0013750	0.222065	0.604202	protein_coding	Arf51F	NA
FBgn0013753	0.934421	0.999487	protein_coding	Bgb	NA
FBgn0013756	0.864489	0.987951	protein_coding	Mtor	NA
FBgn0013759	0.165744	0.521932	protein_coding	CASK	NA
FBgn0013762	0.978697	0.999487	protein_coding	Cdk5	NA
FBgn0013763	0.846329	0.985022	protein_coding	Idgf6	NA
FBgn0013764	0.809618	0.976198	protein_coding	Chi	NA
FBgn0013765	0.00113913	0.0157351	protein_coding	cnn	1
FBgn0013770	0.00489	0.0487681	protein_coding	Cp1	1
FBgn0013771	0.343594	0.738728	protein_coding	Cyp6a9	NA
FBgn0013772	0.221914	0.604202	protein_coding	Cyp6a8	NA
FBgn0013773	0.459017	0.831698	protein_coding	Cyp6a22	NA
FBgn0013799	0.429776	0.812239	protein_coding	Deaf1	NA
FBgn0013811	0.401603	0.789715	protein_coding	Dhc62B	NA
FBgn0013949	0.781536	0.969008	protein_coding	Elal	NA
FBgn0013953	0.16381	0.518389	protein_coding	Esp	NA
FBgn0013954	0.20277	0.58014	protein_coding	Fkbp12	NA
FBgn0013972	0.985151	0.999487	protein_coding	Gycalpha99B	NA
FBgn0013973	0.829809	0.980828	protein_coding	Gycbeta100B	NA
FBgn0013981	0.178176	0.541647	protein_coding	His4r	NA
FBgn0013983	0.698497	0.947083	protein_coding	imd	NA
FBgn0013987	0.310926	0.71054	protein_coding	MAPk-Ak2	NA
FBgn0013995	0.000816131	0.0122598	protein_coding	Calx	5
FBgn0013997	0.631342	0.920127	protein_coding	Nrx-IV	NA
FBgn0014000	0.853595	0.985686	protein_coding	Hf	NA
FBgn0014002	0.588779	0.901769	NA	NA	NA
FBgn0014006	0.398421	0.78718	protein_coding	Ask1	NA
FBgn0014007	0.368319	0.759205	protein_coding	Ptp69D	NA
FBgn0014009	0.111345	0.414592	protein_coding	Rab2	NA
FBgn0014010	0.539084	0.878474	protein_coding	Rab5	NA
FBgn0014011	0.000544328	0.00869297	protein_coding	Rac2	4
FBgn0014018	0.104544	0.398526	protein_coding	Rel	NA
FBgn0014020	0.156523	0.50599	protein_coding	Rho1	NA
FBgn0014022	0.412286	0.799944	protein_coding	Rlb1	NA
FBgn0014023	0.89013	0.993343	protein_coding	mRpL47	NA
FBgn0014024	0.926339	0.999487	protein_coding	Rnp4F	NA
FBgn0014026	0.0575689	0.27907	protein_coding	RpL7A	NA
FBgn0014028	0.848157	0.985072	protein_coding	SdhB	NA
FBgn0014029	0.00867517	0.0738929	protein_coding	2002-09-01	1
FBgn0014031	0.0933024	0.374918	protein_coding	Spat	NA
FBgn0014032	0.456275	0.830572	protein_coding	Sptr	NA
FBgn0014033	0.682784	0.943821	protein_coding	Sr-CI	NA
FBgn0014037	0.0961534	0.38102	protein_coding	Su(Tpl)	NA
FBgn0014073	0.0122526	0.0941791	protein_coding	Tie	6
FBgn0014075	0.734703	0.954196	protein_coding	Uggt	NA
FBgn0014092	0.753261	0.961269	protein_coding	CG4278	NA
FBgn0014127	0.335286	0.734436	protein_coding	barr	NA
FBgn0014133	0.518663	0.868715	protein_coding	bif	NA
FBgn0014135	0.0193825	0.131585	protein_coding	bnl	NA
FBgn0014141	0.0564651	0.277108	protein_coding	cher	NA
FBgn0014143	0.680839	0.943023	protein_coding	croc	NA
FBgn0014163	0.190025	0.560915	protein_coding	fax	NA
FBgn0014184	0.810486	0.976198	protein_coding	Oda	NA
FBgn0014189	0.478465	0.843647	protein_coding	Hel25E	NA
FBgn0014269	0.274196	0.669001	protein_coding	prod	NA
FBgn0014340	0.923355	0.999487	protein_coding	mof	NA
FBgn0014342	0.326602	0.726432	protein_coding	mia	NA
FBgn0014343	0.0439014	0.235005	protein_coding	mirr	NA
FBgn0014366	0.721771	0.952128	protein_coding	noi	NA
FBgn0014380	0.489942	0.851182	protein_coding	RhoL	NA
FBgn0014388	0.0700698	0.318813	protein_coding	sty	NA
FBgn0014391	0.804298	0.97587	protein_coding	sun	NA
FBgn0014395	0.294296	0.690554	protein_coding	tilB	NA
FBgn0014396	0.595413	0.904496	protein_coding	tim	NA
FBgn0014411	0.252012	0.643823	protein_coding	Vps26	NA
FBgn0014417	0.338731	0.736205	protein_coding	CG13397	NA
FBgn0014427	0.0473921	0.247562	protein_coding	CG11899	NA
FBgn0014455	0.17421	0.535783	protein_coding	Ahcy	NA
FBgn0014469	0.570438	0.894648	protein_coding	Cyp4e2	NA
FBgn0014857	0.0889365	0.367415	protein_coding	His3.3A	NA
FBgn0014859	0.426348	0.810276	protein_coding	Hr38	NA
FBgn0014861	0.0026401	0.0306915	protein_coding	Mcm2	1
FBgn0014863	0.103546	0.396295	protein_coding	Mlp84B	NA
FBgn0014868	0.727064	0.952839	protein_coding	Ost48	NA
FBgn0014869	0.47517	0.842288	protein_coding	Pglym78	NA
FBgn0014870	0.784159	0.969983	protein_coding	Psi	NA
FBgn0014877	0.318435	0.718814	protein_coding	Roe1	NA
FBgn0014879	0.947037	0.999487	protein_coding	Set	NA
FBgn0014903	0.00802486	0.0700736	protein_coding	CG14630	6
FBgn0014906	0.0502165	0.256518	protein_coding	Hydr2	NA
FBgn0014930	0.208634	0.588679	protein_coding	CG2846	NA
FBgn0014931	0.706279	0.948613	protein_coding	CG2678	NA
FBgn0015000	0.341227	0.738109	protein_coding	betaggt-I	NA
FBgn0015001	9.5167e-05	0.00206999	protein_coding	iotaTry	5
FBgn0015010	7.52377e-06	0.000231098	protein_coding	Ag5r	2
FBgn0015011	0.0608429	0.28929	protein_coding	AhcyL2	NA
FBgn0015019	0.454801	0.829373	protein_coding	CCT3	NA
FBgn0015024	0.628374	0.918253	protein_coding	CkIalpha	NA
FBgn0015025	0.434719	0.816422	protein_coding	CkIIalpha-i1	NA
FBgn0015031	0.903263	0.99507	protein_coding	cype	NA
FBgn0015033	0.57281	0.894931	protein_coding	Cyp4d8	NA
FBgn0015034	0.325833	0.725919	protein_coding	Cyp4e1	NA
FBgn0015035	0.000243865	0.00448283	protein_coding	Cyp4e3	3
FBgn0015036	0.244494	0.632894	protein_coding	Cyp4ae1	NA
FBgn0015037	1.43275e-20	3.72282e-18	protein_coding	Cyp4p1	4
FBgn0015038	0.434876	0.816422	protein_coding	Cyp9b1	NA
FBgn0015039	5.71076e-07	2.47312e-05	protein_coding	Cyp9b2	2
FBgn0015040	0.00279802	0.0321004	protein_coding	Cyp9c1	4
FBgn0015075	0.834056	0.981776	protein_coding	Ddx1	NA
FBgn0015218	0.321181	0.721271	protein_coding	eIF4E1	NA
FBgn0015221	0.074119	0.329441	protein_coding	Fer2LCH	NA
FBgn0015222	0.13012	0.454389	protein_coding	Fer1HCH	NA
FBgn0015229	0.0410439	0.224121	protein_coding	glec	NA
FBgn0015239	0.374297	0.765433	protein_coding	Hr78	NA
FBgn0015240	0.325969	0.725936	protein_coding	Hr96	NA
FBgn0015245	0.903753	0.99507	protein_coding	Hsp60A	NA
FBgn0015247	0.271932	0.667607	protein_coding	Diap2	NA
FBgn0015268	0.175685	0.538082	protein_coding	Nap1	NA
FBgn0015269	0.736252	0.954196	protein_coding	Nf1	NA
FBgn0015270	0.486395	0.849755	protein_coding	Orc2	NA
FBgn0015271	0.874997	0.990337	protein_coding	Orc5	NA
FBgn0015277	0.68166	0.943274	protein_coding	Pi3K59F	NA
FBgn0015278	0.253893	0.644518	protein_coding	Pi3K68D	NA
FBgn0015279	0.582961	0.89932	protein_coding	Pi3K92E	NA
FBgn0015282	0.71631	0.951178	protein_coding	Rpt2	NA
FBgn0015283	0.0516418	0.261741	protein_coding	Rpn10	NA
FBgn0015286	0.0969924	0.382323	protein_coding	Rala	NA
FBgn0015288	0.0110869	0.0879309	protein_coding	RpL22	5
FBgn0015295	0.803768	0.97587	protein_coding	Shark	NA
FBgn0015296	0.00732704	0.0655275	protein_coding	Shc	1
FBgn0015298	0.557178	0.888638	protein_coding	Srp19	NA
FBgn0015299	0.519439	0.869094	protein_coding	Ssb-c31a	NA
FBgn0015316	0.00671048	0.0612092	protein_coding	Try29F	5
FBgn0015320	0.712644	0.950488	protein_coding	Ubc2	NA
FBgn0015321	0.325679	0.725919	protein_coding	Ubc4	NA
FBgn0015331	0.971226	0.999487	protein_coding	abs	NA
FBgn0015336	4.27301e-05	0.00104531	protein_coding	CG15865	3
FBgn0015338	0.477699	0.843647	protein_coding	CG5861	NA
FBgn0015351	0.0136719	0.1015	protein_coding	CG14906	NA
FBgn0015359	0.91012	0.996871	protein_coding	CG2034	NA
FBgn0015360	0.929295	0.999487	protein_coding	oxt	NA
FBgn0015371	0.588205	0.901769	protein_coding	chn	NA
FBgn0015372	0.000188378	0.003644	protein_coding	RabX1	1
FBgn0015376	0.00086589	0.0128021	protein_coding	cutlet	1
FBgn0015379	0.524051	0.871107	protein_coding	dod	NA
FBgn0015380	3.21157e-05	0.000834487	protein_coding	drl	4
FBgn0015391	0.224654	0.607128	protein_coding	glu	NA
FBgn0015393	0.511613	0.864817	NA	NA	NA
FBgn0015396	0.0184414	0.126953	protein_coding	jumu	NA
FBgn0015399	0.0235097	0.151591	protein_coding	kek1	NA
FBgn0015400	0.998056	0.999487	protein_coding	kek2	NA
FBgn0015402	0.965102	0.999487	protein_coding	ksr	NA
FBgn0015477	0.618284	0.914325	protein_coding	Rme-8	NA
FBgn0015509	0.741762	0.95735	protein_coding	Cul1	NA
FBgn0015513	0.442172	0.821935	protein_coding	mbc	NA
FBgn0015520	0.356005	0.750379	protein_coding	nonA-l	NA
FBgn0015521	0.113625	0.419488	protein_coding	RpS21	NA
FBgn0015522	0.878505	0.990576	protein_coding	olf186-M	NA
FBgn0015524	0.927412	0.999487	protein_coding	otp	NA
FBgn0015527	0.367099	0.758367	protein_coding	peng	NA
FBgn0015544	0.54048	0.879069	protein_coding	spag	NA
FBgn0015546	0.00504395	0.049837	protein_coding	spel1	1
FBgn0015550	0.453231	0.828382	protein_coding	tap	NA
FBgn0015553	0.10312	0.395608	protein_coding	tos	NA
FBgn0015558	0.997437	0.999487	protein_coding	tty	NA
FBgn0015568	0.120979	0.435378	protein_coding	alpha-Est1	NA
FBgn0015569	0.0599106	0.286618	protein_coding	alpha-Est10	NA
FBgn0015570	0.147645	0.488625	protein_coding	alpha-Est2	NA
FBgn0015571	0.482355	0.846079	protein_coding	alpha-Est3	NA
FBgn0015572	0.714735	0.950662	protein_coding	alpha-Est4	NA
FBgn0015575	1.40592e-05	0.000399335	protein_coding	alpha-Est7	5
FBgn0015576	0.0448393	0.23829	protein_coding	alpha-Est8	NA
FBgn0015577	0.447156	0.825355	protein_coding	alpha-Est9	NA
FBgn0015582	0.085381	0.357982	protein_coding	dare	NA
FBgn0015589	0.0225217	0.146696	protein_coding	Apc	NA
FBgn0015591	0.0568456	0.2777	protein_coding	AstA	NA
FBgn0015600	0.422855	0.808055	protein_coding	toc	NA
FBgn0015602	0.710739	0.949772	protein_coding	BEAF-32	NA
FBgn0015609	0.174012	0.535783	protein_coding	CadN	NA
FBgn0015614	0.513689	0.866118	protein_coding	CanB2	NA
FBgn0015615	0.98321	0.999487	protein_coding	SMC3	NA
FBgn0015618	0.894015	0.993549	protein_coding	Cdk8	NA
FBgn0015621	0.943703	0.999487	protein_coding	Clp	NA
FBgn0015622	0.00111334	0.0154901	protein_coding	Cnx99A	2
FBgn0015623	0.0954764	0.379615	protein_coding	Cpr	NA
FBgn0015625	0.0938586	0.376139	protein_coding	CycB3	NA
FBgn0015663	0.985809	0.999487	protein_coding	Ugt36A1	NA
FBgn0015664	0.0753072	0.332244	protein_coding	Dref	NA
FBgn0015714	0.458679	0.831555	protein_coding	Cyp6a17	NA
FBgn0015721	0.680505	0.942993	protein_coding	ktub	NA
FBgn0015737	0.996057	0.999487	protein_coding	Hmu	NA
FBgn0015754	0.882767	0.991695	protein_coding	Lis-1	NA
FBgn0015756	0.0851899	0.357493	protein_coding	RpL9	NA
FBgn0015765	0.248055	0.639014	protein_coding	p38a	NA
FBgn0015766	0.142463	0.4799	protein_coding	Msr-110	NA
FBgn0015772	0.500674	0.856567	protein_coding	Nak	NA
FBgn0015773	0.0404339	0.222387	protein_coding	NetA	NA
FBgn0015774	0.375786	0.766384	protein_coding	NetB	NA
FBgn0015776	0.0249293	0.157239	protein_coding	nrv1	NA
FBgn0015777	0.473549	0.841068	protein_coding	nrv2	NA
FBgn0015778	0.193297	0.56695	protein_coding	rin	NA
FBgn0015781	0.174754	0.536406	protein_coding	P5cr	NA
FBgn0015789	0.216428	0.597418	protein_coding	Rab10	NA
FBgn0015790	0.870795	0.989301	protein_coding	Rab11	NA
FBgn0015791	0.922501	0.999487	protein_coding	Rab14	NA
FBgn0015793	0.668109	0.937557	protein_coding	Rab19	NA
FBgn0015794	0.0744235	0.330404	protein_coding	Rab18	NA
FBgn0015795	0.482636	0.846115	protein_coding	Rab7	NA
FBgn0015797	0.38299	0.771291	protein_coding	Rab6	NA
FBgn0015799	0.184823	0.551485	protein_coding	Rbf	NA
FBgn0015801	0.183647	0.549512	protein_coding	Reg-5	NA
FBgn0015803	0.561743	0.891002	protein_coding	RtGEF	NA
FBgn0015805	0.4704	0.839041	protein_coding	HDAC1	NA
FBgn0015808	0.000211512	0.00400291	protein_coding	ScpX	2
FBgn0015818	0.780967	0.968842	protein_coding	Spx	NA
FBgn0015828	0.890687	0.993343	protein_coding	TfIIEalpha	NA
FBgn0015829	0.0384544	0.214942	protein_coding	TfIIEbeta	NA
FBgn0015834	0.0888912	0.367412	protein_coding	eIF3i	NA
FBgn0015838	0.844365	0.983966	protein_coding	Vang	NA
FBgn0015872	0.158982	0.510504	protein_coding	Drip	NA
FBgn0015903	0.122786	0.43839	protein_coding	apt	NA
FBgn0015904	0.00242034	0.0287629	protein_coding	ara	2
FBgn0015905	0.380457	0.769398	protein_coding	ast	NA
FBgn0015919	0.00311527	0.0349348	protein_coding	caup	6
FBgn0015924	0.738518	0.955335	protein_coding	crq	NA
FBgn0015925	0.996119	0.999487	protein_coding	csul	NA
FBgn0015926	0.0485426	0.250278	protein_coding	dah	NA
FBgn0015929	4.79734e-06	0.000156345	protein_coding	dpa	1
FBgn0015949	0.779585	0.968677	protein_coding	hrg	NA
FBgn0016013	0.543769	0.881288	protein_coding	Faa	NA
FBgn0016031	0.496534	0.85376	protein_coding	lama	NA
FBgn0016032	0.0514877	0.261287	protein_coding	lbm	NA
FBgn0016034	0.322935	0.723195	protein_coding	mael	NA
FBgn0016038	0.972792	0.999487	protein_coding	Vsp37A	NA
FBgn0016041	0.257907	0.65028	protein_coding	Tom40	NA
FBgn0016054	0.193198	0.56695	protein_coding	phr6-4	NA
FBgn0016059	0.0609153	0.289491	protein_coding	Sema1b	NA
FBgn0016061	0.00469787	0.047244	protein_coding	side	3
FBgn0016070	0.393878	0.781417	protein_coding	smg	NA
FBgn0016075	0.421648	0.807108	protein_coding	vkg	NA
FBgn0016076	0.880701	0.991142	protein_coding	vri	NA
FBgn0016078	0.577228	0.895653	protein_coding	wun	NA
FBgn0016080	0.256385	0.647631	NA	NA	NA
FBgn0016081	0.986496	0.999487	protein_coding	fry	NA
FBgn0016119	0.862499	0.986591	protein_coding	ATPsynCF6	NA
FBgn0016120	0.6608	0.933682	protein_coding	ATPsynD	NA
FBgn0016122	0.505468	0.860254	protein_coding	Acer	NA
FBgn0016123	0.460602	0.833277	protein_coding	Alp4	NA
FBgn0016126	0.0948085	0.378211	protein_coding	CaMKI	NA
FBgn0016131	0.116182	0.42499	protein_coding	Cdk4	NA
FBgn0016641	0.972014	0.999487	protein_coding	PTP-ER	NA
FBgn0016650	0.320489	0.720576	protein_coding	Lgr1	NA
FBgn0016672	0.02832	0.172431	protein_coding	Ipp	NA
FBgn0016675	8.17297e-06	0.000247091	protein_coding	Lectin-galC1	4
FBgn0016684	0.00983888	0.0811244	protein_coding	NaPi-T	5
FBgn0016685	0.608571	0.908933	protein_coding	Nlp	NA
FBgn0016687	0.338036	0.735933	protein_coding	Nurf-38	NA
FBgn0016691	0.997746	0.999487	protein_coding	ATPsynO	NA
FBgn0016693	0.544461	0.881453	protein_coding	Past1	NA
FBgn0016694	0.91536	0.997537	protein_coding	Pdp1	NA
FBgn0016696	0.481001	0.84509	protein_coding	Pitslre	NA
FBgn0016697	0.102538	0.39494	protein_coding	Prosalpha5	NA
FBgn0016698	0.0820366	0.348058	protein_coding	Ptpa	NA
FBgn0016701	0.832027	0.981727	protein_coding	Rab4	NA
FBgn0016715	0.350867	0.746091	protein_coding	Reg-2	NA
FBgn0016754	0.0993142	0.387188	protein_coding	sba	NA
FBgn0016756	0.375888	0.766384	protein_coding	Usp47	NA
FBgn0016762	0.224037	0.606729	protein_coding	angel	NA
FBgn0016794	0.0216127	0.142594	protein_coding	dos	NA
FBgn0016797	0.28352	0.676612	protein_coding	fz2	NA
FBgn0016917	0.956709	0.999487	protein_coding	Stat92E	NA
FBgn0016920	0.321865	0.721633	protein_coding	nompC	NA
FBgn0016926	0.749727	0.960301	protein_coding	Pino	NA
FBgn0016930	0.272939	0.668608	protein_coding	Dyrk2	NA
FBgn0016970	0.899819	0.994266	protein_coding	l(2)k10201	NA
FBgn0016975	0.181632	0.547402	protein_coding	stnB	NA
FBgn0016976	0.181632	0.547402	protein_coding	stnA	NA
FBgn0016977	0.66505	0.934491	protein_coding	spen	NA
FBgn0016978	0.671693	0.939432	protein_coding	snRNP-U1-70K	NA
FBgn0016983	0.334789	0.734017	protein_coding	smid	NA
FBgn0016984	0.57598	0.894931	protein_coding	sktl	NA
FBgn0017414	0.904471	0.995146	protein_coding	cag	NA
FBgn0017418	0.609857	0.909268	protein_coding	ari-1	NA
FBgn0017429	0.881501	0.991199	protein_coding	CG5989	NA
FBgn0017430	0.768092	0.965318	protein_coding	Nelf-E	NA
FBgn0017448	0.0559848	0.275248	protein_coding	CG2187	NA
FBgn0017457	0.759644	0.964121	protein_coding	U2af38	NA
FBgn0017482	0.291026	0.686269	protein_coding	T3dh	NA
FBgn0017545	0.0991252	0.386608	protein_coding	RpS3A	NA
FBgn0017550	0.791373	0.9721	protein_coding	Rga	NA
FBgn0017551	0.872161	0.989365	protein_coding	Rca1	NA
FBgn0017558	0.0909923	0.371059	protein_coding	Pdk	NA
FBgn0017561	4.32831e-05	0.00105615	protein_coding	Ork1	6
FBgn0017566	0.960432	0.999487	protein_coding	ND-75	NA
FBgn0017567	0.500698	0.856567	protein_coding	ND-23	NA
FBgn0017572	0.995204	0.999487	protein_coding	Mo25	NA
FBgn0017577	1.67446e-08	1.08042e-06	protein_coding	Mcm5	1
FBgn0017578	0.280931	0.675677	protein_coding	Max	NA
FBgn0017579	0.356769	0.750379	protein_coding	RpL14	NA
FBgn0017581	0.987862	0.999487	protein_coding	Lk6	NA
FBgn0019624	0.883926	0.992454	protein_coding	COX5A	NA
FBgn0019637	0.91192	0.99701	protein_coding	Atu	NA
FBgn0019643	0.00585778	0.0558144	protein_coding	AANAT1	2
FBgn0019644	0.981511	0.999487	protein_coding	ATPsynB	NA
FBgn0019650	0.00937247	0.0783538	protein_coding	toy	4
FBgn0019661	0.215772	0.597108	ncRNA	lncRNA:roX1	NA
FBgn0019662	0.834036	0.981776	protein_coding	qm	NA
FBgn0019686	0.722218	0.952326	protein_coding	lok	NA
FBgn0019830	0.565992	0.893369	protein_coding	colt	NA
FBgn0019890	0.11226	0.417029	protein_coding	Smg5	NA
FBgn0019925	0.11126	0.414435	protein_coding	Surf4	NA
FBgn0019928	1.68911e-07	8.50214e-06	protein_coding	Ser8	2
FBgn0019929	0.804792	0.97587	protein_coding	Ser7	NA
FBgn0019932	0.822582	0.979092	protein_coding	SamDC	NA
FBgn0019936	0.216824	0.597634	protein_coding	RpS20	NA
FBgn0019938	0.353821	0.748311	protein_coding	RpI1	NA
FBgn0019949	0.545202	0.881773	protein_coding	Cdk9	NA
FBgn0019952	8.55975e-05	0.00190494	protein_coding	Orct	6
FBgn0019957	0.789731	0.971691	protein_coding	ND-42	NA
FBgn0019960	0.962832	0.999487	protein_coding	Mitofilin	NA
FBgn0019968	0.604017	0.90763	protein_coding	Khc-73	NA
FBgn0019972	0.000682719	0.0104684	protein_coding	Drice	4
FBgn0019982	0.40228	0.790275	protein_coding	Gs1l	NA
FBgn0019985	0.283577	0.676612	protein_coding	mGluR	NA
FBgn0019990	0.443902	0.823161	protein_coding	Gcn2	NA
FBgn0020018	0.412002	0.799895	protein_coding	Ppox	NA
FBgn0020224	0.00619761	0.0581873	protein_coding	Cbl	7
FBgn0020235	0.962293	0.999487	protein_coding	ATPsyngamma	NA
FBgn0020236	0.0078257	0.0687089	protein_coding	ATPCL	6
FBgn0020238	0.0914896	0.371768	protein_coding	14-3-3epsilon	NA
FBgn0020249	0.486288	0.849755	protein_coding	stck	NA
FBgn0020251	0.0827162	0.350323	protein_coding	sfl	NA
FBgn0020255	0.805615	0.97587	protein_coding	Ran	NA
FBgn0020257	0.0891069	0.367829	protein_coding	Ppa	NA
FBgn0020258	0.513282	0.86604	protein_coding	ppk	NA
FBgn0020261	0.633451	0.921007	protein_coding	pcm	NA
FBgn0020269	0.0910073	0.371059	protein_coding	mspo	NA
FBgn0020270	0.842073	0.983561	protein_coding	mre11	NA
FBgn0020272	0.590584	0.903051	protein_coding	mst	NA
FBgn0020278	0.37231	0.76346	protein_coding	loco	NA
FBgn0020279	0.767137	0.965094	protein_coding	lig	NA
FBgn0020294	0.261087	0.654513	protein_coding	ko	NA
FBgn0020299	0.00872197	0.0742062	protein_coding	stumps	1
FBgn0020300	0.305702	0.70497	protein_coding	geko	NA
FBgn0020304	0.0437619	0.23467	protein_coding	drongo	NA
FBgn0020305	0.56047	0.890092	protein_coding	dbe	NA
FBgn0020306	0.0306084	0.182323	protein_coding	dom	NA
FBgn0020307	0.139991	0.475909	protein_coding	dve	NA
FBgn0020309	0.84925	0.985369	protein_coding	crol	NA
FBgn0020312	0.614207	0.912007	protein_coding	Tmtc3	NA
FBgn0020369	0.420205	0.805567	protein_coding	Rpt6	NA
FBgn0020370	0.842285	0.983628	protein_coding	TppII	NA
FBgn0020379	0.683267	0.943846	protein_coding	Rfx	NA
FBgn0020381	0.50425	0.859005	protein_coding	Dredd	NA
FBgn0020385	0.184504	0.550998	protein_coding	pug	NA
FBgn0020386	0.152606	0.498863	protein_coding	Pdk1	NA
FBgn0020388	0.00221458	0.0270058	protein_coding	Gcn5	3
FBgn0020389	0.474578	0.841963	protein_coding	Papss	NA
FBgn0020391	0.551927	0.886587	protein_coding	Nrk	NA
FBgn0020392	0.8954	0.993717	protein_coding	Nmt	NA
FBgn0020407	0.450984	0.827187	protein_coding	asun	NA
FBgn0020412	0.0816013	0.34667	protein_coding	JIL-1	NA
FBgn0020414	0.0133208	0.0998953	protein_coding	Idgf3	3
FBgn0020415	0.435468	0.816692	protein_coding	Idgf2	NA
FBgn0020416	0.622572	0.916023	protein_coding	Idgf1	NA
FBgn0020440	0.924718	0.999487	protein_coding	Fak	NA
FBgn0020443	0.737367	0.955011	protein_coding	eRF3	NA
FBgn0020445	0.988801	0.999487	protein_coding	E23	NA
FBgn0020493	0.702087	0.947083	protein_coding	Dad	NA
FBgn0020496	0.52008	0.869574	protein_coding	CtBP	NA
FBgn0020497	0.804594	0.97587	protein_coding	emb	NA
FBgn0020503	0.0436551	0.234338	protein_coding	CLIP-190	NA
FBgn0020506	0.16223	0.515597	protein_coding	Amyrel	NA
FBgn0020508	4.48961e-07	2.04565e-05	protein_coding	Ag5r2	3
FBgn0020510	0.182342	0.548452	protein_coding	Abi	NA
FBgn0020513	0.0309725	0.183808	protein_coding	Paics	NA
FBgn0020521	0.0735197	0.328063	protein_coding	pio	NA
FBgn0020545	0.710464	0.949722	protein_coding	kraken	NA
FBgn0020616	0.410181	0.798276	protein_coding	SA	NA
FBgn0020618	0.080381	0.344274	protein_coding	Rack1	NA
FBgn0020620	0.893705	0.993549	protein_coding	RN-tre	NA
FBgn0020621	0.501606	0.857322	protein_coding	Pkn	NA
FBgn0020622	0.00776601	0.0682961	protein_coding	Pi3K21B	7
FBgn0020626	0.665399	0.934651	protein_coding	Osbp	NA
FBgn0020633	2.63864e-07	1.269e-05	protein_coding	Mcm7	1
FBgn0020647	0.839963	0.982935	protein_coding	KrT95D	NA
FBgn0020653	0.413899	0.800747	protein_coding	Trxr-1	NA
FBgn0020655	0.0372813	0.210837	protein_coding	ArfGAP1	NA
FBgn0020660	0.961666	0.999487	protein_coding	eIF4B	NA
FBgn0020762	0.521737	0.870527	protein_coding	Atet	NA
FBgn0020764	0.202646	0.58014	protein_coding	Alas	NA
FBgn0020767	0.342459	0.738109	protein_coding	Spred	NA
FBgn0020880	0.139959	0.475909	protein_coding	CG7179	NA
FBgn0020887	0.106345	0.402764	protein_coding	Su(z)12	NA
FBgn0020906	0.0174573	0.122239	protein_coding	Jon25Bi	NA
FBgn0020907	0.312448	0.712326	protein_coding	Scp2	NA
FBgn0020909	0.423175	0.808345	protein_coding	Rtc1	NA
FBgn0020910	0.00662205	0.0606906	protein_coding	RpL3	5
FBgn0020912	0.0464066	0.243995	protein_coding	Ptx1	NA
FBgn0020930	0.70023	0.947083	protein_coding	Dgkepsilon	NA
FBgn0021738	0.0876837	0.3643	protein_coding	Crg-1	NA
FBgn0021750	0.957793	0.999487	protein_coding	SerRS-m	NA
FBgn0021760	0.767971	0.965318	protein_coding	chb	NA
FBgn0021761	0.371735	0.76344	protein_coding	Nup154	NA
FBgn0021764	0.00132967	0.0180287	protein_coding	sdk	2
FBgn0021765	0.492045	0.851426	protein_coding	scu	NA
FBgn0021767	0.23461	0.620337	protein_coding	org-1	NA
FBgn0021768	0.767566	0.965129	protein_coding	nudC	NA
FBgn0021776	0.0038919	0.0409822	protein_coding	mira	7
FBgn0021795	0.489632	0.851182	protein_coding	Tapdelta	NA
FBgn0021796	0.859883	0.985917	protein_coding	Tor	NA
FBgn0021800	0.103712	0.396457	protein_coding	Reph	NA
FBgn0021814	0.0975049	0.382774	protein_coding	Vps28	NA
FBgn0021825	0.325157	0.725418	protein_coding	DCTN2-p50	NA
FBgn0021847	0.407592	0.795534	protein_coding	Ttc7	NA
FBgn0021856	0.884982	0.992791	protein_coding	l(2)k14505	NA
FBgn0021872	0.694723	0.946849	protein_coding	Xbp1	NA
FBgn0021874	0.212697	0.593403	protein_coding	Nle	NA
FBgn0021875	0.53771	0.878428	protein_coding	Zfrp8	NA
FBgn0021895	0.899845	0.994266	protein_coding	ytr	NA
FBgn0021906	0.942138	0.999487	protein_coding	RFeSP	NA
FBgn0021944	0.0548276	0.270864	protein_coding	Coprox	NA
FBgn0021967	0.526598	0.872831	protein_coding	ND-PDSW	NA
FBgn0021979	0.466487	0.836561	protein_coding	l(2)k09913	NA
FBgn0021995	0.472949	0.840709	protein_coding	Rs1	NA
FBgn0022023	0.00181289	0.0229633	protein_coding	eIF3h	5
FBgn0022027	0.567899	0.893873	protein_coding	Vps25	NA
FBgn0022029	0.12841	0.451351	protein_coding	l(2)k01209	NA
FBgn0022069	0.323706	0.724082	protein_coding	Nnp-1	NA
FBgn0022097	0.658999	0.933218	protein_coding	Vha36-1	NA
FBgn0022153	0.531596	0.874532	protein_coding	l(2)k05819	NA
FBgn0022160	0.0175199	0.122499	protein_coding	Gpo1	NA
FBgn0022213	0.866515	0.988254	protein_coding	Cse1	NA
FBgn0022224	0.892412	0.993549	protein_coding	ubl	NA
FBgn0022238	0.318533	0.718851	protein_coding	lolal	NA
FBgn0022288	0.386595	0.774417	protein_coding	l(2)09851	NA
FBgn0022338	0.0127212	0.0967834	protein_coding	dnk	1
FBgn0022343	0.840122	0.982935	protein_coding	CG3760	NA
FBgn0022344	0.98914	0.999487	protein_coding	CG10340	NA
FBgn0022349	0.449147	0.827187	protein_coding	CG1910	NA
FBgn0022355	0.00401013	0.041815	protein_coding	Tsf1	7
FBgn0022359	0.31863	0.718851	protein_coding	Sodh-2	NA
FBgn0022361	0.21068	0.591036	protein_coding	Pur-alpha	NA
FBgn0022382	0.536346	0.878428	protein_coding	Pka-R2	NA
FBgn0022699	0.809433	0.976198	protein_coding	D19B	NA
FBgn0022700	2.29573e-10	2.02487e-08	protein_coding	Cht4	1
FBgn0022702	0.0143399	0.104999	protein_coding	Cht2	NA
FBgn0022709	0.638315	0.922851	protein_coding	Adk1	NA
FBgn0022710	0.593262	0.903496	protein_coding	Ac13E	NA
FBgn0022724	0.819844	0.978944	protein_coding	Taf8	NA
FBgn0022740	0.0246924	0.156604	protein_coding	HLH54F	NA
FBgn0022764	0.38361	0.771393	protein_coding	Sin3A	NA
FBgn0022768	0.893862	0.993549	protein_coding	Pp2C1	NA
FBgn0022770	0.73603	0.954196	protein_coding	Peritrophin-A	NA
FBgn0022772	0.137417	0.469817	NA	NA	NA
FBgn0022774	6.1183e-07	2.61428e-05	protein_coding	Oat	6
FBgn0022786	0.6517	0.930161	protein_coding	Hira	NA
FBgn0022787	0.783505	0.969983	protein_coding	Hel89B	NA
FBgn0022800	0.550437	0.886544	protein_coding	Cad96Ca	NA
FBgn0022893	0.000212729	0.00401803	protein_coding	Df31	1
FBgn0022935	0.998996	0.999487	protein_coding	D19A	NA
FBgn0022936	0.71728	0.951178	protein_coding	CycH	NA
FBgn0022942	0.672361	0.93951	protein_coding	Cbp80	NA
FBgn0022943	0.679574	0.942299	protein_coding	Cbp20	NA
FBgn0022959	0.273269	0.668608	protein_coding	yps	NA
FBgn0022960	0.858679	0.985686	protein_coding	vimar	NA
FBgn0022984	0.202837	0.58014	protein_coding	qkr58E-3	NA
FBgn0022985	0.894882	0.993707	protein_coding	qkr58E-2	NA
FBgn0022986	0.79238	0.972608	protein_coding	qkr58E-1	NA
FBgn0022987	0.755718	0.9621	protein_coding	qkr54B	NA
FBgn0023000	0.317733	0.717905	protein_coding	mth	NA
FBgn0023001	0.00235841	0.0282229	protein_coding	melt	4
FBgn0023023	0.512304	0.86502	protein_coding	CRMP	NA
FBgn0023076	0.0599762	0.286729	protein_coding	Clk	NA
FBgn0023081	0.724096	0.952738	protein_coding	gek	NA
FBgn0023083	0.0104822	0.0844729	protein_coding	fray	6
FBgn0023091	0.0798875	0.343053	protein_coding	dimm	NA
FBgn0023094	0.584179	0.899327	protein_coding	cyc	NA
FBgn0023095	0.148919	0.490982	protein_coding	caps	NA
FBgn0023096	0.941928	0.999487	protein_coding	btv	NA
FBgn0023097	0.0544469	0.269897	protein_coding	bon	NA
FBgn0023129	0.250845	0.642481	protein_coding	aay	NA
FBgn0023130	0.497239	0.853806	protein_coding	a6	NA
FBgn0023143	0.295234	0.691107	protein_coding	Uba1	NA
FBgn0023167	0.9605	0.999487	protein_coding	SmD3	NA
FBgn0023169	0.871679	0.989365	protein_coding	AMPKalpha	NA
FBgn0023171	0.383404	0.771291	protein_coding	rnh1	NA
FBgn0023172	0.609554	0.909268	protein_coding	RhoGEF2	NA
FBgn0023174	0.270444	0.665315	protein_coding	Prosbeta2	NA
FBgn0023175	0.582168	0.89932	protein_coding	Prosalpha7	NA
FBgn0023177	0.00212075	0.0261396	protein_coding	Pp4-19C	3
FBgn0023179	0.424332	0.808842	protein_coding	amon	NA
FBgn0023180	0.377258	0.766792	protein_coding	Orc6	NA
FBgn0023181	0.599138	0.906919	protein_coding	Orc4	NA
FBgn0023197	0.160604	0.513144	protein_coding	Jon74E	NA
FBgn0023212	1.42142e-05	0.000401927	protein_coding	EloB	5
FBgn0023213	0.317596	0.717763	protein_coding	eIF4G1	NA
FBgn0023214	0.000151958	0.00307562	protein_coding	edl	1
FBgn0023215	0.687573	0.944401	protein_coding	Mnt	NA
FBgn0023216	0.580961	0.89898	protein_coding	Parg	NA
FBgn0023388	0.283543	0.676612	protein_coding	Dap160	NA
FBgn0023395	0.0130248	0.0981462	protein_coding	Chd3	1
FBgn0023407	0.965187	0.999487	protein_coding	B4	NA
FBgn0023416	0.0758833	0.333581	protein_coding	Ac3	NA
FBgn0023441	0.346242	0.742036	protein_coding	fus	NA
FBgn0023458	0.86545	0.988254	protein_coding	Rbcn-3A	NA
FBgn0023477	0.140967	0.477463	protein_coding	Taldo	NA
FBgn0023479	0.00173413	0.0221996	protein_coding	teq	7
FBgn0023495	0.0136719	0.1015	protein_coding	Lip3	NA
FBgn0023496	0.451643	0.827187	protein_coding	Lip1	NA
FBgn0023506	0.556362	0.888638	protein_coding	Es2	NA
FBgn0023507	0.0441701	0.235918	protein_coding	D2hgdh	NA
FBgn0023508	0.944864	0.999487	protein_coding	Ocrl	NA
FBgn0023509	0.833764	0.981776	protein_coding	mip130	NA
FBgn0023510	0.875276	0.990337	protein_coding	Rbcn-3B	NA
FBgn0023511	0.274964	0.669654	protein_coding	Edem1	NA
FBgn0023512	0.662677	0.933682	protein_coding	eIF2Bepsilon	NA
FBgn0023513	0.943152	0.999487	protein_coding	CG14803	NA
FBgn0023514	0.83672	0.98241	protein_coding	CG14805	NA
FBgn0023515	0.425838	0.810276	protein_coding	CG14814	NA
FBgn0023516	0.0688716	0.314701	protein_coding	Pex5	NA
FBgn0023517	0.365851	0.757403	protein_coding	Pgam5	NA
FBgn0023518	0.753397	0.961269	protein_coding	trr	NA
FBgn0023519	0.979688	0.999487	protein_coding	mRpL16	NA
FBgn0023520	0.2425	0.629404	protein_coding	CG3857	NA
FBgn0023521	0.73644	0.954196	protein_coding	CG3587	NA
FBgn0023522	0.146896	0.487351	protein_coding	CG11596	NA
FBgn0023525	0.233072	0.618652	protein_coding	CG3191	NA
FBgn0023526	0.0659175	0.305854	protein_coding	CG2865	NA
FBgn0023527	0.103924	0.396792	protein_coding	CG3071	NA
FBgn0023528	0.96595	0.999487	protein_coding	CG2924	NA
FBgn0023529	0.439802	0.819905	protein_coding	CG2918	NA
FBgn0023530	0.0385448	0.215197	protein_coding	CG3740	NA
FBgn0023531	0.593219	0.903496	protein_coding	CG32809	NA
FBgn0023534	0.249874	0.641295	protein_coding	CG17778	NA
FBgn0023535	0.53276	0.875698	protein_coding	arg	NA
FBgn0023536	0.998079	0.999487	protein_coding	CG3156	NA
FBgn0023537	0.0437657	0.23467	protein_coding	CG17896	NA
FBgn0023540	0.335194	0.734401	protein_coding	CG3630	NA
FBgn0023541	0.000153069	0.00309161	protein_coding	Cyp4d14	2
FBgn0023542	0.671317	0.939316	protein_coding	Nmd3	NA
FBgn0023545	0.0185381	0.127213	protein_coding	PIG-K	NA
FBgn0023549	0.000797512	0.0119989	protein_coding	Mct1	5
FBgn0023550	0.032717	0.191211	protein_coding	FarO	NA
FBgn0024150	0.747555	0.959663	protein_coding	Ac78C	NA
FBgn0024179	0.297889	0.695933	protein_coding	wit	NA
FBgn0024182	0.00172592	0.0221266	protein_coding	waw	6
FBgn0024183	0.289924	0.684678	protein_coding	vig	NA
FBgn0024187	0.409824	0.798058	protein_coding	syd	NA
FBgn0024188	0.734459	0.954196	protein_coding	san	NA
FBgn0024189	0.0687964	0.314701	protein_coding	sns	NA
FBgn0024191	0.631675	0.920139	protein_coding	sip1	NA
FBgn0024194	0.0291653	0.175576	protein_coding	rasp	NA
FBgn0024196	0.0245867	0.156437	protein_coding	robl	NA
FBgn0024222	0.525298	0.872233	protein_coding	IKKbeta	NA
FBgn0024227	0.000536862	0.00864554	protein_coding	aurB	1
FBgn0024230	0.97709	0.999487	protein_coding	Hs2st	NA
FBgn0024232	0.0380153	0.21373	protein_coding	gprs	NA
FBgn0024234	0.130843	0.454903	protein_coding	gbb	NA
FBgn0024236	0.635226	0.921484	protein_coding	foi	NA
FBgn0024238	0.00189137	0.0237695	protein_coding	Fim	1
FBgn0024244	0.311603	0.711279	protein_coding	drm	NA
FBgn0024245	0.947687	0.999487	protein_coding	dnt	NA
FBgn0024248	0.800561	0.974993	protein_coding	chico	NA
FBgn0024250	0.306922	0.70592	protein_coding	brk	NA
FBgn0024251	0.233682	0.619441	protein_coding	bbx	NA
FBgn0024273	0.576006	0.894931	protein_coding	WASp	NA
FBgn0024277	0.544535	0.881453	protein_coding	trio	NA
FBgn0024285	0.170769	0.53111	protein_coding	Srp54	NA
FBgn0024288	1.3736e-07	7.21627e-06	protein_coding	Sox100B	1
FBgn0024289	0.0058925	0.0559788	protein_coding	Sodh-1	5
FBgn0024291	0.870259	0.989055	protein_coding	Sirt1	NA
FBgn0024293	0.273701	0.668877	protein_coding	Spn43Ab	NA
FBgn0024314	0.306238	0.70519	protein_coding	Plap	NA
FBgn0024315	0.0548113	0.270864	protein_coding	Picot	NA
FBgn0024319	0.0185178	0.127164	protein_coding	Nach	NA
FBgn0024320	0.223474	0.60643	protein_coding	Npc1a	NA
FBgn0024321	0.0198593	0.133143	protein_coding	NK7.1	NA
FBgn0024326	0.992786	0.999487	protein_coding	Mkk4	NA
FBgn0024329	0.535602	0.878117	protein_coding	Mekk1	NA
FBgn0024330	0.342797	0.738109	protein_coding	MED6	NA
FBgn0024352	0.47889	0.843674	protein_coding	Stip1	NA
FBgn0024360	0.517462	0.868519	protein_coding	MTPAP	NA
FBgn0024361	0.0454517	0.240359	protein_coding	Tsp2A	NA
FBgn0024362	0.978494	0.999487	protein_coding	Naa30A	NA
FBgn0024364	0.0602111	0.287188	protein_coding	CG11417	NA
FBgn0024365	0.749553	0.960301	protein_coding	CG12773	NA
FBgn0024366	0.601074	0.907016	protein_coding	CG11409	NA
FBgn0024371	0.942389	0.999487	protein_coding	E2f2	NA
FBgn0024432	7.58275e-09	5.44864e-07	protein_coding	Dlc90F	1
FBgn0024491	0.636787	0.922237	protein_coding	Bin1	NA
FBgn0024509	0.431706	0.813487	protein_coding	Sec13	NA
FBgn0024510	0.182607	0.548452	protein_coding	dlt	NA
FBgn0024542	0.940568	0.999487	protein_coding	Neos	NA
FBgn0024555	0.663572	0.934053	protein_coding	flfl	NA
FBgn0024556	0.87469	0.990337	protein_coding	mEFTu1	NA
FBgn0024558	0.704896	0.948151	protein_coding	Dph5	NA
FBgn0024689	0.726225	0.952839	protein_coding	fws	NA
FBgn0024698	0.992982	0.999487	protein_coding	Cpsf160	NA
FBgn0024728	0.90929	0.996849	protein_coding	Slip1	NA
FBgn0024732	0.977973	0.999487	protein_coding	Drep1	NA
FBgn0024733	0.391847	0.779801	protein_coding	RpL10	NA
FBgn0024734	0.406794	0.794877	protein_coding	PRL-1	NA
FBgn0024754	0.630713	0.919864	protein_coding	Flo1	NA
FBgn0024804	0.908493	0.996765	protein_coding	Dbp80	NA
FBgn0024806	0.565188	0.893188	protein_coding	DIP2	NA
FBgn0024807	0.363105	0.754691	protein_coding	DIP1	NA
FBgn0024811	0.676535	0.94073	protein_coding	Crk	NA
FBgn0024814	0.474443	0.841963	protein_coding	Clc	NA
FBgn0024833	0.604309	0.907761	protein_coding	AP-1mu	NA
FBgn0024841	0.894226	0.993654	protein_coding	Pcd	NA
FBgn0024846	0.77284	0.967584	protein_coding	p38b	NA
FBgn0024887	0.822361	0.979092	protein_coding	kin17	NA
FBgn0024889	0.117705	0.428316	protein_coding	Kap-alpha1	NA
FBgn0024909	0.890218	0.993343	protein_coding	Taf7	NA
FBgn0024912	0.86152	0.986591	protein_coding	agt	NA
FBgn0024913	0.856478	0.985686	protein_coding	Actbeta	NA
FBgn0024920	3.41102e-06	0.000119685	protein_coding	Ts	1
FBgn0024921	0.966548	0.999487	protein_coding	Tnpo	NA
FBgn0024945	0.141547	0.478273	protein_coding	NitFhit	NA
FBgn0024947	0.121092	0.435441	protein_coding	NTPase	NA
FBgn0024956	0.355837	0.750223	protein_coding	Mat1	NA
FBgn0024957	0.0290518	0.175002	protein_coding	Irp-1B	NA
FBgn0024958	0.70388	0.948039	protein_coding	Irp-1A	NA
FBgn0024973	0.956183	0.999487	protein_coding	CG2701	NA
FBgn0024975	0.759984	0.964241	protein_coding	CG2712	NA
FBgn0024980	0.689925	0.944998	protein_coding	Syx4	NA
FBgn0024983	0.560589	0.890092	protein_coding	CG4293	NA
FBgn0024985	0.701829	0.947083	protein_coding	Rilpl	NA
FBgn0024986	0.0178802	0.124566	protein_coding	CG3719	NA
FBgn0024987	0.57335	0.894931	protein_coding	ssx	NA
FBgn0024989	0.966904	0.999487	protein_coding	CG3777	NA
FBgn0024991	0.820061	0.978944	protein_coding	CG2694	NA
FBgn0024992	0.418702	0.805113	protein_coding	Spg7	NA
FBgn0024993	0.491816	0.851426	protein_coding	CG2662	NA
FBgn0024994	6.48248e-05	0.00148035	protein_coding	Ugalt	2
FBgn0024995	0.00142706	0.0190287	protein_coding	CG2680	4
FBgn0024996	0.81608	0.977547	protein_coding	eIF2Bbeta	NA
FBgn0024997	0.00963125	0.0798678	protein_coding	CG2681	6
FBgn0024998	0.382806	0.771291	protein_coding	CG2685	NA
FBgn0025109	0.978082	0.999487	protein_coding	Bem46	NA
FBgn0025111	0.106065	0.402095	protein_coding	Ant2	NA
FBgn0025185	0.820439	0.978944	protein_coding	az2	NA
FBgn0025186	0.87339	0.990001	protein_coding	ari-2	NA
FBgn0025335	0.368052	0.758999	protein_coding	Cpes	NA
FBgn0025336	0.938666	0.999487	protein_coding	CG4882	NA
FBgn0025352	0.456273	0.830572	protein_coding	Mtpbeta	NA
FBgn0025355	0.17974	0.544259	protein_coding	SuUR	NA
FBgn0025366	0.129561	0.453439	protein_coding	Ip259	NA
FBgn0025373	0.937485	0.999487	protein_coding	Fpps	NA
FBgn0025381	0.0394606	0.218533	protein_coding	rush	NA
FBgn0025383	0.0221307	0.145034	protein_coding	CG14780	NA
FBgn0025388	0.342774	0.738109	protein_coding	CG12179	NA
FBgn0025390	0.737518	0.955078	protein_coding	Mur2B	NA
FBgn0025391	0.831867	0.981695	protein_coding	Scgdelta	NA
FBgn0025394	0.96224	0.999487	protein_coding	inc	NA
FBgn0025454	0.508619	0.862409	protein_coding	Cyp6g1	NA
FBgn0025455	0.166752	0.523328	protein_coding	CycT	NA
FBgn0025456	0.323554	0.723912	protein_coding	CREG	NA
FBgn0025457	0.188898	0.558846	protein_coding	Bub3	NA
FBgn0025463	0.567701	0.893873	protein_coding	Bap60	NA
FBgn0025469	0.435969	0.81688	protein_coding	slv	NA
FBgn0025519	0.912932	0.997034	protein_coding	fidipidine	NA
FBgn0025525	0.894857	0.993707	protein_coding	bab2	NA
FBgn0025549	0.864887	0.987951	protein_coding	unc-119	NA
FBgn0025558	0.547894	0.884227	protein_coding	CG4101	NA
FBgn0025571	0.188465	0.558846	protein_coding	SF1	NA
FBgn0025574	0.00444425	0.0453096	protein_coding	Pli	1
FBgn0025582	0.730013	0.952954	protein_coding	eIF3e	NA
FBgn0025592	0.125414	0.444264	protein_coding	Gk1	NA
FBgn0025595	0.00939984	0.0784893	protein_coding	AkhR	7
FBgn0025608	0.448917	0.827187	protein_coding	Faf2	NA
FBgn0025615	0.749302	0.960301	protein_coding	Torsin	NA
FBgn0025620	0.00913055	0.0767989	protein_coding	CG13360	6
FBgn0025621	0.757851	0.963014	protein_coding	CG16989	NA
FBgn0025624	0.45317	0.828382	protein_coding	CG4025	NA
FBgn0025625	0.453338	0.828382	protein_coding	Sik2	NA
FBgn0025626	0.847243	0.985072	protein_coding	CG4281	NA
FBgn0025627	0.857375	0.985686	protein_coding	CG4194	NA
FBgn0025628	0.373652	0.76448	protein_coding	CG4199	NA
FBgn0025629	0.623062	0.916023	protein_coding	CG4045	NA
FBgn0025630	0.190021	0.560915	protein_coding	Rtca	NA
FBgn0025631	0.23631	0.621542	protein_coding	moody	NA
FBgn0025632	0.331585	0.731327	protein_coding	CG4313	NA
FBgn0025633	0.634186	0.921007	protein_coding	CG13366	NA
FBgn0025634	0.876718	0.990576	protein_coding	CG13367	NA
FBgn0025635	0.502338	0.857924	protein_coding	CG17829	NA
FBgn0025637	2.65309e-07	1.269e-05	protein_coding	SkpA	3
FBgn0025638	0.780433	0.968842	protein_coding	Roc1a	NA
FBgn0025639	0.384078	0.77185	protein_coding	Hmt4-20	NA
FBgn0025640	0.391703	0.779675	protein_coding	CG13369	NA
FBgn0025641	0.390193	0.778375	protein_coding	DAAM	NA
FBgn0025642	0.00487931	0.048712	protein_coding	CG32812	3
FBgn0025643	0.0667324	0.308593	protein_coding	CG3588	NA
FBgn0025674	0.519155	0.868905	protein_coding	CycK	NA
FBgn0025676	0.459359	0.831847	protein_coding	CkIIalpha-i3	NA
FBgn0025678	0.00181826	0.023001	protein_coding	CaBP1	7
FBgn0025680	4.39301e-12	4.91098e-10	protein_coding	cry	2
FBgn0025681	0.145267	0.484595	protein_coding	CG3558	NA
FBgn0025682	0.695788	0.947026	protein_coding	scf	NA
FBgn0025683	0.0515019	0.261287	protein_coding	CG3164	NA
FBgn0025684	0.565053	0.893188	protein_coding	MFS18	NA
FBgn0025686	0.0293124	0.176351	protein_coding	Amnionless	NA
FBgn0025692	0.407205	0.79522	protein_coding	Lfg	NA
FBgn0025693	0.641079	0.923768	protein_coding	ZnT41F	NA
FBgn0025697	0.182411	0.548452	protein_coding	santa-maria	NA
FBgn0025700	0.110087	0.411667	protein_coding	CG5885	NA
FBgn0025702	0.453134	0.828382	protein_coding	Srpk79D	NA
FBgn0025709	3.62095e-08	2.16223e-06	protein_coding	CNT2	2
FBgn0025712	0.41289	0.80031	protein_coding	CG13920	NA
FBgn0025716	0.144468	0.483364	protein_coding	Bap55	NA
FBgn0025720	0.457267	0.830736	protein_coding	Ate1	NA
FBgn0025724	0.10391	0.396792	protein_coding	beta'COP	NA
FBgn0025725	0.760835	0.964241	protein_coding	alphaCOP	NA
FBgn0025726	1.47185e-17	2.83007e-15	protein_coding	unc-13	4
FBgn0025739	0.0908505	0.371059	protein_coding	pon	NA
FBgn0025740	0.978977	0.999487	protein_coding	PlexB	NA
FBgn0025741	0.716942	0.951178	protein_coding	PlexA	NA
FBgn0025742	0.484479	0.847485	protein_coding	mtm	NA
FBgn0025743	0.724791	0.952738	protein_coding	mbt	NA
FBgn0025777	0.0386368	0.215461	protein_coding	homer	NA
FBgn0025781	0.869153	0.988997	protein_coding	Cdc16	NA
FBgn0025790	0.771952	0.96734	protein_coding	TBPH	NA
FBgn0025800	0.976036	0.999487	protein_coding	Smox	NA
FBgn0025802	0.982801	0.999487	protein_coding	Sbf	NA
FBgn0025807	0.804808	0.97587	protein_coding	Rad9	NA
FBgn0025808	0.582725	0.89932	protein_coding	Rad17	NA
FBgn0025809	0.901485	0.994611	protein_coding	Paf-AHalpha	NA
FBgn0025814	0.827709	0.979758	protein_coding	Mgstl	NA
FBgn0025815	0.00024149	0.00444767	protein_coding	Mcm6	1
FBgn0025820	0.519208	0.868905	protein_coding	JTBR	NA
FBgn0025825	0.807609	0.976196	protein_coding	HDAC3	NA
FBgn0025830	0.595627	0.904496	protein_coding	IntS8	NA
FBgn0025832	0.723829	0.952738	protein_coding	Fen1	NA
FBgn0025836	0.805958	0.97587	protein_coding	RhoGAP1A	NA
FBgn0025837	0.0139317	0.102479	protein_coding	CG17636	NA
FBgn0025839	0.872357	0.989365	protein_coding	ND-B14.5A	NA
FBgn0025864	0.224724	0.607128	protein_coding	Crag	NA
FBgn0025865	0.0582288	0.281312	protein_coding	Cortactin	NA
FBgn0025866	0.0802693	0.344097	protein_coding	CalpB	NA
FBgn0025874	0.0970633	0.382444	protein_coding	Meics	NA
FBgn0025879	0.0314304	0.185838	protein_coding	Timp	NA
FBgn0025885	0.105362	0.400036	protein_coding	Inos	NA
FBgn0025936	0.768847	0.965478	protein_coding	Eph	NA
FBgn0026015	0.382333	0.771039	protein_coding	Top3beta	NA
FBgn0026056	0.793187	0.972608	protein_coding	Rlip	NA
FBgn0026059	0.683792	0.944279	protein_coding	Mhcl	NA
FBgn0026060	0.701067	0.947083	protein_coding	Mipp2	NA
FBgn0026061	0.00170955	0.0220021	protein_coding	Mipp1	5
FBgn0026076	0.866559	0.988254	protein_coding	UBL3	NA
FBgn0026077	0.325686	0.725919	protein_coding	Gasp	NA
FBgn0026079	0.570199	0.894648	protein_coding	Nsun2	NA
FBgn0026080	0.91482	0.997454	protein_coding	Tip60	NA
FBgn0026083	0.986228	0.999487	protein_coding	tyf	NA
FBgn0026084	0.00385317	0.0407978	protein_coding	cib	1
FBgn0026085	0.486857	0.849791	protein_coding	dgt4	NA
FBgn0026086	0.846705	0.985022	protein_coding	Adar	NA
FBgn0026088	0.509375	0.863236	protein_coding	CG14818	NA
FBgn0026089	0.854859	0.985686	protein_coding	CG14817	NA
FBgn0026090	0.224361	0.606964	protein_coding	CG14812	NA
FBgn0026143	0.856997	0.985686	protein_coding	Cdc45	NA
FBgn0026144	0.653194	0.930519	protein_coding	CBP	NA
FBgn0026147	0.21705	0.597914	protein_coding	TTLL4A	NA
FBgn0026148	0.973179	0.999487	protein_coding	CG12253	NA
FBgn0026149	0.677867	0.941493	protein_coding	BCL7-like	NA
FBgn0026150	0.662221	0.933682	protein_coding	ApepP	NA
FBgn0026160	0.442071	0.821905	protein_coding	tna	NA
FBgn0026179	0.0966004	0.381569	protein_coding	siz	NA
FBgn0026181	0.118182	0.428917	protein_coding	Rok	NA
FBgn0026189	0.0527063	0.26474	protein_coding	promL	NA
FBgn0026192	0.444252	0.823161	protein_coding	par-6	NA
FBgn0026196	0.401144	0.789695	protein_coding	nop5	NA
FBgn0026197	0.715779	0.95114	ncRNA	lncRNA:noe	NA
FBgn0026199	0.811187	0.976417	protein_coding	myo	NA
FBgn0026206	0.00113718	0.0157307	protein_coding	mei-P26	5
FBgn0026207	0.341967	0.738109	protein_coding	mbo	NA
FBgn0026238	0.729565	0.952954	protein_coding	gus	NA
FBgn0026239	0.280432	0.67539	protein_coding	gukh	NA
FBgn0026250	0.119794	0.432806	protein_coding	eIF1A	NA
FBgn0026252	0.00290547	0.0330179	protein_coding	msk	5
FBgn0026255	0.657551	0.932403	protein_coding	clumsy	NA
FBgn0026257	0.0702305	0.319242	protein_coding	cav	NA
FBgn0026259	0.983908	0.999487	protein_coding	eIF5B	NA
FBgn0026261	0.347601	0.743954	protein_coding	bonsai	NA
FBgn0026262	0.938317	0.999487	protein_coding	bip2	NA
FBgn0026263	0.609455	0.909268	protein_coding	bip1	NA
FBgn0026309	0.61525	0.91267	protein_coding	aft	NA
FBgn0026313	0.804711	0.97587	protein_coding	X11L	NA
FBgn0026314	0.0411347	0.224397	protein_coding	Ugt35B1	NA
FBgn0026315	0.0533982	0.267151	protein_coding	Ugt35A1	NA
FBgn0026316	0.814519	0.977143	protein_coding	Ubc10	NA
FBgn0026317	0.57867	0.896525	protein_coding	Tsc1	NA
FBgn0026319	0.00648659	0.0597911	protein_coding	Traf4	3
FBgn0026323	0.528721	0.873191	protein_coding	Tak1	NA
FBgn0026324	0.818632	0.978531	protein_coding	Taf10b	NA
FBgn0026326	0.902775	0.99507	protein_coding	Mad1	NA
FBgn0026361	0.0912161	0.371533	protein_coding	2005-09-01	NA
FBgn0026369	0.42882	0.811958	protein_coding	Sara	NA
FBgn0026370	0.728278	0.952954	NA	NA	NA
FBgn0026371	0.225131	0.60764	protein_coding	SAK	NA
FBgn0026372	0.151151	0.496131	protein_coding	RpL23A	NA
FBgn0026373	0.93887	0.999487	protein_coding	RpII33	NA
FBgn0026374	0.859707	0.985833	protein_coding	Rhp	NA
FBgn0026375	0.795816	0.973318	protein_coding	RhoGAPp190	NA
FBgn0026376	0.818033	0.978226	protein_coding	Rgl	NA
FBgn0026378	0.200322	0.578001	protein_coding	Rep	NA
FBgn0026379	0.439012	0.819327	protein_coding	Pten	NA
FBgn0026380	0.236856	0.621804	protein_coding	Prosbeta3	NA
FBgn0026393	0.340568	0.737872	protein_coding	Or43b	NA
FBgn0026400	0.904163	0.99507	protein_coding	Noa36	NA
FBgn0026401	0.946939	0.999487	protein_coding	Nipped-B	NA
FBgn0026402	0.635207	0.921484	protein_coding	NiPp1	NA
FBgn0026403	1.2554e-05	0.000360154	protein_coding	Ndg	2
FBgn0026404	0.0105073	0.0845445	protein_coding	Dronc	3
FBgn0026409	0.22498	0.607401	protein_coding	Mpcp2	NA
FBgn0026415	3.64794e-06	0.000125704	protein_coding	Idgf4	6
FBgn0026417	0.760062	0.964241	protein_coding	Hus1-like	NA
FBgn0026418	0.859275	0.985686	protein_coding	Hsc70Cb	NA
FBgn0026427	0.778014	0.968677	protein_coding	Su(var)2-HP2	NA
FBgn0026428	0.215718	0.597108	protein_coding	HDAC6	NA
FBgn0026430	0.342029	0.738109	protein_coding	Grip84	NA
FBgn0026431	0.211541	0.59238	protein_coding	Grip75	NA
FBgn0026432	0.410452	0.798317	protein_coding	Grip163	NA
FBgn0026433	0.51667	0.867948	protein_coding	Grip128	NA
FBgn0026438	0.592025	0.903051	protein_coding	Eaat2	NA
FBgn0026439	0.182869	0.548551	protein_coding	Eaat1	NA
FBgn0026441	0.800007	0.974993	protein_coding	ear	NA
FBgn0026479	0.155218	0.503635	protein_coding	Drp1	NA
FBgn0026533	0.117103	0.426611	protein_coding	Dek	NA
FBgn0026562	0.450367	0.827187	protein_coding	SPARC	NA
FBgn0026563	1.08395e-05	0.000320625	protein_coding	CG1979	5
FBgn0026565	0.00174871	0.0223269	protein_coding	Ass	5
FBgn0026566	0.804222	0.97587	protein_coding	CG1307	NA
FBgn0026570	0.00060476	0.00946932	protein_coding	CG5704	3
FBgn0026573	0.325284	0.725418	protein_coding	ADD1	NA
FBgn0026575	3.33586e-71	6.41419e-68	protein_coding	hang	6
FBgn0026576	0.724755	0.952738	protein_coding	Pisd	NA
FBgn0026577	0.881347	0.991142	protein_coding	CG8677	NA
FBgn0026582	0.466619	0.836643	protein_coding	Hmg-2	NA
FBgn0026592	0.186657	0.555407	protein_coding	Fie	NA
FBgn0026593	0.212559	0.593403	protein_coding	CG5707	NA
FBgn0026597	0.709157	0.949264	protein_coding	Axn	NA
FBgn0026598	0.827619	0.979758	protein_coding	Apc2	NA
FBgn0026602	0.0998166	0.388203	protein_coding	Ady43A	NA
FBgn0026616	0.64805	0.927768	protein_coding	alpha-Man-IIb	NA
FBgn0026619	0.241012	0.626919	protein_coding	Taz	NA
FBgn0026620	0.0774867	0.33739	protein_coding	tacc	NA
FBgn0026630	0.539042	0.878474	protein_coding	nes	NA
FBgn0026634	0.288163	0.682364	protein_coding	Cog2	NA
FBgn0026666	0.181581	0.547402	protein_coding	MagR	NA
FBgn0026679	0.283034	0.676612	protein_coding	IntS4	NA
FBgn0026702	0.0960424	0.380763	protein_coding	Pop1	NA
FBgn0026713	0.413922	0.800747	protein_coding	l(1)G0007	NA
FBgn0026718	0.396154	0.784476	protein_coding	Agpat2	NA
FBgn0026721	0.104973	0.399528	protein_coding	fat-spondin	NA
FBgn0026722	0.655825	0.931795	protein_coding	drosha	NA
FBgn0026737	0.274936	0.669654	protein_coding	CG6171	NA
FBgn0026738	0.812443	0.977021	protein_coding	CG7857	NA
FBgn0026741	0.719423	0.951773	protein_coding	mRpL18	NA
FBgn0026749	0.938231	0.999487	protein_coding	Yippee	NA
FBgn0026751	0.127874	0.450537	protein_coding	XRCC1	NA
FBgn0026755	0.00954994	0.0793474	protein_coding	Ugt37B1	6
FBgn0026756	0.19706	0.571985	protein_coding	Ugt37A1	NA
FBgn0026760	0.763768	0.964681	protein_coding	Tehao	NA
FBgn0026761	0.304978	0.7043	protein_coding	Trap1	NA
FBgn0026777	0.329951	0.729802	protein_coding	Rad23	NA
FBgn0026778	0.606465	0.90861	protein_coding	Rad1	NA
FBgn0026787	0.142626	0.480115	protein_coding	Nhe1	NA
FBgn0026869	0.817787	0.978226	protein_coding	Thd1	NA
FBgn0026872	0.902786	0.99507	protein_coding	CG14777	NA
FBgn0026873	0.938039	0.999487	protein_coding	MED18	NA
FBgn0026876	0.0996295	0.387946	protein_coding	CG11403	NA
FBgn0026878	0.784331	0.969983	protein_coding	CG4325	NA
FBgn0026879	0.619696	0.914952	protein_coding	CG13364	NA
FBgn0027052	0.472241	0.840597	protein_coding	STUB1	NA
FBgn0027053	0.980598	0.999487	protein_coding	CSN5	NA
FBgn0027054	0.691421	0.945786	protein_coding	CSN4	NA
FBgn0027055	0.0547815	0.270864	protein_coding	CSN3	NA
FBgn0027057	0.983711	0.999487	protein_coding	CSN1b	NA
FBgn0027066	0.00883009	0.0749933	protein_coding	Eb1	1
FBgn0027070	0.194422	0.569001	protein_coding	Ugt36E1	NA
FBgn0027073	0.00323965	0.0358788	protein_coding	Ugt49B1	6
FBgn0027079	0.976241	0.999487	protein_coding	ValRS	NA
FBgn0027080	0.756364	0.962124	protein_coding	TyrRS	NA
FBgn0027081	0.0600633	0.286767	protein_coding	ThrRS	NA
FBgn0027082	0.814458	0.977143	protein_coding	ProRS-m	NA
FBgn0027083	0.00509403	0.0501269	protein_coding	MetRS-m	1
FBgn0027084	0.275862	0.671027	protein_coding	LysRS	NA
FBgn0027085	0.491382	0.851426	protein_coding	LeuRS-m	NA
FBgn0027086	0.766617	0.964764	protein_coding	IleRS	NA
FBgn0027087	0.994475	0.999487	protein_coding	HisRS	NA
FBgn0027088	0.89309	0.993549	protein_coding	GlyRS	NA
FBgn0027090	0.857704	0.985686	protein_coding	GlnRS	NA
FBgn0027091	0.000195368	0.00373413	protein_coding	CysRS	3
FBgn0027093	0.363083	0.754691	protein_coding	ArgRS	NA
FBgn0027094	0.430712	0.81296	protein_coding	AlaRS	NA
FBgn0027095	0.0110943	0.0879309	protein_coding	Manf	7
FBgn0027101	0.109068	0.40928	protein_coding	Dyrk3	NA
FBgn0027106	0.75787	0.963014	protein_coding	Inx7	NA
FBgn0027108	0.0545727	0.270305	protein_coding	Inx2	NA
FBgn0027109	0.0538809	0.268539	protein_coding	NPF	NA
FBgn0027111	0.216288	0.597418	protein_coding	miple1	NA
FBgn0027259	0.562328	0.891086	protein_coding	Kmn1	NA
FBgn0027279	0.225499	0.608119	protein_coding	l(1)G0196	NA
FBgn0027280	1.00104e-05	0.000298186	protein_coding	l(1)G0193	4
FBgn0027287	0.596673	0.905225	protein_coding	Gmap	NA
FBgn0027291	0.724416	0.952738	protein_coding	Idh3a	NA
FBgn0027296	0.646387	0.92645	protein_coding	temp	NA
FBgn0027329	0.261582	0.655422	protein_coding	CCT6	NA
FBgn0027330	0.220945	0.602772	protein_coding	l(1)G0020	NA
FBgn0027334	0.580017	0.897807	protein_coding	l(1)G0004	NA
FBgn0027335	0.288805	0.683547	protein_coding	Rip11	NA
FBgn0027338	0.871272	0.989301	protein_coding	Kap-alpha3	NA
FBgn0027339	0.426265	0.810276	protein_coding	jim	NA
FBgn0027341	0.195366	0.570204	NA	NA	NA
FBgn0027342	0.573938	0.894931	protein_coding	fz4	NA
FBgn0027343	0.16057	0.513144	protein_coding	fz3	NA
FBgn0027348	0.27916	0.673586	protein_coding	bgm	NA
FBgn0027356	0.0114156	0.0898645	protein_coding	Amph	6
FBgn0027358	0.471554	0.840164	protein_coding	Tim9b	NA
FBgn0027359	0.981708	0.999487	protein_coding	Tim8	NA
FBgn0027360	0.634807	0.921484	protein_coding	Tim10	NA
FBgn0027363	0.49554	0.85316	protein_coding	Stam	NA
FBgn0027375	0.980183	0.999487	protein_coding	RecQ5	NA
FBgn0027378	0.57036	0.894648	protein_coding	MRG15	NA
FBgn0027453	0.0923743	0.373771	protein_coding	Dnz1	NA
FBgn0027490	0.679444	0.942299	protein_coding	D12	NA
FBgn0027492	0.769323	0.965696	protein_coding	wdb	NA
FBgn0027493	0.0167429	0.118794	protein_coding	AdSS	NA
FBgn0027495	0.940747	0.999487	protein_coding	Smyd4-4	NA
FBgn0027496	0.0181142	0.12574	protein_coding	epsilonCOP	NA
FBgn0027497	0.298063	0.696036	protein_coding	Madm	NA
FBgn0027498	0.416455	0.802413	protein_coding	CG2061	NA
FBgn0027499	0.33374	0.732643	protein_coding	wde	NA
FBgn0027500	4.09077e-08	2.4128e-06	protein_coding	spd-2	1
FBgn0027503	0.401818	0.789715	protein_coding	CG11970	NA
FBgn0027504	0.762245	0.964599	protein_coding	CG8878	NA
FBgn0027505	0.406231	0.794683	protein_coding	Rab3-GAP	NA
FBgn0027506	0.721739	0.952128	protein_coding	EDTP	NA
FBgn0027507	0.977378	0.999487	protein_coding	CG1344	NA
FBgn0027508	0.928465	0.999487	protein_coding	Tnks	NA
FBgn0027509	0.943206	0.999487	protein_coding	TBCD	NA
FBgn0027512	0.393172	0.780821	protein_coding	CG10254	NA
FBgn0027513	0.481131	0.84509	protein_coding	ana2	NA
FBgn0027514	0.39407	0.781628	protein_coding	CG1024	NA
FBgn0027515	0.968612	0.999487	protein_coding	CG7115	NA
FBgn0027518	0.840078	0.982935	protein_coding	Wdr24	NA
FBgn0027521	0.708978	0.949264	protein_coding	CG3679	NA
FBgn0027524	0.794999	0.972874	protein_coding	CG3909	NA
FBgn0027525	0.0231387	0.150105	protein_coding	LTV1	NA
FBgn0027526	0.451381	0.827187	protein_coding	Ublcp1	NA
FBgn0027528	0.0104292	0.084187	protein_coding	goe	5
FBgn0027529	0.562606	0.891086	protein_coding	tapas	NA
FBgn0027532	0.70332	0.947842	protein_coding	CG7139	NA
FBgn0027535	0.559708	0.889963	protein_coding	botv	NA
FBgn0027537	0.115597	0.42418	protein_coding	Nup93-1	NA
FBgn0027538	5.64086e-07	2.4539e-05	protein_coding	beta4GalNAcTA	7
FBgn0027539	0.0501717	0.256433	protein_coding	lili	NA
FBgn0027547	0.0788949	0.341132	protein_coding	CG1927	NA
FBgn0027548	0.720065	0.951968	protein_coding	nito	NA
FBgn0027549	0.971784	0.999487	protein_coding	Nulp1	NA
FBgn0027550	0.271085	0.666551	protein_coding	CG6495	NA
FBgn0027552	0.00336925	0.0369277	protein_coding	CG10863	2
FBgn0027553	0.156789	0.5061	protein_coding	NELF-B	NA
FBgn0027554	0.0264265	0.163701	protein_coding	CG8042	NA
FBgn0027556	1.16949e-05	0.000337643	protein_coding	CG4928	6
FBgn0027558	2.53115e-05	0.000672222	protein_coding	Pgant3	1
FBgn0027560	0.317535	0.717763	protein_coding	Tps1	NA
FBgn0027561	0.155998	0.504803	protein_coding	CG18659	NA
FBgn0027562	0.0589188	0.284075	protein_coding	CG10345	NA
FBgn0027563	0.0815172	0.346598	protein_coding	CG9631	NA
FBgn0027564	0.565388	0.893188	protein_coding	CG3149	NA
FBgn0027565	0.240352	0.625709	protein_coding	CG5498	NA
FBgn0027567	0.0963945	0.381059	protein_coding	CG8108	NA
FBgn0027568	0.635902	0.92175	protein_coding	Cand1	NA
FBgn0027569	0.646799	0.92645	protein_coding	cert	NA
FBgn0027570	0.0150607	0.109183	protein_coding	Nep2	NA
FBgn0027572	0.000127147	0.0026288	protein_coding	CG5009	2
FBgn0027574	0.315962	0.716261	protein_coding	CG5815	NA
[truncated: 7,616 more rows]

## Sheet: OKSM vs. Control
gene_id	log2FoldChange	pvalue	padj	gene_biotype	external_gene_name
FBgn0051683	5.23548	4.35695e-88	2.09439e-84	protein_coding	CG31683
FBgn0053346	3.50884	1.12699e-102	1.08349e-98	protein_coding	CG33346
FBgn0002531	3.42636	1.79797e-25	1.92063e-22	protein_coding	Lcp1
FBgn0259108	3.37288	4.19211e-38	1.00757e-34	protein_coding	futsch
FBgn0052302	2.95087	5.36424e-32	7.3674e-29	protein_coding	CG32302
FBgn0003046	2.93294	2.25352e-15	9.84788e-13	protein_coding	Pcp
FBgn0031701	2.64397	1.43381e-13	5.74361e-11	protein_coding	TotM
FBgn0004426	2.23388	1.60816e-32	2.57681e-29	pseudogene	LysC
FBgn0037786	2.17095	5.18051e-19	3.55753e-16	protein_coding	Alp13
FBgn0036956	1.91675	1.10906e-15	5.33127e-13	protein_coding	CG13813
FBgn0032663	1.87653	1.65393e-13	6.11573e-11	protein_coding	CG15153
FBgn0052284	1.75092	1.73986e-09	3.6363e-07	protein_coding	CG32284
FBgn0264748	1.7087	6.80497e-13	2.42307e-10	protein_coding	CG44006
FBgn0004878	1.66991	2.26117e-07	2.86037e-05	protein_coding	cas
FBgn0011834	1.66753	1.65547e-12	5.48818e-10	protein_coding	Ser6
FBgn0032067	1.65089	7.41557e-12	2.1604e-09	protein_coding	LManIV
FBgn0004607	1.50849	7.64468e-07	8.54604e-05	protein_coding	zfh2
FBgn0036024	1.50545	9.31825e-14	3.89503e-11	protein_coding	CG18180
FBgn0031791	1.47954	9.14883e-13	3.14132e-10	protein_coding	AANATL2
FBgn0028490	1.46604	2.37702e-16	1.26959e-13	protein_coding	CG31705
FBgn0037238	1.45954	1.63493e-08	2.66411e-06	protein_coding	CG1090
FBgn0019928	1.43996	5.25656e-09	9.90914e-07	protein_coding	Ser8
FBgn0033458	1.43303	5.16469e-08	8.13989e-06	protein_coding	Lime
FBgn0034497	1.40489	6.43828e-09	1.19034e-06	protein_coding	Mpcp1
FBgn0264711	1.39182	1.13617e-07	1.60635e-05	protein_coding	CG43980
FBgn0038180	1.38377	2.29261e-07	2.86248e-05	protein_coding	Cht5
FBgn0033789	1.35722	1.22325e-09	2.73497e-07	protein_coding	CG13324
FBgn0030048	1.32089	1.71569e-18	1.03091e-15	protein_coding	CG12112
FBgn0033289	1.31288	8.38416e-08	1.20306e-05	protein_coding	CG2121
FBgn0002564	1.30212	1.63962e-05	0.00127123	protein_coding	Lsp1gamma
FBgn0052283	1.30013	2.88786e-05	0.0019974	protein_coding	Drsl3
FBgn0036831	1.29057	1.16975e-07	1.61859e-05	protein_coding	CG6839
FBgn0038020	1.28389	1.58252e-09	3.38098e-07	protein_coding	GstD9
FBgn0036833	1.26964	7.52609e-09	1.33719e-06	protein_coding	CG3819
FBgn0034582	1.26798	2.89121e-09	5.79085e-07	protein_coding	Cht9
FBgn0031970	1.26415	2.9926e-11	8.22025e-09	protein_coding	CG7227
FBgn0030218	1.2528	5.12286e-11	1.36809e-08	protein_coding	CG1628
FBgn0031461	1.23918	1.61636e-05	0.00126339	protein_coding	daw
FBgn0039472	1.22377	8.68972e-06	0.000752729	protein_coding	CG17192
FBgn0041182	1.1832	1.03357e-18	6.62451e-16	protein_coding	Tep2
FBgn0262567	1.1828	0.0001329	0.0067963	protein_coding	CG43107
FBgn0035282	1.16801	0.640033	0.982921	protein_coding	CNMa
FBgn0085244	1.15099	8.27784e-06	0.000736881	protein_coding	CG34215
FBgn0035666	1.14118	8.59667e-07	9.39186e-05	protein_coding	Jon65Aii
FBgn0050272	1.13201	9.41547e-06	0.000808217	protein_coding	MFS1
FBgn0036947	1.11834	0.000312453	0.0131419	protein_coding	obst-F
FBgn0033520	1.11499	2.4274e-05	0.00171822	protein_coding	Prx2540-1
FBgn0032821	1.11376	6.18723e-10	1.45083e-07	protein_coding	CdGAPr
FBgn0019661	1.10628	0.0675777	0.489999	ncRNA	lncRNA:roX1
FBgn0036023	1.09724	4.17018e-05	0.00260338	protein_coding	CG18179
FBgn0035620	1.08289	4.59846e-12	1.42611e-09	protein_coding	Alp9
FBgn0020508	1.08128	5.60232e-08	8.54932e-06	protein_coding	Ag5r2
FBgn0032494	1.07541	3.97277e-05	0.00253221	protein_coding	CG5945
FBgn0037563	1.07164	3.46614e-07	4.16544e-05	protein_coding	CG11672
FBgn0264987	1.06809	7.23588e-06	0.000656281	ncRNA	lncRNA:CR44138
FBgn0033108	1.06312	4.20464e-05	0.00260419	protein_coding	CG15236
FBgn0085345	1.0571	1.29326e-07	1.73402e-05	protein_coding	CG34316
FBgn0052279	1.0416	0.000350198	0.0141858	protein_coding	Drsl2
FBgn0032549	1.03723	4.22565e-05	0.00260419	protein_coding	CG4650
FBgn0003390	1.00932	1.94169e-06	0.000198589	protein_coding	shf
FBgn0266405	1.00576	0.000174579	0.00830892	protein_coding	CG45045
FBgn0032645	1.00463	0.000322274	0.0133256	protein_coding	CG15142
FBgn0265914	0.99804	0.000236827	0.0104443	ncRNA	asRNA:CR44703
FBgn0000357	0.9856	0.00167035	0.045882	protein_coding	Cp18
FBgn0053965	0.979717	1.84436e-06	0.000190664	protein_coding	CG33965
FBgn0042206	0.971957	3.51533e-09	6.75929e-07	protein_coding	GstD10
FBgn0001285	0.968973	1.33371e-05	0.00109592	protein_coding	Jon44E
FBgn0050265	0.966485	0.0016502	0.0454584	protein_coding	CG30265
FBgn0040609	0.965543	0.00213257	0.054239	protein_coding	CG3348
FBgn0031000	0.964999	0.00362408	0.0790067	protein_coding	Muc18B
FBgn0041709	0.958924	0.000266545	0.0115431	protein_coding	yellow-g
FBgn0267073	0.958244	7.60489e-05	0.00422621	ncRNA	lncRNA:CR45517
FBgn0034197	0.955812	0.000351178	0.0141858	protein_coding	Cda9
FBgn0037548	0.95236	1.44164e-07	1.89861e-05	protein_coding	CG7900
FBgn0038257	0.950913	4.14782e-05	0.00260338	protein_coding	smp-30
FBgn0035619	0.940019	8.315e-09	1.40246e-06	protein_coding	Alp10
FBgn0039736	0.930462	2.88401e-05	0.0019974	protein_coding	CG7912
FBgn0263093	0.908208	8.57477e-05	0.00468397	pseudogene	CR43361
FBgn0266001	0.905747	0.000588253	0.0212612	ncRNA	lncRNA:CR44775
FBgn0051792	0.899295	7.86154e-06	0.000706363	protein_coding	CG31792
FBgn0034860	0.887579	3.73186e-05	0.00244069	protein_coding	CG9812
FBgn0262357	0.887572	4.96901e-08	7.96202e-06	protein_coding	CG43055
FBgn0259229	0.88708	0.0027738	0.0648839	protein_coding	CG42329
FBgn0036232	0.885551	0.00017566	0.0083113	protein_coding	CG14125
FBgn0085736	0.873599	4.20544e-07	4.96182e-05	protein_coding	CG40472
FBgn0029898	0.858234	0.000412303	0.0159674	protein_coding	CG14439
FBgn0035844	0.856604	0.00140142	0.0408279	protein_coding	CG13676
FBgn0039642	0.850062	0.000273462	0.0117895	protein_coding	CG11882
FBgn0034470	0.844398	0.000796182	0.026764	protein_coding	Obp56d
FBgn0039315	0.843808	6.72072e-06	0.000615362	protein_coding	CG13658
FBgn0035607	0.840446	0.00229292	0.0569035	protein_coding	CG4835
FBgn0033592	0.838811	1.46849e-05	0.00118146	protein_coding	CG13215
FBgn0015010	0.838566	1.29633e-05	0.00107439	protein_coding	Ag5r
FBgn0050090	0.836709	3.97716e-05	0.00253221	protein_coding	CG30090
FBgn0036659	0.834777	1.80422e-05	0.00138766	protein_coding	CG9701
FBgn0002565	0.83225	0.01268	0.185549	protein_coding	Lsp2
FBgn0003358	0.829004	2.3823e-05	0.00171822	protein_coding	Jon99Ci
FBgn0086704	0.826945	5.75812e-05	0.00327566	protein_coding	stops
FBgn0265187	0.820723	0.00016827	0.00817044	protein_coding	Fatp2
FBgn0039591	0.815356	0.000922117	0.0296496	protein_coding	CG9988
FBgn0263748	0.810171	0.00134191	0.0393327	protein_coding	CG43673
FBgn0260874	0.802883	0.00171265	0.0464393	protein_coding	Ir76a
FBgn0004622	0.797722	6.06134e-05	0.00340782	protein_coding	TkR99D
FBgn0022774	0.797589	0.000173	0.00827473	protein_coding	Oat
FBgn0031689	0.797132	9.1635e-05	0.00492167	protein_coding	Cyp28d1
FBgn0034288	0.795643	0.00615042	0.113931	protein_coding	CG5084
FBgn0051176	0.794785	0.00179267	0.0476096	protein_coding	CG31176
FBgn0000078	0.793319	2.10982e-06	0.0002131	protein_coding	Amy-d
FBgn0051741	0.792784	0.000501441	0.0187108	protein_coding	CG31741
FBgn0039754	0.792085	0.00168736	0.0462173	protein_coding	CG9747
FBgn0032420	0.787748	0.00112739	0.0344087	protein_coding	CG6583
FBgn0039475	0.785251	0.000109693	0.00579447	protein_coding	CG6277
FBgn0032116	0.783358	5.63856e-05	0.00326616	protein_coding	Mco1
FBgn0032066	0.77707	0.00028043	0.0119295	protein_coding	LManIII
FBgn0039864	0.775965	0.0041276	0.0860796	protein_coding	CG11550
FBgn0035089	0.77578	0.00304352	0.0695022	protein_coding	Phk-3
FBgn0035667	0.772419	0.0146519	0.201521	protein_coding	Jon65Ai
FBgn0034289	0.767746	0.00118282	0.0358726	protein_coding	CG10910
FBgn0047351	0.766802	0.412656	0.934484	protein_coding	CG31468
FBgn0003486	0.765075	0.080093	0.530096	protein_coding	spo
FBgn0033981	0.757321	0.000584653	0.0212108	protein_coding	Cyp6a21
FBgn0028940	0.756723	1.4873e-07	1.93228e-05	protein_coding	Cyp28a5
FBgn0038739	0.755216	1.1785e-07	1.61859e-05	protein_coding	CG4686
FBgn0026403	0.754389	0.000141584	0.00720207	protein_coding	Ndg
FBgn0259992	0.753672	1.4755e-05	0.00118146	protein_coding	CG42489
FBgn0039319	0.751303	0.000170674	0.00824553	protein_coding	CG13659
FBgn0039470	0.743071	0.000969377	0.030556	protein_coding	CG6296
FBgn0033234	0.737894	0.000964256	0.0304946	protein_coding	MFS12
FBgn0032068	0.73641	0.00129792	0.0385113	protein_coding	LManV
FBgn0052557	0.735918	0.000541285	0.0198623	protein_coding	Mco4
FBgn0035941	0.733873	0.000514122	0.0190106	protein_coding	CG13313
FBgn0260390	0.731025	0.00608516	0.113121	protein_coding	CG42516
FBgn0015904	0.730188	0.00156859	0.0438385	protein_coding	ara
FBgn0036648	0.729309	0.000474297	0.0178121	protein_coding	CG4098
FBgn0036992	0.729215	0.0023706	0.0579922	protein_coding	Hpd
FBgn0025642	0.729177	0.0711421	0.502912	protein_coding	CG32812
FBgn0044812	0.727811	0.0205726	0.251634	protein_coding	TotC
FBgn0039098	0.727386	0.00547757	0.105327	protein_coding	GILT3
FBgn0038485	0.724026	0.0117367	0.176033	protein_coding	CG5255
FBgn0085380	0.722058	0.00357154	0.0785576	protein_coding	CG34351
FBgn0259748	0.720692	0.000316409	0.0131687	protein_coding	CG42397
FBgn0038431	0.718312	0.00094563	0.0302036	protein_coding	CG10405
FBgn0051619	0.715573	0.00589071	0.110828	protein_coding	nolo
FBgn0036022	0.714582	0.0221572	0.263201	protein_coding	CG8329
FBgn0032086	0.714076	0.00109742	0.0337081	protein_coding	CG17906
FBgn0085353	0.711783	0.00171479	0.0464393	protein_coding	CG34324
FBgn0028573	0.711136	0.0046736	0.0945936	protein_coding	prc
FBgn0030777	0.710553	8.0235e-05	0.00440788	protein_coding	CG9672
FBgn0027562	0.709674	0.00877873	0.144766	protein_coding	CG10345
FBgn0264945	0.707909	0.00513484	0.100739	ncRNA	asRNA:CR44114
FBgn0035815	0.705233	0.00513399	0.100739	protein_coding	Snmp2
FBgn0085486	0.7044	0.752216	0.986904	protein_coding	CG34457
FBgn0263974	0.703344	0.00976265	0.154881	protein_coding	qin
FBgn0036821	0.702727	3.10734e-05	0.00213386	protein_coding	CG3961
FBgn0028429	0.700594	3.22243e-10	7.94371e-08	protein_coding	I-2
FBgn0028562	0.700209	0.000365122	0.0145053	protein_coding	sut2
FBgn0034198	0.699386	0.000540242	0.0198623	protein_coding	CG11400
FBgn0259878	0.69912	0.00627515	0.115573	protein_coding	Fs
FBgn0010222	0.699053	0.000223037	0.00997337	protein_coding	Nmdmc
FBgn0035936	0.698412	0.00256395	0.0613181	protein_coding	Tsp66E
FBgn0266212	0.695129	0.0298411	0.311475	ncRNA	asRNA:CR44907
FBgn0036552	0.693369	2.78554e-06	0.000276085	protein_coding	CG17028
FBgn0031248	0.693179	0.0123481	0.182309	protein_coding	CG11912
FBgn0029768	0.692692	0.0133605	0.191796	protein_coding	SPR
FBgn0040360	0.692536	0.0138866	0.195395	protein_coding	CG14626
FBgn0051809	0.692461	0.000956936	0.030363	protein_coding	CG31809
FBgn0032478	0.684154	0.0110457	0.168027	protein_coding	Rsph1
FBgn0264550	0.683317	0.00767787	0.132523	ncRNA	lncRNA:CR43929
FBgn0032025	0.680694	5.49785e-06	0.00052333	protein_coding	CG7778
FBgn0028396	0.680215	0.094224	0.581058	protein_coding	TotA
FBgn0011576	0.678276	7.77316e-05	0.00429489	protein_coding	Cyp4d2
FBgn0016061	0.676309	0.0233578	0.269636	protein_coding	side
FBgn0030271	0.674639	0.00641482	0.117025	protein_coding	CG15202
FBgn0010041	0.673163	0.00130196	0.0385113	protein_coding	GstD5
FBgn0039323	0.672361	0.000176358	0.0083113	protein_coding	CG10559
FBgn0001612	0.67175	0.00136221	0.0398063	protein_coding	Grip91
FBgn0034871	0.667345	0.00482697	0.0963283	protein_coding	CG3906
FBgn0264746	0.661028	0.0139082	0.195395	protein_coding	CG44004
FBgn0033631	0.660174	3.27629e-05	0.00223392	protein_coding	Sod3
FBgn0033788	0.659245	1.34801e-05	0.00109829	protein_coding	CG13323
FBgn0029930	0.65749	0.0200585	0.247551	protein_coding	CG12541
FBgn0029648	0.657395	5.67349e-05	0.00326616	protein_coding	CG3603
FBgn0038207	0.657089	0.0232832	0.269636	protein_coding	CG14356
FBgn0035480	0.657028	0.0227842	0.266481	protein_coding	CG14984
FBgn0036319	0.655572	0.00287176	0.0663681	protein_coding	Ent3
FBgn0034782	0.652893	0.050502	0.418196	protein_coding	CG12490
FBgn0036203	0.652756	0.00482908	0.0963283	protein_coding	Muc68D
FBgn0033798	0.651019	0.000189124	0.00878376	protein_coding	CG15870
FBgn0032069	0.648731	0.00659081	0.118961	protein_coding	LManVI
FBgn0052512	0.646771	0.00376182	0.0812722	protein_coding	CG32512
FBgn0038973	0.646555	0.00594069	0.111369	protein_coding	Pebp1
FBgn0086558	0.645624	0.000744514	0.025655	protein_coding	Ubi-p5E
FBgn0000477	0.645075	0.00183521	0.0484718	protein_coding	DNaseII
FBgn0035358	0.643142	0.0228333	0.26673	protein_coding	CG14949
FBgn0039622	0.640653	0.0272584	0.295019	protein_coding	eIF4E6
FBgn0034318	0.639206	0.00299935	0.0687401	protein_coding	CG14500
FBgn0033652	0.639151	0.00995887	0.157216	protein_coding	ths
FBgn0036272	0.637944	3.12404e-09	6.1295e-07	protein_coding	Sms
FBgn0268063	0.637839	0.0209353	0.253491	protein_coding	ltl
FBgn0039474	0.637617	0.00131045	0.0385282	protein_coding	CG6283
FBgn0044872	0.63714	8.78598e-05	0.00477223	protein_coding	FucTC
FBgn0038660	0.635406	0.0188455	0.238395	protein_coding	Sgsh
FBgn0086368	0.634023	0.0188343	0.238395	protein_coding	tw
FBgn0023495	0.632671	0.029871	0.311475	protein_coding	Lip3
FBgn0036906	0.630809	0.00687407	0.123068	protein_coding	CG14102
FBgn0030883	0.628404	0.000379447	0.0148898	protein_coding	CG7772
FBgn0030098	0.628356	0.00840065	0.140949	protein_coding	CG12057
FBgn0261681	0.62786	0.0130894	0.189236	protein_coding	CG42728
FBgn0010425	0.627573	0.00726761	0.128193	protein_coding	epsilonTry
FBgn0032482	0.626054	0.00663462	0.119448	protein_coding	Pect
FBgn0035985	0.625047	0.0177846	0.231975	protein_coding	Cpr67B
FBgn0053087	0.623759	0.00130588	0.0385113	protein_coding	LRP1
FBgn0264341	0.621607	0.017102	0.22554	protein_coding	CG43797
FBgn0085232	0.621067	0.0209308	0.253491	protein_coding	CG34203
FBgn0034247	0.619767	0.000844077	0.027791	protein_coding	CG6484
FBgn0054026	0.618567	0.000322953	0.0133256	protein_coding	CG34026
FBgn0050151	0.618129	0.00755893	0.131572	protein_coding	CG30151
FBgn0053126	0.616418	0.00426148	0.0881072	protein_coding	NLaz
FBgn0259710	0.614978	0.0346129	0.33881	protein_coding	CG42364
FBgn0025383	0.613774	0.00782607	0.134819	protein_coding	CG14780
FBgn0031412	0.612188	0.0456629	0.392317	protein_coding	CG16995
FBgn0030310	0.611896	0.00730141	0.128193	protein_coding	PGRP-SA
FBgn0037906	0.611793	2.40297e-05	0.00171822	protein_coding	PGRP-LB
FBgn0083984	0.61066	0.0022016	0.0551497	protein_coding	CG34148
FBgn0005626	0.610302	0.00122624	0.036841	protein_coding	ple
FBgn0036927	0.608674	0.0532618	0.431457	protein_coding	Gabat
FBgn0053156	0.608463	0.00792277	0.135086	protein_coding	CG33156
FBgn0265901	0.602592	0.000984666	0.0309365	ncRNA	asRNA:CR44690
FBgn0033065	0.601553	0.87531	0.993748	protein_coding	Cyp6w1
FBgn0037975	0.599654	0.00153417	0.0432537	protein_coding	CG3397
FBgn0052029	0.598483	0.0512063	0.422573	protein_coding	Cpr66D
FBgn0033327	0.598163	0.0440447	0.384601	protein_coding	PGRP-SC1b
FBgn0039310	0.597728	0.00339888	0.0759926	protein_coding	CG11878
FBgn0039776	0.597439	0.000230581	0.010263	protein_coding	PH4alphaEFB
FBgn0039091	0.596126	0.0186724	0.238395	protein_coding	CG10182
FBgn0031835	0.595806	0.00584172	0.110338	protein_coding	CG11319
FBgn0262608	0.594876	0.0231646	0.268643	protein_coding	CG43134
FBgn0038079	0.593563	0.00247582	0.0599561	protein_coding	NijC
FBgn0036144	0.593	0.0121028	0.17984	protein_coding	GlcAT-P
FBgn0039807	0.592639	0.019552	0.243489	protein_coding	CG15546
FBgn0085265	0.590466	0.000220938	0.00992569	protein_coding	CG34236
FBgn0266629	0.589358	0.0361123	0.345092	ncRNA	asRNA:CR45136
FBgn0030882	0.589331	2.41114e-05	0.00171822	protein_coding	Gss1
FBgn0052495	0.589331	2.41114e-05	0.00171822	protein_coding	Gss2
FBgn0004003	0.585704	0.0317817	0.321631	protein_coding	wbl
FBgn0038975	0.58238	0.0151523	0.207218	protein_coding	Nrx-1
FBgn0031633	0.581914	6.04731e-06	0.000564454	protein_coding	Fnta
FBgn0000008	0.581291	0.0108176	0.16587	protein_coding	a
FBgn0033216	0.5809	9.75028e-05	0.00520773	protein_coding	CG1946
FBgn0000024	0.580518	0.000925818	0.0296694	protein_coding	Ace
FBgn0053192	0.578271	0.0091659	0.148602	protein_coding	MtnD
FBgn0038095	0.577934	0.0267752	0.292852	protein_coding	Cyp304a1
FBgn0040532	0.576791	0.0158422	0.213533	protein_coding	CG8369
FBgn0032076	0.575409	7.24061e-08	1.07094e-05	protein_coding	Argl
FBgn0037630	0.575328	0.0226222	0.26588	protein_coding	Ir85a
FBgn0037936	0.574733	0.00765037	0.13244	protein_coding	CG6908
FBgn0039821	0.573864	0.00622029	0.114783	protein_coding	CG15556
FBgn0023541	0.573637	0.00880977	0.144781	protein_coding	Cyp4d14
FBgn0032495	0.573623	0.0395345	0.359248	protein_coding	CG16820
FBgn0052187	0.572148	0.030862	0.316319	protein_coding	CG32187
FBgn0034605	0.570139	0.000758208	0.025941	protein_coding	Ugt49C1
FBgn0034390	0.569565	0.000677341	0.0239296	protein_coding	CG15093
FBgn0051075	0.569485	0.012708	0.185676	protein_coding	CG31075
FBgn0000053	0.568925	1.83018e-05	0.00139645	protein_coding	Gart
FBgn0263234	0.567453	0.000156117	0.0076577	protein_coding	Phae1
FBgn0036229	0.566684	0.0548074	0.438733	protein_coding	CG7248
FBgn0025680	0.565828	2.40896e-07	2.9692e-05	protein_coding	cry
FBgn0030929	0.56561	0.00233775	0.0574811	protein_coding	CG15043
FBgn0025637	0.564125	6.32028e-08	9.49425e-06	protein_coding	SkpA
FBgn0032839	0.5637	0.00332028	0.0747568	protein_coding	AANATL3
FBgn0264721	0.56349	0.033297	0.332417	ncRNA	lncRNA:CR43989
FBgn0026415	0.563026	3.8241e-05	0.00246843	protein_coding	Idgf4
FBgn0026570	0.561275	0.000330275	0.0135695	protein_coding	CG5704
FBgn0038460	0.560702	0.0101728	0.159026	protein_coding	CG18622
FBgn0034783	0.560326	0.359986	0.906734	protein_coding	CG9825
FBgn0262717	0.559289	0.0321303	0.322781	protein_coding	Skeletor
FBgn0022702	0.558714	0.00215796	0.0543105	protein_coding	Cht2
FBgn0031432	0.558393	0.019171	0.241244	protein_coding	Cyp309a1
FBgn0031654	0.557459	0.000390639	0.0152667	protein_coding	Jon25Bii
FBgn0010452	0.557048	0.0081484	0.13792	protein_coding	trn
FBgn0020906	0.556121	0.00150366	0.0428549	protein_coding	Jon25Bi
FBgn0032004	0.555271	0.0358105	0.343938	protein_coding	CG8292
FBgn0015039	0.554963	3.39573e-05	0.00225312	protein_coding	Cyp9b2
FBgn0032753	0.554891	0.0595054	0.458035	protein_coding	CG17572
FBgn0037468	0.554658	0.000263074	0.0114443	protein_coding	CG1943
FBgn0039620	0.553973	0.0263907	0.289635	protein_coding	wat
FBgn0035557	0.552667	0.0028338	0.0656485	protein_coding	CG11353
FBgn0266311	0.551319	0.0519718	0.425801	ncRNA	asRNA:CR44976
FBgn0284084	0.551062	0.0388104	0.356001	protein_coding	wg
FBgn0264863	0.550092	0.0244962	0.277409	ncRNA	asRNA:CR44054
FBgn0264775	0.549938	0.0565554	0.44531	protein_coding	CG44013
FBgn0031313	0.548166	0.00658549	0.118961	protein_coding	CG5080
FBgn0003068	0.546507	0.00185427	0.0486222	protein_coding	per
FBgn0028945	0.545778	0.0283092	0.301735	protein_coding	CG7631
FBgn0035211	0.544637	0.00331955	0.0747568	protein_coding	CG2211
FBgn0051163	0.543403	0.00103907	0.0322244	protein_coding	SKIP
FBgn0034909	0.541238	0.028728	0.304847	protein_coding	CG4797
FBgn0062978	0.540525	0.000593759	0.0213798	protein_coding	CG31808
FBgn0032082	0.539945	0.0345348	0.33881	protein_coding	CG18088
FBgn0011695	0.539775	0.0429957	0.378882	protein_coding	EbpIII
FBgn0029608	0.537705	2.32852e-05	0.00171822	protein_coding	CG3091
FBgn0044050	0.536998	0.0132155	0.190772	protein_coding	Ilp3
FBgn0263046	0.535341	0.0319896	0.322378	protein_coding	CG43341
FBgn0036529	0.535141	0.036146	0.345092	protein_coding	Pgant8
FBgn0030357	0.534394	0.0156534	0.21196	protein_coding	Sclp
FBgn0034784	0.533736	0.0866219	0.553712	protein_coding	CG9826
FBgn0038113	0.5325	0.0424955	0.377294	protein_coding	CG11668
FBgn0038530	0.532306	0.091539	0.571465	protein_coding	AttD
FBgn0052017	0.532175	0.00366518	0.0797217	protein_coding	CG32017
FBgn0036449	0.529864	0.0233185	0.269636	protein_coding	bmm
FBgn0032785	0.529464	0.0348671	0.339284	protein_coding	CG10026
FBgn0085428	0.52894	0.0102502	0.159202	protein_coding	Nox
FBgn0010044	0.528108	0.0186026	0.238143	protein_coding	GstD8
FBgn0038412	0.527926	0.27097	0.849954	protein_coding	Zip89B
FBgn0031169	0.527475	0.0386219	0.356001	protein_coding	CG1494
FBgn0024319	0.527153	0.0211702	0.254991	protein_coding	Nach
FBgn0085412	0.526739	0.00157349	0.0438479	protein_coding	kmr
FBgn0027091	0.526494	1.19705e-05	0.00101845	protein_coding	CysRS
FBgn0043791	0.526399	0.718547	0.986904	protein_coding	phu
FBgn0033593	0.526289	0.00879525	0.144781	protein_coding	Listericin
FBgn0041183	0.525275	0.264521	0.843712	protein_coding	Tep1
FBgn0000279	0.525179	0.0314889	0.320354	protein_coding	CecC
FBgn0003483	0.524885	0.0718214	0.505114	protein_coding	spn-E
FBgn0261508	0.523413	0.0456554	0.392317	protein_coding	CG42656
FBgn0015919	0.523188	0.0141232	0.197355	protein_coding	caup
FBgn0266362	0.519595	0.00478901	0.0961897	ncRNA	lncRNA:CR45010
FBgn0050277	0.519527	0.000679507	0.0239296	protein_coding	Oatp58Da
FBgn0035623	0.518805	0.0274061	0.295716	protein_coding	mthl2
FBgn0032131	0.517453	0.000154754	0.00762978	protein_coding	CG3841
FBgn0259984	0.517088	0.0138502	0.195395	protein_coding	kuz
FBgn0267650	0.516606	0.0529501	0.430315	protein_coding	pre-mod(mdg4)-AA
FBgn0035777	0.513833	0.0978263	0.590999	protein_coding	CG8563
FBgn0003896	0.513727	0.0304737	0.313677	protein_coding	tup
FBgn0030764	0.513559	0.0582081	0.453495	protein_coding	CG9777
FBgn0035355	0.512763	8.68564e-06	0.000752729	protein_coding	CG16985
FBgn0030824	0.512548	0.00042904	0.0164334	protein_coding	CG5070
FBgn0034706	0.51253	0.00635741	0.116419	protein_coding	CG11275
FBgn0029804	0.511658	0.0425014	0.377294	protein_coding	CG3097
FBgn0037996	0.511456	0.0475187	0.403217	protein_coding	CG4830
FBgn0264907	0.510796	0.0227144	0.266313	protein_coding	CG44098
FBgn0033826	0.510712	0.00179068	0.0476096	protein_coding	CG4734
FBgn0052483	0.509315	0.0054778	0.105327	protein_coding	CG32483
FBgn0036503	0.508801	0.0204177	0.250541	protein_coding	CG13454
FBgn0034394	0.508342	0.0269573	0.294118	protein_coding	CG15096
FBgn0054054	0.508013	0.0784889	0.524918	protein_coding	CG34054
FBgn0000079	0.507759	0.00184143	0.0485029	protein_coding	Amy-p
FBgn0031049	0.507127	3.72069e-06	0.000361321	protein_coding	Sec61gamma
FBgn0035770	0.506561	0.000369853	0.0146328	protein_coding	pst
FBgn0036220	0.506555	0.0498853	0.414412	protein_coding	CG5897
FBgn0020388	0.506419	0.00041355	0.0159674	protein_coding	Gcn5
FBgn0021764	0.506277	0.000823217	0.0273855	protein_coding	sdk
FBgn0031032	0.505803	0.0353374	0.341228	protein_coding	CG14204
FBgn0039844	0.505708	0.00793276	0.135086	protein_coding	CG1607
FBgn0066101	0.505476	0.0136273	0.193806	protein_coding	LpR1
FBgn0067903	0.500799	0.00220278	0.0551497	protein_coding	IM18
FBgn0051091	0.500027	0.0248119	0.279323	protein_coding	CG31091
FBgn0035934	0.499062	0.0381026	0.354968	protein_coding	TrpA1
FBgn0034354	0.498615	0.00384878	0.082227	protein_coding	GstE11
FBgn0036824	0.495518	0.0031129	0.070918	protein_coding	CG3902
FBgn0260857	0.495356	4.934e-05	0.00295137	protein_coding	Bet1
FBgn0013432	0.495339	0.00357897	0.0785576	protein_coding	bcn92
FBgn0043841	0.495298	0.00845213	0.141566	protein_coding	vir-1
FBgn0035697	0.494922	0.312284	0.88158	protein_coding	CG10163
FBgn0024994	0.494843	3.40363e-05	0.00225312	protein_coding	Ugalt
FBgn0032123	0.494761	0.00870149	0.144174	protein_coding	Oatp30B
FBgn0040096	0.494526	0.137428	0.677258	protein_coding	lectin-33A
FBgn0031988	0.494473	0.00281107	0.0654374	protein_coding	CG8668
FBgn0266810	0.493887	0.0190885	0.240835	ncRNA	asRNA:CR45272
FBgn0051414	0.493878	0.0405677	0.366214	protein_coding	Gba1b
FBgn0029710	0.490981	0.0774836	0.52217	protein_coding	CG3568
FBgn0031253	0.490777	0.0231637	0.268643	protein_coding	CG11885
FBgn0041780	0.490274	0.0375106	0.352175	protein_coding	Ssl2
FBgn0039225	0.489421	0.026678	0.292121	protein_coding	Ets96B
FBgn0022700	0.488207	0.0109814	0.167314	protein_coding	Cht4
FBgn0039471	0.487611	0.00190051	0.0493823	protein_coding	CG6295
FBgn0266431	0.487279	0.0660195	0.483038	protein_coding	CG45061
FBgn0040837	0.487116	0.0789476	0.526749	protein_coding	CG8620
FBgn0034724	0.48648	0.00524442	0.102064	protein_coding	babos
FBgn0037672	0.485292	0.105251	0.607011	protein_coding	sage
FBgn0020521	0.48444	0.038273	0.355514	protein_coding	pio
FBgn0052195	0.484311	0.0319077	0.322228	protein_coding	CG32195
FBgn0051976	0.483731	0.0875289	0.557287	protein_coding	ovm
FBgn0063494	0.483526	0.0104952	0.162744	protein_coding	GstE6
FBgn0262107	0.482901	0.0559061	0.442736	ncRNA	asRNA:CR42860
FBgn0030148	0.481984	0.0513182	0.423042	protein_coding	CG3106
FBgn0030884	0.480253	0.00787496	0.135086	protein_coding	CG6847
FBgn0261555	0.479929	0.0434727	0.380991	protein_coding	CG42673
FBgn0261682	0.479739	0.0638033	0.475877	protein_coding	CG42729
FBgn0033728	0.479484	0.0228911	0.267081	protein_coding	Cpr49Ae
FBgn0031261	0.477984	0.108676	0.61522	protein_coding	nAChRbeta3
FBgn0003366	0.477439	0.0579372	0.452117	protein_coding	sev
FBgn0034588	0.477359	0.00147922	0.0425786	protein_coding	CG9394
FBgn0050197	0.477191	0.0203092	0.250004	protein_coding	CG30197
FBgn0033875	0.476686	0.00268867	0.0635107	protein_coding	CG6357
FBgn0036323	0.476512	0.157918	0.713453	protein_coding	CG14118
FBgn0026319	0.475862	0.00203135	0.0523577	protein_coding	Traf4
FBgn0051674	0.474196	0.000861969	0.0282181	protein_coding	CG31674
FBgn0029833	0.473701	1.55358e-05	0.00122427	protein_coding	MCTS1
FBgn0033246	0.473663	0.00014835	0.00746722	protein_coding	ACC
FBgn0028993	0.472913	0.0841797	0.544253	NA	NA
FBgn0034730	0.471423	0.0572572	0.449364	protein_coding	ppk12
FBgn0032734	0.471169	0.0202897	0.250004	protein_coding	CG15169
FBgn0039464	0.470347	0.019156	0.241244	protein_coding	CG6330
FBgn0036804	0.468906	0.00609492	0.113121	protein_coding	Sgf11
FBgn0265575	0.468739	0.00333399	0.0748902	protein_coding	yin
FBgn0259834	0.467312	0.00181995	0.0482011	protein_coding	out
FBgn0031632	0.467208	0.0821757	0.535037	protein_coding	CG15628
FBgn0050273	0.46706	0.0118977	0.177893	protein_coding	CG30273
FBgn0032405	0.466979	0.0703797	0.500566	protein_coding	firl
FBgn0038395	0.466585	0.0673676	0.489548	protein_coding	CG10407
FBgn0038126	0.46551	0.106987	0.610748	protein_coding	CG8483
FBgn0034331	0.465478	0.0134399	0.191796	protein_coding	BomBc2
FBgn0030518	0.465212	0.000410723	0.0159674	protein_coding	CG11134
FBgn0014343	0.465185	0.0215337	0.257685	protein_coding	mirr
FBgn0040382	0.463766	0.0286369	0.304552	protein_coding	CG5273
FBgn0031397	0.46264	0.0337342	0.335042	protein_coding	CG15385
FBgn0032877	0.461409	0.0485314	0.408923	protein_coding	CG2617
FBgn0037746	0.461102	0.0612619	0.465712	protein_coding	CG8478
FBgn0034712	0.461096	0.424796	0.939545	protein_coding	Alp8
FBgn0267995	0.459158	0.0153949	0.209344	ncRNA	asRNA:CR46262
FBgn0038610	0.458972	0.0183093	0.236594	protein_coding	CG7675
FBgn0004635	0.458537	0.0922895	0.574286	protein_coding	rho
FBgn0004425	0.457657	0.0988478	0.592101	protein_coding	LysB
FBgn0031815	0.457244	0.000171682	0.00825277	protein_coding	frj
FBgn0039537	0.456973	0.00253532	0.0607845	protein_coding	CG5590
FBgn0030028	0.456698	0.11874	0.637904	protein_coding	Corp
FBgn0052011	0.456193	0.01241	0.182431	pseudogene	CR32011
FBgn0033348	0.454111	0.0737358	0.510364	protein_coding	Spt
FBgn0002719	0.454068	0.00551852	0.105687	protein_coding	Men
FBgn0051864	0.452545	0.00871284	0.144174	protein_coding	Qtzl
FBgn0010620	0.452278	0.00586939	0.110644	protein_coding	CG10939
FBgn0283531	0.451848	0.0801771	0.530096	protein_coding	Duox
FBgn0031734	0.451826	0.0680894	0.492189	protein_coding	CG11147
FBgn0267535	0.451816	0.048879	0.411131	ncRNA	asRNA:CR45875
FBgn0038422	0.451504	0.304525	0.874318	protein_coding	CG14880
FBgn0085249	0.451059	0.0797147	0.529747	protein_coding	CG34220
FBgn0028952	0.450998	0.0336359	0.334758	protein_coding	Kebab
FBgn0033733	0.450805	0.000866606	0.0282425	protein_coding	CG8834
FBgn0034117	0.450569	0.0215033	0.257685	protein_coding	CG7997
FBgn0261841	0.450059	0.0844399	0.544746	protein_coding	pre-mod(mdg4)-AD
FBgn0031322	0.449945	4.99861e-05	0.00296646	protein_coding	CG5001
FBgn0034756	0.449173	0.0413074	0.370457	protein_coding	Cyp6d2
FBgn0284247	0.449	0.112238	0.623224	protein_coding	ds
FBgn0036279	0.448809	0.00381702	0.0819125	protein_coding	Ncc69
FBgn0034081	0.448475	0.0114692	0.173101	protein_coding	CG10731
FBgn0033792	0.448229	0.11148	0.622759	protein_coding	CG13325
FBgn0031195	0.448228	0.003935	0.0833283	protein_coding	CG17600
FBgn0023526	0.447958	0.0641922	0.478035	protein_coding	CG2865
FBgn0038680	0.44795	0.00926311	0.149422	protein_coding	Cyp12a5
FBgn0085481	0.44721	0.0590302	0.45657	protein_coding	CG34452
FBgn0039670	0.44717	0.0165913	0.221834	protein_coding	CG7567
FBgn0053510	0.446973	0.168956	0.733006	protein_coding	CG33510
FBgn0036766	0.44645	0.00260756	0.0618991	protein_coding	CG5506
FBgn0250836	0.446207	0.018642	0.23833	protein_coding	Acbp3
FBgn0020414	0.446188	0.0161968	0.217784	protein_coding	Idgf3
FBgn0050026	0.446024	0.0119418	0.178273	protein_coding	CG30026
FBgn0039473	0.445965	0.134273	0.669374	protein_coding	CG17191
FBgn0050381	0.445276	0.0234954	0.270845	protein_coding	PIG-X
FBgn0031837	0.443494	0.0804155	0.530621	protein_coding	DIP-iota
FBgn0000422	0.442485	0.0633056	0.473635	protein_coding	Ddc
FBgn0004646	0.442474	0.0054213	0.104659	protein_coding	ogre
FBgn0020300	0.440959	0.0970647	0.589387	protein_coding	geko
FBgn0010388	0.440823	0.155091	0.708158	protein_coding	Dro
FBgn0050021	0.440274	0.139294	0.678552	protein_coding	metro
FBgn0033853	0.439132	0.0352838	0.341228	protein_coding	CG6145
FBgn0033926	0.438694	0.00885796	0.145077	protein_coding	Arc1
FBgn0051549	0.438178	0.0170111	0.22465	protein_coding	CG31549
FBgn0015229	0.438108	0.010217	0.1592	protein_coding	glec
FBgn0262524	0.437947	0.0640572	0.4774	protein_coding	ver
FBgn0002632	0.437441	0.138177	0.677258	protein_coding	E(spl)m6-BFM
FBgn0033258	0.43737	0.0391633	0.358162	protein_coding	CG8712
FBgn0032666	0.435761	0.0599867	0.459246	protein_coding	CG5758
FBgn0039681	0.435446	0.0529989	0.430347	protein_coding	CG7582
FBgn0032451	0.43529	8.88327e-05	0.00479796	protein_coding	spict
FBgn0036571	0.43482	0.000656898	0.0233041	protein_coding	Strump
FBgn0039779	0.434623	0.216224	0.799221	protein_coding	PH4alphaSG2
FBgn0000084	0.434175	0.028871	0.305017	protein_coding	AnxB10
FBgn0262531	0.43388	0.142548	0.685912	protein_coding	CG43085
FBgn0035696	0.433627	0.0507564	0.419581	protein_coding	Best2
FBgn0030348	0.432732	0.050242	0.416402	protein_coding	CG10352
FBgn0051866	0.432426	0.0146277	0.201476	protein_coding	Ada1-2
FBgn0037375	0.43213	0.120604	0.639607	protein_coding	kat-60L1
FBgn0033115	0.432061	0.0951733	0.584662	protein_coding	Spn42De
FBgn0030590	0.431907	0.0378005	0.353516	protein_coding	CG9518
FBgn0264486	0.430928	0.708497	0.986904	protein_coding	CG43894
FBgn0035571	0.430375	0.025886	0.285072	protein_coding	CG12493
FBgn0030073	0.43033	0.00187624	0.048884	protein_coding	CG10962
FBgn0039093	0.429962	0.170207	0.735602	protein_coding	CG10183
FBgn0052564	0.429248	0.92016	0.996106	protein_coding	CG32564
FBgn0038662	0.428584	0.0089665	0.14615	protein_coding	Mpc1
FBgn0030576	0.42841	0.132783	0.666269	protein_coding	CG15890
FBgn0032233	0.428128	0.137946	0.677258	protein_coding	dpr19
FBgn0086690	0.42752	0.013466	0.191796	protein_coding	Plp
FBgn0037783	0.427376	0.35125	0.901572	protein_coding	Npc2c
FBgn0051259	0.426275	0.13069	0.66239	protein_coding	CG31259
FBgn0035982	0.426084	0.18885	0.764648	protein_coding	CG4461
FBgn0264605	0.424193	0.00451233	0.0917158	protein_coding	CG43954
FBgn0035663	0.423988	0.112276	0.623224	protein_coding	CG6462
FBgn0033633	0.42394	0.0477269	0.404545	protein_coding	Smyd4-3
FBgn0038498	0.423148	0.12025	0.639531	protein_coding	beat-IIa
FBgn0034021	0.422477	0.145176	0.692323	protein_coding	CG8180
FBgn0053265	0.422458	0.00173538	0.0467342	protein_coding	Muc68E
FBgn0032010	0.422192	0.105974	0.608623	protein_coding	CG8086
FBgn0034500	0.422165	0.0241499	0.275092	protein_coding	CG11200
FBgn0035781	0.42127	0.0375682	0.352372	protein_coding	CG8560
FBgn0037941	0.421101	0.238698	0.819625	protein_coding	CG12594
FBgn0027070	0.42097	0.0914825	0.571465	protein_coding	Ugt36E1
FBgn0035166	0.420923	0.00402063	0.0845383	protein_coding	JMJD5
FBgn0029839	0.4208	0.113662	0.627292	protein_coding	CG4660
FBgn0037433	0.420725	0.11866	0.637904	protein_coding	CG17919
FBgn0032701	0.420602	0.0535395	0.431457	protein_coding	CG10341
FBgn0263608	0.420554	0.0569856	0.447598	protein_coding	l(3)72Dr
FBgn0036862	0.419942	0.0716364	0.504495	protein_coding	Gbs-76A
FBgn0259730	0.419588	0.161316	0.719826	protein_coding	tal-1A
FBgn0259731	0.419588	0.161316	0.719826	protein_coding	tal-2A
FBgn0259732	0.419588	0.161316	0.719826	protein_coding	tal-3A
FBgn0259733	0.419588	0.161316	0.719826	protein_coding	tal-AA
FBgn0267468	0.419273	0.101203	0.597478	ncRNA	asRNA:CR45818
FBgn0033945	0.419205	0.0404553	0.365763	protein_coding	CG12868
FBgn0025709	0.419169	0.0346515	0.33881	protein_coding	CNT2
FBgn0032140	0.419156	0.0287978	0.305017	protein_coding	CG13117
FBgn0044020	0.41869	0.00466203	0.0945586	protein_coding	Roc2
FBgn0010038	0.418341	0.0925724	0.57493	protein_coding	GstD2
FBgn0265829	0.418229	0.136606	0.676246	ncRNA	lncRNA:CR44618
FBgn0040091	0.417718	0.125196	0.649562	protein_coding	Ugt317A1
FBgn0036066	0.417568	0.000257045	0.0112841	protein_coding	CG14160
FBgn0033204	0.416928	0.121454	0.641573	protein_coding	CG2065
FBgn0037236	0.416915	0.0464744	0.397867	protein_coding	Skp2
FBgn0034563	0.416854	0.203456	0.785499	protein_coding	CG15649
FBgn0037661	0.416734	0.0497877	0.414379	protein_coding	Ada
FBgn0039298	0.416409	0.142458	0.685824	protein_coding	to
FBgn0263768	0.416408	0.0441875	0.385148	ncRNA	lncRNA:CR43685
FBgn0001149	0.416232	0.0017354	0.0467342	protein_coding	GstD1
FBgn0260484	0.416117	0.00243564	0.0592817	protein_coding	HIP
FBgn0035392	0.415431	0.00293178	0.0675926	protein_coding	CG1271
FBgn0011746	0.415207	0.165428	0.72461	protein_coding	ana
FBgn0038277	0.415126	0.135288	0.672525	protein_coding	RpS5b
FBgn0085223	0.415009	0.0163818	0.219965	protein_coding	CG34194
FBgn0050154	0.414223	0.0142787	0.199239	protein_coding	CG30154
FBgn0039687	0.413984	0.0509607	0.420907	protein_coding	Naa40
FBgn0264674	0.413553	0.63972	0.982921	ncRNA	asRNA:CR43959
FBgn0035356	0.41352	0.00209369	0.0533918	protein_coding	CG16986
FBgn0004795	0.412704	0.0784915	0.524918	protein_coding	retn
FBgn0034261	0.412423	0.00238057	0.0580883	protein_coding	HPS4
FBgn0037677	0.411682	0.152115	0.705469	protein_coding	CG12951
FBgn0040348	0.411576	0.0627006	0.471801	protein_coding	CG3703
FBgn0031745	0.411494	0.0581358	0.453299	protein_coding	rau
FBgn0046687	0.410937	0.0466642	0.398074	protein_coding	Tre1
FBgn0264915	0.409683	0.08039	0.530621	ncRNA	asRNA:CR44106
FBgn0031548	0.409185	0.0992749	0.592516	protein_coding	CG8852
FBgn0032464	0.408927	0.0706149	0.501027	protein_coding	Vha68-3
FBgn0039203	0.408901	0.177213	0.749266	protein_coding	CG13618
FBgn0020880	0.408465	0.152706	0.706081	protein_coding	CG7179
FBgn0036300	0.40831	0.000112429	0.00590653	protein_coding	Pmm2
FBgn0031645	0.408183	0.224182	0.805281	protein_coding	CG3036
FBgn0043005	0.406694	0.160046	0.718181	protein_coding	prt
FBgn0035313	0.406572	0.0354214	0.341566	protein_coding	CG13810
FBgn0036369	0.40651	0.0807592	0.531739	protein_coding	CG10089
FBgn0264776	0.40642	0.0305408	0.313696	protein_coding	CG44014
FBgn0016075	0.406264	0.138495	0.677258	protein_coding	vkg
FBgn0024957	0.40621	0.0217513	0.259451	protein_coding	Irp-1B
FBgn0031945	0.404582	0.0349197	0.339452	protein_coding	CG7191
FBgn0261929	0.403971	0.138885	0.678304	protein_coding	5-HT2B
FBgn0030799	0.40313	0.000278887	0.0119165	protein_coding	CG4872
FBgn0083123	0.401813	0.200827	0.781679	ncRNA	Uhg5
FBgn0015829	0.400935	0.00479247	0.0961897	protein_coding	TfIIEbeta
FBgn0032805	0.400929	0.000192521	0.00886128	protein_coding	CG10337
FBgn0030270	0.400247	0.0627661	0.471801	protein_coding	CG15199
FBgn0027500	0.400062	0.055898	0.442736	protein_coding	spd-2
FBgn0263220	0.399566	0.293371	0.866331	protein_coding	Hk
FBgn0052843	0.399503	0.0749141	0.512605	protein_coding	Dh31-R
FBgn0033464	0.39912	0.235536	0.814669	protein_coding	CG1441
FBgn0053774	0.398506	0.0239396	0.275071	protein_coding	CG33774
FBgn0029976	0.398292	0.0722205	0.506439	protein_coding	snz
FBgn0000299	0.39822	0.135538	0.672726	protein_coding	Col4a1
FBgn0003447	0.397781	0.0363316	0.346176	protein_coding	sn
FBgn0038721	0.397497	0.0347126	0.33881	protein_coding	subdued
FBgn0051956	0.396849	0.00864329	0.144015	protein_coding	Pgant4
FBgn0004228	0.396812	3.30912e-05	0.00224041	protein_coding	mex1
FBgn0266457	0.396253	0.202957	0.785205	ncRNA	lncRNA:CR45082
FBgn0262580	0.395487	0.00576992	0.10938	protein_coding	CG43120
FBgn0038156	0.394124	0.162422	0.721872	protein_coding	side-IV
FBgn0085194	0.393959	0.0319683	0.322378	protein_coding	CG34165
FBgn0019952	0.393795	0.0194523	0.24256	protein_coding	Orct
FBgn0051077	0.393172	0.17888	0.750655	protein_coding	CG31077
FBgn0027586	0.392419	0.00939353	0.150536	protein_coding	CG5867
FBgn0036620	0.392373	0.194764	0.773745	protein_coding	CG4842
FBgn0063485	0.392335	0.000510023	0.0189319	protein_coding	Lasp
FBgn0038083	0.392219	0.0301794	0.312846	protein_coding	Ugt37A3
FBgn0260388	0.391059	0.020431	0.250541	protein_coding	CG42514
FBgn0051191	0.390881	0.160434	0.719349	protein_coding	CG31191
FBgn0264488	0.390432	0.267363	0.845813	protein_coding	CG43896
FBgn0053012	0.390057	0.0970516	0.589387	protein_coding	CG33012
FBgn0036570	0.389356	0.0148168	0.203063	protein_coding	IntS9
FBgn0004428	0.388302	0.135539	0.672726	protein_coding	LysE
FBgn0029879	0.388176	0.174472	0.744837	protein_coding	APC7
FBgn0038143	0.388096	0.053636	0.431873	protein_coding	CG9813
FBgn0040600	0.387948	0.0552279	0.440413	protein_coding	CG13631
FBgn0037811	0.387898	0.109491	0.618195	protein_coding	CG12592
FBgn0051974	0.387852	0.0169025	0.224045	protein_coding	CG31974
FBgn0015569	0.387315	0.144989	0.692224	protein_coding	alpha-Est10
FBgn0010453	0.386382	0.113787	0.627625	protein_coding	Wnt4
FBgn0262536	0.386268	0.0198605	0.245739	protein_coding	CG43090
FBgn0050284	0.386086	0.11531	0.63054	protein_coding	CG30284
FBgn0031005	0.385958	0.0914817	0.571465	protein_coding	Hs3st-B
FBgn0039283	0.385812	0.180854	0.752696	protein_coding	danr
FBgn0040968	0.385677	0.0387868	0.356001	protein_coding	CG14933
FBgn0028990	0.385205	0.0691731	0.495551	protein_coding	Spn27A
FBgn0039092	0.384571	0.0419435	0.374067	protein_coding	CG16723
FBgn0262887	0.384334	0.100025	0.593608	ncRNA	lncRNA:CR43242
FBgn0031435	0.384263	0.178519	0.750655	protein_coding	Elba2
FBgn0037684	0.382589	0.100992	0.597035	protein_coding	Srr
FBgn0266181	0.382506	0.120083	0.639531	ncRNA	lncRNA:CRG
FBgn0030816	0.38188	0.087853	0.55898	protein_coding	CG16700
FBgn0010470	0.381531	0.00144842	0.0418172	protein_coding	Fkbp14
FBgn0264834	0.380765	0.184346	0.755458	ncRNA	lncRNA:CR44042
FBgn0031710	0.379981	0.00960446	0.152624	protein_coding	Vps52
FBgn0037228	0.378975	0.111692	0.622944	protein_coding	CG1092
FBgn0015336	0.377029	0.000335357	0.0136784	protein_coding	CG15865
FBgn0030257	0.376816	0.181127	0.753248	protein_coding	SmydA-4
FBgn0035309	0.376762	0.124692	0.647372	protein_coding	CG15879
FBgn0030407	0.376044	0.0175679	0.230106	protein_coding	Fpgs
FBgn0000927	0.375925	0.23992	0.820012	protein_coding	fs(1)Ya
FBgn0031249	0.375701	0.09137	0.571465	protein_coding	CG11911
FBgn0032783	0.375365	0.178272	0.750655	protein_coding	CG10237
FBgn0052407	0.375138	0.0613157	0.465712	protein_coding	CG32407
FBgn0032059	0.374965	0.0207751	0.252825	protein_coding	PrBP
FBgn0033873	0.374944	0.122333	0.642707	protein_coding	CG6337
FBgn0040064	0.374188	0.0337227	0.335042	protein_coding	yip2
FBgn0039299	0.373734	0.216139	0.799221	protein_coding	CG11854
FBgn0026189	0.373695	0.00730701	0.128193	protein_coding	promL
FBgn0085256	0.373249	0.000743798	0.025655	protein_coding	CG34227
FBgn0032191	0.373238	0.0087096	0.144174	protein_coding	Snx17
FBgn0003656	0.37185	0.0498255	0.414379	protein_coding	sws
FBgn0039343	0.371814	0.133774	0.66881	protein_coding	CG5111
FBgn0047135	0.371433	0.000704766	0.0246023	protein_coding	CG32276
FBgn0031143	0.369905	0.0427355	0.377975	protein_coding	CG1532
FBgn0003353	0.369484	0.140477	0.68142	protein_coding	sei
FBgn0284226	0.369302	0.0980115	0.591064	protein_coding	CG46310
FBgn0036935	0.369035	0.10448	0.604374	protein_coding	CG14186
FBgn0027572	0.368978	0.068612	0.494082	protein_coding	CG5009
FBgn0263380	0.368888	0.133105	0.667537	ncRNA	lncRNA:CR43432
FBgn0036952	0.368841	0.690733	0.986206	protein_coding	CG6933
FBgn0031874	0.368094	0.0891587	0.563188	protein_coding	CG13775
FBgn0029095	0.367922	0.029449	0.309424	protein_coding	aru
FBgn0041184	0.367046	0.164543	0.72461	protein_coding	Socs36E
FBgn0050148	0.367013	0.138485	0.677258	protein_coding	CG30148
FBgn0030769	0.36596	0.312886	0.88158	protein_coding	CG13012
FBgn0266404	0.363661	0.101237	0.597478	ncRNA	asRNA:CR45044
FBgn0053531	0.362857	0.213846	0.796532	protein_coding	Ddr
FBgn0261387	0.362717	0.00201036	0.0519559	protein_coding	CG17528
FBgn0260942	0.362093	0.184616	0.755765	protein_coding	bond
FBgn0038652	0.361982	0.266888	0.845532	protein_coding	CG7720
FBgn0003411	0.36177	0.153033	0.706081	protein_coding	sisA
FBgn0266521	0.361389	0.13091	0.66239	protein_coding	stai
FBgn0260795	0.361158	0.166814	0.726666	protein_coding	NaPi-III
FBgn0035264	0.360768	0.0667049	0.486941	protein_coding	Oseg4
FBgn0031735	0.360486	0.183353	0.754927	protein_coding	CG11029
FBgn0263457	0.360212	0.132174	0.664601	ncRNA	asRNA:CR43480
FBgn0263442	0.359997	0.213375	0.796532	ncRNA	asRNA:CR43465
FBgn0052412	0.359531	0.124686	0.647372	protein_coding	QC
FBgn0050438	0.359123	0.26792	0.846545	protein_coding	Ugt50B3
FBgn0041181	0.358311	0.0373315	0.35148	protein_coding	Tep3
FBgn0052856	0.357777	0.0926607	0.575107	protein_coding	CG32856
FBgn0085409	0.356954	0.0616393	0.465758	protein_coding	smal
FBgn0023177	0.356902	0.00170187	0.0464393	protein_coding	Pp4-19C
FBgn0032682	0.356325	0.107739	0.612179	protein_coding	grnd
FBgn0033240	0.35531	0.0423008	0.376207	protein_coding	CG2906
FBgn0004580	0.354947	0.0971072	0.589387	protein_coding	Cbp53E
FBgn0039328	0.353696	0.059639	0.458695	protein_coding	CHKov2
FBgn0033983	0.353316	0.214916	0.797228	protein_coding	ADPS
FBgn0039869	0.352919	0.0123638	0.182309	protein_coding	CG1890
FBgn0086691	0.352592	0.0658475	0.48268	protein_coding	UK114
FBgn0039114	0.351428	0.979899	0.99888	protein_coding	Lsd-1
FBgn0034670	0.351339	0.0967848	0.589387	protein_coding	CG13488
FBgn0267035	0.351114	0.154223	0.706385	ncRNA	asRNA:CR45479
FBgn0032705	0.350637	0.169787	0.734953	protein_coding	Grip71
FBgn0023214	0.350463	0.143603	0.689265	protein_coding	edl
FBgn0261611	0.349925	0.118836	0.637904	protein_coding	CG42700
FBgn0027496	0.34862	0.00214486	0.054265	protein_coding	epsilonCOP
FBgn0035194	0.348433	0.0794121	0.529207	protein_coding	Psf1
FBgn0033968	0.348134	0.163064	0.722747	protein_coding	hui
FBgn0015520	0.347681	0.0921977	0.574086	protein_coding	nonA-l
FBgn0004055	0.347436	0.117341	0.635559	protein_coding	uzip
FBgn0047114	0.346828	0.0428053	0.378093	protein_coding	CG31142
FBgn0035323	0.346465	0.0381405	0.354968	protein_coding	CG13807
FBgn0032780	0.346022	0.0134426	0.191796	protein_coding	CG13085
FBgn0002578	0.345645	0.0704875	0.500863	protein_coding	Kaz-m1
FBgn0039038	0.344791	0.14045	0.68142	protein_coding	CG6688
FBgn0263232	0.344782	0.107226	0.611217	protein_coding	Nxf3
FBgn0036951	0.344216	0.00765932	0.13244	protein_coding	CG7017
FBgn0029821	0.344039	0.232217	0.812781	protein_coding	CG4020
FBgn0051810	0.344021	0.220669	0.80321	protein_coding	CG31810
FBgn0051028	0.343905	0.257388	0.834772	protein_coding	CG31028
FBgn0264446	0.343307	0.196516	0.775528	ncRNA	asRNA:CR43864
FBgn0042125	0.342848	0.0678056	0.491125	protein_coding	CG18787
FBgn0036848	0.342822	0.00837424	0.140752	protein_coding	Naxd
FBgn0260986	0.342706	0.137798	0.677258	protein_coding	mei-38
FBgn0054039	0.3423	0.0739401	0.510981	protein_coding	CG34039
FBgn0031309	0.342294	0.117815	0.63669	protein_coding	Tfb4
FBgn0038766	0.342118	0.163402	0.722747	protein_coding	CG4854
FBgn0051869	0.342006	0.133854	0.66881	protein_coding	CG31869
FBgn0038082	0.341485	0.0799989	0.530096	protein_coding	Ugt37A2
FBgn0032120	0.341202	0.00102753	0.0320735	protein_coding	CG33298
FBgn0039680	0.340989	0.116376	0.633371	protein_coding	Cap-D2
FBgn0051793	0.339577	0.0561254	0.443012	protein_coding	CG31793
FBgn0032943	0.339574	0.0121815	0.18073	protein_coding	Tsp39D
FBgn0030607	0.339448	0.251994	0.83291	protein_coding	dob
FBgn0034195	0.338932	0.246856	0.826552	protein_coding	Spn53F
FBgn0031824	0.338612	0.130769	0.66239	protein_coding	CG9547
FBgn0020236	0.338124	0.0295754	0.309978	protein_coding	ATPCL
FBgn0037634	0.337995	0.196827	0.77553	protein_coding	hng2
FBgn0259233	0.337796	0.491844	0.953904	protein_coding	CG42331
FBgn0039564	0.337564	0.10199	0.59816	protein_coding	Nep7
FBgn0033948	0.337438	0.209575	0.789521	protein_coding	CG12863
FBgn0031393	0.337404	0.19631	0.775528	protein_coding	CG15382
FBgn0038842	0.336915	0.17122	0.736495	protein_coding	hdly
FBgn0028360	0.336504	0.0600558	0.459246	protein_coding	Cdc7
FBgn0283503	0.336431	0.0305145	0.313696	protein_coding	Neurl4
FBgn0002571	0.336258	0.112267	0.623224	protein_coding	Mal-A3
FBgn0037235	0.33598	0.132675	0.666075	protein_coding	CG1103
FBgn0259677	0.335931	0.204483	0.786661	protein_coding	CG42346
FBgn0036454	0.335601	0.0957731	0.586473	protein_coding	CG17839
FBgn0039042	0.33483	0.263179	0.841996	protein_coding	CG13837
FBgn0032955	0.334304	0.0108057	0.16587	protein_coding	CG2201
FBgn0000276	0.333552	0.0322585	0.32373	protein_coding	CecA1
FBgn0263354	0.333515	0.280946	0.858753	protein_coding	CG42784
FBgn0067783	0.333241	0.0658216	0.48268	protein_coding	DPCoAC
FBgn0263080	0.333159	0.165973	0.725304	protein_coding	CG43348
FBgn0031473	0.332953	0.0916666	0.571519	protein_coding	CG3104
FBgn0033467	0.332707	0.151345	0.703336	protein_coding	Pdrg1
FBgn0037448	0.332594	0.160971	0.719826	protein_coding	CG15186
FBgn0037290	0.332492	0.22617	0.806521	protein_coding	CG1124
FBgn0250907	0.332307	0.244846	0.824916	protein_coding	Cht10
FBgn0037547	0.3323	0.29537	0.867566	protein_coding	CG7910
FBgn0032225	0.332183	0.173509	0.741385	protein_coding	CG5022
FBgn0087011	0.332066	0.176033	0.748096	protein_coding	CG41520
FBgn0036226	0.331939	0.421351	0.939545	protein_coding	CG7252
FBgn0030795	0.331787	0.228141	0.807137	protein_coding	ppk28
FBgn0261560	0.331437	0.114461	0.629897	protein_coding	Thor
FBgn0033584	0.331284	0.0635852	0.475356	protein_coding	CG7737
FBgn0051453	0.330776	0.138094	0.677258	protein_coding	pch2
FBgn0051759	0.330282	0.0781231	0.524494	protein_coding	CG31759
FBgn0032891	0.329899	0.116836	0.634611	protein_coding	Oseg5
FBgn0035948	0.329851	0.229475	0.809604	protein_coding	CG5644
FBgn0037391	0.329793	0.0808343	0.531739	protein_coding	CG2017
FBgn0000359	0.329305	0.431474	0.939545	protein_coding	Cp36
FBgn0033518	0.328851	0.144837	0.692224	protein_coding	Prx2540-2
FBgn0000592	0.328829	0.149772	0.702173	protein_coding	Est-6
FBgn0034428	0.327857	0.412173	0.934363	protein_coding	AANATL6
FBgn0000565	0.327571	0.0632702	0.473635	protein_coding	MsrA
FBgn0035414	0.327389	0.227199	0.806798	protein_coding	CG14965
FBgn0051104	0.327255	0.120082	0.639531	protein_coding	CG31104
FBgn0058006	0.327232	0.238679	0.819625	protein_coding	CG40006
FBgn0003984	0.327059	0.187411	0.761299	protein_coding	vn
FBgn0000633	0.325375	0.199754	0.78023	protein_coding	CG17716
FBgn0000640	0.325325	0.282926	0.860395	protein_coding	Fbp2
FBgn0032061	0.325219	0.23802	0.818722	protein_coding	CG9314
FBgn0016032	0.32493	0.102441	0.599069	protein_coding	lbm
FBgn0031389	0.324679	0.182698	0.754493	protein_coding	CG4259
FBgn0031894	0.324419	0.381913	0.922077	protein_coding	CG4496
FBgn0042103	0.32401	0.0600428	0.459246	protein_coding	CG18746
FBgn0034580	0.323804	0.307399	0.877158	protein_coding	Cht8
FBgn0037251	0.323659	0.115005	0.630307	protein_coding	CG9804
FBgn0030930	0.323471	0.0419006	0.374032	protein_coding	Pgant7
FBgn0052695	0.322562	0.145051	0.692224	protein_coding	CG32695
FBgn0050000	0.322311	0.00476545	0.0960484	protein_coding	GstT1
FBgn0039341	0.321437	0.0688135	0.494273	protein_coding	CG5112
FBgn0262148	0.321382	0.314111	0.883343	ncRNA	lncRNA:CR42874
FBgn0038302	0.321321	0.0445988	0.387329	protein_coding	CG4210
FBgn0036419	0.320983	0.151363	0.703336	protein_coding	CG13482
FBgn0040001	0.320738	0.223379	0.805281	NA	NA
FBgn0261575	0.320501	0.210773	0.790933	protein_coding	tobi
FBgn0010226	0.320292	0.123984	0.64606	protein_coding	GstS1
FBgn0085330	0.319922	0.0239592	0.275071	protein_coding	CG34301
FBgn0004394	0.319766	0.173275	0.740712	protein_coding	pdm2
FBgn0033665	0.319363	0.0432277	0.379535	protein_coding	Zip48C
FBgn0033153	0.319232	0.11983	0.639531	protein_coding	Gadd45
FBgn0052694	0.318865	0.19419	0.772718	protein_coding	CG32694
FBgn0265915	0.3188	0.269834	0.849491	ncRNA	asRNA:CR44704
FBgn0010288	0.318592	0.00749953	0.131092	protein_coding	Uch
FBgn0259239	0.318222	0.217591	0.801787	protein_coding	CG42337
FBgn0037057	0.318063	0.00947332	0.15129	protein_coding	CG10512
FBgn0036462	0.318032	0.0051311	0.100739	protein_coding	mRpL39
FBgn0029088	0.3175	0.0067478	0.121032	protein_coding	disp
FBgn0058354	0.317035	0.20856	0.788908	pseudogene	CR40354
FBgn0035977	0.316946	0.0844827	0.544746	protein_coding	PGRP-LF
FBgn0032001	0.316901	0.0158584	0.213533	protein_coding	CG8360
FBgn0263607	0.316854	0.0575072	0.450591	protein_coding	l(3)72Dp
FBgn0037521	0.316689	0.227561	0.806954	protein_coding	CG2993
FBgn0262886	0.315984	0.0299435	0.311555	ncRNA	lncRNA:CR43241
FBgn0013435	0.31579	0.117241	0.635559	protein_coding	Cdc2rk
FBgn0043575	0.315644	0.122825	0.643159	protein_coding	PGRP-SC2
FBgn0015221	0.315421	0.0560773	0.443012	protein_coding	Fer2LCH
FBgn0035192	0.314968	0.140619	0.68142	protein_coding	galene
FBgn0263981	0.314523	0.250072	0.829602	ncRNA	asRNA:CR43730
FBgn0037578	0.314352	0.0774878	0.52217	protein_coding	CG9601
FBgn0262169	0.313469	0.0381216	0.354968	protein_coding	magu
FBgn0032399	0.313359	0.287073	0.861995	protein_coding	CG6785
FBgn0031560	0.313335	0.202374	0.783895	protein_coding	CG16713
FBgn0015033	0.31325	0.227337	0.806798	protein_coding	Cyp4d8
FBgn0030362	0.313206	0.0381906	0.355091	protein_coding	regucalcin
FBgn0030398	0.313171	0.309067	0.878063	protein_coding	Cpr11B
FBgn0032139	0.313143	0.233225	0.813578	protein_coding	CG13116
FBgn0001257	0.312194	0.276571	0.856114	protein_coding	ImpL2
FBgn0028379	0.312191	0.406855	0.932317	protein_coding	fan
FBgn0053337	0.311684	0.0695277	0.496611	protein_coding	CG33337
FBgn0043470	0.310716	0.039304	0.358435	protein_coding	lambdaTry
FBgn0031146	0.310488	0.206789	0.787594	protein_coding	CG15449
FBgn0030828	0.31032	0.0754116	0.513986	protein_coding	CG5162
FBgn0027348	0.310307	0.0966654	0.589387	protein_coding	bgm
FBgn0015808	0.310089	0.0557172	0.441968	protein_coding	ScpX
FBgn0033459	0.309989	0.235788	0.814669	protein_coding	CG12744
FBgn0033395	0.309871	0.00634992	0.116419	protein_coding	Cyp4p2
FBgn0020251	0.309182	0.0370944	0.350319	protein_coding	sfl
FBgn0011722	0.309151	0.402017	0.930439	protein_coding	Tig
FBgn0010043	0.30913	0.192874	0.770649	protein_coding	GstD7
FBgn0038490	0.308597	0.247858	0.826552	protein_coding	CG5285
FBgn0051300	0.308238	0.0473598	0.402224	protein_coding	CG31300
FBgn0029800	0.308056	0.107352	0.611217	protein_coding	lin-52
FBgn0267601	0.307672	0.159063	0.716189	ncRNA	lncRNA:CR45939
FBgn0035780	0.307263	0.0120376	0.179425	protein_coding	CG18417
FBgn0023129	0.307232	0.344711	0.894819	protein_coding	aay
FBgn0001301	0.30708	0.0270885	0.294603	protein_coding	kel
FBgn0265988	0.306984	0.128638	0.662051	protein_coding	mv
FBgn0261933	0.306891	0.0513951	0.423042	protein_coding	SmD1
FBgn0031913	0.306578	0.0175579	0.230106	protein_coding	CG5958
FBgn0034490	0.306539	0.180077	0.752067	protein_coding	CG9864
FBgn0264443	0.306105	0.259722	0.838191	protein_coding	CG43861
FBgn0040531	0.305884	0.353573	0.904229	protein_coding	CG11741
FBgn0027660	0.305455	0.161452	0.719826	protein_coding	blot
FBgn0265959	0.305295	0.269759	0.849491	protein_coding	rdgC
FBgn0053107	0.305266	0.129749	0.66239	protein_coding	CG33107
FBgn0259237	0.305109	0.0515961	0.424333	protein_coding	CG42335
FBgn0011706	0.304472	0.460538	0.943026	protein_coding	rpr
FBgn0037409	0.304352	0.350185	0.900814	protein_coding	Osi24
FBgn0031662	0.303692	0.064565	0.47932	protein_coding	CG3792
FBgn0037200	0.303677	0.122749	0.643159	protein_coding	CG11109
FBgn0030334	0.303665	0.156009	0.710167	protein_coding	Karl
FBgn0051148	0.303521	0.12019	0.639531	protein_coding	Gba1a
FBgn0002985	0.303382	0.0250161	0.280964	protein_coding	odd
FBgn0039778	0.302996	0.473786	0.947277	protein_coding	Jon99Fi
FBgn0036101	0.302523	0.13667	0.676246	protein_coding	NijA
FBgn0051955	0.302201	0.144572	0.692194	protein_coding	CG31955
FBgn0000003	0.302112	0.273483	0.853936	ncRNA	7SLRNA:CR32864
FBgn0261504	0.302112	0.273483	0.853936	ncRNA	7SLRNA:CR42652
FBgn0024227	0.302104	0.27992	0.858695	protein_coding	aurB
FBgn0040104	0.301601	0.230926	0.810975	protein_coding	lectin-24A
FBgn0014427	0.301492	0.0773411	0.52217	protein_coding	CG11899
FBgn0043070	0.301455	0.00599032	0.111827	protein_coding	MESK2
FBgn0035656	0.301404	0.210763	0.790933	protein_coding	CG10479
FBgn0033627	0.301246	0.248684	0.826998	protein_coding	CG13204
FBgn0035348	0.300972	0.08321	0.540162	protein_coding	CG16758
FBgn0086254	0.300284	0.024142	0.275092	protein_coding	Akr1B
FBgn0031631	0.299889	0.228922	0.808246	protein_coding	CG3225
FBgn0033778	0.299521	0.12906	0.662168	protein_coding	Balat
FBgn0037980	0.29952	0.073352	0.50991	protein_coding	DCAF12
FBgn0024232	0.299143	0.156334	0.711307	protein_coding	gprs
FBgn0035964	0.299125	0.0412137	0.370058	protein_coding	Dhpr
FBgn0260964	0.298995	0.371748	0.912988	protein_coding	Vmat
FBgn0043069	0.298917	0.0576103	0.450663	protein_coding	MESK4
FBgn0033928	0.298316	0.0441244	0.384947	protein_coding	Arc2
FBgn0030010	0.297943	0.236222	0.815161	protein_coding	CG10959
FBgn0030485	0.297484	0.291106	0.864575	protein_coding	CG1998
FBgn0053099	0.297189	0.11271	0.624483	protein_coding	CG33099
FBgn0039768	0.296779	0.115254	0.63054	protein_coding	CG15533
FBgn0267668	0.296292	0.316051	0.883343	ncRNA	lncRNA:CR46006
FBgn0040958	0.296025	0.274854	0.85516	protein_coding	Peritrophin-15b
FBgn0037727	0.295689	0.15912	0.716189	protein_coding	Nepl12
FBgn0027343	0.295662	0.130958	0.66239	protein_coding	fz3
FBgn0030291	0.295565	0.214795	0.797228	protein_coding	CG1738
FBgn0031836	0.295369	0.114781	0.630273	protein_coding	CG11050
FBgn0034488	0.295321	0.0187217	0.238395	protein_coding	Hacl
FBgn0010019	0.294977	0.10758	0.611635	protein_coding	Cyp4g1
FBgn0051288	0.294948	0.234864	0.814561	protein_coding	CG31288
FBgn0030925	0.294611	0.221952	0.804922	protein_coding	Hayan
FBgn0266042	0.294569	0.21721	0.801481	ncRNA	asRNA:CR44807
FBgn0034142	0.294461	0.107819	0.612218	protein_coding	CG8306
FBgn0028506	0.294315	0.286375	0.861994	protein_coding	CG4455
FBgn0040070	0.29428	0.00706284	0.125512	protein_coding	Trx-2
FBgn0263400	0.294054	0.294577	0.866409	protein_coding	CG43446
FBgn0034219	0.294038	0.114857	0.630273	protein_coding	mthl4
FBgn0010042	0.293894	0.174874	0.745556	protein_coding	GstD6
FBgn0039641	0.293815	0.106328	0.6092	protein_coding	CG14511
FBgn0031649	0.29381	0.276304	0.856114	protein_coding	hoe2
FBgn0035087	0.293731	0.144643	0.692194	protein_coding	CG2765
FBgn0033465	0.293716	0.0652954	0.479565	NA	NA
FBgn0034997	0.293584	0.311051	0.880691	protein_coding	CG3376
FBgn0033785	0.293562	0.206425	0.787594	protein_coding	Sans
FBgn0051637	0.293325	0.0549657	0.439269	protein_coding	CG31637
FBgn0035768	0.29316	0.313565	0.882239	protein_coding	CG14834
FBgn0030768	0.292877	0.106193	0.60915	protein_coding	CG9723
FBgn0052111	0.292642	0.412309	0.934452	ncRNA	lncRNA:CR32111
FBgn0010382	0.291943	0.178321	0.750655	protein_coding	CycE
FBgn0265042	0.291795	0.163457	0.722747	protein_coding	Irk1
FBgn0038371	0.291551	0.174951	0.745556	protein_coding	Pbp45
FBgn0087041	0.291378	0.177732	0.750655	protein_coding	CG42231
FBgn0036695	0.291343	0.0681578	0.492213	protein_coding	Papst2
FBgn0038273	0.291307	0.210762	0.790933	protein_coding	CG14860
FBgn0027552	0.291237	0.0301265	0.312846	protein_coding	CG10863
FBgn0051961	0.291142	0.0352346	0.341228	protein_coding	TBCC
FBgn0038279	0.290941	0.227437	0.806857	protein_coding	Sdr
FBgn0038953	0.290926	0.0703937	0.500566	protein_coding	CG18596
FBgn0030928	0.290377	0.242401	0.822898	protein_coding	CG15044
FBgn0051248	0.290322	0.122457	0.642707	protein_coding	CG31248
FBgn0033355	0.2901	0.444512	0.939545	protein_coding	CG13748
FBgn0038476	0.289913	0.152264	0.705816	protein_coding	kuk
FBgn0039972	0.289812	0.259902	0.83849	protein_coding	Marf1
FBgn0039896	0.289599	0.270281	0.849491	protein_coding	yellow-h
FBgn0260817	0.289544	0.111568	0.622892	protein_coding	gkt
FBgn0030012	0.289389	0.209505	0.789521	protein_coding	CG18262
FBgn0003162	0.28896	0.179668	0.751667	protein_coding	Pu
FBgn0036545	0.287831	0.129936	0.66239	protein_coding	GXIVsPLA2
FBgn0050293	0.287802	0.35359	0.904229	protein_coding	Cht12
FBgn0034511	0.287736	0.288679	0.863136	protein_coding	GNBP-like3
FBgn0004516	0.287014	0.27643	0.856114	protein_coding	Gad1
FBgn0033261	0.286979	0.110056	0.619092	protein_coding	udd
FBgn0264753	0.286931	0.168028	0.729971	protein_coding	Rgk1
FBgn0050360	0.286744	0.102989	0.600682	protein_coding	Mal-A6
FBgn0032822	0.286681	0.132365	0.665217	protein_coding	CG10466
FBgn0035710	0.286102	0.184332	0.755458	protein_coding	SP1173
FBgn0051183	0.286017	0.0789356	0.526749	protein_coding	CG31183
FBgn0051155	0.285987	0.111155	0.622217	protein_coding	Rpb7
FBgn0260856	0.285699	0.146145	0.69419	protein_coding	Membrin
FBgn0036255	0.28562	0.0983678	0.591067	protein_coding	Atg12
FBgn0041712	0.285619	0.482413	0.95122	protein_coding	yellow-d
FBgn0052640	0.28551	0.0854564	0.548971	protein_coding	CG32640
FBgn0034494	0.285448	0.141029	0.681906	protein_coding	CG10444
FBgn0034578	0.285287	0.189502	0.765815	protein_coding	CG15653
FBgn0004606	0.285132	0.311412	0.880691	protein_coding	zfh1
FBgn0051721	0.285008	0.0188369	0.238395	protein_coding	Trim9
FBgn0052446	0.284845	0.0181977	0.235785	protein_coding	Atox1
FBgn0085261	0.284807	0.176521	0.748732	protein_coding	CG34232
FBgn0034512	0.284523	0.200152	0.780948	protein_coding	CG18067
FBgn0039249	0.284517	0.0712916	0.503598	protein_coding	CG11168
FBgn0283741	0.284505	0.116316	0.633371	protein_coding	prage
FBgn0265613	0.284386	0.29868	0.868601	ncRNA	asRNA:CR44431
FBgn0087021	0.284304	0.284917	0.860395	protein_coding	Spc25
FBgn0027617	0.28428	0.136874	0.676561	protein_coding	CG5808
FBgn0000261	0.284143	0.0853006	0.548548	protein_coding	Cat
FBgn0020415	0.283768	0.130192	0.66239	protein_coding	Idgf2
FBgn0027513	0.283231	0.27029	0.849491	protein_coding	ana2
FBgn0035838	0.282685	0.210343	0.790555	protein_coding	ldbr
FBgn0039696	0.282459	0.0738277	0.510633	protein_coding	Rnb
FBgn0002543	0.282417	0.107418	0.611217	protein_coding	robo2
FBgn0039417	0.282042	0.220781	0.80321	protein_coding	CG6073
FBgn0037620	0.28168	0.125967	0.651801	protein_coding	ranshi
FBgn0026778	0.281126	0.265716	0.845052	protein_coding	Rad1
FBgn0085343	0.281126	0.265716	0.845052	protein_coding	Sws1
FBgn0035998	0.281115	0.105483	0.607617	protein_coding	CG3437
FBgn0016013	0.281039	0.285464	0.861408	protein_coding	Faa
FBgn0083986	0.28095	0.1552	0.708158	protein_coding	CG34150
FBgn0028743	0.280935	0.089645	0.565517	protein_coding	Dhit
FBgn0046763	0.280763	0.204675	0.786661	protein_coding	CG17278
FBgn0052095	0.280635	0.210949	0.791285	protein_coding	CG32095
FBgn0032668	0.280179	0.172484	0.739635	protein_coding	CG17681
FBgn0086448	0.279923	0.19942	0.78023	protein_coding	PIG-Q
FBgn0031529	0.279557	0.207444	0.787664	protein_coding	CG9662
FBgn0035271	0.279357	0.136826	0.676561	protein_coding	CG2021
FBgn0031002	0.278974	0.0494795	0.413648	protein_coding	CG14196
FBgn0267348	0.278946	0.164643	0.72461	protein_coding	LanB2
FBgn0032744	0.278945	0.0864018	0.552673	protein_coding	Ttc19
FBgn0035112	0.278926	0.370178	0.912199	protein_coding	CG13877
FBgn0051915	0.278906	0.250591	0.83003	protein_coding	CG31915
FBgn0003996	0.278802	0.456399	0.941615	protein_coding	w
FBgn0039291	0.278778	0.0820034	0.535037	protein_coding	CG13663
FBgn0037635	0.278649	0.373544	0.913581	protein_coding	CG9837
FBgn0032362	0.278636	0.172729	0.740282	protein_coding	spz4
FBgn0002891	0.278227	0.102267	0.598414	protein_coding	DNApol-zeta
FBgn0034387	0.278201	0.0388439	0.356001	protein_coding	Cyp12b2
FBgn0031607	0.278054	0.0414139	0.371065	protein_coding	Secp43
FBgn0263494	0.277217	0.171612	0.736709	pseudogene	CR43483
FBgn0050334	0.276874	0.374613	0.914703	protein_coding	CG30334
FBgn0052448	0.276686	0.110612	0.620072	protein_coding	CG32448
FBgn0033521	0.275919	0.224215	0.805281	protein_coding	CG12896
FBgn0001099	0.275822	0.180325	0.752136	protein_coding	gdl
FBgn0283467	0.275749	0.0880622	0.559821	protein_coding	Pol32
FBgn0036422	0.275616	0.0860767	0.55096	protein_coding	CG3868
FBgn0038547	0.275605	0.300755	0.871973	protein_coding	CG17803
FBgn0051041	0.27551	0.409354	0.932317	protein_coding	CG31041
FBgn0043578	0.275329	0.148154	0.699585	protein_coding	PGRP-SB1
FBgn0030801	0.274861	0.149688	0.702173	protein_coding	Rcp
FBgn0038380	0.273935	0.195434	0.77464	protein_coding	CG14877
FBgn0259749	0.273925	0.0171441	0.225785	protein_coding	mmy
FBgn0035298	0.273123	0.118427	0.637847	protein_coding	SCOT
FBgn0054031	0.272665	0.237159	0.816779	protein_coding	CG34031
FBgn0003067	0.272636	0.296282	0.867566	protein_coding	Pepck1
FBgn0266488	0.272636	0.296282	0.867566	protein_coding	CG45087
FBgn0035265	0.272573	0.169073	0.733185	protein_coding	PIG-Wb
FBgn0015714	0.272497	0.106092	0.608938	protein_coding	Cyp6a17
FBgn0030653	0.272487	0.326225	0.889118	protein_coding	CG7860
FBgn0263236	0.272355	0.255198	0.833663	protein_coding	SP1029
FBgn0037176	0.272341	0.325778	0.889118	protein_coding	CG14456
FBgn0036249	0.272078	0.160085	0.718181	protein_coding	CG11560
FBgn0030478	0.272063	0.0279203	0.298251	protein_coding	CG1640
FBgn0027554	0.272025	0.0157944	0.213268	protein_coding	CG8042
FBgn0030794	0.271987	0.292179	0.86507	protein_coding	CG13005
FBgn0011591	0.271982	0.223195	0.805281	protein_coding	fng
FBgn0033309	0.271786	0.115881	0.632284	protein_coding	Lnpk
FBgn0019643	0.271641	0.0526275	0.42887	protein_coding	AANAT1
FBgn0001206	0.271594	0.206986	0.787594	protein_coding	Hmr
FBgn0033672	0.271453	0.0145117	0.200773	protein_coding	rho-7
FBgn0053468	0.271319	0.227161	0.806798	protein_coding	CG33468
FBgn0030484	0.271152	0.0499157	0.414412	protein_coding	GstT4
FBgn0003187	0.270899	0.312702	0.88158	protein_coding	qua
FBgn0035359	0.270488	0.234283	0.814561	protein_coding	CG1143
FBgn0263980	0.270014	0.293538	0.866331	protein_coding	Stacl
FBgn0030740	0.269945	0.0867565	0.554204	protein_coding	CG9917
FBgn0038465	0.269713	0.225038	0.805469	protein_coding	Irc
FBgn0039349	0.269526	0.0546368	0.437731	protein_coding	Ssadh
FBgn0037879	0.269492	0.310084	0.879661	protein_coding	scpr-C
FBgn0030723	0.269437	0.316933	0.883343	protein_coding	dpr18
FBgn0011774	0.269375	0.0531169	0.430941	protein_coding	Irbp
FBgn0266813	0.269272	0.19632	0.775528	ncRNA	asRNA:CR45275
FBgn0040805	0.269231	0.239406	0.819625	protein_coding	CG12355
FBgn0033821	0.269142	0.222353	0.805024	protein_coding	CG10799
FBgn0028699	0.269134	0.395393	0.928053	protein_coding	Rh50
FBgn0038295	0.268909	0.357729	0.906011	protein_coding	Gyc88E
FBgn0265596	0.268675	0.224421	0.805281	ncRNA	lncRNA:CR44423
FBgn0010015	0.268227	0.281593	0.859166	protein_coding	CanA1
FBgn0261284	0.26804	0.280286	0.858753	protein_coding	bou
FBgn0031055	0.267972	0.331809	0.889118	protein_coding	et
FBgn0085638	0.26797	0.0328435	0.328231	protein_coding	CG41378
FBgn0262962	0.267861	0.276674	0.856114	protein_coding	CG43273
FBgn0261791	0.26783	0.115747	0.632266	protein_coding	SNRPG
FBgn0025682	0.267681	0.321494	0.885922	protein_coding	scf
FBgn0035733	0.267539	0.346736	0.896107	protein_coding	CG8641
FBgn0035407	0.267481	0.208369	0.788908	protein_coding	Asciz
FBgn0040340	0.267473	0.044748	0.387923	protein_coding	TRAM
FBgn0030025	0.267331	0.127723	0.659469	protein_coding	CG2147
FBgn0041629	0.267324	0.317721	0.88359	protein_coding	Hexo2
FBgn0038353	0.267047	0.0835719	0.541051	protein_coding	CG5399
FBgn0285963	0.266975	0.200805	0.781679	protein_coding	CG46339
FBgn0261269	0.266972	0.417128	0.9375	protein_coding	conv
FBgn0003008	0.266832	0.100117	0.593786	protein_coding	or
FBgn0027584	0.266778	0.187426	0.761299	protein_coding	CG4757
FBgn0052082	0.266671	0.130163	0.66239	protein_coding	IRSp53
FBgn0027580	0.266585	0.139766	0.679672	protein_coding	PCB
FBgn0267164	0.266395	0.328454	0.889118	ncRNA	asRNA:CR45604
FBgn0263446	0.266384	0.291289	0.864575	ncRNA	asRNA:CR43469
FBgn0086350	0.266318	0.234418	0.814561	protein_coding	tef
FBgn0259098	0.26625	0.414544	0.934725	protein_coding	CG42246
FBgn0052582	0.26618	0.387869	0.926206	ncRNA	lncRNA:CR32582
FBgn0004066	0.266096	0.0144599	0.200603	protein_coding	Prosalpha4
FBgn0036587	0.266067	0.274182	0.854445	protein_coding	CG4950
FBgn0037376	0.265927	0.111116	0.622217	protein_coding	Hat1
FBgn0036126	0.265888	0.186262	0.7598	protein_coding	Irbp18
FBgn0044871	0.265673	0.0343222	0.33881	protein_coding	Gos28
FBgn0032034	0.265524	0.325309	0.889118	protein_coding	Rcd4
FBgn0010173	0.265502	0.0554677	0.441111	protein_coding	RpA-70
FBgn0284221	0.265064	0.0758448	0.51641	protein_coding	Sema5c
FBgn0267378	0.264847	0.00594262	0.111369	protein_coding	sau
FBgn0266882	0.264611	0.454264	0.941615	ncRNA	asRNA:CR45343
FBgn0028552	0.264538	0.117516	0.63615	protein_coding	gammaSnap1
FBgn0029722	0.264442	0.267359	0.845813	protein_coding	CG7024
FBgn0023197	0.264428	0.061584	0.465758	protein_coding	Jon74E
FBgn0285991	0.264308	0.0198512	0.245739	ncRNA	hpRNA:CR18854
FBgn0065032	0.264	0.0219471	0.261462	protein_coding	Arpc3B
FBgn0262801	0.263702	0.0184495	0.237741	protein_coding	twr
FBgn0026666	0.263634	0.0979261	0.590999	protein_coding	MagR
FBgn0085242	0.263436	0.196083	0.775528	protein_coding	CG34213
FBgn0004364	0.263328	0.124643	0.647372	protein_coding	18w
FBgn0025885	0.263244	0.104063	0.603104	protein_coding	Inos
FBgn0054001	0.263173	0.247041	0.826552	protein_coding	CG34001
FBgn0029507	0.263124	0.0277265	0.297171	protein_coding	Tsp42Ed
FBgn0039559	0.262891	0.0394077	0.358435	protein_coding	NSD
FBgn0030805	0.26281	0.406704	0.932317	protein_coding	wus
FBgn0039941	0.262742	0.0855806	0.549247	protein_coding	CG17167
FBgn0034158	0.262455	0.120625	0.639607	protein_coding	CG5522
FBgn0015799	0.262446	0.092744	0.575252	protein_coding	Rbf
FBgn0041627	0.262434	0.257106	0.834772	protein_coding	Ku80
FBgn0029532	0.262204	0.357115	0.906011	protein_coding	CG13361
FBgn0051029	0.262096	0.358325	0.906011	protein_coding	CG31029
FBgn0039449	0.261899	0.310173	0.879661	protein_coding	CG6425
FBgn0086674	0.261362	0.029436	0.309424	protein_coding	Tpst
FBgn0036749	0.261285	0.447856	0.941426	protein_coding	CG7460
FBgn0051360	0.261208	0.131264	0.662801	protein_coding	CG31360
FBgn0015035	0.260408	0.443868	0.939545	protein_coding	Cyp4e3
FBgn0032728	0.260328	0.0425933	0.377412	protein_coding	Tango6
FBgn0037758	0.260322	0.0101541	0.158993	protein_coding	CG9467
FBgn0039836	0.260267	0.250298	0.829774	protein_coding	CG1750
FBgn0051390	0.260105	0.148634	0.700819	protein_coding	MED7
FBgn0037082	0.25998	0.170912	0.736495	protein_coding	CG5664
FBgn0038653	0.2598	0.326911	0.889118	protein_coding	Octalpha2R
FBgn0039380	0.259735	0.395613	0.928117	protein_coding	CG5890
FBgn0028422	0.259256	0.257392	0.834772	protein_coding	GluRIID
FBgn0038974	0.258884	0.185264	0.757603	protein_coding	CG5377
FBgn0036287	0.258582	0.317173	0.883343	protein_coding	CG10663
FBgn0039694	0.258473	0.298051	0.868059	protein_coding	fig
FBgn0051648	0.258466	0.0762587	0.517253	protein_coding	CG31648
FBgn0051089	0.258458	0.101038	0.597035	protein_coding	CG31089
FBgn0034489	0.258432	0.576059	0.972685	protein_coding	ppk6
FBgn0035400	0.258414	0.0399161	0.36135	protein_coding	CG11537
FBgn0085227	0.257881	0.104277	0.603687	protein_coding	CG34198
FBgn0036337	0.257853	0.0114193	0.172618	protein_coding	AdenoK
FBgn0035165	0.256771	0.0258637	0.285072	protein_coding	CG13887
FBgn0003963	0.256446	0.223401	0.805281	protein_coding	ush
FBgn0004911	0.256291	0.425546	0.939545	ncRNA	asRNA:Eig63F-2
FBgn0040351	0.256106	0.30238	0.8737	protein_coding	CG11638
FBgn0087012	0.256043	0.467708	0.946549	protein_coding	5-HT2A
FBgn0263027	0.255652	0.343227	0.894819	protein_coding	CG43322
FBgn0051457	0.255648	0.242029	0.822113	protein_coding	CG31457
FBgn0051469	0.25562	0.14728	0.697856	protein_coding	CG31469
FBgn0264389	0.255551	0.0726466	0.507945	protein_coding	opm
FBgn0010389	0.255537	0.287071	0.861995	protein_coding	htl
FBgn0031629	0.254451	0.332253	0.889118	NA	NA
FBgn0053116	0.254274	0.159491	0.717186	protein_coding	CG33116
FBgn0015926	0.253809	0.399109	0.930439	protein_coding	dah
FBgn0031099	0.253803	0.104706	0.604952	protein_coding	CG17065
FBgn0263745	0.252559	0.280315	0.858753	pseudogene	CR43670
FBgn0050033	0.252528	0.504251	0.956954	protein_coding	CG30033
FBgn0032084	0.252473	0.31159	0.880807	protein_coding	CG13101
FBgn0264324	0.252367	0.143886	0.689935	protein_coding	spg
FBgn0053470	0.252363	0.0847496	0.545735	protein_coding	CG33470
FBgn0039290	0.252131	0.218899	0.802175	protein_coding	CG13654
FBgn0038865	0.251855	0.396687	0.929275	protein_coding	cDIP
FBgn0016698	0.25179	0.103102	0.600682	protein_coding	Ptpa
FBgn0050463	0.251456	0.0211918	0.254991	protein_coding	Pgant9
FBgn0263973	0.251439	0.241128	0.820314	protein_coding	jv
FBgn0033429	0.251408	0.0992854	0.592516	protein_coding	CG12929
FBgn0052112	0.251294	0.0650015	0.479565	protein_coding	CG32112
FBgn0039128	0.251131	0.354944	0.904434	protein_coding	CG13599
FBgn0036056	0.250616	0.290435	0.864471	protein_coding	CG6709
FBgn0051935	0.24994	0.0796702	0.529747	protein_coding	CG31935
FBgn0039462	0.249879	0.258293	0.835667	protein_coding	CG14252
FBgn0033523	0.249613	0.102057	0.59816	protein_coding	CG12895
FBgn0037921	0.24947	0.38012	0.919133	protein_coding	CG6808
FBgn0001990	0.249448	0.192555	0.770124	protein_coding	wek
FBgn0040942	0.249365	0.282844	0.860395	protein_coding	CG12643
FBgn0039740	0.249177	0.117969	0.636888	protein_coding	ZIPIC
FBgn0051100	0.248891	0.576315	0.972685	protein_coding	CG31100
FBgn0031260	0.248743	0.0529081	0.430315	protein_coding	Spp
FBgn0004387	0.24858	0.210558	0.790933	protein_coding	Klp98A
FBgn0028956	0.248305	0.118541	0.637904	protein_coding	mthl3
FBgn0027836	0.247535	0.025876	0.285072	protein_coding	Dgp-1
FBgn0032726	0.247528	0.255195	0.833663	protein_coding	CG10621
FBgn0037537	0.247424	0.0148195	0.203063	protein_coding	CG2767
FBgn0263106	0.24741	0.4578	0.941615	protein_coding	DnaJ-1
FBgn0029161	0.24706	0.0193595	0.242032	protein_coding	slmo
FBgn0034655	0.246918	0.435867	0.939545	protein_coding	CG10307
FBgn0031116	0.246799	0.322407	0.886872	protein_coding	CG1695
FBgn0003701	0.246735	0.382224	0.922485	protein_coding	thr
FBgn0050022	0.246637	0.0346982	0.33881	protein_coding	CG30022
FBgn0260768	0.246582	0.263796	0.84257	protein_coding	CG42566
FBgn0033744	0.246432	0.0715447	0.504415	protein_coding	Dh44-R2
FBgn0031183	0.246224	0.0430805	0.378935	protein_coding	CG14621
FBgn0015222	0.246009	0.0799256	0.530096	protein_coding	Fer1HCH
FBgn0027864	0.245705	0.154687	0.707698	protein_coding	Ogg1
FBgn0035449	0.245133	0.0387525	0.356001	protein_coding	CG14971
FBgn0026432	0.244999	0.145551	0.692465	protein_coding	Grip163
FBgn0034913	0.244971	0.0648693	0.479565	protein_coding	Snap29
FBgn0036179	0.244921	0.426193	0.939545	protein_coding	CG7368
FBgn0053129	0.244868	0.0658702	0.48268	protein_coding	CG33129
FBgn0053497	0.244867	0.330066	0.889118	protein_coding	Sdic2
FBgn0029663	0.244638	0.424863	0.939545	protein_coding	CG10804
FBgn0265205	0.244467	0.331657	0.889118	ncRNA	lncRNA:CR44265
FBgn0010548	0.244387	0.222483	0.805024	protein_coding	Aldh-III
FBgn0003979	0.243962	0.24106	0.820314	protein_coding	Vm26Aa
FBgn0032024	0.243894	0.389703	0.927082	protein_coding	CG14273
FBgn0031554	0.243878	0.315058	0.883343	protein_coding	CG15418
FBgn0259989	0.243839	0.200683	0.781679	protein_coding	CG42486
FBgn0086348	0.24379	0.584111	0.973707	protein_coding	se
FBgn0031601	0.243748	0.124707	0.647372	protein_coding	Dim1
FBgn0002948	0.243561	0.32193	0.886321	protein_coding	nod
FBgn0027514	0.243552	0.133884	0.66881	protein_coding	CG1024
FBgn0003499	0.243519	0.316144	0.883343	protein_coding	sr
FBgn0035335	0.243191	0.0724985	0.50785	protein_coding	mRpL23
FBgn0031643	0.242898	0.0728797	0.508186	protein_coding	CG3008
FBgn0039890	0.242844	0.0604272	0.461435	protein_coding	ABCD
FBgn0262364	0.242744	0.360367	0.906734	protein_coding	CG43062
FBgn0263314	0.242561	0.35166	0.902177	protein_coding	CG43400
FBgn0284249	0.242369	0.15517	0.708158	protein_coding	Adf1
FBgn0053506	0.242347	0.0957215	0.586473	protein_coding	CG33506
FBgn0033313	0.242337	0.129927	0.66239	protein_coding	Cirl
FBgn0267023	0.242121	0.382908	0.923088	ncRNA	asRNA:CR45467
FBgn0051446	0.241739	0.161349	0.719826	protein_coding	CG31446
FBgn0050285	0.241529	0.329834	0.889118	protein_coding	CG30285
FBgn0036057	0.241465	0.393475	0.92774	protein_coding	Hez
FBgn0033232	0.241431	0.125744	0.651347	protein_coding	CG12159
FBgn0032144	0.241318	0.183843	0.755458	protein_coding	CG17633
FBgn0033994	0.241229	0.294115	0.866331	protein_coding	CG7544
FBgn0026592	0.241183	0.329728	0.889118	protein_coding	Fie
FBgn0034296	0.240994	0.143837	0.689935	protein_coding	CG10912
FBgn0011205	0.240938	0.0632913	0.473635	protein_coding	fbl
FBgn0013277	0.240803	2.67384e-07	3.25397e-05	protein_coding	Hsp70Ba
FBgn0035462	0.240368	0.199726	0.78023	protein_coding	IntS10
FBgn0034761	0.240339	0.419099	0.938195	protein_coding	CG4250
FBgn0034114	0.2402	0.135413	0.672726	protein_coding	CG4282
FBgn0037010	0.240199	0.200704	0.781679	NA	NA
FBgn0267481	0.239985	0.255672	0.834647	ncRNA	asRNA:CR45831
FBgn0033900	0.239809	0.156839	0.712258	protein_coding	CysRS-m
FBgn0000032	0.239501	0.0318223	0.321703	protein_coding	Acph-1
FBgn0043010	0.239381	0.101739	0.59816	protein_coding	Fsn
FBgn0036007	0.239329	0.133985	0.66881	protein_coding	path
FBgn0030160	0.239253	0.255922	0.834772	protein_coding	CG9691
FBgn0029825	0.239138	0.278786	0.857648	protein_coding	CG12728
FBgn0010651	0.23909	0.834684	0.992671	protein_coding	MFS14
FBgn0030482	0.239041	0.338805	0.893537	protein_coding	CG1673
FBgn0032414	0.239009	0.447351	0.941102	protein_coding	CG17211
FBgn0002036	0.238944	0.137476	0.677258	protein_coding	CG10561
FBgn0029094	0.238716	0.1408	0.681741	protein_coding	asf1
FBgn0032900	0.238236	0.3233	0.887036	protein_coding	CG14401
FBgn0039944	0.23821	0.0394031	0.358435	protein_coding	CG17162
FBgn0036948	0.238092	0.83878	0.992671	protein_coding	CG7298
FBgn0002466	0.237814	0.316874	0.883343	protein_coding	sti
FBgn0002869	0.237614	0.258685	0.836526	protein_coding	MtnB
FBgn0053198	0.237468	0.233058	0.813578	protein_coding	pen-2
FBgn0032733	0.237417	0.151126	0.703336	protein_coding	CG15170
FBgn0015872	0.23734	0.111253	0.622217	protein_coding	Drip
FBgn0037163	0.237323	0.191711	0.769914	protein_coding	laza
FBgn0034379	0.237289	0.211486	0.792917	protein_coding	CG15073
FBgn0035325	0.237162	0.352828	0.903834	protein_coding	CG13806
FBgn0039594	0.237152	0.326653	0.889118	protein_coding	snu
FBgn0036996	0.236951	0.240956	0.820309	protein_coding	mag
FBgn0003386	0.236682	0.326095	0.889118	protein_coding	Shaw
FBgn0032670	0.236459	0.261821	0.841293	protein_coding	CG5783
FBgn0260746	0.236367	0.347835	0.89749	protein_coding	Ect3
FBgn0035518	0.236174	0.163509	0.722747	protein_coding	CG15011
FBgn0262057	0.23608	0.288589	0.863136	protein_coding	Spn77Ba
FBgn0030506	0.23591	0.0994693	0.592516	protein_coding	DNAlig4
FBgn0263050	0.235786	0.278828	0.857648	protein_coding	CG43345
FBgn0010385	0.235785	0.174678	0.745054	protein_coding	Def
FBgn0033113	0.23578	0.160056	0.718181	protein_coding	Spn42Dc
FBgn0052544	0.23571	0.357509	0.906011	protein_coding	CG32544
FBgn0031877	0.235386	0.161059	0.719826	protein_coding	Hmgcl
FBgn0027563	0.235191	0.390459	0.927367	protein_coding	CG9631
FBgn0051354	0.235118	0.284326	0.860395	protein_coding	Hsp70Bbb
FBgn0266168	0.234957	0.525397	0.961487	ncRNA	lncRNA:CR44874
FBgn0030008	0.234693	0.344422	0.894819	protein_coding	CG2129
FBgn0034145	0.234584	0.303133	0.8737	protein_coding	CG5065
FBgn0032129	0.234418	0.311124	0.880691	protein_coding	jp
FBgn0051774	0.234385	0.482635	0.95122	protein_coding	fred
FBgn0029969	0.234289	0.133594	0.66881	protein_coding	CG10932
FBgn0265140	0.23421	0.0167422	0.222936	protein_coding	Meltrin
FBgn0262029	0.233829	0.378886	0.918692	protein_coding	d
FBgn0030351	0.233327	0.154518	0.707398	protein_coding	CG1840
FBgn0031115	0.233143	0.136958	0.676627	protein_coding	CG11710
FBgn0030966	0.23302	0.14571	0.692465	protein_coding	shop
FBgn0039528	0.232103	0.0533924	0.431457	protein_coding	dsd
FBgn0260407	0.232052	0.133634	0.66881	protein_coding	mRpS23
FBgn0030870	0.231682	0.243396	0.823226	protein_coding	CG6398
FBgn0013749	0.231587	0.0275957	0.29643	protein_coding	Arf102F
FBgn0038833	0.231444	0.298462	0.868601	protein_coding	CG15696
FBgn0034741	0.231336	0.411245	0.933799	protein_coding	CG4269
FBgn0016975	0.231315	0.279068	0.857648	protein_coding	stnB
FBgn0016976	0.231315	0.279068	0.857648	protein_coding	stnA
FBgn0027556	0.230703	0.15772	0.713453	protein_coding	CG4928
FBgn0027101	0.230669	0.0495224	0.413648	protein_coding	Dyrk3
FBgn0031498	0.230479	0.133801	0.66881	protein_coding	CG17260
FBgn0037816	0.230471	0.241962	0.822113	protein_coding	CG6345
FBgn0039875	0.230338	0.0769287	0.520107	protein_coding	sip3
FBgn0026439	0.230318	0.248614	0.826998	protein_coding	Eaat1
FBgn0034405	0.229968	0.262796	0.841397	protein_coding	Jheh2
FBgn0030802	0.229881	0.0850738	0.547456	protein_coding	DENR
FBgn0026438	0.229715	0.432569	0.939545	protein_coding	Eaat2
FBgn0032871	0.229412	0.207342	0.787594	protein_coding	CG2611
FBgn0035331	0.2292	0.843401	0.992671	protein_coding	MsR1
FBgn0034179	0.2291	0.258968	0.836561	protein_coding	CG6805
FBgn0034307	0.229054	0.230145	0.810193	protein_coding	CG10914
FBgn0030593	0.22864	0.27828	0.857648	protein_coding	CG9512
FBgn0031676	0.228585	0.0367911	0.349171	protein_coding	senju
FBgn0028424	0.228489	0.108669	0.61522	protein_coding	JhI-26
FBgn0035811	0.228363	0.332202	0.889118	protein_coding	Mcad
FBgn0037709	0.228032	0.0519731	0.425801	protein_coding	CG8199
FBgn0034335	0.227923	0.291223	0.864575	protein_coding	GstE1
FBgn0041156	0.227428	0.0524119	0.428112	protein_coding	exex
FBgn0035916	0.227245	0.202122	0.783591	protein_coding	GAPsec
FBgn0037515	0.227158	0.331968	0.889118	protein_coding	Sp7
FBgn0262517	0.227063	0.0188138	0.238395	protein_coding	Ltn1
FBgn0030305	0.22705	0.139009	0.678304	protein_coding	Uba5
FBgn0260635	0.226929	0.0315763	0.320564	protein_coding	Diap1
FBgn0039056	0.226875	0.211883	0.793552	protein_coding	CenB1A
FBgn0034402	0.226802	0.258884	0.836561	protein_coding	CG15084
FBgn0038475	0.226452	0.227753	0.806954	protein_coding	Keap1
FBgn0261989	0.226364	0.202927	0.785205	protein_coding	CG42807
FBgn0260780	0.226355	0.301705	0.8737	protein_coding	wisp
FBgn0050481	0.226231	0.10457	0.604533	protein_coding	mRpL53
FBgn0038804	0.226007	0.230415	0.810193	protein_coding	CG10877
FBgn0035726	0.225934	0.0369541	0.350026	protein_coding	CG9953
FBgn0028327	0.225918	0.0588827	0.455956	protein_coding	l(1)G0320
FBgn0031638	0.225722	0.149596	0.702173	protein_coding	CG11927
FBgn0035443	0.225669	0.296326	0.867566	protein_coding	CG12010
FBgn0036053	0.225484	0.0517021	0.424841	protein_coding	iPLA2-VIA
FBgn0039430	0.225349	0.254395	0.833512	protein_coding	CG5455
FBgn0051523	0.225232	0.18374	0.755458	protein_coding	CG31523
FBgn0002641	0.225176	0.210275	0.790555	protein_coding	mal
FBgn0033973	0.225001	0.214385	0.796715	protein_coding	HPS1
FBgn0036922	0.22489	0.343282	0.894819	protein_coding	CG14182
FBgn0038017	0.224811	0.356799	0.90594	protein_coding	CG4115
FBgn0250869	0.22476	0.116771	0.634611	protein_coding	CG42240
FBgn0036738	0.224555	0.24344	0.823226	protein_coding	CG7542
FBgn0261089	0.224528	0.277103	0.856805	protein_coding	Sytalpha
FBgn0023530	0.224335	0.0883905	0.560356	protein_coding	CG3740
FBgn0033993	0.22425	0.308482	0.877158	protein_coding	CG8089
FBgn0036964	0.224203	0.188129	0.763154	protein_coding	FRG1
FBgn0031914	0.224156	0.181213	0.753248	protein_coding	CG5973
FBgn0033999	0.223834	0.170994	0.736495	protein_coding	CG8093
FBgn0033226	0.223646	0.223988	0.805281	protein_coding	puml
FBgn0260960	0.223161	0.201974	0.783591	protein_coding	Baldspot
FBgn0030100	0.223047	0.316112	0.883343	protein_coding	CG12106
FBgn0034248	0.222831	0.169709	0.734949	protein_coding	CG14483
FBgn0012036	0.222657	0.138974	0.678304	protein_coding	Aldh
FBgn0003429	0.222589	0.319856	0.884538	protein_coding	slo
FBgn0261631	0.222316	0.247557	0.826552	protein_coding	CG42714
FBgn0030688	0.222261	0.0746804	0.51237	protein_coding	CG8952
FBgn0029529	0.222155	0.100681	0.59566	protein_coding	CG13365
FBgn0036819	0.222023	0.271679	0.850513	protein_coding	Dysb
FBgn0029172	0.221776	0.325946	0.889118	protein_coding	Fad2
FBgn0030230	0.221746	0.329331	0.889118	protein_coding	Rph
FBgn0039816	0.221684	0.458847	0.941821	protein_coding	CG11317
FBgn0036286	0.22168	0.0692384	0.49565	protein_coding	CG10616
FBgn0262599	0.221569	0.339237	0.893537	protein_coding	SmydA-3
FBgn0033691	0.221523	0.0513926	0.423042	protein_coding	CG8860
FBgn0045759	0.220814	0.395567	0.928117	protein_coding	bin
FBgn0050390	0.220814	0.246774	0.826552	protein_coding	Sgf29
FBgn0031871	0.220651	0.11586	0.632284	protein_coding	Fgop2
FBgn0264958	0.22055	0.433369	0.939545	ncRNA	lncRNA:CR44127
FBgn0026197	0.220482	0.435751	0.939545	ncRNA	lncRNA:noe
FBgn0031518	0.220464	0.115365	0.63054	protein_coding	CG3277
FBgn0038376	0.22032	0.0115875	0.174339	protein_coding	Hmt-1
FBgn0010435	0.220261	0.225651	0.806521	protein_coding	emp
FBgn0034626	0.220249	0.200284	0.780948	protein_coding	CG10795
FBgn0026479	0.220164	0.0397693	0.3607	protein_coding	Drp1
FBgn0035475	0.220092	0.234872	0.814561	protein_coding	CG10866
FBgn0027259	0.220057	0.390978	0.927367	protein_coding	Kmn1
FBgn0031690	0.219976	0.495364	0.954882	protein_coding	CG7742
FBgn0014007	0.219956	0.0963686	0.58862	protein_coding	Ptp69D
FBgn0039789	0.21994	0.512193	0.958282	protein_coding	CG9717
FBgn0033527	0.219936	0.256737	0.834772	protein_coding	CG11777
FBgn0021738	0.219886	0.472911	0.947018	protein_coding	Crg-1
FBgn0052451	0.219751	0.0184305	0.237741	protein_coding	SPoCk
FBgn0039690	0.219723	0.141674	0.683077	protein_coding	Gnpnat
FBgn0033086	0.219639	0.1615	0.719826	protein_coding	CG9410
FBgn0023522	0.219228	0.126652	0.654642	protein_coding	CG11596
FBgn0003141	0.219175	0.120652	0.639607	protein_coding	pr
FBgn0025700	0.219045	0.0681951	0.492213	protein_coding	CG5885
FBgn0026402	0.218899	0.284776	0.860395	protein_coding	NiPp1
FBgn0035374	0.218693	0.062033	0.467753	protein_coding	mRpS35
FBgn0038672	0.218656	0.15401	0.706081	protein_coding	CG6005
FBgn0037122	0.218588	0.453601	0.941615	protein_coding	CG14570
FBgn0011016	0.218525	0.0412245	0.370058	protein_coding	SsRbeta
FBgn0027903	0.218176	0.283545	0.860395	protein_coding	Pol31
FBgn0035612	0.218113	0.147494	0.69818	protein_coding	frm
FBgn0062449	0.217994	0.124167	0.646662	protein_coding	CG13197
FBgn0013278	0.217922	0.431905	0.939545	protein_coding	Hsp70Bb
FBgn0003495	0.2179	0.433047	0.939545	protein_coding	spz
FBgn0035708	0.217831	0.254682	0.833512	protein_coding	axed
FBgn0267127	0.217815	0.413896	0.934725	ncRNA	lncRNA:CR45567
FBgn0020386	0.217777	0.391797	0.927367	protein_coding	Pdk1
FBgn0037405	0.217742	0.0577375	0.451012	protein_coding	CG1077
FBgn0035980	0.217682	0.232456	0.813259	protein_coding	mRRF1
FBgn0020407	0.217647	0.199594	0.78023	protein_coding	asun
FBgn0038947	0.217601	0.013446	0.191796	protein_coding	Sar1
FBgn0025625	0.217356	0.277924	0.857648	protein_coding	Sik2
FBgn0031544	0.217283	0.022601	0.26588	protein_coding	CG17593
FBgn0032897	0.217206	0.189193	0.76521	protein_coding	CG9336
FBgn0029689	0.217205	0.204567	0.786661	protein_coding	CG6428
FBgn0035206	0.217172	0.0222734	0.263201	protein_coding	sturkopf
FBgn0286027	0.217106	0.239302	0.819625	protein_coding	Rnmt
FBgn0033207	0.217079	0.0270038	0.294118	protein_coding	CG12826
FBgn0038437	0.217044	0.318177	0.884091	protein_coding	Sdhaf3
FBgn0011715	0.217039	0.0810677	0.531739	protein_coding	Snr1
FBgn0001186	0.217024	0.25744	0.834772	protein_coding	Hex-A
FBgn0031268	0.216652	0.277343	0.856805	protein_coding	cold
FBgn0035026	0.216617	0.15015	0.702173	protein_coding	Fcp1
FBgn0039293	0.216496	0.14958	0.702173	protein_coding	Alg9
FBgn0029942	0.216476	0.248933	0.827405	protein_coding	CG2059
FBgn0038256	0.216401	0.396294	0.929035	protein_coding	CG7530
FBgn0032603	0.216135	0.312893	0.88158	protein_coding	CG17928
FBgn0000543	0.216119	0.199441	0.78023	protein_coding	ecd
FBgn0031307	0.215745	0.269626	0.849491	protein_coding	MFS3
FBgn0030943	0.21572	0.165482	0.72461	protein_coding	Nup35
FBgn0033192	0.21565	0.42376	0.939545	protein_coding	Corin
FBgn0025469	0.215594	0.101529	0.598101	protein_coding	slv
FBgn0036512	0.215403	0.128802	0.662051	protein_coding	CG16979
FBgn0086779	0.215372	0.0577486	0.451012	protein_coding	step
FBgn0030798	0.21531	0.476062	0.947894	protein_coding	CG13003
FBgn0010549	0.21519	0.677903	0.986095	protein_coding	l(2)03659
FBgn0263996	0.214885	0.247602	0.826552	protein_coding	CG43739
FBgn0035154	0.21471	0.244759	0.824916	protein_coding	hiro
FBgn0023416	0.214669	0.438693	0.939545	protein_coding	Ac3
FBgn0034911	0.214656	0.471814	0.947018	protein_coding	GlyT
FBgn0052280	0.214503	0.158022	0.713587	protein_coding	CG32280
FBgn0001112	0.214478	0.141076	0.681906	protein_coding	Gld
FBgn0038199	0.214082	0.220132	0.80321	protein_coding	CCHa1
FBgn0030364	0.214053	0.114261	0.629155	protein_coding	Lsm12a
FBgn0033468	0.213763	0.317465	0.88346	protein_coding	CG1418
FBgn0034961	0.213589	0.165576	0.72461	protein_coding	CG3163
FBgn0010612	0.213411	0.0831515	0.540148	protein_coding	ATPsynG
FBgn0036008	0.213372	0.189813	0.766748	protein_coding	CG3408
FBgn0063298	0.213139	0.303502	0.8737	ncRNA	asRNA:CR31429
FBgn0267347	0.213122	0.371601	0.912988	protein_coding	squ
FBgn0037917	0.213109	0.0918716	0.572426	protein_coding	wkd
FBgn0000075	0.212911	0.522558	0.96148	protein_coding	amd
FBgn0034750	0.212855	0.187434	0.761299	protein_coding	CG3732
FBgn0031804	0.212685	0.370159	0.912199	protein_coding	CG9500
FBgn0031909	0.212469	0.171139	0.736495	protein_coding	CG5181
FBgn0035515	0.212426	0.199079	0.78023	protein_coding	CG14997
FBgn0029861	0.212126	0.193522	0.771125	protein_coding	CG3815
FBgn0029975	0.212094	0.216192	0.799221	protein_coding	spidey
FBgn0260755	0.212067	0.176037	0.748096	protein_coding	CG42553
FBgn0038261	0.212062	0.419461	0.938274	protein_coding	CG14856
FBgn0028671	0.21185	0.149061	0.702173	protein_coding	Vha100-1
FBgn0030612	0.211805	0.0736052	0.510056	protein_coding	CG5599
FBgn0028499	0.211557	0.306169	0.875794	protein_coding	CG7985
FBgn0032049	0.211429	0.201203	0.782193	protein_coding	Bace
FBgn0005664	0.211366	0.138079	0.677258	protein_coding	Crys
FBgn0033997	0.211328	0.433755	0.939545	pseudogene	Ir51a
FBgn0033769	0.211191	0.129651	0.66239	protein_coding	CG8768
FBgn0037371	0.211168	0.0835363	0.541051	protein_coding	Sym
FBgn0025355	0.211102	0.197771	0.777652	protein_coding	SuUR
FBgn0266540	0.211102	0.197771	0.777652	protein_coding	CG45101
FBgn0042627	0.210911	0.341884	0.894819	protein_coding	FASN2
FBgn0032246	0.210607	0.0589035	0.455956	protein_coding	Wdfy2
FBgn0265447	0.210579	0.660031	0.986095	ncRNA	lncRNA:CR44347
FBgn0039689	0.210499	0.0599007	0.459246	protein_coding	CIA30
FBgn0030341	0.210407	0.0961992	0.587958	protein_coding	p24-1
FBgn0031284	0.210152	0.15664	0.711689	protein_coding	PGAP2
FBgn0040323	0.209908	0.37927	0.918711	protein_coding	GNBP1
FBgn0267972	0.209868	0.184657	0.755765	protein_coding	Der-1
FBgn0027950	0.209802	0.19175	0.769914	protein_coding	MBD-like
FBgn0031693	0.20973	0.177875	0.750655	protein_coding	Cyp4ac1
FBgn0261053	0.20967	0.393857	0.927846	protein_coding	Cad86C
FBgn0030797	0.20961	0.449918	0.941615	protein_coding	CG13004
FBgn0037796	0.209574	0.331218	0.889118	protein_coding	CG12814
FBgn0039486	0.209077	0.153413	0.706081	protein_coding	CAH9
FBgn0259708	0.208727	0.303968	0.8737	protein_coding	CG42362
FBgn0259709	0.208727	0.303968	0.8737	protein_coding	CG42363
FBgn0261786	0.208609	0.0900996	0.567268	protein_coding	mi
FBgn0013732	0.208388	0.470972	0.947018	protein_coding	sced
FBgn0030555	0.207997	0.0994271	0.592516	protein_coding	Fbxl4
FBgn0052196	0.207927	0.159994	0.718181	protein_coding	CG32196
FBgn0259998	0.207835	0.239335	0.819625	protein_coding	CG17571
FBgn0046301	0.207779	0.105149	0.606786	protein_coding	CG7148
FBgn0051159	0.207661	0.179941	0.752067	protein_coding	mRRF2
FBgn0051633	0.207614	0.187217	0.761299	protein_coding	CG31633
FBgn0031738	0.207549	0.150562	0.702536	protein_coding	CG9171
FBgn0052205	0.207497	0.51139	0.958282	ncRNA	hpRNA:CR32205
FBgn0033371	0.20739	0.414777	0.934725	protein_coding	CNT1
FBgn0283649	0.207048	0.193529	0.771125	protein_coding	elgi
FBgn0011708	0.207022	0.0996258	0.5927	protein_coding	Syx5
FBgn0003748	0.206992	0.0388151	0.356001	protein_coding	Treh
FBgn0028541	0.206919	0.105777	0.608375	protein_coding	TM9SF4
FBgn0040322	0.206806	0.401174	0.930439	protein_coding	GNBP2
FBgn0052179	0.206768	0.167056	0.727236	protein_coding	Krn
FBgn0033906	0.206501	0.0223573	0.263734	protein_coding	ReepB
FBgn0031089	0.206385	0.442705	0.939545	protein_coding	CG9572
FBgn0031549	0.206342	0.323481	0.887036	protein_coding	Spindly
FBgn0030323	0.206341	0.296938	0.867566	protein_coding	Vlet
FBgn0261509	0.206285	0.48863	0.952684	protein_coding	haf
FBgn0026582	0.206226	0.283992	0.860395	protein_coding	Hmg-2
FBgn0032879	0.206111	0.45379	0.941615	protein_coding	CarT
FBgn0053966	0.205981	0.13393	0.66881	protein_coding	CG33966
FBgn0004431	0.205964	0.439728	0.939545	protein_coding	LysX
FBgn0010340	0.205762	0.157918	0.713453	protein_coding	140up
FBgn0052221	0.20561	0.14715	0.697752	protein_coding	CG32221
FBgn0063368	0.205595	0.641171	0.982921	protein_coding	Gpb5
FBgn0032167	0.205534	0.24812	0.826552	protein_coding	CG5853
FBgn0020887	0.205449	0.110124	0.619092	protein_coding	Su(z)12
FBgn0038063	0.205446	0.433943	0.939545	protein_coding	Octbeta2R
FBgn0039525	0.205311	0.234095	0.814561	protein_coding	CG5646
FBgn0038088	0.204961	0.253255	0.833405	protein_coding	CG10126
FBgn0038135	0.204954	0.196365	0.775528	protein_coding	CG8773
FBgn0013953	0.204699	0.452033	0.941615	protein_coding	Esp
FBgn0039145	0.204632	0.179128	0.750967	protein_coding	CG6000
FBgn0036684	0.204625	0.247206	0.826552	protein_coding	CG3764
FBgn0038901	0.204615	0.30561	0.875601	protein_coding	Burs
FBgn0028496	0.204516	0.330108	0.889118	protein_coding	CG30116
FBgn0029664	0.204387	0.162167	0.721872	protein_coding	CG10802
FBgn0045761	0.204342	0.134531	0.669878	protein_coding	CHKov1
FBgn0034053	0.20427	0.494408	0.954516	protein_coding	Cyp4aa1
FBgn0028741	0.203828	0.16388	0.723669	protein_coding	fab1
FBgn0050467	0.203827	0.28447	0.860395	protein_coding	CG30467
FBgn0010803	0.203814	0.112186	0.623224	protein_coding	TrpRS
FBgn0037018	0.203781	0.122978	0.643609	protein_coding	CG4042
FBgn0015000	0.203755	0.0693623	0.496168	protein_coding	betaggt-I
FBgn0034270	0.203403	0.280544	0.858753	protein_coding	PIG-A
FBgn0038128	0.203241	0.319582	0.884538	protein_coding	Ravus
FBgn0035268	0.203137	0.108723	0.61522	protein_coding	CG8001
FBgn0029508	0.203105	0.244277	0.824317	protein_coding	Tsp42Ea
FBgn0259896	0.203036	0.284926	0.860395	protein_coding	NimC1
FBgn0038765	0.203017	0.418278	0.938027	protein_coding	CG4424
FBgn0038897	0.202871	0.251752	0.832592	protein_coding	CG5849
FBgn0063497	0.202792	0.378131	0.917555	protein_coding	GstE3
FBgn0263504	0.202654	0.243839	0.824285	ncRNA	lncRNA:CR43493
FBgn0036897	0.202545	0.218494	0.802175	protein_coding	Rnf146
FBgn0011335	0.202497	0.215673	0.798443	protein_coding	vers
FBgn0034521	0.202491	0.311241	0.880691	protein_coding	Mgat1
FBgn0034113	0.202165	0.182078	0.753966	protein_coding	CG8060
FBgn0036806	0.202078	0.290244	0.864171	protein_coding	Cyp12c1
FBgn0039946	0.201823	0.367669	0.912199	protein_coding	ATbp
FBgn0041195	0.201723	0.419251	0.938195	protein_coding	Pkd2
FBgn0058439	0.201289	0.246505	0.826325	protein_coding	CG40439
FBgn0037912	0.201175	0.227194	0.806798	protein_coding	sea
FBgn0037021	0.200834	0.297433	0.867566	protein_coding	CG11399
FBgn0000326	0.200735	0.315289	0.883343	protein_coding	clt
FBgn0037592	0.200724	0.20214	0.783591	protein_coding	CG11737
FBgn0050005	0.200609	0.15253	0.706081	protein_coding	GstT2
FBgn0004901	0.200589	0.248666	0.826998	protein_coding	Prat
FBgn0025879	0.200529	0.201036	0.78212	protein_coding	Timp
FBgn0039117	0.200527	0.214537	0.796972	protein_coding	tst
FBgn0265413	0.200258	0.109505	0.618195	protein_coding	CG44325
FBgn0259242	0.199964	0.498991	0.9564	protein_coding	CG42340
FBgn0260855	0.19959	0.0683778	0.493058	protein_coding	Sec22
FBgn0050046	0.199533	0.414647	0.934725	protein_coding	CG30046
FBgn0030088	0.199446	0.214178	0.796532	protein_coding	Arfrp1
FBgn0036553	0.199308	0.398751	0.930439	protein_coding	CG17027
FBgn0266445	0.199259	0.385004	0.924664	protein_coding	CG45075
FBgn0000394	0.198993	0.333333	0.890331	protein_coding	cv
FBgn0052190	0.198689	0.0913512	0.571465	protein_coding	NUCB1
FBgn0031344	0.198314	0.240808	0.820309	protein_coding	CG7420
FBgn0036934	0.198194	0.434583	0.939545	protein_coding	sNPF-R
FBgn0003227	0.19802	0.440669	0.939545	protein_coding	rec
FBgn0036481	0.197899	0.408663	0.932317	protein_coding	CG16959
FBgn0267815	0.197796	0.431915	0.939545	ncRNA	asRNA:CR46140
FBgn0032713	0.197754	0.35469	0.904363	protein_coding	Ugt36D1
FBgn0023511	0.197731	0.0687996	0.494273	protein_coding	Edem1
FBgn0032633	0.197562	0.237201	0.816779	protein_coding	Lrch
FBgn0011260	0.197308	0.284197	0.860395	protein_coding	Sema2a
FBgn0040344	0.196949	0.0874018	0.557287	protein_coding	Lztr1
FBgn0034315	0.196751	0.0994716	0.592516	protein_coding	CG5721
FBgn0036950	0.196711	0.655124	0.98547	protein_coding	CG6996
FBgn0030790	0.196684	0.0983672	0.591067	protein_coding	CG4768
FBgn0259212	0.196591	0.103626	0.602414	protein_coding	cno
FBgn0260798	0.196569	0.116294	0.633371	protein_coding	Gprk1
FBgn0039064	0.196556	0.476613	0.948686	protein_coding	CG4467
FBgn0263766	0.196498	0.412713	0.934484	ncRNA	asRNA:CR43683
FBgn0039709	0.196345	0.491082	0.953489	protein_coding	Cad99C
FBgn0028397	0.196281	0.315296	0.883343	protein_coding	Tob
FBgn0003042	0.196194	0.324392	0.888519	protein_coding	Pc
FBgn0036986	0.196159	0.491125	0.953489	protein_coding	CG5282
FBgn0283437	0.196111	0.32153	0.885922	protein_coding	PPO1
FBgn0261801	0.196085	0.370105	0.912199	protein_coding	CG42747
FBgn0262871	0.195569	0.199633	0.78023	protein_coding	lute
FBgn0286203	0.195533	0.535238	0.962072	protein_coding	stw
FBgn0037345	0.195487	0.351254	0.901572	protein_coding	Rev7
FBgn0027505	0.195485	0.113497	0.626804	protein_coding	Rab3-GAP
FBgn0036892	0.195395	0.0361018	0.345092	protein_coding	Lon
FBgn0032812	0.195266	0.24513	0.824916	protein_coding	Hakai
FBgn0036623	0.195222	0.159097	0.716189	protein_coding	Agpat3
FBgn0028746	0.195208	0.13822	0.677258	protein_coding	CG18508
FBgn0039153	0.195036	0.193402	0.771125	protein_coding	GatB
FBgn0030655	0.19502	0.209678	0.789599	protein_coding	CG9213
FBgn0035405	0.194977	0.270162	0.849491	protein_coding	CG15812
FBgn0030791	0.194718	0.0985943	0.591398	protein_coding	CG9132
FBgn0034271	0.194659	0.231565	0.81221	protein_coding	Vps50
FBgn0012344	0.194433	0.469406	0.946869	protein_coding	Dh44
FBgn0032813	0.194281	0.545055	0.963909	protein_coding	PCNA2
FBgn0035295	0.194092	0.415153	0.934725	protein_coding	Cnb
FBgn0283438	0.194041	0.0244134	0.277241	protein_coding	CG46280
FBgn0058160	0.193971	0.0716809	0.504495	protein_coding	CG40160
FBgn0034025	0.19394	0.243437	0.823226	protein_coding	Pgant1
FBgn0037377	0.193908	0.270558	0.849491	protein_coding	CG1218
FBgn0050096	0.193673	0.434987	0.939545	protein_coding	CG30096
FBgn0031484	0.193629	0.150679	0.702536	protein_coding	CG3165
FBgn0033879	0.193398	0.148102	0.699585	protein_coding	Echs1
FBgn0038741	0.1933	0.387504	0.926206	protein_coding	CG17186
FBgn0022772	0.193286	0.398003	0.929866	NA	NA
FBgn0283510	0.19327	0.151232	0.703336	protein_coding	Pal1
FBgn0033373	0.193108	0.128843	0.662051	protein_coding	CG8080
FBgn0026181	0.1931	0.157711	0.713453	protein_coding	Rok
FBgn0034371	0.192914	0.151663	0.704391	protein_coding	Ntan1
FBgn0010225	0.192885	0.0986074	0.591398	protein_coding	Gel
FBgn0050187	0.192803	0.376703	0.916171	protein_coding	CG30187
FBgn0016126	0.192614	0.20188	0.783591	protein_coding	CaMKI
FBgn0026679	0.192478	0.130819	0.66239	protein_coding	IntS4
FBgn0027526	0.192353	0.162809	0.722004	protein_coding	Ublcp1
FBgn0040754	0.19208	0.183067	0.754927	protein_coding	CG17059
FBgn0034518	0.192048	0.320087	0.884538	protein_coding	CG13430
FBgn0032810	0.19203	0.341087	0.894265	protein_coding	CG13077
FBgn0034519	0.192024	0.334607	0.89169	protein_coding	BORCS7
FBgn0033921	0.191991	0.453495	0.941615	protein_coding	tej
FBgn0038692	0.191953	0.273636	0.854134	protein_coding	Gdn1
FBgn0267084	0.1919	0.392592	0.92774	ncRNA	asRNA:CR45528
FBgn0032214	0.191696	0.168115	0.730019	protein_coding	CG4968
FBgn0086356	0.191377	0.467348	0.946549	protein_coding	tum
FBgn0003023	0.191309	0.454218	0.941615	protein_coding	otu
FBgn0263606	0.191154	0.292907	0.865932	protein_coding	Hsc20
FBgn0086370	0.190976	0.263615	0.84231	protein_coding	sra
FBgn0050100	0.190877	0.252715	0.833405	protein_coding	CG30100
FBgn0259718	0.190877	0.252715	0.833405	protein_coding	CG42372
FBgn0034726	0.190873	0.308304	0.877158	protein_coding	Mes4
FBgn0037540	0.190795	0.36688	0.912199	protein_coding	Pbp95
FBgn0032699	0.190747	0.358643	0.906049	protein_coding	CG10383
FBgn0036480	0.190617	0.22317	0.805281	protein_coding	Cep135
FBgn0039196	0.190561	0.0466538	0.398074	protein_coding	CG17781
FBgn0034172	0.190365	0.112089	0.623224	protein_coding	CG6665
FBgn0004629	0.190334	0.187404	0.761299	protein_coding	Cys
FBgn0037473	0.190036	0.163252	0.722747	protein_coding	CG10068
FBgn0037011	0.190028	0.122255	0.642707	protein_coding	CG4858
FBgn0027865	0.189889	0.438843	0.939545	protein_coding	Tsp96F
FBgn0040319	0.18981	0.315805	0.883343	protein_coding	Gclc
FBgn0250851	0.189529	0.160496	0.719349	protein_coding	CG33981
FBgn0033816	0.189506	0.220355	0.80321	protein_coding	CG4679
FBgn0034396	0.189502	0.499608	0.956698	protein_coding	CG15097
FBgn0085208	0.189496	0.421046	0.939545	protein_coding	CG34179
FBgn0000055	0.18927	0.400305	0.930439	protein_coding	Adh
FBgn0016031	0.189239	0.291292	0.864575	protein_coding	lama
FBgn0053993	0.189176	0.493883	0.954026	protein_coding	CG33993
FBgn0038983	0.189142	0.585128	0.973707	protein_coding	CG5326
FBgn0050497	0.189071	0.098977	0.592138	NA	NA
FBgn0266526	0.189071	0.098977	0.592138	NA	NA
FBgn0051812	0.189	0.289505	0.863307	protein_coding	Tsen2
FBgn0002283	0.188916	0.204195	0.786197	protein_coding	l(3)73Ah
FBgn0086445	0.188618	0.350865	0.901207	protein_coding	l(2)37Cd
FBgn0035085	0.188474	0.314528	0.883343	protein_coding	CG3770
FBgn0039673	0.188466	0.408713	0.932317	protein_coding	CG7568
FBgn0001090	0.188416	0.544972	0.963909	protein_coding	bnb
FBgn0036486	0.188348	0.469412	0.946869	protein_coding	Msh6
FBgn0250755	0.188298	0.279446	0.85779	protein_coding	CG42233
FBgn0040993	0.188276	0.461606	0.943026	protein_coding	CG17325
FBgn0259201	0.188276	0.461606	0.943026	protein_coding	CG42305
FBgn0086608	0.187949	0.205374	0.787594	protein_coding	CG34112
FBgn0036118	0.187841	0.205615	0.787594	protein_coding	Blos2
FBgn0039645	0.187716	0.214166	0.796532	protein_coding	CG11898
FBgn0037972	0.187713	0.492598	0.953904	protein_coding	CG10005
FBgn0061469	0.187696	0.0889118	0.562099	protein_coding	Ube3a
FBgn0032449	0.187645	0.338536	0.893537	protein_coding	CG17036
FBgn0000568	0.187619	0.289226	0.863136	protein_coding	Eip75B
FBgn0024992	0.18698	0.111332	0.622295	protein_coding	Spg7
FBgn0036932	0.186792	0.164899	0.72461	protein_coding	CG14184
FBgn0004429	0.186716	0.105321	0.607048	protein_coding	LysP
FBgn0000392	0.186649	0.292031	0.86507	protein_coding	cup
FBgn0016080	0.186436	0.45885	0.941821	NA	NA
FBgn0264672	0.186387	0.315802	0.883343	protein_coding	Eogt
FBgn0035867	0.186353	0.223897	0.805281	protein_coding	CG13671
FBgn0039381	0.186282	0.153306	0.706081	protein_coding	SppL
FBgn0023130	0.186136	0.256254	0.834772	protein_coding	a6
FBgn0005655	0.18605	0.346282	0.896031	protein_coding	PCNA
FBgn0028563	0.186022	0.175802	0.74786	protein_coding	sut1
FBgn0013276	0.186004	0.843362	0.992671	protein_coding	Hsp70Ab
FBgn0025391	0.185869	0.47262	0.947018	protein_coding	Scgdelta
FBgn0036987	0.185341	0.293923	0.866331	protein_coding	CG5274
FBgn0001258	0.185056	0.272302	0.851908	protein_coding	Ldh
FBgn0032781	0.185029	0.176091	0.748096	protein_coding	RtcB
FBgn0036698	0.184942	0.43283	0.939545	protein_coding	CG7724
FBgn0284435	0.184886	0.401297	0.930439	protein_coding	tyn
FBgn0027783	0.18485	0.318101	0.884091	protein_coding	SMC2
FBgn0050466	0.184511	0.421539	0.939545	protein_coding	CG30466
FBgn0051184	0.184468	0.224491	0.805281	protein_coding	LSm3
FBgn0051251	0.184453	0.439056	0.939545	protein_coding	CG31251
FBgn0024194	0.184422	0.171977	0.737789	protein_coding	rasp
FBgn0026431	0.184347	0.209215	0.789402	protein_coding	Grip75
FBgn0261862	0.184346	0.485583	0.95122	protein_coding	whd
FBgn0000723	0.18427	0.101597	0.598133	protein_coding	FER
FBgn0031951	0.184232	0.289004	0.863136	protein_coding	r2d2
FBgn0026404	0.184193	0.109867	0.619092	protein_coding	Dronc
FBgn0023517	0.184133	0.180045	0.752067	protein_coding	Pgam5
FBgn0085408	0.183621	0.308429	0.877158	protein_coding	Shrm
FBgn0003435	0.18362	0.123722	0.645748	protein_coding	sm
FBgn0033683	0.183598	0.166681	0.726415	protein_coding	CG18343
FBgn0039020	0.183591	0.33092	0.889118	protein_coding	CG17141
FBgn0039897	0.183375	0.404828	0.932219	protein_coding	CG1674
FBgn0052773	0.183278	0.480035	0.949665	ncRNA	lncRNA:CR32773
FBgn0035743	0.183201	0.585707	0.974018	protein_coding	Acbp6
FBgn0034430	0.183095	0.318411	0.884487	protein_coding	mip40
FBgn0034579	0.182896	0.199554	0.78023	protein_coding	mRpL54
FBgn0038039	0.182837	0.0994619	0.592516	protein_coding	CG5196
FBgn0034650	0.182814	0.265442	0.845018	protein_coding	NC2alpha
FBgn0037166	0.182797	0.352773	0.903834	protein_coding	CG11426
FBgn0038549	0.182749	0.375985	0.9157	protein_coding	CG17802
FBgn0034543	0.182271	0.118805	0.637904	protein_coding	galla-1
FBgn0039543	0.182171	0.390777	0.927367	protein_coding	CROT
FBgn0034290	0.182119	0.278749	0.857648	protein_coding	CG5773
FBgn0050489	0.181049	0.408762	0.932317	protein_coding	Cyp12d1-p
FBgn0050479	0.180972	0.208226	0.788765	protein_coding	CG30479
FBgn0038369	0.18093	0.203706	0.785499	protein_coding	Arpc3A
FBgn0015550	0.180867	0.404512	0.932219	protein_coding	tap
FBgn0038237	0.180752	0.328109	0.889118	protein_coding	Pde6
FBgn0001217	0.180682	0.529753	0.961711	protein_coding	Hsc70-2
FBgn0050104	0.180664	0.391786	0.927367	protein_coding	NT5E-2
FBgn0035989	0.180532	0.211819	0.793552	protein_coding	Tat
FBgn0039407	0.180475	0.404653	0.932219	protein_coding	CG14544
FBgn0031602	0.180381	0.169192	0.733367	protein_coding	CG15431
FBgn0051087	0.180294	0.0802256	0.530096	protein_coding	CG31087
FBgn0037780	0.180225	0.0882181	0.559821	protein_coding	ohgt
FBgn0033927	0.180011	0.461454	0.943026	pseudogene	CR10102
FBgn0010473	0.179848	0.487406	0.952047	protein_coding	tutl
FBgn0038325	0.179793	0.252143	0.833026	protein_coding	Atg4b
FBgn0030876	0.179787	0.240376	0.820309	protein_coding	CG6762
FBgn0033720	0.179724	0.462578	0.943997	protein_coding	CG13160
FBgn0011802	0.179571	0.468668	0.946869	protein_coding	Gem3
FBgn0015721	0.179568	0.482684	0.95122	protein_coding	ktub
FBgn0032480	0.179469	0.1064	0.609248	protein_coding	Edem2
FBgn0004362	0.179136	0.340703	0.893731	protein_coding	HmgD
FBgn0029723	0.179117	0.537109	0.96285	protein_coding	Proc-R
FBgn0032479	0.179076	0.18326	0.754927	protein_coding	CG16974
FBgn0029603	0.179075	0.636076	0.982921	protein_coding	CG14053
FBgn0010040	0.178956	0.414362	0.934725	protein_coding	GstD4
FBgn0036665	0.178631	0.456004	0.941615	protein_coding	CG13024
FBgn0027052	0.178556	0.185585	0.758594	protein_coding	STUB1
FBgn0038608	0.178534	0.451169	0.941615	protein_coding	WRNexo
FBgn0011762	0.178427	0.445916	0.939545	protein_coding	DNApol-alpha50
FBgn0002023	0.178417	0.437933	0.939545	protein_coding	Lim3
FBgn0033339	0.178249	0.103702	0.602414	protein_coding	Sec31
FBgn0010238	0.178142	0.378052	0.917555	protein_coding	Lac
FBgn0053082	0.178138	0.17887	0.750655	protein_coding	Rpp21
FBgn0033294	0.177983	0.346334	0.896031	protein_coding	Mal-A4
FBgn0020506	0.177979	0.456585	0.941615	protein_coding	Amyrel
FBgn0265974	0.177964	0.0977679	0.590999	protein_coding	ttv
FBgn0052170	0.177832	0.424168	0.939545	protein_coding	CG32170
FBgn0032172	0.177769	0.138429	0.677258	protein_coding	CG5850
FBgn0036063	0.177646	0.329572	0.889118	protein_coding	CG6674
FBgn0051989	0.177607	0.328625	0.889118	protein_coding	Cap-D3
FBgn0039003	0.177472	0.286223	0.861979	protein_coding	wfs1
FBgn0038569	0.177391	0.11682	0.634611	protein_coding	CG7218
FBgn0053494	0.177388	0.47167	0.947018	protein_coding	CG33494
FBgn0034753	0.17733	0.0979032	0.590999	protein_coding	CG2852
FBgn0032005	0.177169	0.179189	0.750967	protein_coding	Snx6
FBgn0051777	0.177113	0.614656	0.97953	protein_coding	CG31777
FBgn0028406	0.176943	0.382691	0.922797	protein_coding	Drep4
FBgn0030600	0.176911	0.134689	0.669892	protein_coding	hiw
FBgn0029858	0.176863	0.294291	0.866331	protein_coding	mldr
FBgn0264691	0.17675	0.270877	0.849937	protein_coding	Lst8
FBgn0051249	0.176743	0.310462	0.880207	protein_coding	CG31249
FBgn0034059	0.176739	0.22306	0.805281	protein_coding	CG8320
FBgn0028468	0.176657	0.203258	0.785499	protein_coding	rtet
FBgn0004512	0.176581	0.393147	0.92774	protein_coding	Mdr49
FBgn0041579	0.17649	0.683454	0.986095	protein_coding	AttC
FBgn0030605	0.176432	0.269326	0.849491	protein_coding	ND-B18
FBgn0250732	0.176404	0.190152	0.767795	protein_coding	gfzf
FBgn0019929	0.176195	0.50377	0.956954	protein_coding	Ser7
FBgn0042083	0.175783	0.153226	0.706081	protein_coding	Mccc2
FBgn0036340	0.175764	0.0938619	0.579941	protein_coding	Srrm1
FBgn0032715	0.175741	0.227128	0.806798	protein_coding	CG17597
FBgn0032727	0.17565	0.256563	0.834772	protein_coding	CG10623
FBgn0010356	0.175624	0.194265	0.772718	protein_coding	Taf5
FBgn0085284	0.175595	0.444905	0.939545	protein_coding	Blos3
FBgn0028480	0.175377	0.142868	0.68711	protein_coding	CG17841
FBgn0030262	0.175363	0.459277	0.941943	protein_coding	Vago
FBgn0037963	0.175288	0.488629	0.952684	protein_coding	Cad87A
FBgn0030345	0.175258	0.283498	0.860395	protein_coding	CG1847
FBgn0036740	0.175041	0.0843227	0.544746	protein_coding	Vps60
FBgn0052100	0.174895	0.385761	0.925325	protein_coding	CG32100
FBgn0020269	0.174885	0.489822	0.953489	protein_coding	mspo
FBgn0035851	0.174747	0.178416	0.750655	protein_coding	MED24
FBgn0032013	0.174645	0.564546	0.970244	protein_coding	Scgalpha
FBgn0263131	0.174571	0.50575	0.956954	protein_coding	CG43373
FBgn0029688	0.174488	0.0669949	0.488316	protein_coding	lva
FBgn0035440	0.174307	0.198775	0.78023	protein_coding	CG14969
FBgn0036484	0.174301	0.130531	0.66239	protein_coding	Pex3
FBgn0259728	0.174149	0.394162	0.927889	protein_coding	CG42382
FBgn0035957	0.174083	0.507459	0.956954	protein_coding	CG5144
FBgn0023023	0.173593	0.287368	0.862053	protein_coding	CRMP
FBgn0260861	0.173559	0.271271	0.850142	protein_coding	Trs23
FBgn0050108	0.173469	0.290975	0.864575	protein_coding	CG30108
FBgn0039969	0.173452	0.150463	0.702536	protein_coding	Fis1
FBgn0036155	0.173042	0.436795	0.939545	protein_coding	CG6163
FBgn0035854	0.172896	0.38415	0.924422	protein_coding	CG8005
FBgn0036487	0.172884	0.157071	0.712975	protein_coding	Prp31
FBgn0036036	0.172798	0.509987	0.957816	protein_coding	CG14174
FBgn0029762	0.17249	0.521965	0.96148	protein_coding	NAAT1
FBgn0032863	0.172475	0.344675	0.894819	protein_coding	Cdc23
FBgn0030013	0.172331	0.300164	0.871046	protein_coding	GIIIspla2
FBgn0030051	0.172141	0.561807	0.96987	protein_coding	spirit
FBgn0013750	0.17205	0.0703691	0.500566	protein_coding	Arf51F
FBgn0031384	0.172042	0.358776	0.906049	protein_coding	CG4238
FBgn0027611	0.171996	0.465755	0.946441	protein_coding	LManII
FBgn0011740	0.171854	0.364573	0.90984	protein_coding	alpha-Man-IIa
FBgn0038461	0.171854	0.266917	0.845532	protein_coding	EMC2B
FBgn0037071	0.171569	0.278172	0.857648	protein_coding	CG7632
FBgn0053080	0.171495	0.257621	0.834772	protein_coding	CG33080
FBgn0037749	0.171381	0.219329	0.802981	protein_coding	CG9471
FBgn0033450	0.171184	0.508288	0.956954	protein_coding	Lsm11
FBgn0031579	0.171111	0.0575727	0.450663	protein_coding	CG15422
FBgn0031351	0.171085	0.490722	0.953489	protein_coding	CG14352
FBgn0038675	0.171057	0.245787	0.826324	protein_coding	CG6013
FBgn0002354	0.170939	0.345811	0.895885	protein_coding	l(3)87Df
FBgn0032681	0.170594	0.461733	0.943085	protein_coding	CG10283
FBgn0030099	0.170546	0.302933	0.8737	protein_coding	CG12056
FBgn0032394	0.170468	0.213464	0.796532	protein_coding	Hacd1
FBgn0011648	0.170448	0.117157	0.635559	protein_coding	Mad
FBgn0030263	0.17034	0.102975	0.600682	protein_coding	CG2076
FBgn0015025	0.170269	0.524766	0.96148	protein_coding	CkIIalpha-i1
FBgn0039209	0.16998	0.287656	0.862341	protein_coding	REPTOR
FBgn0040959	0.169946	0.519461	0.96086	protein_coding	Peritrophin-15a
FBgn0034538	0.169933	0.401576	0.930439	protein_coding	CG16799
FBgn0039938	0.169728	0.53279	0.962072	protein_coding	Sox102F
FBgn0039580	0.169708	0.280394	0.858753	protein_coding	Gfat2
FBgn0036837	0.169641	0.470852	0.947018	protein_coding	CG18135
FBgn0038981	0.169628	0.205721	0.787594	protein_coding	CG5346
FBgn0001189	0.169524	0.10306	0.600682	protein_coding	hfw
FBgn0036335	0.169438	0.236693	0.816201	protein_coding	mRpL20
FBgn0086712	0.169406	0.114722	0.630273	protein_coding	Egm
FBgn0038482	0.169389	0.303222	0.8737	protein_coding	CG4053
FBgn0037312	0.169311	0.206704	0.787594	protein_coding	CG11999
FBgn0278608	0.169143	0.209031	0.789402	protein_coding	Dsp1
FBgn0038484	0.1691	0.592075	0.974553	protein_coding	CG5246
FBgn0033321	0.168946	0.343782	0.894819	protein_coding	CG8738
FBgn0011737	0.168898	0.307637	0.877158	protein_coding	Wee1
FBgn0001224	0.168761	0.931926	0.996605	protein_coding	Hsp23
FBgn0030959	0.168244	0.184303	0.755458	protein_coding	CG6961
FBgn0035438	0.168227	0.152884	0.706081	protein_coding	PHGPx
FBgn0029736	0.168066	0.253788	0.833512	protein_coding	CG4041
FBgn0003716	0.167747	0.129334	0.662168	protein_coding	tkv
FBgn0028931	0.167698	0.441122	0.939545	protein_coding	CG16863
FBgn0050495	0.167669	0.341468	0.894273	protein_coding	CG30495
FBgn0031327	0.167637	0.469271	0.946869	protein_coding	CG5397
FBgn0086604	0.16763	0.464161	0.945736	protein_coding	side-VIII
FBgn0039637	0.167095	0.236839	0.816411	protein_coding	Ctl2
FBgn0034935	0.166943	0.161368	0.719826	protein_coding	Orcokinin
FBgn0031534	0.166916	0.144003	0.690153	protein_coding	Snx1
FBgn0030030	0.166908	0.331053	0.889118	protein_coding	CG1636
FBgn0038772	0.166892	0.319143	0.884538	protein_coding	mdlc
FBgn0040634	0.166882	0.434952	0.939545	protein_coding	CG4186
FBgn0038479	0.166856	0.54287	0.963909	protein_coding	CG17477
FBgn0030985	0.166587	0.544095	0.963909	protein_coding	Obp18a
FBgn0010590	0.166585	0.0801309	0.530096	protein_coding	Prosbeta1
FBgn0051898	0.166522	0.540077	0.963798	protein_coding	CG31898
FBgn0010387	0.166491	0.192324	0.769962	protein_coding	Acbp2
FBgn0002569	0.166441	0.314706	0.883343	protein_coding	Mal-A2
FBgn0030610	0.166404	0.22289	0.805281	protein_coding	CG9065
FBgn0051161	0.166159	0.490907	0.953489	protein_coding	CG31161
FBgn0052133	0.166123	0.28919	0.863136	protein_coding	Ptip
FBgn0031434	0.165935	0.547832	0.965342	protein_coding	insv
FBgn0017551	0.16551	0.416355	0.936555	protein_coding	Rca1
FBgn0083952	0.165335	0.516508	0.959519	protein_coding	CG34116
FBgn0034392	0.164977	0.200314	0.780948	protein_coding	MFS15
FBgn0004395	0.164917	0.375069	0.914901	protein_coding	unk
FBgn0259238	0.164911	0.191468	0.769874	protein_coding	CG42336
FBgn0035806	0.164904	0.493827	0.954026	protein_coding	PGRP-SD
FBgn0020312	0.164772	0.332064	0.889118	protein_coding	Tmtc3
FBgn0035691	0.164738	0.456795	0.941615	protein_coding	CG7386
FBgn0038830	0.164713	0.222614	0.805117	protein_coding	CG17272
FBgn0051643	0.164574	0.257939	0.834958	protein_coding	CG31643
FBgn0037241	0.164507	0.176568	0.748732	protein_coding	CG14646
FBgn0052683	0.164377	0.612509	0.978635	protein_coding	CG32683
FBgn0044419	0.164355	0.25287	0.833405	protein_coding	Pmi
FBgn0038274	0.164244	0.356854	0.90594	protein_coding	Nup93-2
FBgn0035409	0.164141	0.403869	0.932219	protein_coding	CG14963
FBgn0033995	0.164077	0.214882	0.797228	protein_coding	GPHR
FBgn0033301	0.164028	0.323234	0.887036	protein_coding	CG12780
FBgn0038735	0.16396	0.256084	0.834772	protein_coding	MICU3
FBgn0284227	0.163931	0.398374	0.930054	protein_coding	CG46311
FBgn0039431	0.163926	0.487428	0.952047	protein_coding	plum
FBgn0027085	0.163758	0.128744	0.662051	protein_coding	LeuRS-m
FBgn0035023	0.163735	0.436906	0.939545	protein_coding	ITP
FBgn0261396	0.163683	0.145362	0.692465	protein_coding	Rpn3
FBgn0261020	0.163647	0.0858408	0.550239	protein_coding	wol
FBgn0030306	0.163574	0.173879	0.742635	protein_coding	Spase25
FBgn0032205	0.163448	0.289847	0.863681	protein_coding	CG4957
FBgn0028534	0.16329	0.336551	0.892643	protein_coding	CG7916
FBgn0001084	0.163259	0.534783	0.962072	protein_coding	fy
FBgn0032698	0.163215	0.508438	0.956954	protein_coding	CG10336
FBgn0262484	0.163089	0.0428275	0.378093	protein_coding	CG43074
FBgn0030246	0.163035	0.120629	0.639607	protein_coding	CG1582
FBgn0004381	0.162933	0.324716	0.888647	protein_coding	Klp68D
FBgn0259243	0.162914	0.126167	0.652483	protein_coding	Pka-R1
FBgn0263133	0.162885	0.280731	0.858753	protein_coding	mEFG1
FBgn0039415	0.162857	0.73118	0.986904	protein_coding	CG6142
FBgn0034876	0.162656	0.138139	0.677258	protein_coding	wmd
FBgn0023083	0.162467	0.269855	0.849491	protein_coding	fray
FBgn0016715	0.162422	0.24041	0.820309	protein_coding	Reg-2
FBgn0013717	0.162149	0.242085	0.822113	protein_coding	not
FBgn0031145	0.161889	0.192038	0.769914	protein_coding	Ntf-2
FBgn0053635	0.161673	0.344447	0.894819	protein_coding	CG33635
FBgn0040383	0.161673	0.368268	0.912199	protein_coding	CG5254
FBgn0086443	0.161672	0.130226	0.66239	protein_coding	AsnRS
FBgn0036896	0.161521	0.277972	0.857648	protein_coding	wnd
FBgn0010774	0.161411	0.312069	0.881384	protein_coding	Ref1
FBgn0259721	0.161402	0.292232	0.86507	protein_coding	CG42375
FBgn0260464	0.161402	0.292232	0.86507	protein_coding	CG9288
FBgn0025624	0.161339	0.206549	0.787594	protein_coding	CG4025
FBgn0015379	0.161328	0.180698	0.752696	protein_coding	dod
FBgn0035771	0.161165	0.119341	0.639044	protein_coding	Sec63
FBgn0039200	0.161096	0.207122	0.787594	protein_coding	CG13616
FBgn0037688	0.161081	0.252351	0.833405	protein_coding	CG9356
FBgn0036731	0.160982	0.581501	0.973305	protein_coding	CG6333
FBgn0004868	0.160954	0.113055	0.625019	protein_coding	Gdi
FBgn0039877	0.160946	0.165487	0.72461	protein_coding	Mccc1
FBgn0058002	0.16082	0.143254	0.687932	protein_coding	ND-AGGG
FBgn0038260	0.160799	0.486775	0.952047	protein_coding	CG14855
FBgn0035488	0.160666	0.250632	0.83003	protein_coding	CG11593
FBgn0039301	0.160449	0.477201	0.949464	protein_coding	Nup37
FBgn0000057	0.160419	0.138694	0.677887	protein_coding	adp
FBgn0259977	0.160261	0.529583	0.961711	protein_coding	Tdc1
FBgn0027341	0.160201	0.470875	0.947018	NA	NA
FBgn0026255	0.160095	0.602281	0.977109	protein_coding	clumsy
FBgn0283659	0.160057	0.375538	0.915173	protein_coding	THG
FBgn0284222	0.160044	0.559137	0.969406	protein_coding	CG46306
FBgn0037659	0.160043	0.256588	0.834772	protein_coding	Kdm2
FBgn0035529	0.160027	0.18385	0.755458	protein_coding	Fdx2
FBgn0037848	0.159883	0.270431	0.849491	protein_coding	Tsp86D
FBgn0264296	0.15963	0.275482	0.855297	protein_coding	CG43774
FBgn0261984	0.159625	0.169434	0.734088	protein_coding	Ire1
FBgn0051324	0.159625	0.756696	0.986904	protein_coding	CG31324
FBgn0266434	0.15955	0.688527	0.986206	protein_coding	CG45064
FBgn0266435	0.15955	0.688527	0.986206	protein_coding	CG45065
FBgn0000427	0.159427	0.516655	0.959519	protein_coding	2001-12-01
FBgn0033085	0.159411	0.370326	0.912199	protein_coding	CG15908
FBgn0037469	0.159315	0.303245	0.8737	protein_coding	Dpck
FBgn0038740	0.159303	0.320043	0.884538	protein_coding	CG4562
FBgn0030724	0.159296	0.214146	0.796532	protein_coding	Nipsnap
FBgn0032723	0.159288	0.203041	0.785213	protein_coding	ssp3
FBgn0262108	0.159152	0.458524	0.941821	ncRNA	lncRNA:CR42861
FBgn0045866	0.159023	0.0766601	0.519387	protein_coding	bai
FBgn0031068	0.158918	0.308565	0.877158	protein_coding	Alr
FBgn0021765	0.15887	0.252698	0.833405	protein_coding	scu
FBgn0032297	0.158719	0.409249	0.932317	protein_coding	CG17124
FBgn0050371	0.158591	0.265677	0.845052	protein_coding	CG30371
FBgn0053155	0.158576	0.250382	0.829774	protein_coding	CG33155
FBgn0031399	0.158575	0.294278	0.866331	protein_coding	mio
FBgn0034032	0.158336	0.238933	0.819625	protein_coding	CG8195
FBgn0035631	0.158335	0.140582	0.68142	protein_coding	Txl
FBgn0000308	0.158227	0.285715	0.861723	protein_coding	chic
FBgn0020655	0.158211	0.0981969	0.591067	protein_coding	ArfGAP1
FBgn0031059	0.158128	0.296926	0.867566	protein_coding	CG14229
FBgn0032088	0.15811	0.310178	0.879661	protein_coding	CG13102
FBgn0037622	0.158103	0.171207	0.736495	protein_coding	CG8202
FBgn0019925	0.158058	0.16711	0.727236	protein_coding	Surf4
FBgn0031814	0.158033	0.291209	0.864575	protein_coding	retm
FBgn0010300	0.157953	0.410231	0.93282	protein_coding	brat
FBgn0034902	0.157622	0.140357	0.68142	protein_coding	CG5532
FBgn0013576	0.15754	0.151166	0.703336	protein_coding	mtd
FBgn0033569	0.157346	0.41009	0.93272	protein_coding	CG12942
FBgn0051715	0.157332	0.186829	0.761091	protein_coding	CG31715
FBgn0031681	0.157231	0.196162	0.775528	protein_coding	Pgant5
FBgn0086906	0.15719	0.479759	0.94964	protein_coding	sls
FBgn0019949	0.157176	0.302865	0.8737	protein_coding	Cdk9
FBgn0034629	0.157146	0.416672	0.937049	protein_coding	Acox57D-d
FBgn0026713	0.156695	0.172789	0.740282	protein_coding	l(1)G0007
FBgn0030927	0.156669	0.61297	0.978635	protein_coding	CG15046
FBgn0015399	0.156651	0.783666	0.988048	protein_coding	kek1
FBgn0051821	0.156581	0.435538	0.939545	protein_coding	CG31821
FBgn0264908	0.156563	0.661434	0.986095	protein_coding	pHCl-1
FBgn0032234	0.156435	0.226953	0.806798	protein_coding	gny
FBgn0030434	0.156417	0.272753	0.852762	protein_coding	Brms1
FBgn0035983	0.156402	0.148328	0.69972	protein_coding	CG4080
FBgn0284442	0.156296	0.419025	0.938195	protein_coding	Mcm3
FBgn0053969	0.156265	0.230426	0.810193	protein_coding	CG33969
FBgn0024510	0.156178	0.413092	0.934725	protein_coding	dlt
FBgn0261065	0.156094	0.335403	0.891996	protein_coding	Cpsf73
FBgn0263005	0.156071	0.33754	0.89323	protein_coding	CG43313
FBgn0036133	0.155813	0.292015	0.86507	protein_coding	CG7638
FBgn0033431	0.155709	0.204652	0.786661	protein_coding	CG1827
FBgn0037387	0.155615	0.363126	0.909414	protein_coding	CG1213
FBgn0052072	0.155449	0.487786	0.952047	protein_coding	Elo68alpha
FBgn0034054	0.155424	0.354074	0.904363	protein_coding	CG8366
FBgn0030114	0.155391	0.332946	0.889893	protein_coding	CG17754
FBgn0033984	0.155214	0.305551	0.875601	protein_coding	Lap1
FBgn0051109	0.155087	0.420994	0.939545	protein_coding	CG31109
FBgn0031144	0.155079	0.258332	0.835667	protein_coding	CG1529
FBgn0030915	0.155047	0.289402	0.863268	protein_coding	CG6179
FBgn0037472	0.154515	0.249291	0.82784	protein_coding	CG10098
FBgn0037195	0.154435	0.579951	0.973305	protein_coding	CG11226
FBgn0027342	0.154346	0.302986	0.8737	protein_coding	fz4
FBgn0020278	0.15432	0.279758	0.858473	protein_coding	loco
FBgn0024191	0.154166	0.338665	0.893537	protein_coding	sip1
FBgn0040465	0.15407	0.25279	0.833405	protein_coding	Dlip3
FBgn0013973	0.154037	0.541218	0.963798	protein_coding	Gycbeta100B
FBgn0039006	0.15391	0.290863	0.864575	protein_coding	Cyp6d4
FBgn0053111	0.153849	0.40896	0.932317	protein_coding	CG33111
FBgn0010424	0.153632	0.553965	0.967469	protein_coding	TpnC73F
FBgn0035848	0.153592	0.165495	0.72461	protein_coding	Uxs
FBgn0262167	0.153507	0.422573	0.939545	protein_coding	ana1
FBgn0032779	0.15342	0.353728	0.904229	protein_coding	Alp12
FBgn0035150	0.15318	0.366949	0.912199	protein_coding	Rev1
FBgn0053301	0.152923	0.521979	0.96148	protein_coding	CG33301
FBgn0039737	0.152921	0.343805	0.894819	protein_coding	CG7920
FBgn0027574	0.152797	0.220174	0.80321	protein_coding	CG5815
FBgn0034083	0.152707	0.149704	0.702173	protein_coding	lbk
FBgn0262820	0.152579	0.590092	0.974553	protein_coding	CG43191
FBgn0003231	0.15256	0.297508	0.867566	protein_coding	ref(2)P
FBgn0035252	0.152532	0.283893	0.860395	protein_coding	CG7970
FBgn0034491	0.152503	0.285747	0.861723	protein_coding	Hsl
FBgn0031952	0.152283	0.286659	0.861995	protein_coding	cdc14
FBgn0011202	0.152283	0.40408	0.932219	protein_coding	dia
FBgn0031379	0.152105	0.228313	0.807137	protein_coding	CG7289
FBgn0051202	0.151992	0.505177	0.956954	protein_coding	alpha-Man-Ic
FBgn0052056	0.151829	0.0907454	0.570213	protein_coding	scramb1
FBgn0058469	0.151806	0.672961	0.986095	ncRNA	lncRNA:CR40469
FBgn0035471	0.151791	0.187186	0.761299	protein_coding	Sc2
FBgn0034269	0.151685	0.326197	0.889118	protein_coding	Hyccin
FBgn0028546	0.151548	0.22474	0.805281	protein_coding	ics
FBgn0028691	0.151523	0.158592	0.715486	protein_coding	Rpn9
FBgn0035622	0.15146	0.0973323	0.589735	protein_coding	TM9SF3
FBgn0266388	0.15145	0.527521	0.961711	ncRNA	asRNA:CR45028
FBgn0261403	0.151052	0.106688	0.610174	protein_coding	sxc
FBgn0027095	0.151032	0.136637	0.676246	protein_coding	Manf
FBgn0035461	0.150932	0.503765	0.956954	protein_coding	ntc
FBgn0028572	0.150818	0.139324	0.678552	protein_coding	qtc
FBgn0014037	0.150752	0.106485	0.609375	protein_coding	Su(Tpl)
FBgn0004861	0.150714	0.192932	0.770649	protein_coding	ph-p
FBgn0016920	0.150557	0.531624	0.961986	protein_coding	nompC
FBgn0026634	0.150319	0.229368	0.809524	protein_coding	Cog2
FBgn0050296	0.150283	0.461292	0.943026	protein_coding	RIC-3
FBgn0266709	0.150088	0.844264	0.992671	protein_coding	Zmynd10
FBgn0034729	0.150082	0.392111	0.927612	protein_coding	CG10344
FBgn0266203	0.149989	0.602214	0.977109	ncRNA	lncRNA:CR44898
FBgn0030745	0.149774	0.417388	0.9375	protein_coding	CG4239
FBgn0036141	0.149756	0.27552	0.855297	protein_coding	wls
FBgn0032671	0.149698	0.338214	0.893537	protein_coding	JMJD4
FBgn0001994	0.149665	0.212426	0.794653	protein_coding	crp
FBgn0030893	0.149549	0.321693	0.885922	protein_coding	RhoGAP16F
FBgn0035431	0.149507	0.0794647	0.529207	protein_coding	CG14968
FBgn0040370	0.149445	0.522436	0.96148	protein_coding	CG13375
FBgn0038588	0.14942	0.492939	0.953904	protein_coding	CG7156
FBgn0010591	0.149406	0.218942	0.802175	protein_coding	Sply
FBgn0039711	0.149346	0.426534	0.939545	protein_coding	CG7824
[truncated: 7,615 more rows]

## Sheet: Senolytic vs. Control
gene_id	log2FoldChange	pvalue	padj	gene_biotype	external_gene_name
FBgn0085256	3.21509	7.4829e-14	2.66447e-11	protein_coding	CG34227
FBgn0262536	3.00011	2.04706e-16	1.31203e-13	protein_coding	CG43090
FBgn0033312	2.23627	1.46327e-13	5.02425e-11	protein_coding	CG8642
FBgn0261085	2.22407	7.04188e-14	2.60387e-11	protein_coding	Syt12
FBgn0265267	2.19092	7.60977e-09	1.19935e-06	protein_coding	CG18258
FBgn0031791	2.1243	2.24078e-21	4.30858e-18	protein_coding	AANATL2
FBgn0037786	1.97868	3.95141e-15	1.99941e-12	protein_coding	Alp13
FBgn0037548	1.93792	1.17929e-22	2.83443e-19	protein_coding	CG7900
FBgn0026575	1.91	2.09346e-44	1.00633e-40	protein_coding	hang
FBgn0051741	1.85364	1.41391e-12	3.8838e-10	protein_coding	CG31741
FBgn0032067	1.84369	2.61596e-11	5.98806e-09	protein_coding	LManIV
FBgn0052984	1.82129	2.64197e-07	2.52827e-05	protein_coding	CG32984
FBgn0267084	1.79441	2.18074e-12	5.66638e-10	ncRNA	asRNA:CR45528
FBgn0034470	1.79215	6.77826e-08	8.5745e-06	protein_coding	Obp56d
FBgn0034860	1.78923	1.34678e-14	5.62953e-12	protein_coding	CG9812
FBgn0085452	1.76436	6.59173e-15	3.01776e-12	protein_coding	CG34423
FBgn0262357	1.71599	6.782e-21	8.15027e-18	protein_coding	CG43055
FBgn0039886	1.70855	9.423e-16	5.03293e-13	protein_coding	CG2003
FBgn0039323	1.7058	8.46682e-17	5.81429e-14	protein_coding	CG10559
FBgn0034497	1.66053	4.48078e-11	9.79051e-09	protein_coding	Mpcp1
FBgn0038257	1.65763	6.50621e-11	1.3598e-08	protein_coding	smp-30
FBgn0032839	1.64641	5.65471e-15	2.71822e-12	protein_coding	AANATL3
FBgn0039475	1.59502	6.62796e-13	1.99129e-10	protein_coding	CG6277
FBgn0032663	1.53071	7.86766e-09	1.22e-06	protein_coding	CG15153
FBgn0035666	1.49984	2.77191e-10	5.55191e-08	protein_coding	Jon65Aii
FBgn0029799	1.49907	3.8543e-09	6.61702e-07	protein_coding	CG15772
FBgn0033593	1.4713	4.58316e-05	0.00191576	protein_coding	Listericin
FBgn0085345	1.45125	6.82503e-10	1.31232e-07	protein_coding	CG34316
FBgn0039315	1.42903	1.87548e-12	5.00859e-10	protein_coding	CG13658
FBgn0036956	1.36188	4.19429e-06	0.000273624	protein_coding	CG13813
FBgn0019928	1.34509	6.42294e-07	5.66515e-05	protein_coding	Ser8
FBgn0032362	1.34198	9.66519e-07	8.01044e-05	protein_coding	spz4
FBgn0260943	1.3347	4.74185e-06	0.000297962	protein_coding	Rbp6
FBgn0042206	1.32301	7.93575e-13	2.31195e-10	protein_coding	GstD10
FBgn0033592	1.32202	0.000144994	0.00487402	protein_coding	CG13215
FBgn0038917	1.3164	1.32163e-07	1.44388e-05	protein_coding	CG6678
FBgn0033372	1.30113	1.13935e-07	1.31973e-05	protein_coding	CG13742
FBgn0003979	1.30056	3.99962e-05	0.00173993	protein_coding	Vm26Aa
FBgn0035678	1.29661	1.27618e-11	2.99249e-09	protein_coding	CG10469
FBgn0003023	1.29543	9.24655e-06	0.000493869	protein_coding	otu
FBgn0051075	1.28938	7.10601e-07	6.1547e-05	protein_coding	CG31075
FBgn0264748	1.25169	1.02832e-06	8.3782e-05	protein_coding	CG44006
FBgn0261616	1.24404	2.49845e-12	6.32109e-10	protein_coding	CG42705
FBgn0033458	1.23548	3.92308e-06	0.000258332	protein_coding	Lime
FBgn0037448	1.23245	6.92091e-07	6.04887e-05	protein_coding	CG15186
FBgn0030218	1.22703	1.77176e-09	3.15438e-07	protein_coding	CG1628
FBgn0052302	1.22238	5.65563e-06	0.000350795	protein_coding	CG32302
FBgn0033289	1.21506	3.20999e-06	0.000220435	protein_coding	CG2121
FBgn0038018	1.21173	5.6547e-07	5.12871e-05	protein_coding	Tim17a1
FBgn0052834	1.207	4.12816e-05	0.00175611	protein_coding	CG32834
FBgn0264711	1.19768	5.58917e-05	0.00223893	protein_coding	CG43980
FBgn0032066	1.19424	8.72966e-06	0.000476858	protein_coding	LManIII
FBgn0025709	1.19164	3.97712e-09	6.70808e-07	protein_coding	CNT2
FBgn0032086	1.18693	2.41597e-06	0.000173337	protein_coding	CG17906
FBgn0032668	1.18649	7.58797e-07	6.51346e-05	protein_coding	CG17681
FBgn0033921	1.18455	2.23222e-05	0.00104878	protein_coding	tej
FBgn0004622	1.17298	3.30158e-08	4.6002e-06	protein_coding	TkR99D
FBgn0038180	1.16652	1.66943e-05	0.000818874	protein_coding	Cht5
FBgn0004649	1.13481	0.00223995	0.0390124	protein_coding	yl
FBgn0031837	1.11895	4.61566e-05	0.00192067	protein_coding	DIP-iota
FBgn0053301	1.11688	1.51048e-05	0.000748543	protein_coding	CG33301
FBgn0022774	1.10375	1.10321e-06	8.91283e-05	protein_coding	Oat
FBgn0085244	1.09866	4.90004e-05	0.00200464	protein_coding	CG34215
FBgn0037238	1.09831	4.89815e-05	0.00200464	protein_coding	CG1090
FBgn0029800	1.09089	2.17629e-07	2.15699e-05	protein_coding	lin-52
FBgn0032068	1.08456	6.84363e-06	0.000408002	protein_coding	LManV
FBgn0086254	1.07394	6.53104e-13	1.99129e-10	protein_coding	Akr1B
FBgn0032069	1.07126	1.72461e-05	0.000840191	protein_coding	LManVI
FBgn0262484	1.06607	1.63653e-06	0.000122919	protein_coding	CG43074
FBgn0001112	1.06448	0.00595881	0.0784767	protein_coding	Gld
FBgn0052072	1.05341	4.6652e-05	0.00192495	protein_coding	Elo68alpha
FBgn0036716	1.04921	0.000216923	0.00662061	protein_coding	CG13728
FBgn0267073	1.0456	7.81965e-05	0.00293665	ncRNA	lncRNA:CR45517
FBgn0039681	1.03447	3.04933e-05	0.00138074	protein_coding	CG7582
FBgn0023541	1.02644	8.5182e-06	0.000467966	protein_coding	Cyp4d14
FBgn0265498	1.0238	8.22746e-05	0.00304226	ncRNA	asRNA:CR44367
FBgn0002565	1.0042	0.000199842	0.00625823	protein_coding	Lsp2
FBgn0032549	0.990944	0.000245574	0.00724218	protein_coding	CG4650
FBgn0038460	0.983988	1.07884e-05	0.000554651	protein_coding	CG18622
FBgn0265901	0.97998	4.10254e-07	3.79248e-05	ncRNA	asRNA:CR44690
FBgn0033294	0.974867	0.000110924	0.00392068	protein_coding	Mal-A4
FBgn0038645	0.973436	0.00138858	0.0269694	protein_coding	CG7714
FBgn0011576	0.971702	1.70348e-07	1.7997e-05	protein_coding	Cyp4d2
FBgn0036361	0.968696	0.159093	0.523987	protein_coding	CG10154
FBgn0264341	0.967887	0.000504803	0.0129074	protein_coding	CG43797
FBgn0040333	0.962295	0.000653973	0.01564	protein_coding	brv3
FBgn0037936	0.960769	1.04245e-05	0.000545104	protein_coding	CG6908
FBgn0027572	0.960401	7.81412e-06	0.000447173	protein_coding	CG5009
FBgn0026403	0.936074	7.59261e-06	0.000437098	protein_coding	Ndg
FBgn0030882	0.933275	1.47621e-09	2.67778e-07	protein_coding	Gss1
FBgn0052495	0.933275	1.47621e-09	2.67778e-07	protein_coding	Gss2
FBgn0032187	0.932306	4.67023e-13	1.49665e-10	protein_coding	CG4839
FBgn0063494	0.932071	4.60571e-06	0.000291311	protein_coding	GstE6
FBgn0036749	0.926882	0.00130447	0.0257519	protein_coding	CG7460
FBgn0038020	0.92186	0.000163668	0.00535204	protein_coding	GstD9
FBgn0030332	0.92083	0.000138669	0.00471083	protein_coding	CG9360
FBgn0030795	0.918467	0.00110175	0.0230228	protein_coding	ppk28
FBgn0030048	0.907216	5.61177e-08	7.49327e-06	protein_coding	CG12112
FBgn0033108	0.906248	0.000386906	0.0103613	protein_coding	CG15236
FBgn0032780	0.903818	5.74518e-09	9.36172e-07	protein_coding	CG13085
FBgn0034247	0.902186	1.79276e-05	0.000861782	protein_coding	CG6484
FBgn0062978	0.894371	1.79514e-07	1.85575e-05	protein_coding	CG31808
FBgn0053126	0.89033	0.000155943	0.00516978	protein_coding	NLaz
FBgn0262003	0.889383	0.00228355	0.0394298	protein_coding	CG42821
FBgn0266001	0.888233	0.00145398	0.0277353	ncRNA	lncRNA:CR44775
FBgn0039319	0.885167	4.09352e-05	0.00175611	protein_coding	CG13659
FBgn0037975	0.879946	1.77251e-05	0.000856328	protein_coding	CG3397
FBgn0001612	0.87901	6.66153e-05	0.00257205	protein_coding	Grip91
FBgn0051710	0.877975	0.000119673	0.0041686	protein_coding	CG31710
FBgn0033395	0.877607	2.94487e-12	7.25948e-10	protein_coding	Cyp4p2
FBgn0031432	0.872488	0.0011215	0.0232374	protein_coding	Cyp309a1
FBgn0033720	0.870974	0.00031682	0.00877784	protein_coding	CG13160
FBgn0030593	0.868932	0.000371126	0.0100225	protein_coding	CG9512
FBgn0051091	0.868544	0.000899586	0.0200664	protein_coding	CG31091
FBgn0002531	0.867471	0.000889879	0.0199424	protein_coding	Lcp1
FBgn0036232	0.866209	0.00059237	0.0144178	protein_coding	CG14125
FBgn0005659	0.862595	0.00345842	0.0533285	protein_coding	Ets98B
FBgn0031824	0.860919	0.000319754	0.00880834	protein_coding	CG9547
FBgn0036824	0.8601	3.31195e-06	0.000225823	protein_coding	CG3902
FBgn0036833	0.858969	0.00020334	0.00634713	protein_coding	CG3819
FBgn0267035	0.852395	0.000180817	0.00579459	ncRNA	asRNA:CR45479
FBgn0001089	0.852191	1.05201e-05	0.000545104	protein_coding	Gal
FBgn0025680	0.851649	1.04344e-12	2.95047e-10	protein_coding	cry
FBgn0031689	0.849242	0.000154905	0.00515315	protein_coding	Cyp28d1
FBgn0087012	0.847286	0.00283107	0.0458215	protein_coding	5-HT2A
FBgn0031602	0.846293	6.5644e-08	8.41468e-06	protein_coding	CG15431
FBgn0085353	0.844822	0.000324042	0.00890098	protein_coding	CG34324
FBgn0029648	0.844613	2.45569e-06	0.000174881	protein_coding	CG3603
FBgn0002571	0.843456	0.00135878	0.0265514	protein_coding	Mal-A3
FBgn0000927	0.841523	0.00294417	0.0473332	protein_coding	fs(1)Ya
FBgn0054054	0.84045	0.00144112	0.0275766	protein_coding	CG34054
FBgn0032161	0.829352	0.000164773	0.00536992	protein_coding	CG4594
FBgn0010620	0.828921	2.48946e-06	0.000175983	protein_coding	CG10939
FBgn0015010	0.818645	6.47466e-05	0.00253266	protein_coding	Ag5r
FBgn0052407	0.818101	7.197e-05	0.00274571	protein_coding	CG32407
FBgn0038260	0.816835	0.00117123	0.0239069	protein_coding	CG14855
FBgn0024319	0.813389	0.00257381	0.0428108	protein_coding	Nach
FBgn0029898	0.81239	0.00142447	0.0273351	protein_coding	CG14439
FBgn0039474	0.810655	0.000212213	0.00653914	protein_coding	CG6283
FBgn0030597	0.809633	0.00209861	0.0369525	protein_coding	Eo
FBgn0262717	0.808845	0.00226158	0.0393179	protein_coding	Skeletor
FBgn0034394	0.808074	0.000670107	0.0159861	protein_coding	CG15096
FBgn0034871	0.802363	0.0012006	0.0243515	protein_coding	CG3906
FBgn0032785	0.796827	0.00125481	0.0251394	protein_coding	CG10026
FBgn0010043	0.794176	0.00123057	0.0248543	protein_coding	GstD7
FBgn0036831	0.792711	0.00168818	0.031272	protein_coding	CG6839
FBgn0034390	0.790835	1.48011e-05	0.000737296	protein_coding	CG15093
FBgn0054026	0.781352	4.10348e-05	0.00175611	protein_coding	CG34026
FBgn0263748	0.778029	0.00353329	0.0540601	protein_coding	CG43673
FBgn0015808	0.777093	1.19721e-05	0.000602615	protein_coding	ScpX
FBgn0265525	0.776825	0.00604293	0.0794293	ncRNA	asRNA:CR44375
FBgn0085736	0.775739	3.8523e-05	0.00168345	protein_coding	CG40472
FBgn0003996	0.774675	0.0176245	0.159072	protein_coding	w
FBgn0053012	0.774043	0.000804155	0.0184075	protein_coding	CG33012
FBgn0034045	0.773325	0.000350131	0.00950891	protein_coding	CG8249
FBgn0265187	0.773173	0.000801767	0.0183966	protein_coding	Fatp2
FBgn0063667	0.773171	0.000985517	0.0214361	protein_coding	CG32335
FBgn0263504	0.77192	4.11069e-05	0.00175611	ncRNA	lncRNA:CR43493
FBgn0032116	0.771615	0.00018824	0.00601241	protein_coding	Mco1
FBgn0036648	0.763728	0.000511938	0.0129862	protein_coding	CG4098
FBgn0035264	0.760231	0.00029773	0.00836952	protein_coding	Oseg4
FBgn0036262	0.758337	0.00513223	0.0713024	protein_coding	CG6910
FBgn0035571	0.758095	0.000216818	0.00662061	protein_coding	CG12493
FBgn0038113	0.752046	0.0063859	0.0824081	protein_coding	CG11668
FBgn0266810	0.751858	0.00142128	0.0273283	ncRNA	asRNA:CR45272
FBgn0029712	0.751264	0.00804845	0.0973305	protein_coding	CG15912
FBgn0283461	0.751172	0.000508543	0.0129342	protein_coding	Drs
FBgn0031406	0.750642	0.000519011	0.013131	protein_coding	Send1
FBgn0052564	0.750194	0.0881535	0.394377	protein_coding	CG32564
FBgn0031195	0.750076	6.99354e-06	0.000408002	protein_coding	CG17600
FBgn0032381	0.748542	0.047883	0.284692	protein_coding	Mal-B1
FBgn0002719	0.746777	2.89457e-05	0.00132516	protein_coding	Men
FBgn0263236	0.746688	0.00107072	0.022753	protein_coding	SP1029
FBgn0004003	0.743993	0.00838392	0.0992716	protein_coding	wbl
FBgn0038485	0.740877	0.0121051	0.126361	protein_coding	CG5255
FBgn0051104	0.734737	0.0020677	0.036475	protein_coding	CG31104
FBgn0031461	0.733791	0.00839482	0.0992716	protein_coding	daw
FBgn0033356	0.729367	0.000129589	0.00441796	protein_coding	CG8229
FBgn0024232	0.729207	0.00489503	0.0687396	protein_coding	gprs
FBgn0000079	0.727162	6.48049e-05	0.00253266	protein_coding	Amy-p
FBgn0039591	0.72668	0.00429877	0.062524	protein_coding	CG9988
FBgn0053087	0.726277	0.000711119	0.0168391	protein_coding	LRP1
FBgn0260653	0.725088	0.00397115	0.0591	protein_coding	serp
FBgn0267242	0.724687	0.00342064	0.0528714	ncRNA	asRNA:CR45682
FBgn0032131	0.723726	1.01606e-06	8.34905e-05	protein_coding	CG3841
FBgn0033999	0.721679	0.000613608	0.0148595	protein_coding	CG8093
FBgn0039642	0.719979	0.00523213	0.0721689	protein_coding	CG11882
FBgn0261975	0.718777	4.63487e-05	0.00192067	protein_coding	CG42806
FBgn0260780	0.717866	0.0101744	0.113608	protein_coding	wisp
FBgn0032405	0.716648	0.00571026	0.076508	protein_coding	firl
FBgn0039821	0.715821	0.00128927	0.0255569	protein_coding	CG15556
FBgn0051288	0.713811	0.00228641	0.0394298	protein_coding	CG31288
FBgn0052512	0.712579	0.00159699	0.0298126	protein_coding	CG32512
FBgn0033584	0.710581	0.000178553	0.00574116	protein_coding	CG7737
FBgn0004426	0.710463	0.00125236	0.0251394	pseudogene	LysC
FBgn0086691	0.710378	0.00134368	0.0264175	protein_coding	UK114
FBgn0033853	0.707354	0.00108868	0.0229028	protein_coding	CG6145
FBgn0040942	0.703255	0.00330188	0.0515245	protein_coding	CG12643
FBgn0011722	0.701328	0.309197	0.690372	protein_coding	Tig
FBgn0036659	0.700698	0.0010721	0.022753	protein_coding	CG9701
FBgn0270926	0.700644	0.011561	0.123635	protein_coding	AsnS
FBgn0264721	0.700026	0.0108746	0.119076	ncRNA	lncRNA:CR43989
FBgn0051148	0.69911	0.00281957	0.0457122	protein_coding	Gba1a
FBgn0034198	0.697714	0.00135767	0.0265514	protein_coding	CG11400
FBgn0032420	0.69427	0.00713647	0.0888731	protein_coding	CG6583
FBgn0041780	0.692727	0.00478935	0.0678126	protein_coding	Ssl2
FBgn0010044	0.691606	0.0088294	0.102519	protein_coding	GstD8
FBgn0000261	0.690732	0.000192287	0.00612135	protein_coding	Cat
FBgn0051674	0.688847	1.04738e-05	0.000545104	protein_coding	CG31674
FBgn0265596	0.688481	0.00405362	0.0601412	ncRNA	lncRNA:CR44423
FBgn0039754	0.686741	0.0115262	0.1234	protein_coding	CG9747
FBgn0032603	0.683581	0.00293054	0.047193	protein_coding	CG17928
FBgn0264448	0.681478	0.00362642	0.0552526	ncRNA	asRNA:CR43866
FBgn0039225	0.681277	0.00315654	0.0496678	protein_coding	Ets96B
FBgn0036927	0.681035	0.00846506	0.0997341	protein_coding	Gabat
FBgn0038858	0.679404	0.00795637	0.0965815	protein_coding	CG5793
FBgn0036144	0.678382	0.00591647	0.0781768	protein_coding	GlcAT-P
FBgn0039349	0.676841	3.12138e-05	0.00139577	protein_coding	Ssadh
FBgn0039634	0.67673	0.000195312	0.00617024	protein_coding	alpha-Man-Ib
FBgn0033652	0.674056	0.0139785	0.136476	protein_coding	ths
FBgn0284226	0.673913	0.00333504	0.0517983	protein_coding	CG46310
FBgn0052636	0.670682	0.0102942	0.114679	ncRNA	lncRNA:CR32636
FBgn0023495	0.6706	0.000946994	0.0208339	protein_coding	Lip3
FBgn0035696	0.669669	0.00223382	0.0389762	protein_coding	Best2
FBgn0039411	0.667437	0.0763901	0.369238	protein_coding	dysf
FBgn0263046	0.666427	0.0156777	0.147137	protein_coding	CG43341
FBgn0003358	0.664583	0.00192452	0.0345837	protein_coding	Jon99Ci
FBgn0044872	0.662484	0.000221967	0.00668962	protein_coding	FucTC
FBgn0264915	0.661959	0.00653997	0.0836107	ncRNA	asRNA:CR44106
FBgn0034784	0.661377	0.016833	0.154864	protein_coding	CG9826
FBgn0034261	0.660876	8.5009e-06	0.000467966	protein_coding	HPS4
FBgn0053346	0.660791	0.000970899	0.0212589	protein_coding	CG33346
FBgn0036066	0.659273	1.05162e-07	1.23296e-05	protein_coding	CG14160
FBgn0030777	0.658414	0.00109478	0.0229345	protein_coding	CG9672
FBgn0050421	0.657894	0.000225241	0.0067671	protein_coding	Usp15-31
FBgn0037563	0.656155	0.00393422	0.0587422	protein_coding	CG11672
FBgn0032891	0.655885	0.00489706	0.0687396	protein_coding	Oseg5
FBgn0032864	0.655136	0.000761637	0.0177297	protein_coding	CG2493
FBgn0035348	0.65443	0.000776672	0.0179926	protein_coding	CG16758
FBgn0051100	0.651945	0.0196816	0.170621	protein_coding	CG31100
FBgn0011770	0.651268	0.00669782	0.0852281	protein_coding	Gip
FBgn0050148	0.650737	0.0111403	0.121294	protein_coding	CG30148
FBgn0001090	0.649073	0.814115	0.949731	protein_coding	bnb
FBgn0053099	0.648435	0.00108827	0.0229028	protein_coding	CG33099
FBgn0030803	0.646483	0.00113462	0.0234405	protein_coding	CG4880
FBgn0035781	0.645393	0.002605	0.0432547	protein_coding	CG8560
FBgn0035577	0.643832	0.0130041	0.131711	protein_coding	CG13708
FBgn0285970	0.643017	0.0184936	0.162847	protein_coding	CG32500
FBgn0037941	0.640251	0.0229776	0.189041	protein_coding	CG12594
FBgn0038610	0.638389	0.0212733	0.179562	protein_coding	CG7675
FBgn0050360	0.638371	0.0024672	0.0416069	protein_coding	Mal-A6
FBgn0051810	0.636926	0.0125825	0.129517	protein_coding	CG31810
FBgn0001124	0.636101	9.23288e-06	0.000493869	protein_coding	Got1
FBgn0038115	0.635002	0.0110936	0.120923	protein_coding	CG7966
FBgn0038063	0.634822	0.0196579	0.17057	protein_coding	Octbeta2R
FBgn0030518	0.634012	8.93448e-06	0.000482562	protein_coding	CG11134
FBgn0038702	0.633803	0.028249	0.212177	protein_coding	CG3739
FBgn0036992	0.633419	0.0194041	0.168978	protein_coding	Hpd
FBgn0031002	0.632608	7.17887e-05	0.00274571	protein_coding	CG14196
FBgn0015399	0.63202	0.0144473	0.139875	protein_coding	kek1
FBgn0015904	0.63007	0.00925162	0.105887	protein_coding	ara
FBgn0035936	0.629654	0.0106664	0.117331	protein_coding	Tsp66E
FBgn0000078	0.629034	0.000698642	0.0165845	protein_coding	Amy-d
FBgn0010549	0.628612	0.0190559	0.1667	protein_coding	l(2)03659
FBgn0051300	0.623799	0.000428523	0.0112872	protein_coding	CG31300
FBgn0033450	0.621092	0.00839457	0.0992716	protein_coding	Lsm11
FBgn0051636	0.620413	0.00709128	0.0886548	protein_coding	CG31636
FBgn0038716	0.620342	0.0483654	0.286851	protein_coding	CG7342
FBgn0027556	0.617748	0.000270435	0.00780487	protein_coding	CG4928
FBgn0020906	0.614467	0.00105108	0.0224557	protein_coding	Jon25Bi
FBgn0039203	0.614457	0.0169009	0.155088	protein_coding	CG13618
FBgn0053082	0.614013	7.98225e-05	0.00297447	protein_coding	Rpp21
FBgn0035815	0.613594	0.0114077	0.122812	protein_coding	Snmp2
FBgn0086408	0.613051	0.024776	0.19751	protein_coding	stl
FBgn0034782	0.612487	0.0127541	0.130723	protein_coding	CG12490
FBgn0035300	0.610157	0.0218127	0.18299	protein_coding	CG1139
FBgn0035131	0.609303	0.00823126	0.0985641	protein_coding	mthl9
FBgn0031630	0.609075	0.00308315	0.0488109	protein_coding	CG15629
FBgn0267995	0.608738	0.00212808	0.0373346	ncRNA	asRNA:CR46262
FBgn0031654	0.607906	0.000215565	0.00662061	protein_coding	Jon25Bii
FBgn0039768	0.607752	0.0114554	0.122895	protein_coding	CG15533
FBgn0032021	0.60704	0.0408028	0.260943	protein_coding	CG7781
FBgn0052187	0.606114	0.0300464	0.219025	protein_coding	CG32187
FBgn0030883	0.605048	0.00126033	0.0251394	protein_coding	CG7772
FBgn0266489	0.604665	0.000450705	0.0118067	protein_coding	CG45088
FBgn0034858	0.602939	1.13478e-05	0.000577235	protein_coding	eIF2Bdelta
FBgn0013953	0.602613	0.0327516	0.231355	protein_coding	Esp
FBgn0002570	0.60189	0.00573145	0.0765308	protein_coding	Mal-A1
FBgn0035518	0.601162	0.000764698	0.017758	protein_coding	CG15011
FBgn0051793	0.601131	0.00228852	0.0394298	protein_coding	CG31793
FBgn0015569	0.600664	0.0230366	0.189041	protein_coding	alpha-Est10
FBgn0040297	0.600197	0.00138814	0.0269694	protein_coding	Nhe2
FBgn0033633	0.598403	0.00776407	0.0953305	protein_coding	Smyd4-3
FBgn0037222	0.596321	0.0246526	0.197243	protein_coding	CG14642
FBgn0034081	0.594736	0.00156083	0.0293082	protein_coding	CG10731
FBgn0032494	0.592885	0.0273181	0.207617	protein_coding	CG5945
FBgn0031267	0.592642	0.000289196	0.0082045	protein_coding	Ipk2
FBgn0022355	0.591946	0.0355747	0.242049	protein_coding	Tsf1
FBgn0264488	0.591919	0.0352361	0.240426	protein_coding	CG43896
FBgn0052557	0.591738	0.0090031	0.104159	protein_coding	Mco4
FBgn0028573	0.590957	0.0232908	0.190083	protein_coding	prc
FBgn0029839	0.590351	0.027149	0.206987	protein_coding	CG4660
FBgn0046114	0.588863	0.00279968	0.0454665	protein_coding	Gclm
FBgn0263355	0.588856	0.00555764	0.0750304	protein_coding	CG31688
FBgn0027538	0.588539	0.000390124	0.0103963	protein_coding	beta4GalNAcTA
FBgn0015039	0.588529	9.75275e-05	0.00352492	protein_coding	Cyp9b2
FBgn0035802	0.588468	0.00173132	0.0316443	protein_coding	Pura
FBgn0033798	0.587513	0.0153071	0.145085	protein_coding	CG15870
FBgn0266181	0.58744	0.0129082	0.131601	ncRNA	lncRNA:CRG
FBgn0039417	0.587235	0.0132395	0.132312	protein_coding	CG6073
FBgn0017561	0.585841	0.000780802	0.0180448	protein_coding	Ork1
FBgn0003162	0.584944	0.00739597	0.0917482	protein_coding	Pu
FBgn0086367	0.58294	0.00507681	0.0707369	protein_coding	t
FBgn0052446	0.582294	1.05141e-05	0.000545104	protein_coding	Atox1
FBgn0037057	0.581653	8.30237e-06	0.000464064	protein_coding	CG10512
FBgn0026755	0.581418	0.0229551	0.189041	protein_coding	Ugt37B1
FBgn0260484	0.580409	0.000121722	0.00420922	protein_coding	HIP
FBgn0036369	0.579205	0.0241328	0.193991	protein_coding	CG10089
FBgn0025383	0.577879	0.0197255	0.170847	protein_coding	CG14780
FBgn0001248	0.577871	0.00544118	0.0739397	protein_coding	Idh
FBgn0261575	0.575059	0.0340383	0.236448	protein_coding	tobi
FBgn0020521	0.574589	0.0164169	0.152241	protein_coding	pio
FBgn0039844	0.574529	0.0045231	0.0647099	protein_coding	CG1607
FBgn0033792	0.573868	0.0763028	0.369187	protein_coding	CG13325
FBgn0003308	0.573714	0.0174095	0.1582	protein_coding	ry
FBgn0031632	0.572817	0.0427049	0.267196	protein_coding	CG15628
FBgn0058354	0.572435	0.0257255	0.201734	pseudogene	CR40354
FBgn0034909	0.571773	0.0171052	0.156234	protein_coding	CG4797
FBgn0010387	0.571468	0.000159195	0.00525944	protein_coding	Acbp2
FBgn0033631	0.569405	0.000815505	0.018623	protein_coding	Sod3
FBgn0038916	0.569296	0.000195287	0.00617024	protein_coding	dnd
FBgn0035091	0.566916	0.00279887	0.0454665	protein_coding	CG3829
FBgn0038144	0.566376	0.044874	0.275015	protein_coding	CG8870
FBgn0000477	0.565758	0.0120503	0.126107	protein_coding	DNaseII
FBgn0035985	0.565528	0.0262124	0.203403	protein_coding	Cpr67B
FBgn0037560	0.565318	1.95318e-05	0.000929597	pseudogene	CR18228
FBgn0033873	0.5636	0.0170332	0.156108	protein_coding	CG6337
FBgn0029608	0.562586	6.08816e-05	0.00241866	protein_coding	CG3091
FBgn0051687	0.560447	0.00849395	0.0998946	protein_coding	CG31687
FBgn0030362	0.560031	0.000898848	0.0200664	protein_coding	regucalcin
FBgn0086368	0.55919	0.02403	0.193813	protein_coding	tw
FBgn0264550	0.558151	0.0516212	0.297806	ncRNA	lncRNA:CR43929
FBgn0054031	0.557347	0.3408	0.718666	protein_coding	CG34031
FBgn0015570	0.554695	0.0347986	0.239651	protein_coding	alpha-Est2
FBgn0033913	0.554483	0.00612067	0.0799512	protein_coding	CG8468
FBgn0015919	0.552273	0.0131086	0.131827	protein_coding	caup
FBgn0034407	0.551942	0.0121825	0.126893	protein_coding	DptB
FBgn0030157	0.551214	0.0618306	0.326794	protein_coding	CG1468
FBgn0038924	0.550816	6.1953e-05	0.00244105	protein_coding	CG6028
FBgn0032082	0.550521	0.0277747	0.20972	protein_coding	CG18088
FBgn0051089	0.54949	0.0104481	0.115564	protein_coding	CG31089
FBgn0264746	0.548823	0.0688231	0.349248	protein_coding	CG44004
FBgn0050489	0.548145	0.0198129	0.171296	protein_coding	Cyp12d1-p
FBgn0027581	0.546614	0.00126397	0.025159	protein_coding	CG6191
FBgn0263768	0.546423	0.0143081	0.139229	ncRNA	lncRNA:CR43685
FBgn0086674	0.546099	2.86051e-05	0.00131584	protein_coding	Tpst
FBgn0004795	0.545855	0.0167058	0.154136	protein_coding	retn
FBgn0036502	0.545492	0.00617955	0.0806108	protein_coding	CG7841
FBgn0285991	0.544265	1.73037e-05	0.000840191	ncRNA	hpRNA:CR18854
FBgn0265611	0.544088	0.0459531	0.278383	ncRNA	asRNA:CR44429
FBgn0031690	0.542812	0.0725107	0.358885	protein_coding	CG7742
FBgn0003447	0.542557	0.00782788	0.0956255	protein_coding	sn
FBgn0024957	0.542244	0.00516586	0.0715628	protein_coding	Irp-1B
FBgn0040091	0.541654	0.0437168	0.271157	protein_coding	Ugt317A1
FBgn0031801	0.539684	0.0315962	0.226522	protein_coding	CG9498
FBgn0033968	0.53967	0.0155629	0.146559	protein_coding	hui
FBgn0052843	0.539645	0.0230649	0.189041	protein_coding	Dh31-R
FBgn0038547	0.53934	0.0515841	0.297806	protein_coding	CG17803
FBgn0085232	0.538838	0.512803	0.83445	protein_coding	CG34203
FBgn0029155	0.538233	0.0519759	0.298683	protein_coding	Men-b
FBgn0027552	0.538093	0.000271961	0.00780487	protein_coding	CG10863
FBgn0263241	0.537424	0.0117653	0.124665	protein_coding	Mocs1
FBgn0038598	0.537031	0.0472967	0.283486	protein_coding	CG7131
FBgn0030310	0.534787	0.0324307	0.230103	protein_coding	PGRP-SA
FBgn0035298	0.534527	0.00711779	0.0887554	protein_coding	SCOT
FBgn0263446	0.534119	0.0476628	0.284262	ncRNA	asRNA:CR43469
FBgn0263106	0.533936	0.0210988	0.178875	protein_coding	DnaJ-1
FBgn0013432	0.533746	0.0038268	0.0575053	protein_coding	bcn92
FBgn0063491	0.533522	0.0118563	0.125122	protein_coding	GstE9
FBgn0052281	0.532608	0.0221873	0.184523	protein_coding	CG32281
FBgn0263973	0.530815	0.00741036	0.0918082	protein_coding	jv
FBgn0026415	0.530506	0.00022665	0.00678819	protein_coding	Idgf4
FBgn0037973	0.527576	0.0134856	0.134075	protein_coding	CG18547
FBgn0038207	0.527481	0.0569305	0.312224	protein_coding	CG14356
FBgn0263507	0.527421	0.0222731	0.184917	ncRNA	lncRNA:CR43496
FBgn0043575	0.527271	0.0203938	0.174647	protein_coding	PGRP-SC2
FBgn0037592	0.527166	0.00297573	0.0477607	protein_coding	CG11737
FBgn0030148	0.527028	0.0338266	0.235871	protein_coding	CG3106
FBgn0051463	0.526487	0.00555602	0.0750304	protein_coding	CG31463
FBgn0086558	0.526087	0.0119933	0.126107	protein_coding	Ubi-p5E
FBgn0284223	0.525211	0.0254717	0.200949	protein_coding	CG46307
FBgn0033296	0.525139	0.021984	0.183786	protein_coding	Mal-A7
FBgn0014343	0.524522	0.0129627	0.131711	protein_coding	mirr
FBgn0032495	0.52413	0.0687128	0.348972	protein_coding	CG16820
FBgn0050381	0.523666	0.0113482	0.122812	protein_coding	PIG-X
FBgn0027073	0.5236	0.000926871	0.0205321	protein_coding	Ugt49B1
FBgn0250836	0.523583	0.0117741	0.124665	protein_coding	Acbp3
FBgn0037816	0.522885	0.0122009	0.126948	protein_coding	CG6345
FBgn0038972	0.522311	0.000380466	0.0102173	protein_coding	CG7054
FBgn0003429	0.522272	0.0250207	0.198965	protein_coding	slo
FBgn0050371	0.52225	0.0336727	0.235314	protein_coding	CG30371
FBgn0036316	0.520831	9.72643e-05	0.00352492	protein_coding	CG10960
FBgn0054040	0.520119	0.0546299	0.304118	protein_coding	CG34040
FBgn0010042	0.518256	0.0186927	0.16412	protein_coding	GstD6
FBgn0029932	0.518252	0.0511757	0.296387	protein_coding	CG4607
FBgn0004512	0.517912	0.0155644	0.146559	protein_coding	Mdr49
FBgn0063298	0.517063	0.0391777	0.255593	ncRNA	asRNA:CR31429
FBgn0033826	0.517049	0.0082446	0.0985641	protein_coding	CG4734
FBgn0001330	0.516337	0.0164682	0.152529	protein_coding	kz
FBgn0064912	0.514132	0.0863675	0.390502	protein_coding	CG31178
FBgn0053965	0.512519	0.023688	0.192102	protein_coding	CG33965
FBgn0034428	0.512422	0.17005	0.543616	protein_coding	AANATL6
FBgn0023526	0.512279	0.0345324	0.238845	protein_coding	CG2865
FBgn0037906	0.510254	0.00140583	0.0271686	protein_coding	PGRP-LB
FBgn0259237	0.50927	0.00393489	0.0587422	protein_coding	CG42335
FBgn0038431	0.509182	0.0346903	0.239249	protein_coding	CG10405
FBgn0038865	0.506922	0.0629878	0.331091	protein_coding	cDIP
FBgn0038660	0.506722	0.0774376	0.372242	protein_coding	Sgsh
FBgn0033778	0.506646	0.0302801	0.219874	protein_coding	Balat
FBgn0031961	0.506547	0.0741294	0.362736	protein_coding	CG7102
FBgn0028899	0.506509	0.058369	0.316518	protein_coding	CG31817
FBgn0032783	0.50578	0.0461859	0.27909	protein_coding	CG10237
FBgn0002564	0.504713	0.13443	0.485712	protein_coding	Lsp1gamma
FBgn0001149	0.50455	0.000793673	0.0182545	protein_coding	GstD1
FBgn0261393	0.504387	0.000489035	0.0125436	protein_coding	alpha-Est5
FBgn0034290	0.50386	0.00556446	0.0750304	protein_coding	CG5773
FBgn0030984	0.503801	0.000714671	0.0168817	protein_coding	tgy
FBgn0051619	0.503667	0.0649864	0.337901	protein_coding	nolo
FBgn0023129	0.503482	0.0488443	0.287915	protein_coding	aay
FBgn0030576	0.503468	0.0688437	0.349248	protein_coding	CG15890
FBgn0266702	0.502934	0.0474368	0.283747	ncRNA	asRNA:CR45192
FBgn0023527	0.502663	0.0253098	0.200271	protein_coding	CG3071
FBgn0033320	0.502361	0.0279737	0.210767	protein_coding	CG8586
FBgn0050151	0.501902	0.0392449	0.255593	protein_coding	CG30151
FBgn0085380	0.501645	0.0422493	0.265791	protein_coding	CG34351
FBgn0033879	0.50153	0.000929854	0.0205509	protein_coding	Echs1
FBgn0265413	0.500971	0.000230908	0.00689425	protein_coding	CG44325
FBgn0036620	0.500542	0.0554713	0.307578	protein_coding	CG4842
FBgn0266362	0.500269	0.0130919	0.131827	ncRNA	lncRNA:CR45010
FBgn0038804	0.499324	0.0203685	0.174647	protein_coding	CG10877
FBgn0030407	0.498761	0.00277582	0.0453181	protein_coding	Fpgs
FBgn0259834	0.49872	0.00194576	0.0349003	protein_coding	out
FBgn0035557	0.498441	0.0532843	0.301571	protein_coding	CG11353
FBgn0031554	0.497582	0.066852	0.343258	protein_coding	CG15418
FBgn0024182	0.497565	0.00101218	0.0219562	protein_coding	waw
FBgn0085224	0.497499	0.0377869	0.24962	protein_coding	CG34195
FBgn0003867	0.496908	0.0442759	0.27269	protein_coding	tsl
FBgn0263607	0.496825	0.00514992	0.0714449	protein_coding	l(3)72Dp
FBgn0036203	0.496129	0.0438819	0.271655	protein_coding	Muc68D
FBgn0039494	0.495956	0.0477408	0.284433	protein_coding	grass
FBgn0263981	0.495642	0.0884993	0.395031	ncRNA	asRNA:CR43730
FBgn0053510	0.49552	0.0704206	0.353683	protein_coding	CG33510
FBgn0260856	0.495468	0.0174613	0.158371	protein_coding	Membrin
FBgn0261930	0.49544	0.000956686	0.020999	protein_coding	vnd
FBgn0053172	0.49508	0.0227076	0.187875	protein_coding	CG33172
FBgn0039151	0.49434	0.0588669	0.317951	protein_coding	CG13607
FBgn0263234	0.494256	0.00243661	0.0414611	protein_coding	Phae1
FBgn0034582	0.49396	0.0420504	0.265445	protein_coding	Cht9
FBgn0051077	0.492705	0.0790753	0.374135	protein_coding	CG31077
FBgn0266569	0.492187	0.02484	0.197692	protein_coding	CG42259
FBgn0029849	0.491555	0.00386091	0.0579076	protein_coding	Efr
FBgn0265169	0.491093	0.0359216	0.242856	ncRNA	asRNA:CR44238
FBgn0031397	0.490479	0.0270606	0.206663	protein_coding	CG15385
FBgn0028562	0.489952	0.020051	0.172579	protein_coding	sut2
FBgn0053080	0.489629	0.00200416	0.0358584	protein_coding	CG33080
FBgn0040532	0.489365	0.0486969	0.287752	protein_coding	CG8369
FBgn0031633	0.488162	0.00056987	0.0140444	protein_coding	Fnta
FBgn0051326	0.488017	0.0789702	0.374015	protein_coding	CG31326
FBgn0030769	0.487776	0.168536	0.540935	protein_coding	CG13012
FBgn0052095	0.487619	0.043206	0.269204	protein_coding	CG32095
FBgn0036837	0.487552	0.0316945	0.226703	protein_coding	CG18135
FBgn0000566	0.487397	0.00621429	0.0808447	protein_coding	Eip55E
FBgn0031703	0.48647	0.0206515	0.17617	protein_coding	CG12512
FBgn0011706	0.486221	0.0780804	0.372718	protein_coding	rpr
FBgn0260659	0.485768	0.012691	0.130493	protein_coding	CG42542
FBgn0284084	0.485569	0.0614143	0.325669	protein_coding	wg
FBgn0260746	0.484756	0.0755617	0.366894	protein_coding	Ect3
FBgn0053966	0.484704	0.00267039	0.0439226	protein_coding	CG33966
FBgn0029969	0.484663	0.00566497	0.076172	protein_coding	CG10932
FBgn0020236	0.483456	0.00368595	0.055894	protein_coding	ATPCL
FBgn0051809	0.481728	0.0276777	0.209193	protein_coding	CG31809
FBgn0019643	0.481523	0.00172953	0.0316443	protein_coding	AANAT1
FBgn0032149	0.481072	0.0240045	0.193769	protein_coding	CG4036
FBgn0028993	0.480842	0.0725805	0.358905	NA	NA
FBgn0000427	0.480333	0.0167674	0.154408	protein_coding	2001-12-01
FBgn0284247	0.48017	0.0757733	0.367238	protein_coding	ds
FBgn0031049	0.480055	7.31236e-05	0.0027787	protein_coding	Sec61gamma
FBgn0004556	0.479673	0.0339894	0.236279	protein_coding	Dbp73D
FBgn0262870	0.479394	0.00161078	0.0300118	protein_coding	axo
FBgn0019952	0.478949	0.00892448	0.103373	protein_coding	Orct
FBgn0024997	0.478876	0.00957793	0.108844	protein_coding	CG2681
FBgn0030478	0.478809	0.000480436	0.0123831	protein_coding	CG1640
FBgn0034663	0.477929	0.019765	0.171036	protein_coding	CG4363
FBgn0030590	0.477757	0.239694	0.625327	protein_coding	CG9518
FBgn0023537	0.477491	0.0110796	0.120907	protein_coding	CG17896
FBgn0086451	0.47733	0.0108234	0.118705	protein_coding	l(2)k09022
FBgn0050043	0.476659	0.0062094	0.0808447	protein_coding	CG30043
FBgn0039098	0.476421	0.0854076	0.388783	protein_coding	GILT3
FBgn0032889	0.47608	0.0145546	0.140537	protein_coding	CG9331
FBgn0025643	0.475955	0.0726471	0.358905	protein_coding	CG3588
FBgn0037727	0.475231	0.0247992	0.19753	protein_coding	Nepl12
FBgn0004428	0.474651	0.0551442	0.306449	protein_coding	LysE
FBgn0259098	0.473237	0.0881695	0.394377	protein_coding	CG42246
FBgn0035476	0.47297	0.0954378	0.409007	protein_coding	CG12766
FBgn0052554	0.472806	0.0621821	0.32764	protein_coding	CG32554
FBgn0030251	0.472775	0.150712	0.512349	protein_coding	CG2145
FBgn0014427	0.472541	0.0062944	0.0813365	protein_coding	CG11899
FBgn0037248	0.472173	0.0135527	0.134325	protein_coding	srl
FBgn0034488	0.472114	0.000822332	0.0187344	protein_coding	Hacl
FBgn0024994	0.471868	0.00031845	0.00879764	protein_coding	Ugalt
FBgn0036764	0.471741	0.173595	0.547555	protein_coding	CG5535
FBgn0260390	0.471181	0.0991907	0.41645	protein_coding	CG42516
FBgn0053533	0.471021	0.00411514	0.0608658	protein_coding	lectin-37Db
FBgn0038126	0.470834	0.0607267	0.323092	protein_coding	CG8483
FBgn0037433	0.470116	0.065948	0.34124	protein_coding	CG17919
FBgn0002569	0.469002	0.0228722	0.188912	protein_coding	Mal-A2
FBgn0063492	0.468919	0.034365	0.238201	protein_coding	GstE8
FBgn0086450	0.468347	0.00837902	0.0992716	protein_coding	su(r)
FBgn0002985	0.467918	0.00119668	0.0243233	protein_coding	odd
FBgn0039183	0.467357	0.0147521	0.141685	protein_coding	Dis3
FBgn0040363	0.467146	0.0372548	0.246994	protein_coding	CG11384
FBgn0038860	0.467033	0.0441619	0.272336	protein_coding	Ice2
FBgn0039620	0.4667	0.0599484	0.32083	protein_coding	wat
FBgn0050187	0.466597	0.0842117	0.385673	protein_coding	CG30187
FBgn0033258	0.466582	0.0382312	0.251406	protein_coding	CG8712
FBgn0036665	0.466165	0.0593443	0.319426	protein_coding	CG13024
FBgn0264368	0.465897	0.106528	0.432992	ncRNA	asRNA:CR43820
FBgn0029833	0.465022	0.000114701	0.00401169	protein_coding	MCTS1
FBgn0264945	0.463155	0.0809709	0.378994	ncRNA	asRNA:CR44114
FBgn0032449	0.462877	0.0396833	0.256647	protein_coding	CG17036
FBgn0283427	0.46267	0.0283234	0.212217	protein_coding	FASN1
FBgn0029532	0.461427	0.0806054	0.37802	protein_coding	CG13361
FBgn0034318	0.461271	0.0569816	0.312327	protein_coding	CG14500
FBgn0033927	0.460746	0.0977722	0.412726	pseudogene	CR10102
FBgn0051248	0.459656	0.0125331	0.129146	protein_coding	CG31248
FBgn0085227	0.459354	0.0131743	0.132058	protein_coding	CG34198
FBgn0266349	0.459033	0.0457176	0.277946	ncRNA	asRNA:CR44998
FBgn0037167	0.458938	0.711799	0.917416	protein_coding	CG11425
FBgn0050083	0.45846	0.0529893	0.301571	protein_coding	CG30083
FBgn0000024	0.458387	0.0176379	0.159072	protein_coding	Ace
FBgn0032078	0.457753	6.94895e-06	0.000408002	protein_coding	C1GalTA
FBgn0042185	0.457348	0.0224243	0.186011	protein_coding	MCU
FBgn0034664	0.456811	0.0366149	0.244965	protein_coding	CG4377
FBgn0086350	0.456161	0.0651294	0.338294	protein_coding	tef
FBgn0284227	0.455026	0.023842	0.19262	protein_coding	CG46311
FBgn0027356	0.454428	0.0175742	0.159072	protein_coding	Amph
FBgn0027570	0.454054	0.0369858	0.246237	protein_coding	Nep2
FBgn0038079	0.453926	0.0338643	0.235871	protein_coding	NijC
FBgn0051191	0.453732	0.101928	0.423629	protein_coding	CG31191
FBgn0053970	0.453179	0.0337036	0.235314	protein_coding	CG33970
FBgn0024315	0.452713	0.0536285	0.302126	protein_coding	Picot
FBgn0031836	0.452143	0.0180816	0.161408	protein_coding	CG11050
FBgn0030612	0.451469	0.000572645	0.0140444	protein_coding	CG5599
FBgn0028952	0.45138	0.0450671	0.275445	protein_coding	Kebab
FBgn0033665	0.451269	0.00700869	0.0878508	protein_coding	Zip48C
FBgn0267450	0.451249	0.0847598	0.386815	ncRNA	asRNA:CR45800
FBgn0027843	0.451116	0.0283774	0.212217	protein_coding	CAH2
FBgn0043470	0.451007	0.00549442	0.074504	protein_coding	lambdaTry
FBgn0053156	0.450858	0.0597546	0.32076	protein_coding	CG33156
FBgn0033192	0.449531	0.0622241	0.32764	protein_coding	Corin
FBgn0034985	0.449262	0.0750429	0.365483	protein_coding	CG3328
FBgn0027070	0.449248	0.0620936	0.32764	protein_coding	Ugt36E1
FBgn0031877	0.448974	0.0157256	0.147355	protein_coding	Hmgcl
FBgn0035934	0.44889	0.0795096	0.375317	protein_coding	TrpA1
FBgn0037819	0.44876	0.0616761	0.326157	protein_coding	CG14688
FBgn0011695	0.448124	0.0764451	0.369318	protein_coding	EbpIII
FBgn0051976	0.446202	0.0878576	0.39415	protein_coding	ovm
FBgn0050495	0.446078	0.0143583	0.139435	protein_coding	CG30495
FBgn0004425	0.44606	0.133105	0.483171	protein_coding	LysB
FBgn0037164	0.445705	0.0295531	0.217552	protein_coding	CG11438
FBgn0033096	0.445012	0.0532278	0.301571	protein_coding	Zip42C.1
FBgn0010241	0.443924	0.0496348	0.290969	protein_coding	Mdr50
FBgn0029994	0.443739	0.01136	0.122812	protein_coding	Ldsdh1
FBgn0032919	0.443443	0.0177709	0.159632	protein_coding	CG9253
FBgn0265499	0.443403	0.0463824	0.279399	ncRNA	asRNA:CR44368
FBgn0031979	0.442901	0.037001	0.246237	protein_coding	CCDC53
FBgn0051792	0.442437	0.0531583	0.301571	protein_coding	CG31792
FBgn0033905	0.441745	0.00101642	0.0219592	protein_coding	CG18324
FBgn0031629	0.440933	0.0939759	0.406661	NA	NA
FBgn0033246	0.440411	0.00140658	0.0271686	protein_coding	ACC
FBgn0034054	0.440384	0.0153174	0.145085	protein_coding	CG8366
FBgn0037912	0.44038	0.0117516	0.124665	protein_coding	sea
FBgn0050047	0.440189	0.0297814	0.218136	protein_coding	CG30047
FBgn0032329	0.439765	0.0560365	0.309085	protein_coding	Art8
FBgn0000473	0.439554	0.039494	0.256212	protein_coding	Cyp6a2
FBgn0025620	0.439537	0.025944	0.202208	protein_coding	CG13360
FBgn0038878	0.438384	0.00584161	0.0775484	protein_coding	CG3301
FBgn0003656	0.438052	0.0396817	0.256647	protein_coding	sws
FBgn0035844	0.438043	0.151815	0.512951	protein_coding	CG13676
FBgn0039945	0.436983	0.013015	0.131711	protein_coding	CG17159
FBgn0050197	0.436369	0.0392934	0.255593	protein_coding	CG30197
FBgn0036294	0.436339	0.113847	0.44821	protein_coding	CG10654
FBgn0033451	0.435901	0.00475193	0.067382	protein_coding	Marc
FBgn0027617	0.435723	0.0339344	0.236067	protein_coding	CG5808
FBgn0039042	0.435382	0.128442	0.47494	protein_coding	CG13837
FBgn0003651	0.435356	0.261549	0.647588	protein_coding	svp
FBgn0036187	0.435335	0.0587348	0.317591	protein_coding	RIOK1
FBgn0040531	0.435099	0.132653	0.482346	protein_coding	CG11741
FBgn0028563	0.434589	0.00459777	0.065583	protein_coding	sut1
FBgn0063485	0.434389	0.000587216	0.0143287	protein_coding	Lasp
FBgn0266445	0.434301	0.102019	0.423629	protein_coding	CG45075
FBgn0029804	0.434186	0.0782554	0.372718	protein_coding	CG3097
FBgn0037670	0.433969	0.0206247	0.176098	protein_coding	Ibf1
FBgn0024289	0.433369	0.0651323	0.338294	protein_coding	Sodh-1
FBgn0266431	0.43268	0.154559	0.517127	protein_coding	CG45061
FBgn0039472	0.432163	0.170028	0.543616	protein_coding	CG17192
FBgn0043841	0.432141	0.0252056	0.199682	protein_coding	vir-1
FBgn0029755	0.431623	0.0584459	0.316741	protein_coding	Sas10
FBgn0042083	0.430896	0.00131331	0.0258733	protein_coding	Mccc2
FBgn0035480	0.430883	0.134631	0.48584	protein_coding	CG14984
FBgn0015801	0.429875	0.0529177	0.301571	protein_coding	Reg-5
FBgn0036279	0.429758	0.010169	0.113608	protein_coding	Ncc69
FBgn0015622	0.428984	8.76889e-05	0.00321772	protein_coding	Cnx99A
FBgn0264443	0.428544	0.111039	0.443103	protein_coding	CG43861
FBgn0030828	0.427894	0.0293934	0.217097	protein_coding	CG5162
FBgn0039709	0.427531	0.0867228	0.391781	protein_coding	Cad99C
FBgn0038407	0.427456	0.026973	0.206464	protein_coding	CG6126
FBgn0085249	0.427456	0.087299	0.392098	protein_coding	CG34220
FBgn0263457	0.427338	0.112667	0.445904	ncRNA	asRNA:CR43480
FBgn0039355	0.427091	0.0921348	0.403475	protein_coding	CG4730
FBgn0036778	0.426751	0.137045	0.490973	protein_coding	Cyp312a1
FBgn0035780	0.426477	0.00135029	0.0264932	protein_coding	CG18417
FBgn0032925	0.426121	0.0251722	0.199674	protein_coding	CG9246
FBgn0035733	0.426014	0.12096	0.459686	protein_coding	CG8641
FBgn0023083	0.425988	0.00467968	0.0665539	protein_coding	fray
FBgn0036680	0.424432	0.084407	0.385783	protein_coding	Cpr73D
FBgn0028534	0.424103	0.0608307	0.323466	protein_coding	CG7916
FBgn0010786	0.423723	0.0124151	0.128205	protein_coding	l(3)02640
FBgn0020508	0.423264	0.0545157	0.30401	protein_coding	Ag5r2
FBgn0264753	0.422947	0.0616298	0.326157	protein_coding	Rgk1
FBgn0261503	0.422478	0.0939881	0.406661	ncRNA	lncRNA:CR42651
FBgn0036942	0.421888	0.0351576	0.240402	protein_coding	CG7328
FBgn0035392	0.421842	0.00643078	0.0828761	protein_coding	CG1271
FBgn0003896	0.42184	0.0896595	0.398132	protein_coding	tup
FBgn0037469	0.421692	0.0121658	0.126857	protein_coding	Dpck
FBgn0040349	0.421467	0.095561	0.409007	protein_coding	CG3699
FBgn0032136	0.42135	0.102228	0.423629	protein_coding	Apoltp
FBgn0001233	0.42103	0.153658	0.516065	protein_coding	Hsp83
FBgn0035083	0.420909	0.00232852	0.0398334	protein_coding	Tina-1
FBgn0264672	0.420689	0.0278376	0.209906	protein_coding	Eogt
FBgn0052695	0.420198	0.0668902	0.343258	protein_coding	CG32695
FBgn0034580	0.420131	0.13542	0.487613	protein_coding	Cht8
FBgn0034588	0.419637	0.00824182	0.0985641	protein_coding	CG9394
FBgn0053774	0.418847	0.0363615	0.24395	protein_coding	CG33774
FBgn0261286	0.418566	0.0827987	0.382672	protein_coding	Mat89Ba
FBgn0003187	0.41824	0.112891	0.445904	protein_coding	qua
FBgn0012036	0.418057	0.00922968	0.105887	protein_coding	Aldh
FBgn0010038	0.417827	0.17639	0.550361	protein_coding	GstD2
FBgn0085317	0.417577	0.00693335	0.0871336	protein_coding	CG34288
FBgn0038968	0.417569	0.0262819	0.203403	protein_coding	CG12499
FBgn0040383	0.417092	0.0322207	0.229289	protein_coding	CG5254
FBgn0051866	0.416816	0.0258389	0.201799	protein_coding	Ada1-2
FBgn0027343	0.41672	0.0404024	0.259829	protein_coding	fz3
FBgn0015025	0.415594	0.104169	0.428003	protein_coding	CkIIalpha-i1
FBgn0011834	0.415334	0.153552	0.51599	protein_coding	Ser6
FBgn0039690	0.415272	0.0108284	0.118705	protein_coding	Gnpnat
FBgn0266404	0.413603	0.0859586	0.390242	ncRNA	asRNA:CR45044
FBgn0032382	0.413478	0.0787874	0.373686	protein_coding	Mal-B2
FBgn0030757	0.413249	0.129476	0.475835	protein_coding	CG9902
FBgn0263747	0.411849	0.0710013	0.355339	protein_coding	CG43672
FBgn0035770	0.411364	0.00881147	0.102435	protein_coding	pst
FBgn0036754	0.4112	0.09853	0.414741	protein_coding	CG5589
FBgn0051259	0.410651	0.0832046	0.383782	protein_coding	CG31259
FBgn0038721	0.410472	0.0307861	0.222439	protein_coding	subdued
FBgn0040382	0.410269	0.0570485	0.312515	protein_coding	CG5273
FBgn0029831	0.41011	0.00442386	0.0636691	protein_coding	CG5966
FBgn0265042	0.409692	0.0537064	0.302126	protein_coding	Irk1
FBgn0033744	0.409629	0.00489126	0.0687396	protein_coding	Dh44-R2
FBgn0037687	0.409215	0.00104409	0.022356	protein_coding	CG8132
FBgn0032822	0.409125	0.051154	0.296387	protein_coding	CG10466
FBgn0037186	0.408864	0.0967405	0.411635	protein_coding	CG11241
FBgn0020414	0.40866	0.0290697	0.215645	protein_coding	Idgf3
FBgn0034902	0.40843	0.000411216	0.0109211	protein_coding	CG5532
FBgn0267913	0.407994	0.0465823	0.280077	ncRNA	lncRNA:CR46194
FBgn0051183	0.407892	0.0201965	0.17352	protein_coding	CG31183
FBgn0032010	0.407393	0.0863946	0.390502	protein_coding	CG8086
FBgn0015576	0.406902	0.0247557	0.19751	protein_coding	alpha-Est8
FBgn0002023	0.406654	0.0800883	0.376579	protein_coding	Lim3
FBgn0266284	0.406352	0.0352147	0.240426	protein_coding	Ns3
FBgn0010226	0.406039	0.0858009	0.390019	protein_coding	GstS1
FBgn0037290	0.405772	0.147947	0.507623	protein_coding	CG1124
FBgn0266813	0.40554	0.11183	0.444289	ncRNA	asRNA:CR45275
FBgn0033615	0.405094	0.0332791	0.233366	protein_coding	CG7741
FBgn0024194	0.404224	0.00571954	0.076508	protein_coding	rasp
FBgn0031189	0.404198	0.0545549	0.304053	protein_coding	CG14618
FBgn0053306	0.403927	0.0537469	0.302177	protein_coding	CG33306
FBgn0263112	0.403467	0.00121091	0.0245087	protein_coding	Mitf
FBgn0030824	0.40341	0.0363466	0.24395	protein_coding	CG5070
FBgn0028955	0.403344	0.00247068	0.0416069	protein_coding	CG8788
FBgn0033785	0.40281	0.0849035	0.387221	protein_coding	Sans
FBgn0086909	0.402267	0.0313574	0.225314	protein_coding	CG31751
FBgn0259238	0.402086	0.00506892	0.0707369	protein_coding	CG42336
FBgn0038756	0.4018	0.0190273	0.166601	protein_coding	CG4783
FBgn0026592	0.401007	0.0744858	0.36406	protein_coding	Fie
FBgn0040323	0.40098	0.077818	0.372686	protein_coding	GNBP1
FBgn0013685	0.400701	0.0564971	0.310556	protein_coding	mt:ND6
FBgn0259111	0.400692	0.00438948	0.063555	protein_coding	Ndae1
FBgn0039081	0.399557	0.0267	0.20552	protein_coding	Irk2
FBgn0032478	0.398311	0.14107	0.497909	protein_coding	Rsph1
FBgn0260458	0.398094	0.082669	0.38244	protein_coding	PGRP-LD
FBgn0003892	0.397792	0.0110349	0.120556	protein_coding	ptc
FBgn0035588	0.397715	0.0246387	0.197243	protein_coding	CG10672
FBgn0034501	0.397684	0.0622539	0.32764	protein_coding	CG13868
FBgn0030794	0.396746	0.150951	0.512409	protein_coding	CG13005
FBgn0040340	0.396651	0.00648143	0.0830833	protein_coding	TRAM
FBgn0038429	0.396398	0.143553	0.501796	protein_coding	CG14882
FBgn0051975	0.395798	0.0364768	0.244382	protein_coding	CG31975
FBgn0010548	0.395184	0.0512516	0.296649	protein_coding	Aldh-III
FBgn0058469	0.394933	0.143926	0.501936	ncRNA	lncRNA:CR40469
FBgn0037338	0.394777	0.0661721	0.342027	protein_coding	Snm1
FBgn0037440	0.394607	0.0140397	0.136894	protein_coding	CRAT
FBgn0031735	0.394265	0.146229	0.505699	protein_coding	CG11029
FBgn0040805	0.394042	0.0900089	0.399064	protein_coding	CG12355
FBgn0037620	0.393574	0.0754527	0.36655	protein_coding	ranshi
FBgn0085481	0.39318	0.11353	0.447511	protein_coding	CG34452
FBgn0031937	0.392969	0.0831351	0.383707	protein_coding	CG13795
FBgn0039296	0.392237	0.0939785	0.406661	protein_coding	Sil1
FBgn0038221	0.391917	0.0683673	0.348137	protein_coding	IFT54
FBgn0036514	0.391691	0.0506478	0.295287	protein_coding	CG12301
FBgn0032770	0.391597	0.00688168	0.0868248	protein_coding	CG13086
FBgn0037236	0.391015	0.082276	0.381758	protein_coding	Skp2
FBgn0259236	0.390398	0.0419116	0.265091	protein_coding	comm3
FBgn0003366	0.390397	0.118099	0.454342	protein_coding	sev
FBgn0038490	0.390335	0.169277	0.542476	protein_coding	CG5285
FBgn0036816	0.390273	0.0582145	0.316518	protein_coding	Indy
FBgn0051719	0.39003	0.0363509	0.24395	protein_coding	RluA-1
FBgn0034628	0.390026	0.073778	0.361828	protein_coding	Acox57D-p
FBgn0033518	0.389989	0.107525	0.434163	protein_coding	Prx2540-2
FBgn0036964	0.389669	0.0355064	0.241927	protein_coding	FRG1
FBgn0050338	0.389665	0.0718497	0.357538	protein_coding	CG30338
FBgn0030720	0.389461	0.0736248	0.361322	protein_coding	CG8939
FBgn0259993	0.388959	0.0977386	0.412726	ncRNA	lncRNA:CR42491
FBgn0086912	0.388904	0.0795606	0.375317	protein_coding	mbm
FBgn0051864	0.388103	0.0380763	0.25073	protein_coding	Qtzl
FBgn0003411	0.388027	0.141778	0.498193	protein_coding	sisA
FBgn0032230	0.387692	0.0750875	0.365514	protein_coding	lft
FBgn0260965	0.387228	0.009219	0.105887	protein_coding	CG42588
FBgn0037619	0.386982	0.0704905	0.353703	protein_coding	CG8159
FBgn0031738	0.386728	0.0139057	0.136278	protein_coding	CG9171
FBgn0263974	0.386699	0.201613	0.584435	protein_coding	qin
FBgn0030662	0.386345	0.0112717	0.122427	protein_coding	CG9220
FBgn0037698	0.386014	0.14772	0.507623	protein_coding	CG16779
FBgn0051974	0.385573	0.0237163	0.192102	protein_coding	CG31974
FBgn0027330	0.385527	0.117074	0.452415	protein_coding	l(1)G0020
FBgn0085428	0.385469	0.0763721	0.369238	protein_coding	Nox
FBgn0038380	0.384968	0.0851826	0.388126	protein_coding	CG14877
FBgn0026147	0.38469	0.0867832	0.391781	protein_coding	TTLL4A
FBgn0001320	0.38463	0.0942815	0.407381	protein_coding	kni
FBgn0035166	0.384456	0.0164213	0.152241	protein_coding	JMJD5
FBgn0039877	0.384448	0.00248864	0.0417553	protein_coding	Mccc1
FBgn0003091	0.383961	0.0545904	0.304074	protein_coding	Pkc53E
FBgn0266700	0.383579	0.157832	0.521802	ncRNA	asRNA:CR45190
FBgn0266742	0.383571	0.0283435	0.212217	ncRNA	lncRNA:CR45215
FBgn0038095	0.383336	0.210885	0.594909	protein_coding	Cyp304a1
FBgn0261108	0.383318	0.0513422	0.296994	protein_coding	Atg13
FBgn0041712	0.382732	0.153364	0.51554	protein_coding	yellow-d
FBgn0050005	0.382623	0.0136181	0.134557	protein_coding	GstT2
FBgn0036323	0.382584	0.147402	0.507203	protein_coding	CG14118
FBgn0033321	0.381732	0.0767584	0.369902	protein_coding	CG8738
FBgn0029663	0.381656	0.173098	0.547263	protein_coding	CG10804
FBgn0031127	0.381134	0.147303	0.507203	protein_coding	CG1835
FBgn0027590	0.380941	0.00244551	0.0414677	protein_coding	GstE12
FBgn0016080	0.380553	0.151202	0.512573	NA	NA
FBgn0051098	0.380011	0.00687368	0.0868248	protein_coding	CG31098
FBgn0031835	0.379719	0.0933965	0.405589	protein_coding	CG11319
FBgn0031610	0.379656	0.18638	0.562809	protein_coding	CG15436
FBgn0262599	0.379272	0.126351	0.471012	protein_coding	SmydA-3
FBgn0030073	0.37901	0.0167582	0.154408	protein_coding	CG10962
FBgn0037749	0.378867	0.0114193	0.122812	protein_coding	CG9471
FBgn0037076	0.378503	0.0440286	0.272038	protein_coding	ebd2
FBgn0021764	0.378334	0.0247297	0.197468	protein_coding	sdk
FBgn0000406	0.378306	0.10114	0.421301	protein_coding	Cyt-b5-r
FBgn0035538	0.377828	0.0139728	0.136476	protein_coding	DopEcR
FBgn0039291	0.376879	0.0303948	0.220374	protein_coding	CG13663
FBgn0267717	0.37596	0.170314	0.543616	ncRNA	asRNA:CR46050
FBgn0034493	0.37565	0.0799641	0.376579	protein_coding	CG8908
FBgn0031417	0.375579	0.139281	0.49466	protein_coding	CG3597
FBgn0062412	0.375554	0.0927869	0.404913	protein_coding	Ctr1B
FBgn0032728	0.375008	0.00747367	0.0923546	protein_coding	Tango6
FBgn0025637	0.374994	0.00114298	0.0235302	protein_coding	SkpA
FBgn0261681	0.374888	0.225555	0.607759	protein_coding	CG42728
FBgn0260857	0.374661	0.00585262	0.0775484	protein_coding	Bet1
FBgn0037635	0.374659	0.115788	0.450682	protein_coding	CG9837
FBgn0037354	0.374518	0.0976742	0.412726	protein_coding	CG12171
FBgn0039298	0.373275	0.163257	0.531151	protein_coding	to
FBgn0000392	0.372476	0.0496234	0.290969	protein_coding	cup
FBgn0034997	0.372266	0.211105	0.595311	protein_coding	CG3376
FBgn0085427	0.372015	0.0727484	0.359037	protein_coding	CG34398
FBgn0028670	0.371996	0.0160159	0.149347	protein_coding	Vha100-2
FBgn0004629	0.371793	0.0153026	0.145085	protein_coding	Cys
FBgn0032733	0.371539	0.045797	0.277962	protein_coding	CG15170
FBgn0036272	0.371531	0.00204493	0.0362062	protein_coding	Sms
FBgn0010041	0.371418	0.0765575	0.369676	protein_coding	GstD5
FBgn0035679	0.371382	0.0213433	0.179995	protein_coding	CG10467
FBgn0037195	0.37124	0.198744	0.581302	protein_coding	CG11226
FBgn0001098	0.370577	0.0363966	0.244015	protein_coding	Gdh
FBgn0030367	0.370508	0.0516844	0.297806	protein_coding	Cyp311a1
FBgn0267697	0.370425	0.146028	0.505699	ncRNA	asRNA:CR46033
FBgn0034639	0.37038	0.0346332	0.239198	protein_coding	CG15673
FBgn0034249	0.37002	0.101853	0.423536	protein_coding	RhoGAP54D
FBgn0034405	0.369987	0.0556033	0.307578	protein_coding	Jheh2
FBgn0263397	0.369876	0.0819145	0.381116	protein_coding	Ih
FBgn0034706	0.369815	0.0883812	0.39484	protein_coding	CG11275
FBgn0030160	0.369558	0.0935585	0.406082	protein_coding	CG9691
FBgn0034248	0.368491	0.0451252	0.275625	protein_coding	CG14483
FBgn0037044	0.367687	0.0104577	0.115564	protein_coding	Pdss2
FBgn0086253	0.367627	0.173832	0.547942	protein_coding	rumi
FBgn0000317	0.36741	0.0422957	0.265791	protein_coding	ck
FBgn0035337	0.36662	0.156772	0.520086	protein_coding	CG15877
FBgn0265575	0.366431	0.0282112	0.212105	protein_coding	yin
FBgn0029095	0.365906	0.0346655	0.239249	protein_coding	aru
FBgn0037534	0.365724	0.0396956	0.256647	protein_coding	ELOVL
FBgn0042101	0.365568	0.0886468	0.395177	protein_coding	CG18744
FBgn0039537	0.365193	0.0288753	0.2147	protein_coding	CG5590
FBgn0039942	0.364425	0.029814	0.218136	protein_coding	CG17163
FBgn0259730	0.364203	0.184692	0.561552	protein_coding	tal-1A
FBgn0259731	0.364203	0.184692	0.561552	protein_coding	tal-2A
FBgn0259732	0.364203	0.184692	0.561552	protein_coding	tal-3A
FBgn0259733	0.364203	0.184692	0.561552	protein_coding	tal-AA
FBgn0037818	0.364157	0.129686	0.476059	protein_coding	CG6465
FBgn0261260	0.363973	0.0162462	0.151131	protein_coding	mgl
FBgn0003082	0.363684	0.0052247	0.0721689	protein_coding	phr
FBgn0001341	0.363528	0.107945	0.434948	protein_coding	Mybbp1A
FBgn0020307	0.363165	0.0233671	0.190544	protein_coding	dve
FBgn0034430	0.362873	0.072907	0.359125	protein_coding	mip40
FBgn0039182	0.361571	0.0685749	0.348717	protein_coding	CG5728
FBgn0037533	0.361477	0.0143081	0.139229	protein_coding	CD98hc
FBgn0036756	0.360946	0.0437161	0.271157	protein_coding	Cln3
FBgn0031834	0.360823	0.0276441	0.209116	protein_coding	CG13766
FBgn0031710	0.360739	0.0235003	0.191143	protein_coding	Vps52
FBgn0015781	0.360586	0.0453082	0.276236	protein_coding	P5cr
FBgn0052082	0.360173	0.0733161	0.360492	protein_coding	IRSp53
FBgn0264895	0.360064	0.00644485	0.0828966	protein_coding	RapGAP1
FBgn0036806	0.359261	0.0992538	0.416511	protein_coding	Cyp12c1
FBgn0032350	0.35926	0.0325316	0.230591	protein_coding	CG6287
FBgn0035612	0.359175	0.31721	0.699302	protein_coding	frm
FBgn0032620	0.359098	0.222489	0.60485	protein_coding	CG12288
FBgn0036714	0.359045	0.0422158	0.265791	protein_coding	CG7692
FBgn0039864	0.358875	0.204288	0.586703	protein_coding	CG11550
FBgn0027562	0.358819	0.200043	0.582438	protein_coding	CG10345
FBgn0031560	0.358116	0.532623	0.843945	protein_coding	CG16713
FBgn0035923	0.358056	0.0294235	0.217097	protein_coding	CG6511
FBgn0001179	0.358009	0.0329133	0.231571	protein_coding	hay
FBgn0039107	0.357935	0.0544247	0.303999	protein_coding	CG10300
FBgn0003462	0.357829	0.0145595	0.140537	protein_coding	Sod1
FBgn0040259	0.357717	0.0754474	0.36655	protein_coding	Ugt302C1
FBgn0010238	0.357669	0.0657919	0.341167	protein_coding	Lac
FBgn0250816	0.357573	0.192463	0.573037	protein_coding	AGO3
FBgn0030305	0.357217	0.0291048	0.215739	protein_coding	Uba5
FBgn0037150	0.356861	0.0326412	0.230914	protein_coding	CG7133
FBgn0011207	0.356711	0.027533	0.208681	protein_coding	pelo
FBgn0035169	0.35626	0.0557239	0.30789	protein_coding	Dci
FBgn0051029	0.35599	0.130413	0.477423	protein_coding	CG31029
FBgn0036191	0.355938	0.0164081	0.152241	protein_coding	Sugb
FBgn0000536	0.355773	0.0251466	0.199636	protein_coding	eas
FBgn0267545	0.355688	0.119336	0.457273	ncRNA	asRNA:CR45885
FBgn0003463	0.355167	0.0359845	0.242856	protein_coding	sog
FBgn0000557	0.355161	0.213932	0.597196	protein_coding	eEF1alpha2
FBgn0036454	0.355045	0.0611407	0.324576	protein_coding	CG17839
FBgn0040360	0.354742	0.224773	0.607183	protein_coding	CG14626
FBgn0053230	0.354589	0.0165949	0.153407	protein_coding	CG33230
FBgn0020506	0.354052	0.029317	0.216977	protein_coding	Amyrel
FBgn0004646	0.353984	0.0351071	0.240399	protein_coding	ogre
FBgn0263005	0.353866	0.0484154	0.28697	protein_coding	CG43313
FBgn0051956	0.353734	0.0277911	0.20972	protein_coding	Pgant4
FBgn0283659	0.353524	0.0915261	0.402899	protein_coding	THG
FBgn0030968	0.353243	0.0711084	0.355505	protein_coding	CG7322
FBgn0034439	0.352432	0.0533254	0.301571	protein_coding	CG10062
FBgn0035204	0.352101	0.00593839	0.0783151	protein_coding	CG2277
FBgn0029813	0.352083	0.0999151	0.418373	protein_coding	AgmNAT
FBgn0039013	0.351232	0.0907041	0.400564	protein_coding	CG4813
FBgn0035194	0.350923	0.104906	0.429541	protein_coding	Psf1
FBgn0036449	0.350582	0.216921	0.600795	protein_coding	bmm
FBgn0054039	0.350397	0.0885736	0.395149	protein_coding	CG34039
FBgn0261842	0.350105	0.0421819	0.265791	protein_coding	pre-mod(mdg4)-AE
FBgn0053199	0.350028	0.0266946	0.20552	protein_coding	CG33199
FBgn0037669	0.349862	0.129412	0.475835	protein_coding	Ibf2
FBgn0027602	0.349749	0.127654	0.473665	protein_coding	CG8611
FBgn0031895	0.34942	0.121188	0.460152	protein_coding	CG4497
FBgn0004911	0.349353	0.251748	0.636489	ncRNA	asRNA:Eig63F-2
FBgn0051673	0.349243	0.0168514	0.154884	protein_coding	CG31673
FBgn0051548	0.349223	0.0271935	0.207162	protein_coding	CG31548
FBgn0038302	0.348924	0.048673	0.287752	protein_coding	CG4210
FBgn0010470	0.348773	0.00871448	0.101553	protein_coding	Fkbp14
FBgn0032025	0.348646	0.0296659	0.218049	protein_coding	CG7778
FBgn0051759	0.348611	0.0909401	0.40087	protein_coding	CG31759
FBgn0033115	0.348076	0.202262	0.584827	protein_coding	Spn42De
FBgn0034429	0.348064	0.187103	0.564068	protein_coding	AANATL4
FBgn0041194	0.347643	0.572229	0.861479	protein_coding	Prat2
FBgn0028480	0.347619	0.00718455	0.0893561	protein_coding	CG17841
FBgn0028527	0.347475	0.100201	0.419203	protein_coding	CG18507
FBgn0047135	0.34746	0.00382811	0.0575053	protein_coding	CG32276
FBgn0050049	0.347336	0.103006	0.425571	protein_coding	CG30049
FBgn0011205	0.347275	0.016611	0.153409	protein_coding	fbl
FBgn0034335	0.346831	0.0889611	0.395959	protein_coding	GstE1
FBgn0262631	0.346719	0.179917	0.554815	ncRNA	lncRNA:CR43148
FBgn0039471	0.346424	0.0378039	0.24962	protein_coding	CG6295
FBgn0266405	0.346389	0.321225	0.703155	protein_coding	CG45045
FBgn0052687	0.345985	0.00628388	0.0813099	protein_coding	CG32687
FBgn0037251	0.34592	0.158678	0.523517	protein_coding	CG9804
FBgn0034959	0.345844	0.0355432	0.242006	protein_coding	Xxylt
FBgn0262689	0.345785	0.204724	0.587311	ncRNA	asRNA:CR43159
FBgn0037561	0.345605	0.131256	0.478534	protein_coding	CG9630
FBgn0035149	0.345451	0.0693591	0.350588	protein_coding	MED30
FBgn0033195	0.344957	0.0970541	0.411719	protein_coding	CG1360
FBgn0263916	0.344641	0.0043196	0.0627321	protein_coding	Ent2
FBgn0267241	0.344542	0.232283	0.617409	ncRNA	lncRNA:CR45681
FBgn0036766	0.344371	0.0377322	0.249489	protein_coding	CG5506
FBgn0039430	0.344273	0.0833714	0.383782	protein_coding	CG5455
FBgn0037521	0.343988	0.177095	0.55118	protein_coding	CG2993
FBgn0030485	0.342862	0.164151	0.532785	protein_coding	CG1998
FBgn0033942	0.34269	0.0953356	0.409007	protein_coding	Cpr51A
FBgn0000003	0.34233	0.208296	0.591771	ncRNA	7SLRNA:CR32864
FBgn0261504	0.34233	0.208296	0.591771	ncRNA	7SLRNA:CR42652
FBgn0020385	0.341928	0.0583717	0.316518	protein_coding	pug
FBgn0037709	0.341583	0.00829201	0.0987848	protein_coding	CG8199
FBgn0036254	0.341201	0.0994675	0.417225	protein_coding	CG5645
FBgn0259163	0.341181	0.0242048	0.194407	protein_coding	CG42268
FBgn0262560	0.340722	0.158478	0.523397	protein_coding	wcd
FBgn0035957	0.340596	0.164614	0.533401	protein_coding	CG5144
FBgn0003390	0.340457	0.143487	0.501796	protein_coding	shf
FBgn0026563	0.340444	0.0803705	0.377471	protein_coding	CG1979
FBgn0034142	0.339734	0.0791875	0.374292	protein_coding	CG8306
FBgn0036023	0.33969	0.591398	0.872103	protein_coding	CG18179
FBgn0267601	0.339647	0.161261	0.527514	ncRNA	lncRNA:CR45939
FBgn0041147	0.33919	0.15395	0.516065	protein_coding	ida
FBgn0030724	0.338845	0.0177996	0.159632	protein_coding	Nipsnap
FBgn0037250	0.338429	0.0507496	0.295343	protein_coding	CG1074
FBgn0011204	0.338339	0.00866139	0.101057	protein_coding	cue
FBgn0037371	0.338304	0.0110044	0.12036	protein_coding	Sym
FBgn0032787	0.337711	0.0257466	0.201734	protein_coding	CG10195
FBgn0032858	0.337125	0.0749333	0.365319	protein_coding	CG10949
FBgn0261984	0.337009	0.00666262	0.0850656	protein_coding	Ire1
FBgn0023522	0.336878	0.0288022	0.214322	protein_coding	CG11596
FBgn0266457	0.336864	0.229293	0.612851	ncRNA	lncRNA:CR45082
FBgn0035911	0.336654	0.0265524	0.204751	protein_coding	CG6638
FBgn0083956	0.33661	0.0478685	0.284692	protein_coding	CG34120
FBgn0034543	0.336473	0.0103769	0.114966	protein_coding	galla-1
FBgn0037010	0.336208	0.0819488	0.381116	NA	NA
FBgn0031361	0.336072	0.109981	0.439963	protein_coding	CG17652
FBgn0014903	0.33569	0.0360006	0.242856	protein_coding	CG14630
FBgn0031289	0.33546	0.122912	0.463949	protein_coding	CG13950
FBgn0265052	0.335321	0.099818	0.418148	protein_coding	St3
FBgn0259936	0.335085	0.218602	0.602016	ncRNA	Uhg3
FBgn0264078	0.335062	0.116818	0.452415	protein_coding	Flo2
FBgn0053505	0.334842	0.162895	0.530331	protein_coding	U3-55K
FBgn0033983	0.33477	0.203133	0.585582	protein_coding	ADPS
FBgn0040763	0.334715	0.173157	0.547263	protein_coding	CG18336
FBgn0063497	0.334434	0.151618	0.512951	protein_coding	GstE3
FBgn0030081	0.334194	0.198925	0.581302	protein_coding	CG7246
FBgn0033446	0.334116	0.0229532	0.189041	protein_coding	CG1648
FBgn0051116	0.334022	0.0317637	0.226708	protein_coding	ClC-a
FBgn0030884	0.333925	0.0919272	0.403024	protein_coding	CG6847
FBgn0027091	0.333906	0.0117676	0.124665	protein_coding	CysRS
FBgn0030600	0.33356	0.0121032	0.126361	protein_coding	hiw
FBgn0262107	0.3335	0.204002	0.586703	ncRNA	asRNA:CR42860
FBgn0037105	0.333496	0.0284712	0.212682	protein_coding	S1P
FBgn0010223	0.332795	0.0282175	0.212105	protein_coding	Galphaf
FBgn0033297	0.332251	0.12521	0.468029	protein_coding	Mal-A8
FBgn0000357	0.332151	0.246988	0.632463	protein_coding	Cp18
FBgn0029756	0.331944	0.167219	0.538574	protein_coding	CG3309
FBgn0262057	0.331503	0.12792	0.473738	protein_coding	Spn77Ba
FBgn0010651	0.331486	0.28094	0.667232	protein_coding	MFS14
FBgn0261341	0.331368	0.196303	0.577487	protein_coding	verm
FBgn0038261	0.331162	0.204044	0.586703	protein_coding	CG14856
FBgn0031948	0.331078	0.0429421	0.267995	protein_coding	CG7149
FBgn0266312	0.331039	0.23661	0.622126	ncRNA	lncRNA:CR44977
FBgn0011672	0.330907	0.037075	0.246237	protein_coding	Mvl
FBgn0035623	0.330891	0.919412	0.978387	protein_coding	mthl2
FBgn0028424	0.330685	0.0336879	0.235314	protein_coding	JhI-26
FBgn0031268	0.330457	0.128801	0.475719	protein_coding	cold
FBgn0039900	0.33028	0.199542	0.582038	protein_coding	Syt7
FBgn0002174	0.330237	0.00625971	0.0812158	protein_coding	CG5504
FBgn0001285	0.330204	0.198399	0.581174	protein_coding	Jon44E
FBgn0032479	0.330064	0.0316683	0.226703	protein_coding	CG16974
FBgn0030615	0.329881	0.137915	0.492538	protein_coding	Cyp4s3
FBgn0032456	0.329756	0.067074	0.343258	protein_coding	MRP
FBgn0051269	0.329449	0.16044	0.526095	protein_coding	CG31269
FBgn0051713	0.329431	0.087221	0.392098	protein_coding	Apf
FBgn0037848	0.329388	0.0540292	0.303115	protein_coding	Tsp86D
FBgn0050340	0.329377	0.138422	0.493618	protein_coding	CG30340
FBgn0031258	0.329325	0.0372778	0.246994	protein_coding	CG4297
FBgn0037166	0.329113	0.0970395	0.411719	protein_coding	CG11426
FBgn0000442	0.328874	0.0724162	0.358876	protein_coding	Pkg21D
FBgn0016013	0.328067	0.155637	0.519185	protein_coding	Faa
FBgn0015623	0.327868	0.0463553	0.279399	protein_coding	Cpr
FBgn0031973	0.327573	0.176263	0.550361	protein_coding	Spn28Dc
FBgn0038588	0.327518	0.148296	0.507916	protein_coding	CG7156
FBgn0032144	0.327448	0.0968075	0.411635	protein_coding	CG17633
FBgn0000533	0.327289	0.117647	0.453511	protein_coding	ea
FBgn0043792	0.327104	0.178137	0.552276	protein_coding	CG30427
FBgn0267828	0.326754	0.00698389	0.0876542	protein_coding	Fatp1
FBgn0042125	0.326525	0.118477	0.455434	protein_coding	CG18787
FBgn0014395	0.326177	0.105975	0.431712	protein_coding	tilB
FBgn0032450	0.3258	0.151259	0.512586	protein_coding	CG5776
FBgn0023076	0.325716	0.066882	0.343258	protein_coding	Clk
FBgn0032945	0.325704	0.110005	0.439963	protein_coding	CG8665
FBgn0050488	0.325612	0.150401	0.512062	protein_coding	antr
FBgn0032150	0.325607	0.226971	0.6101	protein_coding	CG13123
FBgn0039117	0.325458	0.0601369	0.321279	protein_coding	tst
FBgn0039723	0.325288	0.234963	0.620624	protein_coding	CG15522
FBgn0034908	0.325253	0.0616476	0.326157	protein_coding	CG5543
FBgn0266452	0.325164	0.0882127	0.394377	protein_coding	CTPsyn
FBgn0036018	0.325055	0.144632	0.502448	protein_coding	CG3335
FBgn0032256	0.325034	0.136124	0.489342	protein_coding	RluA-2
FBgn0052104	0.324747	0.129161	0.475835	protein_coding	CG32104
FBgn0283503	0.324389	0.0542756	0.303729	protein_coding	Neurl4
FBgn0262801	0.324268	0.00921928	0.105887	protein_coding	twr
FBgn0027580	0.324014	0.0781833	0.372718	protein_coding	PCB
FBgn0053493	0.323934	0.245959	0.631923	protein_coding	CG33493
FBgn0031533	0.323417	0.129178	0.475835	protein_coding	CG2772
FBgn0032666	0.323139	0.179637	0.554763	protein_coding	CG5758
FBgn0261611	0.323059	0.154883	0.51757	protein_coding	CG42700
FBgn0037627	0.322746	0.213411	0.596895	protein_coding	CG13318
FBgn0037942	0.322548	0.184095	0.561335	protein_coding	CG14721
FBgn0033519	0.322519	0.147504	0.5073	protein_coding	CG11825
FBgn0040009	0.322148	0.0600012	0.32083	protein_coding	CG17490
FBgn0083952	0.32197	0.217432	0.600835	protein_coding	CG34116
FBgn0036752	0.321579	0.038353	0.25188	protein_coding	Adgf-A
FBgn0033936	0.321562	0.193056	0.573805	protein_coding	Achl
FBgn0264605	0.321461	0.0591751	0.319074	protein_coding	CG43954
FBgn0000116	0.321348	0.0597286	0.32076	protein_coding	Argk
FBgn0025592	0.321296	0.0306666	0.221843	protein_coding	Gk1
FBgn0031117	0.321054	0.071209	0.355823	protein_coding	GstT3
FBgn0063495	0.320805	0.0417993	0.264903	protein_coding	GstE5
FBgn0033635	0.320769	0.0243235	0.195034	protein_coding	Prip
FBgn0262738	0.320036	0.0184379	0.162625	protein_coding	norpA
FBgn0029863	0.319813	0.21586	0.599792	protein_coding	CG3823
FBgn0024330	0.319803	0.0907912	0.400765	protein_coding	MED6
FBgn0004811	0.319677	0.0508294	0.29545	protein_coding	fs(2)ltoPP43
FBgn0259742	0.319372	0.0929866	0.404913	protein_coding	CG42360
FBgn0034814	0.319346	0.0675413	0.344844	protein_coding	CG9890
FBgn0030398	0.318863	0.263927	0.650321	protein_coding	Cpr11B
FBgn0050285	0.318833	0.350286	0.726924	protein_coding	CG30285
FBgn0038704	0.318802	0.0879709	0.39429	protein_coding	CG5316
FBgn0036727	0.317967	0.152561	0.514097	protein_coding	SecCl
FBgn0014930	0.317594	0.0358779	0.242856	protein_coding	CG2846
FBgn0263705	0.317582	0.115979	0.450877	protein_coding	Myo10A
FBgn0029603	0.317568	0.242758	0.628399	protein_coding	CG14053
FBgn0035998	0.317532	0.0951041	0.408731	protein_coding	CG3437
FBgn0033875	0.317409	0.0659004	0.34124	protein_coding	CG6357
FBgn0003141	0.316731	0.0395218	0.256212	protein_coding	pr
FBgn0267652	0.316724	0.263936	0.650321	protein_coding	pre-mod(mdg4)-N
FBgn0028327	0.316701	0.0182767	0.161972	protein_coding	l(1)G0320
FBgn0034528	0.3167	0.10788	0.434934	protein_coding	CG11180
FBgn0031418	0.316663	0.25386	0.639573	protein_coding	CG3609
FBgn0000543	0.316656	0.0872029	0.392098	protein_coding	ecd
FBgn0010520	0.316258	0.161051	0.527008	protein_coding	Bka
FBgn0030855	0.316225	0.0959251	0.409732	protein_coding	CG5800
FBgn0027608	0.315782	0.250984	0.636291	protein_coding	CG2082
FBgn0263050	0.315167	0.176489	0.550361	protein_coding	CG43345
FBgn0020909	0.315081	0.144471	0.502362	protein_coding	Rtc1
FBgn0030291	0.315067	0.196857	0.578419	protein_coding	CG1738
FBgn0036024	0.314988	0.284965	0.670213	protein_coding	CG18180
FBgn0011297	0.314682	0.0100787	0.113174	protein_coding	Alg3
FBgn0037439	0.314612	0.129151	0.475835	protein_coding	CG10286
FBgn0036959	0.314377	0.100728	0.420679	protein_coding	CG6951
FBgn0037021	0.314108	0.112466	0.44569	protein_coding	CG11399
FBgn0266581	0.313808	0.181375	0.557107	protein_coding	pit
FBgn0030271	0.313549	0.43083	0.787738	protein_coding	CG15202
FBgn0085813	0.313548	0.0440786	0.27209	pseudogene	18SrRNA-Psi:CR41602
FBgn0037720	0.313496	0.0622332	0.32764	protein_coding	CG8312
FBgn0004463	0.313424	0.0795281	0.375317	protein_coding	RpIII128
FBgn0039156	0.313284	0.0805542	0.377964	protein_coding	CG6178
FBgn0032721	0.313225	0.00174763	0.0318818	protein_coding	CG10602
FBgn0262035	0.312335	0.229778	0.613465	protein_coding	CG42846
FBgn0038135	0.312181	0.0633401	0.332397	protein_coding	CG8773
FBgn0030343	0.312003	0.00338979	0.0524789	protein_coding	ATP7
FBgn0028945	0.311939	0.287344	0.672604	protein_coding	CG7631
FBgn0033735	0.311824	0.0832786	0.383782	protein_coding	Dera
FBgn0067903	0.311777	0.0525577	0.300992	protein_coding	IM18
FBgn0001125	0.311684	0.152462	0.513946	protein_coding	Got2
FBgn0034915	0.311582	0.134675	0.48584	protein_coding	eIF6
FBgn0032791	0.311466	0.123572	0.465594	protein_coding	CG18094
FBgn0033468	0.311416	0.1521	0.513446	protein_coding	CG1418
FBgn0036836	0.311266	0.303845	0.685399	protein_coding	CG11619
FBgn0262886	0.311248	0.0529555	0.301571	ncRNA	lncRNA:CR43241
FBgn0051414	0.310914	0.219419	0.603036	protein_coding	Gba1b
FBgn0025454	0.310543	0.191602	0.571511	protein_coding	Cyp6g1
FBgn0054045	0.31049	0.263356	0.649872	protein_coding	CG34045
FBgn0035313	0.310217	0.129805	0.476316	protein_coding	CG13810
FBgn0039774	0.310184	0.0796873	0.375546	protein_coding	CDase
FBgn0031320	0.310066	0.171346	0.54489	protein_coding	CG5126
FBgn0022029	0.309586	0.0842403	0.385673	protein_coding	l(2)k01209
FBgn0034933	0.309411	0.106559	0.432992	protein_coding	CG3735
FBgn0039647	0.309311	0.0719219	0.357599	protein_coding	jus
FBgn0034734	0.309285	0.150875	0.512409	protein_coding	CG4554
FBgn0033775	0.309245	0.011621	0.123862	protein_coding	Cyp9h1
FBgn0033086	0.308949	0.0648714	0.337901	protein_coding	CG9410
FBgn0061361	0.308745	0.144323	0.502178	protein_coding	CG33786
FBgn0061362	0.308745	0.144323	0.502178	protein_coding	CG33785
FBgn0011481	0.308692	0.0123885	0.128205	protein_coding	Ssdp
FBgn0035025	0.308095	0.0578625	0.315179	protein_coding	uri
FBgn0035103	0.308008	0.165277	0.534131	protein_coding	Vdup1
FBgn0037646	0.307879	0.168919	0.541511	protein_coding	CAHbeta
FBgn0028746	0.307775	0.0338599	0.235871	protein_coding	CG18508
FBgn0034496	0.307629	0.155744	0.51919	protein_coding	CG9143
FBgn0030481	0.307461	0.0630748	0.331367	protein_coding	CG1662
FBgn0262608	0.307381	0.273353	0.658702	protein_coding	CG43134
FBgn0033274	0.306965	0.188446	0.56617	protein_coding	CG14757
FBgn0038076	0.306519	0.175187	0.549491	protein_coding	Cyp313a4
FBgn0266166	0.306198	0.109954	0.439963	ncRNA	asRNA:CR44872
FBgn0038256	0.306126	0.174919	0.549233	protein_coding	CG7530
FBgn0052483	0.306055	0.133131	0.483171	protein_coding	CG32483
FBgn0039326	0.306016	0.042564	0.26676	protein_coding	CG10562
FBgn0035231	0.306007	0.204234	0.586703	protein_coding	Pcyt2
FBgn0038414	0.305794	0.0583427	0.316518	protein_coding	CG6901
FBgn0030410	0.305793	0.111868	0.444289	protein_coding	Aven
FBgn0003278	0.30572	0.172593	0.546553	protein_coding	RpI135
FBgn0039092	0.305265	0.139143	0.494536	protein_coding	CG16723
FBgn0033207	0.305196	0.323312	0.704674	protein_coding	CG12826
FBgn0263235	0.305151	0.0710587	0.355441	protein_coding	Phae2
FBgn0032437	0.304984	0.211757	0.596268	pseudogene	CR17024
FBgn0004055	0.304762	0.181013	0.556706	protein_coding	uzip
FBgn0037082	0.30457	0.141379	0.497978	protein_coding	CG5664
FBgn0052000	0.304533	0.00842728	0.099533	protein_coding	anne
FBgn0031815	0.304462	0.0228309	0.188733	protein_coding	frj
FBgn0031779	0.304349	0.0704496	0.353683	protein_coding	CG9175
FBgn0266707	0.304329	0.239983	0.625327	ncRNA	lncRNA:CR45197
FBgn0036142	0.304223	0.0286004	0.213481	protein_coding	Adck5
FBgn0029999	0.304196	0.141582	0.498023	protein_coding	CG1575
FBgn0041181	0.303979	0.0987853	0.415451	protein_coding	Tep3
FBgn0085330	0.30367	0.0389517	0.25448	protein_coding	CG34301
FBgn0030504	0.303381	0.102025	0.423629	protein_coding	CG2691
FBgn0267650	0.303362	0.304327	0.685682	protein_coding	pre-mod(mdg4)-AA
FBgn0035336	0.303144	0.109393	0.43876	protein_coding	CG9004
FBgn0010053	0.303088	0.077812	0.372686	protein_coding	Jheh1
FBgn0026666	0.302839	0.0724246	0.358876	protein_coding	MagR
FBgn0025700	0.302413	0.0247232	0.197468	protein_coding	CG5885
FBgn0034487	0.302225	0.193307	0.573805	protein_coding	Efhc1.2
FBgn0029843	0.301844	0.12703	0.472994	protein_coding	Nep1
FBgn0033240	0.301752	0.125038	0.467827	protein_coding	CG2906
FBgn0032373	0.301676	0.0531968	0.301571	protein_coding	Vha100-5
FBgn0003067	0.301608	0.16534	0.534131	protein_coding	Pepck1
FBgn0266488	0.301608	0.16534	0.534131	protein_coding	CG45087
FBgn0038772	0.301597	0.125059	0.467827	protein_coding	mdlc
FBgn0261361	0.301497	0.00977924	0.110382	protein_coding	CG42638
FBgn0262516	0.301497	0.00977924	0.110382	protein_coding	Trpml
FBgn0259227	0.301446	0.013509	0.134136	protein_coding	CG42327
FBgn0052017	0.301307	0.127298	0.473417	protein_coding	CG32017
FBgn0004396	0.301263	0.0268275	0.206006	protein_coding	CrebA
FBgn0040238	0.300909	0.0904987	0.400218	protein_coding	Best1
FBgn0261845	0.300888	0.272826	0.658702	protein_coding	pre-mod(mdg4)-U
FBgn0037203	0.300394	0.0401112	0.259007	protein_coding	slif
FBgn0031914	0.300357	0.104476	0.42888	protein_coding	CG5973
FBgn0083984	0.300197	0.179945	0.554815	protein_coding	CG34148
FBgn0032815	0.300142	0.0283868	0.212217	protein_coding	CG10462
FBgn0030178	0.300055	0.0585645	0.31708	protein_coding	Naxe
FBgn0000640	0.300014	0.181545	0.557162	protein_coding	Fbp2
FBgn0035063	0.299801	0.160847	0.526614	protein_coding	CG3594
FBgn0020655	0.299683	0.00428393	0.0624148	protein_coding	ArfGAP1
FBgn0030509	0.299511	0.115392	0.450019	protein_coding	CG11162
FBgn0030457	0.299449	0.0695958	0.35121	protein_coding	CG12096
FBgn0267164	0.299397	0.418867	0.778162	ncRNA	asRNA:CR45604
FBgn0283531	0.299361	0.186029	0.562416	protein_coding	Duox
FBgn0030519	0.299237	0.0230243	0.189041	protein_coding	CG11151
FBgn0025676	0.299186	0.123639	0.465594	protein_coding	CkIIalpha-i3
FBgn0000075	0.298991	0.282013	0.667429	protein_coding	amd
FBgn0004387	0.298955	0.184869	0.5616	protein_coding	Klp98A
FBgn0034605	0.298886	0.105379	0.430745	protein_coding	Ugt49C1
FBgn0036772	0.298772	0.248161	0.633685	protein_coding	CG5290
FBgn0052350	0.29828	0.049191	0.289352	protein_coding	Vps11
FBgn0036529	0.298093	0.251847	0.636489	protein_coding	Pgant8
FBgn0032744	0.298031	0.0772159	0.371362	protein_coding	Ttc19
FBgn0000810	0.29706	0.0678566	0.346086	protein_coding	fs(1)K10
FBgn0035669	0.297021	0.223667	0.605727	protein_coding	CG6592
FBgn0034797	0.296846	0.104154	0.428003	protein_coding	nahoda
FBgn0001323	0.296801	0.234355	0.62041	protein_coding	knrl
FBgn0035414	0.296621	0.305827	0.68761	protein_coding	CG14965
FBgn0028429	0.29622	0.0186713	0.164083	protein_coding	I-2
FBgn0038681	0.296138	0.0809139	0.378912	protein_coding	Cyp12a4
FBgn0268063	0.296103	0.299381	0.682221	protein_coding	ltl
FBgn0035771	0.295411	0.00852096	0.0999034	protein_coding	Sec63
FBgn0039407	0.294683	0.244447	0.630132	protein_coding	CG14544
FBgn0000057	0.294632	0.0137044	0.134994	protein_coding	adp
FBgn0038080	0.294574	0.0984327	0.414513	protein_coding	CG12279
FBgn0003079	0.294319	0.015286	0.145085	protein_coding	Raf
FBgn0025630	0.294159	0.0717095	0.35721	protein_coding	Rtca
FBgn0034406	0.293815	0.0566362	0.311143	protein_coding	Jheh3
FBgn0019925	0.293606	0.0187603	0.164414	protein_coding	Surf4
FBgn0038953	0.293589	0.0989817	0.416018	protein_coding	CG18596
FBgn0034931	0.293198	0.249105	0.634892	protein_coding	CG2812
FBgn0033693	0.292672	0.238258	0.623975	protein_coding	CG13175
FBgn0053964	0.292672	0.238258	0.623975	protein_coding	CG33964
FBgn0027348	0.292544	0.123937	0.46624	protein_coding	bgm
FBgn0032750	0.292387	0.234032	0.620001	protein_coding	CG10495
FBgn0032916	0.292356	0.13046	0.477423	protein_coding	CG9257
FBgn0032682	0.291992	0.199911	0.582407	protein_coding	grnd
FBgn0029975	0.291901	0.0990066	0.416018	protein_coding	spidey
FBgn0266745	0.291844	0.310801	0.69184	protein_coding	CG45218
FBgn0266636	0.291829	0.257589	0.642403	ncRNA	asRNA:CR45143
FBgn0027554	0.29143	0.0179506	0.160686	protein_coding	CG8042
FBgn0263200	0.291406	0.0438633	0.271655	protein_coding	Galt
FBgn0039525	0.29125	0.114873	0.449184	protein_coding	CG5646
FBgn0266000	0.291084	0.0492687	0.289352	protein_coding	CG44774
FBgn0030063	0.290918	0.176567	0.550426	protein_coding	CG1789
FBgn0036686	0.290769	0.107102	0.433733	protein_coding	CG7728
FBgn0262582	0.290767	0.0192624	0.168048	protein_coding	cic
FBgn0015550	0.29053	0.236963	0.622126	protein_coding	tap
FBgn0037070	0.290451	0.0461604	0.27909	protein_coding	CG11309
FBgn0037980	0.290408	0.107839	0.434934	protein_coding	DCAF12
FBgn0260499	0.290406	0.279665	0.666137	protein_coding	qvr
FBgn0037387	0.290282	0.132841	0.482664	protein_coding	CG1213
FBgn0031227	0.289906	0.216783	0.600795	protein_coding	CG3709
FBgn0031126	0.289869	0.0221314	0.184377	protein_coding	Cyp6v1
FBgn0003655	0.289813	0.27318	0.658702	protein_coding	swa
FBgn0038767	0.289713	0.164109	0.532785	protein_coding	trem
FBgn0029825	0.289263	0.227566	0.610861	protein_coding	CG12728
FBgn0030057	0.28911	0.0947612	0.407987	protein_coding	Ppt1
FBgn0023516	0.289077	0.042717	0.267196	protein_coding	Pex5
FBgn0030797	0.288834	0.251855	0.636489	protein_coding	CG13004
FBgn0034270	0.288692	0.172385	0.546553	protein_coding	PIG-A
FBgn0032715	0.288642	0.0721725	0.358402	protein_coding	CG17597
FBgn0035244	0.288549	0.0289761	0.215117	protein_coding	ABCB7
FBgn0038349	0.288504	0.0751361	0.365566	protein_coding	AOX3
FBgn0035150	0.288454	0.119225	0.457273	protein_coding	Rev1
FBgn0024983	0.288392	0.177263	0.551345	protein_coding	CG4293
FBgn0036769	0.288351	0.164299	0.532919	protein_coding	Tsp74F
FBgn0050265	0.288282	0.315828	0.697884	protein_coding	CG30265
FBgn0014877	0.288272	0.0873186	0.392098	protein_coding	Roe1
FBgn0050076	0.288137	0.274372	0.659454	protein_coding	CG30076
FBgn0283437	0.28807	0.538272	0.845662	protein_coding	PPO1
FBgn0033715	0.288068	0.176175	0.550361	protein_coding	CG8490
FBgn0033128	0.287715	0.0887882	0.395415	protein_coding	Tsp42Eg
FBgn0005648	0.287644	0.148658	0.50825	protein_coding	Pabp2
FBgn0263987	0.287548	0.0157978	0.147743	protein_coding	spoon
FBgn0023097	0.287499	0.0199922	0.172227	protein_coding	bon
FBgn0002945	0.287271	0.0769036	0.370417	protein_coding	nkd
FBgn0051522	0.287018	0.168667	0.540935	protein_coding	CG31522
FBgn0035356	0.286766	0.0578388	0.315179	protein_coding	CG16986
FBgn0033459	0.286511	0.356854	0.732382	protein_coding	CG12744
FBgn0035176	0.286499	0.465472	0.807134	protein_coding	CG13905
FBgn0033033	0.286331	0.4556	0.800693	protein_coding	scaf
FBgn0001206	0.286239	0.216983	0.600795	protein_coding	Hmr
FBgn0265914	0.286177	0.353624	0.729089	ncRNA	asRNA:CR44703
FBgn0031040	0.286116	0.246741	0.632411	protein_coding	CG14210
FBgn0032051	0.285937	0.114333	0.448967	protein_coding	CG13097
FBgn0039241	0.285876	0.158821	0.523629	protein_coding	CG11089
FBgn0036419	0.285334	0.227282	0.610632	protein_coding	CG13482
FBgn0036627	0.285201	0.132756	0.482539	protein_coding	Gagr
FBgn0036007	0.284912	0.107194	0.433737	protein_coding	path
FBgn0051202	0.284583	0.220305	0.603036	protein_coding	alpha-Man-Ic
FBgn0043578	0.284559	0.288156	0.673718	protein_coding	PGRP-SB1
FBgn0085405	0.284531	0.0604487	0.322505	protein_coding	CG34376
FBgn0032480	0.284456	0.0193517	0.168674	protein_coding	Edem2
FBgn0002930	0.284096	0.184016	0.561272	protein_coding	nec
FBgn0030357	0.28409	0.249199	0.634892	protein_coding	Sclp
FBgn0054001	0.283823	0.258908	0.643855	protein_coding	CG34001
FBgn0035620	0.283818	0.0905423	0.400218	protein_coding	Alp9
FBgn0029117	0.283434	0.092886	0.404913	protein_coding	Surf1
FBgn0035906	0.283405	0.00680062	0.0861412	protein_coding	GstO2
FBgn0039764	0.283366	0.138391	0.493618	protein_coding	CG15535
FBgn0034191	0.283305	0.201948	0.584435	protein_coding	CG6984
FBgn0022069	0.283244	0.204954	0.587486	protein_coding	Nnp-1
FBgn0032123	0.283165	0.172653	0.546553	protein_coding	Oatp30B
FBgn0264572	0.283015	0.300245	0.6824	ncRNA	asRNA:CR43944
FBgn0267041	0.28299	0.329678	0.709672	ncRNA	asRNA:CR45485
FBgn0035501	0.282978	0.127185	0.473203	protein_coding	CG1299
FBgn0034688	0.282882	0.059145	0.319074	protein_coding	CG11474
FBgn0030687	0.282556	0.0328252	0.231534	protein_coding	RpIIIC160
FBgn0031005	0.28199	0.262118	0.648604	protein_coding	Hs3st-B
FBgn0051812	0.281928	0.155399	0.518753	protein_coding	Tsen2
FBgn0031080	0.281348	0.456761	0.800693	protein_coding	CG12655
FBgn0036819	0.281318	0.191081	0.570699	protein_coding	Dysb
FBgn0033129	0.281123	0.298324	0.681999	protein_coding	Tsp42Eh
FBgn0034025	0.28052	0.11151	0.443733	protein_coding	Pgant1
FBgn0262160	0.280375	0.116034	0.450891	protein_coding	CG9932
FBgn0034590	0.280367	0.105601	0.431105	protein_coding	Magi
FBgn0031604	0.280367	0.202879	0.585582	protein_coding	Elp3
FBgn0266369	0.280356	0.0770718	0.371041	protein_coding	Mtp
FBgn0039697	0.280265	0.0721635	0.358402	protein_coding	CG7834
FBgn0035020	0.280264	0.0671592	0.343258	protein_coding	CG13585
FBgn0032752	0.280192	0.127767	0.47372	protein_coding	CG10702
FBgn0015776	0.2799	0.0384458	0.251955	protein_coding	nrv1
FBgn0035901	0.279897	0.175816	0.550107	protein_coding	Pus7
FBgn0039154	0.279826	0.135302	0.487372	protein_coding	Npc2f
FBgn0031183	0.279821	0.0347189	0.239274	protein_coding	CG14621
FBgn0010315	0.279816	0.0786157	0.373425	protein_coding	CycD
FBgn0036695	0.279755	0.105799	0.431544	protein_coding	Papst2
FBgn0053217	0.279624	0.0844678	0.385783	protein_coding	CG33217
FBgn0036300	0.279564	0.0177828	0.159632	protein_coding	Pmm2
FBgn0028397	0.279522	0.144302	0.502178	protein_coding	Tob
FBgn0010100	0.279362	0.0350697	0.240314	protein_coding	mAcon1
FBgn0266694	0.279253	0.153892	0.516065	ncRNA	lncRNA:CR45184
FBgn0039283	0.279116	0.327614	0.707879	protein_coding	danr
FBgn0038268	0.279098	0.114409	0.448967	protein_coding	CG3631
FBgn0053129	0.278993	0.0533709	0.301651	protein_coding	CG33129
FBgn0052204	0.278788	0.301321	0.683153	protein_coding	CG32204
FBgn0030088	0.278745	0.102204	0.423629	protein_coding	Arfrp1
FBgn0039641	0.278635	0.18677	0.56324	protein_coding	CG14511
FBgn0039622	0.278627	0.330034	0.709672	protein_coding	eIF4E6
FBgn0035490	0.278558	0.164882	0.533731	protein_coding	CG1136
FBgn0053013	0.278444	0.12415	0.46624	pseudogene	CR33013
FBgn0037972	0.278403	0.322188	0.703854	protein_coding	CG10005
FBgn0037634	0.27838	0.279371	0.665865	protein_coding	hng2
FBgn0051388	0.278314	0.295678	0.68006	protein_coding	CG31388
FBgn0029664	0.278157	0.0869925	0.392098	protein_coding	CG10802
FBgn0036804	0.278137	0.152037	0.51341	protein_coding	Sgf11
FBgn0032734	0.278131	0.229136	0.612851	protein_coding	CG15169
FBgn0050183	0.277695	0.170432	0.543616	protein_coding	CG30183
FBgn0031245	0.277566	0.0169058	0.155088	protein_coding	CG3625
FBgn0033557	0.277565	0.273296	0.658702	protein_coding	CG12325
FBgn0004901	0.277258	0.134574	0.48584	protein_coding	Prat
FBgn0052054	0.277239	0.0176028	0.159072	protein_coding	CG32054
FBgn0030874	0.277226	0.143179	0.501284	protein_coding	Spt7
FBgn0031169	0.277173	0.173979	0.548225	protein_coding	CG1494
FBgn0086445	0.27717	0.185777	0.562246	protein_coding	l(2)37Cd
FBgn0039828	0.277066	0.239751	0.625327	protein_coding	CG1542
FBgn0038318	0.27704	0.0104903	0.115658	protein_coding	CG6236
FBgn0051637	0.276964	0.0916704	0.403006	protein_coding	CG31637
FBgn0030695	0.276844	0.0418615	0.265091	protein_coding	PGRP-LE
FBgn0261387	0.276274	0.0328883	0.231571	protein_coding	CG17528
FBgn0039115	0.276231	0.100529	0.420211	protein_coding	CG10214
FBgn0050100	0.27601	0.120064	0.458665	protein_coding	CG30100
FBgn0259718	0.27601	0.120064	0.458665	protein_coding	CG42372
FBgn0086448	0.275729	0.249863	0.63531	protein_coding	PIG-Q
FBgn0051678	0.275602	0.0863063	0.390502	protein_coding	CG31678
FBgn0035026	0.275567	0.087194	0.392098	protein_coding	Fcp1
FBgn0028572	0.275311	0.0138225	0.135601	protein_coding	qtc
FBgn0038306	0.275216	0.263213	0.649781	protein_coding	Art3
FBgn0004852	0.275012	0.0881223	0.394377	protein_coding	Ac76E
FBgn0039238	0.274838	0.175892	0.550107	protein_coding	CG7016
FBgn0031384	0.274758	0.156303	0.51919	protein_coding	CG4238
FBgn0053523	0.274722	0.0157767	0.14769	protein_coding	CG33523
FBgn0032262	0.274699	0.249961	0.63531	protein_coding	CG7384
FBgn0027835	0.274677	0.0103797	0.114966	protein_coding	Dp1
FBgn0037549	0.27458	0.0523303	0.300181	protein_coding	CG7878
FBgn0263975	0.274453	0.332457	0.712169	pseudogene	CR43727
FBgn0264816	0.274264	0.270591	0.656788	protein_coding	koko
FBgn0038601	0.273693	0.226878	0.6101	protein_coding	CG18600
FBgn0030272	0.273542	0.240391	0.625461	protein_coding	CG15201
FBgn0259916	0.273506	0.145857	0.505504	protein_coding	CG42445
FBgn0034703	0.273293	0.308107	0.688899	protein_coding	CG3045
FBgn0052755	0.273242	0.221263	0.603981	protein_coding	CG32755
FBgn0019938	0.273141	0.195356	0.576699	protein_coding	RpI1
FBgn0033234	0.273117	0.299623	0.682221	protein_coding	MFS12
FBgn0015766	0.272851	0.112867	0.445904	protein_coding	Msr-110
FBgn0032414	0.27262	0.339562	0.71859	protein_coding	CG17211
FBgn0031607	0.272492	0.0662963	0.342305	protein_coding	Secp43
FBgn0031764	0.272447	0.23929	0.625316	protein_coding	CG9107
FBgn0014342	0.27224	0.191444	0.571511	protein_coding	mia
FBgn0034307	0.272144	0.203239	0.585715	protein_coding	CG10914
FBgn0026079	0.272102	0.222231	0.604734	protein_coding	Nsun2
FBgn0030051	0.272007	0.277853	0.664242	protein_coding	spirit
FBgn0053198	0.27193	0.231289	0.616423	protein_coding	pen-2
FBgn0038771	0.271929	0.0295133	0.217426	protein_coding	CG4390
FBgn0031062	0.271885	0.212337	0.596381	protein_coding	CG14230
FBgn0035529	0.271691	0.0488246	0.287915	protein_coding	Fdx2
FBgn0014931	0.271689	0.28017	0.666355	protein_coding	CG2678
FBgn0083123	0.271139	0.377923	0.751087	ncRNA	Uhg5
FBgn0030000	0.271003	0.225826	0.607978	protein_coding	CG2260
FBgn0013276	0.270855	0.432561	0.788631	protein_coding	Hsp70Ab
FBgn0036090	0.270802	0.0826808	0.38244	protein_coding	CG8009
FBgn0037200	0.27076	0.200838	0.582989	protein_coding	CG11109
FBgn0053196	0.270725	0.124082	0.46624	protein_coding	dpy
FBgn0284222	0.270687	0.288057	0.673652	protein_coding	CG46306
FBgn0050339	0.270637	0.0891754	0.396546	protein_coding	CG30339
FBgn0264296	0.270636	0.0908807	0.400792	protein_coding	CG43774
FBgn0030511	0.270509	0.198121	0.580712	protein_coding	CG11158
FBgn0001185	0.270493	0.0968073	0.411635	protein_coding	her
FBgn0030474	0.270443	0.084333	0.385783	protein_coding	CG15747
FBgn0038675	0.27031	0.0871689	0.392098	protein_coding	CG6013
FBgn0062413	0.270182	0.0402361	0.259269	protein_coding	Ctr1A
FBgn0037842	0.270099	0.0349348	0.239842	protein_coding	CG6567
FBgn0037678	0.270026	0.140977	0.497909	protein_coding	CG16749
FBgn0033507	0.269863	0.270883	0.656857	protein_coding	CG12909
FBgn0031344	0.269807	0.146328	0.505861	protein_coding	CG7420
FBgn0032139	0.269713	0.323048	0.704356	protein_coding	CG13116
FBgn0031657	0.269651	0.269946	0.656788	protein_coding	CG3756
FBgn0267668	0.269471	0.344649	0.721835	ncRNA	lncRNA:CR46006
FBgn0028360	0.269462	0.137234	0.491063	protein_coding	Cdc7
FBgn0026196	0.269252	0.224381	0.606979	protein_coding	nop5
FBgn0036848	0.269218	0.0634106	0.332585	protein_coding	Naxd
FBgn0038652	0.269191	0.247826	0.633333	protein_coding	CG7720
FBgn0010292	0.269185	0.185523	0.562246	protein_coding	bys
FBgn0283438	0.269141	0.0044582	0.0639719	protein_coding	CG46280
FBgn0035726	0.269052	0.0258359	0.201799	protein_coding	CG9953
FBgn0010340	0.269048	0.0835007	0.384103	protein_coding	140up
FBgn0037146	0.268984	0.114574	0.448967	protein_coding	CG7470
FBgn0010385	0.268983	0.207687	0.590741	protein_coding	Def
FBgn0035400	0.268762	0.0525552	0.300992	protein_coding	CG11537
FBgn0038545	0.268725	0.324962	0.70533	protein_coding	pasi1
FBgn0031494	0.268662	0.272933	0.658702	protein_coding	CG17219
FBgn0037883	0.268221	0.267847	0.654738	protein_coding	CG14701
FBgn0036922	0.268191	0.3071	0.688469	protein_coding	CG14182
FBgn0028744	0.267894	0.212966	0.596638	protein_coding	CG5033
FBgn0036821	0.26772	0.151847	0.512951	protein_coding	CG3961
FBgn0045800	0.267623	0.241042	0.625979	ncRNA	Uhg1
FBgn0085208	0.267387	0.24444	0.630132	protein_coding	CG34179
FBgn0033683	0.267125	0.0757854	0.367238	protein_coding	CG18343
FBgn0036484	0.267048	0.0297556	0.218136	protein_coding	Pex3
FBgn0035325	0.266973	0.26551	0.652342	protein_coding	CG13806
FBgn0035121	0.26697	0.0296597	0.218049	protein_coding	Tudor-SN
FBgn0027512	0.266914	0.141504	0.497978	protein_coding	CG10254
FBgn0038854	0.266903	0.0143308	0.139309	protein_coding	CG7044
FBgn0037106	0.266841	0.241315	0.626519	protein_coding	CG11307
FBgn0036249	0.26679	0.193572	0.573843	protein_coding	CG11560
FBgn0040308	0.266731	0.0453115	0.276236	protein_coding	Jafrac2
FBgn0021874	0.266719	0.165329	0.534131	protein_coding	Nle
FBgn0035827	0.266495	0.0357188	0.242856	protein_coding	Srp9
FBgn0263605	0.266023	0.256053	0.640898	protein_coding	l(3)72Dn
FBgn0050169	0.266001	0.174768	0.549233	protein_coding	Brca2
FBgn0028543	0.265786	0.306617	0.687938	protein_coding	NimB2
FBgn0010926	0.265708	0.169383	0.542634	protein_coding	l(3)07882
FBgn0029714	0.265605	0.284627	0.669999	protein_coding	CG3527
FBgn0034387	0.265595	0.0654061	0.339533	protein_coding	Cyp12b2
FBgn0032781	0.265327	0.0766971	0.369902	protein_coding	RtcB
FBgn0032001	0.265178	0.0668824	0.343258	protein_coding	CG8360
FBgn0010803	0.264879	0.058041	0.315972	protein_coding	TrpRS
FBgn0085260	0.264845	0.361035	0.735726	protein_coding	CG34231
FBgn0051495	0.264834	0.207162	0.589953	protein_coding	CG31495
FBgn0010435	0.264808	0.151743	0.512951	protein_coding	emp
FBgn0015721	0.264513	0.299523	0.682221	protein_coding	ktub
FBgn0034199	0.264415	0.300011	0.682221	protein_coding	Gbp1
FBgn0033987	0.263727	0.0220211	0.183794	protein_coding	ckn
FBgn0050446	0.263604	0.248135	0.633685	protein_coding	Tdc2
FBgn0042103	0.263533	0.145402	0.50411	protein_coding	CG18746
FBgn0036999	0.26336	0.0184969	0.162847	protein_coding	isoQC
FBgn0035762	0.263118	0.130621	0.477423	protein_coding	Rint1
FBgn0034371	0.26306	0.0682508	0.347728	protein_coding	Ntan1
FBgn0004197	0.263027	0.302901	0.684231	protein_coding	Ser
FBgn0041630	0.262951	0.121736	0.461137	protein_coding	Hexo1
FBgn0026878	0.262622	0.309149	0.690372	protein_coding	CG4325
FBgn0011016	0.262214	0.0280839	0.211432	protein_coding	SsRbeta
FBgn0040623	0.262109	0.0648883	0.337901	protein_coding	Spase12
FBgn0038803	0.262061	0.155299	0.518598	protein_coding	CG5191
FBgn0263260	0.261784	0.107091	0.433733	protein_coding	sel
FBgn0036759	0.261765	0.119606	0.457747	protein_coding	CG5577
FBgn0034655	0.261606	0.359241	0.734604	protein_coding	CG10307
FBgn0039342	0.2614	0.136523	0.490123	protein_coding	CG5107
FBgn0033457	0.260948	0.0814635	0.379991	protein_coding	Ntmt
FBgn0032408	0.26085	0.228606	0.611866	protein_coding	CG6712
FBgn0050443	0.260825	0.117498	0.453482	protein_coding	Opbp
FBgn0284251	0.260662	0.206578	0.589329	protein_coding	l(2)05287
FBgn0036545	0.260537	0.219687	0.603036	protein_coding	GXIVsPLA2
FBgn0036301	0.260454	0.318021	0.70077	protein_coding	CG4069
FBgn0086444	0.260453	0.10134	0.421949	protein_coding	l(2)37Cb
FBgn0035211	0.260344	0.214994	0.598848	protein_coding	CG2211
FBgn0264848	0.260307	0.114678	0.448967	protein_coding	vih
FBgn0038662	0.260272	0.157764	0.521756	protein_coding	Mpc1
FBgn0037996	0.26002	0.195492	0.576699	protein_coding	CG4830
FBgn0015829	0.260017	0.0970769	0.411719	protein_coding	TfIIEbeta
FBgn0029894	0.259882	0.11578	0.450682	protein_coding	CG14440
FBgn0033733	0.259879	0.0851756	0.388126	protein_coding	CG8834
FBgn0033431	0.259845	0.0457202	0.277946	protein_coding	CG1827
FBgn0039802	0.259686	0.0901758	0.399332	protein_coding	dj-1beta
FBgn0262782	0.259644	0.0708757	0.354895	protein_coding	Mdh1
FBgn0027596	0.259347	0.0815693	0.380129	protein_coding	Kank
FBgn0259171	0.259156	0.181268	0.556955	protein_coding	Pde9
FBgn0067628	0.258986	0.213358	0.596895	protein_coding	CG33331
FBgn0052344	0.258944	0.188508	0.56617	protein_coding	CG32344
FBgn0030638	0.258939	0.102224	0.423629	protein_coding	CG11655
FBgn0037121	0.258932	0.144934	0.502667	protein_coding	Rpb8
FBgn0052985	0.258867	0.258377	0.643056	protein_coding	CG32985
FBgn0030711	0.258594	0.154311	0.517094	protein_coding	Rrp47
FBgn0026721	0.258573	0.334896	0.714217	protein_coding	fat-spondin
FBgn0034053	0.258456	0.32442	0.705155	protein_coding	Cyp4aa1
FBgn0027790	0.258365	0.304124	0.685545	protein_coding	GV1
FBgn0001234	0.258192	0.301316	0.683153	ncRNA	lncRNA:Hsromega
FBgn0260720	0.258161	0.23378	0.619674	ncRNA	asRNA:CR42547
FBgn0032032	0.258119	0.240452	0.625461	protein_coding	CG17294
FBgn0028737	0.258006	0.0371313	0.246364	protein_coding	eEF1beta
FBgn0011723	0.257672	0.574428	0.862359	protein_coding	byn
FBgn0037815	0.257571	0.266216	0.652742	protein_coding	Rrp46
FBgn0037956	0.257502	0.151737	0.512951	protein_coding	CG6959
FBgn0062449	0.257466	0.0945815	0.407987	protein_coding	CG13197
FBgn0036317	0.25709	0.0812568	0.379963	protein_coding	CG10948
FBgn0050354	0.257048	0.428243	0.785753	protein_coding	UQCR-11L
FBgn0038237	0.256804	0.180137	0.555076	protein_coding	Pde6
FBgn0034804	0.256635	0.285813	0.671507	protein_coding	CG3831
FBgn0030717	0.256607	0.0869853	0.392098	protein_coding	Slc25A46a
FBgn0035398	0.256552	0.336036	0.71493	protein_coding	Cht7
FBgn0035213	0.256365	0.158243	0.522981	protein_coding	CG2199
FBgn0035407	0.256338	0.271827	0.657863	protein_coding	Asciz
FBgn0035849	0.256329	0.159425	0.524313	protein_coding	ERR
FBgn0039867	0.255984	0.244507	0.630132	protein_coding	CstF50
FBgn0038421	0.255974	0.150913	0.512409	protein_coding	CG17931
FBgn0259704	0.255838	0.15752	0.521487	protein_coding	Nsun5
FBgn0026756	0.255778	0.173384	0.547263	protein_coding	Ugt37A1
FBgn0020415	0.255743	0.215518	0.599482	protein_coding	Idgf2
FBgn0261554	0.255558	0.138696	0.494106	protein_coding	CG42672
FBgn0036886	0.255232	0.225724	0.607874	protein_coding	CG9300
FBgn0027514	0.255185	0.144914	0.502667	protein_coding	CG1024
FBgn0033948	0.255163	0.336249	0.71493	protein_coding	CG12863
FBgn0030420	0.255059	0.228452	0.611777	protein_coding	CG12717
FBgn0050497	0.255054	0.038739	0.25352	NA	NA
FBgn0266526	0.255054	0.038739	0.25352	NA	NA
FBgn0029763	0.255046	0.0240802	0.193892	protein_coding	Usp16-45
FBgn0003068	0.254752	0.197348	0.578964	protein_coding	per
FBgn0035987	0.254467	0.0467099	0.280668	protein_coding	Cpsf5
FBgn0261631	0.254135	0.19361	0.573843	protein_coding	CG42714
FBgn0032394	0.254112	0.0886621	0.395177	protein_coding	Hacd1
FBgn0086708	0.253354	0.166865	0.537794	protein_coding	stv
FBgn0038479	0.253344	0.307335	0.688469	protein_coding	CG17477
FBgn0033741	0.25329	0.236978	0.622126	protein_coding	CG8545
FBgn0031997	0.253275	0.139015	0.494517	protein_coding	PGAP5
FBgn0050349	0.253161	0.223745	0.605768	protein_coding	CG30349
FBgn0266377	0.253144	0.13957	0.495278	protein_coding	Pde8
FBgn0038484	0.252912	0.291046	0.6762	protein_coding	CG5246
FBgn0027101	0.25271	0.0493712	0.289777	protein_coding	Dyrk3
FBgn0033520	0.252688	0.34044	0.718666	protein_coding	Prx2540-1
FBgn0027844	0.25255	0.0862143	0.390502	protein_coding	CAH1
FBgn0034853	0.252388	0.09766	0.412726	protein_coding	Ice1
FBgn0263316	0.2523	0.141424	0.497978	protein_coding	Mrp4
FBgn0037108	0.252282	0.0136562	0.134726	protein_coding	Alg11
FBgn0035558	0.251924	0.112461	0.44569	protein_coding	CG11357
FBgn0052409	0.251752	0.246707	0.632411	protein_coding	CG32409
FBgn0030851	0.251652	0.346736	0.724477	protein_coding	CG8326
FBgn0039941	0.251426	0.114648	0.448967	protein_coding	CG17167
FBgn0052111	0.25133	0.361961	0.736173	ncRNA	lncRNA:CR32111
FBgn0032054	0.251143	0.0714223	0.356518	protein_coding	Uba4
FBgn0283741	0.250999	0.221035	0.603749	protein_coding	prage
FBgn0030456	0.250925	0.140211	0.496314	protein_coding	CG4332
FBgn0260006	0.250905	0.183176	0.55942	protein_coding	drd
FBgn0260388	0.250756	0.163568	0.531921	protein_coding	CG42514
FBgn0026718	0.250661	0.1441	0.502178	protein_coding	Agpat2
FBgn0000316	0.250645	0.0945212	0.407987	protein_coding	cin
FBgn0037301	0.250572	0.0582457	0.316518	protein_coding	Mms19
FBgn0051800	0.250533	0.193777	0.574077	protein_coding	CG31800
FBgn0036220	0.250476	0.388729	0.758742	protein_coding	CG5897
FBgn0264950	0.25039	0.308192	0.688899	ncRNA	asRNA:CR44119
FBgn0039145	0.250283	0.143862	0.501936	protein_coding	CG6000
FBgn0038828	0.250182	0.15459	0.517127	protein_coding	CG17270
FBgn0038989	0.250084	0.245523	0.631759	protein_coding	CG6937
FBgn0011335	0.250082	0.156676	0.519944	protein_coding	vers
FBgn0038307	0.249979	0.212187	0.596268	protein_coding	mRpS10
FBgn0031473	0.249935	0.231841	0.616897	protein_coding	CG3104
FBgn0050277	0.249357	0.156905	0.520348	protein_coding	Oatp58Da
FBgn0259211	0.24927	0.324559	0.705155	protein_coding	grh
FBgn0037228	0.249194	0.372455	0.746619	protein_coding	CG1092
FBgn0030653	0.249001	0.297702	0.681562	protein_coding	CG7860
FBgn0050438	0.248934	0.337486	0.716615	protein_coding	Ugt50B3
FBgn0063670	0.2489	0.160876	0.526614	protein_coding	CG40228
FBgn0037622	0.248683	0.0443907	0.273047	protein_coding	CG8202
FBgn0051233	0.248542	0.129443	0.475835	protein_coding	CG31233
FBgn0000279	0.248537	0.297646	0.681562	protein_coding	CecC
FBgn0267521	0.248316	0.212154	0.596268	pseudogene	18SrRNA-Psi:CR45861
FBgn0032061	0.248309	0.385472	0.755848	protein_coding	CG9314
FBgn0032233	0.248257	0.369728	0.744978	protein_coding	dpr19
FBgn0016031	0.248111	0.182756	0.558491	protein_coding	lama
FBgn0036029	0.248084	0.381931	0.753553	protein_coding	CG16719
FBgn0053181	0.248044	0.0449681	0.275015	protein_coding	CG33181
FBgn0030177	0.247779	0.21891	0.602691	protein_coding	CG2972
FBgn0030731	0.247675	0.119316	0.457273	protein_coding	Mfe2
FBgn0035591	0.247609	0.150028	0.511661	protein_coding	CG4611
FBgn0263278	0.247519	0.17647	0.550361	protein_coding	Fic
FBgn0051251	0.247416	0.324059	0.705155	protein_coding	CG31251
FBgn0037934	0.247385	0.18543	0.562246	protein_coding	CG6830
FBgn0011708	0.247248	0.0729525	0.359125	protein_coding	Syx5
FBgn0038746	0.24724	0.30274	0.684028	protein_coding	Surf6
FBgn0260397	0.246882	0.190265	0.569248	protein_coding	Su(var)3-3
FBgn0034883	0.246677	0.109861	0.439963	protein_coding	Eglp2
FBgn0030096	0.246368	0.209675	0.593029	protein_coding	Zpr1
FBgn0038146	0.246318	0.18531	0.562246	protein_coding	CG9799
FBgn0034231	0.246208	0.204315	0.586703	protein_coding	APC10
FBgn0034197	0.24617	0.482434	0.818444	protein_coding	Cda9
FBgn0052736	0.246085	0.147378	0.507203	protein_coding	CG32736
FBgn0259204	0.246085	0.147378	0.507203	protein_coding	CG42308
FBgn0263782	0.245939	0.124729	0.467322	protein_coding	Hmgcr
FBgn0040507	0.24588	0.11014	0.4401	protein_coding	ACXD
FBgn0050466	0.245797	0.292287	0.67778	protein_coding	CG30466
FBgn0054056	0.245761	0.235106	0.620624	protein_coding	CG34056
FBgn0029828	0.245646	0.269747	0.656788	protein_coding	CG6067
FBgn0030675	0.245528	0.230595	0.615133	protein_coding	CG8191
FBgn0037386	0.245473	0.33003	0.709672	protein_coding	CG1208
FBgn0037341	0.245382	0.164108	0.532785	protein_coding	CG12746
FBgn0038741	0.245204	0.304062	0.685545	protein_coding	CG17186
FBgn0000053	0.2451	0.0937247	0.406529	protein_coding	Gart
FBgn0030300	0.244788	0.0492418	0.289352	protein_coding	Sk1
FBgn0034511	0.24475	0.341104	0.718666	protein_coding	GNBP-like3
FBgn0260855	0.244681	0.0433904	0.269908	protein_coding	Sec22
FBgn0263745	0.244584	0.314951	0.697286	pseudogene	CR43670
FBgn0022361	0.244486	0.0462609	0.279367	protein_coding	Pur-alpha
FBgn0014396	0.244335	0.21577	0.599792	protein_coding	tim
FBgn0027093	0.244307	0.0944899	0.407987	protein_coding	ArgRS
FBgn0027094	0.244247	0.120129	0.458665	protein_coding	AlaRS
FBgn0032198	0.244207	0.0887978	0.395415	protein_coding	eEF1delta
FBgn0034214	0.244104	0.133822	0.484308	protein_coding	CG6550
FBgn0004839	0.243944	0.115746	0.450682	protein_coding	otk
FBgn0035880	0.243825	0.27711	0.663876	protein_coding	Culd
FBgn0000276	0.243775	0.209729	0.593029	protein_coding	CecA1
FBgn0050410	0.243729	0.258646	0.643536	protein_coding	Rpi
FBgn0023000	0.24368	0.173151	0.547263	protein_coding	mth
FBgn0034650	0.243652	0.171422	0.54489	protein_coding	NC2alpha
FBgn0040070	0.243547	0.0423264	0.265791	protein_coding	Trx-2
FBgn0038422	0.243528	0.270018	0.656788	protein_coding	CG14880
FBgn0086856	0.243504	0.255228	0.640503	protein_coding	CG11555
FBgn0053977	0.24349	0.205371	0.587981	protein_coding	CG33977
FBgn0030630	0.243365	0.195212	0.576699	protein_coding	CG12608
FBgn0037535	0.243089	0.113925	0.44833	protein_coding	PIG-H
FBgn0035206	0.242951	0.0195717	0.170129	protein_coding	sturkopf
FBgn0035076	0.242785	0.378927	0.751906	protein_coding	Ance-5
FBgn0032513	0.242618	0.182448	0.558464	protein_coding	CG6565
FBgn0030334	0.242323	0.637866	0.891637	protein_coding	Karl
FBgn0042092	0.241955	0.302621	0.684028	protein_coding	CG13773
FBgn0038156	0.241611	0.452345	0.798766	protein_coding	side-IV
FBgn0261929	0.241326	0.414749	0.775758	protein_coding	5-HT2B
FBgn0029798	0.241297	0.192168	0.572337	protein_coding	CG4078
FBgn0038475	0.241155	0.195412	0.576699	protein_coding	Keap1
FBgn0266136	0.241112	0.191527	0.571511	protein_coding	Gyc76C
FBgn0040366	0.241072	0.370009	0.744978	protein_coding	CG11398
FBgn0032940	0.241043	0.106392	0.432684	protein_coding	Mondo
FBgn0035443	0.240811	0.290555	0.67554	protein_coding	CG12010
FBgn0002354	0.240758	0.215196	0.598986	protein_coding	l(3)87Df
FBgn0033903	0.240751	0.151434	0.512862	protein_coding	CG8323
FBgn0267330	0.240671	0.0146375	0.141007	protein_coding	KdelR
FBgn0036000	0.240549	0.254736	0.640269	protein_coding	CG3434
FBgn0037239	0.240436	0.139754	0.495608	protein_coding	Sfxn1-3
FBgn0050499	0.240376	0.283979	0.669489	protein_coding	Rpe
FBgn0261995	0.239984	0.0521012	0.299045	protein_coding	CG42813
FBgn0015038	0.239914	0.22021	0.603036	protein_coding	Cyp9b1
FBgn0036489	0.239794	0.249413	0.634892	protein_coding	CG7011
FBgn0032225	0.239757	0.273037	0.658702	protein_coding	CG5022
FBgn0030890	0.239696	0.122512	0.462984	protein_coding	CG7536
FBgn0264574	0.239382	0.203915	0.586703	protein_coding	Glut1
FBgn0031435	0.239261	0.42419	0.782757	protein_coding	Elba2
FBgn0011829	0.239151	0.335524	0.714922	protein_coding	Ret
FBgn0264834	0.238937	0.349989	0.726924	ncRNA	lncRNA:CR44042
FBgn0032422	0.238826	0.183926	0.561176	protein_coding	atilla
FBgn0033473	0.238321	0.188618	0.566202	protein_coding	CG12128
FBgn0036623	0.238297	0.112789	0.445904	protein_coding	Agpat3
FBgn0028988	0.238214	0.271616	0.657863	protein_coding	Spn42Dd
FBgn0035890	0.238172	0.215085	0.598848	protein_coding	CG13667
FBgn0037061	0.237951	0.31499	0.697286	protein_coding	CG12975
FBgn0025874	0.237842	0.19648	0.577487	protein_coding	Meics
FBgn0037473	0.237608	0.110242	0.440327	protein_coding	CG10068
FBgn0031182	0.237568	0.162956	0.530352	protein_coding	Cyp6t1
FBgn0032169	0.237562	0.236925	0.622126	protein_coding	CG4709
FBgn0027539	0.237196	0.0903129	0.399755	protein_coding	lili
FBgn0003015	0.236883	0.104733	0.429199	protein_coding	osk
FBgn0026787	0.236711	0.0261283	0.20307	protein_coding	Nhe1
FBgn0035607	0.236022	0.511334	0.834325	protein_coding	CG4835
FBgn0261563	0.235819	0.179274	0.554435	protein_coding	wb
FBgn0030306	0.235587	0.0775289	0.372495	protein_coding	Spase25
FBgn0027784	0.235559	0.245361	0.631759	protein_coding	Prp18
FBgn0035867	0.235257	0.17585	0.550107	protein_coding	CG13671
FBgn0038056	0.235128	0.0858945	0.390242	protein_coding	CG5961
FBgn0036030	0.235115	0.245471	0.631759	protein_coding	Prps
FBgn0039094	0.235088	0.413561	0.775196	protein_coding	CG10184
FBgn0030321	0.235071	0.0822317	0.381758	protein_coding	CG1703
FBgn0034113	0.235004	0.154559	0.517127	protein_coding	CG8060
FBgn0037332	0.23415	0.098149	0.413647	protein_coding	Hcs
FBgn0035838	0.234108	0.360559	0.735657	protein_coding	ldbr
FBgn0004858	0.233781	0.128948	0.475835	protein_coding	elB
FBgn0038542	0.233735	0.312518	0.694212	protein_coding	TyrR
FBgn0010309	0.233525	0.180401	0.555532	protein_coding	pigeon
FBgn0039789	0.233501	0.587222	0.868882	protein_coding	CG9717
FBgn0052773	0.233194	0.418734	0.778066	ncRNA	lncRNA:CR32773
FBgn0086690	0.233034	0.214512	0.598294	protein_coding	Plp
FBgn0030759	0.232883	0.201658	0.584435	protein_coding	CG13014
FBgn0031313	0.232794	0.24164	0.626662	protein_coding	CG5080
FBgn0036335	0.232687	0.133468	0.483485	protein_coding	mRpL20
FBgn0027574	0.232686	0.0794609	0.375317	protein_coding	CG5815
FBgn0260741	0.23237	0.234767	0.620579	protein_coding	CG3281
FBgn0002909	0.232276	0.130753	0.477423	protein_coding	mus312
FBgn0264691	0.232266	0.178382	0.552681	protein_coding	Lst8
FBgn0030930	0.232203	0.157194	0.521124	protein_coding	Pgant7
FBgn0035964	0.232182	0.159465	0.524313	protein_coding	Dhpr
FBgn0024364	0.232034	0.14448	0.502362	protein_coding	CG11417
FBgn0010531	0.231864	0.177816	0.551994	protein_coding	Ccs
FBgn0037679	0.231851	0.0704338	0.353683	protein_coding	Aduk
FBgn0033233	0.231726	0.230327	0.614588	protein_coding	Kdm4A
FBgn0024251	0.231725	0.0695253	0.351084	protein_coding	bbx
FBgn0034145	0.231699	0.172258	0.546384	protein_coding	CG5065
FBgn0033766	0.231576	0.211817	0.596268	protein_coding	Nup188
FBgn0038470	0.231494	0.375969	0.750288	protein_coding	CG18213
FBgn0031766	0.231343	0.284881	0.670213	protein_coding	CG9117
FBgn0038701	0.231322	0.173374	0.547263	protein_coding	CG18493
FBgn0039868	0.231298	0.348597	0.726041	protein_coding	CG11563
FBgn0035667	0.231089	0.546847	0.849869	protein_coding	Jon65Ai
FBgn0051635	0.230913	0.0801024	0.376579	protein_coding	CG31635
FBgn0035449	0.230882	0.0741394	0.362736	protein_coding	CG14971
FBgn0263051	0.230795	0.22956	0.613354	protein_coding	CG43346
FBgn0028426	0.230707	0.142948	0.50084	protein_coding	RNaseZ
FBgn0259878	0.230668	0.483322	0.818872	protein_coding	Fs
FBgn0043069	0.230597	0.116901	0.452415	protein_coding	MESK4
FBgn0038387	0.230487	0.104791	0.429256	protein_coding	blp
FBgn0013275	0.229766	0.32232	0.703854	protein_coding	Hsp70Aa
FBgn0083120	0.229707	0.414251	0.775721	ncRNA	Uhg8
FBgn0052669	0.229694	0.0477507	0.284433	protein_coding	CG32669
FBgn0030406	0.229672	0.25035	0.635661	protein_coding	CG1463
FBgn0020312	0.229624	0.206204	0.589137	protein_coding	Tmtc3
FBgn0003435	0.229575	0.0766139	0.369762	protein_coding	sm
FBgn0036614	0.229329	0.118037	0.454287	protein_coding	Golgin104
FBgn0034331	0.229084	0.56281	0.857097	protein_coding	BomBc2
FBgn0262517	0.229082	0.0317416	0.226708	protein_coding	Ltn1
FBgn0032120	0.228983	0.0455985	0.27781	protein_coding	CG33298
FBgn0031681	0.228882	0.0828313	0.382672	protein_coding	Pgant5
FBgn0034750	0.228841	0.18448	0.561552	protein_coding	CG3732
FBgn0037921	0.228205	0.398613	0.763987	protein_coding	CG6808
FBgn0038371	0.228091	0.357425	0.732991	protein_coding	Pbp45
FBgn0027358	0.228023	0.220198	0.603036	protein_coding	Tim9b
FBgn0016698	0.227962	0.174775	0.549233	protein_coding	Ptpa
FBgn0030966	0.227956	0.197375	0.578964	protein_coding	shop
FBgn0003511	0.22787	0.221622	0.604103	protein_coding	Sry-beta
FBgn0003301	0.227749	0.270547	0.656788	protein_coding	rut
FBgn0023171	0.227617	0.237034	0.622126	protein_coding	rnh1
FBgn0038275	0.22751	0.281989	0.667429	protein_coding	CG3817
FBgn0053969	0.227449	0.10218	0.423629	protein_coding	CG33969
FBgn0037525	0.227406	0.315512	0.697755	protein_coding	CG17816
FBgn0039229	0.227303	0.0796524	0.375546	protein_coding	Saf-B
FBgn0031951	0.227182	0.247103	0.632463	protein_coding	r2d2
FBgn0030431	0.226961	0.076284	0.369187	protein_coding	CG4407
FBgn0038811	0.226812	0.280863	0.667214	protein_coding	Pus1
FBgn0039404	0.226781	0.287851	0.673332	protein_coding	CG14543
FBgn0086782	0.226674	0.37378	0.747604	protein_coding	amn
FBgn0032790	0.22636	0.133519	0.483485	protein_coding	CG10194
FBgn0033379	0.226317	0.268004	0.654787	protein_coding	Mys45A
FBgn0039233	0.225873	0.3646	0.738533	protein_coding	CG7006
FBgn0026634	0.225822	0.0947527	0.407987	protein_coding	Cog2
FBgn0030611	0.225817	0.196107	0.577487	protein_coding	CG15027
FBgn0035044	0.225803	0.142051	0.498788	protein_coding	CG3663
FBgn0033060	0.22579	0.234984	0.620624	protein_coding	CG7849
FBgn0028853	0.225773	0.368738	0.743507	protein_coding	CG15263
FBgn0061492	0.225641	0.0631629	0.331648	protein_coding	loj
FBgn0014037	0.225586	0.0268701	0.206035	protein_coding	Su(Tpl)
FBgn0033052	0.225567	0.139968	0.495874	protein_coding	SCAP
FBgn0284246	0.225541	0.286068	0.671942	protein_coding	l(2)k09848
FBgn0028494	0.225519	0.142144	0.498933	protein_coding	CG6424
FBgn0015527	0.225314	0.238769	0.624599	protein_coding	peng
FBgn0026439	0.225147	0.288591	0.67408	protein_coding	Eaat1
FBgn0023177	0.22498	0.0749195	0.365319	protein_coding	Pp4-19C
FBgn0031377	0.224979	0.148585	0.508182	protein_coding	CG15356
FBgn0036396	0.224972	0.401359	0.76507	protein_coding	CG17359
FBgn0038897	0.224966	0.249426	0.634892	protein_coding	CG5849
FBgn0051163	0.224945	0.234638	0.62041	protein_coding	SKIP
FBgn0026402	0.224876	0.308178	0.688899	protein_coding	NiPp1
FBgn0261113	0.224859	0.156001	0.51919	protein_coding	Xrp1
FBgn0028533	0.224658	0.298516	0.681999	protein_coding	CG7953
FBgn0051681	0.224638	0.00204271	0.0362062	protein_coding	CG31681
FBgn0031051	0.224591	0.121508	0.460821	protein_coding	Ranbp21
FBgn0032453	0.22444	0.0426381	0.267051	protein_coding	CG6180
FBgn0030876	0.224055	0.1756	0.54973	protein_coding	CG6762
FBgn0033471	0.223915	0.33615	0.71493	protein_coding	CG12134
FBgn0039594	0.223507	0.286636	0.672247	protein_coding	snu
FBgn0027499	0.223489	0.182967	0.558959	protein_coding	wde
FBgn0035656	0.223409	0.413339	0.775102	protein_coding	CG10479
FBgn0030995	0.223256	0.325286	0.70533	protein_coding	CG7914
FBgn0033188	0.22323	0.522981	0.840029	protein_coding	Drat
FBgn0036395	0.223222	0.394979	0.762506	protein_coding	CG17361
FBgn0040262	0.223014	0.27377	0.658995	protein_coding	Ugt37C2
FBgn0034726	0.222786	0.314903	0.697286	protein_coding	Mes4
FBgn0033054	0.222679	0.416946	0.776543	protein_coding	CG14591
FBgn0002641	0.222533	0.268564	0.655295	protein_coding	mal
FBgn0259219	0.222529	0.373285	0.747531	protein_coding	CG42319
FBgn0031389	0.222002	0.338934	0.717733	protein_coding	CG4259
FBgn0037811	0.221815	0.42521	0.783899	protein_coding	CG12592
FBgn0039736	0.221814	0.441065	0.793933	protein_coding	CG7912
FBgn0038548	0.22153	0.294423	0.678756	protein_coding	CG17806
FBgn0043364	0.221516	0.254117	0.639716	protein_coding	cbt
FBgn0041585	0.22144	0.216879	0.600795	protein_coding	olf186-F
FBgn0001276	0.22142	0.255117	0.640391	protein_coding	ix
FBgn0030723	0.221322	0.530608	0.843472	protein_coding	dpr18
FBgn0037540	0.221113	0.328839	0.708687	protein_coding	Pbp95
FBgn0050000	0.221068	0.084451	0.385783	protein_coding	GstT1
FBgn0286051	0.220883	0.276651	0.663438	protein_coding	Rexo5
FBgn0283439	0.220869	0.384015	0.75484	protein_coding	CG46281
FBgn0033454	0.220782	0.273666	0.658909	protein_coding	CG1671
FBgn0040319	0.220727	0.309429	0.690531	protein_coding	Gclc
FBgn0031734	0.220578	0.376187	0.750288	protein_coding	CG11147
FBgn0264446	0.220578	0.371565	0.746151	ncRNA	asRNA:CR43864
FBgn0038235	0.220574	0.320926	0.703109	protein_coding	CG8461
FBgn0011768	0.220396	0.0601522	0.321279	protein_coding	Fdh
FBgn0031052	0.220356	0.144322	0.502178	protein_coding	Elys
FBgn0030484	0.220111	0.149609	0.510592	protein_coding	GstT4
FBgn0039212	0.220007	0.198987	0.581302	protein_coding	Syx18
FBgn0052075	0.219992	0.286802	0.672351	protein_coding	CG32075
FBgn0010356	0.219953	0.132574	0.482346	protein_coding	Taf5
FBgn0033367	0.219852	0.666385	0.89973	protein_coding	PPO2
FBgn0035768	0.219247	0.395908	0.763179	protein_coding	CG14834
FBgn0038733	0.219224	0.396686	0.763551	protein_coding	CG11407
FBgn0027296	0.219061	0.267001	0.653334	protein_coding	temp
FBgn0036838	0.218871	0.295536	0.680059	protein_coding	CG3808
FBgn0000212	0.218681	0.107166	0.433737	protein_coding	brm
FBgn0033216	0.21863	0.181112	0.556831	protein_coding	CG1946
FBgn0051446	0.218532	0.240441	0.625461	protein_coding	CG31446
FBgn0261053	0.218241	0.373578	0.747604	protein_coding	Cad86C
FBgn0051217	0.218239	0.259865	0.645399	protein_coding	modSP
FBgn0035271	0.218042	0.29353	0.678527	protein_coding	CG2021
FBgn0032645	0.217948	0.615442	0.884131	protein_coding	CG15142
FBgn0035854	0.217906	0.328598	0.708687	protein_coding	CG8005
FBgn0267808	0.217884	0.466052	0.80732	ncRNA	asRNA:CR46133
FBgn0037263	0.217822	0.385564	0.755876	protein_coding	slx1
FBgn0260398	0.217777	0.295759	0.680082	protein_coding	Pbp49
FBgn0028506	0.217648	0.440888	0.793764	protein_coding	CG4455
FBgn0032430	0.217605	0.239887	0.625327	protein_coding	CG6388
FBgn0033691	0.21758	0.0853292	0.38861	protein_coding	CG8860
FBgn0036036	0.217437	0.428727	0.785849	protein_coding	CG14174
FBgn0034065	0.217341	0.370714	0.745455	protein_coding	Rrp42
FBgn0028658	0.217263	0.380989	0.753204	protein_coding	Adat1
FBgn0010770	0.217164	0.306396	0.687763	protein_coding	ppan
FBgn0284249	0.216322	0.237464	0.622778	protein_coding	Adf1
FBgn0035520	0.216216	0.274197	0.659197	protein_coding	CG11586
FBgn0033075	0.216047	0.124622	0.467102	NA	NA
FBgn0087041	0.215837	0.367945	0.7427	protein_coding	CG42231
FBgn0033376	0.215805	0.127099	0.473067	protein_coding	CG8777
FBgn0030061	0.21569	0.305233	0.686916	protein_coding	CG1785
FBgn0037710	0.215635	0.0867999	0.391781	protein_coding	CG9393
FBgn0040968	0.215512	0.242341	0.627828	protein_coding	CG14933
FBgn0042213	0.215459	0.289492	0.674725	protein_coding	CG18731
FBgn0038674	0.215424	0.34679	0.724477	protein_coding	CG14285
FBgn0065035	0.215402	0.162475	0.530041	protein_coding	AlkB
FBgn0086895	0.215198	0.0977939	0.412726	protein_coding	pea
FBgn0003480	0.215189	0.385753	0.756092	protein_coding	spn-B
FBgn0043010	0.215171	0.175429	0.549552	protein_coding	Fsn
FBgn0039875	0.215171	0.13776	0.492353	protein_coding	sip3
FBgn0010282	0.215145	0.0775875	0.372572	protein_coding	TfIIFalpha
FBgn0037831	0.21514	0.12857	0.475228	protein_coding	Cap-H2
FBgn0054010	0.214974	0.34063	0.718666	protein_coding	Glyat
FBgn0259721	0.214847	0.195837	0.577082	protein_coding	CG42375
FBgn0260464	0.214847	0.195837	0.577082	protein_coding	CG9288
FBgn0050185	0.214676	0.204503	0.587042	protein_coding	AIMP3
FBgn0016075	0.21467	0.681174	0.906535	protein_coding	vkg
FBgn0022764	0.214572	0.102821	0.425355	protein_coding	Sin3A
FBgn0041709	0.214555	0.445512	0.79509	protein_coding	yellow-g
FBgn0013278	0.214362	0.141685	0.498046	protein_coding	Hsp70Bb
FBgn0031636	0.214328	0.293393	0.678527	protein_coding	CG12194
FBgn0032050	0.214303	0.314122	0.696488	protein_coding	CG13096
FBgn0020412	0.214162	0.0534468	0.301902	protein_coding	JIL-1
FBgn0051648	0.214105	0.19278	0.573437	protein_coding	CG31648
FBgn0033088	0.213929	0.247674	0.63331	protein_coding	PGAP3
FBgn0004427	0.213871	0.17317	0.547263	protein_coding	LysD
FBgn0005694	0.21382	0.147391	0.507203	protein_coding	Aef1
FBgn0034195	0.213815	0.652012	0.895748	protein_coding	Spn53F
FBgn0033569	0.213801	0.282207	0.667429	protein_coding	CG12942
FBgn0261872	0.213616	0.113975	0.448344	protein_coding	scaf6
FBgn0034402	0.213552	0.341294	0.718666	protein_coding	CG15084
FBgn0260648	0.213424	0.340196	0.718666	protein_coding	Rrp40
FBgn0031459	0.213407	0.169548	0.542984	protein_coding	HINT1
FBgn0040890	0.213378	0.22082	0.603628	protein_coding	ksh
FBgn0037213	0.213287	0.225654	0.607855	protein_coding	CG12581
FBgn0038473	0.212661	0.293149	0.678527	protein_coding	Ns1
FBgn0264464	0.212499	0.356028	0.732382	ncRNA	asRNA:CR43872
FBgn0039299	0.212285	0.450059	0.798111	protein_coding	CG11854
FBgn0266083	0.212068	0.202993	0.585582	protein_coding	ocm
FBgn0261786	0.212042	0.114497	0.448967	protein_coding	mi
FBgn0033799	0.212038	0.241704	0.626662	protein_coding	GLaz
FBgn0015600	0.211992	0.216998	0.600795	protein_coding	toc
FBgn0013954	0.21186	0.0870852	0.392098	protein_coding	Fkbp12
FBgn0001218	0.211807	0.32748	0.707879	protein_coding	Hsc70-3
FBgn0039840	0.211645	0.363419	0.737879	protein_coding	pHCl-2
FBgn0051549	0.211567	0.320997	0.703109	protein_coding	CG31549
FBgn0263048	0.211526	0.27894	0.665442	protein_coding	Gpdh3
FBgn0015036	0.211481	0.193317	0.573805	protein_coding	Cyp4ae1
FBgn0037384	0.211424	0.325147	0.70533	protein_coding	dgrn
FBgn0039531	0.211424	0.221115	0.603749	protein_coding	CG5611
FBgn0029148	0.211338	0.346608	0.72441	protein_coding	NHP2
FBgn0259715	0.211114	0.581121	0.865649	protein_coding	CG42369
FBgn0051354	0.211061	0.105588	0.431105	protein_coding	Hsp70Bbb
FBgn0010411	0.211011	0.142828	0.500782	protein_coding	RpS18
FBgn0030270	0.210571	0.541254	0.846943	protein_coding	CG15199
FBgn0035393	0.210568	0.374701	0.748778	protein_coding	CG16753
FBgn0284221	0.210521	0.219032	0.602856	protein_coding	Sema5c
FBgn0040384	0.210253	0.244542	0.630132	protein_coding	CG32795
FBgn0035636	0.210248	0.389604	0.75934	protein_coding	Cralbp
FBgn0003870	0.210077	0.0539166	0.302777	protein_coding	ttk
FBgn0039689	0.209912	0.088506	0.395031	protein_coding	CIA30
FBgn0036939	0.209897	0.318149	0.700891	protein_coding	CG7365
FBgn0028931	0.209856	0.381609	0.753553	protein_coding	CG16863
FBgn0033373	0.209747	0.11961	0.457747	protein_coding	CG8080
FBgn0030008	0.209669	0.436873	0.790543	protein_coding	CG2129
FBgn0031077	0.209642	0.265895	0.652622	protein_coding	THADA
FBgn0031309	0.209285	0.399324	0.76433	protein_coding	Tfb4
FBgn0039670	0.209283	0.323092	0.704356	protein_coding	CG7567
FBgn0037350	0.209275	0.255505	0.640587	protein_coding	CG2911
FBgn0030691	0.209157	0.41942	0.778437	protein_coding	Efhc1.1
FBgn0002948	0.209014	0.423752	0.782118	protein_coding	nod
FBgn0052039	0.208925	0.186326	0.562809	protein_coding	CG32039
FBgn0001186	0.208894	0.306371	0.687763	protein_coding	Hex-A
FBgn0259101	0.208819	0.0778186	0.372686	protein_coding	CG42249
FBgn0284225	0.208791	0.245773	0.631782	protein_coding	CG46309
FBgn0259932	0.208542	0.278118	0.664315	protein_coding	CG42455
FBgn0036996	0.208337	0.347188	0.724993	protein_coding	mag
FBgn0044419	0.208328	0.184294	0.561552	protein_coding	Pmi
FBgn0031879	0.208194	0.136404	0.490056	protein_coding	uif
FBgn0000633	0.208107	0.398565	0.763987	protein_coding	CG17716
FBgn0030768	0.207648	0.298993	0.682135	protein_coding	CG9723
FBgn0051176	0.207642	0.596046	0.8742	protein_coding	CG31176
FBgn0261284	0.207396	0.449817	0.79809	protein_coding	bou
FBgn0027579	0.207161	0.293936	0.678652	protein_coding	mino
FBgn0037144	0.207095	0.20299	0.585582	protein_coding	CG7458
FBgn0038472	0.206949	0.276898	0.663864	protein_coding	CG3995
FBgn0038752	0.206846	0.14807	0.507864	protein_coding	CG4462
FBgn0034893	0.206784	0.180337	0.555515	protein_coding	mRpL43
FBgn0035524	0.206768	0.340083	0.718666	protein_coding	CG11583
FBgn0027526	0.206503	0.168639	0.540935	protein_coding	Ublcp1
FBgn0002543	0.206414	0.285582	0.671128	protein_coding	robo2
FBgn0261618	0.206369	0.0555132	0.307578	protein_coding	larp
FBgn0266674	0.206335	0.141319	0.497978	protein_coding	Sec15
FBgn0038083	0.206279	0.285145	0.67043	protein_coding	Ugt37A3
FBgn0036342	0.206186	0.321058	0.703109	protein_coding	CG11279
FBgn0250871	0.20613	0.224585	0.607042	protein_coding	pot
FBgn0263510	0.206093	0.287434	0.672604	protein_coding	nclb
FBgn0259938	0.20601	0.26375	0.650321	protein_coding	cwo
FBgn0031265	0.205945	0.165136	0.534131	protein_coding	CG2794
FBgn0032921	0.205769	0.370006	0.744978	protein_coding	Mpp6
FBgn0031266	0.205736	0.0474114	0.283747	protein_coding	Sf3b1
FBgn0261535	0.205724	0.381559	0.753553	protein_coding	l(2)34Fd
FBgn0032516	0.205649	0.217772	0.600934	protein_coding	Ing5
FBgn0035323	0.20557	0.266657	0.652932	protein_coding	CG13807
FBgn0011763	0.205442	0.0648734	0.337901	protein_coding	Dp
FBgn0002441	0.205421	0.160754	0.526571	protein_coding	l(3)mbt
FBgn0266579	0.205195	0.208727	0.591886	protein_coding	tau
FBgn0039688	0.205133	0.213576	0.596895	protein_coding	Kul
FBgn0030573	0.205095	0.431489	0.787738	protein_coding	nmdyn-D6
FBgn0038491	0.205093	0.211977	0.596268	protein_coding	CG5292
FBgn0033945	0.204917	0.380544	0.752604	protein_coding	CG12868
FBgn0024947	0.204907	0.0946915	0.407987	protein_coding	NTPase
FBgn0016797	0.204759	0.177172	0.551239	protein_coding	fz2
FBgn0031379	0.204393	0.139599	0.495278	protein_coding	CG7289
FBgn0038766	0.204265	0.475126	0.813274	protein_coding	CG4854
FBgn0034095	0.203936	0.475561	0.813675	protein_coding	CG15701
FBgn0250848	0.203829	0.0634868	0.332804	protein_coding	26-29-p
FBgn0262123	0.203744	0.48997	0.823293	protein_coding	l(2)41Ab
FBgn0004132	0.203626	0.16777	0.539265	protein_coding	boca
FBgn0023520	0.203576	0.272681	0.658702	protein_coding	CG3857
FBgn0011676	0.203569	0.426763	0.785244	protein_coding	Nos
FBgn0011509	0.203527	0.22851	0.611777	protein_coding	SrpRbeta
FBgn0013263	0.203414	0.278122	0.664315	protein_coding	Trl
FBgn0028708	0.203369	0.296248	0.680412	protein_coding	Mst85C
FBgn0266361	0.202869	0.436541	0.790425	ncRNA	asRNA:CR45009
FBgn0035909	0.202818	0.097127	0.411719	protein_coding	ergic53
FBgn0029783	0.202774	0.201929	0.584435	protein_coding	Sirt4
FBgn0264982	0.202544	0.430619	0.787666	ncRNA	lncRNA:CR44133
FBgn0031992	0.202505	0.207109	0.589953	protein_coding	Acbp1
FBgn0032034	0.202198	0.471268	0.810288	protein_coding	Rcd4
FBgn0025832	0.202103	0.423345	0.782052	protein_coding	Fen1
FBgn0029929	0.202064	0.208792	0.591886	protein_coding	CG4593
FBgn0031851	0.202024	0.288401	0.673964	protein_coding	Aatf
FBgn0039929	0.201999	0.287117	0.672598	protein_coding	CG11076
FBgn0003742	0.20158	0.212821	0.596638	protein_coding	tra2
FBgn0037974	0.201553	0.322325	0.703854	protein_coding	CG12224
FBgn0037924	0.201452	0.31184	0.693187	protein_coding	CG14712
FBgn0024993	0.201445	0.468421	0.808655	protein_coding	CG2662
FBgn0004910	0.201394	0.120548	0.459331	protein_coding	Eip63F-1
FBgn0034599	0.201322	0.314065	0.696488	protein_coding	hng1
FBgn0260745	0.201265	0.318824	0.701412	protein_coding	mfas
FBgn0039084	0.201236	0.325949	0.70626	protein_coding	CG10175
FBgn0266619	0.201124	0.384794	0.75545	ncRNA	asRNA:CR45126
FBgn0031868	0.201101	0.153928	0.516065	protein_coding	Rat1
FBgn0038853	0.200813	0.175238	0.549491	protein_coding	RhoGAP93B
FBgn0041627	0.200753	0.414518	0.775721	protein_coding	Ku80
FBgn0044020	0.200444	0.225397	0.607725	protein_coding	Roc2
FBgn0037490	0.200396	0.326138	0.706351	protein_coding	CG10053
FBgn0014032	0.200043	0.255776	0.640587	protein_coding	Sptr
FBgn0021768	0.199899	0.307228	0.688469	protein_coding	nudC
FBgn0031393	0.199886	0.477717	0.814466	protein_coding	CG15382
FBgn0020912	0.199879	0.139258	0.49466	protein_coding	Ptx1
FBgn0024250	0.199763	0.356606	0.732382	protein_coding	brk
FBgn0033365	0.199645	0.223962	0.606185	protein_coding	CG8170
FBgn0034059	0.199644	0.219099	0.602866	protein_coding	CG8320
FBgn0011802	0.199626	0.421473	0.78029	protein_coding	Gem3
FBgn0030067	0.199598	0.374644	0.748778	protein_coding	Rbm13
FBgn0001986	0.199589	0.224887	0.607317	protein_coding	Mtr4
FBgn0086757	0.199443	0.200563	0.582792	protein_coding	cbs
FBgn0051102	0.199391	0.127602	0.473665	protein_coding	CG31102
FBgn0037621	0.199378	0.200616	0.582792	protein_coding	M1BP
FBgn0038326	0.199291	0.0905038	0.400218	protein_coding	CG5044
FBgn0034642	0.199118	0.141626	0.498023	protein_coding	CG15674
FBgn0037073	0.199095	0.277599	0.664191	protein_coding	Tsr1
FBgn0004240	0.198967	0.0221863	0.184523	protein_coding	DptA
FBgn0037882	0.198825	0.43831	0.791493	protein_coding	CG17187
FBgn0021765	0.198793	0.19561	0.57687	protein_coding	scu
FBgn0265541	0.19857	0.470295	0.809999	pseudogene	CR44391
FBgn0036587	0.198543	0.596994	0.874843	protein_coding	CG4950
FBgn0013576	0.198349	0.0961456	0.409908	protein_coding	mtd
FBgn0053144	0.198343	0.0839179	0.385469	protein_coding	CG33144
FBgn0026722	0.198248	0.289632	0.674725	protein_coding	drosha
FBgn0030801	0.198224	0.342346	0.719354	protein_coding	Rcp
FBgn0023216	0.198107	0.165463	0.53435	protein_coding	Parg
FBgn0033749	0.198071	0.420336	0.778955	protein_coding	achi
FBgn0039602	0.198065	0.252412	0.636926	protein_coding	CG1647
FBgn0052707	0.198055	0.35927	0.734604	protein_coding	APC4
FBgn0034168	0.19803	0.479364	0.815803	protein_coding	CG15614
FBgn0038465	0.197998	0.379046	0.751906	protein_coding	Irc
FBgn0039972	0.197961	0.499473	0.826284	protein_coding	Marf1
FBgn0032586	0.197836	0.0475043	0.283845	protein_coding	Tpr2
FBgn0083986	0.197655	0.356784	0.732382	protein_coding	CG34150
FBgn0003512	0.197635	0.14394	0.501936	protein_coding	Sry-delta
FBgn0051467	0.197487	0.429086	0.786358	protein_coding	CG31467
FBgn0020305	0.197352	0.334522	0.713894	protein_coding	dbe
FBgn0261360	0.197162	0.397995	0.763987	protein_coding	CG42637
FBgn0025807	0.197014	0.439986	0.792882	protein_coding	Rad9
FBgn0031631	0.197013	0.547997	0.85071	protein_coding	CG3225
FBgn0035866	0.196928	0.185718	0.562246	protein_coding	Arl5
FBgn0037718	0.196849	0.315565	0.697755	protein_coding	P58IPK
FBgn0038516	0.196779	0.196197	0.577487	protein_coding	P5cr-2
FBgn0011638	0.196772	0.325195	0.70533	protein_coding	La
FBgn0058198	0.196688	0.609842	0.88134	protein_coding	CG40198
FBgn0033348	0.196511	0.48947	0.82283	protein_coding	Spt
FBgn0026061	0.196463	0.337961	0.716779	protein_coding	Mipp1
FBgn0015222	0.196348	0.210659	0.594634	protein_coding	Fer1HCH
FBgn0032517	0.196272	0.228718	0.611993	protein_coding	CG7099
FBgn0027490	0.195848	0.361477	0.735726	protein_coding	D12
FBgn0036211	0.195829	0.184883	0.5616	protein_coding	CG5946
FBgn0024734	0.195807	0.152321	0.513648	protein_coding	PRL-1
FBgn0008636	0.195745	0.445775	0.795413	protein_coding	hbn
FBgn0024991	0.195673	0.349127	0.726285	protein_coding	CG2694
FBgn0028990	0.195605	0.308153	0.688899	protein_coding	Spn27A
[truncated: 7,615 more rows]

## Sheet: Senolytic_OKSM vs. Control
gene_id	log2FoldChange	pvalue	padj	gene_biotype	external_gene_name
FBgn0053346	3.2175	6.96613e-84	6.69723e-80	protein_coding	CG33346
FBgn0052302	2.68479	1.27321e-26	2.0401e-23	protein_coding	CG32302
FBgn0033312	2.65857	5.91989e-17	3.16188e-14	protein_coding	CG8642
FBgn0032362	2.57293	1.54113e-19	1.13972e-16	protein_coding	spz4
FBgn0037786	2.36348	6.534e-20	5.71072e-17	protein_coding	Alp13
FBgn0031116	2.19166	1.00402e-13	3.01647e-11	protein_coding	CG1695
FBgn0004426	2.06886	2.06502e-26	2.83615e-23	pseudogene	LysC
FBgn0030271	2.0555	3.9325e-12	1.02181e-09	protein_coding	CG15202
FBgn0050090	1.91639	3.42211e-19	2.19334e-16	protein_coding	CG30090
FBgn0038020	1.90569	2.36839e-17	1.33939e-14	protein_coding	GstD9
FBgn0032067	1.7957	6.32901e-13	1.73849e-10	protein_coding	LManIV
FBgn0264863	1.74858	6.45752e-10	1.40804e-07	ncRNA	asRNA:CR44054
FBgn0264748	1.74423	6.67406e-14	2.06982e-11	protein_coding	CG44006
FBgn0267084	1.72483	3.28717e-11	7.90071e-09	ncRNA	asRNA:CR45528
FBgn0085452	1.71601	2.62786e-15	9.71703e-13	protein_coding	CG34423
FBgn0031791	1.71353	6.86141e-16	2.99844e-13	protein_coding	AANATL2
FBgn0032549	1.53575	4.2798e-08	7.36589e-06	protein_coding	CG4650
FBgn0029799	1.42846	1.69952e-08	3.20376e-06	protein_coding	CG15772
FBgn0030048	1.39698	9.18543e-20	7.35906e-17	protein_coding	CG12112
FBgn0034860	1.34174	2.93873e-09	5.88603e-07	protein_coding	CG9812
FBgn0004878	1.33517	5.88083e-06	0.000543638	protein_coding	cas
FBgn0037238	1.32654	4.61763e-07	6.16582e-05	protein_coding	CG1090
FBgn0262357	1.31809	3.5089e-14	1.20481e-11	protein_coding	CG43055
FBgn0033372	1.31626	6.59577e-08	1.03954e-05	protein_coding	CG13742
FBgn0030270	1.28765	4.67905e-06	0.000449844	protein_coding	CG15199
FBgn0039678	1.26225	7.4017e-05	0.00423571	protein_coding	Obp99a
FBgn0034497	1.2455	4.20226e-07	5.69022e-05	protein_coding	Mpcp1
FBgn0033921	1.22743	8.12783e-06	0.000691513	protein_coding	tej
FBgn0042206	1.21	2.462e-12	6.5749e-10	protein_coding	GstD10
FBgn0039323	1.18926	6.5906e-10	1.40804e-07	protein_coding	CG10559
FBgn0039475	1.18853	8.72787e-08	1.3319e-05	protein_coding	CG6277
FBgn0266405	1.1875	2.69532e-05	0.00182484	protein_coding	CG45045
FBgn0000276	1.18235	4.86692e-05	0.00304563	protein_coding	CecA1
FBgn0085244	1.1516	3.76906e-06	0.000381429	protein_coding	CG34215
FBgn0010549	1.14849	9.87065e-06	0.000817872	protein_coding	l(2)03659
FBgn0052284	1.13867	5.53478e-06	0.000517647	protein_coding	CG32284
FBgn0019928	1.1368	1.77437e-06	0.000210602	protein_coding	Ser8
FBgn0037230	1.13481	0.00110832	0.0374151	protein_coding	Nepl11
FBgn0039508	1.12577	2.75609e-06	0.000294412	protein_coding	CG3368
FBgn0036956	1.09752	1.66439e-07	2.38827e-05	protein_coding	CG13813
FBgn0030218	1.061	4.43863e-08	7.48648e-06	protein_coding	CG1628
FBgn0264711	1.05879	7.85901e-06	0.000680689	protein_coding	CG43980
FBgn0264987	1.05708	2.45082e-05	0.00169512	ncRNA	lncRNA:CR44138
FBgn0036262	1.05595	0.000276856	0.0124962	protein_coding	CG6910
FBgn0029800	1.05271	1.49862e-07	2.18299e-05	protein_coding	lin-52
FBgn0264341	1.02048	0.000201139	0.00957303	protein_coding	CG43797
FBgn0033108	1.02015	7.74608e-05	0.00438064	protein_coding	CG15236
FBgn0051741	1.0187	1.60899e-05	0.00119722	protein_coding	CG31741
FBgn0033289	1.01408	5.04432e-05	0.00310872	protein_coding	CG2121
FBgn0002732	1.01202	1.9273e-05	0.00139316	protein_coding	E(spl)malpha-BFM
FBgn0038257	0.992529	0.000190521	0.00915833	protein_coding	smp-30
FBgn0036024	0.97648	8.32809e-07	0.000103982	protein_coding	CG18180
FBgn0263974	0.973295	0.00055393	0.0222361	protein_coding	qin
FBgn0033395	0.97088	1.02068e-16	5.16465e-14	protein_coding	Cyp4p2
FBgn0034407	0.969361	0.0123698	0.200207	protein_coding	DptB
FBgn0052011	0.956153	0.000111113	0.00583736	pseudogene	CR32011
FBgn0022355	0.948733	0.00151187	0.046587	protein_coding	Tsf1
FBgn0033458	0.946712	0.00111303	0.0374151	protein_coding	Lime
FBgn0036992	0.945596	0.000263514	0.0120067	protein_coding	Hpd
FBgn0039315	0.931729	1.15774e-06	0.000140893	protein_coding	CG13658
FBgn0039736	0.93046	7.3033e-06	0.000638308	protein_coding	CG7912
FBgn0035355	0.928042	2.40808e-15	9.26053e-13	protein_coding	CG16985
FBgn0044872	0.927583	4.01017e-08	7.13958e-06	protein_coding	FucTC
FBgn0004240	0.926587	4.47804e-06	0.000434868	protein_coding	DptA
FBgn0053965	0.917112	9.69187e-06	0.000817348	protein_coding	CG33965
FBgn0264550	0.913828	0.0012695	0.0413729	ncRNA	lncRNA:CR43929
FBgn0035941	0.908749	4.84153e-05	0.00304563	protein_coding	CG13313
FBgn0000008	0.900757	0.000126445	0.00660676	protein_coding	a
FBgn0039816	0.900542	0.00838594	0.152694	protein_coding	CG11317
FBgn0033798	0.897367	2.53495e-05	0.00174079	protein_coding	CG15870
FBgn0085345	0.897272	2.50201e-06	0.000273344	protein_coding	CG34316
FBgn0036947	0.894946	0.00193258	0.0551329	protein_coding	obst-F
FBgn0032420	0.891021	0.000442368	0.0185717	protein_coding	CG6583
FBgn0265525	0.890033	0.00162738	0.0484385	ncRNA	asRNA:CR44375
FBgn0039642	0.884665	0.000279671	0.0125058	protein_coding	CG11882
FBgn0031267	0.866308	1.62654e-08	3.12751e-06	protein_coding	Ipk2
FBgn0032645	0.862931	0.000833156	0.0306895	protein_coding	CG15142
FBgn0032066	0.860545	8.44113e-05	0.004647	protein_coding	LManIII
FBgn0265498	0.855287	0.000911915	0.0324709	ncRNA	asRNA:CR44367
FBgn0037548	0.85505	5.54584e-06	0.000517647	protein_coding	CG7900
FBgn0040333	0.85212	0.0039379	0.0921142	protein_coding	brv3
FBgn0264907	0.842689	0.109053	0.658978	protein_coding	CG44098
FBgn0043578	0.840536	0.00579482	0.11899	protein_coding	PGRP-SB1
FBgn0030795	0.840268	0.00302766	0.0772093	protein_coding	ppk28
FBgn0028429	0.837135	2.04311e-13	5.7772e-11	protein_coding	I-2
FBgn0015010	0.833017	4.14688e-06	0.000406817	protein_coding	Ag5r
FBgn0267073	0.831169	0.000786288	0.0290745	ncRNA	lncRNA:CR45517
FBgn0005391	0.82734	0.0054354	0.11473	protein_coding	Yp2
FBgn0004045	0.822504	0.0037883	0.0910519	protein_coding	Yp1
FBgn0035666	0.816321	0.000162339	0.00800373	protein_coding	Jon65Aii
FBgn0035356	0.815038	2.57723e-09	5.27182e-07	protein_coding	CG16986
FBgn0259992	0.81503	2.86743e-06	0.00030294	protein_coding	CG42489
FBgn0041709	0.807294	0.00180385	0.052712	protein_coding	yellow-g
FBgn0030590	0.801489	0.00585009	0.119406	protein_coding	CG9518
FBgn0034197	0.800537	0.00398744	0.0925971	protein_coding	Cda9
FBgn0263314	0.800172	0.00914506	0.162515	protein_coding	CG43400
FBgn0029608	0.797361	6.16337e-10	1.37802e-07	protein_coding	CG3091
FBgn0260874	0.796829	0.00147818	0.0456951	protein_coding	Ir76a
FBgn0033592	0.790151	0.00544175	0.11473	protein_coding	CG13215
FBgn0032663	0.786796	0.00110916	0.0374151	protein_coding	CG15153
FBgn0262580	0.777142	1.42883e-07	2.11336e-05	protein_coding	CG43120
FBgn0067903	0.772848	0.000308008	0.0135577	protein_coding	IM18
FBgn0010041	0.77016	0.000499195	0.0203359	protein_coding	GstD5
FBgn0035844	0.76246	0.00392326	0.0921142	protein_coding	CG13676
FBgn0032187	0.759703	2.79843e-10	6.40574e-08	protein_coding	CG4839
FBgn0085736	0.757279	1.0867e-05	0.000863429	protein_coding	CG40472
FBgn0015039	0.756752	6.09821e-08	9.77136e-06	protein_coding	Cyp9b2
FBgn0034582	0.755967	0.000235629	0.0108911	protein_coding	Cht9
FBgn0036906	0.751891	0.00142402	0.0445947	protein_coding	CG14102
FBgn0038498	0.747641	0.00189207	0.0544621	protein_coding	beat-IIa
FBgn0032864	0.742012	8.36984e-05	0.004647	protein_coding	CG2493
FBgn0052205	0.737863	0.0364947	0.389101	ncRNA	hpRNA:CR32205
FBgn0010044	0.736877	0.00326707	0.0813721	protein_coding	GstD8
FBgn0032068	0.736009	0.000865505	0.0314188	protein_coding	LManV
FBgn0260390	0.732847	0.0134108	0.209305	protein_coding	CG42516
FBgn0085265	0.731658	6.6505e-06	0.000586587	protein_coding	CG34236
FBgn0031461	0.728629	0.00466168	0.103266	protein_coding	daw
FBgn0038739	0.725536	7.31347e-07	9.37489e-05	protein_coding	CG4686
FBgn0034782	0.725434	0.00258573	0.0694392	protein_coding	CG12490
FBgn0039474	0.723105	0.000501891	0.0203594	protein_coding	CG6283
FBgn0035699	0.722276	0.00453318	0.101353	protein_coding	CG13300
FBgn0033789	0.719544	0.00161673	0.0484385	protein_coding	CG13324
FBgn0036481	0.718507	0.010445	0.17868	protein_coding	CG16959
FBgn0039776	0.711127	1.47053e-05	0.0011045	protein_coding	PH4alphaEFB
FBgn0033720	0.7097	0.00538538	0.114294	protein_coding	CG13160
FBgn0036023	0.70957	0.00272258	0.072107	protein_coding	CG18179
FBgn0263046	0.705563	0.0109625	0.186317	protein_coding	CG43341
FBgn0259748	0.704002	0.000220032	0.0102689	protein_coding	CG42397
FBgn0038653	0.698857	0.0152955	0.226563	protein_coding	Octalpha2R
FBgn0032839	0.69756	0.00047849	0.0197434	protein_coding	AANATL3
FBgn0040360	0.697053	0.0157944	0.231828	protein_coding	CG14626
FBgn0002543	0.695405	6.42227e-05	0.00376486	protein_coding	robo2
FBgn0030157	0.692808	0.0532186	0.46811	protein_coding	CG1468
FBgn0284223	0.688625	0.00648127	0.12836	protein_coding	CG46307
FBgn0034724	0.686807	0.000129111	0.0066724	protein_coding	babos
FBgn0039319	0.680345	0.000693189	0.0260325	protein_coding	CG13659
FBgn0003390	0.678549	0.00197664	0.0557285	protein_coding	shf
FBgn0031630	0.677756	0.000658506	0.024827	protein_coding	CG15629
FBgn0001224	0.676983	0.206771	0.815025	protein_coding	Hsp23
FBgn0264775	0.675716	0.0360938	0.38902	protein_coding	CG44013
FBgn0030882	0.675162	2.44973e-06	0.00027071	protein_coding	Gss1
FBgn0052495	0.675162	2.44973e-06	0.00027071	protein_coding	Gss2
FBgn0033652	0.674021	0.00677215	0.131544	protein_coding	ths
FBgn0034997	0.671219	0.0199262	0.269817	protein_coding	CG3376
FBgn0037811	0.668481	0.0123628	0.200207	protein_coding	CG12592
FBgn0036648	0.667419	0.00111881	0.0374782	protein_coding	CG4098
FBgn0034156	0.666859	0.0167518	0.240735	protein_coding	CG5348
FBgn0031632	0.665023	0.0131829	0.208275	protein_coding	CG15628
FBgn0266707	0.664019	0.00658479	0.129726	ncRNA	lncRNA:CR45197
FBgn0051446	0.661014	0.000102875	0.00545549	protein_coding	CG31446
FBgn0027538	0.657208	1.61887e-05	0.00119722	protein_coding	beta4GalNAcTA
FBgn0031602	0.656676	1.35825e-05	0.00104466	protein_coding	CG15431
FBgn0036552	0.65473	1.01309e-05	0.000825409	protein_coding	CG17028
FBgn0261681	0.654453	0.0194821	0.265554	protein_coding	CG42728
FBgn0050148	0.653616	0.0191443	0.262184	protein_coding	CG30148
FBgn0267347	0.652332	0.0176261	0.249874	protein_coding	squ
FBgn0032069	0.652037	0.00663287	0.129875	protein_coding	LManVI
FBgn0004635	0.648596	0.03913	0.405435	protein_coding	rho
FBgn0039754	0.646983	0.0183257	0.256281	protein_coding	CG9747
FBgn0050154	0.646085	0.000168671	0.00827348	protein_coding	CG30154
FBgn0053087	0.64207	0.00159506	0.0483752	protein_coding	LRP1
FBgn0039098	0.637358	0.0160375	0.234679	protein_coding	GILT3
FBgn0039310	0.632149	0.00384673	0.0913147	protein_coding	CG11878
FBgn0033820	0.632077	0.156888	0.749292	protein_coding	CG4716
FBgn0001208	0.630007	0.13411	0.70599	protein_coding	Hn
FBgn0034670	0.627902	0.00416459	0.095557	protein_coding	CG13488
FBgn0038180	0.626635	0.0144269	0.219948	protein_coding	Cht5
FBgn0063649	0.62598	0.000866028	0.0314188	protein_coding	CG6006
FBgn0263507	0.623554	0.00577944	0.11899	ncRNA	lncRNA:CR43496
FBgn0050272	0.621511	0.00989818	0.172706	protein_coding	MFS1
FBgn0032940	0.619655	6.23588e-06	0.000562279	protein_coding	Mondo
FBgn0028573	0.615495	0.0146374	0.220917	protein_coding	prc
FBgn0035656	0.613558	0.0120665	0.197325	protein_coding	CG10479
FBgn0035620	0.613525	2.69015e-05	0.00182484	protein_coding	Alp9
FBgn0002733	0.611848	0.00708859	0.135763	protein_coding	E(spl)mbeta-HLH
FBgn0039296	0.611518	0.00478291	0.104984	protein_coding	Sil1
FBgn0266001	0.611226	0.0187759	0.259384	ncRNA	lncRNA:CR44775
FBgn0039687	0.610335	0.00550285	0.115405	protein_coding	Naa40
FBgn0267164	0.608315	0.00574704	0.11899	ncRNA	asRNA:CR45604
FBgn0031837	0.606751	0.0124672	0.200456	protein_coding	DIP-iota
FBgn0030425	0.605925	0.17407	0.776212	protein_coding	Nep6
FBgn0036449	0.605336	0.0044566	0.100577	protein_coding	bmm
FBgn0046687	0.605227	0.00380349	0.0911492	protein_coding	Tre1
FBgn0263768	0.604629	0.00486653	0.106093	ncRNA	lncRNA:CR43685
FBgn0021738	0.601621	0.0399845	0.409975	protein_coding	Crg-1
FBgn0085380	0.60095	0.0106024	0.181051	protein_coding	CG34351
FBgn0033873	0.600014	0.0582907	0.493751	protein_coding	CG6337
FBgn0032161	0.598144	0.00449861	0.100815	protein_coding	CG4594
FBgn0038608	0.59805	0.0143135	0.219124	protein_coding	WRNexo
FBgn0261801	0.597411	0.0110287	0.187002	protein_coding	CG42747
FBgn0002609	0.59669	0.00785036	0.145423	protein_coding	E(spl)m3-HLH
FBgn0259715	0.596209	0.127554	0.698966	protein_coding	CG42369
FBgn0024319	0.592054	0.0122719	0.19997	protein_coding	Nach
FBgn0086704	0.590706	0.00511871	0.109846	protein_coding	stops
FBgn0011591	0.589733	0.0119303	0.196624	protein_coding	fng
FBgn0013278	0.58706	0.148598	0.734679	protein_coding	Hsp70Bb
FBgn0025709	0.584996	0.00188592	0.0544482	protein_coding	CNT2
FBgn0039682	0.584155	0.180541	0.785	protein_coding	Obp99c
FBgn0010452	0.582593	0.0152984	0.226563	protein_coding	trn
FBgn0023416	0.580985	0.120981	0.688497	protein_coding	Ac3
FBgn0261841	0.578266	0.0356314	0.385332	protein_coding	pre-mod(mdg4)-AD
FBgn0001149	0.575588	4.91026e-05	0.00304563	protein_coding	GstD1
FBgn0025680	0.574072	3.91421e-07	5.37589e-05	protein_coding	cry
FBgn0029990	0.572807	0.184208	0.787982	protein_coding	CG2233
FBgn0052195	0.572371	0.00836924	0.152679	protein_coding	CG32195
FBgn0032399	0.572116	0.0436826	0.426793	protein_coding	CG6785
FBgn0023526	0.571018	0.0150999	0.226419	protein_coding	CG2865
FBgn0051809	0.570951	0.0101138	0.175197	protein_coding	CG31809
FBgn0032633	0.56974	0.000653164	0.0247225	protein_coding	Lrch
FBgn0085195	0.56849	0.21309	0.8212	protein_coding	CG34166
FBgn0027608	0.567392	0.0162513	0.236404	protein_coding	CG2082
FBgn0036804	0.5673	0.000991758	0.0340527	protein_coding	Sgf11
FBgn0052667	0.565946	0.201089	0.806528	protein_coding	ssp7
FBgn0031432	0.564623	0.0298591	0.345538	protein_coding	Cyp309a1
FBgn0267652	0.562259	0.053927	0.472611	protein_coding	pre-mod(mdg4)-N
FBgn0001230	0.560924	0.261625	0.867402	protein_coding	Hsp68
FBgn0036833	0.560802	0.00580039	0.11899	protein_coding	CG3819
FBgn0032668	0.560074	0.011891	0.196427	protein_coding	CG17681
FBgn0021764	0.559207	0.000330361	0.0143715	protein_coding	sdk
FBgn0010622	0.558456	2.65285e-06	0.000286567	protein_coding	DCTN3-p24
FBgn0023541	0.557663	0.0092481	0.16344	protein_coding	Cyp4d14
FBgn0052283	0.557333	0.0293418	0.342345	protein_coding	Drsl3
FBgn0037975	0.553373	0.00476267	0.104779	protein_coding	CG3397
FBgn0051354	0.552252	0.134051	0.70599	protein_coding	Hsp70Bbb
FBgn0085232	0.551464	0.638782	0.996426	protein_coding	CG34203
FBgn0263504	0.550809	0.00197248	0.0557285	ncRNA	lncRNA:CR43493
FBgn0000084	0.549376	0.00579128	0.11899	protein_coding	AnxB10
FBgn0031824	0.549252	0.022378	0.289559	protein_coding	CG9547
FBgn0033927	0.548774	0.076237	0.56467	pseudogene	CR10102
FBgn0260857	0.547991	8.00616e-06	0.000687243	protein_coding	Bet1
FBgn0036862	0.547845	0.0239321	0.301551	protein_coding	Gbs-76A
FBgn0029712	0.547469	0.022373	0.289559	protein_coding	CG15912
FBgn0004394	0.546628	0.0246849	0.307809	protein_coding	pdm2
FBgn0035264	0.546008	0.00819606	0.150067	protein_coding	Oseg4
FBgn0034730	0.543369	0.0370225	0.392151	protein_coding	ppk12
FBgn0037746	0.542297	0.0414803	0.414976	protein_coding	CG8478
FBgn0040813	0.538405	0.09564	0.625869	NA	NA
FBgn0033115	0.537364	0.017538	0.249666	protein_coding	Spn42De
FBgn0266362	0.536202	0.00416314	0.095557	ncRNA	lncRNA:CR45010
FBgn0039564	0.535737	0.0515518	0.459332	protein_coding	Nep7
FBgn0020622	0.535427	0.0102597	0.176769	protein_coding	Pi3K21B
FBgn0035669	0.535206	0.106477	0.653298	protein_coding	CG6592
FBgn0263457	0.534362	0.0337704	0.374042	ncRNA	asRNA:CR43480
FBgn0265252	0.534205	0.00752299	0.141262	ncRNA	asRNA:CR44266
FBgn0033234	0.533207	0.0132149	0.208275	protein_coding	MFS12
FBgn0031631	0.531156	0.0368365	0.391322	protein_coding	CG3225
FBgn0031146	0.530978	0.0710316	0.542844	protein_coding	CG15449
FBgn0265901	0.529313	0.00387245	0.091483	ncRNA	asRNA:CR44690
FBgn0036831	0.527878	0.0178822	0.251712	protein_coding	CG6839
FBgn0040837	0.52723	0.0491337	0.450368	protein_coding	CG8620
FBgn0010382	0.527119	0.0262047	0.316498	protein_coding	CycE
FBgn0033446	0.526929	0.000249156	0.0114066	protein_coding	CG1648
FBgn0027500	0.526836	0.0138895	0.213996	protein_coding	spd-2
FBgn0267002	0.524189	0.00118154	0.0389017	protein_coding	unc-104
FBgn0044050	0.523688	0.0144359	0.219948	protein_coding	Ilp3
FBgn0265540	0.523471	0.0405092	0.411252	ncRNA	asRNA:CR44390
FBgn0264776	0.522768	0.00423002	0.0963683	protein_coding	CG44014
FBgn0263093	0.522197	0.0354093	0.385229	pseudogene	CR43361
FBgn0034054	0.520576	0.00196411	0.0557285	protein_coding	CG8366
FBgn0262816	0.520488	0.0112672	0.189265	protein_coding	CG43187
FBgn0034081	0.518165	0.00281448	0.0734028	protein_coding	CG10731
FBgn0026721	0.516805	0.131921	0.70396	protein_coding	fat-spondin
FBgn0004622	0.514582	0.017866	0.251712	protein_coding	TkR99D
FBgn0031633	0.513497	8.5115e-05	0.004647	protein_coding	Fnta
FBgn0029768	0.512881	0.0858704	0.603478	protein_coding	SPR
FBgn0264368	0.511649	0.0665939	0.526594	ncRNA	asRNA:CR43820
FBgn0051469	0.509152	0.00426351	0.0969017	protein_coding	CG31469
FBgn0010385	0.507118	0.0211918	0.27986	protein_coding	Def
FBgn0022772	0.504469	0.0778945	0.569489	NA	NA
FBgn0003068	0.503977	0.00526887	0.11238	protein_coding	per
FBgn0004170	0.503303	0.102899	0.6428	protein_coding	sc
FBgn0032705	0.503147	0.0380619	0.399048	protein_coding	Grip71
FBgn0032034	0.502821	0.0468292	0.442521	protein_coding	Rcd4
FBgn0013277	0.500969	1.03868e-08	2.03793e-06	protein_coding	Hsp70Ba
FBgn0040531	0.500487	0.0424255	0.420387	protein_coding	CG11741
FBgn0261555	0.499902	0.0365379	0.389101	protein_coding	CG42673
FBgn0058469	0.498664	0.0509738	0.456721	ncRNA	lncRNA:CR40469
FBgn0010038	0.498287	0.0412248	0.413711	protein_coding	GstD2
FBgn0039031	0.497478	0.455217	0.958687	protein_coding	Gbp3
FBgn0083984	0.496216	0.0133394	0.209292	protein_coding	CG34148
FBgn0011576	0.494826	0.00396398	0.0922753	protein_coding	Cyp4d2
FBgn0041780	0.494237	0.0241083	0.302581	protein_coding	Ssl2
FBgn0261575	0.492616	0.0755653	0.561432	protein_coding	tobi
FBgn0024288	0.492185	0.0155878	0.230069	protein_coding	Sox100B
FBgn0053265	0.492017	0.000212484	0.0100138	protein_coding	Muc68E
FBgn0035211	0.491931	0.00932199	0.164142	protein_coding	CG2211
FBgn0033301	0.491579	0.00336933	0.0830654	protein_coding	CG12780
FBgn0030357	0.49117	0.0395943	0.407995	protein_coding	Sclp
FBgn0025637	0.490375	4.03005e-06	0.000399431	protein_coding	SkpA
FBgn0036922	0.489996	0.039336	0.406641	protein_coding	CG14182
FBgn0283741	0.489159	0.0133563	0.209292	protein_coding	prage
FBgn0038610	0.488679	0.10867	0.658321	protein_coding	CG7675
FBgn0032780	0.487886	0.000895853	0.0320176	protein_coding	CG13085
FBgn0023214	0.485932	0.0509566	0.456721	protein_coding	edl
FBgn0263973	0.485581	0.0889649	0.611216	protein_coding	jv
FBgn0035557	0.485237	0.192352	0.793181	protein_coding	CG11353
FBgn0264291	0.484528	0.0464369	0.44115	protein_coding	Det
FBgn0032773	0.484394	0.273967	0.876087	protein_coding	fon
FBgn0052082	0.484259	0.134199	0.70599	protein_coding	IRSp53
FBgn0032136	0.484127	0.151833	0.742106	protein_coding	Apoltp
FBgn0027572	0.483503	0.0201197	0.271673	protein_coding	CG5009
FBgn0013307	0.48295	0.277506	0.876193	protein_coding	Odc1
FBgn0034858	0.482901	0.000155795	0.0078011	protein_coding	eIF2Bdelta
FBgn0010226	0.482005	0.0291647	0.340734	protein_coding	GstS1
FBgn0264979	0.481276	0.0667143	0.526594	protein_coding	CG4267
FBgn0264746	0.480792	0.0585938	0.495009	protein_coding	CG44004
FBgn0051989	0.479945	0.0114681	0.191413	protein_coding	Cap-D3
FBgn0033459	0.478823	0.120739	0.688497	protein_coding	CG12744
FBgn0028506	0.478566	0.0623351	0.513083	protein_coding	CG4455
FBgn0030883	0.478123	0.00481807	0.105275	protein_coding	CG7772
FBgn0003483	0.47796	0.132078	0.70396	protein_coding	spn-E
FBgn0053301	0.477802	0.0669695	0.528175	protein_coding	CG33301
FBgn0039945	0.477458	0.00635239	0.126705	protein_coding	CG17159
FBgn0004047	0.477352	0.0920691	0.623123	protein_coding	Yp3
FBgn0035619	0.477081	0.00112318	0.0374938	protein_coding	Alp10
FBgn0028955	0.476842	0.000103276	0.00545549	protein_coding	CG8788
FBgn0031169	0.475839	0.12742	0.698966	protein_coding	CG1494
FBgn0261933	0.475806	0.00266689	0.0711974	protein_coding	SmD1
FBgn0062978	0.475344	0.0050577	0.109059	protein_coding	CG31808
FBgn0266629	0.47407	0.0912768	0.619728	ncRNA	asRNA:CR45136
FBgn0031872	0.473494	0.0943606	0.625869	protein_coding	ihog
FBgn0039449	0.473055	0.10959	0.661395	protein_coding	CG6425
FBgn0030607	0.472852	0.116535	0.681903	protein_coding	dob
FBgn0085227	0.472591	0.00732862	0.138696	protein_coding	CG34198
FBgn0052170	0.470843	0.0319674	0.360721	protein_coding	CG32170
FBgn0037163	0.46975	0.00690151	0.132968	protein_coding	laza
FBgn0043070	0.468443	3.98093e-05	0.00263949	protein_coding	MESK2
FBgn0052856	0.4679	0.0233176	0.296136	protein_coding	CG32856
FBgn0029833	0.46657	2.83257e-05	0.00190436	protein_coding	MCTS1
FBgn0045064	0.46622	0.0372121	0.39314	protein_coding	bwa
FBgn0086350	0.465711	0.0485882	0.450368	protein_coding	tef
FBgn0050277	0.464608	0.00211092	0.0589954	protein_coding	Oatp58Da
FBgn0031801	0.463977	0.0486047	0.450368	protein_coding	CG9498
FBgn0052187	0.463793	0.0718993	0.546435	protein_coding	CG32187
FBgn0032728	0.463254	0.000338263	0.0146489	protein_coding	Tango6
FBgn0263397	0.463041	0.0362376	0.389101	protein_coding	Ih
FBgn0001124	0.462762	0.000605276	0.023655	protein_coding	Got1
FBgn0010473	0.46148	0.101584	0.639612	protein_coding	tutl
FBgn0036300	0.460425	1.44805e-05	0.00109618	protein_coding	Pmm2
FBgn0015399	0.459888	0.0278368	0.330256	protein_coding	kek1
FBgn0050381	0.459702	0.015714	0.231001	protein_coding	PIG-X
FBgn0032004	0.459661	0.114824	0.6752	protein_coding	CG8292
FBgn0086448	0.459477	0.0365056	0.389101	protein_coding	PIG-Q
FBgn0010388	0.458753	0.119152	0.686271	protein_coding	Dro
FBgn0259676	0.458577	0.0448885	0.433726	protein_coding	DNApol-alpha60
FBgn0051176	0.458152	0.354976	0.928636	protein_coding	CG31176
FBgn0027617	0.457669	0.0158673	0.232543	protein_coding	CG5808
FBgn0031305	0.457645	0.317306	0.905586	protein_coding	Iris
FBgn0034247	0.457385	0.0203158	0.273783	protein_coding	CG6484
FBgn0038865	0.456879	0.0874916	0.608203	protein_coding	cDIP
FBgn0034335	0.456495	0.0228961	0.293703	protein_coding	GstE1
FBgn0004003	0.456074	0.0775678	0.568678	protein_coding	wbl
FBgn0040732	0.454766	0.313798	0.902979	protein_coding	CG16926
FBgn0003996	0.454366	0.316159	0.904615	protein_coding	w
FBgn0262107	0.453581	0.146847	0.732159	ncRNA	asRNA:CR42860
FBgn0032338	0.453286	0.0939294	0.625869	protein_coding	CG16854
FBgn0260986	0.45273	0.0545973	0.475926	protein_coding	mei-38
FBgn0028526	0.451539	0.575123	0.990127	protein_coding	CG15293
FBgn0263988	0.451439	0.098017	0.63271	protein_coding	Dic61B
FBgn0030098	0.451077	0.028676	0.337799	protein_coding	CG12057
FBgn0031574	0.450943	0.189375	0.790847	protein_coding	TTLL4B
FBgn0041194	0.450556	0.366378	0.933807	protein_coding	Prat2
FBgn0034605	0.45013	0.00629181	0.126216	protein_coding	Ugt49C1
FBgn0033356	0.449933	0.0161537	0.236021	protein_coding	CG8229
FBgn0064237	0.449499	0.381913	0.935701	protein_coding	Idgf5
FBgn0035770	0.448349	0.00166515	0.0492577	protein_coding	pst
FBgn0038645	0.446773	0.180784	0.785	protein_coding	CG7714
FBgn0000565	0.446187	0.00661352	0.129875	protein_coding	MsrA
FBgn0038799	0.445033	0.0896917	0.613734	protein_coding	MFS9
FBgn0036411	0.444734	0.0415356	0.415097	protein_coding	Sox21a
FBgn0010620	0.444514	0.00792639	0.146265	protein_coding	CG10939
FBgn0024994	0.444488	0.000219126	0.0102689	protein_coding	Ugalt
FBgn0011260	0.443479	0.0211471	0.279654	protein_coding	Sema2a
FBgn0259192	0.443151	0.241417	0.856238	protein_coding	CG42296
FBgn0036232	0.442351	0.0661291	0.524992	protein_coding	CG14125
FBgn0051810	0.442341	0.100794	0.638106	protein_coding	CG31810
FBgn0266445	0.44198	0.0694139	0.536021	protein_coding	CG45075
FBgn0003867	0.440646	0.0922639	0.623123	protein_coding	tsl
FBgn0023479	0.440596	0.180013	0.785	protein_coding	teq
FBgn0260475	0.440196	0.295217	0.889444	protein_coding	CG30059
FBgn0043470	0.439902	0.00288097	0.0743041	protein_coding	lambdaTry
FBgn0063667	0.439605	0.0534455	0.469675	protein_coding	CG32335
FBgn0035708	0.43933	0.0349899	0.383136	protein_coding	axed
FBgn0284229	0.439021	0.0734056	0.552045	protein_coding	CG46313
FBgn0051360	0.438957	0.0133665	0.209292	protein_coding	CG31360
FBgn0265829	0.438097	0.0873881	0.608203	ncRNA	lncRNA:CR44618
FBgn0038071	0.43668	0.032504	0.364636	protein_coding	Dtg
FBgn0036369	0.436572	0.0599714	0.501685	protein_coding	CG10089
FBgn0013279	0.434596	0.414335	0.952323	protein_coding	Hsp70Bc
FBgn0053774	0.430628	0.0151662	0.226419	protein_coding	CG33774
FBgn0261560	0.429336	0.0401298	0.409975	protein_coding	Thor
FBgn0265914	0.429248	0.0890017	0.611216	ncRNA	asRNA:CR44703
FBgn0051089	0.428007	0.0287063	0.337799	protein_coding	CG31089
FBgn0029094	0.427702	0.00998493	0.17359	protein_coding	asf1
FBgn0051324	0.426855	0.0999757	0.636956	protein_coding	CG31324
FBgn0284442	0.426443	0.043393	0.42502	protein_coding	Mcm3
FBgn0052773	0.425346	0.15601	0.749292	ncRNA	lncRNA:CR32773
FBgn0051259	0.4251	0.0267309	0.32074	protein_coding	CG31259
FBgn0265719	0.425028	0.0570947	0.487485	ncRNA	lncRNA:CR44526
FBgn0011674	0.424442	0.00449337	0.100815	protein_coding	insc
FBgn0035868	0.423369	0.0395106	0.407995	protein_coding	CG7194
FBgn0023495	0.422694	0.012512	0.200456	protein_coding	Lip3
FBgn0036848	0.421962	0.00139515	0.0438332	protein_coding	Naxd
FBgn0013276	0.420023	0.735601	0.999511	protein_coding	Hsp70Ab
FBgn0026319	0.418925	0.00750226	0.141148	protein_coding	Traf4
FBgn0030348	0.418503	0.0874069	0.608203	protein_coding	CG10352
FBgn0053468	0.418362	0.0694761	0.53607	protein_coding	CG33468
FBgn0030629	0.418269	0.129533	0.699574	protein_coding	CG9123
FBgn0034394	0.418085	0.035451	0.385229	protein_coding	CG15096
FBgn0030943	0.417987	0.00687143	0.132744	protein_coding	Nup35
FBgn0001223	0.417765	0.539933	0.982256	protein_coding	Hsp22
FBgn0015336	0.41713	9.05102e-05	0.00486126	protein_coding	CG15865
FBgn0035358	0.416872	0.479367	0.96821	protein_coding	CG14949
FBgn0050000	0.416775	0.000366201	0.0155781	protein_coding	GstT1
FBgn0050085	0.416398	0.0452686	0.43461	protein_coding	Rif1
FBgn0030511	0.415944	0.0325522	0.364752	protein_coding	CG11158
FBgn0029825	0.415933	0.0659824	0.524302	protein_coding	CG12728
FBgn0031560	0.414808	0.954806	0.999511	protein_coding	CG16713
FBgn0264892	0.414619	0.0823475	0.590372	ncRNA	asRNA:CR44083
FBgn0035090	0.414258	0.330556	0.913208	protein_coding	CG2736
FBgn0042125	0.414131	0.0298671	0.345538	protein_coding	CG18787
FBgn0033905	0.412667	0.00101485	0.0347214	protein_coding	CG18324
FBgn0259221	0.41212	0.00313046	0.0790193	protein_coding	ATP8A
FBgn0039044	0.411965	0.0337611	0.374042	protein_coding	p53
FBgn0003997	0.411665	0.00586226	0.119406	protein_coding	hid
FBgn0039680	0.411574	0.0646115	0.521875	protein_coding	Cap-D2
FBgn0052017	0.411132	0.0257022	0.313579	protein_coding	CG32017
FBgn0262886	0.410728	0.00509101	0.109497	ncRNA	lncRNA:CR43241
FBgn0035160	0.410351	0.0865113	0.60621	protein_coding	hng3
FBgn0266450	0.409954	0.125608	0.69807	protein_coding	Kr-h1
FBgn0034270	0.408937	0.0349423	0.383051	protein_coding	PIG-A
FBgn0037669	0.407876	0.052637	0.465122	protein_coding	Ibf2
FBgn0039537	0.407764	0.00771655	0.144333	protein_coding	CG5590
FBgn0032059	0.406028	0.0116876	0.193399	protein_coding	PrBP
FBgn0031654	0.405924	0.00378137	0.0910519	protein_coding	Jon25Bii
FBgn0285963	0.405599	0.0550014	0.476752	protein_coding	CG46339
FBgn0033999	0.404843	0.0390424	0.40535	protein_coding	CG8093
FBgn0027083	0.402634	0.0163045	0.236785	protein_coding	MetRS-m
FBgn0013953	0.402557	0.159157	0.754874	protein_coding	Esp
FBgn0030518	0.40217	0.00255439	0.0689828	protein_coding	CG11134
FBgn0028699	0.401772	0.350349	0.925368	protein_coding	Rh50
FBgn0036036	0.401481	0.122553	0.691038	protein_coding	CG14174
FBgn0261387	0.401424	0.000774621	0.0287537	protein_coding	CG17528
FBgn0020906	0.400769	0.0115385	0.192254	protein_coding	Jon25Bi
FBgn0036571	0.400672	0.00191495	0.0549231	protein_coding	Strump
FBgn0003130	0.400454	0.1606	0.756536	protein_coding	Poxn
FBgn0023177	0.400209	0.000495325	0.0202751	protein_coding	Pp4-19C
FBgn0039290	0.399823	0.0513097	0.458023	protein_coding	CG13654
FBgn0032414	0.399435	0.169342	0.768516	protein_coding	CG17211
FBgn0025874	0.398415	0.0188319	0.259384	protein_coding	Meics
FBgn0038156	0.397256	0.24641	0.858221	protein_coding	side-IV
FBgn0063923	0.397117	0.159756	0.756228	protein_coding	Kaz1-ORFB
FBgn0039196	0.396673	0.114769	0.6752	protein_coding	CG17781
FBgn0036545	0.396326	0.0410614	0.413711	protein_coding	GXIVsPLA2
FBgn0013469	0.395456	0.0327538	0.366583	protein_coding	klu
FBgn0054054	0.395157	0.173294	0.774311	protein_coding	CG34054
FBgn0038680	0.394328	0.0237157	0.300004	protein_coding	Cyp12a5
FBgn0037578	0.394216	0.024619	0.307386	protein_coding	CG9601
FBgn0020388	0.393953	0.0066251	0.129875	protein_coding	Gcn5
FBgn0034909	0.393905	0.135145	0.707284	protein_coding	CG4797
FBgn0016698	0.393866	0.0100294	0.174048	protein_coding	Ptpa
FBgn0031689	0.393828	0.0734414	0.552045	protein_coding	Cyp28d1
FBgn0032843	0.393331	0.184314	0.787982	protein_coding	CG10730
FBgn0086368	0.393225	0.282399	0.880211	protein_coding	tw
FBgn0025678	0.393105	0.0021009	0.0588865	protein_coding	CaBP1
FBgn0034430	0.392229	0.037674	0.396653	protein_coding	mip40
FBgn0266457	0.391825	0.141907	0.722746	ncRNA	lncRNA:CR45082
FBgn0020386	0.39177	0.0665262	0.526594	protein_coding	Pdk1
FBgn0039641	0.391753	0.0333137	0.371552	protein_coding	CG14511
FBgn0033321	0.391636	0.243526	0.857083	protein_coding	CG8738
FBgn0038470	0.391423	0.118299	0.684904	protein_coding	CG18213
FBgn0013765	0.390384	0.0862926	0.60556	protein_coding	cnn
FBgn0015376	0.390383	0.0731977	0.551507	protein_coding	cutlet
FBgn0003082	0.389146	0.00138224	0.0436065	protein_coding	phr
FBgn0031888	0.388168	0.154383	0.74808	protein_coding	Pvf2
FBgn0053469	0.388074	0.0336964	0.374042	protein_coding	CG33469
FBgn0051216	0.387993	0.139714	0.716378	protein_coding	Naam
FBgn0036287	0.387851	0.115433	0.677932	protein_coding	CG10663
FBgn0039411	0.387747	0.53028	0.979312	protein_coding	dysf
FBgn0000024	0.38722	0.0351907	0.384459	protein_coding	Ace
FBgn0030777	0.386816	0.0430207	0.424206	protein_coding	CG9672
FBgn0037448	0.386795	0.154956	0.74854	protein_coding	CG15186
FBgn0267650	0.386687	0.127576	0.698966	protein_coding	pre-mod(mdg4)-AA
FBgn0002985	0.386162	0.00310603	0.07879	protein_coding	odd
FBgn0030764	0.386137	0.188508	0.790064	protein_coding	CG9777
FBgn0023530	0.38556	0.0040027	0.0927276	protein_coding	CG3740
FBgn0051866	0.385325	0.0274809	0.327388	protein_coding	Ada1-2
FBgn0002526	0.38432	0.0805546	0.580719	protein_coding	LanA
FBgn0028945	0.384027	0.0874629	0.608203	protein_coding	CG7631
FBgn0051774	0.383447	0.142695	0.72354	protein_coding	fred
FBgn0051549	0.38311	0.0442777	0.430856	protein_coding	CG31549
FBgn0031549	0.383083	0.0877173	0.608959	protein_coding	Spindly
FBgn0037537	0.382875	0.000202949	0.0096116	protein_coding	CG2767
FBgn0038353	0.382845	0.0112803	0.189265	protein_coding	CG5399
FBgn0037941	0.382339	0.145384	0.728763	protein_coding	CG12594
FBgn0035076	0.382285	0.143397	0.725146	protein_coding	Ance-5
FBgn0050083	0.382235	0.21564	0.826292	protein_coding	CG30083
FBgn0036272	0.38208	0.00064059	0.0244635	protein_coding	Sms
FBgn0031195	0.382017	0.0174125	0.248373	protein_coding	CG17600
FBgn0038074	0.381973	0.378372	0.935701	protein_coding	Gnmt
FBgn0085260	0.38124	0.175796	0.777691	protein_coding	CG34231
FBgn0038460	0.38095	0.0632027	0.515816	protein_coding	CG18622
FBgn0015550	0.380886	0.129525	0.699574	protein_coding	tap
FBgn0028952	0.380867	0.0651367	0.523204	protein_coding	Kebab
FBgn0261844	0.380433	0.0482713	0.449255	protein_coding	pre-mod(mdg4)-V
FBgn0035085	0.38011	0.045746	0.43805	protein_coding	CG3770
FBgn0024293	0.379752	0.383933	0.935701	protein_coding	Spn43Ab
FBgn0005654	0.379398	0.123767	0.693383	protein_coding	Orc3
FBgn0262619	0.379291	0.0658248	0.524302	protein_coding	DNAlig1
FBgn0036480	0.378684	0.0256879	0.313579	protein_coding	Cep135
FBgn0035112	0.37828	0.207279	0.815846	protein_coding	CG13877
FBgn0001225	0.377745	0.87381	0.999511	protein_coding	Hsp26
FBgn0267486	0.377184	0.107929	0.657069	protein_coding	Ptp36E
FBgn0264572	0.377169	0.163993	0.762644	ncRNA	asRNA:CR43944
FBgn0000392	0.377107	0.0318387	0.360539	protein_coding	cup
FBgn0035194	0.377036	0.0646032	0.521875	protein_coding	Psf1
FBgn0005664	0.376804	0.0303423	0.347359	protein_coding	Crys
FBgn0036620	0.376696	0.149026	0.734734	protein_coding	CG4842
FBgn0044871	0.37639	0.00276803	0.07271	protein_coding	Gos28
FBgn0262599	0.375986	0.193651	0.794606	protein_coding	SmydA-3
FBgn0263776	0.375814	0.038763	0.404327	protein_coding	CG43693
FBgn0266174	0.375544	0.0597534	0.501282	protein_coding	pre-mod(mdg4)-L
FBgn0283503	0.375397	0.0163357	0.236879	protein_coding	Neurl4
FBgn0031005	0.375112	0.0979647	0.63271	protein_coding	Hs3st-B
FBgn0033788	0.374861	0.0136953	0.212197	protein_coding	CG13323
FBgn0028956	0.374206	0.0184239	0.256281	protein_coding	mthl3
FBgn0039293	0.373623	0.0123983	0.200332	protein_coding	Alg9
FBgn0035271	0.372994	0.0433532	0.42502	protein_coding	CG2021
FBgn0039094	0.372346	0.0756245	0.561432	protein_coding	CG10184
FBgn0283681	0.371985	0.01674	0.240735	protein_coding	Tcs3
FBgn0053012	0.371579	0.265544	0.870423	protein_coding	CG33012
FBgn0035159	0.371308	0.092963	0.62428	protein_coding	CG13896
FBgn0039417	0.369143	0.0984581	0.632956	protein_coding	CG6073
FBgn0038371	0.368785	0.0944107	0.625869	protein_coding	Pbp45
FBgn0036220	0.367656	0.11572	0.678789	protein_coding	CG5897
FBgn0033348	0.36731	0.131254	0.70396	protein_coding	Spt
FBgn0028543	0.367148	0.262463	0.867402	protein_coding	NimB2
FBgn0267035	0.366988	0.101779	0.639612	ncRNA	asRNA:CR45479
FBgn0030230	0.366132	0.128519	0.699574	protein_coding	Rph
FBgn0054031	0.36576	0.570795	0.989118	protein_coding	CG34031
FBgn0264090	0.365188	0.173322	0.774311	protein_coding	CG43759
FBgn0031610	0.364867	0.211626	0.820979	protein_coding	CG15436
FBgn0003353	0.36434	0.160579	0.756536	protein_coding	sei
FBgn0051864	0.364307	0.0319138	0.360539	protein_coding	Qtzl
FBgn0036007	0.36387	0.0187731	0.259384	protein_coding	path
FBgn0031389	0.363841	0.178891	0.782072	protein_coding	CG4259
FBgn0267590	0.36323	0.155783	0.749292	ncRNA	asRNA:CR45928
FBgn0053192	0.362949	0.124529	0.69525	protein_coding	MtnD
FBgn0051326	0.362261	0.253582	0.860397	protein_coding	CG31326
FBgn0020251	0.361261	0.0200524	0.271145	protein_coding	sfl
FBgn0087021	0.361168	0.246469	0.858221	protein_coding	Spc25
FBgn0038652	0.360941	0.0718923	0.546435	protein_coding	CG7720
FBgn0267535	0.360466	0.136854	0.711198	ncRNA	asRNA:CR45875
FBgn0063368	0.360418	0.14117	0.720384	protein_coding	Gpb5
FBgn0038476	0.359585	0.100886	0.638106	protein_coding	kuk
FBgn0034494	0.359035	0.0676629	0.530596	protein_coding	CG10444
FBgn0034354	0.358954	0.0461231	0.4399	protein_coding	GstE11
FBgn0016126	0.358462	0.018517	0.256886	protein_coding	CaMKI
FBgn0030799	0.358399	0.0013834	0.0436065	protein_coding	CG4872
FBgn0284226	0.358111	0.0892133	0.611428	protein_coding	CG46310
FBgn0001112	0.357568	0.762094	0.999511	protein_coding	Gld
FBgn0028940	0.357289	0.0133122	0.209292	protein_coding	Cyp28a5
FBgn0261238	0.357196	0.0431353	0.424394	protein_coding	Alh
FBgn0035985	0.357062	0.217134	0.826721	protein_coding	Cpr67B
FBgn0011834	0.356519	0.127259	0.698966	protein_coding	Ser6
FBgn0015808	0.356489	0.0300278	0.346564	protein_coding	ScpX
FBgn0032681	0.355948	0.107806	0.656811	protein_coding	CG10283
FBgn0003067	0.355632	0.119697	0.687844	protein_coding	Pepck1
FBgn0266488	0.355632	0.119697	0.687844	protein_coding	CG45087
FBgn0039836	0.355557	0.104857	0.649131	protein_coding	CG1750
FBgn0040091	0.355448	0.289182	0.886043	protein_coding	Ugt317A1
FBgn0035286	0.354994	0.108693	0.658321	protein_coding	CG13924
FBgn0037251	0.354837	0.07313	0.551429	protein_coding	CG9804
FBgn0034511	0.354811	0.156874	0.749292	protein_coding	GNBP-like3
FBgn0051915	0.354185	0.135672	0.708566	protein_coding	CG31915
FBgn0037560	0.353538	0.00415936	0.095557	pseudogene	CR18228
FBgn0044047	0.353259	0.243064	0.857083	protein_coding	Ilp6
FBgn0038672	0.353136	0.0204372	0.274801	protein_coding	CG6005
FBgn0053198	0.353058	0.0934451	0.625869	protein_coding	pen-2
FBgn0085412	0.352946	0.0487877	0.450368	protein_coding	kmr
FBgn0034756	0.352444	0.0961523	0.625869	protein_coding	Cyp6d2
FBgn0029769	0.352352	0.285037	0.882707	protein_coding	frma
FBgn0250820	0.351966	0.00143564	0.0448125	protein_coding	meigo
FBgn0032120	0.351783	0.000861707	0.0314188	protein_coding	CG33298
FBgn0027553	0.35165	0.0254999	0.312301	protein_coding	NELF-B
FBgn0051163	0.351203	0.060806	0.504426	protein_coding	SKIP
FBgn0040099	0.351128	0.20596	0.813851	protein_coding	lectin-28C
FBgn0284221	0.350772	0.0249201	0.308342	protein_coding	Sema5c
FBgn0051091	0.35066	0.111069	0.663366	protein_coding	CG31091
FBgn0005648	0.350538	0.0616431	0.510014	protein_coding	Pabp2
FBgn0051976	0.350443	0.178199	0.780859	protein_coding	ovm
FBgn0050021	0.350252	0.213759	0.822031	protein_coding	metro
FBgn0031649	0.349387	0.293997	0.889444	protein_coding	hoe2
FBgn0050187	0.349286	0.183784	0.787982	protein_coding	CG30187
FBgn0001090	0.348	0.874507	0.999511	protein_coding	bnb
FBgn0031961	0.346809	0.121696	0.689328	protein_coding	CG7102
FBgn0030964	0.345167	0.0833165	0.594658	protein_coding	Pvf1
FBgn0038391	0.34454	0.0959688	0.625869	protein_coding	GATAe
FBgn0037387	0.344462	0.0482576	0.449255	protein_coding	CG1213
FBgn0262962	0.344354	0.169457	0.768516	protein_coding	CG43273
FBgn0031690	0.344172	0.345029	0.920645	protein_coding	CG7742
FBgn0035166	0.3435	0.0212331	0.28002	protein_coding	JMJD5
FBgn0024432	0.342932	0.00094873	0.0334106	protein_coding	Dlc90F
FBgn0035644	0.342833	0.221205	0.833008	protein_coding	DNApol-epsilon58
FBgn0051674	0.342732	0.0181073	0.254507	protein_coding	CG31674
FBgn0035964	0.342499	0.0229335	0.293703	protein_coding	Dhpr
FBgn0032782	0.342422	0.0238926	0.301449	protein_coding	Rab9
FBgn0040528	0.342306	0.234174	0.847324	protein_coding	CG15864
FBgn0033365	0.342143	0.700568	0.998219	protein_coding	CG8170
FBgn0050343	0.341914	0.180877	0.785	protein_coding	Tsen15
FBgn0036806	0.341821	0.0763661	0.564757	protein_coding	Cyp12c1
FBgn0030060	0.341497	0.0828365	0.591672	protein_coding	CG2004
FBgn0027903	0.340701	0.104156	0.647291	protein_coding	Pol31
FBgn0041182	0.340545	0.0171903	0.245568	protein_coding	Tep2
FBgn0031484	0.339959	0.0165662	0.23914	protein_coding	CG3165
FBgn0262717	0.339764	0.167167	0.768013	protein_coding	Skeletor
FBgn0053307	0.33975	0.517658	0.976463	protein_coding	CG33307
FBgn0052791	0.339352	0.236338	0.848677	protein_coding	DIP-alpha
FBgn0034523	0.339297	0.239077	0.854963	protein_coding	Nnf1a
FBgn0051961	0.338764	0.0162537	0.236404	protein_coding	TBCC
FBgn0052091	0.338245	0.183357	0.786816	protein_coding	CG32091
FBgn0032877	0.337799	0.176097	0.777691	protein_coding	CG2617
FBgn0037338	0.337221	0.0975027	0.631239	protein_coding	Snm1
FBgn0030612	0.337197	0.00574318	0.11899	protein_coding	CG5599
FBgn0263106	0.337061	0.331399	0.913508	protein_coding	DnaJ-1
FBgn0038815	0.337008	0.220901	0.832841	protein_coding	CG5466
FBgn0016975	0.336962	0.10609	0.652976	protein_coding	stnB
FBgn0016976	0.336962	0.10609	0.652976	protein_coding	stnA
FBgn0259878	0.336533	0.418672	0.952363	protein_coding	Fs
FBgn0041184	0.336349	0.207877	0.816542	protein_coding	Socs36E
FBgn0024232	0.336328	0.148781	0.734679	protein_coding	gprs
FBgn0037533	0.335976	0.0163879	0.237182	protein_coding	CD98hc
FBgn0004228	0.335788	0.000560845	0.0223212	protein_coding	mex1
FBgn0011297	0.335378	0.00286729	0.0743041	protein_coding	Alg3
FBgn0026570	0.33436	0.0342827	0.377542	protein_coding	CG5704
FBgn0004395	0.334059	0.0870364	0.607826	protein_coding	unk
FBgn0052506	0.33398	0.129166	0.699574	protein_coding	tbc
FBgn0000246	0.333827	0.118995	0.686271	protein_coding	c(3)G
FBgn0030217	0.333682	0.0957929	0.625869	protein_coding	CG2124
FBgn0033450	0.33362	0.133107	0.704518	protein_coding	Lsm11
FBgn0033122	0.332611	0.0539795	0.47264	protein_coding	CG17002
FBgn0032482	0.332577	0.152589	0.744137	protein_coding	Pect
FBgn0261791	0.332331	0.0491052	0.450368	protein_coding	SNRPG
FBgn0017577	0.332168	0.0938093	0.625869	protein_coding	Mcm5
FBgn0032086	0.331587	0.123725	0.693383	protein_coding	CG17906
FBgn0036029	0.331308	0.264492	0.869639	protein_coding	CG16719
FBgn0030929	0.331088	0.0689767	0.535557	protein_coding	CG15043
FBgn0036964	0.330909	0.0511844	0.45733	protein_coding	FRG1
FBgn0027095	0.330734	0.00137139	0.0435829	protein_coding	Manf
FBgn0030310	0.330662	0.245408	0.857945	protein_coding	PGRP-SA
FBgn0001114	0.33039	0.495005	0.973007	protein_coding	Glt
FBgn0270926	0.330271	0.539031	0.982209	protein_coding	AsnS
FBgn0032178	0.330093	0.452384	0.957468	protein_coding	Spn31A
FBgn0036951	0.329963	0.00332286	0.0823349	protein_coding	CG7017
FBgn0040373	0.329839	0.194435	0.797141	protein_coding	CG3038
FBgn0063494	0.329617	0.101165	0.639451	protein_coding	GstE6
FBgn0051648	0.329572	0.0261492	0.316224	protein_coding	CG31648
FBgn0052985	0.328972	0.290138	0.886562	protein_coding	CG32985
FBgn0267972	0.328163	0.0356062	0.385332	protein_coding	Der-1
FBgn0268063	0.327963	0.261908	0.867402	protein_coding	ltl
FBgn0034500	0.327667	0.0725266	0.548813	protein_coding	CG11200
FBgn0004911	0.327513	0.427336	0.954146	ncRNA	asRNA:Eig63F-2
FBgn0051633	0.3272	0.0400826	0.409975	protein_coding	CG31633
FBgn0010300	0.327061	0.0878554	0.609311	protein_coding	brat
FBgn0005624	0.32698	0.0626204	0.514119	protein_coding	Psc
FBgn0267727	0.326493	0.12074	0.688497	protein_coding	Pen
FBgn0038490	0.326185	0.249995	0.859297	protein_coding	CG5285
FBgn0037405	0.325512	0.0195008	0.265554	protein_coding	CG1077
FBgn0261929	0.32537	0.183071	0.786705	protein_coding	5-HT2B
FBgn0033778	0.325138	0.117757	0.684142	protein_coding	Balat
FBgn0025595	0.324866	0.526615	0.97897	protein_coding	AkhR
FBgn0034331	0.323888	0.182525	0.786705	protein_coding	BomBc2
FBgn0011335	0.323831	0.0443791	0.431406	protein_coding	vers
FBgn0031909	0.32348	0.0317626	0.360485	protein_coding	CG5181
FBgn0028434	0.323281	0.236489	0.848677	protein_coding	Ercc1
FBgn0041225	0.323168	0.274578	0.876087	protein_coding	Gr94a
FBgn0259233	0.32296	0.235119	0.847406	protein_coding	CG42331
FBgn0038039	0.322937	0.00420802	0.0960948	protein_coding	CG5196
FBgn0004861	0.322538	0.00526337	0.11238	protein_coding	ph-p
FBgn0029648	0.322258	0.0459689	0.438873	protein_coding	CG3603
FBgn0004374	0.322252	0.0503006	0.453649	protein_coding	neb
FBgn0050151	0.322146	0.174024	0.776212	protein_coding	CG30151
FBgn0051183	0.32125	0.0557827	0.479691	protein_coding	CG31183
FBgn0033584	0.321217	0.071479	0.545396	protein_coding	CG7737
FBgn0051159	0.321169	0.0433983	0.42502	protein_coding	mRRF2
FBgn0267733	0.320923	0.0529461	0.466932	ncRNA	lncRNA:CR46064
FBgn0264753	0.320554	0.163828	0.762644	protein_coding	Rgk1
FBgn0259730	0.320451	0.226887	0.839552	protein_coding	tal-1A
FBgn0259731	0.320451	0.226887	0.839552	protein_coding	tal-2A
FBgn0259732	0.320451	0.226887	0.839552	protein_coding	tal-3A
FBgn0259733	0.320451	0.226887	0.839552	protein_coding	tal-AA
[truncated: 8,923 more rows]

## Sheet: OKSM vs. Senolytic
gene_id	log2FoldChange	pvalue	padj	gene_biotype	external_gene_name
[truncated: 9,614 more rows]

[truncated: 16 more sheets: OKSM vs. Senolytic_OKSM, Senolytic vs. Senolytic_OKSM, C1 GO, C1 KEGG, C2 GO, C2 KEGG, C3 GO, C3 KEGG, C4 GO, C4 KEGG, C5 GO, C5 KEGG, C6 GO, C6 KEGG, C7 GO, C7 KEGG]
