# Supplementary material for: Combining stem cell rejuvenation and senescence targeting to synergistically extend lifespan
Source: Aging (Albany NY). 2022 Oct 25;14(20):8270–91. doi: 10.18632/aging.204347 (PMC9648810; doi:10.18632/aging.204347)
Supplement: Supplementary Table 2 [file aging-14-204347-s003.xlsx]

## Sheet: LRT
Supplementary Table 2. Differential expression analysis results for ISC-restricted expression model.
gene_id	pvalue	padj	gene_biotype	external_gene_name	Cluster
FBgn0000003	0.612965	0.734567	ncRNA	7SLRNA:CR32864	NA
FBgn0000008	2.10423e-10	4.81652e-09	protein_coding	a	1
FBgn0000014	0.543211	0.677458	protein_coding	abd-A	NA
FBgn0000015	0.645855	0.759609	protein_coding	Abd-B	NA
FBgn0000017	0.306736	0.457648	protein_coding	Abl	NA
FBgn0000018	0.488281	0.631149	protein_coding	abo	NA
FBgn0000024	0.00257545	0.0102132	protein_coding	Ace	2
FBgn0000032	0.0873353	0.180448	protein_coding	Acph-1	NA
FBgn0000042	0.0014694	0.00636787	protein_coding	Act5C	1
FBgn0000043	2.43328e-08	3.61854e-07	protein_coding	Act42A	1
FBgn0000044	1.03586e-06	1.06658e-05	protein_coding	Act57B	1
FBgn0000045	0.120329	0.229571	protein_coding	Act79B	NA
FBgn0000046	1.35996e-06	1.35402e-05	protein_coding	Act87E	1
FBgn0000052	0.442035	0.589569	protein_coding	Pfas	NA
FBgn0000053	0.00213304	0.0087447	protein_coding	Gart	3
FBgn0000055	0.182679	0.314767	protein_coding	Adh	NA
FBgn0000056	0.425224	0.574034	protein_coding	Adhr	NA
FBgn0000057	0.0946638	0.191564	protein_coding	adp	NA
FBgn0000063	0.884816	0.922861	protein_coding	Mps1	NA
FBgn0000064	7.54422e-05	0.000492007	protein_coding	Ald1	2
FBgn0000075	3.44935e-05	0.000245717	protein_coding	amd	2
FBgn0000077	0.659606	0.77015	protein_coding	amx	NA
FBgn0000078	0.0190071	0.0540521	protein_coding	Amy-d	4
FBgn0000079	0.0194036	0.0548456	protein_coding	Amy-p	1
FBgn0000083	0.00213093	0.00873992	protein_coding	AnxB9	1
FBgn0000084	4.77968e-21	7.83112e-19	protein_coding	AnxB10	1
FBgn0000097	0.00409039	0.0150751	protein_coding	aop	1
FBgn0000100	6.39207e-10	1.33249e-08	protein_coding	RpLP0	5
FBgn0000108	0.137879	0.254779	protein_coding	Appl	NA
FBgn0000109	1.38912e-05	0.000108522	protein_coding	Aprt	4
FBgn0000114	0.0490425	0.115455	protein_coding	bru1	NA
FBgn0000115	0.85258	0.900808	protein_coding	Arl1	NA
FBgn0000116	0.54339	0.677458	protein_coding	Argk	NA
FBgn0000117	0.513479	0.6519	protein_coding	arm	NA
FBgn0000119	0.0316844	0.0817406	protein_coding	arr	5
FBgn0000120	1.55796e-25	4.84993e-23	protein_coding	Arr1	6
FBgn0000121	0.00370939	0.0138679	protein_coding	Arr2	5
FBgn0000139	0.00269566	0.0106222	protein_coding	ash2	5
FBgn0000140	0.209579	0.348141	protein_coding	asp	NA
FBgn0000146	0.235734	0.378723	protein_coding	aub	NA
FBgn0000147	0.344837	0.496214	protein_coding	aurA	NA
FBgn0000150	0.851727	0.900416	protein_coding	awd	NA
FBgn0000152	0.361037	0.51281	protein_coding	Axs	NA
FBgn0000153	8.27182e-05	0.000533498	protein_coding	b	5
FBgn0000163	0.0379279	0.0947083	protein_coding	baz	1
FBgn0000173	0.148079	0.269153	protein_coding	ben	NA
FBgn0000180	0.000392498	0.00208033	protein_coding	bib	7
FBgn0000181	1.26697e-05	9.98503e-05	protein_coding	bic	5
FBgn0000182	0.369148	0.521397	protein_coding	BicC	NA
FBgn0000183	1.0272e-05	8.2841e-05	protein_coding	BicD	1
FBgn0000212	0.16916	0.296618	protein_coding	brm	NA
FBgn0000221	0.899663	0.932514	protein_coding	brn	NA
FBgn0000228	0.171866	0.300404	protein_coding	Bsg25D	NA
FBgn0000229	0.0545364	0.125385	protein_coding	bsk	NA
FBgn0000239	0.115372	0.222569	protein_coding	bur	NA
FBgn0000241	9.57496e-11	2.3719e-09	protein_coding	bw	4
FBgn0000244	0.62024	0.740435	protein_coding	by	NA
FBgn0000246	0.494333	0.63569	protein_coding	c(3)G	NA
FBgn0000247	0.297264	0.447334	protein_coding	ca	NA
FBgn0000250	0.838492	0.891572	protein_coding	cact	NA
FBgn0000251	0.320182	0.471043	protein_coding	cad	NA
FBgn0000253	0.0889992	0.183035	protein_coding	Cam	NA
FBgn0000256	0.00129541	0.00571732	protein_coding	capu	7
FBgn0000257	0.361554	0.51331	protein_coding	car	NA
FBgn0000259	0.454691	0.600957	protein_coding	CkIIbeta	NA
FBgn0000261	0.717792	0.810478	protein_coding	Cat	NA
FBgn0000273	0.476827	0.621333	protein_coding	Pka-C1	NA
FBgn0000276	0.0112669	0.0352973	protein_coding	CecA1	4
FBgn0000283	3.99057e-06	3.56631e-05	protein_coding	Cp190	5
FBgn0000286	0.165852	0.292851	protein_coding	Cf2	NA
FBgn0000289	0.00360439	0.0135295	protein_coding	cg	5
FBgn0000299	0.0123016	0.0379283	protein_coding	Col4a1	6
FBgn0000307	0.00514075	0.0183172	protein_coding	chif	7
FBgn0000308	7.38162e-11	1.87329e-09	protein_coding	chic	1
FBgn0000316	0.843824	0.895102	protein_coding	cin	NA
FBgn0000317	0.0610679	0.136536	protein_coding	ck	NA
FBgn0000318	0.0222663	0.0616132	protein_coding	cl	1
FBgn0000319	0.00760023	0.0254365	protein_coding	Chc	7
FBgn0000326	0.0116605	0.036275	protein_coding	clt	4
FBgn0000330	0.0471789	0.112113	protein_coding	cm	NA
FBgn0000339	3.63678e-05	0.000257693	protein_coding	cni	4
FBgn0000346	0.727664	0.817571	protein_coding	comt	NA
FBgn0000352	0.03454	0.0875594	protein_coding	cos	2
FBgn0000355	0.00262972	0.0103974	protein_coding	Cp15	4
FBgn0000357	0.0192791	0.0546255	protein_coding	Cp18	7
FBgn0000359	0.802634	0.868374	protein_coding	Cp36	NA
FBgn0000360	0.672151	0.779198	protein_coding	Cp38	NA
FBgn0000370	7.81606e-09	1.29652e-07	protein_coding	crc	5
FBgn0000376	0.013809	0.0418935	protein_coding	crm	5
FBgn0000377	0.988916	0.993724	protein_coding	crn	NA
FBgn0000382	0.0680583	0.148712	protein_coding	csw	NA
FBgn0000384	0.849124	0.898988	protein_coding	cta	NA
FBgn0000392	0.304097	0.454467	protein_coding	cup	NA
FBgn0000394	0.81132	0.874324	protein_coding	cv	NA
FBgn0000395	6.20139e-06	5.24116e-05	protein_coding	cv-2	7
FBgn0000404	0.00822055	0.027147	protein_coding	CycA	1
FBgn0000405	0.709805	0.80517	protein_coding	CycB	NA
FBgn0000406	0.144334	0.263422	protein_coding	Cyt-b5-r	NA
FBgn0000412	0.947154	0.965382	protein_coding	D1	NA
FBgn0000414	0.963824	0.977217	protein_coding	Dab	NA
FBgn0000416	0.411559	0.560566	protein_coding	Sap-r	NA
FBgn0000422	5.54931e-15	3.0307e-13	protein_coding	Ddc	6
FBgn0000426	0.337375	0.488791	protein_coding	SmF	NA
FBgn0000442	0.347756	0.499337	protein_coding	Pkg21D	NA
FBgn0000447	2.63416e-05	0.000192642	protein_coding	Dhod	6
FBgn0000448	0.00995402	0.0318649	protein_coding	Hr3	1
FBgn0000449	3.7629e-07	4.34385e-06	protein_coding	dib	5
FBgn0000451	0.803345	0.869042	protein_coding	ect	NA
FBgn0000454	0.0425455	0.103844	protein_coding	Dip-B	NA
FBgn0000455	0.0089467	0.0291228	protein_coding	Dip-C	4
FBgn0000459	0.394932	0.545845	protein_coding	disco	NA
FBgn0000463	7.31726e-08	9.81837e-07	protein_coding	Dl	7
FBgn0000464	0.332851	0.484114	protein_coding	Lar	NA
FBgn0000473	4.45535e-16	3.03711e-14	protein_coding	Cyp6a2	6
FBgn0000477	0.0362356	0.0910912	protein_coding	DNaseII	4
FBgn0000479	7.43971e-05	0.000485531	protein_coding	dnc	5
FBgn0000482	0.957145	0.972663	protein_coding	dor	NA
FBgn0000489	0.211359	0.349979	protein_coding	Pka-C3	NA
FBgn0000490	0.0576781	0.130742	protein_coding	dpp	NA
FBgn0000499	0.50282	0.642993	protein_coding	dsh	NA
FBgn0000504	0.914218	0.941955	protein_coding	dsx	NA
FBgn0000520	0.244475	0.388226	protein_coding	dwg	NA
FBgn0000524	0.196466	0.332211	protein_coding	dx	NA
FBgn0000533	0.332281	0.483511	protein_coding	ea	NA
FBgn0000536	0.000539177	0.00273216	protein_coding	eas	1
FBgn0000541	0.00271749	0.0106992	protein_coding	E(bx)	5
FBgn0000542	0.00231641	0.00937303	protein_coding	ec	6
FBgn0000543	0.12335	0.233901	protein_coding	ecd	NA
FBgn0000546	0.00291767	0.0113723	protein_coding	EcR	5
FBgn0000547	0.989575	0.99426	protein_coding	ed	NA
FBgn0000557	1.9448e-06	1.86091e-05	protein_coding	eEF1alpha2	2
FBgn0000559	7.46195e-11	1.88854e-09	protein_coding	eEF2	5
FBgn0000562	0.520349	0.658207	protein_coding	egl	NA
FBgn0000565	0.00613779	0.0212299	protein_coding	MsrA	4
FBgn0000566	0.0121004	0.0374564	protein_coding	Eip55E	4
FBgn0000567	0.00400318	0.0147887	protein_coding	Eip74EF	7
FBgn0000568	0.244406	0.388182	protein_coding	Eip75B	NA
FBgn0000575	0.645896	0.759609	protein_coding	emc	NA
FBgn0000578	1.95009e-06	1.86305e-05	protein_coding	ena	1
FBgn0000579	0.144235	0.263333	protein_coding	Eno	NA
FBgn0000581	0.00210241	0.00864395	protein_coding	E(Pc)	5
FBgn0000588	0.762845	0.840912	protein_coding	esc	NA
FBgn0000592	0.0013473	0.00591836	protein_coding	Est-6	7
FBgn0000611	0.052704	0.122044	protein_coding	exd	NA
FBgn0000615	0.148981	0.270319	protein_coding	exu	NA
FBgn0000617	0.858375	0.904679	protein_coding	e(y)1	NA
FBgn0000618	0.0184188	0.0527494	protein_coding	e(y)2	4
FBgn0000629	0.0105107	0.0333536	protein_coding	E(z)	5
FBgn0000633	0.339595	0.491245	protein_coding	CG17716	NA
FBgn0000635	1.04901e-08	1.67464e-07	protein_coding	Fas2	1
FBgn0000636	0.00161311	0.0069073	protein_coding	Fas3	7
FBgn0000644	0.492886	0.634993	protein_coding	Fcp3C	NA
FBgn0000659	0.0288649	0.0757642	protein_coding	fkh	7
FBgn0000662	0.180782	0.312248	protein_coding	fl(2)d	NA
FBgn0000667	0.0478197	0.11329	protein_coding	Actn	NA
FBgn0000709	0.0104329	0.0331403	protein_coding	fliI	7
FBgn0000711	0.000144762	0.000877876	protein_coding	flw	1
FBgn0000719	0.000807209	0.00385405	protein_coding	fog	7
FBgn0000721	3.67903e-08	5.24557e-07	protein_coding	for	6
FBgn0000723	5.70448e-05	0.00038382	protein_coding	FER	5
FBgn0000810	0.23612	0.379083	protein_coding	fs(1)K10	NA
FBgn0000927	0.787787	0.857776	protein_coding	fs(1)Ya	NA
FBgn0000996	0.0254596	0.0684222	protein_coding	dup	1
FBgn0001075	0.0879193	0.181454	protein_coding	ft	NA
FBgn0001078	0.00465615	0.0168281	protein_coding	ftz-f1	5
FBgn0001079	0.602555	0.726098	protein_coding	fu	NA
FBgn0001084	0.133131	0.248374	protein_coding	fy	NA
FBgn0001085	0.0183825	0.0526931	protein_coding	fz	3
FBgn0001086	0.214372	0.354026	protein_coding	fzy	NA
FBgn0001087	0.00349399	0.0132107	protein_coding	g	2
FBgn0001089	0.149929	0.271608	protein_coding	Gal	NA
FBgn0001090	0.722291	0.813693	protein_coding	bnb	NA
FBgn0001091	0.532565	0.668319	protein_coding	Gapdh1	NA
FBgn0001092	0.256466	0.402273	protein_coding	Gapdh2	NA
FBgn0001098	0.204526	0.341938	protein_coding	Gdh	NA
FBgn0001099	0.796712	0.86437	protein_coding	gdl	NA
FBgn0001104	2.42024e-12	8.46541e-11	protein_coding	Galphai	1
FBgn0001105	2.44285e-08	3.62698e-07	protein_coding	Gbeta13F	1
FBgn0001108	0.0288572	0.0757642	protein_coding	DCTN1-p150	1
FBgn0001112	0.896166	0.930439	protein_coding	Gld	NA
FBgn0001114	0.0556644	0.127258	protein_coding	Glt	NA
FBgn0001122	0.00377607	0.014089	protein_coding	Galphao	1
FBgn0001123	0.189189	0.323124	protein_coding	Galphas	NA
FBgn0001124	1.70256e-06	1.658e-05	protein_coding	Got1	1
FBgn0001125	0.317591	0.468208	protein_coding	Got2	NA
FBgn0001128	0.10368	0.205141	protein_coding	Gpdh1	NA
FBgn0001133	0.837753	0.890887	protein_coding	grau	NA
FBgn0001134	0.0800526	0.168837	protein_coding	Grd	NA
FBgn0001137	0.801104	0.867582	protein_coding	grk	NA
FBgn0001139	0.0181631	0.0521924	protein_coding	gro	5
FBgn0001142	1.28872e-05	0.000101307	protein_coding	Gs1	6
FBgn0001145	1.48805e-09	2.9073e-08	protein_coding	Gs2	6
FBgn0001149	8.24244e-59	1.09966e-55	protein_coding	GstD1	1
FBgn0001168	0.0146865	0.0439043	protein_coding	h	4
FBgn0001169	0.0312645	0.0809029	protein_coding	H	2
FBgn0001170	0.172383	0.301233	protein_coding	H2.0	NA
FBgn0001179	0.161675	0.287762	protein_coding	hay	NA
FBgn0001180	0.243868	0.387693	protein_coding	hb	NA
FBgn0001185	0.0515851	0.119929	protein_coding	her	NA
FBgn0001186	4.29762e-06	3.78994e-05	protein_coding	Hex-A	1
FBgn0001187	0.421669	0.570309	protein_coding	Hex-C	NA
FBgn0001189	0.0210284	0.0586923	protein_coding	hfw	4
FBgn0001197	0.0169222	0.0492468	protein_coding	His2Av	7
FBgn0001202	0.0102544	0.0327069	protein_coding	hook	1
FBgn0001206	0.207113	0.345113	protein_coding	Hmr	NA
FBgn0001208	0.131896	0.246454	protein_coding	Hn	NA
FBgn0001215	0.300855	0.451239	protein_coding	Hrb98DE	NA
FBgn0001216	0.076749	0.1629	protein_coding	Hsc70-1	NA
FBgn0001217	1.84291e-05	0.00014004	protein_coding	Hsc70-2	4
FBgn0001218	3.11827e-09	5.67672e-08	protein_coding	Hsc70-3	2
FBgn0001220	0.215122	0.354888	protein_coding	Hsc70-5	NA
FBgn0001222	0.46532	0.611543	protein_coding	Hsf	NA
FBgn0001223	1.41609e-10	3.35657e-09	protein_coding	Hsp22	4
FBgn0001224	3.58363e-11	9.56214e-10	protein_coding	Hsp23	4
FBgn0001225	4.04254e-09	7.10984e-08	protein_coding	Hsp26	4
FBgn0001226	0.000533392	0.00270578	protein_coding	Hsp27	4
FBgn0001228	0.00863939	0.0282702	protein_coding	CG4456	1
FBgn0001230	1.45486e-09	2.84841e-08	protein_coding	Hsp68	4
FBgn0001233	0.738659	0.825379	protein_coding	Hsp83	NA
FBgn0001234	0.354837	0.506159	ncRNA	lncRNA:Hsromega	NA
FBgn0001235	0.0831459	0.174259	protein_coding	hth	NA
FBgn0001247	0.689954	0.791874	protein_coding	Ide	NA
FBgn0001248	0.00561235	0.0197415	protein_coding	Idh	2
FBgn0001250	0.760852	0.840004	protein_coding	if	NA
FBgn0001255	0.684557	0.788282	protein_coding	ImpE3	NA
FBgn0001257	8.48434e-07	9.00401e-06	protein_coding	ImpL2	4
FBgn0001258	0.0321189	0.0826786	protein_coding	Ldh	7
FBgn0001259	0.617981	0.738597	protein_coding	in	NA
FBgn0001276	0.675479	0.781697	protein_coding	ix	NA
FBgn0001280	0.919513	0.94582	protein_coding	janA	NA
FBgn0001285	0.0891252	0.183088	protein_coding	Jon44E	NA
FBgn0001291	0.0392121	0.0973165	protein_coding	Jra	7
FBgn0001296	0.0775124	0.164132	protein_coding	kar	NA
FBgn0001297	0.344156	0.495846	protein_coding	kay	NA
FBgn0001301	0.0143165	0.0430972	protein_coding	kel	7
FBgn0001308	0.00923069	0.0299117	protein_coding	Khc	1
FBgn0001316	0.0479601	0.113507	protein_coding	klar	NA
FBgn0001320	0.0046407	0.0167929	protein_coding	kni	6
FBgn0001321	0.605874	0.728969	protein_coding	knk	NA
FBgn0001323	0.00362963	0.0136105	protein_coding	knrl	6
FBgn0001324	0.408452	0.557875	protein_coding	kto	NA
FBgn0001330	0.0524545	0.121677	protein_coding	kz	NA
FBgn0001341	0.11126	0.21638	protein_coding	Mybbp1A	NA
FBgn0001404	0.0472643	0.112259	protein_coding	egh	NA
FBgn0001491	0.0155994	0.0459861	protein_coding	l(1)10Bb	1
FBgn0001565	0.00292103	0.0113807	protein_coding	Hlc	5
FBgn0001612	0.276643	0.424231	protein_coding	Grip91	NA
FBgn0001624	0.675784	0.781751	protein_coding	dlg1	NA
FBgn0001941	5.915e-06	5.02184e-05	protein_coding	ifc	1
FBgn0001942	1.18341e-11	3.63525e-10	protein_coding	eIF4A	5
FBgn0001961	4.16265e-08	5.85466e-07	protein_coding	Arpc1	1
FBgn0001965	0.81022	0.87348	protein_coding	Sos	NA
FBgn0001970	0.0467638	0.111325	protein_coding	Pgant35A	NA
FBgn0001977	0.000736967	0.00355687	protein_coding	CIAPIN1	1
FBgn0001978	0.268973	0.415298	protein_coding	stc	NA
FBgn0001981	0.0424773	0.103738	protein_coding	esg	NA
FBgn0001986	2.41861e-05	0.000178415	protein_coding	Mtr4	6
FBgn0001987	1.26191e-10	3.00638e-09	protein_coding	Gli	7
FBgn0001989	0.470462	0.61596	protein_coding	ND-B17	NA
FBgn0001990	0.687066	0.789821	protein_coding	wek	NA
FBgn0001991	0.408483	0.557875	protein_coding	Ca-alpha1D	NA
FBgn0001992	0.768278	0.844383	protein_coding	Cyp303a1	NA
FBgn0001994	0.387226	0.53798	protein_coding	crp	NA
FBgn0001995	0.084347	0.176105	protein_coding	mRpL4	NA
FBgn0002021	0.135086	0.251059	protein_coding	l(2)37Bb	NA
FBgn0002022	1.12093e-05	8.97805e-05	protein_coding	Catsup	6
FBgn0002023	3.5425e-07	4.11485e-06	protein_coding	Lim3	2
FBgn0002031	0.532214	0.667967	protein_coding	l(2)37Cc	NA
FBgn0002036	0.0802207	0.169039	protein_coding	CG10561	NA
FBgn0002044	0.549121	0.682038	protein_coding	swm	NA
FBgn0002069	0.00903478	0.029389	protein_coding	AspRS	7
FBgn0002121	0.00392024	0.0145398	protein_coding	l(2)gl	7
FBgn0002174	5.71239e-07	6.29104e-06	protein_coding	CG5504	5
FBgn0002183	0.095238	0.19235	protein_coding	dre4	NA
FBgn0002283	0.571396	0.700849	protein_coding	l(3)73Ah	NA
FBgn0002284	0.00439724	0.0160163	protein_coding	Prosbeta6	1
FBgn0002306	0.0012209	0.00544689	protein_coding	sas	6
FBgn0002354	0.898574	0.931873	protein_coding	l(3)87Df	NA
FBgn0002413	0.00212921	0.00873669	protein_coding	dco	7
FBgn0002431	0.296019	0.446107	protein_coding	hyd	NA
FBgn0002441	0.392689	0.543773	protein_coding	l(3)mbt	NA
FBgn0002466	0.000103298	0.000650945	protein_coding	sti	1
FBgn0002521	0.0017091	0.00725841	protein_coding	pho	1
FBgn0002522	0.000154999	0.000933891	protein_coding	lab	2
FBgn0002524	0.543724	0.677461	protein_coding	lace	NA
FBgn0002525	0.234327	0.377048	protein_coding	Lam	NA
FBgn0002526	1.8655e-10	4.3471e-09	protein_coding	LanA	1
FBgn0002542	0.0303749	0.0789731	protein_coding	lds	4
FBgn0002543	3.18463e-08	4.60392e-07	protein_coding	robo2	7
FBgn0002552	0.00973159	0.0312851	protein_coding	lin	5
FBgn0002564	0.0709395	0.153596	protein_coding	Lsp1gamma	NA
FBgn0002565	0.863788	0.908531	protein_coding	Lsp2	NA
FBgn0002566	0.665946	0.774207	protein_coding	lt	NA
FBgn0002567	0.00528209	0.0187279	protein_coding	Rab32	6
FBgn0002569	2.44299e-09	4.58134e-08	protein_coding	Mal-A2	4
FBgn0002570	0.000284921	0.00158197	protein_coding	Mal-A1	1
FBgn0002571	4.18512e-07	4.76645e-06	protein_coding	Mal-A3	4
FBgn0002578	0.00136231	0.0059643	protein_coding	Kaz-m1	5
FBgn0002579	4.50135e-13	1.83573e-11	protein_coding	RpL36	5
FBgn0002590	5.87219e-11	1.52334e-09	protein_coding	RpS5a	5
FBgn0002593	3.17588e-11	8.57212e-10	protein_coding	RpLP1	5
FBgn0002609	0.000361833	0.00193537	protein_coding	E(spl)m3-HLH	7
FBgn0002622	3.10646e-10	6.95712e-09	protein_coding	RpS3	5
FBgn0002626	5.72675e-10	1.20455e-08	protein_coding	RpL32	5
FBgn0002638	0.585611	0.712298	protein_coding	Rcc1	NA
FBgn0002641	7.81644e-08	1.04581e-06	protein_coding	mal	1
FBgn0002643	0.00248828	0.00992865	protein_coding	mam	5
FBgn0002645	3.82197e-14	1.8494e-12	protein_coding	Map205	7
FBgn0002673	0.103213	0.20452	protein_coding	twe	NA
FBgn0002707	0.245086	0.388931	protein_coding	mei-9	NA
FBgn0002709	0.102206	0.20275	protein_coding	mei-218	NA
FBgn0002715	0.804198	0.869423	protein_coding	mei-S332	NA
FBgn0002716	0.63218	0.749895	protein_coding	mei-W68	NA
FBgn0002719	0.000288071	0.00159329	protein_coding	Men	4
FBgn0002723	0.0870288	0.179974	protein_coding	Met	NA
FBgn0002732	3.20188e-11	8.6174e-10	protein_coding	E(spl)malpha-BFM	7
FBgn0002733	0.000850852	0.00403863	protein_coding	E(spl)mbeta-HLH	7
FBgn0002736	0.0327492	0.083954	protein_coding	mago	1
FBgn0002772	0.0226591	0.0625022	protein_coding	Mlc1	3
FBgn0002773	5.98869e-05	0.00040006	protein_coding	Mlc2	3
FBgn0002774	0.429966	0.578429	protein_coding	mle	NA
FBgn0002775	0.132685	0.24773	protein_coding	msl-3	NA
FBgn0002778	0.141686	0.259962	protein_coding	mnd	NA
FBgn0002780	0.00040448	0.00213414	protein_coding	mod	5
FBgn0002781	0.341777	0.494019	protein_coding	mod(mdg4)	NA
FBgn0002783	0.0908839	0.185969	protein_coding	mor	NA
FBgn0002787	0.0497305	0.116809	protein_coding	Rpn8	NA
FBgn0002789	0.00217295	0.00887326	protein_coding	Mp20	1
FBgn0002791	0.502337	0.642667	protein_coding	mr	NA
FBgn0002868	1.2993e-13	5.77816e-12	protein_coding	MtnA	2
FBgn0002869	0.41145	0.560545	protein_coding	MtnB	NA
FBgn0002872	0.293647	0.443248	protein_coding	mu2	NA
FBgn0002873	0.0231475	0.0636557	protein_coding	mud	1
FBgn0002878	0.046352	0.11057	protein_coding	mus101	NA
FBgn0002887	0.488495	0.631252	protein_coding	mus201	NA
FBgn0002891	0.00187139	0.00784969	protein_coding	DNApol-zeta	1
FBgn0002899	0.134588	0.250431	protein_coding	mus301	NA
FBgn0002901	0.801253	0.867582	protein_coding	mus304	NA
FBgn0002905	0.857711	0.904262	protein_coding	DNApol-theta	NA
FBgn0002906	0.300945	0.451239	protein_coding	Blm	NA
FBgn0002909	0.248675	0.393319	protein_coding	mus312	NA
FBgn0002914	0.00781663	0.0260495	protein_coding	Myb	5
FBgn0002921	0.598657	0.722754	protein_coding	Atpalpha	NA
FBgn0002922	0.10501	0.207294	protein_coding	nau	NA
FBgn0002924	0.0655839	0.144369	protein_coding	ncd	NA
FBgn0002930	0.0694581	0.150994	protein_coding	nec	NA
FBgn0002931	0.000402792	0.00212644	protein_coding	net	6
FBgn0002932	0.198407	0.334342	protein_coding	neur	NA
FBgn0002939	3.90193e-42	3.03667e-39	protein_coding	ninaD	6
FBgn0002940	0.000275423	0.0015393	protein_coding	ninaE	5
FBgn0002945	0.118556	0.227257	protein_coding	nkd	NA
FBgn0002948	0.702857	0.800584	protein_coding	nod	NA
FBgn0002973	0.00389264	0.0144546	protein_coding	numb	7
FBgn0002985	0.015541	0.0458715	protein_coding	odd	6
FBgn0002989	0.923588	0.948668	protein_coding	okr	NA
FBgn0003008	0.00867232	0.0283584	protein_coding	or	4
FBgn0003015	0.203726	0.340906	protein_coding	osk	NA
FBgn0003016	0.243479	0.387368	protein_coding	osp	NA
FBgn0003023	0.0338775	0.0862781	protein_coding	otu	7
FBgn0003028	0.240583	0.384333	protein_coding	ovo	NA
FBgn0003041	2.86415e-07	3.39015e-06	protein_coding	pbl	1
FBgn0003042	0.578306	0.706541	protein_coding	Pc	NA
FBgn0003044	0.52965	0.666072	protein_coding	Pcl	NA
FBgn0003046	4.97522e-23	1.01008e-20	protein_coding	Pcp	3
FBgn0003048	0.0345115	0.087511	protein_coding	pcx	1
FBgn0003053	0.275013	0.422216	protein_coding	peb	NA
FBgn0003062	5.24094e-05	0.000356224	protein_coding	Fib	5
FBgn0003067	0.637813	0.754087	protein_coding	Pepck1	NA
FBgn0003068	0.325899	0.476899	protein_coding	per	NA
FBgn0003071	0.196711	0.332416	protein_coding	Pfk	NA
FBgn0003074	0.00117201	0.00527233	protein_coding	Pgi	5
FBgn0003076	0.314921	0.465945	protein_coding	Pgm1	NA
FBgn0003079	0.483429	0.627484	protein_coding	Raf	NA
FBgn0003082	1.91141e-05	0.000144189	protein_coding	phr	7
FBgn0003090	0.268509	0.414822	protein_coding	pk	NA
FBgn0003091	0.983658	0.990446	protein_coding	Pkc53E	NA
FBgn0003093	0.474532	0.619595	protein_coding	Pkc98E	NA
FBgn0003116	0.373262	0.525935	protein_coding	pn	NA
FBgn0003118	0.000452562	0.00235721	protein_coding	pnt	7
FBgn0003124	0.0596001	0.134186	protein_coding	polo	NA
FBgn0003130	0.40342	0.553561	protein_coding	Poxn	NA
FBgn0003134	0.747034	0.831334	protein_coding	Pp1alpha-96A	NA
FBgn0003137	0.0051332	0.0182973	protein_coding	Ppn	1
FBgn0003139	0.000139101	0.000849619	protein_coding	PpV	6
FBgn0003141	0.379814	0.531956	protein_coding	pr	NA
FBgn0003149	0.0118931	0.0368758	protein_coding	Prm	1
FBgn0003159	0.000715914	0.0034714	protein_coding	CG2841	6
FBgn0003162	4.74384e-05	0.000327683	protein_coding	Pu	6
FBgn0003165	0.0738174	0.158296	protein_coding	pum	NA
FBgn0003169	0.68524	0.788626	protein_coding	put	NA
FBgn0003175	0.0201145	0.0565129	protein_coding	px	5
FBgn0003187	0.609711	0.73217	protein_coding	qua	NA
FBgn0003189	0.00810117	0.0268249	protein_coding	r	5
FBgn0003204	0.0295979	0.0772935	protein_coding	ras	5
FBgn0003205	5.19145e-07	5.7994e-06	protein_coding	Ras85D	1
FBgn0003206	0.0247476	0.0670101	protein_coding	Ras64B	1
FBgn0003209	0.31049	0.461216	protein_coding	raw	NA
FBgn0003210	0.385994	0.536908	protein_coding	rb	NA
FBgn0003218	0.976472	0.986401	protein_coding	rdgB	NA
FBgn0003227	0.984846	0.991215	protein_coding	rec	NA
FBgn0003231	3.1493e-12	1.08529e-10	protein_coding	ref(2)P	1
FBgn0003256	0.59084	0.716047	protein_coding	rl	NA
FBgn0003257	0.0896165	0.18394	protein_coding	r-l	NA
FBgn0003261	0.000633201	0.00313379	protein_coding	Rm62	5
FBgn0003268	0.173779	0.30335	protein_coding	rod	NA
FBgn0003274	1.78706e-06	1.72411e-05	protein_coding	RpLP2	6
FBgn0003275	0.416332	0.56571	protein_coding	RpII18	NA
FBgn0003277	2.327e-06	2.18411e-05	protein_coding	RpII215	5
FBgn0003278	0.00434872	0.0158767	protein_coding	RpI135	5
FBgn0003279	4.76279e-16	3.19998e-14	protein_coding	RpL4	5
FBgn0003301	1.54541e-05	0.000119975	protein_coding	rut	5
FBgn0003302	0.898645	0.931873	protein_coding	rux	NA
FBgn0003308	0.00136835	0.00598185	protein_coding	ry	3
FBgn0003310	0.00907026	0.0294736	protein_coding	S	7
FBgn0003317	0.63066	0.749044	protein_coding	sax	NA
FBgn0003321	6.32669e-05	0.000419042	protein_coding	sbr	5
FBgn0003328	3.01809e-09	5.52161e-08	NA	NA	1
FBgn0003330	0.634535	0.751353	protein_coding	Sce	NA
FBgn0003334	0.00184891	0.00776741	protein_coding	Scm	5
FBgn0003345	0.000283154	0.00157403	protein_coding	sd	7
FBgn0003346	0.000943029	0.00440128	protein_coding	RanGAP	1
FBgn0003353	0.434817	0.583022	protein_coding	sei	NA
FBgn0003356	7.96663e-06	6.56667e-05	protein_coding	Jon99Cii	5
FBgn0003357	0.000139284	0.00085018	protein_coding	Jon99Ciii	5
FBgn0003358	0.119427	0.228411	protein_coding	Jon99Ci	NA
FBgn0003360	0.506388	0.64606	protein_coding	sesB	NA
FBgn0003366	0.67398	0.780446	protein_coding	sev	NA
FBgn0003371	0.000342703	0.00184955	protein_coding	sgg	1
FBgn0003380	0.447899	0.594457	protein_coding	Sh	NA
FBgn0003386	0.0398299	0.09864	protein_coding	Shaw	3
FBgn0003388	0.656168	0.767144	protein_coding	shd	NA
FBgn0003390	0.000391865	0.00207816	protein_coding	shf	5
FBgn0003391	0.000293243	0.00161793	protein_coding	shg	1
FBgn0003392	0.0292433	0.0766067	protein_coding	shi	1
FBgn0003396	0.443744	0.591257	protein_coding	shn	NA
FBgn0003401	0.0293209	0.0767671	protein_coding	shu	4
FBgn0003410	0.472005	0.617386	protein_coding	sina	NA
FBgn0003415	0.654754	0.766355	protein_coding	skd	NA
FBgn0003416	0.611017	0.733428	protein_coding	sl	NA
FBgn0003423	0.644047	0.758195	protein_coding	slgA	NA
FBgn0003429	5.06729e-13	2.0398e-11	protein_coding	slo	5
FBgn0003435	0.107988	0.211426	protein_coding	sm	NA
FBgn0003444	0.00321809	0.0123576	protein_coding	smo	6
FBgn0003447	0.0204252	0.0572826	protein_coding	sn	2
FBgn0003449	0.716039	0.809314	protein_coding	snf	NA
FBgn0003459	0.74993	0.833023	protein_coding	stwl	NA
FBgn0003460	0.369609	0.521811	protein_coding	so	NA
FBgn0003462	5.18521e-06	4.47962e-05	protein_coding	Sod1	6
FBgn0003463	0.00657657	0.0225887	protein_coding	sog	2
FBgn0003464	0.0032719	0.0125128	protein_coding	sol	7
FBgn0003475	0.00527282	0.0187164	protein_coding	spir	5
FBgn0003479	0.876593	0.917666	protein_coding	spn-A	NA
FBgn0003480	0.848228	0.898446	protein_coding	spn-B	NA
FBgn0003483	0.0142391	0.0429797	protein_coding	spn-E	1
FBgn0003495	0.0829492	0.173983	protein_coding	spz	NA
FBgn0003499	0.408001	0.557572	protein_coding	sr	NA
FBgn0003502	0.000709926	0.00344595	protein_coding	Btk29A	5
FBgn0003507	2.29675e-07	2.75699e-06	protein_coding	srp	5
FBgn0003510	0.415246	0.564481	protein_coding	Sry-alpha	NA
FBgn0003511	0.192741	0.32787	protein_coding	Sry-beta	NA
FBgn0003512	0.177352	0.308099	protein_coding	Sry-delta	NA
FBgn0003514	6.26185e-08	8.56214e-07	protein_coding	sqh	1
FBgn0003515	0.273903	0.420858	protein_coding	st	NA
FBgn0003517	2.83937e-16	2.02419e-14	protein_coding	sta	5
FBgn0003520	0.0523776	0.121529	protein_coding	stau	NA
FBgn0003525	0.675944	0.781751	protein_coding	stg	NA
FBgn0003545	0.00710391	0.0240114	protein_coding	sub	1
FBgn0003557	0.641215	0.756753	protein_coding	Su(dx)	NA
FBgn0003559	0.618936	0.739256	protein_coding	su(f)	NA
FBgn0003567	0.561819	0.692559	protein_coding	su(Hw)	NA
FBgn0003575	0.815187	0.876674	protein_coding	su(sable)	NA
FBgn0003598	0.286422	0.435155	protein_coding	Su(var)3-7	NA
FBgn0003607	0.0290752	0.0762521	protein_coding	Su(var)205	3
FBgn0003612	0.540267	0.67499	protein_coding	Su(var)2-10	NA
FBgn0003638	2.17087e-06	2.05408e-05	protein_coding	su(w[a])	5
FBgn0003651	0.256538	0.402319	protein_coding	svp	NA
FBgn0003654	7.87826e-06	6.50531e-05	protein_coding	sw	1
FBgn0003655	0.111373	0.216509	protein_coding	swa	NA
FBgn0003656	2.11361e-05	0.000157786	protein_coding	sws	1
FBgn0003660	1.08348e-08	1.72378e-07	protein_coding	Syb	1
FBgn0003676	0.00210226	0.00864395	protein_coding	CCT1	7
FBgn0003687	0.633431	0.750627	protein_coding	Tbp	NA
FBgn0003701	0.108322	0.211902	protein_coding	thr	NA
FBgn0003714	0.0605392	0.135679	protein_coding	tko	NA
FBgn0003716	0.000627357	0.00310651	protein_coding	tkv	5
FBgn0003721	7.41209e-06	6.14756e-05	protein_coding	Tm1	1
FBgn0003731	0.0464403	0.110724	protein_coding	Egfr	NA
FBgn0003741	0.756038	0.837045	protein_coding	tra	NA
FBgn0003742	0.960686	0.974988	protein_coding	tra2	NA
FBgn0003744	0.000601184	0.00299278	protein_coding	trc	7
FBgn0003748	0.263598	0.409352	protein_coding	Treh	NA
FBgn0003862	0.00323316	0.0123914	protein_coding	trx	5
FBgn0003866	0.846007	0.896907	protein_coding	tsh	NA
FBgn0003867	0.0516499	0.119975	protein_coding	tsl	NA
FBgn0003870	0.554178	0.685947	protein_coding	ttk	NA
FBgn0003882	0.194736	0.330181	protein_coding	tub	NA
FBgn0003884	2.81701e-05	0.000204732	protein_coding	alphaTub84B	1
FBgn0003885	0.0604897	0.135603	protein_coding	alphaTub84D	NA
FBgn0003888	2.1438e-13	9.26897e-12	protein_coding	betaTub60D	1
FBgn0003890	0.0887707	0.182767	protein_coding	betaTub97EF	NA
FBgn0003891	9.77269e-06	7.9225e-05	protein_coding	tud	5
FBgn0003892	0.140317	0.258007	protein_coding	ptc	NA
FBgn0003896	0.000163653	0.0009816	protein_coding	tup	2
FBgn0003941	2.42301e-10	5.46582e-09	protein_coding	RpL40	5
FBgn0003942	4.78196e-10	1.03076e-08	protein_coding	RpS27A	5
FBgn0003943	4.01442e-07	4.60573e-06	protein_coding	Ubi-p63E	1
FBgn0003944	0.265287	0.411001	protein_coding	Ubx	NA
FBgn0003961	0.129237	0.242486	protein_coding	Uro	NA
FBgn0003963	0.190069	0.324033	protein_coding	ush	NA
FBgn0003964	0.0599249	0.134631	protein_coding	usp	NA
FBgn0003969	7.51998e-07	8.03537e-06	protein_coding	vap	1
FBgn0003977	0.0315736	0.0814997	protein_coding	vir	2
FBgn0003978	0.68636	0.789205	protein_coding	vls	NA
FBgn0003984	0.00110926	0.00504354	protein_coding	vn	1
FBgn0003996	0.000110576	0.000690066	protein_coding	w	1
FBgn0003997	0.106697	0.209736	protein_coding	hid	NA
FBgn0004003	0.359575	0.511122	protein_coding	wbl	NA
FBgn0004045	0.189937	0.323934	protein_coding	Yp1	NA
FBgn0004047	0.433871	0.582006	protein_coding	Yp3	NA
FBgn0004049	0.0432613	0.104858	protein_coding	yrt	NA
FBgn0004050	0.401202	0.551429	protein_coding	z	NA
FBgn0004055	0.000883082	0.004161	protein_coding	uzip	6
FBgn0004057	2.12911e-07	2.57562e-06	protein_coding	Zw	2
FBgn0004066	8.75828e-05	0.000560999	protein_coding	Prosalpha4	1
FBgn0004087	0.0442427	0.106705	protein_coding	Dhfr	NA
FBgn0004101	0.79665	0.86437	protein_coding	bs	NA
FBgn0004103	0.0235515	0.0645385	protein_coding	Pp1-87B	1
FBgn0004106	0.0396642	0.0982556	protein_coding	Cdk1	1
FBgn0004107	0.75303	0.835444	protein_coding	Cdk2	NA
FBgn0004108	0.392845	0.543773	protein_coding	Nrt	NA
FBgn0004117	0.0414437	0.101639	protein_coding	Tm2	NA
FBgn0004132	0.00156716	0.00674458	protein_coding	boca	4
FBgn0004133	0.603236	0.726638	protein_coding	blow	NA
FBgn0004167	0.0238269	0.0651023	protein_coding	kst	7
FBgn0004168	0.0552045	0.126516	protein_coding	5-HT1A	NA
FBgn0004169	0.0149245	0.0444735	protein_coding	up	1
FBgn0004170	1.84231e-05	0.00014004	protein_coding	sc	4
FBgn0004177	0.0129238	0.0395724	protein_coding	mts	1
FBgn0004179	0.468931	0.614559	protein_coding	Csp	NA
FBgn0004197	8.30115e-09	1.3577e-07	protein_coding	Ser	2
FBgn0004198	0.283936	0.432835	protein_coding	ct	NA
FBgn0004227	0.259104	0.404838	protein_coding	nonA	NA
FBgn0004228	8.10178e-05	0.000523616	protein_coding	mex1	1
FBgn0004237	0.0341916	0.0869596	protein_coding	Hrb87F	7
FBgn0004240	4.06573e-07	4.64179e-06	protein_coding	DptA	4
FBgn0004242	0.726104	0.816506	protein_coding	Syt1	NA
FBgn0004359	0.750652	0.833472	protein_coding	T48	NA
FBgn0004362	1.02453e-09	2.07102e-08	protein_coding	HmgD	1
FBgn0004363	0.0107574	0.0339404	protein_coding	porin	1
FBgn0004364	4.4331e-08	6.207e-07	protein_coding	18w	6
FBgn0004367	0.0165049	0.0482438	protein_coding	mei-41	2
FBgn0004368	0.973411	0.98393	protein_coding	Ptp4E	NA
FBgn0004369	2.88637e-05	0.000209122	protein_coding	Ptp99A	5
FBgn0004370	0.121474	0.231236	protein_coding	Ptp10D	NA
FBgn0004373	0.927279	0.951402	protein_coding	fwd	NA
FBgn0004374	0.760588	0.839812	protein_coding	neb	NA
FBgn0004378	0.0251892	0.0679695	protein_coding	Klp61F	1
FBgn0004379	0.325282	0.476519	protein_coding	Klp67A	NA
FBgn0004380	0.216392	0.356417	protein_coding	Klp64D	NA
FBgn0004381	1.75547e-09	3.38027e-08	protein_coding	Klp68D	1
FBgn0004387	0.0151754	0.0450487	protein_coding	Klp98A	7
FBgn0004390	0.841244	0.893444	protein_coding	RasGAP1	NA
FBgn0004391	0.0547275	0.125763	protein_coding	shtd	NA
FBgn0004394	0.106698	0.209736	protein_coding	pdm2	NA
FBgn0004395	4.24835e-06	3.75358e-05	protein_coding	unk	7
FBgn0004396	6.73342e-08	9.08719e-07	protein_coding	CrebA	5
FBgn0004397	2.64483e-08	3.87187e-07	protein_coding	Vinc	1
FBgn0004401	0.0218593	0.0605768	protein_coding	Pep	5
FBgn0004403	2.43069e-07	2.89544e-06	protein_coding	RpS14a	5
FBgn0004404	3.9698e-12	1.35306e-10	protein_coding	RpS14b	5
FBgn0004406	0.623518	0.742923	protein_coding	tam	NA
FBgn0004407	0.12912	0.242341	protein_coding	DNApol-gamma35	NA
FBgn0004419	0.161894	0.287985	protein_coding	me31B	NA
FBgn0004425	0.263976	0.409582	protein_coding	LysB	NA
FBgn0004426	0.357448	0.508718	pseudogene	LysC	NA
FBgn0004427	0.011926	0.0369532	protein_coding	LysD	2
FBgn0004428	1.2491e-06	1.25975e-05	protein_coding	LysE	5
FBgn0004429	6.5121e-05	0.000429192	protein_coding	LysP	7
FBgn0004431	0.0914035	0.18691	protein_coding	LysX	NA
FBgn0004432	0.00710148	0.0240114	protein_coding	Cyp1	1
FBgn0004435	0.0152204	0.0451535	protein_coding	Galphaq	1
FBgn0004436	2.11619e-08	3.17224e-07	protein_coding	Ubc6	7
FBgn0004449	0.0623016	0.138664	protein_coding	Ten-m	NA
FBgn0004456	9.76541e-10	1.98691e-08	protein_coding	mew	1
FBgn0004463	0.0306321	0.0794869	protein_coding	RpIII128	6
FBgn0004465	0.318143	0.468856	protein_coding	Su(P)	NA
FBgn0004507	0.102056	0.202597	protein_coding	GlyP	NA
FBgn0004509	6.22622e-06	5.25263e-05	protein_coding	Fur1	1
FBgn0004510	0.281776	0.430239	protein_coding	Ets97D	NA
FBgn0004512	0.347404	0.498986	protein_coding	Mdr49	NA
FBgn0004513	0.242749	0.386535	protein_coding	Mdr65	NA
FBgn0004516	0.118161	0.226765	protein_coding	Gad1	NA
FBgn0004552	6.12701e-17	4.93277e-15	protein_coding	Akh	6
FBgn0004556	0.890586	0.926829	protein_coding	Dbp73D	NA
FBgn0004569	0.00674001	0.0230062	protein_coding	aos	7
FBgn0004573	1.86657e-10	4.3471e-09	protein_coding	5-HT7	5
FBgn0004574	0.000164878	0.000987047	protein_coding	Rop	1
FBgn0004575	1.55423e-05	0.000120556	protein_coding	Syn	2
FBgn0004580	0.000345973	0.00186335	protein_coding	Cbp53E	1
FBgn0004583	0.0779679	0.164962	protein_coding	ex	NA
FBgn0004584	8.51283e-05	0.00054753	protein_coding	Rrp1	1
FBgn0004587	0.00814256	0.026945	protein_coding	B52	5
FBgn0004595	0.0244861	0.0665141	protein_coding	pros	2
FBgn0004597	0.0125076	0.0384618	protein_coding	CycC	4
FBgn0004598	0.728948	0.818325	protein_coding	Fur2	NA
FBgn0004606	0.000542975	0.00274991	protein_coding	zfh1	6
FBgn0004607	1.00758e-05	8.14699e-05	protein_coding	zfh2	3
FBgn0004611	0.674579	0.780946	protein_coding	Plc21C	NA
FBgn0004620	0.95029	0.967593	protein_coding	GluRIIA	NA
FBgn0004622	0.040051	0.0989776	protein_coding	TkR99D	2
FBgn0004629	0.153545	0.276345	protein_coding	Cys	NA
FBgn0004635	7.13921e-06	5.95296e-05	protein_coding	rho	4
FBgn0004636	0.000879451	0.00414907	protein_coding	Rap1	7
FBgn0004638	0.221842	0.362644	protein_coding	drk	NA
FBgn0004643	0.0984552	0.197227	protein_coding	Zw10	NA
FBgn0004644	0.570908	0.700343	protein_coding	hh	NA
FBgn0004646	2.56641e-11	7.11209e-10	protein_coding	ogre	2
FBgn0004647	0.00135752	0.00595207	protein_coding	N	1
FBgn0004648	0.000565704	0.00284804	protein_coding	svr	1
FBgn0004649	0.334301	0.485467	protein_coding	yl	NA
FBgn0004652	0.00804604	0.0267029	protein_coding	fru	6
FBgn0004654	0.0804036	0.16931	protein_coding	Pgd	NA
FBgn0004655	0.223214	0.364174	protein_coding	wapl	NA
FBgn0004656	0.187385	0.321099	protein_coding	fs(1)h	NA
FBgn0004657	1.62898e-06	1.59801e-05	protein_coding	mys	1
FBgn0004687	0.586479	0.713079	protein_coding	Mlc-c	NA
FBgn0004698	0.00195889	0.00815244	protein_coding	Xpc	5
FBgn0004795	3.70724e-07	4.2902e-06	protein_coding	retn	2
FBgn0004797	0.233311	0.375845	protein_coding	mdy	NA
FBgn0004811	0.946651	0.965255	protein_coding	fs(2)ltoPP43	NA
FBgn0004828	0.142804	0.261346	protein_coding	His3.3B	NA
FBgn0004832	0.111534	0.216778	protein_coding	Xpac	NA
FBgn0004837	0.568217	0.698403	protein_coding	Su(H)	NA
FBgn0004838	0.141337	0.259373	protein_coding	Hrb27C	NA
FBgn0004839	0.397558	0.548014	protein_coding	otk	NA
FBgn0004842	0.733422	0.821373	protein_coding	RYa-R	NA
FBgn0004852	0.382755	0.534061	protein_coding	Ac76E	NA
FBgn0004855	0.257847	0.403423	protein_coding	RpII15	NA
FBgn0004856	0.858208	0.904606	protein_coding	Bx42	NA
FBgn0004858	0.937372	0.95841	protein_coding	elB	NA
FBgn0004859	0.975669	0.985802	protein_coding	ci	NA
FBgn0004860	0.718326	0.810982	protein_coding	ph-d	NA
FBgn0004861	0.125559	0.237559	protein_coding	ph-p	NA
FBgn0004864	0.673266	0.780103	protein_coding	hop	NA
FBgn0004865	0.018444	0.0527983	protein_coding	Eip78C	1
FBgn0004867	8.7613e-15	4.7024e-13	protein_coding	RpS2	5
FBgn0004868	1.96318e-05	0.000147499	protein_coding	Gdi	1
FBgn0004870	0.0180386	0.0519277	protein_coding	bab1	6
FBgn0004875	0.0104489	0.0331799	protein_coding	enc	7
FBgn0004876	8.93064e-05	0.000571646	protein_coding	cdi	6
FBgn0004882	0.313189	0.46404	protein_coding	orb	NA
FBgn0004885	0.342769	0.49461	protein_coding	tok	NA
FBgn0004888	0.552957	0.684708	protein_coding	Scsalpha1	NA
FBgn0004889	0.981769	0.98947	protein_coding	tws	NA
FBgn0004892	0.00317822	0.0122347	protein_coding	sob	6
FBgn0004893	0.0387032	0.0963093	protein_coding	bowl	5
FBgn0004901	0.0155374	0.0458715	protein_coding	Prat	2
FBgn0004903	0.629781	0.748286	protein_coding	Rb97D	NA
FBgn0004907	0.600792	0.724347	protein_coding	14-3-3zeta	NA
FBgn0004908	0.378406	0.530382	protein_coding	Arl2	NA
FBgn0004910	0.709896	0.80517	protein_coding	Eip63F-1	NA
FBgn0004911	0.660088	0.770334	ncRNA	asRNA:Eig63F-2	NA
FBgn0004913	0.168988	0.296427	protein_coding	Gnf1	NA
FBgn0004914	0.247928	0.392641	protein_coding	Hnf4	NA
FBgn0004915	0.252197	0.397111	protein_coding	TfIIB	NA
FBgn0004919	0.00132875	0.00584511	protein_coding	gol	5
FBgn0004921	0.0802708	0.169106	protein_coding	Ggamma1	NA
FBgn0004924	0.165883	0.292851	protein_coding	Top1	NA
FBgn0004926	0.897104	0.930736	protein_coding	eIF2beta	NA
FBgn0004957	0.507675	0.647172	protein_coding	por	NA
FBgn0005198	0.724719	0.815615	protein_coding	gig	NA
FBgn0005278	4.38025e-10	9.5133e-09	protein_coding	Sam-S	5
FBgn0005322	0.2959	0.445999	protein_coding	nmd	NA
FBgn0005355	0.511555	0.650607	protein_coding	Su(fu)	NA
FBgn0005386	0.273104	0.420116	protein_coding	ash1	NA
FBgn0005391	0.329158	0.479864	protein_coding	Yp2	NA
FBgn0005411	0.133567	0.248978	protein_coding	U2af50	NA
FBgn0005427	0.0554746	0.126949	protein_coding	ewg	NA
FBgn0005533	9.79575e-12	3.08022e-10	protein_coding	RpS17	5
FBgn0005536	0.0122896	0.0379271	protein_coding	Mbs	7
FBgn0005564	0.12825	0.241283	protein_coding	Shal	NA
FBgn0005585	0.00442907	0.0161134	protein_coding	Calr	2
FBgn0005586	0.000584146	0.00292355	protein_coding	Rab3	4
FBgn0005593	1.11733e-10	2.69633e-09	protein_coding	RpL7	5
FBgn0005596	0.550804	0.683403	protein_coding	yem	NA
FBgn0005612	6.18578e-13	2.43751e-11	protein_coding	Sox14	1
FBgn0005614	0.832379	0.887144	protein_coding	trpl	NA
FBgn0005616	0.825598	0.883293	protein_coding	msl-2	NA
FBgn0005617	0.484239	0.628186	protein_coding	msl-1	NA
FBgn0005624	0.232842	0.375174	protein_coding	Psc	NA
FBgn0005626	1.24641e-07	1.57727e-06	protein_coding	ple	3
FBgn0005631	0.0136812	0.0415644	protein_coding	robo1	7
FBgn0005632	0.0228616	0.062962	protein_coding	faf	2
FBgn0005633	7.2894e-08	9.79507e-07	protein_coding	fln	5
FBgn0005636	0.848672	0.898807	protein_coding	nvy	NA
FBgn0005638	0.00160111	0.00686223	protein_coding	slbo	1
FBgn0005640	0.0140485	0.0424867	protein_coding	Eip63E	7
FBgn0005642	0.0045015	0.0163578	protein_coding	wdn	5
FBgn0005648	0.0129179	0.039567	protein_coding	Pabp2	4
FBgn0005649	6.48826e-05	0.000427923	protein_coding	Rox8	1
FBgn0005654	0.191012	0.325463	protein_coding	Orc3	NA
FBgn0005655	4.33993e-09	7.59001e-08	protein_coding	PCNA	1
FBgn0005659	0.0267785	0.0712695	protein_coding	Ets98B	5
FBgn0005660	0.00170565	0.00725037	protein_coding	Ets21C	7
FBgn0005664	1.54546e-05	0.000119975	protein_coding	Crys	1
FBgn0005666	0.0184474	0.0527983	protein_coding	bt	1
FBgn0005670	1.54856e-56	1.60689e-53	protein_coding	Cyp4d1	6
FBgn0005671	0.00245341	0.0098126	protein_coding	Vha55	6
FBgn0005672	0.605741	0.728969	protein_coding	spi	NA
FBgn0005674	0.0933895	0.189849	protein_coding	GluProRS	NA
FBgn0005677	0.668694	0.776637	protein_coding	dac	NA
FBgn0005683	0.514263	0.652629	protein_coding	pie	NA
FBgn0005694	0.0108103	0.0340843	protein_coding	Aef1	5
FBgn0005695	0.563452	0.693931	protein_coding	gcl	NA
FBgn0005696	8.16787e-05	0.000527523	protein_coding	DNApol-alpha73	1
FBgn0005771	0.504903	0.644694	protein_coding	noc	NA
FBgn0005777	0.036102	0.0908532	protein_coding	PpD3	1
FBgn0008635	0.229461	0.37165	protein_coding	betaCOP	NA
FBgn0008646	0.997324	0.998975	protein_coding	E5	NA
FBgn0010014	0.299668	0.449936	protein_coding	CanB	NA
FBgn0010015	0.129124	0.242341	protein_coding	CanA1	NA
FBgn0010019	0.262738	0.408748	protein_coding	Cyp4g1	NA
FBgn0010038	5.47e-13	2.17443e-11	protein_coding	GstD2	1
FBgn0010039	0.0211322	0.0589115	protein_coding	GstD3	1
FBgn0010040	4.18024e-06	3.70041e-05	protein_coding	GstD4	1
FBgn0010041	1.04958e-09	2.11708e-08	protein_coding	GstD5	1
FBgn0010043	1.68433e-06	1.64196e-05	protein_coding	GstD7	4
FBgn0010044	7.29489e-42	5.24054e-39	protein_coding	GstD8	1
FBgn0010051	3.84837e-07	4.42675e-06	protein_coding	Itpr	5
FBgn0010053	6.52909e-08	8.87557e-07	protein_coding	Jheh1	5
FBgn0010078	2.64068e-09	4.91261e-08	protein_coding	RpL23	5
FBgn0010100	0.000481943	0.00248667	protein_coding	mAcon1	5
FBgn0010105	0.459409	0.605992	protein_coding	comm	NA
FBgn0010113	0.00125682	0.00557067	protein_coding	hdc	7
FBgn0010173	9.03055e-09	1.46672e-07	protein_coding	RpA-70	1
FBgn0010194	0.37503	0.527788	protein_coding	Wnt5	NA
FBgn0010198	3.29438e-08	4.74787e-07	protein_coding	RpS15Aa	5
FBgn0010213	0.016188	0.0475109	protein_coding	Sod2	5
FBgn0010215	0.00398204	0.0147222	protein_coding	alpha-Cat	1
FBgn0010217	0.0536076	0.123701	protein_coding	ATPsynbeta	NA
FBgn0010220	0.0165252	0.0482882	protein_coding	Dbp45A	6
FBgn0010222	0.649133	0.762068	protein_coding	Nmdmc	NA
FBgn0010223	0.00667704	0.0228581	protein_coding	Galphaf	3
FBgn0010225	0.86005	0.905832	protein_coding	Gel	NA
FBgn0010226	0.000285672	0.00158332	protein_coding	GstS1	1
FBgn0010228	0.164111	0.290877	protein_coding	HmgZ	NA
FBgn0010235	0.0168221	0.0490149	protein_coding	Klc	1
FBgn0010238	0.000316999	0.00173475	protein_coding	Lac	6
FBgn0010240	0.789213	0.858778	protein_coding	Lcch3	NA
FBgn0010241	1.75811e-15	1.03918e-13	protein_coding	Mdr50	6
FBgn0010246	0.120291	0.229547	protein_coding	Myo61F	NA
FBgn0010247	6.62936e-09	1.11956e-07	protein_coding	Parp	1
FBgn0010263	0.265101	0.410915	protein_coding	Rbp9	NA
FBgn0010265	2.79604e-06	2.56706e-05	protein_coding	RpS13	5
FBgn0010269	0.217613	0.357932	protein_coding	Dsor1	NA
FBgn0010278	0.00420147	0.0154236	protein_coding	Ssrp	1
FBgn0010280	0.000110614	0.000690066	protein_coding	Taf4	5
FBgn0010282	0.15374	0.276589	protein_coding	TfIIFalpha	NA
FBgn0010287	0.577662	0.706123	protein_coding	Trf	NA
FBgn0010288	3.56118e-16	2.44543e-14	protein_coding	Uch	1
FBgn0010292	0.150958	0.272899	protein_coding	bys	NA
FBgn0010300	0.000861452	0.00407553	protein_coding	brat	7
FBgn0010303	0.000136387	0.000834676	protein_coding	hep	7
FBgn0010309	0.839573	0.892315	protein_coding	pigeon	NA
FBgn0010313	0.431741	0.580065	protein_coding	corto	NA
FBgn0010314	0.199261	0.335182	protein_coding	Cks30A	NA
FBgn0010315	0.662638	0.772196	protein_coding	CycD	NA
FBgn0010316	0.0317473	0.0818801	protein_coding	dap	5
FBgn0010328	0.0633877	0.140379	protein_coding	woc	NA
FBgn0010333	0.00838726	0.0276097	protein_coding	Rac1	1
FBgn0010339	0.0144404	0.0433072	protein_coding	128up	5
FBgn0010340	0.685974	0.788953	protein_coding	140up	NA
FBgn0010341	5.64524e-07	6.23179e-06	protein_coding	Cdc42	1
FBgn0010342	0.746318	0.83118	protein_coding	Map60	NA
FBgn0010348	0.0155995	0.0459861	protein_coding	Arf79F	7
FBgn0010350	4.91087e-10	1.04949e-08	protein_coding	Cds	6
FBgn0010352	0.253366	0.398684	protein_coding	Nc73EF	NA
FBgn0010355	0.00109622	0.00499638	protein_coding	Taf1	5
FBgn0010356	0.538998	0.673585	protein_coding	Taf5	NA
FBgn0010357	0.613464	0.734909	protein_coding	betaTry	NA
FBgn0010358	0.000948921	0.004422	protein_coding	deltaTry	5
FBgn0010359	0.00125967	0.00558067	protein_coding	gammaTry	5
FBgn0010379	0.0076018	0.0254365	protein_coding	Akt1	7
FBgn0010380	0.0724495	0.156044	protein_coding	AP-1-2beta	NA
FBgn0010382	0.000318789	0.00174307	protein_coding	CycE	1
FBgn0010383	0.489386	0.631878	protein_coding	Cyp18a1	NA
FBgn0010385	0.00395516	0.0146402	protein_coding	Def	4
FBgn0010387	6.883e-21	1.10622e-18	protein_coding	Acbp2	4
FBgn0010388	3.18264e-09	5.7714e-08	protein_coding	Dro	4
FBgn0010389	0.464946	0.611396	protein_coding	htl	NA
FBgn0010391	0.000606664	0.00301685	protein_coding	SrpRalpha	2
FBgn0010395	4.95171e-05	0.000338951	protein_coding	Itgbn	7
FBgn0010397	0.106665	0.209736	protein_coding	LamC	NA
FBgn0010398	0.116506	0.224433	protein_coding	Lrr47	NA
FBgn0010406	0.00042393	0.00222395	protein_coding	RNaseX25	6
FBgn0010408	3.01666e-13	1.2577e-11	protein_coding	RpS9	5
FBgn0010409	2.05167e-11	5.95047e-10	protein_coding	RpL18A	5
FBgn0010411	0.00011786	0.000729903	protein_coding	RpS18	5
FBgn0010412	7.85772e-09	1.29882e-07	protein_coding	RpS19a	5
FBgn0010415	0.00977663	0.0313975	protein_coding	Sdc	1
FBgn0010416	0.945378	0.964273	protein_coding	TH1	NA
FBgn0010417	0.613768	0.735152	protein_coding	Taf6	NA
FBgn0010421	0.230291	0.372693	protein_coding	TfIIFbeta	NA
FBgn0010422	0.287956	0.436917	protein_coding	TfIIS	NA
FBgn0010423	0.0754575	0.161184	protein_coding	TpnC47D	NA
FBgn0010424	0.00644123	0.0221482	protein_coding	TpnC73F	1
FBgn0010425	0.420115	0.569276	protein_coding	epsilonTry	NA
FBgn0010434	4.94051e-06	4.28407e-05	protein_coding	cora	7
FBgn0010435	8.91941e-11	2.22129e-09	protein_coding	emp	6
FBgn0010438	0.398215	0.548596	protein_coding	mtSSB	NA
FBgn0010441	0.221994	0.362828	protein_coding	pll	NA
FBgn0010452	0.568567	0.698451	protein_coding	trn	NA
FBgn0010453	0.487252	0.630518	protein_coding	Wnt4	NA
FBgn0010470	9.08061e-17	7.24819e-15	protein_coding	Fkbp14	1
FBgn0010473	0.170537	0.298527	protein_coding	tutl	NA
FBgn0010482	1.19464e-08	1.89418e-07	protein_coding	l(2)01289	4
FBgn0010488	0.0172211	0.0499309	protein_coding	NAT1	7
FBgn0010497	0.0171411	0.0497301	protein_coding	dmGlut	6
FBgn0010501	6.03908e-09	1.02172e-07	protein_coding	Dcp-1	5
FBgn0010504	0.0834153	0.174628	protein_coding	kermit	NA
FBgn0010516	0.00961178	0.0309532	protein_coding	wal	6
FBgn0010520	0.0121588	0.0375997	protein_coding	Bka	5
FBgn0010531	0.0403889	0.0996068	protein_coding	Ccs	6
FBgn0010548	0.164467	0.291232	protein_coding	Aldh-III	NA
FBgn0010549	6.61783e-06	5.5579e-05	protein_coding	l(2)03659	7
FBgn0010551	0.196347	0.332069	protein_coding	Phb2	NA
FBgn0010583	0.161924	0.287985	protein_coding	dock	NA
FBgn0010590	0.218647	0.358992	protein_coding	Prosbeta1	NA
FBgn0010591	0.00311129	0.0120018	protein_coding	Sply	3
FBgn0010602	0.0271201	0.0720553	protein_coding	lwr	5
FBgn0010607	0.370337	0.522365	protein_coding	l(2)05714	NA
FBgn0010611	0.0026308	0.0103974	protein_coding	Hmgs	3
FBgn0010612	0.0735375	0.157914	protein_coding	ATPsynG	NA
FBgn0010620	0.00140423	0.00611094	protein_coding	CG10939	2
FBgn0010621	0.0615959	0.137552	protein_coding	CCT5	NA
FBgn0010622	0.000224984	0.00129699	protein_coding	DCTN3-p24	1
FBgn0010638	0.605127	0.728556	protein_coding	Sec61beta	NA
FBgn0010651	0.317426	0.468094	protein_coding	MFS14	NA
FBgn0010660	0.609657	0.73217	protein_coding	Nup214	NA
FBgn0010741	0.0341153	0.0867891	protein_coding	Pfdn2	7
FBgn0010747	0.0216275	0.0600949	protein_coding	Srp54k	5
FBgn0010750	0.579947	0.707158	protein_coding	atms	NA
FBgn0010762	0.16248	0.2887	protein_coding	simj	NA
FBgn0010768	0.735758	0.823377	protein_coding	sqz	NA
FBgn0010770	0.14337	0.262177	protein_coding	ppan	NA
FBgn0010772	0.0057007	0.0199996	protein_coding	Xe7	5
FBgn0010774	1.07587e-05	8.65423e-05	protein_coding	Ref1	4
FBgn0010786	0.692775	0.793458	protein_coding	l(3)02640	NA
FBgn0010803	0.0496472	0.116672	protein_coding	TrpRS	NA
FBgn0010808	0.297971	0.448036	protein_coding	Chchd3	NA
FBgn0010812	8.08376e-10	1.66654e-08	protein_coding	unc-45	1
FBgn0010825	0.00359282	0.0135023	protein_coding	Gug	2
FBgn0010830	0.00176048	0.00742818	protein_coding	l(3)04053	2
FBgn0010877	0.0695845	0.151198	protein_coding	l(3)05822	NA
FBgn0010894	0.0232175	0.0638079	protein_coding	sinu	6
FBgn0010905	0.0760377	0.161805	protein_coding	Spn	NA
FBgn0010909	1.95102e-06	1.86305e-05	protein_coding	msn	7
FBgn0010926	0.165688	0.292673	protein_coding	l(3)07882	NA
FBgn0011016	0.561482	0.692327	protein_coding	SsRbeta	NA
FBgn0011020	0.217657	0.357932	protein_coding	Sas-4	NA
FBgn0011202	0.067272	0.14727	protein_coding	dia	NA
FBgn0011204	1.89949e-10	4.40181e-09	protein_coding	cue	6
FBgn0011205	0.012175	0.0376374	protein_coding	fbl	4
FBgn0011206	8.08956e-09	1.32812e-07	protein_coding	bol	5
FBgn0011207	0.386689	0.537475	protein_coding	pelo	NA
FBgn0011211	0.0647966	0.14299	protein_coding	blw	NA
FBgn0011217	0.0763465	0.162304	protein_coding	eff	NA
FBgn0011224	0.509032	0.648193	protein_coding	heph	NA
FBgn0011225	1.24878e-08	1.96336e-07	protein_coding	jar	7
FBgn0011227	0.799865	0.866985	protein_coding	ox	NA
FBgn0011230	0.0131114	0.0400546	protein_coding	poe	5
FBgn0011232	0.234945	0.377796	protein_coding	scat	NA
FBgn0011236	0.231958	0.374138	protein_coding	ken	NA
FBgn0011259	0.523906	0.661094	protein_coding	Sema1a	NA
FBgn0011260	4.39402e-20	5.94721e-18	protein_coding	Sema2a	1
FBgn0011272	8.35646e-09	1.36197e-07	protein_coding	RpL13	5
FBgn0011274	0.633906	0.750798	protein_coding	Dif	NA
FBgn0011284	9.41203e-12	2.97963e-10	protein_coding	RpS4	5
FBgn0011286	0.271881	0.418509	protein_coding	RyR	NA
FBgn0011289	0.825738	0.883341	protein_coding	TfIIA-L	NA
FBgn0011290	0.625814	0.745183	protein_coding	Taf12	NA
FBgn0011291	0.0331461	0.084855	protein_coding	Taf11	4
FBgn0011296	0.161201	0.287246	protein_coding	l(2)efl	NA
FBgn0011297	0.0156082	0.0459971	protein_coding	Alg3	7
FBgn0011300	0.196328	0.332069	protein_coding	babo	NA
FBgn0011305	0.0360677	0.090816	protein_coding	Rsf1	6
FBgn0011327	0.00370127	0.0138431	protein_coding	Uch-L5	1
FBgn0011335	0.51742	0.65556	protein_coding	vers	NA
FBgn0011336	0.237911	0.381303	protein_coding	Stt3B	NA
FBgn0011361	0.0202595	0.0568863	protein_coding	ND-ACP	1
FBgn0011455	0.00221486	0.00901287	protein_coding	ND-SGDH	6
FBgn0011474	0.384888	0.535928	protein_coding	PR-Set7	NA
FBgn0011476	0.533019	0.668529	protein_coding	l(3)neo43	NA
FBgn0011481	0.109495	0.213621	protein_coding	Ssdp	NA
FBgn0011509	0.0194193	0.0548734	protein_coding	SrpRbeta	2
FBgn0011554	0.000433861	0.00227248	protein_coding	etaTry	1
FBgn0011555	1.43697e-13	6.30039e-12	protein_coding	thetaTry	5
FBgn0011556	1.93165e-11	5.63739e-10	protein_coding	zetaTry	6
FBgn0011566	0.673761	0.780446	protein_coding	Smyd3	NA
FBgn0011570	5.64365e-09	9.61789e-08	protein_coding	cpb	1
FBgn0011573	0.702679	0.800575	protein_coding	Cdc37	NA
FBgn0011576	0.000485485	0.00249984	protein_coding	Cyp4d2	2
FBgn0011584	2.72118e-11	7.47444e-10	protein_coding	Trp1	5
FBgn0011586	0.0033555	0.012749	protein_coding	e(r)	4
FBgn0011589	0.972027	0.983001	protein_coding	Elk	NA
FBgn0011591	0.000191958	0.00113032	protein_coding	fng	7
FBgn0011592	0.00571876	0.0200403	protein_coding	fra	1
FBgn0011603	0.354421	0.505943	protein_coding	ine	NA
FBgn0011604	0.371286	0.523466	protein_coding	Iswi	NA
FBgn0011606	0.351831	0.503178	protein_coding	Klp3A	NA
FBgn0011638	0.0106089	0.0335616	protein_coding	La	7
FBgn0011640	0.126371	0.23867	protein_coding	lark	NA
FBgn0011642	0.0982454	0.196976	protein_coding	Zyx	NA
FBgn0011648	0.000174074	0.00103612	protein_coding	Mad	7
FBgn0011655	0.508214	0.647594	protein_coding	Med	NA
FBgn0011656	0.531795	0.66772	protein_coding	Mef2	NA
FBgn0011659	0.0466006	0.11105	protein_coding	Mlh1	NA
FBgn0011660	0.0483917	0.11421	protein_coding	Pms2	NA
FBgn0011661	0.124974	0.236693	protein_coding	Moe	NA
FBgn0011666	0.626139	0.745381	protein_coding	msi	NA
FBgn0011672	0.00376946	0.0140699	protein_coding	Mvl	6
FBgn0011674	7.93674e-10	1.63985e-08	protein_coding	insc	1
FBgn0011692	0.233338	0.375845	protein_coding	pav	NA
FBgn0011695	5.46591e-19	5.9356e-17	protein_coding	EbpIII	2
FBgn0011703	1.07742e-10	2.61351e-09	protein_coding	RnrL	1
FBgn0011704	0.480432	0.624722	protein_coding	RnrS	NA
FBgn0011705	0.085675	0.177844	protein_coding	rost	NA
FBgn0011708	0.0103947	0.03306	protein_coding	Syx5	4
FBgn0011710	0.000181288	0.00107564	protein_coding	Sep1	1
FBgn0011715	0.828457	0.884888	protein_coding	Snr1	NA
FBgn0011722	0.719376	0.811801	protein_coding	Tig	NA
FBgn0011723	0.749557	0.832851	protein_coding	byn	NA
FBgn0011725	0.588946	0.714985	protein_coding	twin	NA
FBgn0011726	1.92683e-07	2.35532e-06	protein_coding	tsr	1
FBgn0011737	0.268995	0.415298	protein_coding	Wee1	NA
FBgn0011739	0.0133621	0.0407009	protein_coding	wts	5
FBgn0011740	0.84674	0.897481	protein_coding	alpha-Man-IIa	NA
FBgn0011741	0.935256	0.956992	protein_coding	Arp6	NA
FBgn0011742	5.00043e-05	0.000341117	protein_coding	Arp2	1
FBgn0011745	0.00781848	0.0260495	protein_coding	Arp1	1
FBgn0011746	0.000942453	0.00440078	protein_coding	ana	4
FBgn0011747	0.452853	0.599376	protein_coding	Ank	NA
FBgn0011754	0.193174	0.328308	protein_coding	PhKgamma	NA
FBgn0011760	0.300436	0.450944	protein_coding	ctp	NA
FBgn0011761	0.269886	0.416537	protein_coding	dhd	NA
FBgn0011762	0.00880318	0.0287257	protein_coding	DNApol-alpha50	1
FBgn0011763	0.0350602	0.0886136	protein_coding	Dp	5
FBgn0011766	0.0323451	0.0831464	protein_coding	E2f1	2
FBgn0011768	0.0654192	0.144092	protein_coding	Fdh	NA
FBgn0011769	0.710353	0.805278	protein_coding	Fdx1	NA
FBgn0011770	0.00134862	0.00592138	protein_coding	Gip	1
FBgn0011771	0.000763158	0.00366057	protein_coding	Hem	1
FBgn0011774	0.0102314	0.032667	protein_coding	Irbp	7
FBgn0011785	0.263618	0.409352	protein_coding	BRWD3	NA
FBgn0011787	0.481848	0.625954	protein_coding	mRpL12	NA
FBgn0011802	0.231734	0.373943	protein_coding	Gem3	NA
FBgn0011817	0.15218	0.274489	protein_coding	nmo	NA
FBgn0011818	0.521177	0.659048	protein_coding	oaf	NA
FBgn0011822	0.000586645	0.00293205	protein_coding	Pgcl	1
FBgn0011824	9.13348e-07	9.57324e-06	protein_coding	CG4038	5
FBgn0011826	0.0490857	0.115527	protein_coding	Pp2B-14D	NA
FBgn0011828	0.267813	0.414021	protein_coding	Pxn	NA
FBgn0011829	0.156254	0.280357	protein_coding	Ret	NA
FBgn0011834	1.43563e-11	4.28351e-10	protein_coding	Ser6	3
FBgn0011836	0.691238	0.792569	protein_coding	Taf2	NA
FBgn0011837	0.868469	0.911717	protein_coding	Tis11	NA
FBgn0012034	0.900468	0.932831	protein_coding	AcCoAS	NA
FBgn0012036	0.0283674	0.0746895	protein_coding	Aldh	3
FBgn0012037	4.15225e-17	3.40156e-15	protein_coding	Ance	6
FBgn0012051	0.302945	0.453181	protein_coding	CalpA	NA
FBgn0012058	0.620387	0.740516	protein_coding	Cdc27	NA
FBgn0012344	0.00881144	0.0287325	protein_coding	Dh44	6
FBgn0013263	0.324816	0.476136	protein_coding	Trl	NA
FBgn0013269	0.0403541	0.0995685	protein_coding	Fkbp39	5
FBgn0013272	0.00171209	0.00726121	protein_coding	Gp150	5
FBgn0013276	0.0143235	0.0430972	protein_coding	Hsp70Ab	4
FBgn0013277	0.000104869	0.000658179	protein_coding	Hsp70Ba	4
FBgn0013278	1.16388e-06	1.18018e-05	protein_coding	Hsp70Bb	1
FBgn0013279	0.229762	0.372009	protein_coding	Hsp70Bc	NA
FBgn0013303	0.051186	0.119208	protein_coding	Nca	NA
FBgn0013305	2.95563e-06	2.70614e-05	protein_coding	Nmda1	7
FBgn0013307	0.179207	0.310419	protein_coding	Odc1	NA
FBgn0013323	0.000109734	0.000685947	protein_coding	Ptth	5
FBgn0013325	8.31598e-09	1.35774e-07	protein_coding	RpL11	5
FBgn0013334	0.0204615	0.0573326	protein_coding	Sap47	5
FBgn0013342	0.186975	0.320514	protein_coding	nSyb	NA
FBgn0013343	3.12074e-07	3.66599e-06	protein_coding	Syx1A	7
FBgn0013347	0.564327	0.694825	protein_coding	TfIIA-S	NA
FBgn0013432	2.05194e-06	1.94746e-05	protein_coding	bcn92	1
FBgn0013435	0.433391	0.581696	protein_coding	Cdc2rk	NA
FBgn0013467	0.000921828	0.00431527	protein_coding	igl	3
FBgn0013469	0.00938425	0.0303171	protein_coding	klu	7
FBgn0013531	0.3158	0.466829	protein_coding	MED20	NA
FBgn0013548	0.92535	0.950071	protein_coding	l(2)dtl	NA
FBgn0013563	0.0846808	0.176488	protein_coding	Pex1	NA
FBgn0013576	0.0103519	0.0329616	protein_coding	mtd	7
FBgn0013672	0.0848836	0.176869	protein_coding	mt:ATPase6	NA
FBgn0013674	8.92417e-08	1.16713e-06	protein_coding	mt:CoI	1
FBgn0013675	0.0342015	0.0869609	protein_coding	mt:CoII	1
FBgn0013678	0.00807757	0.0267674	protein_coding	mt:Cyt-b	1
FBgn0013679	0.569538	0.699266	protein_coding	mt:ND1	NA
FBgn0013680	0.437568	0.585381	protein_coding	mt:ND2	NA
FBgn0013681	0.489599	0.632066	protein_coding	mt:ND3	NA
FBgn0013683	0.501207	0.641955	protein_coding	mt:ND4L	NA
FBgn0013684	0.0230858	0.0635233	protein_coding	mt:ND5	3
FBgn0013685	0.954798	0.971018	protein_coding	mt:ND6	NA
FBgn0013717	0.679736	0.784413	protein_coding	not	NA
FBgn0013718	3.48212e-05	0.000247862	protein_coding	nuf	6
FBgn0013720	0.827421	0.884331	protein_coding	pck	NA
FBgn0013726	1.01513e-11	3.16011e-10	protein_coding	pnut	1
FBgn0013732	0.0471187	0.112027	protein_coding	sced	NA
FBgn0013733	0.000215727	0.00125057	protein_coding	shot	5
FBgn0013746	0.517436	0.65556	protein_coding	alien	NA
FBgn0013749	4.6321e-09	8.04074e-08	protein_coding	Arf102F	4
FBgn0013750	0.0759224	0.161696	protein_coding	Arf51F	NA
FBgn0013753	0.771843	0.846734	protein_coding	Bgb	NA
FBgn0013756	0.0682666	0.149028	protein_coding	Mtor	NA
FBgn0013759	0.00185825	0.00780314	protein_coding	CASK	2
FBgn0013762	0.31615	0.467098	protein_coding	Cdk5	NA
FBgn0013763	0.33625	0.487767	protein_coding	Idgf6	NA
FBgn0013764	0.634942	0.751549	protein_coding	Chi	NA
FBgn0013765	8.9505e-25	2.32612e-22	protein_coding	cnn	7
FBgn0013770	1.67725e-05	0.000129239	protein_coding	Cp1	1
FBgn0013771	5.06003e-06	4.37552e-05	protein_coding	Cyp6a9	6
FBgn0013772	0.773525	0.847881	protein_coding	Cyp6a8	NA
FBgn0013773	0.376789	0.529104	protein_coding	Cyp6a22	NA
FBgn0013799	0.218023	0.35821	protein_coding	Deaf1	NA
FBgn0013811	0.0126094	0.0387365	protein_coding	Dhc62B	2
FBgn0013949	0.598669	0.722754	protein_coding	Elal	NA
FBgn0013953	0.643808	0.758195	protein_coding	Esp	NA
FBgn0013954	0.127651	0.240492	protein_coding	Fkbp12	NA
FBgn0013972	0.0253479	0.0682398	protein_coding	Gycalpha99B	2
FBgn0013973	0.43744	0.585381	protein_coding	Gycbeta100B	NA
FBgn0013981	1.19778e-10	2.87143e-09	protein_coding	His4r	6
FBgn0013983	0.16328	0.28979	protein_coding	imd	NA
FBgn0013987	1.39601e-05	0.000108826	protein_coding	MAPk-Ak2	1
FBgn0013995	0.211283	0.349915	protein_coding	Calx	NA
FBgn0013997	0.00148424	0.0064245	protein_coding	Nrx-IV	7
FBgn0014000	0.295618	0.445647	protein_coding	Hf	NA
FBgn0014002	0.105012	0.207294	NA	NA	NA
FBgn0014006	0.000735821	0.00355317	protein_coding	Ask1	5
FBgn0014007	0.248557	0.393319	protein_coding	Ptp69D	NA
FBgn0014009	0.00157378	0.00676372	protein_coding	Rab2	7
FBgn0014010	2.85736e-05	0.000207181	protein_coding	Rab5	1
FBgn0014011	2.54939e-08	3.76721e-07	protein_coding	Rac2	7
FBgn0014018	0.652905	0.765055	protein_coding	Rel	NA
FBgn0014020	2.29555e-13	9.83402e-12	protein_coding	Rho1	1
FBgn0014022	0.225928	0.367714	protein_coding	Rlb1	NA
FBgn0014023	0.768223	0.844383	protein_coding	mRpL47	NA
FBgn0014024	0.181492	0.313127	protein_coding	Rnp4F	NA
FBgn0014026	1.23704e-11	3.75089e-10	protein_coding	RpL7A	5
FBgn0014028	0.0208413	0.0582477	protein_coding	SdhB	5
FBgn0014029	2.65986e-06	2.45944e-05	protein_coding	Sep2	1
FBgn0014031	0.291347	0.440773	protein_coding	Spat	NA
FBgn0014032	0.130613	0.24435	protein_coding	Sptr	NA
FBgn0014033	9.50587e-05	0.000606389	protein_coding	Sr-CI	6
FBgn0014037	0.204886	0.34248	protein_coding	Su(Tpl)	NA
FBgn0014073	3.83957e-06	3.44786e-05	protein_coding	Tie	5
FBgn0014075	0.000145609	0.000881299	protein_coding	Uggt	4
FBgn0014092	0.860774	0.906288	protein_coding	CG4278	NA
FBgn0014127	0.324281	0.475647	protein_coding	barr	NA
FBgn0014133	1.3437e-05	0.000105364	protein_coding	bif	7
FBgn0014135	0.226909	0.36886	protein_coding	bnl	NA
FBgn0014141	4.7382e-05	0.000327536	protein_coding	cher	5
FBgn0014143	0.901429	0.933273	protein_coding	croc	NA
FBgn0014163	1.95705e-07	2.38914e-06	protein_coding	fax	3
FBgn0014184	0.363552	0.515464	protein_coding	Oda	NA
FBgn0014189	0.300882	0.451239	protein_coding	Hel25E	NA
FBgn0014269	0.695418	0.795795	protein_coding	prod	NA
FBgn0014340	0.718474	0.811051	protein_coding	mof	NA
FBgn0014342	8.34731e-13	3.16893e-11	protein_coding	mia	5
FBgn0014343	0.000227206	0.00130819	protein_coding	mirr	2
FBgn0014366	0.837449	0.890887	protein_coding	noi	NA
FBgn0014380	0.19785	0.333583	protein_coding	RhoL	NA
FBgn0014388	0.701971	0.800076	protein_coding	sty	NA
FBgn0014391	0.487657	0.63078	protein_coding	sun	NA
FBgn0014395	0.000391747	0.00207816	protein_coding	tilB	5
FBgn0014396	0.000660398	0.00323921	protein_coding	tim	5
FBgn0014411	0.746504	0.83118	protein_coding	Vps26	NA
FBgn0014417	0.69611	0.796042	protein_coding	CG13397	NA
FBgn0014427	0.319805	0.470636	protein_coding	CG11899	NA
FBgn0014455	0.0180081	0.0518585	protein_coding	Ahcy	6
FBgn0014469	0.685711	0.78875	protein_coding	Cyp4e2	NA
FBgn0014857	0.0081961	0.0270758	protein_coding	His3.3A	7
FBgn0014859	0.711459	0.805993	protein_coding	Hr38	NA
FBgn0014861	4.93749e-05	0.000338307	protein_coding	Mcm2	1
FBgn0014863	0.00122056	0.00544689	protein_coding	Mlp84B	1
FBgn0014865	0.000756295	0.00363886	protein_coding	Mtk	4
FBgn0014868	0.0772514	0.163706	protein_coding	Ost48	NA
FBgn0014869	0.0324198	0.0832696	protein_coding	Pglym78	2
FBgn0014870	0.00697987	0.0236778	protein_coding	Psi	7
FBgn0014877	0.0134454	0.040888	protein_coding	Roe1	1
FBgn0014879	0.69569	0.795817	protein_coding	Set	NA
FBgn0014903	2.80794e-19	3.27792e-17	protein_coding	CG14630	1
FBgn0014906	0.107893	0.211329	protein_coding	Hydr2	NA
FBgn0014930	0.762071	0.840374	protein_coding	CG2846	NA
FBgn0014931	0.21319	0.352324	protein_coding	CG2678	NA
FBgn0015000	0.611473	0.733657	protein_coding	betaggt-I	NA
FBgn0015001	6.3993e-40	3.9842e-37	protein_coding	iotaTry	6
FBgn0015010	8.60371e-05	0.000551855	protein_coding	Ag5r	2
FBgn0015011	0.363679	0.515464	protein_coding	AhcyL2	NA
FBgn0015019	0.000513587	0.00262278	protein_coding	CCT3	7
FBgn0015024	0.000343003	0.00184955	protein_coding	CkIalpha	7
FBgn0015025	0.344235	0.495883	protein_coding	CkIIalpha-i1	NA
FBgn0015031	0.525529	0.662374	protein_coding	cype	NA
FBgn0015033	0.000114816	0.000713891	protein_coding	Cyp4d8	6
FBgn0015034	0.428776	0.577409	protein_coding	Cyp4e1	NA
FBgn0015035	0.606909	0.729838	protein_coding	Cyp4e3	NA
FBgn0015036	0.552919	0.684708	protein_coding	Cyp4ae1	NA
FBgn0015037	1.8181e-19	2.17683e-17	protein_coding	Cyp4p1	6
FBgn0015038	0.0217251	0.0602944	protein_coding	Cyp9b1	2
FBgn0015039	8.96675e-25	2.32612e-22	protein_coding	Cyp9b2	4
FBgn0015040	0.00152905	0.00659575	protein_coding	Cyp9c1	6
FBgn0015075	0.32717	0.47816	protein_coding	Ddx1	NA
FBgn0015218	0.13697	0.253547	protein_coding	eIF4E1	NA
FBgn0015221	0.0069895	0.0236847	protein_coding	Fer2LCH	1
FBgn0015222	0.00295548	0.0114814	protein_coding	Fer1HCH	1
FBgn0015229	0.774517	0.84857	protein_coding	glec	NA
FBgn0015239	0.151211	0.27325	protein_coding	Hr78	NA
FBgn0015240	2.14396e-07	2.58688e-06	protein_coding	Hr96	4
FBgn0015245	0.45969	0.606277	protein_coding	Hsp60A	NA
FBgn0015247	0.00323352	0.0123914	protein_coding	Diap2	6
FBgn0015268	4.74954e-19	5.33141e-17	protein_coding	Nap1	5
FBgn0015269	0.00870537	0.0284363	protein_coding	Nf1	2
FBgn0015270	0.00124134	0.00551518	protein_coding	Orc2	1
FBgn0015271	0.431153	0.579625	protein_coding	Orc5	NA
FBgn0015277	0.275263	0.422462	protein_coding	Pi3K59F	NA
FBgn0015278	0.458652	0.60517	protein_coding	Pi3K68D	NA
FBgn0015279	0.000219444	0.00126662	protein_coding	Pi3K92E	7
FBgn0015282	0.0322409	0.0829472	protein_coding	Rpt2	1
FBgn0015283	0.183959	0.316388	protein_coding	Rpn10	NA
FBgn0015286	4.98605e-13	2.01579e-11	protein_coding	Rala	1
FBgn0015288	6.02491e-12	1.96051e-10	protein_coding	RpL22	5
FBgn0015295	0.822473	0.88116	protein_coding	Shark	NA
FBgn0015296	3.33509e-11	8.92446e-10	protein_coding	Shc	1
FBgn0015298	0.424499	0.573387	protein_coding	Srp19	NA
FBgn0015299	0.00135018	0.00592544	protein_coding	Ssb-c31a	3
FBgn0015316	8.23288e-07	8.75705e-06	protein_coding	Try29F	6
FBgn0015320	1.06346e-06	1.08661e-05	protein_coding	Ubc2	1
FBgn0015321	0.831249	0.886669	protein_coding	Ubc4	NA
FBgn0015331	0.970141	0.981917	protein_coding	abs	NA
FBgn0015336	0.00107776	0.00492185	protein_coding	CG15865	1
FBgn0015338	0.521417	0.6592	protein_coding	CG5861	NA
FBgn0015351	2.09444e-16	1.5648e-14	protein_coding	CG14906	1
FBgn0015359	0.999318	0.999425	protein_coding	CG2034	NA
FBgn0015360	0.473212	0.618347	protein_coding	oxt	NA
FBgn0015371	0.0593347	0.133815	protein_coding	chn	NA
FBgn0015372	3.92405e-10	8.66353e-09	protein_coding	RabX1	1
FBgn0015376	0.000336539	0.00182411	protein_coding	cutlet	4
FBgn0015379	0.943244	0.962517	protein_coding	dod	NA
FBgn0015380	6.23396e-18	5.76425e-16	protein_coding	drl	6
FBgn0015391	0.450251	0.596564	protein_coding	glu	NA
FBgn0015393	0.0433232	0.104945	NA	NA	NA
FBgn0015396	0.0309931	0.0802452	protein_coding	jumu	7
FBgn0015399	0.072012	0.155209	protein_coding	kek1	NA
FBgn0015400	0.630981	0.749139	protein_coding	kek2	NA
FBgn0015402	0.795861	0.863647	protein_coding	ksr	NA
FBgn0015477	2.8053e-06	2.57102e-05	protein_coding	Rme-8	1
FBgn0015509	1.91047e-05	0.000144189	protein_coding	Cul1	1
FBgn0015513	1.13502e-06	1.15594e-05	protein_coding	mbc	5
FBgn0015519	0.0118071	0.0366698	protein_coding	nAChRalpha3	2
FBgn0015520	0.769305	0.84514	protein_coding	nonA-l	NA
FBgn0015521	0.00333729	0.0127005	protein_coding	RpS21	5
FBgn0015522	0.0505392	0.118055	protein_coding	olf186-M	NA
FBgn0015524	0.632587	0.750165	protein_coding	otp	NA
FBgn0015527	0.00115327	0.00521392	protein_coding	peng	5
FBgn0015544	5.0869e-07	5.69623e-06	protein_coding	spag	2
FBgn0015546	0.198995	0.334971	protein_coding	spel1	NA
FBgn0015550	0.00434411	0.0158767	protein_coding	tap	4
FBgn0015553	0.493815	0.635664	protein_coding	tos	NA
FBgn0015568	4.76238e-05	0.000328477	protein_coding	alpha-Est1	6
FBgn0015569	0.000653132	0.00321201	protein_coding	alpha-Est10	3
FBgn0015570	0.108114	0.211584	protein_coding	alpha-Est2	NA
FBgn0015571	0.326602	0.477554	protein_coding	alpha-Est3	NA
FBgn0015572	0.655201	0.766686	protein_coding	alpha-Est4	NA
FBgn0015574	0.289803	0.438864	protein_coding	alpha-Est6	NA
FBgn0015575	2.21301e-16	1.62734e-14	protein_coding	alpha-Est7	5
FBgn0015576	0.0252489	0.0680979	protein_coding	alpha-Est8	4
FBgn0015577	0.00199603	0.00827383	protein_coding	alpha-Est9	7
FBgn0015582	0.874117	0.916204	protein_coding	dare	NA
FBgn0015589	6.65879e-06	5.58728e-05	protein_coding	Apc	7
FBgn0015591	7.44857e-06	6.17233e-05	protein_coding	AstA	4
FBgn0015600	0.000675442	0.0032962	protein_coding	toc	5
FBgn0015602	0.747588	0.831695	protein_coding	BEAF-32	NA
FBgn0015609	0.805807	0.870294	protein_coding	CadN	NA
FBgn0015614	0.0405365	0.0998603	protein_coding	CanB2	1
FBgn0015615	0.472358	0.617636	protein_coding	SMC3	NA
FBgn0015618	0.0460785	0.110112	protein_coding	Cdk8	NA
FBgn0015621	0.597986	0.722456	protein_coding	Clp	NA
FBgn0015622	0.006724	0.0229683	protein_coding	Cnx99A	1
FBgn0015623	0.734415	0.82209	protein_coding	Cpr	NA
FBgn0015625	0.281214	0.429759	protein_coding	CycB3	NA
FBgn0015663	0.24638	0.390718	protein_coding	Ugt36A1	NA
FBgn0015664	0.709754	0.80517	protein_coding	Dref	NA
FBgn0015714	0.144798	0.264099	protein_coding	Cyp6a17	NA
FBgn0015721	0.0455603	0.109295	protein_coding	ktub	NA
FBgn0015737	0.076896	0.163138	protein_coding	Hmu	NA
FBgn0015754	0.00236623	0.00953333	protein_coding	Lis-1	7
FBgn0015756	8.36344e-14	3.82873e-12	protein_coding	RpL9	5
FBgn0015765	0.000915467	0.00429194	protein_coding	p38a	1
FBgn0015766	0.0567262	0.129096	protein_coding	Msr-110	NA
FBgn0015772	0.0059292	0.0206307	protein_coding	Nak	7
FBgn0015773	0.00955327	0.0308073	protein_coding	NetA	1
FBgn0015774	0.714681	0.808407	protein_coding	NetB	NA
FBgn0015776	0.92956	0.952299	protein_coding	nrv1	NA
FBgn0015777	0.285973	0.434614	protein_coding	nrv2	NA
FBgn0015778	0.0333387	0.0852313	protein_coding	rin	7
FBgn0015781	0.16233	0.288487	protein_coding	P5cr	NA
FBgn0015789	0.00617724	0.0213506	protein_coding	Rab10	1
FBgn0015790	0.0248227	0.0671745	protein_coding	Rab11	1
FBgn0015791	0.00227546	0.00924336	protein_coding	Rab14	1
FBgn0015793	0.0564715	0.128694	protein_coding	Rab19	NA
FBgn0015794	0.0019574	0.00814985	protein_coding	Rab18	1
FBgn0015795	0.000205218	0.00119858	protein_coding	Rab7	7
FBgn0015797	9.09044e-07	9.53883e-06	protein_coding	Rab6	7
FBgn0015799	0.210057	0.348521	protein_coding	Rbf	NA
FBgn0015801	4.78666e-09	8.27826e-08	protein_coding	Reg-5	6
FBgn0015803	9.72601e-08	1.26154e-06	protein_coding	RtGEF	7
FBgn0015805	0.00757886	0.0253779	protein_coding	HDAC1	1
FBgn0015808	0.0402756	0.0994549	protein_coding	ScpX	1
FBgn0015818	0.673848	0.780446	protein_coding	Spx	NA
FBgn0015828	0.339355	0.491049	protein_coding	TfIIEalpha	NA
FBgn0015829	0.0157769	0.0464503	protein_coding	TfIIEbeta	4
FBgn0015834	3.44871e-07	4.02091e-06	protein_coding	eIF3i	5
FBgn0015838	0.420992	0.569968	protein_coding	Vang	NA
FBgn0015872	0.0333001	0.0851561	protein_coding	Drip	6
FBgn0015903	0.00867239	0.0283584	protein_coding	apt	7
FBgn0015904	0.0451582	0.108598	protein_coding	ara	NA
FBgn0015905	0.000261907	0.00147791	protein_coding	ast	5
FBgn0015919	0.000610702	0.00303208	protein_coding	caup	2
FBgn0015924	0.0951909	0.192311	protein_coding	crq	NA
FBgn0015925	0.231609	0.373897	protein_coding	csul	NA
FBgn0015929	1.16431e-07	1.48952e-06	protein_coding	dpa	1
FBgn0015949	0.00645242	0.0221786	protein_coding	hrg	5
FBgn0016013	0.248876	0.393541	protein_coding	Faa	NA
FBgn0016031	8.55107e-05	0.000548855	protein_coding	lama	1
FBgn0016032	0.00904624	0.029416	protein_coding	lbm	4
FBgn0016034	0.000402181	0.00212442	protein_coding	mael	1
FBgn0016038	0.558689	0.689814	protein_coding	Vsp37A	NA
FBgn0016041	0.0153361	0.0454037	protein_coding	Tom40	5
FBgn0016053	0.377442	0.529483	protein_coding	pgc	NA
FBgn0016054	0.563008	0.693567	protein_coding	phr6-4	NA
FBgn0016059	0.027731	0.0732995	protein_coding	Sema1b	1
FBgn0016061	0.00748366	0.0251041	protein_coding	side	1
FBgn0016070	0.54609	0.679629	protein_coding	smg	NA
FBgn0016075	0.0453393	0.108905	protein_coding	vkg	NA
FBgn0016076	0.0140379	0.0424683	protein_coding	vri	2
FBgn0016078	1.88494e-05	0.000142654	protein_coding	wun	5
FBgn0016080	0.502634	0.64294	NA	NA	NA
FBgn0016081	1.83082e-06	1.75905e-05	protein_coding	fry	1
FBgn0016119	0.182601	0.314767	protein_coding	ATPsynCF6	NA
FBgn0016120	0.00798098	0.0265058	protein_coding	ATPsynD	5
FBgn0016122	0.737361	0.824596	protein_coding	Acer	NA
FBgn0016123	0.386468	0.537288	protein_coding	Alp4	NA
FBgn0016126	9.698e-07	1.00857e-05	protein_coding	CaMKI	4
FBgn0016131	0.0435351	0.105357	protein_coding	Cdk4	NA
FBgn0016641	0.644642	0.758631	protein_coding	PTP-ER	NA
FBgn0016650	0.947759	0.965858	protein_coding	Lgr1	NA
FBgn0016672	9.46961e-06	7.71699e-05	protein_coding	Ipp	6
FBgn0016684	0.319403	0.470193	protein_coding	NaPi-T	NA
FBgn0016685	0.0293669	0.0768658	protein_coding	Nlp	5
FBgn0016687	0.000980892	0.00455296	protein_coding	Nurf-38	5
FBgn0016691	0.220697	0.361467	protein_coding	ATPsynO	NA
FBgn0016693	5.47403e-13	2.17443e-11	protein_coding	Past1	1
FBgn0016694	0.0385068	0.0958463	protein_coding	Pdp1	5
FBgn0016696	0.0187528	0.0534267	protein_coding	Pitslre	5
FBgn0016697	0.000734651	0.00354936	protein_coding	Prosalpha5	1
FBgn0016698	0.198793	0.334812	protein_coding	Ptpa	NA
FBgn0016701	0.57588	0.704684	protein_coding	Rab4	NA
FBgn0016715	2.26827e-09	4.26226e-08	protein_coding	Reg-2	6
FBgn0016726	0.00146074	0.00633621	protein_coding	RpL29	5
FBgn0016754	0.000397072	0.00210219	protein_coding	sba	7
FBgn0016756	0.000326673	0.00178097	protein_coding	Usp47	5
FBgn0016762	0.310335	0.461178	protein_coding	angel	NA
FBgn0016794	0.125075	0.236795	protein_coding	dos	NA
FBgn0016797	0.0672532	0.147263	protein_coding	fz2	NA
FBgn0016917	0.151936	0.274243	protein_coding	Stat92E	NA
FBgn0016920	0.00703183	0.0238108	protein_coding	nompC	2
FBgn0016926	7.85191e-05	0.00050817	protein_coding	Pino	3
FBgn0016930	0.498334	0.639211	protein_coding	Dyrk2	NA
FBgn0016970	0.20512	0.342748	protein_coding	l(2)k10201	NA
FBgn0016975	0.000351546	0.00188683	protein_coding	stnB	4
FBgn0016976	0.000351546	0.00188683	protein_coding	stnA	4
FBgn0016977	0.00814496	0.026945	protein_coding	spen	2
FBgn0016978	0.941039	0.960897	protein_coding	snRNP-U1-70K	NA
FBgn0016983	0.404587	0.554593	protein_coding	smid	NA
FBgn0016984	0.000506705	0.00259579	protein_coding	sktl	7
FBgn0017414	0.46403	0.61062	protein_coding	cag	NA
FBgn0017418	0.928811	0.952159	protein_coding	ari-1	NA
FBgn0017424	0.831507	0.886669	ncRNA	asRNA:CR11538	NA
FBgn0017429	0.574672	0.703482	protein_coding	CG5989	NA
FBgn0017430	0.543768	0.677461	protein_coding	Nelf-E	NA
FBgn0017448	0.423415	0.572005	protein_coding	CG2187	NA
FBgn0017457	0.167701	0.294723	protein_coding	U2af38	NA
FBgn0017482	0.000342556	0.00184955	protein_coding	T3dh	6
FBgn0017545	4.36825e-12	1.46219e-10	protein_coding	RpS3A	5
FBgn0017550	0.188521	0.322556	protein_coding	Rga	NA
FBgn0017551	0.779896	0.852402	protein_coding	Rca1	NA
FBgn0017558	0.00460793	0.0166861	protein_coding	Pdk	6
FBgn0017561	5.86954e-09	9.94839e-08	protein_coding	Ork1	2
FBgn0017566	0.0228103	0.0628395	protein_coding	ND-75	5
FBgn0017567	0.118033	0.22672	protein_coding	ND-23	NA
FBgn0017572	0.146685	0.266879	protein_coding	Mo25	NA
FBgn0017577	8.70958e-08	1.14562e-06	protein_coding	Mcm5	1
FBgn0017578	1.39427e-05	0.000108781	protein_coding	Max	5
FBgn0017579	8.09188e-09	1.32812e-07	protein_coding	RpL14	5
FBgn0017581	0.000917303	0.00429839	protein_coding	Lk6	5
FBgn0017590	0.00110413	0.00502753	protein_coding	klg	4
FBgn0019624	0.613854	0.735161	protein_coding	COX5A	NA
FBgn0019637	0.285762	0.43454	protein_coding	Atu	NA
FBgn0019643	0.464499	0.610894	protein_coding	AANAT1	NA
FBgn0019644	0.0502375	0.117527	protein_coding	ATPsynB	NA
FBgn0019662	7.26181e-12	2.31461e-10	protein_coding	qm	1
FBgn0019686	0.344333	0.495948	protein_coding	lok	NA
FBgn0019830	1.03326e-06	1.06508e-05	protein_coding	colt	6
FBgn0019890	0.000475275	0.00245769	protein_coding	Smg5	7
FBgn0019925	0.15913	0.284285	protein_coding	Surf4	NA
FBgn0019928	9.01041e-09	1.466e-07	protein_coding	Ser8	1
FBgn0019929	0.174806	0.304857	protein_coding	Ser7	NA
FBgn0019932	0.273256	0.420211	protein_coding	SamDC	NA
FBgn0019936	1.34947e-08	2.10045e-07	protein_coding	RpS20	5
FBgn0019938	2.02849e-05	0.000152039	protein_coding	RpI1	5
FBgn0019949	0.0606811	0.135932	protein_coding	Cdk9	NA
FBgn0019952	0.00923438	0.0299132	protein_coding	Orct	4
FBgn0019957	0.263697	0.409352	protein_coding	ND-42	NA
FBgn0019960	0.800202	0.867155	protein_coding	Mitofilin	NA
FBgn0019968	0.0557543	0.127388	protein_coding	Khc-73	NA
FBgn0019972	4.65906e-05	0.000322782	protein_coding	Drice	7
FBgn0019982	0.23057	0.372994	protein_coding	Gs1l	NA
FBgn0019990	0.29277	0.442066	protein_coding	Gcn2	NA
FBgn0020018	0.607538	0.730124	protein_coding	Ppox	NA
FBgn0020224	0.017078	0.0495932	protein_coding	Cbl	7
FBgn0020235	0.403856	0.553996	protein_coding	ATPsyngamma	NA
FBgn0020236	0.617705	0.738447	protein_coding	ATPCL	NA
FBgn0020238	0.00460103	0.0166676	protein_coding	14-3-3epsilon	1
FBgn0020249	0.120545	0.229842	protein_coding	stck	NA
FBgn0020251	0.0666414	0.146198	protein_coding	sfl	NA
FBgn0020255	0.354607	0.506063	protein_coding	Ran	NA
FBgn0020257	0.000101343	0.000640352	protein_coding	Ppa	1
FBgn0020258	0.985475	0.991313	protein_coding	ppk	NA
FBgn0020261	0.0464358	0.110724	protein_coding	pcm	NA
FBgn0020270	0.030721	0.0796954	protein_coding	mre11	6
FBgn0020272	0.00300034	0.0116218	protein_coding	mst	1
FBgn0020278	8.92629e-07	9.37712e-06	protein_coding	loco	1
FBgn0020279	0.00111775	0.00507399	protein_coding	lig	7
FBgn0020294	0.0399088	0.0988093	protein_coding	ko	6
FBgn0020299	0.514342	0.652641	protein_coding	stumps	NA
FBgn0020300	0.0957174	0.193134	protein_coding	geko	NA
FBgn0020304	0.500688	0.641598	protein_coding	drongo	NA
FBgn0020305	0.52705	0.663627	protein_coding	dbe	NA
FBgn0020306	2.22115e-13	9.55912e-12	protein_coding	dom	5
FBgn0020307	5.35832e-05	0.000362881	protein_coding	dve	5
FBgn0020309	0.0610889	0.136551	protein_coding	crol	NA
FBgn0020312	0.0908374	0.185915	protein_coding	Tmtc3	NA
FBgn0020369	5.64471e-05	0.000380621	protein_coding	Rpt6	1
FBgn0020370	0.850875	0.899837	protein_coding	TppII	NA
FBgn0020379	0.126787	0.239205	protein_coding	Rfx	NA
FBgn0020381	0.417287	0.566431	protein_coding	Dredd	NA
FBgn0020385	0.000198416	0.00116615	protein_coding	pug	5
FBgn0020386	0.356687	0.50805	protein_coding	Pdk1	NA
FBgn0020388	5.55384e-06	4.76722e-05	protein_coding	Gcn5	1
FBgn0020389	0.0260902	0.0697962	protein_coding	Papss	1
FBgn0020391	0.900684	0.932848	protein_coding	Nrk	NA
FBgn0020392	0.38757	0.538218	protein_coding	Nmt	NA
FBgn0020407	0.112208	0.217906	protein_coding	asun	NA
FBgn0020412	0.00208783	0.00861228	protein_coding	JIL-1	5
FBgn0020414	0.412328	0.561331	protein_coding	Idgf3	NA
FBgn0020415	0.0537425	0.123926	protein_coding	Idgf2	NA
FBgn0020416	0.230304	0.372693	protein_coding	Idgf1	NA
FBgn0020440	0.120384	0.229612	protein_coding	Fak	NA
FBgn0020443	0.120399	0.229612	protein_coding	eRF3	NA
FBgn0020445	0.942266	0.961834	protein_coding	E23	NA
FBgn0020493	0.468015	0.613616	protein_coding	Dad	NA
FBgn0020496	0.0013046	0.00575245	protein_coding	CtBP	1
FBgn0020497	0.0265204	0.0707237	protein_coding	emb	5
FBgn0020503	0.0782118	0.165441	protein_coding	CLIP-190	NA
FBgn0020506	1.80043e-05	0.00013727	protein_coding	Amyrel	4
FBgn0020508	1.87971e-05	0.000142373	protein_coding	Ag5r2	4
FBgn0020510	0.000207596	0.0012102	protein_coding	Abi	1
FBgn0020513	0.00959556	0.030933	protein_coding	Paics	5
FBgn0020521	2.54768e-09	4.74907e-08	protein_coding	pio	2
FBgn0020545	0.135997	0.252144	protein_coding	kraken	NA
FBgn0020616	0.543403	0.677458	protein_coding	SA	NA
FBgn0020618	1.70371e-15	1.01343e-13	protein_coding	Rack1	5
FBgn0020620	0.0478938	0.113408	protein_coding	RN-tre	NA
FBgn0020621	0.0028044	0.0109951	protein_coding	Pkn	7
FBgn0020622	1.97619e-10	4.56824e-09	protein_coding	Pi3K21B	1
FBgn0020626	0.000157606	0.000947766	protein_coding	Osbp	1
FBgn0020633	0.000373747	0.00199225	protein_coding	Mcm7	1
FBgn0020647	0.045165	0.108598	protein_coding	KrT95D	NA
FBgn0020653	0.0990162	0.198223	protein_coding	Trxr-1	NA
FBgn0020655	0.940034	0.960396	protein_coding	ArfGAP1	NA
FBgn0020660	0.37545	0.528112	protein_coding	eIF4B	NA
FBgn0020762	0.00499265	0.0178713	protein_coding	Atet	1
FBgn0020764	0.109186	0.213233	protein_coding	Alas	NA
FBgn0020767	0.0123103	0.0379426	protein_coding	Spred	1
FBgn0020880	0.267719	0.413944	protein_coding	CG7179	NA
FBgn0020887	0.529211	0.665809	protein_coding	Su(z)12	NA
FBgn0020906	0.132451	0.247343	protein_coding	Jon25Bi	NA
FBgn0020907	0.0531112	0.122835	protein_coding	Scp2	NA
FBgn0020908	0.00170244	0.00724001	protein_coding	Scp1	2
FBgn0020909	0.445227	0.592612	protein_coding	Rtc1	NA
FBgn0020910	5.87243e-12	1.91757e-10	protein_coding	RpL3	5
FBgn0020912	3.49109e-07	4.06524e-06	protein_coding	Ptx1	5
FBgn0020930	0.324443	0.475738	protein_coding	Dgkepsilon	NA
FBgn0021750	0.0507493	0.118353	protein_coding	SerRS-m	NA
FBgn0021760	0.0291639	0.0764416	protein_coding	chb	5
FBgn0021761	3.37369e-05	0.000240936	protein_coding	Nup154	6
FBgn0021764	3.11929e-14	1.53321e-12	protein_coding	sdk	1
FBgn0021765	0.0844921	0.17625	protein_coding	scu	NA
FBgn0021767	0.299718	0.449938	protein_coding	org-1	NA
FBgn0021768	0.488806	0.631566	protein_coding	nudC	NA
FBgn0021776	0.0015954	0.00684403	protein_coding	mira	5
FBgn0021795	0.108442	0.212004	protein_coding	Tapdelta	NA
FBgn0021796	0.853268	0.901085	protein_coding	Tor	NA
FBgn0021800	0.0581852	0.131604	protein_coding	Reph	NA
FBgn0021814	1.10716e-05	8.89823e-05	protein_coding	Vps28	1
FBgn0021825	0.0401541	0.0992061	protein_coding	DCTN2-p50	1
FBgn0021847	0.328821	0.479522	protein_coding	Ttc7	NA
FBgn0021856	0.752342	0.834853	protein_coding	l(2)k14505	NA
FBgn0021872	0.064775	0.142977	protein_coding	Xbp1	NA
FBgn0021874	0.0423269	0.103506	protein_coding	Nle	NA
FBgn0021875	0.337585	0.488943	protein_coding	Zfrp8	NA
FBgn0021895	0.0970108	0.195016	protein_coding	ytr	NA
FBgn0021906	0.192014	0.326869	protein_coding	RFeSP	NA
FBgn0021944	1.708e-05	0.000131284	protein_coding	Coprox	5
FBgn0021967	0.000518213	0.0026417	protein_coding	ND-PDSW	5
FBgn0021979	0.000582233	0.0029171	protein_coding	l(2)k09913	6
FBgn0021995	1.83788e-05	0.000139885	protein_coding	Rs1	5
FBgn0022023	1.34928e-12	4.94153e-11	protein_coding	eIF3h	5
FBgn0022027	0.00230698	0.00934703	protein_coding	Vps25	4
FBgn0022029	0.000508099	0.00260008	protein_coding	l(2)k01209	5
FBgn0022069	0.000183615	0.00108806	protein_coding	Nnp-1	5
FBgn0022097	0.0216641	0.0601429	protein_coding	Vha36-1	3
FBgn0022153	0.758835	0.83867	protein_coding	l(2)k05819	NA
FBgn0022160	0.1032	0.20452	protein_coding	Gpo1	NA
FBgn0022213	0.100564	0.200624	protein_coding	Cse1	NA
FBgn0022224	0.118381	0.227014	protein_coding	ubl	NA
FBgn0022238	0.107292	0.210637	protein_coding	lolal	NA
FBgn0022288	0.000207948	0.00121074	protein_coding	l(2)09851	5
FBgn0022338	2.43431e-11	6.78628e-10	protein_coding	dnk	1
FBgn0022343	0.00246704	0.00985914	protein_coding	CG3760	5
FBgn0022344	0.103455	0.204782	protein_coding	CG10340	NA
FBgn0022349	0.0206568	0.0578104	protein_coding	CG1910	7
FBgn0022355	0.0050873	0.0181545	protein_coding	Tsf1	4
FBgn0022359	0.343011	0.494742	protein_coding	Sodh-2	NA
FBgn0022361	2.99133e-06	2.73615e-05	protein_coding	Pur-alpha	4
FBgn0022382	0.400592	0.550814	protein_coding	Pka-R2	NA
FBgn0022699	0.00730789	0.0245763	protein_coding	D19B	5
FBgn0022700	0.134947	0.250946	protein_coding	Cht4	NA
FBgn0022702	0.683777	0.787591	protein_coding	Cht2	NA
FBgn0022709	0.343437	0.495019	protein_coding	Adk1	NA
FBgn0022710	0.000333726	0.00181201	protein_coding	Ac13E	6
FBgn0022724	0.730113	0.819015	protein_coding	Taf8	NA
FBgn0022740	0.195745	0.331471	protein_coding	HLH54F	NA
FBgn0022764	1.91574e-05	0.000144283	protein_coding	Sin3A	5
FBgn0022768	0.257598	0.403299	protein_coding	Pp2C1	NA
FBgn0022770	4.05862e-07	4.63935e-06	protein_coding	Peritrophin-A	6
FBgn0022772	0.015053	0.044728	NA	NA	1
FBgn0022774	3.09594e-06	2.82078e-05	protein_coding	Oat	4
FBgn0022786	0.327956	0.478634	protein_coding	Hira	NA
FBgn0022787	0.685324	0.788626	protein_coding	Hel89B	NA
FBgn0022800	0.0712468	0.15395	protein_coding	Cad96Ca	NA
FBgn0022893	4.87146e-05	0.000335259	protein_coding	Df31	1
FBgn0022935	0.000786694	0.00376573	protein_coding	D19A	5
FBgn0022936	0.121448	0.231236	protein_coding	CycH	NA
FBgn0022942	0.412027	0.561003	protein_coding	Cbp80	NA
FBgn0022943	0.684629	0.788282	protein_coding	Cbp20	NA
FBgn0022959	4.39397e-05	0.000306234	protein_coding	yps	5
FBgn0022960	0.00709123	0.0239946	protein_coding	vimar	1
FBgn0022984	0.135381	0.251406	protein_coding	qkr58E-3	NA
FBgn0022985	0.129315	0.242553	protein_coding	qkr58E-2	NA
FBgn0022986	0.135989	0.252144	protein_coding	qkr58E-1	NA
FBgn0022987	0.445728	0.592886	protein_coding	qkr54B	NA
FBgn0023000	0.874414	0.916413	protein_coding	mth	NA
FBgn0023001	0.241505	0.385203	protein_coding	melt	NA
FBgn0023023	0.00128979	0.00569519	protein_coding	CRMP	2
FBgn0023076	0.000419021	0.00220092	protein_coding	Clk	2
FBgn0023081	0.728584	0.818113	protein_coding	gek	NA
FBgn0023083	0.599363	0.723184	protein_coding	fray	NA
FBgn0023091	0.00200372	0.00829466	protein_coding	dimm	7
FBgn0023094	0.442661	0.590235	protein_coding	cyc	NA
FBgn0023095	6.68811e-11	1.71124e-09	protein_coding	caps	7
FBgn0023097	0.349953	0.501106	protein_coding	bon	NA
FBgn0023129	0.0409184	0.100695	protein_coding	aay	NA
FBgn0023130	0.0538978	0.124192	protein_coding	a6	NA
FBgn0023143	2.61334e-07	3.10905e-06	protein_coding	Uba1	7
FBgn0023167	0.860573	0.906178	protein_coding	SmD3	NA
FBgn0023169	0.000608583	0.00302317	protein_coding	AMPKalpha	5
FBgn0023170	0.000242544	0.00138201	protein_coding	RpL39	6
FBgn0023171	4.55099e-06	3.98788e-05	protein_coding	rnh1	6
FBgn0023172	2.16007e-05	0.000160868	protein_coding	RhoGEF2	7
FBgn0023174	0.717616	0.810474	protein_coding	Prosbeta2	NA
FBgn0023175	0.0951979	0.192311	protein_coding	Prosalpha7	NA
FBgn0023177	2.02841e-08	3.04996e-07	protein_coding	Pp4-19C	1
FBgn0023179	0.643572	0.758017	protein_coding	amon	NA
FBgn0023180	0.0377394	0.0943131	protein_coding	Orc6	1
FBgn0023181	0.385876	0.536824	protein_coding	Orc4	NA
FBgn0023197	0.00264981	0.0104637	protein_coding	Jon74E	5
FBgn0023212	0.000106931	0.00066977	protein_coding	EloB	5
FBgn0023213	0.190439	0.324604	protein_coding	eIF4G1	NA
FBgn0023214	3.77202e-10	8.36744e-09	protein_coding	edl	1
FBgn0023215	0.0550861	0.1264	protein_coding	Mnt	NA
FBgn0023216	0.968847	0.981033	protein_coding	Parg	NA
FBgn0023388	0.0655912	0.144369	protein_coding	Dap160	NA
FBgn0023395	0.186095	0.319239	protein_coding	Chd3	NA
FBgn0023407	0.883651	0.92216	protein_coding	B4	NA
FBgn0023441	0.0196945	0.0555504	protein_coding	fus	2
FBgn0023458	0.00344618	0.0130457	protein_coding	Rbcn-3A	1
FBgn0023477	0.0512733	0.119316	protein_coding	Taldo	NA
FBgn0023479	0.0288624	0.0757642	protein_coding	teq	2
FBgn0023495	9.95831e-12	3.11039e-10	protein_coding	Lip3	4
FBgn0023506	0.940963	0.960897	protein_coding	Es2	NA
FBgn0023507	0.754825	0.836614	protein_coding	D2hgdh	NA
FBgn0023508	0.000259766	0.00146761	protein_coding	Ocrl	7
FBgn0023509	0.00199734	0.00827559	protein_coding	mip130	6
FBgn0023510	0.428534	0.577168	protein_coding	Rbcn-3B	NA
FBgn0023511	0.421243	0.57006	protein_coding	Edem1	NA
FBgn0023512	0.913638	0.941565	protein_coding	eIF2Bepsilon	NA
FBgn0023513	0.800359	0.867155	protein_coding	CG14803	NA
FBgn0023514	0.0565713	0.128858	protein_coding	CG14805	NA
FBgn0023515	0.0143031	0.0430892	protein_coding	CG14814	3
FBgn0023516	0.0358317	0.0902705	protein_coding	Pex5	6
FBgn0023517	0.167201	0.294173	protein_coding	Pgam5	NA
FBgn0023518	0.21167	0.350333	protein_coding	trr	NA
FBgn0023519	0.390701	0.541388	protein_coding	mRpL16	NA
FBgn0023520	0.415581	0.564772	protein_coding	CG3857	NA
FBgn0023521	0.973432	0.98393	protein_coding	CG3587	NA
FBgn0023522	0.789876	0.859249	protein_coding	CG11596	NA
FBgn0023525	0.000897857	0.0042221	protein_coding	CG3191	6
FBgn0023526	0.253719	0.399104	protein_coding	CG2865	NA
FBgn0023527	0.0744287	0.159278	protein_coding	CG3071	NA
FBgn0023528	0.000243963	0.00138925	protein_coding	CG2924	1
FBgn0023529	0.00628884	0.0216962	protein_coding	CG2918	2
FBgn0023530	2.16685e-11	6.26508e-10	protein_coding	CG3740	4
FBgn0023531	0.12274	0.233124	protein_coding	CG32809	NA
FBgn0023534	0.495917	0.636965	protein_coding	CG17778	NA
FBgn0023535	0.609229	0.731875	protein_coding	arg	NA
FBgn0023536	0.346142	0.497556	protein_coding	CG3156	NA
FBgn0023537	7.94311e-06	6.55307e-05	protein_coding	CG17896	1
FBgn0023540	0.0264625	0.0706094	protein_coding	CG3630	6
FBgn0023541	0.557623	0.68875	protein_coding	Cyp4d14	NA
FBgn0023542	3.53371e-14	1.72782e-12	protein_coding	Nmd3	5
FBgn0023545	0.000448306	0.00233895	protein_coding	PIG-K	6
FBgn0023549	0.000209265	0.00121689	protein_coding	Mct1	6
FBgn0023550	0.0766523	0.162769	protein_coding	FarO	NA
FBgn0024150	0.56319	0.6937	protein_coding	Ac78C	NA
FBgn0024179	1.29814e-10	3.08481e-09	protein_coding	wit	5
FBgn0024182	0.416678	0.565851	protein_coding	waw	NA
FBgn0024183	0.0100013	0.0319981	protein_coding	vig	5
FBgn0024187	0.0947583	0.191713	protein_coding	syd	NA
FBgn0024188	0.651486	0.763967	protein_coding	san	NA
FBgn0024191	0.894281	0.928894	protein_coding	sip1	NA
FBgn0024194	0.183459	0.315878	protein_coding	rasp	NA
FBgn0024196	0.00241942	0.00970156	protein_coding	robl	4
FBgn0024222	0.0830787	0.174158	protein_coding	IKKbeta	NA
FBgn0024227	2.04815e-05	0.000153389	protein_coding	aurB	1
FBgn0024230	0.03151	0.081358	protein_coding	Hs2st	4
FBgn0024234	0.144042	0.263043	protein_coding	gbb	NA
FBgn0024236	2.86329e-13	1.20452e-11	protein_coding	foi	5
FBgn0024238	0.0340072	0.0865848	protein_coding	Fim	1
FBgn0024244	0.0303172	0.0788668	protein_coding	drm	3
FBgn0024245	0.0308426	0.0799221	protein_coding	dnt	4
FBgn0024248	0.00281919	0.0110438	protein_coding	chico	5
FBgn0024250	0.0438744	0.105986	protein_coding	brk	NA
FBgn0024251	0.344695	0.496211	protein_coding	bbx	NA
FBgn0024273	0.000230596	0.00132059	protein_coding	WASp	7
FBgn0024277	1.7406e-05	0.00013346	protein_coding	trio	7
FBgn0024285	0.000512586	0.00262016	protein_coding	Srp54	7
FBgn0024288	2.8531e-09	5.26583e-08	protein_coding	Sox100B	1
FBgn0024289	0.0012444	0.0055235	protein_coding	Sodh-1	3
FBgn0024291	0.0425649	0.103844	protein_coding	Sirt1	NA
FBgn0024293	0.467426	0.613308	protein_coding	Spn43Ab	NA
FBgn0024314	0.0616996	0.137685	protein_coding	Plap	NA
FBgn0024315	6.10461e-05	0.00040664	protein_coding	Picot	2
FBgn0024319	0.00535274	0.0189353	protein_coding	Nach	1
FBgn0024320	0.00748733	0.0251074	protein_coding	Npc1a	1
FBgn0024321	2.23532e-07	2.69016e-06	protein_coding	NK7.1	1
FBgn0024326	0.0737859	0.158288	protein_coding	Mkk4	NA
FBgn0024329	0.134972	0.250946	protein_coding	Mekk1	NA
FBgn0024330	0.243809	0.387693	protein_coding	MED6	NA
FBgn0024352	0.740841	0.826561	protein_coding	Stip1	NA
FBgn0024360	0.428897	0.577413	protein_coding	MTPAP	NA
FBgn0024361	9.25579e-06	7.56254e-05	protein_coding	Tsp2A	1
FBgn0024362	0.488403	0.631219	protein_coding	Naa30A	NA
FBgn0024364	3.86523e-09	6.86263e-08	protein_coding	CG11417	5
FBgn0024365	0.315818	0.466829	protein_coding	CG12773	NA
FBgn0024366	0.52828	0.664973	protein_coding	CG11409	NA
FBgn0024371	0.117996	0.226695	protein_coding	E2f2	NA
FBgn0024432	0.0011541	0.00521392	protein_coding	Dlc90F	4
FBgn0024491	0.0810579	0.170534	protein_coding	Bin1	NA
FBgn0024509	0.114418	0.221048	protein_coding	Sec13	NA
FBgn0024510	2.48466e-05	0.000182423	protein_coding	dlt	1
FBgn0024542	0.38373	0.534714	protein_coding	Neos	NA
FBgn0024555	0.803944	0.869374	protein_coding	flfl	NA
FBgn0024556	0.0476877	0.113034	protein_coding	mEFTu1	NA
FBgn0024558	0.00123966	0.00551375	protein_coding	Dph5	5
FBgn0024689	0.734169	0.821913	protein_coding	fws	NA
FBgn0024698	0.661006	0.770775	protein_coding	Cpsf160	NA
FBgn0024728	0.234582	0.377393	protein_coding	Slip1	NA
FBgn0024732	0.00737694	0.0247907	protein_coding	Drep1	4
FBgn0024733	2.43975e-06	2.2762e-05	protein_coding	RpL10	5
FBgn0024734	0.100614	0.200649	protein_coding	PRL-1	NA
FBgn0024754	0.138418	0.255623	protein_coding	Flo1	NA
FBgn0024804	0.00400562	0.0147918	protein_coding	Dbp80	1
FBgn0024806	0.062732	0.139257	protein_coding	DIP2	NA
FBgn0024807	0.000141608	0.000861547	protein_coding	DIP1	2
FBgn0024811	0.0858465	0.17816	protein_coding	Crk	NA
FBgn0024814	0.0286977	0.0754527	protein_coding	Clc	7
FBgn0024833	0.00375791	0.0140324	protein_coding	AP-1mu	1
FBgn0024841	0.0169271	0.0492468	protein_coding	Pcd	3
FBgn0024846	0.00249923	0.00996258	protein_coding	p38b	6
FBgn0024887	0.190655	0.324913	protein_coding	kin17	NA
FBgn0024889	0.337019	0.488503	protein_coding	Kap-alpha1	NA
FBgn0024909	0.366284	0.518292	protein_coding	Taf7	NA
FBgn0024912	0.63673	0.753284	protein_coding	agt	NA
FBgn0024913	0.390068	0.540883	protein_coding	Actbeta	NA
FBgn0024920	1.04857e-08	1.67464e-07	protein_coding	Ts	1
FBgn0024921	0.00968293	0.0311501	protein_coding	Tnpo	1
FBgn0024945	0.298119	0.448186	protein_coding	NitFhit	NA
FBgn0024947	0.0198312	0.0558516	protein_coding	NTPase	4
FBgn0024956	0.377279	0.529408	protein_coding	Mat1	NA
FBgn0024957	4.68184e-05	0.000324119	protein_coding	Irp-1B	1
FBgn0024958	0.526976	0.663624	protein_coding	Irp-1A	NA
FBgn0024973	0.380898	0.532648	protein_coding	CG2701	NA
FBgn0024975	0.493552	0.635496	protein_coding	CG2712	NA
FBgn0024980	0.000526973	0.00268196	protein_coding	Syx4	4
FBgn0024983	0.174987	0.30506	protein_coding	CG4293	NA
FBgn0024985	0.017683	0.0510957	protein_coding	Rilpl	7
FBgn0024986	2.24918e-06	2.11959e-05	protein_coding	CG3719	1
FBgn0024987	0.0237556	0.0649644	protein_coding	ssx	5
FBgn0024989	0.0472138	0.112167	protein_coding	CG3777	NA
FBgn0024991	0.561264	0.692149	protein_coding	CG2694	NA
FBgn0024992	0.889364	0.926363	protein_coding	Spg7	NA
FBgn0024993	0.188083	0.322177	protein_coding	CG2662	NA
FBgn0024994	0.209505	0.348081	protein_coding	Ugalt	NA
FBgn0024995	0.396807	0.547463	protein_coding	CG2680	NA
FBgn0024996	0.676596	0.782082	protein_coding	eIF2Bbeta	NA
FBgn0024997	0.00238483	0.00957931	protein_coding	CG2681	6
FBgn0024998	0.528333	0.664973	protein_coding	CG2685	NA
FBgn0025109	0.971318	0.982682	protein_coding	Bem46	NA
FBgn0025111	0.265449	0.411184	protein_coding	Ant2	NA
FBgn0025185	0.709254	0.805128	protein_coding	az2	NA
FBgn0025186	0.120632	0.229962	protein_coding	ari-2	NA
FBgn0025335	0.00227167	0.00923201	protein_coding	Cpes	1
FBgn0025336	0.0164389	0.0480962	protein_coding	CG4882	5
FBgn0025352	0.792501	0.86144	protein_coding	Mtpbeta	NA
FBgn0025355	0.000179039	0.00106296	protein_coding	SuUR	1
FBgn0025366	5.57143e-10	1.17718e-08	protein_coding	Ip259	5
FBgn0025373	0.00116258	0.00524386	protein_coding	Fpps	4
FBgn0025381	0.00115702	0.00522252	protein_coding	rush	7
FBgn0025383	0.315939	0.466933	protein_coding	CG14780	NA
FBgn0025388	0.0399618	0.0988879	protein_coding	CG12179	2
FBgn0025390	0.262573	0.408627	protein_coding	Mur2B	NA
FBgn0025391	0.552602	0.684708	protein_coding	Scgdelta	NA
FBgn0025394	0.461491	0.607929	protein_coding	inc	NA
FBgn0025454	0.566008	0.696619	protein_coding	Cyp6g1	NA
FBgn0025455	0.0724927	0.156099	protein_coding	CycT	NA
FBgn0025456	0.000891964	0.00419862	protein_coding	CREG	1
FBgn0025457	0.495144	0.636497	protein_coding	Bub3	NA
FBgn0025463	0.0410264	0.100881	protein_coding	Bap60	NA
FBgn0025469	0.264445	0.410241	protein_coding	slv	NA
FBgn0025519	0.764513	0.842055	protein_coding	fidipidine	NA
FBgn0025525	8.3577e-06	6.85874e-05	protein_coding	bab2	6
FBgn0025549	0.0792053	0.167239	protein_coding	unc-119	NA
FBgn0025558	0.589234	0.714985	protein_coding	CG4101	NA
FBgn0025571	0.0063604	0.0219268	protein_coding	SF1	5
FBgn0025574	0.412989	0.561985	protein_coding	Pli	NA
FBgn0025582	1.04616e-08	1.67464e-07	protein_coding	eIF3e	5
FBgn0025592	0.0881263	0.18165	protein_coding	Gk1	NA
FBgn0025595	0.0126226	0.0387644	protein_coding	AkhR	5
FBgn0025608	0.893923	0.92865	protein_coding	Faf2	NA
FBgn0025615	0.0670178	0.146885	protein_coding	Torsin	NA
FBgn0025620	7.70627e-14	3.58054e-12	protein_coding	CG13360	6
FBgn0025621	2.7825e-11	7.57603e-10	protein_coding	CG16989	5
FBgn0025624	0.149175	0.270619	protein_coding	CG4025	NA
FBgn0025625	0.847751	0.898144	protein_coding	Sik2	NA
FBgn0025626	0.0646435	0.14272	protein_coding	CG4281	NA
FBgn0025627	0.621492	0.741361	protein_coding	CG4194	NA
FBgn0025628	0.00960766	0.0309506	protein_coding	CG4199	5
FBgn0025629	0.00625004	0.0215862	protein_coding	CG4045	6
FBgn0025630	0.762299	0.840508	protein_coding	Rtca	NA
FBgn0025631	0.737679	0.824756	protein_coding	moody	NA
FBgn0025632	0.709902	0.80517	protein_coding	CG4313	NA
FBgn0025633	8.4585e-06	6.93538e-05	protein_coding	CG13366	1
FBgn0025634	0.00985104	0.031593	protein_coding	CG13367	6
FBgn0025635	0.615352	0.736577	protein_coding	CG17829	NA
FBgn0025637	6.66045e-09	1.12076e-07	protein_coding	SkpA	1
FBgn0025638	6.25186e-05	0.00041438	protein_coding	Roc1a	1
FBgn0025639	0.368446	0.520563	protein_coding	Hmt4-20	NA
FBgn0025640	0.559323	0.690211	protein_coding	CG13369	NA
FBgn0025641	0.0567842	0.129154	protein_coding	DAAM	NA
FBgn0025642	2.99733e-20	4.24123e-18	protein_coding	CG32812	3
FBgn0025643	0.0143969	0.0432463	protein_coding	CG3588	3
FBgn0025674	0.52315	0.660497	protein_coding	CycK	NA
FBgn0025676	0.454651	0.600957	protein_coding	CkIIalpha-i3	NA
FBgn0025678	1.26163e-19	1.59221e-17	protein_coding	CaBP1	4
FBgn0025680	0.00123067	0.0054782	protein_coding	cry	4
FBgn0025681	0.000211052	0.00122575	protein_coding	CG3558	1
FBgn0025682	0.0185286	0.0529331	protein_coding	scf	2
FBgn0025683	0.000582754	0.00291814	protein_coding	CG3164	3
FBgn0025684	0.0040809	0.0150519	protein_coding	MFS18	3
FBgn0025686	0.000104868	0.000658179	protein_coding	Amnionless	3
FBgn0025692	7.87803e-09	1.29987e-07	protein_coding	Lfg	1
FBgn0025693	0.00435683	0.0158894	protein_coding	ZnT41F	6
FBgn0025697	1.63804e-15	9.80616e-14	protein_coding	santa-maria	6
FBgn0025700	0.566735	0.697055	protein_coding	CG5885	NA
FBgn0025702	0.723559	0.81492	protein_coding	Srpk79D	NA
FBgn0025709	0.792008	0.861167	protein_coding	CNT2	NA
FBgn0025712	0.50316	0.642995	protein_coding	CG13920	NA
FBgn0025716	0.183709	0.316076	protein_coding	Bap55	NA
FBgn0025720	0.443847	0.59131	protein_coding	Ate1	NA
FBgn0025724	0.000406645	0.00214073	protein_coding	beta'COP	1
FBgn0025725	0.00368239	0.013789	protein_coding	alphaCOP	2
FBgn0025726	6.46284e-19	6.78163e-17	protein_coding	unc-13	6
FBgn0025739	0.715711	0.809204	protein_coding	pon	NA
FBgn0025740	0.026238	0.0701084	protein_coding	PlexB	7
FBgn0025741	0.000405511	0.00213717	protein_coding	PlexA	1
FBgn0025742	0.000316399	0.00173371	protein_coding	mtm	1
FBgn0025743	0.89047	0.926829	protein_coding	mbt	NA
FBgn0025777	0.0090851	0.0295013	protein_coding	homer	4
FBgn0025781	0.618224	0.738689	protein_coding	Cdc16	NA
FBgn0025790	0.996236	0.998481	protein_coding	TBPH	NA
FBgn0025800	1.67489e-05	0.000129164	protein_coding	Smox	5
FBgn0025802	0.817836	0.878308	protein_coding	Sbf	NA
FBgn0025807	0.543273	0.677458	protein_coding	Rad9	NA
FBgn0025808	0.583997	0.71089	protein_coding	Rad17	NA
FBgn0025809	0.0268726	0.0714383	protein_coding	Paf-AHalpha	4
FBgn0025814	0.0235225	0.064478	protein_coding	Mgstl	4
FBgn0025815	3.86686e-05	0.000272342	protein_coding	Mcm6	1
FBgn0025820	0.00133535	0.00587138	protein_coding	JTBR	4
FBgn0025825	0.743918	0.829094	protein_coding	HDAC3	NA
FBgn0025830	0.363816	0.515581	protein_coding	IntS8	NA
FBgn0025832	0.220963	0.361714	protein_coding	Fen1	NA
FBgn0025835	0.0175047	0.0506118	protein_coding	CG17707	4
FBgn0025836	0.0690388	0.150187	protein_coding	RhoGAP1A	NA
FBgn0025837	0.785688	0.856589	protein_coding	CG17636	NA
FBgn0025839	0.0569594	0.129427	protein_coding	ND-B14.5A	NA
FBgn0025864	0.0100121	0.0320217	protein_coding	Crag	7
FBgn0025865	5.03642e-08	6.99928e-07	protein_coding	Cortactin	1
FBgn0025866	0.00486128	0.0174546	protein_coding	CalpB	7
FBgn0025874	0.636963	0.753369	protein_coding	Meics	NA
FBgn0025879	0.262788	0.408757	protein_coding	Timp	NA
FBgn0025885	1.55382e-15	9.42278e-14	protein_coding	Inos	4
FBgn0025936	0.109951	0.214324	protein_coding	Eph	NA
FBgn0026015	0.658674	0.769496	protein_coding	Top3beta	NA
FBgn0026056	0.568618	0.698451	protein_coding	Rlip	NA
FBgn0026059	0.471524	0.617005	protein_coding	Mhcl	NA
FBgn0026060	0.993437	0.996424	protein_coding	Mipp2	NA
FBgn0026061	1.7399e-24	4.39161e-22	protein_coding	Mipp1	6
FBgn0026076	0.00980916	0.0314911	protein_coding	UBL3	1
FBgn0026077	8.13814e-06	6.69622e-05	protein_coding	Gasp	6
FBgn0026079	0.19486	0.330273	protein_coding	Nsun2	NA
FBgn0026080	0.389909	0.540743	protein_coding	Tip60	NA
FBgn0026083	0.464119	0.610652	protein_coding	tyf	NA
FBgn0026084	0.0014087	0.00612755	protein_coding	cib	1
FBgn0026085	0.5952	0.719836	protein_coding	dgt4	NA
FBgn0026086	0.390722	0.541388	protein_coding	Adar	NA
FBgn0026088	0.00823562	0.0271871	protein_coding	CG14818	3
FBgn0026089	0.806105	0.870319	protein_coding	CG14817	NA
FBgn0026090	0.0394682	0.0979001	protein_coding	CG14812	4
FBgn0026143	0.596889	0.721691	protein_coding	Cdc45	NA
FBgn0026144	0.437285	0.585381	protein_coding	CBP	NA
FBgn0026147	8.29318e-05	0.000534507	protein_coding	TTLL4A	6
FBgn0026148	0.535864	0.670925	protein_coding	CG12253	NA
FBgn0026149	0.679842	0.784413	protein_coding	BCL7-like	NA
FBgn0026150	0.0413007	0.101369	protein_coding	ApepP	NA
FBgn0026160	1.62031e-08	2.47257e-07	protein_coding	tna	5
FBgn0026179	0.0259483	0.0695354	protein_coding	siz	7
FBgn0026181	1.39064e-17	1.2252e-15	protein_coding	Rok	1
FBgn0026189	0.318398	0.468936	protein_coding	promL	NA
FBgn0026192	0.2197	0.360466	protein_coding	par-6	NA
FBgn0026196	0.000199585	0.00117154	protein_coding	nop5	5
FBgn0026199	0.760175	0.839456	protein_coding	myo	NA
FBgn0026206	0.849257	0.899026	protein_coding	mei-P26	NA
FBgn0026207	0.335833	0.487388	protein_coding	mbo	NA
FBgn0026238	0.525812	0.662534	protein_coding	gus	NA
FBgn0026239	0.0128507	0.0394002	protein_coding	gukh	6
FBgn0026250	0.00261063	0.0103264	protein_coding	eIF1A	5
FBgn0026252	4.16097e-07	4.74472e-06	protein_coding	msk	5
FBgn0026257	0.897142	0.930736	protein_coding	cav	NA
FBgn0026259	0.119595	0.228497	protein_coding	eIF5B	NA
FBgn0026261	0.800486	0.867155	protein_coding	bonsai	NA
FBgn0026262	0.853325	0.901085	protein_coding	bip2	NA
FBgn0026263	0.00609311	0.0211067	protein_coding	bip1	7
FBgn0026309	0.316631	0.467587	protein_coding	aft	NA
FBgn0026313	0.161331	0.287334	protein_coding	X11L	NA
FBgn0026314	0.568407	0.698451	protein_coding	Ugt35B1	NA
FBgn0026315	2.60743e-06	2.41815e-05	protein_coding	Ugt35A1	5
FBgn0026316	0.00464102	0.0167929	protein_coding	Ubc10	1
FBgn0026317	0.381535	0.532928	protein_coding	Tsc1	NA
FBgn0026319	0.00662993	0.0227337	protein_coding	Traf4	4
FBgn0026323	0.00739237	0.0248246	protein_coding	Tak1	7
FBgn0026324	0.0160011	0.0470807	protein_coding	Taf10b	4
FBgn0026326	0.588279	0.714444	protein_coding	Mad1	NA
FBgn0026361	0.193338	0.328407	protein_coding	Sep5	NA
FBgn0026369	3.26909e-05	0.000235027	protein_coding	Sara	1
FBgn0026370	0.231042	0.373473	NA	NA	NA
FBgn0026371	0.00493058	0.0176627	protein_coding	SAK	1
FBgn0026372	3.56639e-08	5.10055e-07	protein_coding	RpL23A	5
FBgn0026373	0.972494	0.98334	protein_coding	RpII33	NA
FBgn0026374	0.0102515	0.0327069	protein_coding	Rhp	7
FBgn0026375	0.00259787	0.0102847	protein_coding	RhoGAPp190	1
FBgn0026376	0.879251	0.919625	protein_coding	Rgl	NA
FBgn0026378	0.000230775	0.00132059	protein_coding	Rep	1
FBgn0026379	0.684892	0.788487	protein_coding	Pten	NA
FBgn0026380	0.0153441	0.0454051	protein_coding	Prosbeta3	1
FBgn0026393	0.452107	0.598728	protein_coding	Or43b	NA
FBgn0026400	0.68369	0.787591	protein_coding	Noa36	NA
FBgn0026401	0.896663	0.930736	protein_coding	Nipped-B	NA
FBgn0026402	0.959475	0.974183	protein_coding	NiPp1	NA
FBgn0026403	0.00189578	0.00793576	protein_coding	Ndg	2
FBgn0026404	0.000675547	0.0032962	protein_coding	Dronc	7
FBgn0026409	5.61095e-06	4.8074e-05	protein_coding	Mpcp2	5
FBgn0026415	0.0380144	0.0948735	protein_coding	Idgf4	2
FBgn0026417	0.385424	0.536515	protein_coding	Hus1-like	NA
FBgn0026418	0.779931	0.852402	protein_coding	Hsc70Cb	NA
FBgn0026427	0.134708	0.250606	protein_coding	Su(var)2-HP2	NA
FBgn0026428	0.792308	0.861393	protein_coding	HDAC6	NA
FBgn0026430	0.837338	0.890887	protein_coding	Grip84	NA
FBgn0026431	1.32095e-06	1.32081e-05	protein_coding	Grip75	3
FBgn0026432	0.401287	0.551429	protein_coding	Grip163	NA
FBgn0026433	0.0430985	0.104705	protein_coding	Grip128	NA
FBgn0026439	1.43369e-08	2.21309e-07	protein_coding	Eaat1	6
FBgn0026441	0.261196	0.40744	protein_coding	ear	NA
FBgn0026479	3.84174e-07	4.42675e-06	protein_coding	Drp1	1
FBgn0026533	0.000150594	0.000909703	protein_coding	Dek	5
FBgn0026562	0.126139	0.238422	protein_coding	SPARC	NA
FBgn0026563	0.779159	0.851858	protein_coding	CG1979	NA
FBgn0026565	3.9183e-22	7.62355e-20	protein_coding	Ass	6
FBgn0026566	0.606652	0.729717	protein_coding	CG1307	NA
FBgn0026570	0.00991268	0.0317471	protein_coding	CG5704	3
FBgn0026573	0.00191536	0.00799981	protein_coding	ADD1	5
FBgn0026575	0.0170625	0.0495635	protein_coding	hang	7
FBgn0026576	0.00816444	0.0269808	protein_coding	Pisd	5
FBgn0026577	0.00075914	0.00364692	protein_coding	CG8677	7
FBgn0026582	0.0382729	0.0953656	protein_coding	Hmg-2	1
FBgn0026592	0.40791	0.557572	protein_coding	Fie	NA
FBgn0026593	0.00767937	0.0256685	protein_coding	CG5707	3
FBgn0026597	0.103118	0.204419	protein_coding	Axn	NA
FBgn0026598	0.321074	0.472151	protein_coding	Apc2	NA
FBgn0026602	0.626806	0.745889	protein_coding	Ady43A	NA
FBgn0026616	0.349094	0.500272	protein_coding	alpha-Man-IIb	NA
FBgn0026619	0.0897602	0.184154	protein_coding	Taz	NA
FBgn0026620	5.27516e-07	5.87183e-06	protein_coding	tacc	1
FBgn0026630	0.425302	0.574057	protein_coding	nes	NA
FBgn0026634	0.0559857	0.127774	protein_coding	Cog2	NA
FBgn0026666	0.453852	0.600272	protein_coding	MagR	NA
FBgn0026679	0.856069	0.903064	protein_coding	IntS4	NA
FBgn0026702	0.578853	0.706747	protein_coding	Pop1	NA
FBgn0026713	0.00422612	0.0155079	protein_coding	l(1)G0007	1
FBgn0026718	0.0336958	0.0859326	protein_coding	Agpat2	4
FBgn0026721	0.197187	0.332887	protein_coding	fat-spondin	NA
FBgn0026722	0.118247	0.22685	protein_coding	drosha	NA
FBgn0026737	0.431327	0.579676	protein_coding	CG6171	NA
FBgn0026738	0.0609561	0.13645	protein_coding	CG7857	NA
FBgn0026741	0.937499	0.958435	protein_coding	mRpL18	NA
FBgn0026749	0.914915	0.942569	protein_coding	Yippee	NA
FBgn0026751	0.388194	0.539005	protein_coding	XRCC1	NA
FBgn0026755	2.16017e-23	4.69159e-21	protein_coding	Ugt37B1	6
FBgn0026756	0.241286	0.38506	protein_coding	Ugt37A1	NA
FBgn0026760	0.273668	0.420567	protein_coding	Tehao	NA
FBgn0026761	0.000444875	0.00232365	protein_coding	Trap1	5
FBgn0026777	5.49401e-05	0.000371263	protein_coding	Rad23	1
FBgn0026778	0.376341	0.528633	protein_coding	Rad1	NA
FBgn0026787	0.0413803	0.10151	protein_coding	Nhe1	NA
FBgn0026869	0.215561	0.355425	protein_coding	Thd1	NA
FBgn0026872	0.177714	0.308497	protein_coding	CG14777	NA
FBgn0026873	0.746891	0.831273	protein_coding	MED18	NA
FBgn0026876	0.615671	0.73677	protein_coding	CG11403	NA
FBgn0026878	0.258029	0.4036	protein_coding	CG4325	NA
FBgn0026879	0.773627	0.847894	protein_coding	CG13364	NA
FBgn0027052	0.572018	0.701152	protein_coding	STUB1	NA
FBgn0027053	0.827288	0.88429	protein_coding	CSN5	NA
FBgn0027054	0.297108	0.447228	protein_coding	CSN4	NA
FBgn0027055	0.309114	0.460123	protein_coding	CSN3	NA
FBgn0027057	0.107697	0.21119	protein_coding	CSN1b	NA
FBgn0027066	6.32097e-12	2.04376e-10	protein_coding	Eb1	1
FBgn0027070	0.0411803	0.101126	protein_coding	Ugt36E1	NA
FBgn0027073	0.109858	0.214188	protein_coding	Ugt49B1	NA
FBgn0027079	0.209404	0.347975	protein_coding	ValRS	NA
FBgn0027080	0.0103686	0.0329924	protein_coding	TyrRS	5
FBgn0027081	0.00885265	0.0288569	protein_coding	ThrRS	1
FBgn0027082	0.985915	0.991458	protein_coding	ProRS-m	NA
FBgn0027083	0.0755562	0.161284	protein_coding	MetRS-m	NA
FBgn0027084	0.0943082	0.191134	protein_coding	LysRS	NA
FBgn0027085	0.00783241	0.0260866	protein_coding	LeuRS-m	7
FBgn0027086	1.76203e-07	2.17093e-06	protein_coding	IleRS	5
FBgn0027087	0.239728	0.383229	protein_coding	HisRS	NA
FBgn0027088	0.197474	0.33313	protein_coding	GlyRS	NA
FBgn0027090	0.41979	0.569001	protein_coding	GlnRS	NA
FBgn0027091	0.00574337	0.0201115	protein_coding	CysRS	3
FBgn0027093	0.138845	0.256121	protein_coding	ArgRS	NA
FBgn0027094	0.456348	0.602721	protein_coding	AlaRS	NA
FBgn0027095	1.14997e-07	1.4732e-06	protein_coding	Manf	1
FBgn0027101	0.000662581	0.00324613	protein_coding	Dyrk3	4
FBgn0027106	0.65334	0.765371	protein_coding	Inx7	NA
FBgn0027108	5.4285e-11	1.42407e-09	protein_coding	Inx2	6
FBgn0027109	0.00190712	0.00797967	protein_coding	NPF	3
FBgn0027259	0.0441696	0.106589	protein_coding	Kmn1	NA
FBgn0027279	0.236469	0.379317	protein_coding	l(1)G0196	NA
FBgn0027280	0.463861	0.610484	protein_coding	l(1)G0193	NA
FBgn0027287	0.292672	0.442044	protein_coding	Gmap	NA
FBgn0027291	0.00326483	0.0125011	protein_coding	Idh3a	5
FBgn0027296	0.00568204	0.0199566	protein_coding	temp	6
FBgn0027329	0.122936	0.233304	protein_coding	CCT6	NA
FBgn0027330	0.0527365	0.122089	protein_coding	l(1)G0020	NA
FBgn0027334	1.21589e-08	1.91811e-07	protein_coding	l(1)G0004	5
FBgn0027335	4.32195e-07	4.90109e-06	protein_coding	Rip11	7
FBgn0027338	5.29853e-07	5.89083e-06	protein_coding	Kap-alpha3	5
FBgn0027339	0.000155331	0.000935291	protein_coding	jim	5
FBgn0027341	0.239675	0.383209	NA	NA	NA
FBgn0027342	0.705652	0.80271	protein_coding	fz4	NA
FBgn0027343	7.07886e-08	9.52586e-07	protein_coding	fz3	6
FBgn0027348	0.00103537	0.0047562	protein_coding	bgm	6
FBgn0027356	0.467631	0.613458	protein_coding	Amph	NA
FBgn0027358	0.996766	0.998798	protein_coding	Tim9b	NA
FBgn0027359	0.707844	0.804204	protein_coding	Tim8	NA
FBgn0027360	0.105306	0.207667	protein_coding	Tim10	NA
FBgn0027363	1.14209e-10	2.74897e-09	protein_coding	Stam	7
FBgn0027375	0.00016376	0.000981614	protein_coding	RecQ5	5
FBgn0027378	0.197008	0.332705	protein_coding	MRG15	NA
FBgn0027453	0.550916	0.683449	protein_coding	Dnz1	NA
FBgn0027490	0.636885	0.753369	protein_coding	D12	NA
FBgn0027492	0.00328316	0.0125353	protein_coding	wdb	1
FBgn0027493	0.000113319	0.000705527	protein_coding	AdSS	5
FBgn0027495	0.46588	0.612021	protein_coding	Smyd4-4	NA
FBgn0027496	0.000200809	0.00117725	protein_coding	epsilonCOP	4
FBgn0027497	0.263915	0.409556	protein_coding	Madm	NA
FBgn0027498	0.000752994	0.00362485	protein_coding	CG2061	6
FBgn0027499	0.00122131	0.00544689	protein_coding	wde	2
FBgn0027500	0.294267	0.443896	protein_coding	spd-2	NA
FBgn0027503	0.0722683	0.155725	protein_coding	CG11970	NA
FBgn0027504	0.174918	0.304997	protein_coding	CG8878	NA
FBgn0027505	0.0122931	0.0379271	protein_coding	Rab3-GAP	1
FBgn0027506	0.0550669	0.126387	protein_coding	EDTP	NA
FBgn0027507	0.951216	0.96843	protein_coding	CG1344	NA
FBgn0027508	0.266996	0.412983	protein_coding	Tnks	NA
FBgn0027509	0.0013192	0.00580858	protein_coding	TBCD	1
FBgn0027512	0.0703406	0.152522	protein_coding	CG10254	NA
FBgn0027513	0.0503165	0.117603	protein_coding	ana2	NA
FBgn0027514	0.929393	0.952299	protein_coding	CG1024	NA
FBgn0027515	0.945986	0.964682	protein_coding	CG7115	NA
FBgn0027518	0.214814	0.354631	protein_coding	Wdr24	NA
FBgn0027521	0.247293	0.391834	protein_coding	CG3679	NA
FBgn0027524	0.0191686	0.0544053	protein_coding	CG3909	4
FBgn0027525	3.76663e-09	6.7003e-08	protein_coding	LTV1	5
FBgn0027526	0.477356	0.621848	protein_coding	Ublcp1	NA
FBgn0027528	0.234969	0.377796	protein_coding	goe	NA
FBgn0027529	0.926028	0.950453	protein_coding	tapas	NA
FBgn0027532	0.000187574	0.00110831	protein_coding	CG7139	5
FBgn0027535	0.167027	0.293982	protein_coding	botv	NA
FBgn0027537	0.141095	0.259081	protein_coding	Nup93-1	NA
FBgn0027538	1.51324e-23	3.44687e-21	protein_coding	beta4GalNAcTA	1
FBgn0027539	0.00288709	0.0112579	protein_coding	lili	6
FBgn0027547	0.00183314	0.00770463	protein_coding	CG1927	6
FBgn0027548	0.525827	0.662534	protein_coding	nito	NA
FBgn0027549	0.193534	0.328621	protein_coding	Nulp1	NA
FBgn0027550	0.697777	0.797209	protein_coding	CG6495	NA
FBgn0027552	0.98825	0.993463	protein_coding	CG10863	NA
FBgn0027553	0.288223	0.437098	protein_coding	NELF-B	NA
FBgn0027554	3.90259e-09	6.9027e-08	protein_coding	CG8042	4
FBgn0027556	0.349105	0.500272	protein_coding	CG4928	NA
FBgn0027558	1.25239e-06	1.26171e-05	protein_coding	Pgant3	1
FBgn0027560	0.402059	0.552244	protein_coding	Tps1	NA
FBgn0027561	4.59151e-07	5.18502e-06	protein_coding	CG18659	7
FBgn0027562	0.545277	0.678889	protein_coding	CG10345	NA
FBgn0027563	0.702822	0.800584	protein_coding	CG9631	NA
FBgn0027564	0.0379207	0.0947083	protein_coding	CG3149	1
FBgn0027565	0.105483	0.207917	protein_coding	CG5498	NA
FBgn0027567	0.00217037	0.00886661	protein_coding	CG8108	2
FBgn0027568	0.70567	0.80271	protein_coding	Cand1	NA
FBgn0027569	9.87293e-09	1.58971e-07	protein_coding	cert	1
FBgn0027570	4.2668e-06	3.76632e-05	protein_coding	Nep2	7
FBgn0027572	0.40516	0.555054	protein_coding	CG5009	NA
FBgn0027574	0.756109	0.837045	protein_coding	CG5815	NA
FBgn0027575	0.00231913	0.00937996	protein_coding	GABA-B-R2	5
FBgn0027578	0.0489694	0.115341	protein_coding	Nepl21	NA
FBgn0027579	0.0181622	0.0521924	protein_coding	mino	3
FBgn0027580	0.87845	0.919198	protein_coding	PCB	NA
FBgn0027581	0.000209138	0.00121689	protein_coding	CG6191	7
FBgn0027582	0.0440349	0.106347	protein_coding	CG6230	NA
FBgn0027583	0.0477448	0.113141	protein_coding	CG7601	NA
FBgn0027585	0.261243	0.40744	protein_coding	CG8740	NA
FBgn0027586	0.000102248	0.000645198	protein_coding	CG5867	3
FBgn0027587	0.514811	0.652971	protein_coding	CG7028	NA
FBgn0027588	0.0449799	0.108295	protein_coding	GCS2alpha	NA
FBgn0027590	0.879688	0.919772	protein_coding	GstE12	NA
FBgn0027592	0.356707	0.50805	protein_coding	MED15	NA
FBgn0027594	1.6362e-06	1.60341e-05	protein_coding	drpr	7
FBgn0027596	0.024309	0.0661484	protein_coding	Kank	5
FBgn0027597	0.122024	0.232142	protein_coding	CG17712	NA
FBgn0027598	1.52894e-06	1.50779e-05	protein_coding	cindr	7
FBgn0027599	0.00107558	0.00491432	protein_coding	CG2790	6
FBgn0027601	3.7502e-17	3.12706e-15	protein_coding	pdgy	1
FBgn0027602	0.0172343	0.0499539	protein_coding	CG8611	6
FBgn0027603	0.795709	0.863583	protein_coding	Ulp1	NA
FBgn0027607	0.0058477	0.0203927	protein_coding	CG8230	2
[truncated: 7,341 more rows]

## Sheet: OKSM vs. Control
gene_id	log2FoldChange	pvalue	padj	gene_biotype	external_gene_name
FBgn0000003	0.0467238	0.885458	0.937394	ncRNA	7SLRNA:CR32864
FBgn0000008	1.08417	3.33463e-07	7.11007e-06	protein_coding	a
FBgn0000014	-0.131962	0.662515	0.790302	protein_coding	abd-A
FBgn0000015	-0.381536	0.306032	0.485481	protein_coding	Abd-B
FBgn0000017	-0.236925	0.0682813	0.167414	protein_coding	Abl
FBgn0000018	-0.100301	0.474964	0.643227	protein_coding	abo
FBgn0000024	-0.373091	0.0513825	0.136213	protein_coding	Ace
FBgn0000032	0.220224	0.0309173	0.0931708	protein_coding	Acph-1
FBgn0000042	0.501679	0.00274596	0.0143346	protein_coding	Act5C
FBgn0000043	1.4144	4.1443e-08	1.16227e-06	protein_coding	Act42A
FBgn0000044	1.17616	2.32302e-07	5.21625e-06	protein_coding	Act57B
FBgn0000045	-0.221731	0.508868	0.671801	protein_coding	Act79B
FBgn0000046	1.1342	5.45789e-06	7.96237e-05	protein_coding	Act87E
FBgn0000052	-0.0563998	0.723849	0.832787	protein_coding	Pfas
FBgn0000053	0.638217	0.0006782	0.00470209	protein_coding	Gart
FBgn0000055	0.316643	0.222454	0.391876	protein_coding	Adh
FBgn0000056	0.183867	0.589633	0.735814	protein_coding	Adhr
FBgn0000057	0.124764	0.372006	0.550581	protein_coding	adp
FBgn0000063	0.23472	0.526135	0.686253	protein_coding	Mps1
FBgn0000064	-0.17453	0.000852748	0.00563211	protein_coding	Ald1
FBgn0000075	-0.868522	0.00752267	0.0315551	protein_coding	amd
FBgn0000077	0.133435	0.433063	0.606535	protein_coding	amx
FBgn0000078	0.773723	0.0064352	0.0279657	protein_coding	Amy-d
FBgn0000079	0.533999	0.0444482	0.121339	protein_coding	Amy-p
FBgn0000083	0.595251	0.000366371	0.00283006	protein_coding	AnxB9
FBgn0000084	1.12086	1.63208e-15	2.87586e-13	protein_coding	AnxB10
FBgn0000097	0.338025	0.000462475	0.00344147	protein_coding	aop
FBgn0000100	-0.745448	1.87947e-08	5.68037e-07	protein_coding	RpLP0
FBgn0000108	-0.439394	0.0468906	0.126674	protein_coding	Appl
FBgn0000109	0.585139	7.53965e-06	0.000105408	protein_coding	Aprt
FBgn0000114	-0.619148	0.103599	0.227682	protein_coding	bru1
FBgn0000115	0.0557668	0.597793	0.742393	protein_coding	Arl1
FBgn0000116	-0.112345	0.436184	0.609444	protein_coding	Argk
FBgn0000117	0.0855454	0.210324	0.376143	protein_coding	arm
FBgn0000119	-0.312177	0.00733901	0.0311117	protein_coding	arr
FBgn0000120	-2.93245	1.90946e-12	1.77701e-10	protein_coding	Arr1
FBgn0000121	-1.09585	0.00641222	0.0279048	protein_coding	Arr2
FBgn0000139	-0.339624	0.00156708	0.00914687	protein_coding	ash2
FBgn0000140	0.113463	0.731864	0.837813	protein_coding	asp
FBgn0000146	0.0831416	0.824572	0.899192	protein_coding	aub
FBgn0000147	0.612859	0.0976526	0.217604	protein_coding	aurA
FBgn0000150	-0.0163075	0.854488	0.919175	protein_coding	awd
FBgn0000152	-0.219252	0.297389	0.476056	protein_coding	Axs
FBgn0000153	-1.40319	0.000339016	0.00267179	protein_coding	b
FBgn0000163	0.346107	0.00933675	0.0374875	protein_coding	baz
FBgn0000173	0.173945	0.0826963	0.193656	protein_coding	ben
FBgn0000180	0.346175	0.175976	0.332479	protein_coding	bib
FBgn0000181	-0.326665	1.88895e-05	0.000233964	protein_coding	bic
FBgn0000182	-0.191628	0.626226	0.766064	protein_coding	BicC
FBgn0000183	0.225357	0.000542933	0.0039245	protein_coding	BicD
FBgn0000212	-0.243379	0.0323954	0.0964229	protein_coding	brm
FBgn0000221	-0.00483879	0.981755	0.991889	protein_coding	brn
FBgn0000228	-0.216582	0.0424366	0.117392	protein_coding	Bsg25D
FBgn0000229	0.247724	0.0203012	0.0685192	protein_coding	bsk
FBgn0000239	-0.021768	0.805888	0.886999	protein_coding	bur
FBgn0000241	1.55444	1.63437e-11	1.11412e-09	protein_coding	bw
FBgn0000244	-0.146013	0.390974	0.567326	protein_coding	by
FBgn0000246	-0.177773	0.440441	0.612733	protein_coding	c(3)G
FBgn0000247	-0.128968	0.10796	0.235184	protein_coding	ca
FBgn0000250	0.0283021	0.799952	0.882442	protein_coding	cact
FBgn0000251	0.0671487	0.750636	0.850828	protein_coding	cad
FBgn0000253	0.197262	0.0567214	0.146428	protein_coding	Cam
FBgn0000256	-0.490112	0.00718525	0.0305709	protein_coding	capu
FBgn0000257	0.172997	0.10413	0.228764	protein_coding	car
FBgn0000259	-0.0541388	0.581675	0.729901	protein_coding	CkIIbeta
FBgn0000261	0.171153	0.25909	0.433933	protein_coding	Cat
FBgn0000273	0.0141844	0.849036	0.916029	protein_coding	Pka-C1
FBgn0000276	1.06537	0.00293011	0.0150353	protein_coding	CecA1
FBgn0000283	-0.426606	2.97076e-07	6.48223e-06	protein_coding	Cp190
FBgn0000286	-0.216552	0.0390819	0.110702	protein_coding	Cf2
FBgn0000289	-0.265268	0.000349914	0.00273003	protein_coding	cg
FBgn0000299	-0.110813	0.668447	0.794285	protein_coding	Col4a1
FBgn0000307	-0.0154157	0.883601	0.936953	protein_coding	chif
FBgn0000308	0.538996	6.00111e-08	1.61511e-06	protein_coding	chic
FBgn0000316	0.0918242	0.413464	0.588081	protein_coding	cin
FBgn0000317	-0.120736	0.313923	0.493722	protein_coding	ck
FBgn0000318	0.293336	0.0113925	0.0436402	protein_coding	cl
FBgn0000319	0.179443	0.0527858	0.138677	protein_coding	Chc
FBgn0000326	0.35904	0.00401779	0.0192817	protein_coding	clt
FBgn0000330	0.278917	0.0275217	0.086337	protein_coding	cm
FBgn0000339	0.406623	8.57443e-06	0.00011776	protein_coding	cni
FBgn0000346	-0.0191429	0.953862	0.975804	protein_coding	comt
FBgn0000352	-0.176165	0.360243	0.539725	protein_coding	cos
FBgn0000355	0.629913	6.58275e-05	0.000688699	protein_coding	Cp15
FBgn0000357	0.337992	0.0567232	0.146428	protein_coding	Cp18
FBgn0000359	-0.243017	0.338021	0.51827	protein_coding	Cp36
FBgn0000360	-0.240439	0.339967	0.520142	protein_coding	Cp38
FBgn0000370	-0.384923	1.72855e-06	2.92974e-05	protein_coding	crc
FBgn0000376	-0.577511	0.00164055	0.00946913	protein_coding	crm
FBgn0000377	-0.022679	0.879984	0.934946	protein_coding	crn
FBgn0000382	-0.273114	0.034844	0.101913	protein_coding	csw
FBgn0000384	0.0860936	0.505423	0.668955	protein_coding	cta
FBgn0000392	0.046449	0.825063	0.899202	protein_coding	cup
FBgn0000394	0.16723	0.432227	0.606001	protein_coding	cv
FBgn0000395	0.608274	0.0323546	0.0963828	protein_coding	cv-2
FBgn0000404	0.658092	0.00977128	0.0388258	protein_coding	CycA
FBgn0000405	0.324093	0.35511	0.534726	protein_coding	CycB
FBgn0000406	-0.459023	0.187374	0.346925	protein_coding	Cyt-b5-r
FBgn0000412	-0.0434884	0.658319	0.787299	protein_coding	D1
FBgn0000414	0.0380094	0.899641	0.946099	protein_coding	Dab
FBgn0000416	0.0937083	0.284195	0.462547	protein_coding	Sap-r
FBgn0000422	-0.840259	0.000656926	0.00457201	protein_coding	Ddc
FBgn0000426	0.15495	0.310025	0.489703	protein_coding	SmF
FBgn0000442	0.49333	0.121218	0.256238	protein_coding	Pkg21D
FBgn0000447	-0.394579	0.000781935	0.00526875	protein_coding	Dhod
FBgn0000448	0.558079	0.0404941	0.113737	protein_coding	Hr3
FBgn0000449	-1.10399	0.000121233	0.00114133	protein_coding	dib
FBgn0000451	-0.256667	0.497272	0.662315	protein_coding	ect
FBgn0000454	0.291095	0.00442725	0.0207874	protein_coding	Dip-B
FBgn0000455	0.287217	0.00142309	0.0085139	protein_coding	Dip-C
FBgn0000459	0.491275	0.126738	0.264257	protein_coding	disco
FBgn0000463	0.355562	0.0592611	0.15116	protein_coding	Dl
FBgn0000464	-0.163591	0.189541	0.350104	protein_coding	Lar
FBgn0000473	-0.89349	2.32355e-07	5.21625e-06	protein_coding	Cyp6a2
FBgn0000477	0.362249	0.169742	0.323977	protein_coding	DNaseII
FBgn0000479	-0.673236	3.04927e-05	0.000355077	protein_coding	dnc
FBgn0000482	0.00872272	0.927722	0.961277	protein_coding	dor
FBgn0000489	-0.160445	0.622307	0.763295	protein_coding	Pka-C3
FBgn0000490	0.107154	0.615537	0.75698	protein_coding	dpp
FBgn0000499	-0.0491703	0.650276	0.782366	protein_coding	dsh
FBgn0000504	0.0418396	0.828901	0.901912	protein_coding	dsx
FBgn0000520	-0.265934	0.04204	0.116744	protein_coding	dwg
FBgn0000524	-0.032618	0.82427	0.898967	protein_coding	dx
FBgn0000533	-0.243383	0.526616	0.68632	protein_coding	ea
FBgn0000536	0.423232	5.04501e-05	0.000547853	protein_coding	eas
FBgn0000541	-0.351532	0.000483169	0.00355581	protein_coding	E(bx)
FBgn0000542	-0.821504	0.0137723	0.0507576	protein_coding	ec
FBgn0000543	0.0889891	0.542354	0.698873	protein_coding	ecd
FBgn0000546	-0.611259	0.000310234	0.00248055	protein_coding	EcR
FBgn0000547	-0.0518812	0.809508	0.889935	protein_coding	ed
FBgn0000557	-1.57709	1.9748e-05	0.000243306	protein_coding	eEF1alpha2
FBgn0000559	-0.682058	1.62354e-09	6.95515e-08	protein_coding	eEF2
FBgn0000562	0.0423476	0.587373	0.734241	protein_coding	egl
FBgn0000565	0.822807	0.000453602	0.00338804	protein_coding	MsrA
FBgn0000566	0.205084	0.0290169	0.0896424	protein_coding	Eip55E
FBgn0000567	0.00805169	0.947858	0.972451	protein_coding	Eip74EF
FBgn0000568	-0.277646	0.0921161	0.20845	protein_coding	Eip75B
FBgn0000575	0.01577	0.909139	0.951374	protein_coding	emc
FBgn0000578	0.43683	0.00653241	0.0282529	protein_coding	ena
FBgn0000579	-0.209015	0.0664982	0.164143	protein_coding	Eno
FBgn0000581	-0.489525	0.000134829	0.00124547	protein_coding	E(Pc)
FBgn0000588	0.173594	0.551563	0.705913	protein_coding	esc
FBgn0000592	-0.294435	0.0592726	0.15116	protein_coding	Est-6
FBgn0000611	-0.162903	0.030513	0.0922501	protein_coding	exd
FBgn0000615	0.260781	0.0777675	0.184896	protein_coding	exu
FBgn0000617	0.134645	0.423199	0.597469	protein_coding	e(y)1
FBgn0000618	0.613344	0.00169392	0.00974709	protein_coding	e(y)2
FBgn0000629	-0.364891	0.00259184	0.0137218	protein_coding	E(z)
FBgn0000633	0.52215	0.118784	0.252233	protein_coding	CG17716
FBgn0000635	0.296535	0.0133661	0.0495539	protein_coding	Fas2
FBgn0000636	0.198909	0.211275	0.377192	protein_coding	Fas3
FBgn0000644	0.53337	0.136253	0.277004	protein_coding	Fcp3C
FBgn0000659	-0.165954	0.389361	0.565944	protein_coding	fkh
FBgn0000662	-0.187992	0.0343935	0.100848	protein_coding	fl(2)d
FBgn0000667	0.413863	0.00897118	0.0363106	protein_coding	Actn
FBgn0000709	0.142643	0.265439	0.44117	protein_coding	fliI
FBgn0000711	0.309514	0.011994	0.0453674	protein_coding	flw
FBgn0000719	0.270002	0.0815303	0.19184	protein_coding	fog
FBgn0000721	-0.562579	3.45376e-06	5.34903e-05	protein_coding	for
FBgn0000723	-0.586291	1.17476e-05	0.00015474	protein_coding	FER
FBgn0000810	-0.136042	0.491504	0.657681	protein_coding	fs(1)K10
FBgn0000927	0.268614	0.434623	0.6079	protein_coding	fs(1)Ya
FBgn0000996	0.271735	0.110917	0.239449	protein_coding	dup
FBgn0001075	-0.645265	0.0578509	0.148671	protein_coding	ft
FBgn0001078	-0.452949	0.00105278	0.00670661	protein_coding	ftz-f1
FBgn0001079	-0.303112	0.194675	0.356986	protein_coding	fu
FBgn0001084	-0.290696	0.345289	0.525103	protein_coding	fy
FBgn0001085	-0.0219055	0.933497	0.963733	protein_coding	fz
FBgn0001086	0.544749	0.0653498	0.161979	protein_coding	fzy
FBgn0001087	-0.364506	0.000632867	0.00445056	protein_coding	g
FBgn0001089	-0.483647	0.0579822	0.148803	protein_coding	Gal
FBgn0001090	-0.202812	0.556637	0.710083	protein_coding	bnb
FBgn0001091	-0.150575	0.156632	0.305959	protein_coding	Gapdh1
FBgn0001092	0.113452	0.318862	0.498385	protein_coding	Gapdh2
FBgn0001098	-0.0975483	0.651972	0.783085	protein_coding	Gdh
FBgn0001099	-0.202402	0.471185	0.640057	protein_coding	gdl
FBgn0001104	0.413047	1.40494e-06	2.46161e-05	protein_coding	Galphai
FBgn0001105	0.286053	4.50866e-06	6.75864e-05	protein_coding	Gbeta13F
FBgn0001108	0.145011	0.0833158	0.194424	protein_coding	DCTN1-p150
FBgn0001112	0.0320792	0.901669	0.947102	protein_coding	Gld
FBgn0001114	-0.308458	0.356818	0.53652	protein_coding	Glt
FBgn0001122	0.398294	0.00400165	0.0192339	protein_coding	Galphao
FBgn0001123	0.155671	0.0360776	0.104669	protein_coding	Galphas
FBgn0001124	0.231755	0.0154996	0.0556307	protein_coding	Got1
FBgn0001125	0.105659	0.406974	0.582477	protein_coding	Got2
FBgn0001128	0.0415771	0.750871	0.850828	protein_coding	Gpdh1
FBgn0001133	-0.010084	0.931898	0.963147	protein_coding	grau
FBgn0001134	-0.532196	0.0399022	0.112344	protein_coding	Grd
FBgn0001137	0.276296	0.406068	0.581548	protein_coding	grk
FBgn0001139	-0.214247	0.00746966	0.0314656	protein_coding	gro
FBgn0001142	-0.286757	0.116662	0.248745	protein_coding	Gs1
FBgn0001145	-0.705755	0.000228722	0.00194185	protein_coding	Gs2
FBgn0001149	1.68105	2.08196e-48	3.88868e-45	protein_coding	GstD1
FBgn0001168	0.260972	0.094721	0.213157	protein_coding	h
FBgn0001169	-0.324487	0.00840043	0.0344539	protein_coding	H
FBgn0001170	0.132259	0.628388	0.767012	protein_coding	H2.0
FBgn0001179	0.229322	0.18033	0.338513	protein_coding	hay
FBgn0001180	0.460993	0.173488	0.3292	protein_coding	hb
FBgn0001185	-0.277177	0.0500658	0.133627	protein_coding	her
FBgn0001186	0.45695	0.00369043	0.018035	protein_coding	Hex-A
FBgn0001187	0.183607	0.496568	0.662035	protein_coding	Hex-C
FBgn0001189	0.0116105	0.919963	0.956687	protein_coding	hfw
FBgn0001197	0.192909	0.0923112	0.208739	protein_coding	His2Av
FBgn0001202	0.228002	0.00985553	0.0390003	protein_coding	hook
FBgn0001206	-0.412064	0.109536	0.237345	protein_coding	Hmr
FBgn0001208	-0.782318	0.0332218	0.098214	protein_coding	Hn
FBgn0001215	-0.167781	0.111103	0.239738	protein_coding	Hrb98DE
FBgn0001216	-0.868277	0.0227787	0.074767	protein_coding	Hsc70-1
FBgn0001217	1.46064	7.51537e-07	1.45313e-05	protein_coding	Hsc70-2
FBgn0001218	0.0628919	0.612096	0.75411	protein_coding	Hsc70-3
FBgn0001220	-0.00296978	0.970041	0.985606	protein_coding	Hsc70-5
FBgn0001222	-0.0950749	0.375398	0.553496	protein_coding	Hsf
FBgn0001223	2.09215	2.47395e-12	2.22156e-10	protein_coding	Hsp22
FBgn0001224	2.31846	4.52653e-13	5.15528e-11	protein_coding	Hsp23
FBgn0001225	1.95694	9.70174e-11	5.39313e-09	protein_coding	Hsp26
FBgn0001226	1.24263	8.20461e-05	0.00083015	protein_coding	Hsp27
FBgn0001228	0.767819	0.0106056	0.0412596	protein_coding	CG4456
FBgn0001230	2.01162	3.92274e-11	2.50921e-09	protein_coding	Hsp68
FBgn0001233	-0.0272661	0.927424	0.961075	protein_coding	Hsp83
FBgn0001234	0.261932	0.276193	0.453555	ncRNA	lncRNA:Hsromega
FBgn0001235	-0.456524	0.0297275	0.0909949	protein_coding	hth
FBgn0001247	-0.086005	0.362817	0.54218	protein_coding	Ide
FBgn0001248	-0.223501	0.137153	0.278349	protein_coding	Idh
FBgn0001250	0.0701739	0.778878	0.868738	protein_coding	if
FBgn0001255	0.116422	0.745388	0.847706	protein_coding	ImpE3
FBgn0001257	1.63741	9.97574e-09	3.2804e-07	protein_coding	ImpL2
FBgn0001258	0.164719	0.40205	0.577475	protein_coding	Ldh
FBgn0001259	0.240122	0.453998	0.624523	protein_coding	in
FBgn0001276	0.0135511	0.954973	0.97662	protein_coding	ix
FBgn0001280	-0.0193819	0.874017	0.93083	protein_coding	janA
FBgn0001285	0.0766308	0.759052	0.85634	protein_coding	Jon44E
FBgn0001291	0.109114	0.497166	0.662315	protein_coding	Jra
FBgn0001296	-0.493621	0.0227313	0.0746722	protein_coding	kar
FBgn0001297	0.0472883	0.844515	0.912733	protein_coding	kay
FBgn0001301	-0.0523003	0.704063	0.819549	protein_coding	kel
FBgn0001308	0.18058	0.0976251	0.217595	protein_coding	Khc
FBgn0001316	-0.33651	0.0224736	0.0741312	protein_coding	klar
FBgn0001320	-0.455479	0.0975782	0.217595	protein_coding	kni
FBgn0001321	-0.282636	0.453963	0.624523	protein_coding	knk
FBgn0001323	-0.301539	0.283741	0.46213	protein_coding	knrl
FBgn0001324	-0.152935	0.102378	0.225657	protein_coding	kto
FBgn0001330	-0.469372	0.020695	0.0696623	protein_coding	kz
FBgn0001341	-0.266639	0.0991228	0.219883	protein_coding	Mybbp1A
FBgn0001404	-0.265369	0.0069445	0.0297226	protein_coding	egh
FBgn0001491	0.303475	0.00913464	0.0368503	protein_coding	l(1)10Bb
FBgn0001565	-0.413909	0.00273334	0.0142998	protein_coding	Hlc
FBgn0001612	0.342398	0.0884201	0.202391	protein_coding	Grip91
FBgn0001624	-0.0504424	0.573952	0.723952	protein_coding	dlg1
FBgn0001941	0.383757	1.24539e-05	0.000162439	protein_coding	ifc
FBgn0001942	-0.720383	2.57666e-09	1.0228e-07	protein_coding	eIF4A
FBgn0001961	0.489528	4.70224e-06	6.95946e-05	protein_coding	Arpc1
FBgn0001965	0.00784361	0.943985	0.97064	protein_coding	Sos
FBgn0001970	0.504793	0.0151024	0.0545007	protein_coding	Pgant35A
FBgn0001977	0.362183	0.00302713	0.0154146	protein_coding	CIAPIN1
FBgn0001978	-0.146115	0.214045	0.3809	protein_coding	stc
FBgn0001981	0.213656	0.25408	0.428312	protein_coding	esg
FBgn0001986	-0.428307	0.00202709	0.0112417	protein_coding	Mtr4
FBgn0001987	0.411218	0.00106283	0.00676475	protein_coding	Gli
FBgn0001989	-0.101871	0.386387	0.563883	protein_coding	ND-B17
FBgn0001990	0.0108752	0.951741	0.974703	protein_coding	wek
FBgn0001991	0.255612	0.175848	0.332438	protein_coding	Ca-alpha1D
FBgn0001992	-0.0680286	0.73845	0.842693	protein_coding	Cyp303a1
FBgn0001994	-0.0839783	0.355367	0.534941	protein_coding	crp
FBgn0001995	-0.165488	0.132107	0.271392	protein_coding	mRpL4
FBgn0002021	-0.167307	0.126637	0.264257	protein_coding	l(2)37Bb
FBgn0002022	-0.352446	0.00200829	0.0111507	protein_coding	Catsup
FBgn0002023	-1.15783	8.5536e-06	0.000117647	protein_coding	Lim3
FBgn0002031	0.00505039	0.948857	0.97255	protein_coding	l(2)37Cc
FBgn0002036	0.119226	0.398064	0.573868	protein_coding	CG10561
FBgn0002044	-0.0696535	0.541792	0.69877	protein_coding	swm
FBgn0002069	-0.0373221	0.652481	0.783085	protein_coding	AspRS
FBgn0002121	0.123235	0.278248	0.456288	protein_coding	l(2)gl
FBgn0002174	-0.445469	3.11809e-06	4.9106e-05	protein_coding	CG5504
FBgn0002183	-0.222645	0.0254656	0.0814742	protein_coding	dre4
FBgn0002283	0.0956514	0.542245	0.698872	protein_coding	l(3)73Ah
FBgn0002284	0.290492	0.00238356	0.01283	protein_coding	Prosbeta6
FBgn0002306	-0.729583	0.0105204	0.0409886	protein_coding	sas
FBgn0002354	-0.000494836	0.997498	0.999103	protein_coding	l(3)87Df
FBgn0002413	-0.109127	0.129669	0.267974	protein_coding	dco
FBgn0002431	-0.11212	0.117687	0.250417	protein_coding	hyd
FBgn0002441	-0.161657	0.152036	0.299108	protein_coding	l(3)mbt
FBgn0002466	0.866649	0.00362143	0.0177815	protein_coding	sti
FBgn0002521	0.334207	0.00175357	0.0100162	protein_coding	pho
FBgn0002522	-0.531499	0.000416803	0.00316413	protein_coding	lab
FBgn0002524	-0.135803	0.432515	0.606188	protein_coding	lace
FBgn0002525	0.172245	0.236899	0.408343	protein_coding	Lam
FBgn0002526	0.704494	7.79918e-08	2.04597e-06	protein_coding	LanA
FBgn0002542	0.407051	0.0133515	0.0495277	protein_coding	lds
FBgn0002543	0.17305	0.244172	0.41665	protein_coding	robo2
FBgn0002552	-0.472301	0.00131732	0.00800187	protein_coding	lin
FBgn0002564	0.874006	0.00895865	0.0362814	protein_coding	Lsp1gamma
FBgn0002565	-0.158291	0.615794	0.757096	protein_coding	Lsp2
FBgn0002566	0.104718	0.286029	0.463594	protein_coding	lt
FBgn0002567	-0.433608	0.0355528	0.1035	protein_coding	Rab32
FBgn0002569	1.13635	5.73378e-11	3.52288e-09	protein_coding	Mal-A2
FBgn0002570	0.641803	0.00138633	0.00832603	protein_coding	Mal-A1
FBgn0002571	1.50435	6.46722e-08	1.72759e-06	protein_coding	Mal-A3
FBgn0002578	-0.660239	0.000998773	0.00641068	protein_coding	Kaz-m1
FBgn0002579	-0.421452	9.74762e-06	0.000130787	protein_coding	RpL36
FBgn0002590	-0.763917	4.98046e-09	1.83844e-07	protein_coding	RpS5a
FBgn0002593	-0.743619	4.83985e-09	1.80077e-07	protein_coding	RpLP1
FBgn0002609	0.4186	0.111419	0.240144	protein_coding	E(spl)m3-HLH
FBgn0002622	-0.580306	1.32686e-07	3.25238e-06	protein_coding	RpS3
FBgn0002626	-0.687501	1.14072e-08	3.7119e-07	protein_coding	RpL32
FBgn0002638	-0.154997	0.243305	0.415625	protein_coding	Rcc1
FBgn0002641	0.718437	0.000229163	0.00194206	protein_coding	mal
FBgn0002643	-0.597772	0.000479061	0.00353114	protein_coding	mam
FBgn0002645	0.188282	0.000404653	0.00307991	protein_coding	Map205
FBgn0002673	0.461306	0.144011	0.288054	protein_coding	twe
FBgn0002707	0.133138	0.414802	0.58951	protein_coding	mei-9
FBgn0002709	0.0954297	0.660243	0.788593	protein_coding	mei-218
FBgn0002715	0.230707	0.417194	0.591495	protein_coding	mei-S332
FBgn0002716	0.438267	0.231121	0.402041	protein_coding	mei-W68
FBgn0002719	0.700332	0.000110347	0.00105049	protein_coding	Men
FBgn0002723	-0.389117	0.0128158	0.0478084	protein_coding	Met
FBgn0002732	0.289998	0.228628	0.399095	protein_coding	E(spl)malpha-BFM
FBgn0002733	0.362245	0.136043	0.276798	protein_coding	E(spl)mbeta-HLH
FBgn0002736	0.228677	0.0764385	0.182386	protein_coding	mago
FBgn0002772	0.396409	0.0293707	0.0902873	protein_coding	Mlc1
FBgn0002773	0.500887	0.0030162	0.0153673	protein_coding	Mlc2
FBgn0002774	-0.18482	0.197623	0.360469	protein_coding	mle
FBgn0002775	-0.306857	0.0426277	0.117816	protein_coding	msl-3
FBgn0002778	0.573448	0.0653128	0.161979	protein_coding	mnd
FBgn0002780	-0.481528	0.000180794	0.00160345	protein_coding	mod
FBgn0002781	-0.11675	0.343426	0.523035	protein_coding	mod(mdg4)
FBgn0002783	-0.187574	0.0613068	0.154608	protein_coding	mor
FBgn0002787	0.0813033	0.360581	0.539918	protein_coding	Rpn8
FBgn0002789	0.739313	0.0004671	0.00347036	protein_coding	Mp20
FBgn0002791	0.0535432	0.736787	0.841455	protein_coding	mr
FBgn0002868	-1.51319	2.23742e-08	6.6758e-07	protein_coding	MtnA
FBgn0002869	0.158309	0.484226	0.651005	protein_coding	MtnB
FBgn0002872	0.343925	0.0882136	0.202116	protein_coding	mu2
FBgn0002873	0.48432	0.0782058	0.185617	protein_coding	mud
FBgn0002878	-0.0149571	0.947224	0.972109	protein_coding	mus101
FBgn0002887	0.147967	0.452186	0.623556	protein_coding	mus201
FBgn0002891	0.206619	0.184308	0.343241	protein_coding	DNApol-zeta
FBgn0002899	0.533377	0.04019	0.112984	protein_coding	mus301
FBgn0002901	-0.0891495	0.651179	0.782717	protein_coding	mus304
FBgn0002905	-0.2157	0.382441	0.559726	protein_coding	DNApol-theta
FBgn0002906	0.248542	0.33692	0.517629	protein_coding	Blm
FBgn0002909	-0.224818	0.10101	0.223249	protein_coding	mus312
FBgn0002914	-0.353042	0.000984705	0.00633781	protein_coding	Myb
FBgn0002921	0.130985	0.560989	0.714063	protein_coding	Atpalpha
FBgn0002922	-0.166172	0.619483	0.76093	protein_coding	nau
FBgn0002924	0.562188	0.00734548	0.031125	protein_coding	ncd
FBgn0002930	-0.511719	0.114343	0.245088	protein_coding	nec
FBgn0002931	-1.15146	0.00057196	0.00410887	protein_coding	net
FBgn0002932	0.142178	0.388693	0.565774	protein_coding	neur
FBgn0002939	-2.79341	5.41974e-25	3.37433e-22	protein_coding	ninaD
FBgn0002940	-1.42722	0.000235018	0.00197723	protein_coding	ninaE
FBgn0002945	-0.359394	0.16041	0.311411	protein_coding	nkd
FBgn0002948	0.151043	0.67507	0.798035	protein_coding	nod
FBgn0002973	0.225467	0.162362	0.313933	protein_coding	numb
FBgn0002985	-0.529679	0.0646188	0.160755	protein_coding	odd
FBgn0002989	0.0283128	0.8732	0.930171	protein_coding	okr
FBgn0003008	0.419431	0.00282474	0.0146232	protein_coding	or
FBgn0003015	-0.431795	0.273863	0.451156	protein_coding	osk
FBgn0003016	0.0178308	0.910255	0.951632	protein_coding	osp
FBgn0003023	0.139212	0.67933	0.801549	protein_coding	otu
FBgn0003028	-0.323304	0.367718	0.547269	protein_coding	ovo
FBgn0003041	0.811619	1.41666e-05	0.000180987	protein_coding	pbl
FBgn0003042	-0.11327	0.572623	0.723056	protein_coding	Pc
FBgn0003044	-0.140033	0.386816	0.564097	protein_coding	Pcl
FBgn0003046	2.87548	3.91076e-09	1.49683e-07	protein_coding	Pcp
FBgn0003048	0.279231	0.038182	0.108813	protein_coding	pcx
FBgn0003053	0.180298	0.0795195	0.188195	protein_coding	peb
FBgn0003062	-0.483821	7.80453e-05	0.000796574	protein_coding	Fib
FBgn0003067	-0.219095	0.502452	0.66717	protein_coding	Pepck1
FBgn0003068	-0.140808	0.463348	0.63356	protein_coding	per
FBgn0003071	-0.220305	0.119946	0.253984	protein_coding	Pfk
FBgn0003074	-0.504434	0.00108358	0.00686071	protein_coding	Pgi
FBgn0003076	0.369226	0.174681	0.330969	protein_coding	Pgm1
FBgn0003079	-0.193548	0.133413	0.273294	protein_coding	Raf
FBgn0003082	-0.496792	0.0118139	0.0448498	protein_coding	phr
FBgn0003090	-0.382059	0.14694	0.291787	protein_coding	pk
FBgn0003091	-0.0122998	0.969969	0.985606	protein_coding	Pkc53E
FBgn0003093	0.0224555	0.868983	0.927478	protein_coding	Pkc98E
FBgn0003116	-0.0109024	0.938206	0.966638	protein_coding	pn
FBgn0003118	-0.211153	0.149945	0.296121	protein_coding	pnt
FBgn0003124	0.680574	0.0212786	0.0710478	protein_coding	polo
FBgn0003130	-0.258501	0.44403	0.615983	protein_coding	Poxn
FBgn0003134	-0.0937993	0.492342	0.658458	protein_coding	Pp1alpha-96A
FBgn0003137	0.536468	0.00230448	0.0124618	protein_coding	Ppn
FBgn0003139	-0.170404	0.0374568	0.107303	protein_coding	PpV
FBgn0003141	-0.0963555	0.351533	0.531999	protein_coding	pr
FBgn0003149	0.638202	0.00699811	0.0299246	protein_coding	Prm
FBgn0003159	-0.348434	0.000917417	0.00599158	protein_coding	CG2841
FBgn0003162	-0.484157	0.100851	0.223081	protein_coding	Pu
FBgn0003165	-0.473141	0.00882132	0.0358253	protein_coding	pum
FBgn0003169	-0.053394	0.65883	0.787508	protein_coding	put
FBgn0003175	-0.408619	0.0057278	0.0255332	protein_coding	px
FBgn0003187	0.241613	0.477681	0.645315	protein_coding	qua
FBgn0003189	-0.737802	0.0021022	0.0115757	protein_coding	r
FBgn0003204	-0.331209	0.00312997	0.0158433	protein_coding	ras
FBgn0003205	0.411883	3.16605e-06	4.96937e-05	protein_coding	Ras85D
FBgn0003206	0.424276	0.00441982	0.0207734	protein_coding	Ras64B
FBgn0003209	-0.15923	0.429053	0.602998	protein_coding	raw
FBgn0003210	-0.120104	0.369171	0.548225	protein_coding	rb
FBgn0003218	0.0199473	0.928036	0.961496	protein_coding	rdgB
FBgn0003227	-0.0736701	0.812666	0.891099	protein_coding	rec
FBgn0003231	0.500282	4.62284e-06	6.87464e-05	protein_coding	ref(2)P
FBgn0003256	0.127025	0.328206	0.508384	protein_coding	rl
FBgn0003257	-0.528336	0.0143133	0.0523083	protein_coding	r-l
FBgn0003261	-0.472595	0.000829689	0.00551885	protein_coding	Rm62
FBgn0003268	0.336359	0.145397	0.289894	protein_coding	rod
FBgn0003274	-0.265378	0.0202549	0.0684124	protein_coding	RpLP2
FBgn0003275	-0.0560757	0.726479	0.834307	protein_coding	RpII18
FBgn0003277	-0.428772	1.9214e-06	3.20428e-05	protein_coding	RpII215
FBgn0003278	-0.565564	0.0033201	0.0166076	protein_coding	RpI135
FBgn0003279	-0.990896	1.90696e-12	1.77701e-10	protein_coding	RpL4
FBgn0003301	-0.954056	5.77313e-05	0.000615471	protein_coding	rut
FBgn0003302	-0.127327	0.637939	0.774635	protein_coding	rux
FBgn0003308	0.438006	0.0362039	0.104847	protein_coding	ry
FBgn0003310	-0.0968526	0.42006	0.594296	protein_coding	S
FBgn0003317	0.02149	0.867906	0.92707	protein_coding	sax
FBgn0003321	-0.489378	8.90824e-05	0.000884082	protein_coding	sbr
FBgn0003328	0.484963	0.0001665	0.00149514	NA	NA
FBgn0003330	-0.188679	0.192054	0.353626	protein_coding	Sce
FBgn0003334	-0.368469	0.000354749	0.00276084	protein_coding	Scm
FBgn0003345	-0.125196	0.07161	0.173525	protein_coding	sd
FBgn0003346	0.387854	0.0048365	0.0223383	protein_coding	RanGAP
FBgn0003353	0.451774	0.101835	0.224832	protein_coding	sei
FBgn0003356	-0.768218	0.0152365	0.0548759	protein_coding	Jon99Cii
FBgn0003357	-0.76777	0.0327611	0.0973142	protein_coding	Jon99Ciii
FBgn0003358	-0.0773449	0.845264	0.913119	protein_coding	Jon99Ci
FBgn0003360	-0.0924238	0.441615	0.613924	protein_coding	sesB
FBgn0003366	-0.322445	0.384461	0.561802	protein_coding	sev
FBgn0003371	0.253033	0.00440327	0.0207165	protein_coding	sgg
FBgn0003380	0.435169	0.179722	0.337846	protein_coding	Sh
FBgn0003386	0.418238	0.0543629	0.141814	protein_coding	Shaw
FBgn0003388	-0.366945	0.28637	0.464028	protein_coding	shd
FBgn0003390	-0.770494	0.000129507	0.00120345	protein_coding	shf
FBgn0003391	0.144678	0.163461	0.315275	protein_coding	shg
FBgn0003392	0.106644	0.107862	0.235089	protein_coding	shi
FBgn0003396	-0.0499753	0.731955	0.837815	protein_coding	shn
FBgn0003401	0.971809	0.0051304	0.02334	protein_coding	shu
FBgn0003410	-0.0294789	0.822417	0.898415	protein_coding	sina
FBgn0003415	-0.197906	0.209004	0.374859	protein_coding	skd
FBgn0003416	-0.00924679	0.921344	0.957553	protein_coding	sl
FBgn0003423	-0.225727	0.557956	0.711268	protein_coding	slgA
FBgn0003429	-1.43137	1.33014e-08	4.2109e-07	protein_coding	slo
FBgn0003435	-0.416402	0.0210581	0.0705133	protein_coding	sm
FBgn0003444	-0.138476	0.463136	0.633438	protein_coding	smo
FBgn0003447	-0.0819307	0.682044	0.803635	protein_coding	sn
FBgn0003449	0.0666018	0.529635	0.688223	protein_coding	snf
FBgn0003459	-0.100286	0.505271	0.668848	protein_coding	stwl
FBgn0003460	0.478268	0.173286	0.328927	protein_coding	so
FBgn0003462	-0.160322	0.0405188	0.113772	protein_coding	Sod1
FBgn0003463	-0.124384	0.496573	0.662035	protein_coding	sog
FBgn0003464	-0.200055	0.0495231	0.132673	protein_coding	sol
FBgn0003475	-0.278789	0.000839226	0.00556248	protein_coding	spir
FBgn0003479	0.0763408	0.725783	0.833816	protein_coding	spn-A
FBgn0003480	-0.23579	0.45593	0.626535	protein_coding	spn-B
FBgn0003483	0.927283	0.00217097	0.0119123	protein_coding	spn-E
FBgn0003495	-0.35504	0.253201	0.427371	protein_coding	spz
FBgn0003499	0.341987	0.359068	0.539035	protein_coding	sr
FBgn0003502	-0.577707	5.03373e-05	0.000547264	protein_coding	Btk29A
FBgn0003507	-1.16725	1.94948e-07	4.50649e-06	protein_coding	srp
FBgn0003510	0.519727	0.140517	0.283036	protein_coding	Sry-alpha
FBgn0003511	-0.0401393	0.835893	0.907051	protein_coding	Sry-beta
FBgn0003512	0.0700802	0.542056	0.698872	protein_coding	Sry-delta
FBgn0003514	0.40177	0.000203968	0.00177361	protein_coding	sqh
FBgn0003515	0.468286	0.0969687	0.216752	protein_coding	st
FBgn0003517	-1.0206	3.1661e-12	2.71268e-10	protein_coding	sta
FBgn0003520	-0.319164	0.0073496	0.0311283	protein_coding	stau
FBgn0003525	0.127252	0.723281	0.83258	protein_coding	stg
FBgn0003545	0.848122	0.0112	0.0430539	protein_coding	sub
FBgn0003557	0.000276793	0.998106	0.99939	protein_coding	Su(dx)
FBgn0003559	-0.0737524	0.514443	0.676911	protein_coding	su(f)
FBgn0003567	0.0733363	0.635705	0.773128	protein_coding	su(Hw)
FBgn0003575	-0.0592628	0.597166	0.741834	protein_coding	su(sable)
FBgn0003598	-0.160116	0.254982	0.429058	protein_coding	Su(var)3-7
FBgn0003607	0.11814	0.137382	0.278497	protein_coding	Su(var)205
FBgn0003612	-0.102765	0.402337	0.577799	protein_coding	Su(var)2-10
FBgn0003638	-0.542855	1.28143e-06	2.26654e-05	protein_coding	su(w[a])
FBgn0003651	-0.472865	0.182273	0.340654	protein_coding	svp
FBgn0003654	0.228286	0.00693453	0.0296935	protein_coding	sw
FBgn0003655	0.108399	0.789323	0.875667	protein_coding	swa
FBgn0003656	0.638242	4.1459e-05	0.000460387	protein_coding	sws
FBgn0003660	0.50933	7.59625e-08	1.99835e-06	protein_coding	Syb
FBgn0003676	0.115606	0.149582	0.295712	protein_coding	CCT1
FBgn0003687	0.0857283	0.604863	0.748188	protein_coding	Tbp
FBgn0003701	0.779061	0.0170464	0.0599609	protein_coding	thr
FBgn0003714	0.242609	0.0553233	0.143585	protein_coding	tko
FBgn0003716	-0.50852	3.21408e-05	0.000371211	protein_coding	tkv
FBgn0003721	0.370229	6.10099e-05	0.000646	protein_coding	Tm1
FBgn0003731	-0.35418	0.0277366	0.0868069	protein_coding	Egfr
FBgn0003741	0.0486063	0.822698	0.898617	protein_coding	tra
FBgn0003742	0.066853	0.619582	0.760951	protein_coding	tra2
FBgn0003744	0.10443	0.180274	0.338475	protein_coding	trc
FBgn0003748	0.0715434	0.674071	0.797663	protein_coding	Treh
FBgn0003862	-0.430984	0.000494659	0.00363178	protein_coding	trx
FBgn0003866	0.12103	0.587994	0.734496	protein_coding	tsh
FBgn0003867	-0.486481	0.106035	0.232075	protein_coding	tsl
FBgn0003870	-0.0112576	0.92495	0.95979	protein_coding	ttk
FBgn0003882	-0.0793833	0.566056	0.717919	protein_coding	tub
FBgn0003884	0.498081	1.17831e-05	0.000154989	protein_coding	alphaTub84B
FBgn0003885	0.214265	0.0181989	0.0629478	protein_coding	alphaTub84D
FBgn0003888	1.43909	6.22905e-10	2.93932e-08	protein_coding	betaTub60D
FBgn0003890	-0.211212	0.0508446	0.135127	protein_coding	betaTub97EF
FBgn0003891	-0.493162	8.49266e-05	0.000851912	protein_coding	tud
FBgn0003892	-0.376414	0.0820962	0.192686	protein_coding	ptc
FBgn0003896	-0.738919	0.0100465	0.0395756	protein_coding	tup
FBgn0003941	-0.696288	1.41678e-08	4.44275e-07	protein_coding	RpL40
FBgn0003942	-0.520708	1.03227e-06	1.88289e-05	protein_coding	RpS27A
FBgn0003943	0.567859	1.49165e-05	0.000189273	protein_coding	Ubi-p63E
FBgn0003944	-0.408636	0.204539	0.369475	protein_coding	Ubx
FBgn0003961	0.588466	0.0122785	0.0461446	protein_coding	Uro
FBgn0003963	-0.169218	0.386467	0.563883	protein_coding	ush
FBgn0003964	-0.210546	0.0506789	0.134802	protein_coding	usp
FBgn0003969	0.613888	9.39066e-05	0.000921665	protein_coding	vap
FBgn0003977	-0.302907	0.0111436	0.0429156	protein_coding	vir
FBgn0003978	0.162894	0.414847	0.58951	protein_coding	vls
FBgn0003984	1.07866	0.00041144	0.00312902	protein_coding	vn
FBgn0003996	0.518779	0.00138762	0.00832841	protein_coding	w
FBgn0003997	-0.389566	0.0341159	0.100317	protein_coding	hid
FBgn0004003	-0.0726609	0.836264	0.907069	protein_coding	wbl
FBgn0004045	-0.240025	0.493095	0.659272	protein_coding	Yp1
FBgn0004047	-0.255985	0.464669	0.634547	protein_coding	Yp3
FBgn0004049	0.128368	0.212471	0.378894	protein_coding	yrt
FBgn0004050	0.137157	0.285075	0.462991	protein_coding	z
FBgn0004055	-0.354608	0.082358	0.19311	protein_coding	uzip
FBgn0004057	-0.698808	0.000193986	0.00169947	protein_coding	Zw
FBgn0004066	0.509437	3.16166e-05	0.000366337	protein_coding	Prosalpha4
FBgn0004087	0.186257	0.288615	0.466651	protein_coding	Dhfr
FBgn0004101	0.130593	0.368159	0.547394	protein_coding	bs
FBgn0004103	0.0753617	0.261504	0.436417	protein_coding	Pp1-87B
FBgn0004106	0.866779	0.0108729	0.0421162	protein_coding	Cdk1
FBgn0004107	0.19736	0.482829	0.650294	protein_coding	Cdk2
FBgn0004108	0.184862	0.447675	0.619292	protein_coding	Nrt
FBgn0004117	0.431641	0.0427368	0.117943	protein_coding	Tm2
FBgn0004132	0.238402	0.0567273	0.146428	protein_coding	boca
FBgn0004133	-0.376794	0.31429	0.494077	protein_coding	blow
FBgn0004167	-0.0424	0.774543	0.865379	protein_coding	kst
FBgn0004168	0.137292	0.703874	0.819547	protein_coding	5-HT1A
FBgn0004169	0.567227	0.00638376	0.0278458	protein_coding	up
FBgn0004170	1.17032	0.000134561	0.00124423	protein_coding	sc
FBgn0004177	0.0972343	0.047735	0.128517	protein_coding	mts
FBgn0004179	0.0954065	0.288899	0.466949	protein_coding	Csp
FBgn0004197	-0.922907	1.94373e-05	0.000239796	protein_coding	Ser
FBgn0004198	0.327271	0.27271	0.45021	protein_coding	ct
FBgn0004227	-0.167892	0.0613878	0.154737	protein_coding	nonA
FBgn0004228	0.698515	3.69799e-05	0.0004176	protein_coding	mex1
FBgn0004237	0.0281907	0.813175	0.891319	protein_coding	Hrb87F
FBgn0004240	1.68363	2.086e-09	8.50705e-08	protein_coding	DptA
FBgn0004242	0.0463361	0.861538	0.924079	protein_coding	Syt1
FBgn0004359	0.0136885	0.967329	0.983754	protein_coding	T48
FBgn0004362	0.426595	0.00105262	0.00670661	protein_coding	HmgD
FBgn0004363	0.227528	0.00832664	0.0342717	protein_coding	porin
FBgn0004364	-0.520622	0.00209784	0.0115653	protein_coding	18w
FBgn0004367	-0.55612	0.0136018	0.0502085	protein_coding	mei-41
FBgn0004368	0.0588518	0.767057	0.861417	protein_coding	Ptp4E
FBgn0004369	-0.64792	1.66083e-05	0.00020736	protein_coding	Ptp99A
FBgn0004370	-0.427677	0.131312	0.270209	protein_coding	Ptp10D
FBgn0004373	0.00445386	0.9778	0.990205	protein_coding	fwd
FBgn0004374	-0.0123455	0.955931	0.977172	protein_coding	neb
FBgn0004378	0.462178	0.0876934	0.201612	protein_coding	Klp61F
FBgn0004379	0.51589	0.0923944	0.208776	protein_coding	Klp67A
FBgn0004380	0.134634	0.281425	0.459963	protein_coding	Klp64D
FBgn0004381	0.752526	2.97957e-06	4.73085e-05	protein_coding	Klp68D
FBgn0004387	-0.0647091	0.690489	0.809907	protein_coding	Klp98A
FBgn0004390	0.105527	0.591177	0.73725	protein_coding	RasGAP1
FBgn0004391	0.392535	0.00780959	0.0324727	protein_coding	shtd
FBgn0004394	0.0682865	0.720278	0.830659	protein_coding	pdm2
FBgn0004395	-0.106128	0.384657	0.561851	protein_coding	unk
FBgn0004396	-0.610801	1.05355e-06	1.91796e-05	protein_coding	CrebA
FBgn0004397	0.522785	5.25892e-05	0.000567815	protein_coding	Vinc
FBgn0004401	-0.252518	0.00822537	0.0340048	protein_coding	Pep
FBgn0004403	-0.627184	2.37861e-06	3.87676e-05	protein_coding	RpS14a
FBgn0004404	-0.623116	1.99362e-08	5.98663e-07	protein_coding	RpS14b
FBgn0004406	0.163481	0.342051	0.522106	protein_coding	tam
FBgn0004407	0.344055	0.0186468	0.0641105	protein_coding	DNApol-gamma35
FBgn0004419	0.117905	0.206882	0.372413	protein_coding	me31B
FBgn0004425	-0.618785	0.067419	0.165735	protein_coding	LysB
FBgn0004426	0.279544	0.432716	0.606319	pseudogene	LysC
FBgn0004427	-0.829914	0.00179464	0.0102133	protein_coding	LysD
FBgn0004428	-1.85338	6.60603e-07	1.30156e-05	protein_coding	LysE
FBgn0004429	-0.0338433	0.296722	0.475592	protein_coding	LysP
FBgn0004431	0.210427	0.503869	0.668007	protein_coding	LysX
FBgn0004432	0.180593	0.0434503	0.119313	protein_coding	Cyp1
FBgn0004435	0.137502	0.0609934	0.154024	protein_coding	Galphaq
FBgn0004436	0.206632	0.0040463	0.0193465	protein_coding	Ubc6
FBgn0004449	0.225766	0.187533	0.346986	protein_coding	Ten-m
FBgn0004456	0.481275	9.76106e-06	0.000130787	protein_coding	mew
FBgn0004463	-0.193244	0.154792	0.303448	protein_coding	RpIII128
FBgn0004465	-0.0145699	0.846621	0.914268	protein_coding	Su(P)
FBgn0004507	-0.309913	0.108267	0.235508	protein_coding	GlyP
FBgn0004509	0.283697	0.00939052	0.0376386	protein_coding	Fur1
FBgn0004510	0.405137	0.0540762	0.141145	protein_coding	Ets97D
FBgn0004512	-0.0989184	0.680981	0.802647	protein_coding	Mdr49
FBgn0004513	0.620209	0.0736494	0.176952	protein_coding	Mdr65
FBgn0004516	-0.380947	0.299432	0.478313	protein_coding	Gad1
FBgn0004552	-2.26005	7.43283e-07	1.44015e-05	protein_coding	Akh
FBgn0004556	-0.0193941	0.916517	0.955285	protein_coding	Dbp73D
FBgn0004569	0.0641441	0.786699	0.874536	protein_coding	aos
FBgn0004573	-1.64667	4.69117e-07	9.56568e-06	protein_coding	5-HT7
FBgn0004574	0.320513	0.00481331	0.0222623	protein_coding	Rop
FBgn0004575	-0.880539	0.000564645	0.00406571	protein_coding	Syn
FBgn0004580	0.848884	0.000725213	0.00496173	protein_coding	Cbp53E
FBgn0004583	-0.290734	0.0382567	0.108993	protein_coding	ex
FBgn0004584	0.990588	1.07324e-05	0.000142882	protein_coding	Rrp1
FBgn0004587	-0.278318	0.0011936	0.00741156	protein_coding	B52
FBgn0004595	-0.00121769	0.993994	0.998377	protein_coding	pros
FBgn0004597	0.315877	0.00997881	0.0393714	protein_coding	CycC
FBgn0004598	-0.0249935	0.896958	0.944385	protein_coding	Fur2
FBgn0004606	-0.659125	0.0810723	0.191099	protein_coding	zfh1
FBgn0004607	1.41594	2.11309e-05	0.0002583	protein_coding	zfh2
FBgn0004611	-0.00832024	0.96482	0.982351	protein_coding	Plc21C
FBgn0004620	-0.18015	0.588053	0.734496	protein_coding	GluRIIA
FBgn0004622	-0.76081	0.0124326	0.0465923	protein_coding	TkR99D
FBgn0004629	0.195503	0.209323	0.374926	protein_coding	Cys
FBgn0004635	1.4835	1.46276e-06	2.53445e-05	protein_coding	rho
FBgn0004636	-0.0823468	0.274294	0.451462	protein_coding	Rap1
FBgn0004638	0.0591935	0.607379	0.750008	protein_coding	drk
FBgn0004643	-0.00738637	0.951479	0.974703	protein_coding	Zw10
FBgn0004644	-0.0943819	0.734221	0.839277	protein_coding	hh
FBgn0004646	-0.959938	2.70047e-05	0.000317628	protein_coding	ogre
FBgn0004647	0.438261	0.0155396	0.0557098	protein_coding	N
FBgn0004648	0.248213	0.00453675	0.0211962	protein_coding	svr
FBgn0004649	-0.102985	0.790576	0.876343	protein_coding	yl
FBgn0004652	-0.361463	0.0449311	0.1223	protein_coding	fru
FBgn0004654	-0.245071	0.0219973	0.0729002	protein_coding	Pgd
FBgn0004655	-0.20483	0.0987694	0.21934	protein_coding	wapl
FBgn0004656	-0.13139	0.199114	0.362058	protein_coding	fs(1)h
FBgn0004657	0.475884	0.00199736	0.0111098	protein_coding	mys
FBgn0004687	-0.0161321	0.849622	0.916404	protein_coding	Mlc-c
FBgn0004698	-0.398176	0.000517736	0.00376275	protein_coding	Xpc
FBgn0004795	-0.634264	0.00905636	0.0365819	protein_coding	retn
FBgn0004797	-0.0697916	0.728422	0.835819	protein_coding	mdy
FBgn0004811	0.0669996	0.677845	0.800303	protein_coding	fs(2)ltoPP43
FBgn0004828	0.0466612	0.457706	0.628421	protein_coding	His3.3B
FBgn0004832	0.0767534	0.70753	0.821269	protein_coding	Xpac
FBgn0004837	-0.236005	0.409025	0.584348	protein_coding	Su(H)
FBgn0004838	-0.0731774	0.120619	0.255144	protein_coding	Hrb27C
FBgn0004839	-0.0283111	0.912061	0.952416	protein_coding	otk
FBgn0004842	0.00289454	0.992237	0.99747	protein_coding	RYa-R
FBgn0004852	-0.307413	0.149947	0.296121	protein_coding	Ac76E
FBgn0004855	0.189116	0.112036	0.241251	protein_coding	RpII15
FBgn0004856	-0.0331761	0.705218	0.820076	protein_coding	Bx42
FBgn0004858	-0.041619	0.788069	0.875017	protein_coding	elB
FBgn0004859	0.0835851	0.788645	0.875345	protein_coding	ci
FBgn0004860	-0.106342	0.70649	0.820839	protein_coding	ph-d
FBgn0004861	-0.0260051	0.861953	0.924268	protein_coding	ph-p
FBgn0004864	-0.131403	0.342486	0.522206	protein_coding	hop
FBgn0004865	0.493364	0.0363059	0.105005	protein_coding	Eip78C
FBgn0004867	-0.827688	1.31916e-09	5.83867e-08	protein_coding	RpS2
FBgn0004868	0.421676	4.48074e-05	0.000492301	protein_coding	Gdi
FBgn0004870	-0.437397	0.116425	0.248296	protein_coding	bab1
FBgn0004875	-0.0698283	0.437495	0.610727	protein_coding	enc
FBgn0004876	-0.413661	0.000302771	0.00243128	protein_coding	cdi
FBgn0004882	-0.325511	0.41817	0.59258	protein_coding	orb
FBgn0004885	-0.174695	0.606696	0.749661	protein_coding	tok
FBgn0004888	-0.0789415	0.449838	0.620996	protein_coding	Scsalpha1
FBgn0004889	-0.0564333	0.758169	0.855758	protein_coding	tws
FBgn0004892	-0.26331	0.311885	0.491677	protein_coding	sob
FBgn0004893	-0.432257	0.0151526	0.0546161	protein_coding	bowl
FBgn0004901	-0.0756366	0.482382	0.649882	protein_coding	Prat
FBgn0004903	-0.171926	0.196111	0.358675	protein_coding	Rb97D
FBgn0004907	-0.0660061	0.441366	0.613837	protein_coding	14-3-3zeta
FBgn0004908	0.416067	0.079004	0.187263	protein_coding	Arl2
FBgn0004910	-0.112463	0.376435	0.554674	protein_coding	Eip63F-1
FBgn0004911	-0.450063	0.223654	0.393571	ncRNA	asRNA:Eig63F-2
FBgn0004913	-0.0423522	0.703151	0.819038	protein_coding	Gnf1
FBgn0004914	-0.151327	0.0890663	0.203408	protein_coding	Hnf4
FBgn0004915	0.270956	0.0475459	0.12811	protein_coding	TfIIB
FBgn0004919	-0.556067	0.00157109	0.00915982	protein_coding	gol
FBgn0004921	0.209913	0.013817	0.050882	protein_coding	Ggamma1
FBgn0004924	-0.181325	0.0331121	0.0980015	protein_coding	Top1
FBgn0004926	-0.0289407	0.772377	0.864283	protein_coding	eIF2beta
FBgn0004957	0.0699765	0.725672	0.833791	protein_coding	por
FBgn0005198	0.030745	0.762897	0.859018	protein_coding	gig
FBgn0005278	-0.687664	6.22857e-08	1.67151e-06	protein_coding	Sam-S
FBgn0005322	-0.146549	0.298186	0.476853	protein_coding	nmd
FBgn0005355	0.137462	0.453164	0.623928	protein_coding	Su(fu)
FBgn0005386	-0.290477	0.0580222	0.148824	protein_coding	ash1
FBgn0005391	0.0529543	0.8728	0.930064	protein_coding	Yp2
FBgn0005411	-0.12939	0.169686	0.323937	protein_coding	U2af50
FBgn0005427	-0.356488	0.00727038	0.0308908	protein_coding	ewg
FBgn0005533	-0.643208	2.80362e-09	1.10013e-07	protein_coding	RpS17
FBgn0005536	0.152865	0.100894	0.223123	protein_coding	Mbs
FBgn0005564	0.243275	0.278705	0.456796	protein_coding	Shal
FBgn0005585	0.0418428	0.708212	0.821512	protein_coding	Calr
FBgn0005586	0.517451	0.00255813	0.0135587	protein_coding	Rab3
FBgn0005593	-0.844486	4.57232e-09	1.73581e-07	protein_coding	RpL7
FBgn0005596	-0.176474	0.352111	0.532443	protein_coding	yem
FBgn0005612	0.555941	0.000154467	0.00139648	protein_coding	Sox14
FBgn0005614	0.00767513	0.98091	0.991549	protein_coding	trpl
FBgn0005616	-0.0581577	0.751708	0.851304	protein_coding	msl-2
FBgn0005617	-0.224666	0.140185	0.282517	protein_coding	msl-1
FBgn0005624	0.100133	0.555898	0.709516	protein_coding	Psc
FBgn0005626	0.456176	0.0626757	0.157389	protein_coding	ple
FBgn0005631	0.0980049	0.537849	0.695317	protein_coding	robo1
FBgn0005632	-0.18699	0.0340826	0.100251	protein_coding	faf
FBgn0005633	-1.99987	5.02462e-07	1.01569e-05	protein_coding	fln
FBgn0005636	0.221172	0.470594	0.639627	protein_coding	nvy
FBgn0005638	0.649273	0.0432142	0.118804	protein_coding	slbo
FBgn0005640	0.0085846	0.945169	0.97074	protein_coding	Eip63E
FBgn0005642	-0.49844	0.000404012	0.00307755	protein_coding	wdn
FBgn0005648	0.161207	0.258474	0.433373	protein_coding	Pabp2
FBgn0005649	0.231235	0.00407603	0.0194612	protein_coding	Rox8
FBgn0005654	0.295005	0.260151	0.435014	protein_coding	Orc3
FBgn0005655	1.30193	9.49179e-08	2.42196e-06	protein_coding	PCNA
FBgn0005659	-0.890092	0.0173428	0.0607975	protein_coding	Ets98B
FBgn0005660	0.556373	0.0653315	0.161979	protein_coding	Ets21C
FBgn0005664	1.35528	2.53876e-05	0.00029974	protein_coding	Crys
FBgn0005666	0.60813	0.014587	0.0529659	protein_coding	bt
FBgn0005670	-1.62073	1.0747e-19	3.40807e-17	protein_coding	Cyp4d1
FBgn0005671	-0.172728	0.0183351	0.0633487	protein_coding	Vha55
FBgn0005672	0.115851	0.464032	0.634215	protein_coding	spi
FBgn0005674	-0.266484	0.0230843	0.0755906	protein_coding	GluProRS
FBgn0005677	0.342971	0.244051	0.416573	protein_coding	dac
FBgn0005683	0.136648	0.697141	0.815251	protein_coding	pie
FBgn0005694	-0.327299	0.00851757	0.0348273	protein_coding	Aef1
FBgn0005695	0.041817	0.790554	0.876343	protein_coding	gcl
FBgn0005696	0.867576	0.000477825	0.00353016	protein_coding	DNApol-alpha73
FBgn0005771	-0.123223	0.14532	0.289864	protein_coding	noc
FBgn0005777	0.183365	0.0326169	0.0969784	protein_coding	PpD3
FBgn0008635	0.0336257	0.674048	0.797663	protein_coding	betaCOP
FBgn0008646	-0.0182218	0.956974	0.977789	protein_coding	E5
FBgn0010014	0.218249	0.481169	0.648551	protein_coding	CanB
FBgn0010015	-0.225189	0.550397	0.705098	protein_coding	CanA1
FBgn0010019	-0.559879	0.0515326	0.136451	protein_coding	Cyp4g1
FBgn0010038	2.27038	5.34717e-13	5.9449e-11	protein_coding	GstD2
FBgn0010039	0.668614	0.0128185	0.0478084	protein_coding	GstD3
FBgn0010040	1.68465	3.86528e-07	8.11188e-06	protein_coding	GstD4
FBgn0010041	1.85469	1.75317e-14	2.59886e-12	protein_coding	GstD5
FBgn0010043	0.944837	1.54968e-05	0.000195838	protein_coding	GstD7
FBgn0010044	2.02275	5.06122e-23	2.48772e-20	protein_coding	GstD8
FBgn0010051	-0.621891	2.17353e-06	3.58386e-05	protein_coding	Itpr
FBgn0010053	-0.921445	3.6681e-07	7.76789e-06	protein_coding	Jheh1
FBgn0010078	-0.481842	3.51438e-06	5.42493e-05	protein_coding	RpL23
FBgn0010100	-0.498632	0.000101542	0.000983713	protein_coding	mAcon1
FBgn0010105	-0.144755	0.642465	0.777804	protein_coding	comm
FBgn0010113	0.0783281	0.451325	0.622957	protein_coding	hdc
FBgn0010173	0.462516	0.000112648	0.00107021	protein_coding	RpA-70
FBgn0010194	0.249172	0.426026	0.600099	protein_coding	Wnt5
FBgn0010198	-0.544851	1.41281e-06	2.46161e-05	protein_coding	RpS15Aa
FBgn0010213	-0.351339	0.00424622	0.0201297	protein_coding	Sod2
FBgn0010215	0.375438	0.000975899	0.00630292	protein_coding	alpha-Cat
FBgn0010217	-0.195627	0.0661403	0.163365	protein_coding	ATPsynbeta
FBgn0010220	-0.392758	0.0153598	0.0552554	protein_coding	Dbp45A
FBgn0010222	0.314952	0.219448	0.388223	protein_coding	Nmdmc
FBgn0010223	0.34264	0.0290551	0.089701	protein_coding	Galphaf
FBgn0010225	0.066683	0.711656	0.824176	protein_coding	Gel
FBgn0010226	0.746472	0.000712998	0.00489665	protein_coding	GstS1
FBgn0010228	0.10241	0.315501	0.495276	protein_coding	HmgZ
FBgn0010235	0.204665	0.0179929	0.0625365	protein_coding	Klc
FBgn0010238	-0.499661	0.0272795	0.0858476	protein_coding	Lac
FBgn0010240	-0.272707	0.410347	0.585074	protein_coding	Lcch3
FBgn0010241	-0.611528	0.0062424	0.0273058	protein_coding	Mdr50
FBgn0010246	0.0462605	0.63055	0.769062	protein_coding	Myo61F
FBgn0010247	0.470287	0.000453843	0.00338804	protein_coding	Parp
FBgn0010263	0.521206	0.057072	0.147074	protein_coding	Rbp9
FBgn0010265	-0.703996	7.89879e-07	1.51472e-05	protein_coding	RpS13
FBgn0010269	0.162417	0.109458	0.237287	protein_coding	Dsor1
FBgn0010278	0.262591	0.0501524	0.133758	protein_coding	Ssrp
FBgn0010280	-0.443252	7.67671e-06	0.000107004	protein_coding	Taf4
FBgn0010282	-0.0168782	0.860674	0.923571	protein_coding	TfIIFalpha
FBgn0010287	0.028913	0.911123	0.95208	protein_coding	Trf
FBgn0010288	0.756662	1.32263e-12	1.28667e-10	protein_coding	Uch
FBgn0010292	-0.201377	0.161681	0.31281	protein_coding	bys
FBgn0010300	0.0122064	0.926117	0.960394	protein_coding	brat
FBgn0010303	0.172801	0.0343194	0.100679	protein_coding	hep
FBgn0010309	0.0954417	0.628422	0.767012	protein_coding	pigeon
FBgn0010313	-0.0447627	0.769343	0.862222	protein_coding	corto
FBgn0010314	0.727654	0.0409847	0.114637	protein_coding	Cks30A
FBgn0010315	-0.170059	0.312832	0.49265	protein_coding	CycD
FBgn0010316	-0.228044	0.183505	0.34234	protein_coding	dap
FBgn0010328	-0.294437	0.0079553	0.0329905	protein_coding	woc
FBgn0010333	0.204513	0.0084607	0.0346251	protein_coding	Rac1
FBgn0010339	-0.211998	0.0316496	0.0947964	protein_coding	128up
FBgn0010340	0.128451	0.336149	0.516842	protein_coding	140up
FBgn0010341	0.210196	0.00583519	0.025876	protein_coding	Cdc42
FBgn0010342	0.0489647	0.788054	0.875017	protein_coding	Map60
FBgn0010348	0.076256	0.337589	0.517948	protein_coding	Arf79F
FBgn0010350	-0.274636	0.00602833	0.0265434	protein_coding	Cds
FBgn0010352	-0.263726	0.0758517	0.181217	protein_coding	Nc73EF
FBgn0010355	-0.331694	0.000308575	0.0024694	protein_coding	Taf1
FBgn0010356	0.116381	0.441785	0.614054	protein_coding	Taf5
FBgn0010357	-0.268313	0.389534	0.566028	protein_coding	betaTry
FBgn0010358	-1.1082	0.00403317	0.0193257	protein_coding	deltaTry
FBgn0010359	-1.0449	0.00487377	0.0224218	protein_coding	gammaTry
FBgn0010379	0.107316	0.237427	0.4088	protein_coding	Akt1
FBgn0010380	0.159941	0.0599262	0.152244	protein_coding	AP-1-2beta
FBgn0010382	0.86984	0.00181622	0.0103299	protein_coding	CycE
FBgn0010383	-0.441152	0.223702	0.393571	protein_coding	Cyp18a1
FBgn0010385	0.756017	0.0284639	0.08848	protein_coding	Def
FBgn0010387	0.813628	3.66017e-19	1.03583e-16	protein_coding	Acbp2
FBgn0010388	2.25497	8.46322e-11	4.90919e-09	protein_coding	Dro
FBgn0010389	0.295656	0.262538	0.437594	protein_coding	htl
FBgn0010391	-0.324261	0.0026352	0.0139056	protein_coding	SrpRalpha
FBgn0010395	0.237933	0.0262056	0.0834986	protein_coding	Itgbn
FBgn0010397	0.327416	0.0499105	0.133442	protein_coding	LamC
FBgn0010398	0.4019	0.0995167	0.2206	protein_coding	Lrr47
FBgn0010406	-0.323581	0.00246749	0.0131981	protein_coding	RNaseX25
FBgn0010408	-0.634848	8.00842e-08	2.08912e-06	protein_coding	RpS9
FBgn0010409	-0.937048	3.28478e-10	1.64046e-08	protein_coding	RpL18A
FBgn0010411	-0.320293	0.000922729	0.00602192	protein_coding	RpS18
FBgn0010412	-0.703662	8.20742e-08	2.13507e-06	protein_coding	RpS19a
FBgn0010415	0.272425	0.0265532	0.0842038	protein_coding	Sdc
FBgn0010416	-0.0175613	0.863826	0.925319	protein_coding	TH1
FBgn0010417	-0.137766	0.229606	0.400283	protein_coding	Taf6
FBgn0010421	-0.0603353	0.700117	0.817095	protein_coding	TfIIFbeta
FBgn0010422	-0.198578	0.160424	0.311411	protein_coding	TfIIS
FBgn0010423	0.382587	0.14909	0.295051	protein_coding	TpnC47D
FBgn0010424	0.810921	0.0010807	0.00685176	protein_coding	TpnC73F
FBgn0010425	-0.395578	0.289267	0.467221	protein_coding	epsilonTry
FBgn0010434	0.163488	0.242712	0.414992	protein_coding	cora
FBgn0010435	-0.418788	0.00401773	0.0192817	protein_coding	emp
FBgn0010438	-0.285455	0.0952331	0.214014	protein_coding	mtSSB
FBgn0010441	0.0607582	0.697021	0.815214	protein_coding	pll
FBgn0010452	0.262188	0.317386	0.497077	protein_coding	trn
FBgn0010453	0.036209	0.904405	0.949293	protein_coding	Wnt4
FBgn0010470	0.682619	1.5952e-15	2.86493e-13	protein_coding	Fkbp14
FBgn0010473	0.30937	0.340788	0.521058	protein_coding	tutl
FBgn0010482	1.02425	2.45887e-10	1.26869e-08	protein_coding	l(2)01289
FBgn0010488	-0.0420456	0.636091	0.773395	protein_coding	NAT1
FBgn0010497	-0.392476	0.159915	0.31081	protein_coding	dmGlut
FBgn0010501	-0.773773	5.91234e-09	2.14013e-07	protein_coding	Dcp-1
FBgn0010504	0.0736773	0.327822	0.508053	protein_coding	kermit
FBgn0010516	-0.189657	0.00996091	0.039334	protein_coding	wal
FBgn0010520	-0.441354	0.00775705	0.0323118	protein_coding	Bka
FBgn0010531	-0.199184	0.231478	0.402191	protein_coding	Ccs
FBgn0010548	-0.0762621	0.569433	0.72063	protein_coding	Aldh-III
FBgn0010549	0.0280267	0.884696	0.937073	protein_coding	l(2)03659
FBgn0010551	0.159926	0.0502578	0.133987	protein_coding	Phb2
FBgn0010583	0.230695	0.235411	0.406829	protein_coding	dock
FBgn0010590	0.1589	0.134802	0.275293	protein_coding	Prosbeta1
FBgn0010591	0.373957	0.00282441	0.0146232	protein_coding	Sply
FBgn0010602	-0.258549	0.0110455	0.042661	protein_coding	lwr
FBgn0010607	-0.197537	0.467348	0.636605	protein_coding	l(2)05714
FBgn0010611	0.299798	0.0140123	0.0514262	protein_coding	Hmgs
FBgn0010612	0.182698	0.139426	0.28139	protein_coding	ATPsynG
FBgn0010620	-0.368805	0.0159953	0.0569316	protein_coding	CG10939
FBgn0010621	0.0567762	0.468979	0.638082	protein_coding	CCT5
FBgn0010622	0.239892	0.0689157	0.168615	protein_coding	DCTN3-p24
FBgn0010638	-0.0402274	0.699386	0.816732	protein_coding	Sec61beta
FBgn0010651	0.00462795	0.983288	0.992506	protein_coding	MFS14
FBgn0010660	-0.182181	0.195248	0.357533	protein_coding	Nup214
FBgn0010741	0.0237229	0.823224	0.898675	protein_coding	Pfdn2
FBgn0010747	-0.366665	0.00268522	0.0141042	protein_coding	Srp54k
FBgn0010750	0.0391408	0.792474	0.87811	protein_coding	atms
FBgn0010762	-0.0705817	0.648392	0.781134	protein_coding	simj
FBgn0010768	-0.189838	0.476829	0.644724	protein_coding	sqz
FBgn0010770	-0.270504	0.0770316	0.183426	protein_coding	ppan
FBgn0010772	-0.415681	0.00134414	0.00814048	protein_coding	Xe7
FBgn0010774	0.440962	1.00939e-06	1.85565e-05	protein_coding	Ref1
FBgn0010786	-0.153617	0.401477	0.577096	protein_coding	l(3)02640
FBgn0010803	0.232156	0.0246033	0.0792856	protein_coding	TrpRS
FBgn0010808	-0.213855	0.0610223	0.154024	protein_coding	Chchd3
FBgn0010812	0.291072	6.40219e-05	0.000671798	protein_coding	unc-45
FBgn0010825	-0.302043	0.000643633	0.00450929	protein_coding	Gug
FBgn0010830	-0.442447	0.00214489	0.0117969	protein_coding	l(3)04053
FBgn0010877	-0.112251	0.386476	0.563883	protein_coding	l(3)05822
FBgn0010894	-0.437901	0.0626269	0.157309	protein_coding	sinu
FBgn0010905	-0.305318	0.0122718	0.0461379	protein_coding	Spn
FBgn0010909	0.362477	0.0204714	0.0689939	protein_coding	msn
FBgn0010926	0.156948	0.0596684	0.151837	protein_coding	l(3)07882
FBgn0011016	-0.136849	0.29618	0.474936	protein_coding	SsRbeta
FBgn0011020	-0.0518883	0.856076	0.919799	protein_coding	Sas-4
FBgn0011202	-0.0918394	0.478556	0.64631	protein_coding	dia
FBgn0011204	-0.668353	1.01672e-07	2.57321e-06	protein_coding	cue
FBgn0011205	0.307173	0.0033346	0.0166623	protein_coding	fbl
FBgn0011206	-0.896075	1.63927e-06	2.80387e-05	protein_coding	bol
FBgn0011207	0.0075123	0.94724	0.972109	protein_coding	pelo
FBgn0011211	-0.268837	0.0295231	0.0906664	protein_coding	blw
FBgn0011217	0.0868507	0.247689	0.420653	protein_coding	eff
FBgn0011224	-0.121988	0.523659	0.684269	protein_coding	heph
FBgn0011225	0.187217	0.0426691	0.117895	protein_coding	jar
FBgn0011227	0.108171	0.361131	0.540481	protein_coding	ox
FBgn0011230	-0.320158	0.00197464	0.0110294	protein_coding	poe
FBgn0011232	0.0443972	0.755598	0.853888	protein_coding	scat
FBgn0011236	-0.351279	0.0455106	0.123589	protein_coding	ken
FBgn0011259	0.123519	0.613377	0.754919	protein_coding	Sema1a
FBgn0011260	1.21448	3.00332e-15	5.00857e-13	protein_coding	Sema2a
FBgn0011272	-0.723596	1.58859e-07	3.77503e-06	protein_coding	RpL13
FBgn0011274	0.00451904	0.984909	0.993204	protein_coding	Dif
FBgn0011284	-0.916711	4.64445e-09	1.74623e-07	protein_coding	RpS4
FBgn0011286	0.463844	0.0837159	0.194871	protein_coding	RyR
FBgn0011289	0.0403753	0.736938	0.841455	protein_coding	TfIIA-L
FBgn0011290	-0.0563561	0.637279	0.774235	protein_coding	Taf12
FBgn0011291	0.463875	0.00608141	0.0267267	protein_coding	Taf11
FBgn0011296	0.21511	0.352061	0.532443	protein_coding	l(2)efl
FBgn0011297	-0.187835	0.20063	0.364114	protein_coding	Alg3
FBgn0011300	-0.0853352	0.246273	0.419048	protein_coding	babo
FBgn0011305	-0.0656753	0.56397	0.716392	protein_coding	Rsf1
FBgn0011327	0.342533	0.0112026	0.0430539	protein_coding	Uch-L5
FBgn0011335	0.24125	0.174783	0.331096	protein_coding	vers
FBgn0011336	-0.244446	0.0528187	0.138677	protein_coding	Stt3B
FBgn0011361	0.306072	0.00299357	0.0152938	protein_coding	ND-ACP
FBgn0011455	-0.30308	0.00738598	0.0311975	protein_coding	ND-SGDH
FBgn0011474	-0.196154	0.214845	0.381961	protein_coding	PR-Set7
FBgn0011476	0.118929	0.522502	0.683806	protein_coding	l(3)neo43
FBgn0011481	-0.175056	0.0312361	0.0939195	protein_coding	Ssdp
FBgn0011509	-0.18147	0.0356693	0.103742	protein_coding	SrpRbeta
FBgn0011554	0.438123	4.3342e-05	0.000478453	protein_coding	etaTry
FBgn0011555	-1.18741	4.83399e-06	7.13185e-05	protein_coding	thetaTry
FBgn0011556	-0.570612	0.0104608	0.0408419	protein_coding	zetaTry
FBgn0011566	-0.0815549	0.672577	0.797006	protein_coding	Smyd3
FBgn0011570	0.392717	7.49394e-05	0.000769922	protein_coding	cpb
FBgn0011573	-0.0327437	0.702407	0.818744	protein_coding	Cdc37
FBgn0011576	-0.142764	0.107959	0.235184	protein_coding	Cyp4d2
FBgn0011584	-0.497414	1.74888e-09	7.39039e-08	protein_coding	Trp1
FBgn0011586	0.368695	0.000582293	0.00416388	protein_coding	e(r)
FBgn0011589	-0.0598869	0.843314	0.911857	protein_coding	Elk
FBgn0011591	0.0714757	0.740104	0.84376	protein_coding	fng
FBgn0011592	0.24452	0.0684519	0.167744	protein_coding	fra
FBgn0011603	-0.257019	0.410168	0.584908	protein_coding	ine
FBgn0011604	-0.1563	0.145153	0.289717	protein_coding	Iswi
FBgn0011606	0.0659372	0.78784	0.874999	protein_coding	Klp3A
FBgn0011638	0.0613848	0.628203	0.767012	protein_coding	La
FBgn0011640	-0.0919593	0.328846	0.508807	protein_coding	lark
FBgn0011642	0.275847	0.0126132	0.0471744	protein_coding	Zyx
FBgn0011648	0.152536	0.0588838	0.150415	protein_coding	Mad
FBgn0011655	-0.0645323	0.477022	0.644892	protein_coding	Med
FBgn0011656	-0.192001	0.166486	0.319723	protein_coding	Mef2
FBgn0011659	0.547205	0.0188982	0.0648385	protein_coding	Mlh1
FBgn0011660	0.77996	0.00599995	0.0264559	protein_coding	Pms2
FBgn0011661	-0.051353	0.704443	0.819685	protein_coding	Moe
FBgn0011666	-0.230585	0.366681	0.545901	protein_coding	msi
FBgn0011672	-0.347938	0.0159645	0.0568911	protein_coding	Mvl
FBgn0011674	0.832125	6.12391e-07	1.21683e-05	protein_coding	insc
FBgn0011692	0.553408	0.104768	0.229893	protein_coding	pav
FBgn0011695	-0.516665	0.00420397	0.0199598	protein_coding	EbpIII
FBgn0011703	1.13339	2.48673e-07	5.51629e-06	protein_coding	RnrL
FBgn0011704	0.128741	0.429551	0.603473	protein_coding	RnrS
FBgn0011705	-0.385265	0.123819	0.260262	protein_coding	rost
FBgn0011708	0.21483	0.0344342	0.100936	protein_coding	Syx5
FBgn0011710	0.449365	0.000618271	0.00437096	protein_coding	Sep1
FBgn0011715	0.0921097	0.458518	0.628882	protein_coding	Snr1
FBgn0011722	-0.153638	0.636859	0.773926	protein_coding	Tig
FBgn0011723	-0.216076	0.55136	0.705847	protein_coding	byn
FBgn0011725	-0.115604	0.226467	0.396806	protein_coding	twin
FBgn0011726	0.731922	3.79239e-07	7.99483e-06	protein_coding	tsr
FBgn0011737	0.0730981	0.644798	0.779303	protein_coding	Wee1
FBgn0011739	-0.351289	0.00137653	0.00828847	protein_coding	wts
FBgn0011740	0.075185	0.769265	0.862222	protein_coding	alpha-Man-IIa
FBgn0011741	-0.00879546	0.948332	0.972451	protein_coding	Arp6
FBgn0011742	0.247914	0.0265521	0.0842038	protein_coding	Arp2
FBgn0011745	0.364141	0.0070965	0.030276	protein_coding	Arp1
FBgn0011746	1.45971	3.05859e-05	0.000355718	protein_coding	ana
FBgn0011747	0.0737587	0.290315	0.468426	protein_coding	Ank
FBgn0011754	0.335798	0.25399	0.428239	protein_coding	PhKgamma
FBgn0011760	0.0611298	0.42726	0.601112	protein_coding	ctp
FBgn0011761	0.396126	0.299493	0.478313	protein_coding	dhd
FBgn0011762	0.944455	0.00111595	0.00703014	protein_coding	DNApol-alpha50
FBgn0011763	-0.275979	0.00564451	0.0252486	protein_coding	Dp
FBgn0011766	-0.162399	0.0316213	0.0947964	protein_coding	E2f1
FBgn0011768	-0.0230092	0.819156	0.896159	protein_coding	Fdh
FBgn0011769	-0.078603	0.692153	0.811247	protein_coding	Fdx1
FBgn0011770	0.644139	0.0027034	0.0141678	protein_coding	Gip
FBgn0011771	0.208279	0.00811961	0.0335973	protein_coding	Hem
FBgn0011774	0.0978143	0.617627	0.759049	protein_coding	Irbp
FBgn0011785	-0.242817	0.0597823	0.152044	protein_coding	BRWD3
FBgn0011787	-0.116532	0.369893	0.5487	protein_coding	mRpL12
FBgn0011802	0.26052	0.326445	0.506761	protein_coding	Gem3
FBgn0011817	0.31053	0.0257136	0.0820774	protein_coding	nmo
FBgn0011818	-0.202379	0.149379	0.295374	protein_coding	oaf
FBgn0011822	0.440534	0.00016782	0.00150554	protein_coding	Pgcl
FBgn0011824	-0.747167	6.80404e-07	1.33493e-05	protein_coding	CG4038
FBgn0011826	-0.204017	0.0100561	0.0395926	protein_coding	Pp2B-14D
FBgn0011828	0.0266803	0.911534	0.95214	protein_coding	Pxn
FBgn0011829	0.513247	0.112349	0.241758	protein_coding	Ret
FBgn0011834	1.10916	3.55658e-11	2.29069e-09	protein_coding	Ser6
FBgn0011836	-0.0913987	0.489277	0.655857	protein_coding	Taf2
FBgn0011837	0.0337701	0.79598	0.88005	protein_coding	Tis11
FBgn0012034	0.0483617	0.79467	0.879688	protein_coding	AcCoAS
FBgn0012036	0.282748	0.0296121	0.0908368	protein_coding	Aldh
FBgn0012037	-0.542701	1.26213e-10	6.93353e-09	protein_coding	Ance
FBgn0012051	-0.0163395	0.911448	0.95214	protein_coding	CalpA
FBgn0012058	-0.148999	0.319915	0.499166	protein_coding	Cdc27
FBgn0012344	-0.859814	0.0289459	0.089512	protein_coding	Dh44
FBgn0013263	-0.07864	0.422184	0.59683	protein_coding	Trl
FBgn0013269	-0.322956	0.0134507	0.0498083	protein_coding	Fkbp39
FBgn0013272	-0.287778	0.00254557	0.0135305	protein_coding	Gp150
FBgn0013276	1.01978	0.00267089	0.0140526	protein_coding	Hsp70Ab
FBgn0013277	1.49429	9.22391e-06	0.000125389	protein_coding	Hsp70Ba
FBgn0013278	1.23458	4.33262e-06	6.53307e-05	protein_coding	Hsp70Bb
FBgn0013279	0.395582	0.248705	0.42184	protein_coding	Hsp70Bc
FBgn0013303	0.310355	0.0150267	0.0543089	protein_coding	Nca
FBgn0013305	0.20327	0.112963	0.242744	protein_coding	Nmda1
FBgn0013307	-0.695534	0.058176	0.149137	protein_coding	Odc1
FBgn0013323	-1.59097	2.20111e-05	0.000265583	protein_coding	Ptth
FBgn0013325	-0.503793	4.34419e-06	6.53307e-05	protein_coding	RpL11
FBgn0013334	-0.27707	0.00199189	0.0110971	protein_coding	Sap47
FBgn0013342	0.341358	0.168247	0.321969	protein_coding	nSyb
FBgn0013343	-0.011701	0.923819	0.959149	protein_coding	Syx1A
FBgn0013347	0.024239	0.810794	0.890433	protein_coding	TfIIA-S
FBgn0013432	0.594405	8.88531e-05	0.000884082	protein_coding	bcn92
FBgn0013435	0.343627	0.125412	0.262488	protein_coding	Cdc2rk
FBgn0013467	0.610593	0.0938253	0.211687	protein_coding	igl
FBgn0013469	0.00564313	0.978307	0.990321	protein_coding	klu
FBgn0013531	0.345939	0.0962177	0.215538	protein_coding	MED20
FBgn0013548	0.157415	0.512242	0.674825	protein_coding	l(2)dtl
FBgn0013563	0.16446	0.166043	0.319134	protein_coding	Pex1
FBgn0013576	-0.163488	0.0606828	0.153573	protein_coding	mtd
FBgn0013672	0.13475	0.409788	0.584722	protein_coding	mt:ATPase6
FBgn0013674	0.549131	1.38564e-07	3.34379e-06	protein_coding	mt:CoI
FBgn0013675	0.431352	0.0094897	0.0379222	protein_coding	mt:CoII
FBgn0013678	0.316117	0.0143749	0.0524405	protein_coding	mt:Cyt-b
FBgn0013679	0.0745284	0.675802	0.798597	protein_coding	mt:ND1
FBgn0013680	0.0778937	0.75883	0.856225	protein_coding	mt:ND2
FBgn0013681	-0.0296935	0.909995	0.951632	protein_coding	mt:ND3
FBgn0013683	-0.371907	0.237239	0.408626	protein_coding	mt:ND4L
FBgn0013684	0.141982	0.257107	0.431623	protein_coding	mt:ND5
FBgn0013685	0.00481681	0.988961	0.995356	protein_coding	mt:ND6
FBgn0013717	0.175702	0.274183	0.451462	protein_coding	not
FBgn0013718	-0.144599	0.31465	0.49445	protein_coding	nuf
FBgn0013720	0.0806282	0.644016	0.778975	protein_coding	pck
FBgn0013726	0.502902	1.28153e-07	3.15784e-06	protein_coding	pnut
FBgn0013732	-0.0688488	0.836532	0.907182	protein_coding	sced
FBgn0013733	-0.367196	4.81885e-05	0.000525739	protein_coding	shot
FBgn0013746	0.0289252	0.787864	0.874999	protein_coding	alien
FBgn0013749	0.795929	1.66673e-10	8.8441e-09	protein_coding	Arf102F
FBgn0013750	0.223597	0.0114285	0.0437422	protein_coding	Arf51F
FBgn0013753	-0.100495	0.756614	0.854564	protein_coding	Bgb
FBgn0013756	-0.239088	0.0152861	0.0550292	protein_coding	Mtor
FBgn0013759	-0.0569416	0.448107	0.61964	protein_coding	CASK
FBgn0013762	-0.000483433	0.99696	0.9991	protein_coding	Cdk5
FBgn0013763	-0.17065	0.668941	0.794309	protein_coding	Idgf6
FBgn0013764	-0.0976118	0.297179	0.475889	protein_coding	Chi
FBgn0013765	0.479682	0.00163037	0.00942788	protein_coding	cnn
FBgn0013770	0.351387	0.000225655	0.00192456	protein_coding	Cp1
FBgn0013771	-0.26051	0.190344	0.351308	protein_coding	Cyp6a9
FBgn0013772	0.21759	0.517077	0.678815	protein_coding	Cyp6a8
FBgn0013773	0.352906	0.306479	0.485778	protein_coding	Cyp6a22
FBgn0013799	-0.0728956	0.475456	0.643519	protein_coding	Deaf1
FBgn0013811	-0.545353	0.00904622	0.0365568	protein_coding	Dhc62B
FBgn0013949	-0.268906	0.446241	0.618131	protein_coding	Elal
FBgn0013953	-0.313206	0.391799	0.567816	protein_coding	Esp
FBgn0013954	0.116462	0.084144	0.195526	protein_coding	Fkbp12
FBgn0013972	-0.51615	0.122733	0.258678	protein_coding	Gycalpha99B
FBgn0013973	-0.350415	0.315249	0.495141	protein_coding	Gycbeta100B
FBgn0013981	-0.145052	0.112488	0.241946	protein_coding	His4r
FBgn0013983	-0.115543	0.331455	0.5119	protein_coding	imd
FBgn0013987	0.361261	0.000342765	0.00269452	protein_coding	MAPk-Ak2
FBgn0013995	-0.270162	0.0383186	0.109103	protein_coding	Calx
FBgn0013997	-0.229205	0.0387166	0.109905	protein_coding	Nrx-IV
FBgn0014000	-0.469531	0.193066	0.354929	protein_coding	Hf
FBgn0014002	-0.158932	0.10831	0.235508	NA	NA
FBgn0014006	-0.345915	0.00191404	0.0107294	protein_coding	Ask1
FBgn0014007	0.243484	0.106217	0.23231	protein_coding	Ptp69D
FBgn0014009	0.0876127	0.167747	0.321418	protein_coding	Rab2
FBgn0014010	0.198119	0.0273397	0.0859971	protein_coding	Rab5
FBgn0014011	-0.441785	4.13685e-05	0.000459929	protein_coding	Rac2
FBgn0014018	-0.223942	0.336989	0.517629	protein_coding	Rel
FBgn0014020	0.494113	2.03651e-05	0.00024992	protein_coding	Rho1
FBgn0014022	-0.422912	0.0581224	0.14904	protein_coding	Rlb1
FBgn0014023	0.132901	0.353076	0.53321	protein_coding	mRpL47
FBgn0014024	-0.138108	0.110074	0.238202	protein_coding	Rnp4F
FBgn0014026	-0.783539	1.15047e-09	5.19044e-08	protein_coding	RpL7A
FBgn0014028	-0.258439	0.00717212	0.0305479	protein_coding	SdhB
FBgn0014029	0.436131	1.90069e-05	0.000235107	protein_coding	Sep2
FBgn0014031	0.472633	0.165411	0.318051	protein_coding	Spat
FBgn0014032	0.000435761	0.99667	0.999024	protein_coding	Sptr
FBgn0014033	-0.553089	0.0715495	0.173424	protein_coding	Sr-CI
FBgn0014037	-0.0845587	0.315778	0.495454	protein_coding	Su(Tpl)
FBgn0014073	-1.30276	1.91317e-05	0.000236338	protein_coding	Tie
FBgn0014075	0.0722696	0.33441	0.514846	protein_coding	Uggt
FBgn0014092	-0.117251	0.391739	0.567816	protein_coding	CG4278
FBgn0014127	0.107781	0.601223	0.745165	protein_coding	barr
FBgn0014133	0.190831	0.0385976	0.109663	protein_coding	bif
FBgn0014135	-0.327766	0.131564	0.270514	protein_coding	bnl
FBgn0014141	-0.835499	0.000149923	0.001362	protein_coding	cher
FBgn0014143	0.00542559	0.986994	0.994382	protein_coding	croc
FBgn0014163	0.694264	0.000135564	0.00125102	protein_coding	fax
FBgn0014184	0.15105	0.206888	0.372413	protein_coding	Oda
FBgn0014189	-0.150061	0.161648	0.31281	protein_coding	Hel25E
FBgn0014269	-0.0432378	0.68882	0.80844	protein_coding	prod
FBgn0014340	-0.285532	0.301069	0.479809	protein_coding	mof
FBgn0014342	-1.26372	1.7407e-09	7.38928e-08	protein_coding	mia
FBgn0014343	-0.92436	0.000345663	0.0027059	protein_coding	mirr
FBgn0014366	-0.0671414	0.641907	0.777531	protein_coding	noi
FBgn0014380	0.200034	0.087672	0.201612	protein_coding	RhoL
FBgn0014388	0.22605	0.306584	0.485862	protein_coding	sty
FBgn0014391	-0.0079643	0.951869	0.974726	protein_coding	sun
FBgn0014395	-0.811104	0.000431997	0.0032641	protein_coding	tilB
FBgn0014396	-0.531347	0.000248949	0.00207584	protein_coding	tim
FBgn0014411	-0.0745071	0.428148	0.601908	protein_coding	Vps26
FBgn0014417	-0.192589	0.514654	0.676951	protein_coding	CG13397
FBgn0014427	-0.00365243	0.981005	0.991549	protein_coding	CG11899
FBgn0014455	-0.274463	0.0702922	0.17131	protein_coding	Ahcy
FBgn0014469	0.150876	0.556858	0.71016	protein_coding	Cyp4e2
FBgn0014857	0.143844	0.0749951	0.179631	protein_coding	His3.3A
FBgn0014859	-0.392686	0.269606	0.446427	protein_coding	Hr38
FBgn0014861	0.732209	9.82766e-05	0.000958043	protein_coding	Mcm2
FBgn0014863	0.846852	0.000209987	0.0018158	protein_coding	Mlp84B
FBgn0014865	1.31998	0.000110763	0.00105337	protein_coding	Mtk
FBgn0014868	0.232367	0.0164746	0.0583231	protein_coding	Ost48
FBgn0014869	-0.206661	0.0697826	0.170335	protein_coding	Pglym78
FBgn0014870	-0.204602	0.0198006	0.0672183	protein_coding	Psi
FBgn0014877	0.130178	0.273943	0.451208	protein_coding	Roe1
FBgn0014879	0.120978	0.273031	0.450502	protein_coding	Set
FBgn0014903	1.00804	1.84772e-19	5.5664e-17	protein_coding	CG14630
FBgn0014906	-0.0147781	0.897232	0.944566	protein_coding	Hydr2
FBgn0014930	0.0351325	0.777139	0.867333	protein_coding	CG2846
FBgn0014931	-0.429064	0.0550878	0.143146	protein_coding	CG2678
FBgn0015000	-0.0238346	0.798382	0.881786	protein_coding	betaggt-I
FBgn0015001	-0.811469	1.79422e-13	2.23416e-11	protein_coding	iotaTry
FBgn0015010	-0.247568	0.364093	0.543521	protein_coding	Ag5r
FBgn0015011	-0.0921075	0.730395	0.83726	protein_coding	AhcyL2
FBgn0015019	0.0982254	0.238298	0.409922	protein_coding	CCT3
FBgn0015024	0.0207159	0.772488	0.864283	protein_coding	CkIalpha
FBgn0015025	-0.131005	0.675611	0.798473	protein_coding	CkIIalpha-i1
FBgn0015031	-0.00920476	0.954016	0.975855	protein_coding	cype
FBgn0015033	-0.0384043	0.853016	0.918413	protein_coding	Cyp4d8
FBgn0015034	-0.268616	0.356916	0.53658	protein_coding	Cyp4e1
FBgn0015035	-0.14158	0.708119	0.821506	protein_coding	Cyp4e3
FBgn0015036	-0.0866726	0.388097	0.565082	protein_coding	Cyp4ae1
FBgn0015037	-0.142097	0.504188	0.668173	protein_coding	Cyp4p1
FBgn0015038	-0.256149	0.183091	0.341635	protein_coding	Cyp9b1
FBgn0015039	1.63925	3.89655e-24	2.14058e-21	protein_coding	Cyp9b2
FBgn0015040	-0.472752	0.00502683	0.0229562	protein_coding	Cyp9c1
FBgn0015075	0.160887	0.197866	0.360771	protein_coding	Ddx1
FBgn0015218	-0.0278105	0.642302	0.777752	protein_coding	eIF4E1
FBgn0015221	0.297867	0.0241944	0.078265	protein_coding	Fer2LCH
FBgn0015222	0.295272	0.0145003	0.0527125	protein_coding	Fer1HCH
FBgn0015229	0.0838291	0.57969	0.728434	protein_coding	glec
FBgn0015239	-0.217044	0.0462894	0.125376	protein_coding	Hr78
FBgn0015240	0.812306	6.49163e-08	1.72759e-06	protein_coding	Hr96
FBgn0015245	0.108451	0.29187	0.470285	protein_coding	Hsp60A
FBgn0015247	-0.130709	0.102256	0.225547	protein_coding	Diap2
FBgn0015268	-0.846122	5.03987e-14	6.82135e-12	protein_coding	Nap1
FBgn0015269	-0.334662	0.00286	0.0147435	protein_coding	Nf1
FBgn0015270	1.02161	0.000850401	0.00562059	protein_coding	Orc2
FBgn0015271	0.387008	0.216805	0.384713	protein_coding	Orc5
FBgn0015277	-0.0469077	0.606912	0.74973	protein_coding	Pi3K59F
FBgn0015278	0.0138594	0.851804	0.917743	protein_coding	Pi3K68D
FBgn0015279	-0.016897	0.868015	0.92708	protein_coding	Pi3K92E
FBgn0015282	0.101718	0.243571	0.41592	protein_coding	Rpt2
FBgn0015283	0.0524553	0.572472	0.723031	protein_coding	Rpn10
FBgn0015286	0.663967	1.87933e-08	5.68037e-07	protein_coding	Rala
FBgn0015288	-0.933919	1.89506e-09	7.86578e-08	protein_coding	RpL22
FBgn0015295	0.0631996	0.522651	0.683882	protein_coding	Shark
FBgn0015296	0.568354	2.32297e-07	5.21625e-06	protein_coding	Shc
FBgn0015298	-0.214208	0.115872	0.247401	protein_coding	Srp19
FBgn0015299	0.436041	0.00204183	0.0113033	protein_coding	Ssb-c31a
FBgn0015316	-1.27535	0.00197402	0.0110294	protein_coding	Try29F
FBgn0015320	0.386582	0.000961176	0.00622067	protein_coding	Ubc2
FBgn0015321	0.0457377	0.580008	0.728561	protein_coding	Ubc4
FBgn0015331	0.0522144	0.744359	0.84693	protein_coding	abs
FBgn0015336	0.427794	0.00485949	0.0223899	protein_coding	CG15865
FBgn0015338	0.170761	0.166861	0.320114	protein_coding	CG5861
FBgn0015351	1.11916	1.84442e-07	4.31705e-06	protein_coding	CG14906
FBgn0015359	0.0112972	0.939934	0.967502	protein_coding	CG2034
FBgn0015360	0.0770985	0.496806	0.662126	protein_coding	oxt
FBgn0015371	0.340566	0.0858539	0.198463	protein_coding	chn
FBgn0015372	0.708044	4.29894e-08	1.19487e-06	protein_coding	RabX1
FBgn0015376	0.871556	5.75556e-05	0.000614299	protein_coding	cutlet
FBgn0015379	0.0135895	0.90742	0.950897	protein_coding	dod
FBgn0015380	-1.32219	1.87017e-07	4.35549e-06	protein_coding	drl
FBgn0015391	0.209583	0.254438	0.42853	protein_coding	glu
FBgn0015393	-0.25228	0.0313745	0.0942446	NA	NA
FBgn0015396	0.19787	0.483405	0.650733	protein_coding	jumu
FBgn0015399	0.651474	0.0422531	0.117092	protein_coding	kek1
FBgn0015400	0.421788	0.240003	0.411868	protein_coding	kek2
FBgn0015402	-0.117786	0.430798	0.60445	protein_coding	ksr
FBgn0015477	0.252812	0.00404654	0.0193465	protein_coding	Rme-8
FBgn0015509	0.3757	7.09523e-05	0.000730566	protein_coding	Cul1
FBgn0015513	-0.512535	3.12968e-07	6.71984e-06	protein_coding	mbc
FBgn0015519	-1.09799	0.00218007	0.0119481	protein_coding	nAChRalpha3
FBgn0015520	0.0164314	0.948022	0.972451	protein_coding	nonA-l
FBgn0015521	-0.445043	0.000589119	0.00420122	protein_coding	RpS21
FBgn0015522	-0.551539	0.0407988	0.114489	protein_coding	olf186-M
FBgn0015524	-0.27938	0.438205	0.611261	protein_coding	otp
FBgn0015527	-0.464765	0.00159424	0.00925331	protein_coding	peng
FBgn0015544	-0.838595	6.02655e-05	0.000638841	protein_coding	spag
FBgn0015546	0.326164	0.125598	0.262759	protein_coding	spel1
FBgn0015550	0.304343	0.222511	0.391876	protein_coding	tap
FBgn0015553	-0.330269	0.253088	0.427258	protein_coding	tos
FBgn0015568	-0.396624	0.0227072	0.0746601	protein_coding	alpha-Est1
FBgn0015569	0.15828	0.502985	0.667318	protein_coding	alpha-Est10
FBgn0015570	-0.673878	0.0358756	0.104212	protein_coding	alpha-Est2
FBgn0015571	0.1409	0.311589	0.491294	protein_coding	alpha-Est3
FBgn0015572	-0.139002	0.51924	0.681066	protein_coding	alpha-Est4
FBgn0015574	0.246298	0.343221	0.523035	protein_coding	alpha-Est6
FBgn0015575	-1.96392	1.12037e-11	8.04853e-10	protein_coding	alpha-Est7
FBgn0015576	0.527906	0.00255772	0.0135587	protein_coding	alpha-Est8
FBgn0015577	0.278429	0.088873	0.203117	protein_coding	alpha-Est9
FBgn0015582	-0.0316389	0.804432	0.885838	protein_coding	dare
FBgn0015589	0.037129	0.794298	0.879529	protein_coding	Apc
FBgn0015591	0.768054	6.51714e-07	1.28676e-05	protein_coding	AstA
FBgn0015600	-0.466379	0.00020153	0.00175896	protein_coding	toc
FBgn0015602	0.0318	0.788342	0.875113	protein_coding	BEAF-32
FBgn0015609	-0.0547724	0.876685	0.932942	protein_coding	CadN
FBgn0015614	0.185291	0.0769763	0.183388	protein_coding	CanB2
FBgn0015615	-0.187231	0.158773	0.308912	protein_coding	SMC3
FBgn0015618	0.423693	0.0181661	0.0629128	protein_coding	Cdk8
FBgn0015621	-0.0734211	0.655188	0.784788	protein_coding	Clp
FBgn0015622	0.174866	0.108738	0.236079	protein_coding	Cnx99A
FBgn0015623	0.149721	0.320217	0.499417	protein_coding	Cpr
FBgn0015625	0.471737	0.164953	0.317431	protein_coding	CycB3
FBgn0015663	-0.27571	0.0999834	0.221387	protein_coding	Ugt36A1
FBgn0015664	-0.084332	0.416455	0.590806	protein_coding	Dref
FBgn0015714	-0.198925	0.423943	0.598142	protein_coding	Cyp6a17
FBgn0015721	-0.237415	0.411194	0.585768	protein_coding	ktub
FBgn0015737	-0.0099857	0.880542	0.935255	protein_coding	Hmu
FBgn0015754	0.185709	0.0559454	0.144922	protein_coding	Lis-1
FBgn0015756	-0.770123	1.34565e-09	5.92786e-08	protein_coding	RpL9
FBgn0015765	0.376666	0.00280497	0.0145693	protein_coding	p38a
FBgn0015766	-0.530751	0.150567	0.296807	protein_coding	Msr-110
FBgn0015772	0.047872	0.572799	0.723084	protein_coding	Nak
FBgn0015773	0.718781	0.00295107	0.0151262	protein_coding	NetA
FBgn0015774	-0.244633	0.353346	0.533379	protein_coding	NetB
FBgn0015776	0.047931	0.786251	0.874455	protein_coding	nrv1
FBgn0015777	-0.441868	0.104987	0.230196	protein_coding	nrv2
FBgn0015778	-0.067791	0.427991	0.601777	protein_coding	rin
FBgn0015781	0.0409659	0.749198	0.849946	protein_coding	P5cr
FBgn0015789	0.283885	0.0061979	0.02713	protein_coding	Rab10
FBgn0015790	0.154967	0.125896	0.263148	protein_coding	Rab11
FBgn0015791	0.417744	0.0238103	0.0773712	protein_coding	Rab14
FBgn0015793	0.185617	0.144109	0.288188	protein_coding	Rab19
FBgn0015794	0.320607	0.0073724	0.0311683	protein_coding	Rab18
FBgn0015795	-0.113165	0.242523	0.414896	protein_coding	Rab7
FBgn0015797	0.175816	0.0187153	0.0642819	protein_coding	Rab6
FBgn0015799	0.0461982	0.750961	0.850828	protein_coding	Rbf
FBgn0015801	-1.07323	0.000148723	0.00135373	protein_coding	Reg-5
FBgn0015803	0.134834	0.158158	0.308037	protein_coding	RtGEF
FBgn0015805	0.250266	0.00642449	0.0279322	protein_coding	HDAC1
FBgn0015808	0.416372	0.0227111	0.0746601	protein_coding	ScpX
FBgn0015818	-0.156873	0.3057	0.485367	protein_coding	Spx
FBgn0015828	0.145011	0.250196	0.423831	protein_coding	TfIIEalpha
FBgn0015829	0.365609	0.0225342	0.0742317	protein_coding	TfIIEbeta
FBgn0015834	-0.528513	1.15999e-06	2.0793e-05	protein_coding	eIF3i
FBgn0015838	0.0440603	0.812074	0.890973	protein_coding	Vang
FBgn0015872	-0.419269	0.0212153	0.0708871	protein_coding	Drip
FBgn0015903	-0.0626209	0.561334	0.714307	protein_coding	apt
FBgn0015904	-0.589722	0.108308	0.235508	protein_coding	ara
FBgn0015905	-0.461724	0.00047855	0.00353016	protein_coding	ast
FBgn0015919	-0.928994	0.00500981	0.0229009	protein_coding	caup
FBgn0015924	0.251299	0.0139126	0.0511737	protein_coding	crq
FBgn0015925	0.387703	0.0442257	0.12104	protein_coding	csul
FBgn0015929	0.710588	0.000305287	0.00244518	protein_coding	dpa
FBgn0015949	-0.275801	0.000491498	0.00361425	protein_coding	hrg
FBgn0016013	0.690402	0.046674	0.126198	protein_coding	Faa
FBgn0016031	0.423986	0.0329046	0.0975852	protein_coding	lama
FBgn0016032	0.676101	0.00305571	0.0155432	protein_coding	lbm
FBgn0016034	1.20985	0.00028608	0.00232322	protein_coding	mael
FBgn0016038	0.154782	0.194586	0.356951	protein_coding	Vsp37A
FBgn0016041	-0.332717	0.00158493	0.00921784	protein_coding	Tom40
FBgn0016053	-0.0411462	0.788235	0.875098	protein_coding	pgc
FBgn0016054	-0.0770362	0.78691	0.874667	protein_coding	phr6-4
FBgn0016059	0.440558	0.0100475	0.0395756	protein_coding	Sema1b
FBgn0016061	0.758351	0.0177257	0.0618133	protein_coding	side
FBgn0016070	-0.165476	0.149228	0.2952	protein_coding	smg
FBgn0016075	-0.0710463	0.789291	0.875667	protein_coding	vkg
FBgn0016076	-0.367244	0.00944223	0.037781	protein_coding	vri
FBgn0016078	-0.345337	0.000304204	0.00243927	protein_coding	wun
FBgn0016080	-0.183567	0.608591	0.750909	NA	NA
FBgn0016081	0.490395	8.07518e-06	0.000112057	protein_coding	fry
FBgn0016119	-0.17675	0.0750475	0.17971	protein_coding	ATPsynCF6
FBgn0016120	-0.350237	0.00346949	0.0171873	protein_coding	ATPsynD
FBgn0016122	-0.0861291	0.733754	0.838846	protein_coding	Acer
FBgn0016123	0.00299005	0.992781	0.997802	protein_coding	Alp4
FBgn0016126	0.634588	2.46638e-07	5.48469e-06	protein_coding	CaMKI
FBgn0016131	-0.420448	0.0431534	0.118707	protein_coding	Cdk4
FBgn0016641	-0.157789	0.355817	0.535422	protein_coding	PTP-ER
FBgn0016650	-0.119259	0.748002	0.849105	protein_coding	Lgr1
FBgn0016672	-0.117662	0.290748	0.468802	protein_coding	Ipp
FBgn0016684	0.358213	0.19824	0.361171	protein_coding	NaPi-T
FBgn0016685	-0.362451	0.00636848	0.0278065	protein_coding	Nlp
FBgn0016687	-0.351731	0.00146128	0.00868675	protein_coding	Nurf-38
FBgn0016691	0.0289751	0.768108	0.86208	protein_coding	ATPsynO
FBgn0016693	0.377792	6.41857e-06	9.08228e-05	protein_coding	Past1
FBgn0016694	-0.335532	0.0108023	0.0418601	protein_coding	Pdp1
FBgn0016696	-0.288472	0.00975604	0.0388039	protein_coding	Pitslre
FBgn0016697	0.543485	8.87962e-05	0.000884082	protein_coding	Prosalpha5
FBgn0016698	0.272382	0.09236	0.208749	protein_coding	Ptpa
FBgn0016701	0.0801923	0.505224	0.668848	protein_coding	Rab4
FBgn0016715	-0.424596	0.00874417	0.0355601	protein_coding	Reg-2
FBgn0016726	-0.390723	0.00400735	0.0192514	protein_coding	RpL29
FBgn0016754	-0.113667	0.363879	0.543287	protein_coding	sba
FBgn0016756	-0.406206	0.00124991	0.00768462	protein_coding	Usp47
FBgn0016762	0.202576	0.269746	0.446502	protein_coding	angel
FBgn0016794	0.0288353	0.845944	0.913665	protein_coding	dos
FBgn0016797	-0.163448	0.205779	0.370983	protein_coding	fz2
FBgn0016917	0.126916	0.0864884	0.199485	protein_coding	Stat92E
FBgn0016920	-0.720387	0.0601285	0.152593	protein_coding	nompC
FBgn0016926	0.162047	0.259133	0.433933	protein_coding	Pino
FBgn0016930	0.10284	0.551117	0.705632	protein_coding	Dyrk2
FBgn0016970	-0.0921673	0.728003	0.835543	protein_coding	l(2)k10201
FBgn0016975	0.727909	0.00175269	0.0100162	protein_coding	stnB
FBgn0016976	0.727909	0.00175269	0.0100162	protein_coding	stnA
FBgn0016977	-0.371157	0.00143075	0.00853789	protein_coding	spen
FBgn0016978	0.0118059	0.943726	0.970618	protein_coding	snRNP-U1-70K
FBgn0016983	-0.123741	0.193299	0.355289	protein_coding	smid
FBgn0016984	0.0952417	0.392149	0.56788	protein_coding	sktl
FBgn0017414	0.224786	0.397845	0.573776	protein_coding	cag
FBgn0017418	0.00922528	0.925569	0.960325	protein_coding	ari-1
FBgn0017424	-0.198602	0.49722	0.662315	ncRNA	asRNA:CR11538
FBgn0017429	-0.0731114	0.598258	0.742772	protein_coding	CG5989
FBgn0017430	0.0938873	0.680837	0.802647	protein_coding	Nelf-E
FBgn0017448	0.281664	0.259197	0.433963	protein_coding	CG2187
FBgn0017457	-0.135182	0.258658	0.43353	protein_coding	U2af38
FBgn0017482	-0.0999773	0.386192	0.563883	protein_coding	T3dh
FBgn0017545	-0.719061	3.40876e-08	9.70563e-07	protein_coding	RpS3A
FBgn0017550	-0.0472982	0.674879	0.798035	protein_coding	Rga
FBgn0017551	0.128146	0.638136	0.774699	protein_coding	Rca1
FBgn0017558	-0.439455	0.0845511	0.196033	protein_coding	Pdk
FBgn0017561	-0.780655	2.06549e-06	3.42622e-05	protein_coding	Ork1
FBgn0017566	-0.274597	0.007984	0.0330801	protein_coding	ND-75
FBgn0017567	-0.21098	0.0448265	0.122122	protein_coding	ND-23
FBgn0017572	0.0193866	0.754647	0.853477	protein_coding	Mo25
FBgn0017577	1.29965	5.39871e-07	1.08661e-05	protein_coding	Mcm5
FBgn0017578	-0.510981	6.33329e-06	8.9752e-05	protein_coding	Max
FBgn0017579	-0.537773	4.99487e-06	7.35758e-05	protein_coding	RpL14
FBgn0017581	-0.484746	0.000442677	0.00331529	protein_coding	Lk6
FBgn0017590	1.36604	0.00016574	0.00148975	protein_coding	klg
FBgn0019624	-0.0498624	0.580137	0.728604	protein_coding	COX5A
FBgn0019637	-0.209634	0.076931	0.183327	protein_coding	Atu
FBgn0019643	-0.203446	0.146641	0.291378	protein_coding	AANAT1
FBgn0019644	-0.182034	0.106688	0.233121	protein_coding	ATPsynB
FBgn0019662	0.611336	4.06453e-07	8.47292e-06	protein_coding	qm
FBgn0019686	-0.266672	0.14606	0.29072	protein_coding	lok
FBgn0019830	-0.58121	0.000235203	0.00197723	protein_coding	colt
FBgn0019890	-0.216146	0.0829914	0.194104	protein_coding	Smg5
FBgn0019925	-0.290308	0.0352876	0.102888	protein_coding	Surf4
FBgn0019928	1.90548	9.47141e-11	5.38102e-09	protein_coding	Ser8
FBgn0019929	-0.366984	0.315867	0.495454	protein_coding	Ser7
FBgn0019932	0.241521	0.061058	0.154072	protein_coding	SamDC
FBgn0019936	-0.615789	4.38586e-08	1.21542e-06	protein_coding	RpS20
FBgn0019938	-0.545899	0.000196086	0.00171465	protein_coding	RpI1
FBgn0019949	0.205102	0.190573	0.351522	protein_coding	Cdk9
FBgn0019952	0.755437	0.00115413	0.00720965	protein_coding	Orct
FBgn0019957	-0.148943	0.226125	0.396535	protein_coding	ND-42
FBgn0019960	-0.0420017	0.664142	0.791558	protein_coding	Mitofilin
FBgn0019968	-0.0926567	0.410143	0.584908	protein_coding	Khc-73
FBgn0019972	-0.0347616	0.839197	0.909401	protein_coding	Drice
FBgn0019982	0.206926	0.0653643	0.161979	protein_coding	Gs1l
FBgn0019990	-0.343661	0.0539	0.140764	protein_coding	Gcn2
FBgn0020018	-0.168388	0.187778	0.347327	protein_coding	Ppox
FBgn0020224	-0.163831	0.146117	0.29077	protein_coding	Cbl
FBgn0020235	-0.0510298	0.628272	0.767012	protein_coding	ATPsyngamma
FBgn0020236	0.107602	0.543388	0.69931	protein_coding	ATPCL
FBgn0020238	0.20698	0.0289954	0.0896056	protein_coding	14-3-3epsilon
FBgn0020249	0.0588785	0.502502	0.66717	protein_coding	stck
FBgn0020251	0.123059	0.35488	0.534466	protein_coding	sfl
FBgn0020255	-0.0347549	0.607895	0.750348	protein_coding	Ran
FBgn0020257	0.431247	3.68849e-05	0.000417031	protein_coding	Ppa
FBgn0020258	-0.129792	0.715633	0.827448	protein_coding	ppk
FBgn0020261	-0.171609	0.0682671	0.167414	protein_coding	pcm
FBgn0020270	-0.342755	0.0109524	0.0423713	protein_coding	mre11
FBgn0020272	0.707379	0.000736373	0.0050197	protein_coding	mst
FBgn0020278	0.432815	0.00278688	0.0144947	protein_coding	loco
FBgn0020279	-0.0645651	0.27579	0.453291	protein_coding	lig
FBgn0020294	-0.476596	0.0728428	0.17551	protein_coding	ko
FBgn0020299	0.25218	0.32854	0.508575	protein_coding	stumps
FBgn0020300	-0.254725	0.407481	0.582944	protein_coding	geko
FBgn0020304	-0.0902092	0.498721	0.66347	protein_coding	drongo
FBgn0020305	-0.17704	0.286003	0.463594	protein_coding	dbe
FBgn0020306	-0.738704	6.36079e-12	5.03419e-10	protein_coding	dom
FBgn0020307	-0.732872	3.64071e-05	0.00041313	protein_coding	dve
FBgn0020309	-0.0612695	0.400464	0.576172	protein_coding	crol
FBgn0020312	0.106846	0.617963	0.759263	protein_coding	Tmtc3
FBgn0020369	0.348896	0.000421339	0.00319131	protein_coding	Rpt6
FBgn0020370	-0.0515123	0.483925	0.651005	protein_coding	TppII
FBgn0020379	-0.302492	0.0878502	0.201779	protein_coding	Rfx
FBgn0020381	-0.119644	0.250709	0.424449	protein_coding	Dredd
FBgn0020385	-0.479184	9.86779e-05	0.000959951	protein_coding	pug
FBgn0020386	-0.225212	0.161372	0.3126	protein_coding	Pdk1
FBgn0020388	0.507546	0.00314926	0.0158978	protein_coding	Gcn5
FBgn0020389	0.278191	0.00836628	0.0343881	protein_coding	Papss
FBgn0020391	0.170436	0.577094	0.726052	protein_coding	Nrk
FBgn0020392	0.0422151	0.643122	0.778498	protein_coding	Nmt
FBgn0020407	0.239722	0.121894	0.257374	protein_coding	asun
FBgn0020412	-0.293633	0.000898669	0.00588959	protein_coding	JIL-1
FBgn0020414	-0.352695	0.272035	0.449413	protein_coding	Idgf3
FBgn0020415	-0.570156	0.0839361	0.195192	protein_coding	Idgf2
FBgn0020416	-0.688381	0.0571241	0.147167	protein_coding	Idgf1
FBgn0020440	-0.137698	0.168891	0.322882	protein_coding	Fak
FBgn0020443	-0.157363	0.016663	0.0589232	protein_coding	eRF3
FBgn0020445	0.0649148	0.751825	0.851304	protein_coding	E23
FBgn0020493	-0.100348	0.352969	0.533155	protein_coding	Dad
FBgn0020496	0.151673	0.0657694	0.162751	protein_coding	CtBP
FBgn0020497	-0.184346	0.00706618	0.0301743	protein_coding	emb
FBgn0020503	-0.239142	0.0167609	0.0591348	protein_coding	CLIP-190
FBgn0020506	1.09678	2.27196e-08	6.75728e-07	protein_coding	Amyrel
FBgn0020508	1.03401	6.70627e-07	1.31852e-05	protein_coding	Ag5r2
FBgn0020510	0.263836	0.0179022	0.0623094	protein_coding	Abi
FBgn0020513	-0.731012	0.00119127	0.00740204	protein_coding	Paics
FBgn0020521	-0.179801	0.324986	0.504831	protein_coding	pio
FBgn0020545	-0.00971592	0.944551	0.97064	protein_coding	kraken
FBgn0020616	-0.0626003	0.509262	0.672036	protein_coding	SA
FBgn0020618	-0.893793	2.90666e-11	1.9252e-09	protein_coding	Rack1
FBgn0020620	0.0769414	0.388444	0.565499	protein_coding	RN-tre
FBgn0020621	0.0544564	0.610576	0.752861	protein_coding	Pkn
FBgn0020622	1.02756	9.46934e-07	1.76515e-05	protein_coding	Pi3K21B
FBgn0020626	0.328311	0.000470841	0.0034926	protein_coding	Osbp
FBgn0020633	1.00913	0.000595807	0.00423137	protein_coding	Mcm7
FBgn0020647	-0.0742342	0.69607	0.814305	protein_coding	KrT95D
FBgn0020653	0.12709	0.300263	0.479179	protein_coding	Trxr-1
FBgn0020655	0.0465522	0.612552	0.754302	protein_coding	ArfGAP1
FBgn0020660	-0.113861	0.0952585	0.214014	protein_coding	eIF4B
FBgn0020762	0.633543	0.00656571	0.0283527	protein_coding	Atet
FBgn0020764	0.242718	0.132179	0.271479	protein_coding	Alas
FBgn0020767	0.316678	0.0125101	0.0468075	protein_coding	Spred
FBgn0020880	-0.408332	0.282951	0.461327	protein_coding	CG7179
FBgn0020887	0.131538	0.359336	0.539091	protein_coding	Su(z)12
FBgn0020906	0.484183	0.0284238	0.0883963	protein_coding	Jon25Bi
FBgn0020907	0.644583	0.0117745	0.0447364	protein_coding	Scp2
FBgn0020908	-0.97886	0.00203103	0.0112569	protein_coding	Scp1
FBgn0020909	-0.00996408	0.958132	0.978564	protein_coding	Rtc1
FBgn0020910	-0.9054	6.21057e-09	2.21376e-07	protein_coding	RpL3
FBgn0020912	-0.361441	1.23394e-08	3.96007e-07	protein_coding	Ptx1
FBgn0020930	-0.0250735	0.864973	0.925737	protein_coding	Dgkepsilon
FBgn0021750	-0.32532	0.0423753	0.11726	protein_coding	SerRS-m
FBgn0021760	-0.204935	0.0281795	0.0878398	protein_coding	chb
FBgn0021761	-0.397539	5.96764e-05	0.000633316	protein_coding	Nup154
FBgn0021764	0.789677	7.21746e-13	7.57347e-11	protein_coding	sdk
FBgn0021765	0.317946	0.0309011	0.0931521	protein_coding	scu
FBgn0021767	0.0348837	0.89307	0.941611	protein_coding	org-1
FBgn0021768	0.0179723	0.838319	0.908665	protein_coding	nudC
FBgn0021776	-0.832728	0.000648026	0.00453139	protein_coding	mira
FBgn0021795	-0.234103	0.0739808	0.177611	protein_coding	Tapdelta
FBgn0021796	-0.0912704	0.391453	0.567816	protein_coding	Tor
FBgn0021800	-0.342045	0.0843017	0.195703	protein_coding	Reph
FBgn0021814	0.322104	0.0011517	0.00720891	protein_coding	Vps28
FBgn0021825	0.278456	0.0172737	0.0606234	protein_coding	DCTN2-p50
FBgn0021847	-0.0341217	0.720751	0.83087	protein_coding	Ttc7
FBgn0021856	-0.0881158	0.503043	0.667318	protein_coding	l(2)k14505
FBgn0021872	-0.294666	0.0110126	0.0425514	protein_coding	Xbp1
FBgn0021874	-0.320015	0.0428813	0.118097	protein_coding	Nle
FBgn0021875	-0.276279	0.0954469	0.214109	protein_coding	Zfrp8
FBgn0021895	-0.195245	0.044328	0.121206	protein_coding	ytr
FBgn0021906	-0.153559	0.200341	0.363834	protein_coding	RFeSP
FBgn0021944	-0.51855	3.76886e-06	5.78905e-05	protein_coding	Coprox
FBgn0021967	-0.253309	0.00560825	0.0251327	protein_coding	ND-PDSW
FBgn0021979	0.0238786	0.739442	0.843316	protein_coding	l(2)k09913
FBgn0021995	-0.482368	7.21267e-06	0.000101444	protein_coding	Rs1
FBgn0022023	-0.746036	1.25395e-11	8.80499e-10	protein_coding	eIF3h
FBgn0022027	0.592462	0.000344932	0.00270245	protein_coding	Vps25
FBgn0022029	-0.51143	8.14435e-05	0.000824946	protein_coding	l(2)k01209
FBgn0022069	-0.482188	0.000224985	0.00192236	protein_coding	Nnp-1
FBgn0022097	0.053683	0.532853	0.690963	protein_coding	Vha36-1
FBgn0022153	0.060489	0.527958	0.687	protein_coding	l(2)k05819
FBgn0022160	-0.398346	0.0323991	0.0964229	protein_coding	Gpo1
FBgn0022213	-0.0674691	0.493932	0.659887	protein_coding	Cse1
FBgn0022224	0.414861	0.0270396	0.0852831	protein_coding	ubl
FBgn0022238	-0.199153	0.0198843	0.0674289	protein_coding	lolal
FBgn0022288	-0.488692	0.000222381	0.00190359	protein_coding	l(2)09851
FBgn0022338	1.15048	7.29715e-11	4.25925e-09	protein_coding	dnk
FBgn0022343	-0.294929	0.0032238	0.0162154	protein_coding	CG3760
FBgn0022344	-0.132248	0.221167	0.390155	protein_coding	CG10340
FBgn0022349	-0.215374	0.017342	0.0607975	protein_coding	CG1910
FBgn0022355	0.972054	0.00306665	0.0155818	protein_coding	Tsf1
FBgn0022359	0.41842	0.158638	0.308719	protein_coding	Sodh-2
FBgn0022361	0.548325	1.73449e-06	2.93449e-05	protein_coding	Pur-alpha
FBgn0022382	0.107319	0.170866	0.325524	protein_coding	Pka-R2
FBgn0022699	-0.466352	0.0036461	0.0178786	protein_coding	D19B
FBgn0022700	0.316822	0.391081	0.567392	protein_coding	Cht4
FBgn0022702	-0.0600529	0.827333	0.900918	protein_coding	Cht2
FBgn0022709	0.0938928	0.711425	0.824103	protein_coding	Adk1
FBgn0022710	-0.392902	0.0169786	0.05979	protein_coding	Ac13E
FBgn0022724	-0.188942	0.37159	0.550436	protein_coding	Taf8
FBgn0022740	0.632642	0.0877748	0.201705	protein_coding	HLH54F
FBgn0022764	-0.438581	2.57948e-06	4.13914e-05	protein_coding	Sin3A
FBgn0022768	-0.132125	0.341397	0.521386	protein_coding	Pp2C1
FBgn0022770	-0.813827	0.00708415	0.0302372	protein_coding	Peritrophin-A
FBgn0022772	0.671283	0.0143411	0.0523786	NA	NA
FBgn0022774	0.928754	0.000170565	0.0015214	protein_coding	Oat
FBgn0022786	-0.202774	0.184601	0.343356	protein_coding	Hira
FBgn0022787	0.137366	0.318033	0.497481	protein_coding	Hel89B
FBgn0022800	-0.73252	0.0286449	0.0889219	protein_coding	Cad96Ca
FBgn0022893	0.52022	0.00119505	0.00741566	protein_coding	Df31
FBgn0022935	-0.566974	8.48837e-05	0.000851912	protein_coding	D19A
FBgn0022936	0.401905	0.0316449	0.0947964	protein_coding	CycH
FBgn0022942	-0.0303037	0.7634	0.859233	protein_coding	Cbp80
FBgn0022943	0.126125	0.381006	0.558292	protein_coding	Cbp20
FBgn0022959	-0.445226	1.84508e-05	0.000229138	protein_coding	yps
FBgn0022960	0.273093	0.0288688	0.0893621	protein_coding	vimar
FBgn0022984	-0.151157	0.106362	0.232573	protein_coding	qkr58E-3
FBgn0022985	-0.0278707	0.755943	0.854148	protein_coding	qkr58E-2
FBgn0022986	-0.0960449	0.467691	0.636887	protein_coding	qkr58E-1
FBgn0022987	-0.0157079	0.916738	0.955392	protein_coding	qkr54B
FBgn0023000	-0.0788956	0.652786	0.783092	protein_coding	mth
FBgn0023001	0.181382	0.233441	0.404772	protein_coding	melt
FBgn0023023	-0.3873	0.0581993	0.149156	protein_coding	CRMP
FBgn0023076	-0.203067	0.250355	0.424024	protein_coding	Clk
FBgn0023081	0.0494756	0.636549	0.773655	protein_coding	gek
FBgn0023083	-0.19041	0.334225	0.51473	protein_coding	fray
FBgn0023091	-0.276299	0.379379	0.557167	protein_coding	dimm
FBgn0023094	0.141711	0.124765	0.26131	protein_coding	cyc
FBgn0023095	0.189003	0.0366042	0.105541	protein_coding	caps
FBgn0023097	-0.114274	0.25652	0.430871	protein_coding	bon
FBgn0023129	-0.24075	0.37856	0.556828	protein_coding	aay
FBgn0023130	0.146533	0.378554	0.556828	protein_coding	a6
FBgn0023143	0.131594	0.0428055	0.117993	protein_coding	Uba1
FBgn0023167	-0.0178127	0.883997	0.93702	protein_coding	SmD3
FBgn0023169	-0.2838	0.000151093	0.00137129	protein_coding	AMPKalpha
FBgn0023170	-0.296696	0.0140402	0.0514807	protein_coding	RpL39
FBgn0023171	-0.457268	0.00404726	0.0193465	protein_coding	rnh1
FBgn0023172	-0.031062	0.727781	0.835392	protein_coding	RhoGEF2
FBgn0023174	0.0468025	0.643347	0.778511	protein_coding	Prosbeta2
FBgn0023175	0.19633	0.0731929	0.176127	protein_coding	Prosalpha7
FBgn0023177	0.345819	7.25173e-05	0.000745858	protein_coding	Pp4-19C
FBgn0023179	-0.203409	0.312504	0.492403	protein_coding	amon
FBgn0023180	0.637237	0.0126919	0.0474307	protein_coding	Orc6
FBgn0023181	0.28286	0.180149	0.338445	protein_coding	Orc4
FBgn0023197	-0.902134	0.00498746	0.02281	protein_coding	Jon74E
FBgn0023212	-0.370691	0.000269635	0.00221082	protein_coding	EloB
FBgn0023213	-0.131645	0.105649	0.231284	protein_coding	eIF4G1
FBgn0023214	0.873218	5.85179e-05	0.000622436	protein_coding	edl
FBgn0023215	-0.0868273	0.475661	0.643704	protein_coding	Mnt
FBgn0023216	0.0688309	0.658986	0.787508	protein_coding	Parg
FBgn0023388	-0.2262	0.0135456	0.0500602	protein_coding	Dap160
FBgn0023395	0.593387	0.0732598	0.176243	protein_coding	Chd3
FBgn0023407	0.133804	0.493695	0.659744	protein_coding	B4
FBgn0023441	-0.251521	0.0133538	0.0495277	protein_coding	fus
FBgn0023458	0.232742	0.00687027	0.0294589	protein_coding	Rbcn-3A
FBgn0023477	-0.145573	0.168288	0.321969	protein_coding	Taldo
FBgn0023479	-0.38643	0.282338	0.46089	protein_coding	teq
FBgn0023495	2.24496	9.16289e-13	9.50803e-11	protein_coding	Lip3
FBgn0023506	0.0446359	0.784528	0.872954	protein_coding	Es2
FBgn0023507	-0.184615	0.349185	0.529562	protein_coding	D2hgdh
FBgn0023508	0.100908	0.254877	0.42896	protein_coding	Ocrl
FBgn0023509	-0.355195	0.00586981	0.0259931	protein_coding	mip130
FBgn0023510	-0.0102919	0.878161	0.934105	protein_coding	Rbcn-3B
FBgn0023511	-0.0822251	0.449084	0.620421	protein_coding	Edem1
FBgn0023512	0.00287629	0.983011	0.992506	protein_coding	eIF2Bepsilon
FBgn0023513	-0.0168253	0.944153	0.97064	protein_coding	CG14803
FBgn0023514	-0.129239	0.329252	0.509172	protein_coding	CG14805
FBgn0023515	0.208916	0.369804	0.5487	protein_coding	CG14814
FBgn0023516	-0.165966	0.253924	0.428239	protein_coding	Pex5
FBgn0023517	0.217308	0.107865	0.235089	protein_coding	Pgam5
FBgn0023518	-0.226512	0.0403974	0.113499	protein_coding	trr
FBgn0023519	0.206718	0.162535	0.314138	protein_coding	mRpL16
FBgn0023520	-0.256987	0.19409	0.356252	protein_coding	CG3857
FBgn0023521	-0.0284452	0.843109	0.911847	protein_coding	CG3587
FBgn0023522	-0.0359379	0.765869	0.860808	protein_coding	CG11596
FBgn0023525	0.0280141	0.831473	0.90357	protein_coding	CG3191
FBgn0023526	-0.204324	0.345527	0.525208	protein_coding	CG2865
FBgn0023527	-0.29824	0.0591917	0.151036	protein_coding	CG3071
FBgn0023528	0.228686	0.0278296	0.0870107	protein_coding	CG2924
FBgn0023529	-0.264101	0.0568484	0.146583	protein_coding	CG2918
FBgn0023530	1.1059	9.49933e-13	9.64285e-11	protein_coding	CG3740
FBgn0023531	-0.231022	0.227293	0.397433	protein_coding	CG32809
FBgn0023534	0.107871	0.596512	0.741393	protein_coding	CG17778
FBgn0023535	-0.363632	0.317726	0.497346	protein_coding	arg
FBgn0023536	-0.198049	0.128905	0.2671	protein_coding	CG3156
FBgn0023537	0.573479	0.000239758	0.00200816	protein_coding	CG17896
FBgn0023540	-0.753748	0.0242415	0.0783091	protein_coding	CG3630
FBgn0023541	0.2141	0.396722	0.572464	protein_coding	Cyp4d14
FBgn0023542	-0.546865	3.46159e-09	1.3414e-07	protein_coding	Nmd3
FBgn0023545	-0.292435	0.00367532	0.01798	protein_coding	PIG-K
FBgn0023549	-0.382249	0.00897364	0.0363106	protein_coding	Mct1
FBgn0023550	-0.937411	0.0111992	0.0430539	protein_coding	FarO
FBgn0024150	0.130614	0.586291	0.733671	protein_coding	Ac78C
FBgn0024179	-0.969672	1.7815e-07	4.19078e-06	protein_coding	wit
FBgn0024182	-0.306382	0.117197	0.249659	protein_coding	waw
FBgn0024183	-0.273801	0.00131779	0.00800187	protein_coding	vig
FBgn0024187	0.0331172	0.782521	0.871344	protein_coding	syd
FBgn0024188	0.142393	0.292156	0.470664	protein_coding	san
FBgn0024191	0.0604552	0.724822	0.833429	protein_coding	sip1
FBgn0024194	-0.0675084	0.694302	0.813052	protein_coding	rasp
FBgn0024196	0.610127	0.000443624	0.00331706	protein_coding	robl
FBgn0024222	0.229437	0.0747909	0.179371	protein_coding	IKKbeta
FBgn0024227	1.29682	1.47646e-05	0.000188113	protein_coding	aurB
FBgn0024230	0.304089	0.0916048	0.207494	protein_coding	Hs2st
FBgn0024234	0.361599	0.0350965	0.102491	protein_coding	gbb
FBgn0024236	-0.635291	1.13664e-10	6.28111e-09	protein_coding	foi
FBgn0024238	0.228078	0.123325	0.259399	protein_coding	Fim
FBgn0024244	0.0180138	0.93179	0.963142	protein_coding	drm
FBgn0024245	0.702878	0.00328999	0.0164835	protein_coding	dnt
FBgn0024248	-0.428509	0.000688064	0.00475988	protein_coding	chico
FBgn0024250	-0.210868	0.236986	0.408417	protein_coding	brk
FBgn0024251	-0.0579251	0.582828	0.730714	protein_coding	bbx
FBgn0024273	0.0570614	0.631516	0.769737	protein_coding	WASp
FBgn0024277	0.255456	0.0140791	0.0516031	protein_coding	trio
FBgn0024285	0.0264168	0.777628	0.867758	protein_coding	Srp54
FBgn0024288	1.00676	2.26979e-06	3.72541e-05	protein_coding	Sox100B
FBgn0024289	0.187515	0.358219	0.538106	protein_coding	Sodh-1
FBgn0024291	-0.317265	0.00675084	0.0290535	protein_coding	Sirt1
FBgn0024293	-0.267349	0.48623	0.652523	protein_coding	Spn43Ab
FBgn0024314	0.276188	0.0132117	0.0491375	protein_coding	Plap
FBgn0024315	-0.427104	0.00836966	0.0343881	protein_coding	Picot
FBgn0024319	1.0295	0.00122363	0.00754789	protein_coding	Nach
FBgn0024320	0.399197	0.00253052	0.0134658	protein_coding	Npc1a
FBgn0024321	0.417134	0.000573631	0.00411455	protein_coding	NK7.1
FBgn0024326	-0.0924146	0.175479	0.331876	protein_coding	Mkk4
FBgn0024329	-0.298127	0.0632235	0.158059	protein_coding	Mekk1
FBgn0024330	-0.114844	0.484402	0.651005	protein_coding	MED6
FBgn0024352	-0.0143752	0.909385	0.951374	protein_coding	Stip1
FBgn0024360	-0.0183888	0.91878	0.956059	protein_coding	MTPAP
FBgn0024361	0.584112	5.42798e-05	0.000584681	protein_coding	Tsp2A
FBgn0024362	0.0884322	0.343304	0.523035	protein_coding	Naa30A
FBgn0024364	-0.752952	1.81117e-08	5.5096e-07	protein_coding	CG11417
FBgn0024365	0.027978	0.766376	0.860963	protein_coding	CG12773
FBgn0024366	-0.387279	0.205525	0.370826	protein_coding	CG11409
FBgn0024371	0.188005	0.15741	0.307028	protein_coding	E2f2
FBgn0024432	0.305981	0.00209276	0.0115442	protein_coding	Dlc90F
FBgn0024491	0.184103	0.119253	0.252827	protein_coding	Bin1
FBgn0024509	0.0350026	0.668531	0.794285	protein_coding	Sec13
FBgn0024510	0.723115	2.9402e-05	0.000343661	protein_coding	dlt
FBgn0024542	0.212206	0.285651	0.46342	protein_coding	Neos
FBgn0024555	-0.0620887	0.46441	0.634384	protein_coding	flfl
FBgn0024556	-0.288054	0.00740742	0.0312598	protein_coding	mEFTu1
FBgn0024558	-0.353545	0.00539823	0.02439	protein_coding	Dph5
FBgn0024689	-0.0583951	0.62248	0.763328	protein_coding	fws
FBgn0024698	-0.145949	0.284806	0.462832	protein_coding	Cpsf160
FBgn0024728	0.0526889	0.592772	0.738285	protein_coding	Slip1
FBgn0024732	0.350048	0.160192	0.31109	protein_coding	Drep1
FBgn0024733	-0.494933	1.22512e-05	0.000160468	protein_coding	RpL10
FBgn0024734	0.190575	0.0724008	0.174897	protein_coding	PRL-1
FBgn0024754	0.226505	0.0245207	0.0790741	protein_coding	Flo1
FBgn0024804	0.360845	0.00391255	0.0189127	protein_coding	Dbp80
FBgn0024806	0.202286	0.0872704	0.200867	protein_coding	DIP2
FBgn0024807	-0.393018	0.000269037	0.00221082	protein_coding	DIP1
FBgn0024811	0.259656	0.0148133	0.0536207	protein_coding	Crk
FBgn0024814	0.0986902	0.232675	0.403744	protein_coding	Clc
FBgn0024833	0.189663	0.0210571	0.0705133	protein_coding	AP-1mu
FBgn0024841	0.244795	0.0954532	0.214109	protein_coding	Pcd
FBgn0024846	-0.052008	0.423442	0.597722	protein_coding	p38b
FBgn0024887	0.0271743	0.861479	0.924079	protein_coding	kin17
FBgn0024889	-0.150713	0.0676508	0.166217	protein_coding	Kap-alpha1
FBgn0024909	-0.0550451	0.792546	0.87811	protein_coding	Taf7
FBgn0024912	-0.109417	0.564832	0.717097	protein_coding	agt
FBgn0024913	0.0833548	0.798489	0.881786	protein_coding	Actbeta
FBgn0024920	1.34049	1.09839e-06	1.99569e-05	protein_coding	Ts
FBgn0024921	0.146401	0.0689345	0.168617	protein_coding	Tnpo
FBgn0024945	-0.255647	0.12722	0.264966	protein_coding	NitFhit
FBgn0024947	0.304568	0.0024467	0.0131019	protein_coding	NTPase
FBgn0024956	-0.124271	0.442942	0.615143	protein_coding	Mat1
FBgn0024957	0.35723	0.00201129	0.0111607	protein_coding	Irp-1B
FBgn0024958	0.0707826	0.38466	0.561851	protein_coding	Irp-1A
FBgn0024973	0.00457742	0.960227	0.979954	protein_coding	CG2701
FBgn0024975	-0.423401	0.140918	0.283566	protein_coding	CG2712
FBgn0024980	0.629168	0.000127065	0.00118666	protein_coding	Syx4
FBgn0024983	0.0386493	0.841033	0.910234	protein_coding	CG4293
FBgn0024985	-0.0248144	0.761234	0.858147	protein_coding	Rilpl
FBgn0024986	0.724994	1.07403e-05	0.000142882	protein_coding	CG3719
FBgn0024987	-0.27397	0.00636878	0.0278065	protein_coding	ssx
FBgn0024989	-0.800649	0.0371585	0.106711	protein_coding	CG3777
FBgn0024991	-0.0880418	0.635805	0.773149	protein_coding	CG2694
FBgn0024992	-0.0619523	0.572386	0.723031	protein_coding	Spg7
FBgn0024993	-0.369483	0.182329	0.340654	protein_coding	CG2662
FBgn0024994	0.0827614	0.524019	0.684577	protein_coding	Ugalt
FBgn0024995	0.417846	0.2021	0.366203	protein_coding	CG2680
FBgn0024996	0.0200296	0.849868	0.916404	protein_coding	eIF2Bbeta
FBgn0024997	-0.312845	0.0111076	0.0428297	protein_coding	CG2681
FBgn0024998	-0.221732	0.209419	0.374957	protein_coding	CG2685
FBgn0025109	-0.0544013	0.67815	0.800461	protein_coding	Bem46
FBgn0025111	-0.121388	0.665733	0.792414	protein_coding	Ant2
FBgn0025185	0.0337094	0.89662	0.944135	protein_coding	az2
FBgn0025186	0.271483	0.126495	0.264045	protein_coding	ari-2
FBgn0025335	0.245128	0.0175289	0.061243	protein_coding	Cpes
FBgn0025336	-0.234914	0.0537552	0.140504	protein_coding	CG4882
FBgn0025352	0.0583177	0.579489	0.72828	protein_coding	Mtpbeta
FBgn0025355	0.385714	0.00393677	0.0190101	protein_coding	SuUR
FBgn0025366	-0.722152	9.3111e-07	1.74261e-05	protein_coding	Ip259
FBgn0025373	0.277212	0.0213179	0.0711027	protein_coding	Fpps
FBgn0025381	-0.0782361	0.481187	0.648551	protein_coding	rush
FBgn0025383	-0.0398182	0.90874	0.951355	protein_coding	CG14780
FBgn0025388	-0.304414	0.235366	0.406827	protein_coding	CG12179
FBgn0025390	0.0471015	0.638424	0.774921	protein_coding	Mur2B
FBgn0025391	0.440989	0.175374	0.331804	protein_coding	Scgdelta
FBgn0025394	0.0835791	0.368466	0.547423	protein_coding	inc
FBgn0025454	0.214793	0.359206	0.539069	protein_coding	Cyp6g1
FBgn0025455	-0.32498	0.0097195	0.0386751	protein_coding	CycT
FBgn0025456	0.543519	0.00127206	0.00776454	protein_coding	CREG
FBgn0025457	0.129913	0.410614	0.585365	protein_coding	Bub3
FBgn0025463	-0.225926	0.0262533	0.0835649	protein_coding	Bap60
FBgn0025469	0.252652	0.0717712	0.173871	protein_coding	slv
FBgn0025519	0.0176418	0.900769	0.946583	protein_coding	fidipidine
FBgn0025525	-0.536478	0.00292838	0.0150347	protein_coding	bab2
FBgn0025549	0.385948	0.00996752	0.0393435	protein_coding	unc-119
FBgn0025558	0.0872098	0.718321	0.829119	protein_coding	CG4101
FBgn0025571	-0.370519	0.00104525	0.00667233	protein_coding	SF1
FBgn0025574	0.123342	0.509094	0.671909	protein_coding	Pli
FBgn0025582	-0.503185	1.19756e-07	2.97446e-06	protein_coding	eIF3e
FBgn0025592	-0.0751355	0.536609	0.694386	protein_coding	Gk1
FBgn0025595	-1.12884	0.0029491	0.0151244	protein_coding	AkhR
FBgn0025608	0.0340287	0.691122	0.810344	protein_coding	Faf2
FBgn0025615	-0.106182	0.255492	0.429607	protein_coding	Torsin
FBgn0025620	-1.19103	1.34509e-07	3.28842e-06	protein_coding	CG13360
FBgn0025621	-0.752823	1.41764e-08	4.44275e-07	protein_coding	CG16989
FBgn0025624	-0.0115238	0.930477	0.962643	protein_coding	CG4025
FBgn0025625	0.0684683	0.745562	0.847706	protein_coding	Sik2
FBgn0025626	-0.359553	0.0275986	0.08652	protein_coding	CG4281
FBgn0025627	-0.200793	0.582912	0.730714	protein_coding	CG4194
FBgn0025628	-0.41421	0.00364885	0.0178786	protein_coding	CG4199
FBgn0025629	-0.419607	0.00549682	0.0247516	protein_coding	CG4045
FBgn0025630	0.177091	0.315543	0.495276	protein_coding	Rtca
FBgn0025631	-0.154865	0.282929	0.461327	protein_coding	moody
FBgn0025632	0.127483	0.650338	0.782366	protein_coding	CG4313
FBgn0025633	0.218569	0.00640503	0.0278995	protein_coding	CG13366
FBgn0025634	-0.313069	0.0249422	0.0801841	protein_coding	CG13367
FBgn0025635	-0.203148	0.349045	0.52952	protein_coding	CG17829
FBgn0025637	0.33142	7.24803e-06	0.000101636	protein_coding	SkpA
FBgn0025638	0.247085	0.000589314	0.00420122	protein_coding	Roc1a
FBgn0025639	-0.189983	0.156673	0.305973	protein_coding	Hmt4-20
FBgn0025640	0.00993738	0.935745	0.965424	protein_coding	CG13369
FBgn0025641	0.523385	0.110666	0.239072	protein_coding	DAAM
FBgn0025642	2.88157	6.71506e-11	3.99439e-09	protein_coding	CG32812
FBgn0025643	0.146107	0.718166	0.829119	protein_coding	CG3588
FBgn0025674	-0.0825429	0.362215	0.54167	protein_coding	CycK
FBgn0025676	-0.187985	0.242495	0.414896	protein_coding	CkIIalpha-i3
FBgn0025678	0.82377	6.71283e-12	5.18109e-10	protein_coding	CaBP1
FBgn0025680	0.542317	0.000595801	0.00423137	protein_coding	cry
FBgn0025681	0.215281	0.00829577	0.0342152	protein_coding	CG3558
FBgn0025682	-0.175046	0.453815	0.624523	protein_coding	scf
FBgn0025683	0.0611394	0.515385	0.677818	protein_coding	CG3164
FBgn0025684	0.039918	0.748808	0.84971	protein_coding	MFS18
FBgn0025686	0.299914	0.384317	0.56168	protein_coding	Amnionless
FBgn0025692	0.727838	1.73886e-06	2.93585e-05	protein_coding	Lfg
FBgn0025693	-0.154564	0.0535483	0.140205	protein_coding	ZnT41F
FBgn0025697	-0.0133233	0.912234	0.952416	protein_coding	santa-maria
FBgn0025700	0.0871564	0.455695	0.626303	protein_coding	CG5885
FBgn0025702	-0.282664	0.327359	0.507588	protein_coding	Srpk79D
FBgn0025709	0.281965	0.417043	0.59137	protein_coding	CNT2
FBgn0025712	0.387431	0.208215	0.373731	protein_coding	CG13920
FBgn0025716	0.112333	0.368295	0.547423	protein_coding	Bap55
FBgn0025720	-0.0446388	0.655153	0.784788	protein_coding	Ate1
FBgn0025724	0.174577	0.053716	0.14044	protein_coding	beta'COP
FBgn0025725	-0.181331	0.0189975	0.0650359	protein_coding	alphaCOP
FBgn0025726	-0.92348	5.66744e-10	2.71427e-08	protein_coding	unc-13
FBgn0025739	-0.315344	0.302487	0.481625	protein_coding	pon
FBgn0025740	-0.0904294	0.338233	0.518444	protein_coding	PlexB
FBgn0025741	0.15022	0.0238102	0.0773712	protein_coding	PlexA
FBgn0025742	0.334858	0.000103119	0.000997959	protein_coding	mtm
FBgn0025743	0.0790932	0.540732	0.697982	protein_coding	mbt
FBgn0025777	0.183637	0.0642685	0.160097	protein_coding	homer
FBgn0025781	0.175463	0.375244	0.553444	protein_coding	Cdc16
FBgn0025790	-0.00324883	0.978656	0.990321	protein_coding	TBPH
FBgn0025800	-0.518305	1.34536e-06	2.37063e-05	protein_coding	Smox
FBgn0025802	0.0427072	0.709484	0.822477	protein_coding	Sbf
FBgn0025807	0.258269	0.293992	0.472725	protein_coding	Rad9
FBgn0025808	-0.309939	0.194144	0.35628	protein_coding	Rad17
FBgn0025809	0.367674	0.0688544	0.168573	protein_coding	Paf-AHalpha
FBgn0025814	0.247074	0.0598152	0.152081	protein_coding	Mgstl
FBgn0025815	0.628929	0.00170706	0.00981061	protein_coding	Mcm6
FBgn0025820	0.552325	9.86536e-05	0.000959951	protein_coding	JTBR
FBgn0025825	0.155772	0.358786	0.538699	protein_coding	HDAC3
FBgn0025830	-0.124398	0.300061	0.478973	protein_coding	IntS8
FBgn0025832	0.37591	0.0684179	0.167705	protein_coding	Fen1
FBgn0025835	0.734501	0.0234264	0.0764695	protein_coding	CG17707
FBgn0025836	-0.214481	0.00774119	0.0322602	protein_coding	RhoGAP1A
FBgn0025837	0.14156	0.655376	0.784788	protein_coding	CG17636
FBgn0025839	0.35454	0.0133296	0.0495167	protein_coding	ND-B14.5A
FBgn0025864	0.0254035	0.781942	0.871011	protein_coding	Crag
FBgn0025865	0.33618	8.9175e-05	0.000884082	protein_coding	Cortactin
FBgn0025866	0.187595	0.265714	0.441391	protein_coding	CalpB
FBgn0025874	-0.255971	0.27369	0.451156	protein_coding	Meics
FBgn0025879	0.0327179	0.882152	0.936184	protein_coding	Timp
FBgn0025885	0.8444	3.41675e-15	5.50156e-13	protein_coding	Inos
FBgn0025936	0.120035	0.156273	0.305321	protein_coding	Eph
FBgn0026015	-0.0884442	0.472596	0.641135	protein_coding	Top3beta
FBgn0026056	-0.183504	0.184383	0.343257	protein_coding	Rlip
FBgn0026059	0.167606	0.264144	0.439351	protein_coding	Mhcl
FBgn0026060	-0.0214944	0.866221	0.926044	protein_coding	Mipp2
FBgn0026061	-1.25095	1.4142e-14	2.1302e-12	protein_coding	Mipp1
FBgn0026076	0.185616	0.0559255	0.144919	protein_coding	UBL3
FBgn0026077	-0.4979	0.00736666	0.0311683	protein_coding	Gasp
FBgn0026079	-0.202436	0.0517116	0.13677	protein_coding	Nsun2
FBgn0026080	-0.0977786	0.458145	0.628838	protein_coding	Tip60
FBgn0026083	-0.074602	0.357603	0.537267	protein_coding	tyf
FBgn0026084	0.477995	0.0164409	0.0582494	protein_coding	cib
FBgn0026085	0.293186	0.375965	0.554114	protein_coding	dgt4
FBgn0026086	-0.185397	0.0878439	0.201779	protein_coding	Adar
FBgn0026088	0.402012	0.00344113	0.0170849	protein_coding	CG14818
FBgn0026089	0.0107345	0.938277	0.966638	protein_coding	CG14817
FBgn0026090	0.299773	0.0105106	0.0409677	protein_coding	CG14812
FBgn0026143	0.15076	0.351595	0.532	protein_coding	Cdc45
FBgn0026144	-0.53853	0.129747	0.268077	protein_coding	CBP
FBgn0026147	-0.463607	0.000184448	0.00162659	protein_coding	TTLL4A
FBgn0026148	0.313851	0.270407	0.447358	protein_coding	CG12253
FBgn0026149	-0.104368	0.550247	0.705098	protein_coding	BCL7-like
FBgn0026150	-0.113282	0.168582	0.322421	protein_coding	ApepP
FBgn0026160	-0.819744	4.18797e-07	8.65297e-06	protein_coding	tna
FBgn0026179	0.131257	0.182346	0.340654	protein_coding	siz
FBgn0026181	0.443057	1.39119e-10	7.55365e-09	protein_coding	Rok
FBgn0026189	0.150147	0.388002	0.565032	protein_coding	promL
FBgn0026192	0.139478	0.206838	0.372413	protein_coding	par-6
FBgn0026196	-0.539547	0.00129303	0.00787197	protein_coding	nop5
FBgn0026199	0.0785347	0.575607	0.725264	protein_coding	myo
FBgn0026206	-0.114998	0.387024	0.564263	protein_coding	mei-P26
FBgn0026207	-0.204123	0.133595	0.273375	protein_coding	mbo
FBgn0026238	0.170892	0.156817	0.306127	protein_coding	gus
FBgn0026239	-0.294182	0.0874101	0.201114	protein_coding	gukh
FBgn0026250	-0.317442	0.00097591	0.00630292	protein_coding	eIF1A
FBgn0026252	-0.44837	2.48069e-05	0.000293999	protein_coding	msk
FBgn0026257	0.200302	0.485562	0.651906	protein_coding	cav
FBgn0026259	-0.259905	0.0308617	0.0931236	protein_coding	eIF5B
FBgn0026261	0.0862659	0.486059	0.652386	protein_coding	bonsai
FBgn0026262	0.0258493	0.761297	0.858147	protein_coding	bip2
FBgn0026263	-0.0860681	0.686936	0.807463	protein_coding	bip1
FBgn0026309	0.278657	0.19614	0.358675	protein_coding	aft
FBgn0026313	-0.143043	0.104546	0.229515	protein_coding	X11L
FBgn0026314	0.277582	0.311032	0.49058	protein_coding	Ugt35B1
FBgn0026315	-0.271531	0.00126207	0.00772886	protein_coding	Ugt35A1
FBgn0026316	0.206083	0.0104055	0.0406769	protein_coding	Ubc10
FBgn0026317	-0.0535487	0.561095	0.7141	protein_coding	Tsc1
FBgn0026319	0.740495	0.000476275	0.00352451	protein_coding	Traf4
FBgn0026323	-0.00714866	0.933392	0.963731	protein_coding	Tak1
FBgn0026324	0.423223	0.0111854	0.0430411	protein_coding	Taf10b
FBgn0026326	-0.00059796	0.996231	0.998955	protein_coding	Mad1
FBgn0026361	0.6591	0.0606277	0.153484	protein_coding	Sep5
FBgn0026369	0.183346	0.0374092	0.107266	protein_coding	Sara
FBgn0026370	-0.0521458	0.522857	0.683984	NA	NA
FBgn0026371	0.411411	0.00456575	0.0212878	protein_coding	SAK
FBgn0026372	-0.761345	1.03051e-07	2.59406e-06	protein_coding	RpL23A
FBgn0026373	0.00512974	0.970489	0.985902	protein_coding	RpII33
FBgn0026374	0.182971	0.442127	0.614438	protein_coding	Rhp
FBgn0026375	0.278218	0.0218109	0.0724368	protein_coding	RhoGAPp190
FBgn0026376	0.0192994	0.944391	0.97064	protein_coding	Rgl
FBgn0026378	0.266511	0.0360523	0.104628	protein_coding	Rep
FBgn0026379	0.0447583	0.690921	0.810209	protein_coding	Pten
FBgn0026380	0.168246	0.0820805	0.192686	protein_coding	Prosbeta3
FBgn0026393	-0.343939	0.230168	0.400942	protein_coding	Or43b
FBgn0026400	-0.00450547	0.965766	0.982707	protein_coding	Noa36
FBgn0026401	0.0270038	0.786364	0.874476	protein_coding	Nipped-B
FBgn0026402	0.0401945	0.866825	0.926292	protein_coding	NiPp1
FBgn0026403	-0.982306	0.00257483	0.0136394	protein_coding	Ndg
FBgn0026404	0.402665	0.0656951	0.16261	protein_coding	Dronc
FBgn0026409	-0.382728	3.81978e-05	0.000429277	protein_coding	Mpcp2
FBgn0026415	-0.346481	0.193526	0.355636	protein_coding	Idgf4
FBgn0026417	0.228787	0.312501	0.492403	protein_coding	Hus1-like
FBgn0026418	-0.00146553	0.985419	0.993504	protein_coding	Hsc70Cb
FBgn0026427	-0.24328	0.0656725	0.162597	protein_coding	Su(var)2-HP2
FBgn0026428	-0.229077	0.370403	0.549166	protein_coding	HDAC6
FBgn0026430	0.0379998	0.811824	0.890973	protein_coding	Grip84
FBgn0026431	0.80322	1.86471e-06	3.12648e-05	protein_coding	Grip75
FBgn0026432	0.103315	0.586907	0.734145	protein_coding	Grip163
FBgn0026433	-0.059699	0.783783	0.872437	protein_coding	Grip128
FBgn0026439	-0.755289	0.00146475	0.00870182	protein_coding	Eaat1
FBgn0026441	-0.286222	0.0658459	0.16281	protein_coding	ear
FBgn0026479	0.369345	0.000121795	0.00114546	protein_coding	Drp1
FBgn0026533	-0.487261	8.94268e-06	0.000122099	protein_coding	Dek
FBgn0026562	0.363835	0.0606958	0.153573	protein_coding	SPARC
FBgn0026563	0.246466	0.481552	0.648949	protein_coding	CG1979
FBgn0026565	-0.552464	9.07225e-08	2.32763e-06	protein_coding	Ass
FBgn0026566	0.0783931	0.526509	0.68632	protein_coding	CG1307
FBgn0026570	0.613075	0.0039626	0.0190953	protein_coding	CG5704
FBgn0026573	-0.429739	0.000253706	0.00210985	protein_coding	ADD1
FBgn0026575	-0.152927	0.629233	0.767656	protein_coding	hang
FBgn0026576	-0.435648	0.000744257	0.00506604	protein_coding	Pisd
FBgn0026577	-0.26582	0.0027875	0.0144947	protein_coding	CG8677
FBgn0026582	0.321314	0.144998	0.289531	protein_coding	Hmg-2
FBgn0026592	0.0523366	0.819372	0.896159	protein_coding	Fie
FBgn0026593	0.333967	0.025002	0.0803211	protein_coding	CG5707
FBgn0026597	-0.135627	0.143529	0.287274	protein_coding	Axn
FBgn0026598	0.263942	0.0983065	0.218591	protein_coding	Apc2
FBgn0026602	0.386699	0.201658	0.365534	protein_coding	Ady43A
FBgn0026616	-0.459852	0.152692	0.300271	protein_coding	alpha-Man-IIb
FBgn0026619	-0.298449	0.0566754	0.146415	protein_coding	Taz
FBgn0026620	0.442327	0.000553358	0.00399367	protein_coding	tacc
FBgn0026630	0.0376578	0.606009	0.749109	protein_coding	nes
FBgn0026634	0.149941	0.169631	0.323897	protein_coding	Cog2
FBgn0026666	0.0695983	0.644238	0.779123	protein_coding	MagR
FBgn0026679	-0.0903558	0.469276	0.638393	protein_coding	IntS4
FBgn0026702	-0.0744931	0.726713	0.834371	protein_coding	Pop1
FBgn0026713	0.202919	0.0542605	0.141587	protein_coding	l(1)G0007
FBgn0026718	0.522813	0.0189299	0.0648882	protein_coding	Agpat2
FBgn0026721	-0.386765	0.283389	0.461734	protein_coding	fat-spondin
FBgn0026722	-0.38044	0.0227122	0.0746601	protein_coding	drosha
FBgn0026737	-0.0771347	0.73946	0.843316	protein_coding	CG6171
FBgn0026738	0.0720662	0.716681	0.828147	protein_coding	CG7857
FBgn0026741	-0.0695734	0.561464	0.714375	protein_coding	mRpL18
FBgn0026749	0.0175143	0.891615	0.94077	protein_coding	Yippee
FBgn0026751	0.17633	0.365135	0.544552	protein_coding	XRCC1
FBgn0026755	-1.86399	8.93511e-11	5.11933e-09	protein_coding	Ugt37B1
FBgn0026756	0.305117	0.213959	0.380833	protein_coding	Ugt37A1
FBgn0026760	-0.0997927	0.352982	0.533155	protein_coding	Tehao
FBgn0026761	-0.455759	0.000107152	0.00102846	protein_coding	Trap1
FBgn0026777	0.271553	0.0019927	0.0110971	protein_coding	Rad23
FBgn0026778	0.406572	0.218938	0.387614	protein_coding	Rad1
FBgn0026787	-0.099334	0.187205	0.346749	protein_coding	Nhe1
FBgn0026869	-0.178125	0.0834279	0.19454	protein_coding	Thd1
FBgn0026872	0.292275	0.0678388	0.166547	protein_coding	CG14777
FBgn0026873	-0.0633564	0.710907	0.823717	protein_coding	MED18
FBgn0026876	-0.377495	0.227943	0.398345	protein_coding	CG11403
FBgn0026878	0.29675	0.348695	0.529211	protein_coding	CG4325
FBgn0026879	-0.0749578	0.380447	0.557916	protein_coding	CG13364
FBgn0027052	0.052827	0.600812	0.745077	protein_coding	STUB1
FBgn0027053	0.0146349	0.905454	0.949796	protein_coding	CSN5
FBgn0027054	-0.0973058	0.408458	0.583717	protein_coding	CSN4
FBgn0027055	0.0595051	0.566094	0.717919	protein_coding	CSN3
FBgn0027057	0.278642	0.0167998	0.0592499	protein_coding	CSN1b
FBgn0027066	0.449448	3.49734e-06	5.40756e-05	protein_coding	Eb1
FBgn0027070	0.589154	0.063954	0.159398	protein_coding	Ugt36E1
FBgn0027073	-0.243196	0.0707381	0.172082	protein_coding	Ugt49B1
FBgn0027079	0.0371413	0.727074	0.834683	protein_coding	ValRS
FBgn0027080	-0.187144	0.0440412	0.120678	protein_coding	TyrRS
FBgn0027081	0.25534	0.0115225	0.0440299	protein_coding	ThrRS
FBgn0027082	-0.0624901	0.731565	0.837697	protein_coding	ProRS-m
FBgn0027083	0.448995	0.0103941	0.0406492	protein_coding	MetRS-m
FBgn0027084	-0.235805	0.0211568	0.0707677	protein_coding	LysRS
FBgn0027085	0.0632307	0.599785	0.744371	protein_coding	LeuRS-m
FBgn0027086	-0.512354	7.38333e-07	1.43353e-05	protein_coding	IleRS
FBgn0027087	0.159747	0.111196	0.239885	protein_coding	HisRS
FBgn0027088	-0.0746356	0.324877	0.504746	protein_coding	GlyRS
FBgn0027090	-0.121274	0.163728	0.31553	protein_coding	GlnRS
FBgn0027091	0.215869	0.0363888	0.105125	protein_coding	CysRS
FBgn0027093	0.20262	0.039513	0.111555	protein_coding	ArgRS
FBgn0027094	-0.105104	0.150858	0.297103	protein_coding	AlaRS
FBgn0027095	0.502705	4.82074e-06	7.12357e-05	protein_coding	Manf
FBgn0027101	0.537058	0.000152871	0.00138474	protein_coding	Dyrk3
FBgn0027106	-0.0390002	0.749184	0.849946	protein_coding	Inx7
FBgn0027108	-0.399412	5.85037e-07	1.17246e-05	protein_coding	Inx2
FBgn0027109	0.0108609	0.943804	0.970618	protein_coding	NPF
FBgn0027259	0.847804	0.00577743	0.0256808	protein_coding	Kmn1
FBgn0027279	0.0928708	0.322233	0.501806	protein_coding	l(1)G0196
FBgn0027280	0.0778275	0.687177	0.807645	protein_coding	l(1)G0193
FBgn0027287	0.0940396	0.461124	0.631553	protein_coding	Gmap
FBgn0027291	-0.405568	0.000414996	0.0031535	protein_coding	Idh3a
FBgn0027296	-0.48668	0.0035845	0.0176373	protein_coding	temp
FBgn0027329	-0.0370982	0.722731	0.83205	protein_coding	CCT6
FBgn0027330	-0.375975	0.00607613	0.0267161	protein_coding	l(1)G0020
FBgn0027334	-0.731419	2.02139e-06	3.36501e-05	protein_coding	l(1)G0004
FBgn0027335	0.0813531	0.390621	0.567242	protein_coding	Rip11
FBgn0027338	-0.332205	8.63342e-07	1.64211e-05	protein_coding	Kap-alpha3
FBgn0027339	-0.603028	7.90245e-06	0.000109823	protein_coding	jim
FBgn0027341	-0.390856	0.0421973	0.116973	NA	NA
FBgn0027342	0.105392	0.334134	0.514676	protein_coding	fz4
FBgn0027343	-0.0568415	0.787027	0.874693	protein_coding	fz3
FBgn0027348	-0.232005	0.266492	0.442557	protein_coding	bgm
FBgn0027356	-0.340894	0.218119	0.386677	protein_coding	Amph
FBgn0027358	0.0141385	0.92651	0.960662	protein_coding	Tim9b
FBgn0027359	-0.146446	0.243053	0.415282	protein_coding	Tim8
FBgn0027360	-0.173679	0.0536109	0.140205	protein_coding	Tim10
FBgn0027363	0.202966	0.0384359	0.109304	protein_coding	Stam
FBgn0027375	-0.661968	2.42143e-05	0.000288073	protein_coding	RecQ5
FBgn0027378	-0.0650383	0.626846	0.766201	protein_coding	MRG15
FBgn0027453	0.185738	0.245446	0.417919	protein_coding	Dnz1
FBgn0027490	-0.291822	0.258185	0.432966	protein_coding	D12
FBgn0027492	0.123888	0.305826	0.485387	protein_coding	wdb
FBgn0027493	-0.446953	0.000612736	0.00433511	protein_coding	AdSS
FBgn0027495	0.111624	0.398764	0.574434	protein_coding	Smyd4-4
FBgn0027496	0.630357	9.37864e-06	0.000127122	protein_coding	epsilonCOP
FBgn0027497	0.13906	0.150477	0.296779	protein_coding	Madm
FBgn0027498	-0.637814	0.00494666	0.022679	protein_coding	CG2061
FBgn0027499	-0.615222	0.000168777	0.00151122	protein_coding	wde
FBgn0027500	0.469029	0.0837558	0.194915	protein_coding	spd-2
FBgn0027503	-0.347282	0.0283872	0.08834	protein_coding	CG11970
FBgn0027504	-0.113271	0.297981	0.476842	protein_coding	CG8878
FBgn0027505	0.352607	0.00613789	0.0269242	protein_coding	Rab3-GAP
FBgn0027506	-0.508606	0.00653294	0.0282529	protein_coding	EDTP
FBgn0027507	-0.0191181	0.868654	0.927232	protein_coding	CG1344
FBgn0027508	0.0400301	0.665852	0.792455	protein_coding	Tnks
FBgn0027509	0.195843	0.0538474	0.140705	protein_coding	TBCD
FBgn0027512	-0.216499	0.273433	0.450925	protein_coding	CG10254
FBgn0027513	0.852175	0.0116484	0.0443835	protein_coding	ana2
FBgn0027514	0.0271178	0.898812	0.945484	protein_coding	CG1024
FBgn0027515	-0.0854386	0.581233	0.72949	protein_coding	CG7115
FBgn0027518	-0.307629	0.0953012	0.214014	protein_coding	Wdr24
FBgn0027521	0.532758	0.108509	0.235886	protein_coding	CG3679
FBgn0027524	0.382982	0.00265803	0.0140008	protein_coding	CG3909
FBgn0027525	-0.885779	2.64432e-08	7.76581e-07	protein_coding	LTV1
FBgn0027526	-0.217157	0.219312	0.388128	protein_coding	Ublcp1
FBgn0027528	-0.202361	0.124021	0.260512	protein_coding	goe
FBgn0027529	-0.0815319	0.585968	0.73356	protein_coding	tapas
FBgn0027532	-0.472102	1.09019e-05	0.000144826	protein_coding	CG7139
FBgn0027535	-0.203626	0.0843649	0.195764	protein_coding	botv
FBgn0027537	0.147101	0.22874	0.399141	protein_coding	Nup93-1
FBgn0027538	0.542928	2.7979e-05	0.000327439	protein_coding	beta4GalNAcTA
FBgn0027539	0.0302013	0.86645	0.926044	protein_coding	lili
FBgn0027547	-0.191735	0.122186	0.257757	protein_coding	CG1927
FBgn0027548	-0.0390305	0.794724	0.879688	protein_coding	nito
FBgn0027549	-0.0911019	0.154604	0.303202	protein_coding	Nulp1
FBgn0027550	0.275062	0.298671	0.477292	protein_coding	CG6495
FBgn0027552	0.0378198	0.791192	0.876921	protein_coding	CG10863
FBgn0027553	0.240748	0.0825044	0.193304	protein_coding	NELF-B
FBgn0027554	0.531047	1.8079e-08	5.5096e-07	protein_coding	CG8042
FBgn0027556	0.253055	0.324866	0.504746	protein_coding	CG4928
FBgn0027558	0.853549	0.000203607	0.00177226	protein_coding	Pgant3
FBgn0027560	0.301685	0.359913	0.539525	protein_coding	Tps1
FBgn0027561	0.425343	0.00413551	0.0197049	protein_coding	CG18659
FBgn0027562	-0.0470786	0.894274	0.942303	protein_coding	CG10345
FBgn0027563	0.00237001	0.99358	0.998283	protein_coding	CG9631
FBgn0027564	0.274557	0.0370445	0.106416	protein_coding	CG3149
FBgn0027565	-0.334879	0.0301255	0.091603	protein_coding	CG5498
FBgn0027567	-0.313872	0.000771698	0.00520702	protein_coding	CG8108
FBgn0027568	0.0262298	0.789034	0.875569	protein_coding	Cand1
FBgn0027569	0.555285	4.95344e-05	0.000539163	protein_coding	cert
FBgn0027570	0.230417	0.348484	0.529018	protein_coding	Nep2
FBgn0027572	0.172043	0.500923	0.665735	protein_coding	CG5009
FBgn0027574	-0.0314922	0.866437	0.926044	protein_coding	CG5815
FBgn0027575	-0.873014	0.00750757	0.0315436	protein_coding	GABA-B-R2
FBgn0027578	-0.803749	0.0202428	0.0684091	protein_coding	Nepl21
FBgn0027579	0.107191	0.442741	0.615018	protein_coding	mino
FBgn0027580	-0.00687818	0.972659	0.987122	protein_coding	PCB
FBgn0027581	-0.0201638	0.830798	0.903155	protein_coding	CG6191
FBgn0027582	-0.181342	0.0293407	0.0902249	protein_coding	CG6230
FBgn0027583	0.107403	0.327025	0.50724	protein_coding	CG7601
FBgn0027585	-0.309213	0.251006	0.424818	protein_coding	CG8740
FBgn0027586	0.590912	0.00551865	0.0248259	protein_coding	CG5867
FBgn0027587	0.00547235	0.962536	0.981203	protein_coding	CG7028
FBgn0027588	0.00589602	0.939262	0.967439	protein_coding	GCS2alpha
FBgn0027590	0.0619458	0.60708	0.749764	protein_coding	GstE12
FBgn0027592	-0.128308	0.47286	0.6414	protein_coding	MED15
FBgn0027594	-0.00215767	0.986719	0.994382	protein_coding	drpr
FBgn0027596	-0.436985	0.0120943	0.0456359	protein_coding	Kank
FBgn0027597	0.245423	0.0525527	0.138289	protein_coding	CG17712
FBgn0027598	0.157363	0.223327	0.393074	protein_coding	cindr
FBgn0027599	-0.344946	0.00727932	0.0309148	protein_coding	CG2790
FBgn0027601	1.21982	1.20291e-14	1.84163e-12	protein_coding	pdgy
FBgn0027602	-0.410638	0.0252648	0.0810529	protein_coding	CG8611
FBgn0027603	-0.0991038	0.339855	0.520057	protein_coding	Ulp1
FBgn0027607	-0.159243	0.0209724	0.0703526	protein_coding	CG8230
FBgn0027608	-0.424812	0.119962	0.253984	protein_coding	CG2082
[truncated: 7,340 more rows]

## Sheet: Senolytic vs. Control
gene_id	log2FoldChange	pvalue	padj	gene_biotype	external_gene_name
FBgn0000003	0.326092	0.318351	0.482632	ncRNA	7SLRNA:CR32864
FBgn0000008	1.30263	7.25775e-10	2.04774e-08	protein_coding	a
FBgn0000014	-0.0585109	0.846092	0.906214	protein_coding	abd-A
FBgn0000015	-0.42278	0.253674	0.411223	protein_coding	Abd-B
FBgn0000017	-0.170584	0.186736	0.329354	protein_coding	Abl
FBgn0000018	-0.138205	0.323206	0.487	protein_coding	abo
FBgn0000024	-0.661182	0.000561151	0.00319743	protein_coding	Ace
FBgn0000032	0.0595214	0.560988	0.7021	protein_coding	Acph-1
FBgn0000042	0.598625	0.000352617	0.00213605	protein_coding	Act5C
FBgn0000043	1.57167	1.15723e-09	3.10556e-08	protein_coding	Act42A
FBgn0000044	1.06899	2.56927e-06	2.9696e-05	protein_coding	Act57B
FBgn0000045	-0.787814	0.0166397	0.0524639	protein_coding	Act79B
FBgn0000046	1.29894	1.96848e-07	3.00878e-06	protein_coding	Act87E
FBgn0000052	-0.15079	0.344596	0.509798	protein_coding	Pfas
FBgn0000053	0.130679	0.487629	0.640741	protein_coding	Gart
FBgn0000055	-0.23595	0.361069	0.525565	protein_coding	Adh
FBgn0000056	-0.26445	0.428119	0.586391	protein_coding	Adhr
FBgn0000057	-0.110201	0.4326	0.589875	protein_coding	adp
FBgn0000063	-0.0318209	0.928757	0.957675	protein_coding	Mps1
FBgn0000064	-0.205962	8.22745e-05	0.000615674	protein_coding	Ald1
FBgn0000075	-1.52689	4.88081e-06	5.2393e-05	protein_coding	amd
FBgn0000077	-0.0157789	0.926253	0.956995	protein_coding	amx
FBgn0000078	0.384663	0.173018	0.312295	protein_coding	Amy-d
FBgn0000079	0.419848	0.113629	0.22873	protein_coding	Amy-p
FBgn0000083	0.535193	0.00135437	0.00667651	protein_coding	AnxB9
FBgn0000084	1.23821	1.05902e-18	1.83151e-16	protein_coding	AnxB10
FBgn0000097	0.26158	0.00672036	0.0250945	protein_coding	aop
FBgn0000100	-0.601852	5.62787e-06	5.92504e-05	protein_coding	RpLP0
FBgn0000108	-0.409535	0.0628733	0.148418	protein_coding	Appl
FBgn0000109	0.130521	0.323443	0.487169	protein_coding	Aprt
FBgn0000114	-0.97058	0.00809295	0.0291356	protein_coding	bru1
FBgn0000115	0.0590769	0.575338	0.713936	protein_coding	Arl1
FBgn0000116	0.0719378	0.618057	0.748545	protein_coding	Argk
FBgn0000117	0.0932205	0.171732	0.311298	protein_coding	arm
FBgn0000119	-0.0673992	0.559552	0.701289	protein_coding	arr
FBgn0000120	-3.13364	3.12489e-13	1.91996e-11	protein_coding	Arr1
FBgn0000121	-0.964435	0.0200899	0.0607772	protein_coding	Arr2
FBgn0000139	-0.334412	0.00175948	0.00836222	protein_coding	ash2
FBgn0000140	0.5532	0.0989884	0.207137	protein_coding	asp
FBgn0000146	-0.498339	0.169854	0.309153	protein_coding	aub
FBgn0000147	0.25788	0.466007	0.622343	protein_coding	aurA
FBgn0000150	-0.0470293	0.596783	0.730357	protein_coding	awd
FBgn0000152	0.0738267	0.722726	0.824283	protein_coding	Axs
FBgn0000153	-1.49461	0.000103329	0.000752132	protein_coding	b
FBgn0000163	0.289656	0.029505	0.0830212	protein_coding	baz
FBgn0000173	0.209495	0.03638	0.0978268	protein_coding	ben
FBgn0000180	1.03294	4.50024e-05	0.000365459	protein_coding	bib
FBgn0000181	-0.180046	0.0182417	0.0565227	protein_coding	bic
FBgn0000182	-0.608991	0.0755225	0.169422	protein_coding	BicC
FBgn0000183	0.322642	6.56632e-07	8.83615e-06	protein_coding	BicD
FBgn0000212	-0.136719	0.227729	0.38114	protein_coding	brm
FBgn0000221	-0.140462	0.500532	0.650918	protein_coding	brn
FBgn0000228	-0.045079	0.670437	0.786906	protein_coding	Bsg25D
FBgn0000229	0.00829736	0.938216	0.96328	protein_coding	bsk
FBgn0000239	0.172608	0.0499208	0.124323	protein_coding	bur
FBgn0000241	0.680488	0.00346529	0.0146436	protein_coding	bw
FBgn0000244	-0.0625875	0.71295	0.81733	protein_coding	by
FBgn0000246	-0.266355	0.247212	0.403692	protein_coding	c(3)G
FBgn0000247	0.0072894	0.926948	0.957077	protein_coding	ca
FBgn0000250	-0.0400262	0.720026	0.822648	protein_coding	cact
FBgn0000251	-0.267975	0.204649	0.353078	protein_coding	cad
FBgn0000253	0.230504	0.0259601	0.074877	protein_coding	Cam
FBgn0000256	0.193801	0.287208	0.448985	protein_coding	capu
FBgn0000257	0.156582	0.139874	0.266697	protein_coding	car
FBgn0000259	0.090259	0.356407	0.520808	protein_coding	CkIIbeta
FBgn0000261	0.086984	0.566243	0.706499	protein_coding	Cat
FBgn0000273	-0.0911743	0.221363	0.373633	protein_coding	Pka-C1
FBgn0000276	0.290389	0.328887	0.492539	protein_coding	CecA1
FBgn0000283	-0.252514	0.00225659	0.0102344	protein_coding	Cp190
FBgn0000286	-0.0215393	0.835626	0.898034	protein_coding	Cf2
FBgn0000289	-0.166738	0.023691	0.0694664	protein_coding	cg
FBgn0000299	-0.777158	0.00261164	0.0116088	protein_coding	Col4a1
FBgn0000307	0.224822	0.0314396	0.0872018	protein_coding	chif
FBgn0000308	0.656841	3.94968e-11	1.52866e-09	protein_coding	chic
FBgn0000316	0.0139519	0.901072	0.940341	protein_coding	cin
FBgn0000317	0.0548598	0.645458	0.768575	protein_coding	ck
FBgn0000318	0.265515	0.0219538	0.0652534	protein_coding	cl
FBgn0000319	0.311663	0.000763753	0.00413565	protein_coding	Chc
FBgn0000326	0.353264	0.0045688	0.0183993	protein_coding	clt
FBgn0000330	-0.0232301	0.855909	0.912898	protein_coding	cm
FBgn0000339	0.220831	0.0158466	0.0506549	protein_coding	cni
FBgn0000346	0.303098	0.376131	0.53892	protein_coding	comt
FBgn0000352	-0.558169	0.00406689	0.0167095	protein_coding	cos
FBgn0000355	0.101017	0.00941798	0.0328679	protein_coding	Cp15
FBgn0000357	0.869534	0.00136729	0.00673121	protein_coding	Cp18
FBgn0000359	-0.174785	0.548095	0.691991	protein_coding	Cp36
FBgn0000360	-0.259504	0.270028	0.430193	protein_coding	Cp38
FBgn0000370	-0.32918	4.25376e-05	0.000347254	protein_coding	crc
FBgn0000376	-0.3635	0.0450762	0.11505	protein_coding	crm
FBgn0000377	-0.0496827	0.74046	0.836882	protein_coding	crn
FBgn0000382	-0.31327	0.0154033	0.0495697	protein_coding	csw
FBgn0000384	0.085623	0.50699	0.656332	protein_coding	cta
FBgn0000392	0.16956	0.412079	0.57285	protein_coding	cup
FBgn0000394	0.188482	0.374207	0.536905	protein_coding	cv
FBgn0000395	1.4815	2.65786e-07	3.9151e-06	protein_coding	cv-2
FBgn0000404	0.842019	0.000930413	0.00489528	protein_coding	CycA
FBgn0000405	-0.0414733	0.903817	0.941942	protein_coding	CycB
FBgn0000406	-0.398973	0.254107	0.411711	protein_coding	Cyt-b5-r
FBgn0000412	0.0124156	0.899207	0.939677	protein_coding	D1
FBgn0000414	0.15255	0.613162	0.744354	protein_coding	Dab
FBgn0000416	0.109964	0.208796	0.357592	protein_coding	Sap-r
FBgn0000422	-2.15573	2.35532e-17	3.28304e-15	protein_coding	Ddc
FBgn0000426	0.270262	0.0745723	0.167815	protein_coding	SmF
FBgn0000442	0.40315	0.203988	0.352264	protein_coding	Pkg21D
FBgn0000447	-0.489832	3.04779e-05	0.000260636	protein_coding	Dhod
FBgn0000448	0.902624	0.000829751	0.00443817	protein_coding	Hr3
FBgn0000449	-1.00444	0.000404374	0.00238933	protein_coding	dib
FBgn0000451	-0.338136	0.361227	0.525593	protein_coding	ect
FBgn0000454	0.179117	0.0799285	0.176842	protein_coding	Dip-B
FBgn0000455	0.195416	0.0299825	0.0840355	protein_coding	Dip-C
FBgn0000459	0.484193	0.13161	0.255652	protein_coding	disco
FBgn0000463	1.05284	8.94931e-09	1.96653e-07	protein_coding	Dl
FBgn0000464	-0.216215	0.0825617	0.181081	protein_coding	Lar
FBgn0000473	-1.4281	1.43768e-16	1.72134e-14	protein_coding	Cyp6a2
FBgn0000477	-0.0409752	0.876466	0.926072	protein_coding	DNaseII
FBgn0000479	-0.550159	0.000633958	0.00355801	protein_coding	dnc
FBgn0000482	-0.0369141	0.700374	0.808004	protein_coding	dor
FBgn0000489	0.49724	0.136789	0.26253	protein_coding	Pka-C3
FBgn0000490	0.473654	0.0255054	0.0737903	protein_coding	dpp
FBgn0000499	0.0954506	0.373401	0.536079	protein_coding	dsh
FBgn0000504	0.0762123	0.693369	0.802699	protein_coding	dsx
FBgn0000520	-0.111522	0.385631	0.54791	protein_coding	dwg
FBgn0000524	0.201898	0.163892	0.301297	protein_coding	dx
FBgn0000533	-0.600946	0.101945	0.211382	protein_coding	ea
FBgn0000536	0.324904	0.00186001	0.00876417	protein_coding	eas
FBgn0000541	-0.0467761	0.640807	0.764977	protein_coding	E(bx)
FBgn0000542	-1.17442	0.000406253	0.00239823	protein_coding	ec
FBgn0000543	-0.227236	0.122465	0.242104	protein_coding	ecd
FBgn0000546	-0.404926	0.0160291	0.0510907	protein_coding	EcR
FBgn0000547	-0.0710388	0.741031	0.837224	protein_coding	ed
FBgn0000557	-1.64266	7.70364e-06	7.80307e-05	protein_coding	eEF1alpha2
FBgn0000559	-0.517388	4.74661e-06	5.13063e-05	protein_coding	eEF2
FBgn0000562	0.114701	0.14051	0.267582	protein_coding	egl
FBgn0000565	0.457039	0.051042	0.126608	protein_coding	MsrA
FBgn0000566	0.0448836	0.633176	0.759935	protein_coding	Eip55E
FBgn0000567	0.337959	0.00524562	0.0204974	protein_coding	Eip74EF
FBgn0000568	0.0302168	0.854322	0.912038	protein_coding	Eip75B
FBgn0000575	-0.130778	0.344505	0.509798	protein_coding	emc
FBgn0000578	0.83806	1.53703e-07	2.43469e-06	protein_coding	ena
FBgn0000579	-0.23696	0.0374639	0.10005	protein_coding	Eno
FBgn0000581	-0.266716	0.0369117	0.0988014	protein_coding	E(Pc)
FBgn0000588	0.294721	0.309925	0.473868	protein_coding	esc
FBgn0000592	0.531032	0.108672	0.221205	protein_coding	Est-6
FBgn0000611	-0.122248	0.103397	0.213539	protein_coding	exd
FBgn0000615	0.313321	0.0330541	0.0908187	protein_coding	exu
FBgn0000617	0.0222763	0.894649	0.936989	protein_coding	e(y)1
FBgn0000618	0.283776	0.149596	0.281045	protein_coding	e(y)2
FBgn0000629	-0.310098	0.00984164	0.034079	protein_coding	E(z)
FBgn0000633	0.0191042	0.953598	0.972973	protein_coding	CG17716
FBgn0000635	0.743875	4.40919e-10	1.31979e-08	protein_coding	Fas2
FBgn0000636	0.600718	0.000152391	0.00104186	protein_coding	Fas3
FBgn0000644	0.212643	0.540083	0.685397	protein_coding	Fcp3C
FBgn0000659	0.371408	0.0539667	0.132213	protein_coding	fkh
FBgn0000662	-0.0874138	0.32125	0.485462	protein_coding	fl(2)d
FBgn0000667	0.220081	0.164968	0.302739	protein_coding	Actn
FBgn0000709	0.410604	0.00129831	0.00643913	protein_coding	fliI
FBgn0000711	0.543551	9.65675e-06	9.49309e-05	protein_coding	flw
FBgn0000719	0.621994	5.17869e-05	0.000410907	protein_coding	fog
FBgn0000721	-0.676084	2.44403e-08	4.73544e-07	protein_coding	for
FBgn0000723	-0.436813	0.00105739	0.00541391	protein_coding	FER
FBgn0000810	-0.20876	0.290769	0.453035	protein_coding	fs(1)K10
FBgn0000927	-0.0360798	0.915514	0.949968	protein_coding	fs(1)Ya
FBgn0000996	0.406207	0.016175	0.0514364	protein_coding	dup
FBgn0001075	-0.0689254	0.840208	0.90192	protein_coding	ft
FBgn0001078	-0.384599	0.00531674	0.0207108	protein_coding	ftz-f1
FBgn0001079	-0.0598595	0.796648	0.87415	protein_coding	fu
FBgn0001084	-0.688111	0.0249581	0.072589	protein_coding	fy
FBgn0001085	-0.73035	0.00520908	0.0203973	protein_coding	fz
FBgn0001086	0.547381	0.0630503	0.148699	protein_coding	fzy
FBgn0001087	-0.286226	0.00688775	0.0256478	protein_coding	g
FBgn0001089	-0.510643	0.0452675	0.11538	protein_coding	Gal
FBgn0001090	-0.340313	0.268936	0.428893	protein_coding	bnb
FBgn0001091	-0.103457	0.330104	0.493807	protein_coding	Gapdh1
FBgn0001092	-0.114162	0.315942	0.480239	protein_coding	Gapdh2
FBgn0001098	-0.435572	0.0438095	0.112741	protein_coding	Gdh
FBgn0001099	-0.268308	0.338311	0.502701	protein_coding	gdl
FBgn0001104	0.641727	5.06623e-14	3.72547e-12	protein_coding	Galphai
FBgn0001105	0.368537	3.02316e-09	7.27662e-08	protein_coding	Gbeta13F
FBgn0001108	0.249704	0.00276471	0.0121504	protein_coding	DCTN1-p150
FBgn0001112	0.187768	0.530666	0.676664	protein_coding	Gld
FBgn0001114	-0.639941	0.0525054	0.129379	protein_coding	Glt
FBgn0001122	0.479395	0.00051089	0.00295248	protein_coding	Galphao
FBgn0001123	0.115603	0.118744	0.236552	protein_coding	Galphas
FBgn0001124	0.385525	5.53415e-05	0.00043468	protein_coding	Got1
FBgn0001125	-0.0781721	0.539686	0.685339	protein_coding	Got2
FBgn0001128	-0.253235	0.0532007	0.130748	protein_coding	Gpdh1
FBgn0001133	-0.085447	0.468256	0.624631	protein_coding	grau
FBgn0001134	-0.55686	0.0308474	0.0859694	protein_coding	Grd
FBgn0001137	-0.00377782	0.991121	0.994742	protein_coding	grk
FBgn0001139	-0.00194586	0.980436	0.9888	protein_coding	gro
FBgn0001142	-0.811399	9.18883e-06	9.10982e-05	protein_coding	Gs1
FBgn0001145	-1.15835	1.44023e-09	3.72586e-08	protein_coding	Gs2
FBgn0001149	1.68064	2.15245e-48	4.02034e-45	protein_coding	GstD1
FBgn0001168	0.152646	0.328347	0.492142	protein_coding	h
FBgn0001169	-0.215405	0.0774296	0.172629	protein_coding	H
FBgn0001170	0.565373	0.036012	0.097005	protein_coding	H2.0
FBgn0001179	0.367445	0.0309258	0.0860596	protein_coding	hay
FBgn0001180	0.687861	0.0445955	0.114135	protein_coding	hb
FBgn0001185	-0.140867	0.313983	0.478116	protein_coding	her
FBgn0001186	0.829971	1.32344e-07	2.12365e-06	protein_coding	Hex-A
FBgn0001187	0.44067	0.103538	0.213736	protein_coding	Hex-C
FBgn0001189	0.0446253	0.698418	0.806709	protein_coding	hfw
FBgn0001197	0.356162	0.00181438	0.0085708	protein_coding	His2Av
FBgn0001202	0.279533	0.00146827	0.00713435	protein_coding	hook
FBgn0001206	0.0491566	0.847111	0.906516	protein_coding	Hmr
FBgn0001208	-0.654143	0.0800458	0.177013	protein_coding	Hn
FBgn0001215	0.00648573	0.950797	0.97118	protein_coding	Hrb98DE
FBgn0001216	-0.663076	0.0953096	0.201992	protein_coding	Hsc70-1
FBgn0001217	0.843684	0.00387233	0.0160514	protein_coding	Hsc70-2
FBgn0001218	-0.188383	0.128829	0.251334	protein_coding	Hsc70-3
FBgn0001220	0.138955	0.078461	0.174252	protein_coding	Hsc70-5
FBgn0001222	-0.100468	0.34785	0.512959	protein_coding	Hsf
FBgn0001223	0.984467	0.000725932	0.00397397	protein_coding	Hsp22
FBgn0001224	1.52131	6.01977e-07	8.2191e-06	protein_coding	Hsp23
FBgn0001225	1.55826	1.88665e-07	2.92195e-06	protein_coding	Hsp26
FBgn0001226	1.23169	9.38024e-05	0.000689801	protein_coding	Hsp27
FBgn0001228	1.19447	0.000352894	0.00213605	protein_coding	CG4456
FBgn0001230	1.42625	1.87389e-06	2.22934e-05	protein_coding	Hsp68
FBgn0001233	-0.279188	0.348595	0.513622	protein_coding	Hsp83
FBgn0001234	0.177873	0.459386	0.615436	ncRNA	lncRNA:Hsromega
FBgn0001235	0.00092847	0.996469	0.998034	protein_coding	hth
FBgn0001247	0.0222442	0.813075	0.88402	protein_coding	Ide
FBgn0001248	-0.411294	0.0062281	0.0236344	protein_coding	Idh
FBgn0001250	-0.107231	0.667785	0.784853	protein_coding	if
FBgn0001255	-0.294756	0.401513	0.562431	protein_coding	ImpE3
FBgn0001257	0.92558	0.0010544	0.00540454	protein_coding	ImpL2
FBgn0001258	0.403309	0.0401416	0.105304	protein_coding	Ldh
FBgn0001259	-0.0990648	0.756762	0.848494	protein_coding	in
FBgn0001276	-0.250863	0.30143	0.464575	protein_coding	ix
FBgn0001280	-0.0135274	0.911566	0.946954	protein_coding	janA
FBgn0001285	-0.510878	0.0400872	0.10522	protein_coding	Jon44E
FBgn0001291	0.440109	0.00609493	0.0232139	protein_coding	Jra
FBgn0001296	-0.123903	0.566486	0.706655	protein_coding	kar
FBgn0001297	0.390711	0.105793	0.21719	protein_coding	kay
FBgn0001301	0.327424	0.0163384	0.0518113	protein_coding	kel
FBgn0001308	0.368991	0.000702623	0.00387868	protein_coding	Khc
FBgn0001316	0.0367781	0.802901	0.879153	protein_coding	klar
FBgn0001320	-0.99993	0.00034856	0.00211749	protein_coding	kni
FBgn0001321	-0.493517	0.177444	0.31731	protein_coding	knk
FBgn0001323	-1.00916	0.000387065	0.00229803	protein_coding	knrl
FBgn0001324	-0.096644	0.299213	0.462069	protein_coding	kto
FBgn0001330	-0.377126	0.0621069	0.147063	protein_coding	kz
FBgn0001341	-0.322526	0.045804	0.116462	protein_coding	Mybbp1A
FBgn0001404	-0.188274	0.0551363	0.134478	protein_coding	egh
FBgn0001491	0.230041	0.0479147	0.120424	protein_coding	l(1)10Bb
FBgn0001565	-0.350958	0.0109181	0.0370242	protein_coding	Hlc
FBgn0001612	0.0847523	0.673974	0.789696	protein_coding	Grip91
FBgn0001624	0.0519006	0.560696	0.7021	protein_coding	dlg1
FBgn0001941	0.407253	3.50628e-06	3.92627e-05	protein_coding	ifc
FBgn0001942	-0.621395	2.76596e-07	4.05515e-06	protein_coding	eIF4A
FBgn0001961	0.617492	7.45032e-09	1.65699e-07	protein_coding	Arpc1
FBgn0001965	-0.051344	0.645301	0.768486	protein_coding	Sos
FBgn0001970	0.0167147	0.936667	0.962748	protein_coding	Pgant35A
FBgn0001977	0.487989	6.07711e-05	0.000471379	protein_coding	CIAPIN1
FBgn0001978	0.00890561	0.939423	0.964238	protein_coding	stc
FBgn0001981	0.513023	0.00600736	0.0229272	protein_coding	esg
FBgn0001986	-0.536313	0.000111922	0.000801562	protein_coding	Mtr4
FBgn0001987	0.875149	3.08258e-12	1.55114e-10	protein_coding	Gli
FBgn0001989	-0.126	0.28357	0.445166	protein_coding	ND-B17
FBgn0001990	-0.182836	0.313605	0.477619	protein_coding	wek
FBgn0001991	0.297009	0.114266	0.229717	protein_coding	Ca-alpha1D
FBgn0001992	0.139334	0.490965	0.643345	protein_coding	Cyp303a1
FBgn0001994	0.0195098	0.828946	0.894435	protein_coding	crp
FBgn0001995	-0.263819	0.0163828	0.0518818	protein_coding	mRpL4
FBgn0002021	0.0281834	0.794258	0.872655	protein_coding	l(2)37Bb
FBgn0002022	-0.539084	2.37527e-06	2.75904e-05	protein_coding	Catsup
FBgn0002023	-1.24168	1.77524e-06	2.13097e-05	protein_coding	Lim3
FBgn0002031	-0.0194414	0.80487	0.880153	protein_coding	l(2)37Cc
FBgn0002036	-0.225674	0.115215	0.231148	protein_coding	CG10561
FBgn0002044	-0.0849793	0.456121	0.612864	protein_coding	swm
FBgn0002069	0.207094	0.012257	0.0408231	protein_coding	AspRS
FBgn0002121	0.402102	0.000401063	0.00237308	protein_coding	l(2)gl
FBgn0002174	0.0526935	0.574608	0.713315	protein_coding	CG5504
FBgn0002183	-0.0111215	0.910383	0.946417	protein_coding	dre4
FBgn0002283	0.212049	0.173669	0.313046	protein_coding	l(3)73Ah
FBgn0002284	0.31147	0.00109653	0.00557455	protein_coding	Prosbeta6
FBgn0002306	-1.07269	0.00017009	0.00114774	protein_coding	sas
FBgn0002354	0.0333881	0.827152	0.893037	protein_coding	l(3)87Df
FBgn0002413	0.158343	0.0260902	0.0751563	protein_coding	dco
FBgn0002431	0.00223823	0.975018	0.985683	protein_coding	hyd
FBgn0002441	-0.0701631	0.531326	0.677229	protein_coding	l(3)mbt
FBgn0002466	1.13399	0.000147899	0.00101486	protein_coding	sti
FBgn0002521	0.348231	0.00108073	0.00551223	protein_coding	pho
FBgn0002522	-0.580922	0.000111482	0.000800254	protein_coding	lab
FBgn0002524	0.0825457	0.633167	0.759935	protein_coding	lace
FBgn0002525	0.297383	0.0404669	0.106038	protein_coding	Lam
FBgn0002526	0.810491	5.97353e-10	1.73791e-08	protein_coding	LanA
FBgn0002542	0.301437	0.0669214	0.155202	protein_coding	lds
FBgn0002543	0.817625	1.5906e-08	3.2937e-07	protein_coding	robo2
FBgn0002552	-0.344737	0.0180801	0.0561336	protein_coding	lin
FBgn0002564	0.54242	0.0996204	0.208087	protein_coding	Lsp1gamma
FBgn0002565	-0.196887	0.507909	0.656703	protein_coding	Lsp2
FBgn0002566	0.0775588	0.428708	0.586709	protein_coding	lt
FBgn0002567	-0.49266	0.0168955	0.0530377	protein_coding	Rab32
FBgn0002569	0.776423	7.55925e-06	7.68181e-05	protein_coding	Mal-A2
FBgn0002570	0.7347	0.000252754	0.00161234	protein_coding	Mal-A1
FBgn0002571	0.930105	0.000754953	0.00410225	protein_coding	Mal-A3
FBgn0002578	-0.52013	0.00952482	0.0331664	protein_coding	Kaz-m1
FBgn0002579	-0.487778	3.07224e-07	4.46215e-06	protein_coding	RpL36
FBgn0002590	-0.656723	4.9553e-07	6.92777e-06	protein_coding	RpS5a
FBgn0002593	-0.597012	2.61284e-06	3.01623e-05	protein_coding	RpLP1
FBgn0002609	1.08674	3.72091e-05	0.00030916	protein_coding	E(spl)m3-HLH
FBgn0002622	-0.558664	3.79754e-07	5.4478e-06	protein_coding	RpS3
FBgn0002626	-0.531607	1.01086e-05	9.86459e-05	protein_coding	RpL32
FBgn0002638	-0.0940554	0.476986	0.63257	protein_coding	Rcc1
FBgn0002641	1.16309	2.40584e-09	5.91267e-08	protein_coding	mal
FBgn0002643	-0.367972	0.0296387	0.083322	protein_coding	mam
FBgn0002645	0.424187	7.96326e-16	7.99666e-14	protein_coding	Map205
FBgn0002673	0.784295	0.01324	0.0435995	protein_coding	twe
FBgn0002707	0.320227	0.0471521	0.119079	protein_coding	mei-9
FBgn0002709	-0.317479	0.149485	0.280894	protein_coding	mei-218
FBgn0002715	0.258233	0.361988	0.525918	protein_coding	mei-S332
FBgn0002716	0.31344	0.383034	0.545335	protein_coding	mei-W68
FBgn0002719	0.593296	0.00105202	0.00539824	protein_coding	Men
FBgn0002723	-0.248135	0.110781	0.224373	protein_coding	Met
FBgn0002732	1.50029	1.494e-10	5.03698e-09	protein_coding	E(spl)malpha-BFM
FBgn0002733	0.935897	0.00010795	0.000779091	protein_coding	E(spl)mbeta-HLH
FBgn0002736	0.268447	0.0366338	0.0982266	protein_coding	mago
FBgn0002772	0.111722	0.539266	0.685208	protein_coding	Mlc1
FBgn0002773	0.239831	0.15555	0.289609	protein_coding	Mlc2
FBgn0002774	-0.154246	0.281101	0.442325	protein_coding	mle
FBgn0002775	-0.28786	0.0555816	0.135203	protein_coding	msl-3
FBgn0002778	0.580379	0.0619972	0.146952	protein_coding	mnd
FBgn0002780	-0.283541	0.0272862	0.0778808	protein_coding	mod
FBgn0002781	0.0504368	0.680991	0.794475	protein_coding	mod(mdg4)
FBgn0002783	-0.117523	0.238656	0.39427	protein_coding	mor
FBgn0002787	0.238938	0.0069199	0.0257162	protein_coding	Rpn8
FBgn0002789	0.628006	0.00294728	0.0128141	protein_coding	Mp20
FBgn0002791	-0.119433	0.455007	0.611675	protein_coding	mr
FBgn0002868	-2.00086	1.05946e-13	7.43929e-12	protein_coding	MtnA
FBgn0002869	-0.220398	0.330197	0.493867	protein_coding	MtnB
FBgn0002872	0.334342	0.0958667	0.202465	protein_coding	mu2
FBgn0002873	0.725321	0.00805058	0.0290399	protein_coding	mud
FBgn0002878	0.540177	0.0201075	0.0607911	protein_coding	mus101
FBgn0002887	0.163166	0.405448	0.566161	protein_coding	mus201
FBgn0002891	0.571912	0.00017998	0.00120254	protein_coding	DNApol-zeta
FBgn0002899	0.295746	0.255268	0.413252	protein_coding	mus301
FBgn0002901	-0.0938547	0.632248	0.75943	protein_coding	mus304
FBgn0002905	-0.110135	0.653981	0.774253	protein_coding	DNApol-theta
FBgn0002906	-0.108365	0.67615	0.791085	protein_coding	Blm
FBgn0002909	-0.116758	0.38763	0.549773	protein_coding	mus312
FBgn0002914	-0.102047	0.337068	0.501574	protein_coding	Myb
FBgn0002921	0.108612	0.629715	0.757751	protein_coding	Atpalpha
FBgn0002922	-0.189481	0.56866	0.708107	protein_coding	nau
FBgn0002924	0.301339	0.152797	0.285451	protein_coding	ncd
FBgn0002930	-0.824551	0.0103759	0.0354297	protein_coding	nec
FBgn0002931	-0.990054	0.0028845	0.0125763	protein_coding	net
FBgn0002932	0.351948	0.0325045	0.089572	protein_coding	neur
FBgn0002939	-3.31681	7.60467e-35	7.102e-32	protein_coding	ninaD
FBgn0002940	-1.23679	0.00241631	0.010849	protein_coding	ninaE
FBgn0002945	-0.610455	0.0170857	0.0535807	protein_coding	nkd
FBgn0002948	-0.267592	0.443574	0.601536	protein_coding	nod
FBgn0002973	0.578913	0.00032754	0.00200847	protein_coding	numb
FBgn0002985	-0.90508	0.00151114	0.0073198	protein_coding	odd
FBgn0002989	0.114778	0.513255	0.661143	protein_coding	okr
FBgn0003008	0.32016	0.0226374	0.0668599	protein_coding	or
FBgn0003015	-0.743468	0.0309784	0.0861804	protein_coding	osk
FBgn0003016	-0.23012	0.149093	0.280328	protein_coding	osp
FBgn0003023	0.902137	0.00961618	0.0334222	protein_coding	otu
FBgn0003028	-0.717759	0.040304	0.105671	protein_coding	ovo
FBgn0003041	1.02516	3.5791e-08	6.57976e-07	protein_coding	pbl
FBgn0003042	-0.0504969	0.800135	0.877153	protein_coding	Pc
FBgn0003044	-0.00474126	0.976466	0.986137	protein_coding	Pcl
FBgn0003046	-0.266571	0.131984	0.256203	protein_coding	Pcp
FBgn0003048	0.347558	0.00973396	0.0337918	protein_coding	pcx
FBgn0003053	0.165148	0.108119	0.220453	protein_coding	peb
FBgn0003062	-0.152852	0.20877	0.357592	protein_coding	Fib
FBgn0003067	-0.254093	0.436142	0.593751	protein_coding	Pepck1
FBgn0003068	0.210888	0.271112	0.431305	protein_coding	per
FBgn0003071	-0.279191	0.0486725	0.121929	protein_coding	Pfk
FBgn0003074	-0.536386	0.000509123	0.00294409	protein_coding	Pgi
FBgn0003076	0.426407	0.117177	0.23439	protein_coding	Pgm1
FBgn0003079	-0.0471335	0.712633	0.817101	protein_coding	Raf
FBgn0003082	0.406882	0.0346347	0.0940477	protein_coding	phr
FBgn0003090	-0.454992	0.0834776	0.182618	protein_coding	pk
FBgn0003091	-0.0888932	0.783298	0.866527	protein_coding	Pkc53E
FBgn0003093	0.110171	0.416413	0.575986	protein_coding	Pkc98E
FBgn0003116	-0.0126832	0.928056	0.95765	protein_coding	pn
FBgn0003118	0.391966	0.00701199	0.0259861	protein_coding	pnt
FBgn0003124	0.537859	0.0678033	0.156427	protein_coding	polo
FBgn0003130	0.119088	0.730707	0.829775	protein_coding	Poxn
FBgn0003134	-0.0995095	0.465727	0.622206	protein_coding	Pp1alpha-96A
FBgn0003137	0.449209	0.010695	0.0363466	protein_coding	Ppn
FBgn0003139	-0.368834	7.59525e-06	7.71001e-05	protein_coding	PpV
FBgn0003141	-0.171212	0.0975174	0.204978	protein_coding	pr
FBgn0003149	0.562351	0.017434	0.054433	protein_coding	Prm
FBgn0003159	-0.388696	0.000216559	0.00140888	protein_coding	CG2841
FBgn0003162	-1.31032	9.55095e-06	9.41883e-05	protein_coding	Pu
FBgn0003165	-0.164018	0.362095	0.525992	protein_coding	pum
FBgn0003169	0.0780394	0.517609	0.6651	protein_coding	put
FBgn0003175	-0.380519	0.0100285	0.0345851	protein_coding	px
FBgn0003187	-0.147537	0.658927	0.777876	protein_coding	qua
FBgn0003189	-0.453302	0.0587545	0.14131	protein_coding	r
FBgn0003204	-0.194795	0.0810504	0.178437	protein_coding	ras
FBgn0003205	0.451438	3.06522e-07	4.45889e-06	protein_coding	Ras85D
FBgn0003206	0.354469	0.0173471	0.0542366	protein_coding	Ras64B
FBgn0003209	0.166178	0.4092	0.569951	protein_coding	raw
FBgn0003210	-0.0834654	0.53121	0.677173	protein_coding	rb
FBgn0003218	-0.00284972	0.989694	0.99363	protein_coding	rdgB
FBgn0003227	0.0431265	0.889499	0.934634	protein_coding	rec
FBgn0003231	0.826129	3.78211e-14	2.89517e-12	protein_coding	ref(2)P
FBgn0003256	0.0409238	0.752754	0.846408	protein_coding	rl
FBgn0003257	-0.121168	0.572187	0.71135	protein_coding	r-l
FBgn0003261	-0.060188	0.670255	0.786865	protein_coding	Rm62
FBgn0003268	0.0865058	0.708739	0.813669	protein_coding	rod
FBgn0003274	-0.436517	0.000134163	0.000935736	protein_coding	RpLP2
FBgn0003275	-0.215649	0.17875	0.319242	protein_coding	RpII18
FBgn0003277	-0.0639017	0.473576	0.629391	protein_coding	RpII215
FBgn0003278	-0.45281	0.0183342	0.0567714	protein_coding	RpI135
FBgn0003279	-0.838359	2.56004e-09	6.27512e-08	protein_coding	RpL4
FBgn0003301	-0.870269	0.000238667	0.00153824	protein_coding	rut
FBgn0003302	-0.0250994	0.925767	0.95668	protein_coding	rux
FBgn0003308	-0.342829	0.101238	0.21043	protein_coding	ry
FBgn0003310	0.282869	0.0165273	0.0521798	protein_coding	S
FBgn0003317	0.154263	0.229776	0.383536	protein_coding	sax
FBgn0003321	-0.420897	0.00072829	0.00398448	protein_coding	sbr
FBgn0003328	0.846025	5.02422e-11	1.89072e-09	NA	NA
FBgn0003330	-0.101077	0.480884	0.635215	protein_coding	Sce
FBgn0003334	-0.304237	0.00298402	0.0129437	protein_coding	Scm
FBgn0003345	0.124049	0.0705674	0.161	protein_coding	sd
FBgn0003346	0.539304	7.7712e-05	0.000585757	protein_coding	RanGAP
FBgn0003353	0.288625	0.295328	0.457847	protein_coding	sei
FBgn0003356	-1.13274	0.000308118	0.00191197	protein_coding	Jon99Cii
FBgn0003357	-1.09536	0.00195608	0.0091222	protein_coding	Jon99Ciii
FBgn0003358	-0.536018	0.150298	0.281798	protein_coding	Jon99Ci
FBgn0003360	-0.14979	0.212355	0.362027	protein_coding	sesB
FBgn0003366	-0.42142	0.248572	0.405487	protein_coding	sev
FBgn0003371	0.377447	2.08529e-05	0.000187436	protein_coding	sgg
FBgn0003380	0.434052	0.179866	0.320444	protein_coding	Sh
FBgn0003386	0.283977	0.191541	0.335736	protein_coding	Shaw
FBgn0003388	-0.121106	0.72715	0.827446	protein_coding	shd
FBgn0003390	-0.571025	0.00421948	0.0172378	protein_coding	shf
FBgn0003391	0.387582	0.000176559	0.00118539	protein_coding	shg
FBgn0003392	0.195539	0.00306395	0.0132341	protein_coding	shi
FBgn0003396	0.171883	0.238145	0.393565	protein_coding	shn
FBgn0003401	0.751294	0.0265888	0.0763805	protein_coding	shu
FBgn0003410	0.121847	0.350183	0.514915	protein_coding	sina
FBgn0003415	-0.0825852	0.59943	0.732061	protein_coding	skd
FBgn0003416	0.103513	0.265895	0.424988	protein_coding	sl
FBgn0003423	-0.465056	0.203144	0.351066	protein_coding	slgA
FBgn0003429	-1.25993	5.58701e-07	7.6731e-06	protein_coding	slo
FBgn0003435	-0.165058	0.356291	0.520802	protein_coding	sm
FBgn0003444	-0.487911	0.010369	0.0354297	protein_coding	smo
FBgn0003447	-0.370787	0.0647453	0.151657	protein_coding	sn
FBgn0003449	-0.0236796	0.823181	0.890589	protein_coding	snf
FBgn0003459	0.0405357	0.785703	0.868135	protein_coding	stwl
FBgn0003460	0.354523	0.308534	0.472593	protein_coding	so
FBgn0003462	-0.317143	5.10409e-05	0.000405483	protein_coding	Sod1
FBgn0003463	-0.599684	0.00116125	0.0058526	protein_coding	sog
FBgn0003464	0.174178	0.0850754	0.185399	protein_coding	sol
FBgn0003475	-0.114001	0.169716	0.30907	protein_coding	spir
FBgn0003479	0.0676706	0.754956	0.847062	protein_coding	spn-A
FBgn0003480	-0.247808	0.430658	0.588343	protein_coding	spn-B
FBgn0003483	0.821812	0.00639564	0.0241037	protein_coding	spn-E
FBgn0003495	-0.743784	0.016522	0.0521798	protein_coding	spz
FBgn0003499	-0.154009	0.665164	0.783349	protein_coding	sr
FBgn0003502	-0.343619	0.0144522	0.0468896	protein_coding	Btk29A
FBgn0003507	-0.977235	1.06719e-05	0.000103494	protein_coding	srp
FBgn0003510	0.532627	0.130958	0.254742	protein_coding	Sry-alpha
FBgn0003511	-0.37921	0.052314	0.129078	protein_coding	Sry-beta
FBgn0003512	-0.178637	0.123509	0.243755	protein_coding	Sry-delta
FBgn0003514	0.638438	3.41316e-09	8.06975e-08	protein_coding	sqh
FBgn0003515	0.549347	0.0612007	0.145879	protein_coding	st
FBgn0003517	-0.91995	3.32196e-10	1.03759e-08	protein_coding	sta
FBgn0003520	-0.0768529	0.515779	0.663205	protein_coding	stau
FBgn0003525	-0.204205	0.558306	0.700546	protein_coding	stg
FBgn0003545	1.12269	0.000975598	0.00509	protein_coding	sub
FBgn0003557	0.1199	0.3015	0.464575	protein_coding	Su(dx)
FBgn0003559	-0.0770102	0.494362	0.646123	protein_coding	su(f)
FBgn0003567	0.120902	0.433902	0.591218	protein_coding	su(Hw)
FBgn0003575	0.0276894	0.804379	0.879842	protein_coding	su(sable)
FBgn0003598	-0.0918084	0.511651	0.659713	protein_coding	Su(var)3-7
FBgn0003607	-0.0564206	0.479842	0.634288	protein_coding	Su(var)205
FBgn0003612	-0.0697766	0.56819	0.70791	protein_coding	Su(var)2-10
FBgn0003638	-0.464043	3.36002e-05	0.000285266	protein_coding	su(w[a])
FBgn0003651	-0.664077	0.0582007	0.140195	protein_coding	svp
FBgn0003654	0.392665	3.12267e-06	3.53486e-05	protein_coding	sw
FBgn0003655	-0.589992	0.0959471	0.202589	protein_coding	swa
FBgn0003656	0.716254	4.17452e-06	4.58665e-05	protein_coding	sws
FBgn0003660	0.538393	1.3034e-08	2.78545e-07	protein_coding	Syb
FBgn0003676	0.301877	0.000159116	0.00107993	protein_coding	CCT1
FBgn0003687	-0.0901635	0.587923	0.724066	protein_coding	Tbp
FBgn0003701	0.539378	0.0946325	0.200949	protein_coding	thr
FBgn0003714	0.00722056	0.954675	0.973255	protein_coding	tko
FBgn0003716	-0.242241	0.0471358	0.119079	protein_coding	tkv
FBgn0003721	0.452961	9.24957e-07	1.19642e-05	protein_coding	Tm1
FBgn0003731	-0.0468174	0.769657	0.857634	protein_coding	Egfr
FBgn0003741	-0.119453	0.582306	0.719356	protein_coding	tra
FBgn0003742	0.00763831	0.954705	0.973255	protein_coding	tra2
FBgn0003744	0.282358	0.00025053	0.00160034	protein_coding	trc
FBgn0003748	0.318093	0.0615216	0.146193	protein_coding	Treh
FBgn0003862	-0.150682	0.220652	0.372568	protein_coding	trx
FBgn0003866	0.168425	0.449912	0.606886	protein_coding	tsh
FBgn0003867	-0.790168	0.00875755	0.0310622	protein_coding	tsl
FBgn0003870	0.117543	0.323804	0.487456	protein_coding	ttk
FBgn0003882	-0.288588	0.0374517	0.100046	protein_coding	tub
FBgn0003884	0.457895	5.61845e-05	0.00044056	protein_coding	alphaTub84B
FBgn0003885	0.214469	0.0178153	0.0554037	protein_coding	alphaTub84D
FBgn0003888	1.90305	3.3574e-16	3.76346e-14	protein_coding	betaTub60D
FBgn0003890	-0.0286463	0.790819	0.870618	protein_coding	betaTub97EF
FBgn0003891	-0.563027	7.21574e-06	7.37536e-05	protein_coding	tud
FBgn0003892	-0.296983	0.169086	0.308235	protein_coding	ptc
FBgn0003896	-1.25117	1.31037e-05	0.000124239	protein_coding	tup
FBgn0003941	-0.573783	2.9461e-06	3.35123e-05	protein_coding	RpL40
FBgn0003942	-0.482762	5.90064e-06	6.17089e-05	protein_coding	RpS27A
FBgn0003943	0.72822	2.7711e-08	5.30741e-07	protein_coding	Ubi-p63E
FBgn0003944	-0.550352	0.086021	0.186782	protein_coding	Ubx
FBgn0003961	0.473251	0.0263219	0.0757303	protein_coding	Uro
FBgn0003963	-0.427777	0.029847	0.0837311	protein_coding	ush
FBgn0003964	0.072751	0.495052	0.646434	protein_coding	usp
FBgn0003969	0.870116	2.82707e-08	5.38433e-07	protein_coding	vap
FBgn0003977	-0.150186	0.202314	0.350001	protein_coding	vir
FBgn0003978	0.237725	0.231707	0.386068	protein_coding	vls
FBgn0003984	1.15766	0.000152196	0.00104132	protein_coding	vn
FBgn0003996	0.707264	1.26985e-05	0.000121135	protein_coding	w
FBgn0003997	0.000412532	0.998099	0.998527	protein_coding	hid
FBgn0004003	-0.559024	0.101491	0.210741	protein_coding	wbl
FBgn0004045	-0.168707	0.634227	0.760633	protein_coding	Yp1
FBgn0004047	-0.186063	0.597298	0.730422	protein_coding	Yp3
FBgn0004049	0.279772	0.00629447	0.0238475	protein_coding	yrt
FBgn0004050	0.188202	0.140507	0.267582	protein_coding	z
FBgn0004055	-0.844138	5.02612e-05	0.000400845	protein_coding	uzip
FBgn0004057	-1.05077	2.19827e-08	4.31295e-07	protein_coding	Zw
FBgn0004066	0.487632	6.73332e-05	0.000514586	protein_coding	Prosalpha4
FBgn0004087	-0.222495	0.211306	0.360699	protein_coding	Dhfr
FBgn0004101	0.0413314	0.775736	0.861735	protein_coding	bs
FBgn0004103	0.20331	0.00239252	0.0107648	protein_coding	Pp1-87B
FBgn0004106	0.918037	0.00714976	0.0264547	protein_coding	Cdk1
FBgn0004107	0.300769	0.282708	0.444255	protein_coding	Cdk2
FBgn0004108	-0.115326	0.636865	0.762328	protein_coding	Nrt
FBgn0004117	0.278221	0.191353	0.335469	protein_coding	Tm2
FBgn0004132	-0.0543141	0.667287	0.784487	protein_coding	boca
FBgn0004133	-0.408987	0.272544	0.432652	protein_coding	blow
FBgn0004167	0.35818	0.0155451	0.0499391	protein_coding	kst
FBgn0004168	-0.736564	0.0363933	0.0978345	protein_coding	5-HT1A
FBgn0004169	0.39116	0.059887	0.14337	protein_coding	up
FBgn0004170	0.566407	0.0590122	0.141849	protein_coding	sc
FBgn0004177	0.15996	0.00109788	0.00557838	protein_coding	mts
FBgn0004179	0.14024	0.118741	0.236552	protein_coding	Csp
FBgn0004197	-1.30989	3.47828e-09	8.20274e-08	protein_coding	Ser
FBgn0004198	0.605265	0.0665351	0.154608	protein_coding	ct
FBgn0004227	-0.105363	0.23797	0.393416	protein_coding	nonA
FBgn0004228	0.702387	3.34281e-05	0.000284063	protein_coding	mex1
FBgn0004237	0.311215	0.00886455	0.0313821	protein_coding	Hrb87F
FBgn0004240	0.866729	6.63405e-05	0.000508665	protein_coding	DptA
FBgn0004242	-0.216364	0.4167	0.576158	protein_coding	Syt1
FBgn0004359	0.314751	0.342264	0.507205	protein_coding	T48
FBgn0004362	0.860102	2.5903e-11	1.05637e-09	protein_coding	HmgD
FBgn0004363	0.270366	0.00171047	0.00815006	protein_coding	porin
FBgn0004364	-1.03713	2.18995e-09	5.45385e-08	protein_coding	18w
FBgn0004367	-0.632593	0.00493102	0.0195379	protein_coding	mei-41
FBgn0004368	-0.00533549	0.978558	0.987563	protein_coding	Ptp4E
FBgn0004369	-0.394127	0.00846865	0.0302211	protein_coding	Ptp99A
FBgn0004370	-0.54835	0.0526128	0.129576	protein_coding	Ptp10D
FBgn0004373	0.0838087	0.600244	0.732769	protein_coding	fwd
FBgn0004374	0.0778763	0.728107	0.828233	protein_coding	neb
FBgn0004378	0.764588	0.00455852	0.0183658	protein_coding	Klp61F
FBgn0004379	0.386359	0.205311	0.353698	protein_coding	Klp67A
FBgn0004380	0.236787	0.0570716	0.138045	protein_coding	Klp64D
FBgn0004381	1.04091	7.58731e-11	2.74643e-09	protein_coding	Klp68D
FBgn0004387	0.372601	0.0214759	0.0640983	protein_coding	Klp98A
FBgn0004390	0.128161	0.513833	0.661522	protein_coding	RasGAP1
FBgn0004391	0.129882	0.381135	0.543174	protein_coding	shtd
FBgn0004394	0.340564	0.0724745	0.164222	protein_coding	pdm2
FBgn0004395	0.474579	7.82633e-05	0.000588961	protein_coding	unk
FBgn0004396	-0.652844	1.77088e-07	2.77023e-06	protein_coding	CrebA
FBgn0004397	0.794524	7.24279e-10	2.04774e-08	protein_coding	Vinc
FBgn0004401	0.00942805	0.921126	0.953597	protein_coding	Pep
FBgn0004403	-0.499572	0.000170761	0.00115143	protein_coding	RpS14a
FBgn0004404	-0.619878	2.32994e-08	4.55216e-07	protein_coding	RpS14b
FBgn0004406	0.151579	0.376459	0.539142	protein_coding	tam
FBgn0004407	0.223103	0.127645	0.249545	protein_coding	DNApol-gamma35
FBgn0004419	0.195163	0.0362139	0.0974924	protein_coding	me31B
FBgn0004425	-0.232303	0.501046	0.651201	protein_coding	LysB
FBgn0004426	0.0253568	0.94051	0.964575	pseudogene	LysC
FBgn0004427	-0.43738	0.101026	0.21013	protein_coding	LysD
FBgn0004428	-1.2977	0.00123285	0.00617017	protein_coding	LysE
FBgn0004429	0.746678	0.000651088	0.00364103	protein_coding	LysP
FBgn0004431	0.884308	0.0163678	0.0518668	protein_coding	LysX
FBgn0004432	0.295016	0.000963875	0.00503728	protein_coding	Cyp1
FBgn0004435	0.181887	0.0126771	0.0420873	protein_coding	Galphaq
FBgn0004436	0.442193	5.81076e-10	1.71188e-08	protein_coding	Ubc6
FBgn0004449	0.351121	0.0398032	0.104769	protein_coding	Ten-m
FBgn0004456	0.715566	4.16363e-11	1.59361e-09	protein_coding	mew
FBgn0004463	-0.353302	0.00945324	0.0329693	protein_coding	RpIII128
FBgn0004465	-0.078514	0.296326	0.458965	protein_coding	Su(P)
FBgn0004507	-0.433006	0.0248056	0.0722357	protein_coding	GlyP
FBgn0004509	0.558968	2.88037e-07	4.20966e-06	protein_coding	Fur1
FBgn0004510	0.200984	0.340058	0.504336	protein_coding	Ets97D
FBgn0004512	-0.030997	0.897521	0.938561	protein_coding	Mdr49
FBgn0004513	0.611034	0.0775967	0.172911	protein_coding	Mdr65
FBgn0004516	-0.705439	0.0471833	0.119093	protein_coding	Gad1
FBgn0004552	-2.52207	2.0301e-09	5.06929e-08	protein_coding	Akh
FBgn0004556	0.0164959	0.92863	0.95765	protein_coding	Dbp73D
FBgn0004569	0.663655	0.00409086	0.0167858	protein_coding	aos
FBgn0004573	-1.78303	4.81516e-08	8.6645e-07	protein_coding	5-HT7
FBgn0004574	0.506698	8.0953e-06	8.12925e-05	protein_coding	Rop
FBgn0004575	-1.16469	5.74264e-06	6.01914e-05	protein_coding	Syn
FBgn0004580	1.03396	3.85957e-05	0.000319544	protein_coding	Cbp53E
FBgn0004583	0.0494217	0.723206	0.824466	protein_coding	ex
FBgn0004584	0.86594	0.00011801	0.000836188	protein_coding	Rrp1
FBgn0004587	-0.0840684	0.325624	0.489202	protein_coding	B52
FBgn0004595	0.0898651	0.610834	0.742734	protein_coding	pros
FBgn0004597	0.262899	0.0315481	0.0874265	protein_coding	CycC
FBgn0004598	-0.202839	0.292965	0.455091	protein_coding	Fur2
FBgn0004606	-1.4284	0.000118947	0.000840275	protein_coding	zfh1
FBgn0004607	0.219459	0.491644	0.643874	protein_coding	zfh2
FBgn0004611	0.19673	0.297363	0.460238	protein_coding	Plc21C
FBgn0004620	-0.0222421	0.94699	0.968349	protein_coding	GluRIIA
FBgn0004622	-0.691406	0.0230993	0.0679877	protein_coding	TkR99D
FBgn0004629	-0.11717	0.452887	0.609527	protein_coding	Cys
FBgn0004635	0.975204	0.00128948	0.00640558	protein_coding	rho
FBgn0004636	0.211333	0.00472168	0.0188766	protein_coding	Rap1
FBgn0004638	0.230472	0.04471	0.114365	protein_coding	drk
FBgn0004643	-0.238505	0.0500632	0.124554	protein_coding	Zw10
FBgn0004644	0.280333	0.31464	0.478726	protein_coding	hh
FBgn0004646	-1.62856	2.36433e-12	1.2267e-10	protein_coding	ogre
FBgn0004647	0.530748	0.00324753	0.0139058	protein_coding	N
FBgn0004648	0.359067	3.93024e-05	0.000323673	protein_coding	svr
FBgn0004649	-0.536952	0.0637357	0.149874	protein_coding	yl
FBgn0004652	-0.601443	0.000931754	0.00489958	protein_coding	fru
FBgn0004654	-0.191136	0.07377	0.166571	protein_coding	Pgd
FBgn0004655	-0.0178249	0.885035	0.931937	protein_coding	wapl
FBgn0004656	0.0917713	0.368059	0.531597	protein_coding	fs(1)h
FBgn0004657	0.844518	4.11032e-08	7.48271e-07	protein_coding	mys
FBgn0004687	0.0642299	0.450061	0.606949	protein_coding	Mlc-c
FBgn0004698	-0.0601098	0.596098	0.729614	protein_coding	Xpc
FBgn0004795	-1.38813	1.369e-08	2.91233e-07	protein_coding	retn
FBgn0004797	-0.297406	0.139225	0.265913	protein_coding	mdy
FBgn0004811	-0.000947215	0.995289	0.997318	protein_coding	fs(2)ltoPP43
FBgn0004828	0.090263	0.150264	0.28179	protein_coding	His3.3B
FBgn0004832	-0.271798	0.189589	0.333128	protein_coding	Xpac
FBgn0004837	0.100595	0.723831	0.824876	protein_coding	Su(H)
FBgn0004838	-0.0129298	0.783555	0.866708	protein_coding	Hrb27C
FBgn0004839	-0.323505	0.206456	0.354795	protein_coding	otk
FBgn0004842	-0.328207	0.338364	0.502701	protein_coding	RYa-R
FBgn0004852	0.0341931	0.872362	0.923485	protein_coding	Ac76E
FBgn0004855	0.206508	0.0805409	0.177566	protein_coding	RpII15
FBgn0004856	-0.071687	0.41273	0.573214	protein_coding	Bx42
FBgn0004858	0.048333	0.754348	0.846924	protein_coding	elB
FBgn0004859	0.132105	0.671583	0.78783	protein_coding	ci
FBgn0004860	-0.305423	0.27803	0.438966	protein_coding	ph-d
FBgn0004861	-0.0462055	0.757179	0.848508	protein_coding	ph-p
FBgn0004864	0.00518827	0.969949	0.982681	protein_coding	hop
FBgn0004865	0.731647	0.00171872	0.008181	protein_coding	Eip78C
FBgn0004867	-0.779614	1.10784e-08	2.40607e-07	protein_coding	RpS2
FBgn0004868	0.474284	4.37442e-06	4.76139e-05	protein_coding	Gdi
FBgn0004870	-0.518896	0.0616206	0.146319	protein_coding	bab1
FBgn0004875	0.206929	0.0195659	0.0596565	protein_coding	enc
FBgn0004876	-0.448025	9.06574e-05	0.000670348	protein_coding	cdi
FBgn0004882	-0.600974	0.1015	0.210741	protein_coding	orb
FBgn0004885	0.190582	0.585557	0.722107	protein_coding	tok
FBgn0004888	0.0258483	0.804317	0.879842	protein_coding	Scsalpha1
FBgn0004889	-0.0352891	0.847271	0.906522	protein_coding	tws
FBgn0004892	-0.947104	0.000297741	0.00185993	protein_coding	sob
FBgn0004893	-0.407086	0.0220251	0.0654031	protein_coding	bowl
FBgn0004901	-0.224195	0.0379258	0.100937	protein_coding	Prat
FBgn0004903	-0.0553713	0.67509	0.790554	protein_coding	Rb97D
FBgn0004907	0.0134732	0.875084	0.925108	protein_coding	14-3-3zeta
FBgn0004908	0.207679	0.380796	0.542939	protein_coding	Arl2
FBgn0004910	0.023161	0.855128	0.912273	protein_coding	Eip63F-1
FBgn0004911	-0.310464	0.411533	0.572176	ncRNA	asRNA:Eig63F-2
FBgn0004913	-0.0778838	0.482113	0.6363	protein_coding	Gnf1
FBgn0004914	-0.158802	0.0739152	0.166731	protein_coding	Hnf4
FBgn0004915	0.162146	0.235894	0.390605	protein_coding	TfIIB
FBgn0004919	-0.314265	0.0728302	0.164888	protein_coding	gol
FBgn0004921	0.0720326	0.398463	0.558914	protein_coding	Ggamma1
FBgn0004924	-0.0473047	0.576952	0.715559	protein_coding	Top1
FBgn0004926	0.031458	0.752966	0.846408	protein_coding	eIF2beta
FBgn0004957	-0.0836314	0.675528	0.79067	protein_coding	por
FBgn0005198	0.0926423	0.361762	0.525918	protein_coding	gig
FBgn0005278	-0.62211	9.50879e-07	1.21982e-05	protein_coding	Sam-S
FBgn0005322	0.111227	0.428443	0.586605	protein_coding	nmd
FBgn0005355	-0.0865311	0.638145	0.763176	protein_coding	Su(fu)
FBgn0005386	-0.0664849	0.662442	0.781031	protein_coding	ash1
FBgn0005391	0.176954	0.605219	0.737826	protein_coding	Yp2
FBgn0005411	-0.189671	0.0438817	0.112864	protein_coding	U2af50
FBgn0005427	-0.21883	0.0977287	0.205237	protein_coding	ewg
FBgn0005533	-0.506647	2.83071e-06	3.23179e-05	protein_coding	RpS17
FBgn0005536	0.304683	0.00103406	0.00532909	protein_coding	Mbs
FBgn0005564	0.521067	0.0188598	0.0579191	protein_coding	Shal
FBgn0005585	0.00342504	0.975558	0.985763	protein_coding	Calr
FBgn0005586	0.163913	0.345053	0.509962	protein_coding	Rab3
FBgn0005593	-0.689876	1.67577e-06	2.02196e-05	protein_coding	RpL7
FBgn0005596	-0.0305366	0.871316	0.922901	protein_coding	yem
FBgn0005612	1.07804	1.66068e-13	1.05504e-11	protein_coding	Sox14
FBgn0005614	-0.0298061	0.929487	0.958039	protein_coding	trpl
FBgn0005616	-0.00924625	0.959637	0.97628	protein_coding	msl-2
FBgn0005617	-0.10606	0.484511	0.638116	protein_coding	msl-1
FBgn0005624	0.210916	0.210792	0.360107	protein_coding	Psc
FBgn0005626	-0.802185	0.00100112	0.00519704	protein_coding	ple
FBgn0005631	0.45866	0.00359099	0.0150657	protein_coding	robo1
FBgn0005632	-0.262583	0.00291965	0.0127176	protein_coding	faf
FBgn0005633	-1.71881	2.37393e-05	0.000209945	protein_coding	fln
FBgn0005636	0.24171	0.429966	0.587741	protein_coding	nvy
FBgn0005638	0.994923	0.00225752	0.0102344	protein_coding	slbo
FBgn0005640	0.345755	0.00526641	0.0205614	protein_coding	Eip63E
FBgn0005642	-0.137989	0.321525	0.48572	protein_coding	wdn
FBgn0005648	0.189395	0.183481	0.324908	protein_coding	Pabp2
FBgn0005649	0.239692	0.00284711	0.0124423	protein_coding	Rox8
FBgn0005654	0.278543	0.285191	0.446953	protein_coding	Orc3
FBgn0005655	1.54935	2.10163e-10	6.86264e-09	protein_coding	PCNA
FBgn0005659	-0.971801	0.00869563	0.0308937	protein_coding	Ets98B
FBgn0005660	1.18348	0.00011163	0.0008007	protein_coding	Ets21C
FBgn0005664	1.71349	1.99734e-07	3.0479e-06	protein_coding	Crys
FBgn0005666	0.720953	0.00380903	0.0158452	protein_coding	bt
FBgn0005670	-2.56087	6.5443e-46	8.73103e-43	protein_coding	Cyp4d1
FBgn0005671	-0.264816	0.000298805	0.00186409	protein_coding	Vha55
FBgn0005672	0.208861	0.18599	0.328473	protein_coding	spi
FBgn0005674	-0.231046	0.0485663	0.121729	protein_coding	GluProRS
FBgn0005677	0.0780115	0.790356	0.870568	protein_coding	dac
FBgn0005683	0.147401	0.672713	0.788858	protein_coding	pie
FBgn0005694	-0.350032	0.00484612	0.0192669	protein_coding	Aef1
FBgn0005695	0.131731	0.400718	0.561654	protein_coding	gcl
FBgn0005696	0.989609	6.11973e-05	0.000474292	protein_coding	DNApol-alpha73
FBgn0005771	-0.0794374	0.344809	0.509804	protein_coding	noc
FBgn0005777	0.233191	0.00642415	0.0241624	protein_coding	PpD3
FBgn0008635	0.0803074	0.314274	0.478379	protein_coding	betaCOP
FBgn0008646	0.0302658	0.929159	0.957983	protein_coding	E5
FBgn0010014	-0.264372	0.393711	0.555586	protein_coding	CanB
FBgn0010015	-0.59658	0.102455	0.21225	protein_coding	CanA1
FBgn0010019	-0.436633	0.210514	0.359808	protein_coding	Cyp4g1
FBgn0010038	2.23214	1.13058e-12	6.28483e-11	protein_coding	GstD2
FBgn0010039	0.702495	0.00872023	0.0309533	protein_coding	GstD3
FBgn0010040	1.68192	3.94706e-07	5.65362e-06	protein_coding	GstD4
FBgn0010041	1.95834	2.46602e-15	2.28021e-13	protein_coding	GstD5
FBgn0010043	0.746956	0.000634971	0.00356156	protein_coding	GstD7
FBgn0010044	2.2806	6.61965e-29	4.75545e-26	protein_coding	GstD8
FBgn0010051	-0.554617	2.32846e-05	0.000206706	protein_coding	Itpr
FBgn0010053	-0.827933	4.87069e-06	5.23445e-05	protein_coding	Jheh1
FBgn0010078	-0.477348	4.31936e-06	4.71244e-05	protein_coding	RpL23
FBgn0010100	-0.409633	0.00140419	0.00686943	protein_coding	mAcon1
FBgn0010105	-0.470073	0.129444	0.252314	protein_coding	comm
FBgn0010113	0.348915	0.00065367	0.00365109	protein_coding	hdc
FBgn0010173	0.746593	3.63567e-10	1.11131e-08	protein_coding	RpA-70
FBgn0010194	0.300136	0.335636	0.499921	protein_coding	Wnt5
FBgn0010198	-0.556058	8.5298e-07	1.11882e-05	protein_coding	RpS15Aa
FBgn0010213	-0.278393	0.0232712	0.0684288	protein_coding	Sod2
FBgn0010215	0.353552	0.00188956	0.00887144	protein_coding	alpha-Cat
FBgn0010217	-0.195852	0.0658116	0.153424	protein_coding	ATPsynbeta
FBgn0010220	-0.423513	0.00883202	0.0313026	protein_coding	Dbp45A
FBgn0010222	0.126899	0.620562	0.750606	protein_coding	Nmdmc
FBgn0010223	0.189141	0.228436	0.382128	protein_coding	Galphaf
FBgn0010225	-0.0877266	0.626811	0.75523	protein_coding	Gel
FBgn0010226	0.868581	8.23967e-05	0.000616095	protein_coding	GstS1
FBgn0010228	0.227768	0.0251661	0.0730268	protein_coding	HmgZ
FBgn0010235	0.264401	0.00218039	0.00995241	protein_coding	Klc
FBgn0010238	-0.926917	4.71474e-05	0.000380233	protein_coding	Lac
FBgn0010240	0.0320143	0.923951	0.955779	protein_coding	Lcch3
FBgn0010241	-1.65614	1.09487e-13	7.60409e-12	protein_coding	Mdr50
FBgn0010246	0.179161	0.0624775	0.147641	protein_coding	Myo61F
FBgn0010247	0.857543	1.37391e-10	4.68282e-09	protein_coding	Parp
FBgn0010263	0.357317	0.191288	0.335418	protein_coding	Rbp9
FBgn0010265	-0.458666	0.00129336	0.00642142	protein_coding	RpS13
FBgn0010269	0.0364451	0.71995	0.822648	protein_coding	Dsor1
FBgn0010278	0.483982	0.000279776	0.00176066	protein_coding	Ssrp
FBgn0010280	-0.178394	0.0695975	0.15958	protein_coding	Taf4
FBgn0010282	0.160163	0.0926388	0.197749	protein_coding	TfIIFalpha
FBgn0010287	-0.2427	0.357718	0.522233	protein_coding	Trf
FBgn0010288	0.83299	4.89875e-15	4.39898e-13	protein_coding	Uch
FBgn0010292	-0.282021	0.0498923	0.124285	protein_coding	bys
FBgn0010300	0.432308	0.000741396	0.00404669	protein_coding	brat
FBgn0010303	0.357356	1.05894e-05	0.000102801	protein_coding	hep
FBgn0010309	0.115893	0.555185	0.697548	protein_coding	pigeon
FBgn0010313	0.175839	0.246817	0.403329	protein_coding	corto
FBgn0010314	0.539301	0.119543	0.237737	protein_coding	Cks30A
FBgn0010315	-0.176809	0.292845	0.454979	protein_coding	CycD
FBgn0010316	0.0905606	0.591573	0.726361	protein_coding	dap
FBgn0010328	-0.0935395	0.397402	0.558264	protein_coding	woc
FBgn0010333	0.160682	0.0383227	0.101733	protein_coding	Rac1
FBgn0010339	-0.22526	0.0219661	0.0652693	protein_coding	128up
FBgn0010340	0.0563023	0.673129	0.789147	protein_coding	140up
FBgn0010341	0.419409	3.53799e-08	6.55242e-07	protein_coding	Cdc42
FBgn0010342	-0.099655	0.58518	0.721928	protein_coding	Map60
FBgn0010348	0.245484	0.00200628	0.00930782	protein_coding	Arf79F
FBgn0010350	-0.552422	3.71391e-08	6.78751e-07	protein_coding	Cds
FBgn0010352	-0.247515	0.0956337	0.202181	protein_coding	Nc73EF
FBgn0010355	-0.293108	0.00138594	0.00680869	protein_coding	Taf1
FBgn0010356	0.184837	0.219426	0.371101	protein_coding	Taf5
FBgn0010357	-0.0375724	0.904639	0.942379	protein_coding	betaTry
FBgn0010358	-1.09847	0.00441188	0.017883	protein_coding	deltaTry
FBgn0010359	-0.986607	0.00814453	0.029277	protein_coding	gammaTry
FBgn0010379	0.303037	0.000813607	0.00435931	protein_coding	Akt1
FBgn0010380	0.209868	0.0133189	0.0438286	protein_coding	AP-1-2beta
FBgn0010382	1.1477	3.90766e-05	0.000322097	protein_coding	CycE
FBgn0010383	-0.450955	0.21266	0.362353	protein_coding	Cyp18a1
FBgn0010385	-0.0144067	0.963038	0.97812	protein_coding	Def
FBgn0010387	0.712659	4.63556e-15	4.20306e-13	protein_coding	Acbp2
FBgn0010388	1.7152	1.92667e-07	2.97407e-06	protein_coding	Dro
FBgn0010389	0.380735	0.148605	0.279777	protein_coding	htl
FBgn0010391	-0.41594	0.000114479	0.000813639	protein_coding	SrpRalpha
FBgn0010395	0.504859	2.25003e-06	2.62335e-05	protein_coding	Itgbn
FBgn0010397	0.388251	0.0200099	0.0605943	protein_coding	LamC
FBgn0010398	0.144778	0.554439	0.696985	protein_coding	Lrr47
FBgn0010406	-0.384326	0.000319642	0.00196779	protein_coding	RNaseX25
FBgn0010408	-0.639385	6.45087e-08	1.11054e-06	protein_coding	RpS9
FBgn0010409	-0.744494	5.92397e-07	8.10014e-06	protein_coding	RpL18A
FBgn0010411	-0.263273	0.00645043	0.0242514	protein_coding	RpS18
FBgn0010412	-0.601226	4.59391e-06	4.97709e-05	protein_coding	RpS19a
FBgn0010415	0.399321	0.00111965	0.00566742	protein_coding	Sdc
FBgn0010416	-0.0465695	0.648472	0.771007	protein_coding	TH1
FBgn0010417	-0.017098	0.879863	0.928425	protein_coding	Taf6
FBgn0010421	-0.0327751	0.833603	0.897512	protein_coding	TfIIFbeta
FBgn0010422	-0.257111	0.0688683	0.158375	protein_coding	TfIIS
FBgn0010423	0.186235	0.481953	0.636286	protein_coding	TpnC47D
FBgn0010424	0.700151	0.00473745	0.0189073	protein_coding	TpnC73F
FBgn0010425	-0.245879	0.517361	0.664873	protein_coding	epsilonTry
FBgn0010434	0.685903	9.36807e-07	1.20674e-05	protein_coding	cora
FBgn0010435	-1.03001	2.03041e-12	1.0713e-10	protein_coding	emp
FBgn0010438	-0.0868531	0.608972	0.741098	protein_coding	mtSSB
FBgn0010441	0.292347	0.0584204	0.140646	protein_coding	pll
FBgn0010452	0.355598	0.174851	0.314207	protein_coding	trn
FBgn0010453	-0.282206	0.349371	0.514389	protein_coding	Wnt4
FBgn0010470	0.618551	5.09513e-13	3.01161e-11	protein_coding	Fkbp14
FBgn0010473	0.542503	0.0962039	0.202947	protein_coding	tutl
FBgn0010482	0.628334	0.000104585	0.00075832	protein_coding	l(2)01289
FBgn0010488	0.215805	0.0149988	0.0484013	protein_coding	NAT1
FBgn0010497	-0.770892	0.00555269	0.0215073	protein_coding	dmGlut
FBgn0010501	-0.380505	0.0040087	0.0165067	protein_coding	Dcp-1
FBgn0010504	0.191055	0.0109622	0.0371601	protein_coding	kermit
FBgn0010516	-0.20255	0.00585465	0.0224176	protein_coding	wal
FBgn0010520	-0.331419	0.0436862	0.11261	protein_coding	Bka
FBgn0010531	-0.473745	0.00459536	0.0184824	protein_coding	Ccs
FBgn0010548	-0.292703	0.0291318	0.082169	protein_coding	Aldh-III
FBgn0010549	0.815845	9.42676e-06	9.30619e-05	protein_coding	l(2)03659
FBgn0010551	0.145137	0.0754028	0.169279	protein_coding	Phb2
FBgn0010583	0.440727	0.0231858	0.0682207	protein_coding	dock
FBgn0010590	0.208968	0.0487769	0.122131	protein_coding	Prosbeta1
FBgn0010591	0.0500403	0.689706	0.800343	protein_coding	Sply
FBgn0010602	-0.261871	0.00989791	0.0342304	protein_coding	lwr
FBgn0010607	-0.44401	0.101764	0.211054	protein_coding	l(2)05714
FBgn0010611	-0.0960957	0.432547	0.589875	protein_coding	Hmgs
FBgn0010612	0.00114152	0.992635	0.995834	protein_coding	ATPsynG
FBgn0010620	-0.577805	0.000164036	0.0011109	protein_coding	CG10939
FBgn0010621	0.202417	0.00959137	0.0333569	protein_coding	CCT5
FBgn0010622	0.504242	0.000118423	0.000837842	protein_coding	DCTN3-p24
FBgn0010638	0.061791	0.552663	0.695783	protein_coding	Sec61beta
FBgn0010651	-0.361958	0.101484	0.210741	protein_coding	MFS14
FBgn0010660	-0.0415481	0.766705	0.855791	protein_coding	Nup214
FBgn0010741	0.143131	0.176038	0.315672	protein_coding	Pfdn2
FBgn0010747	-0.238712	0.0501236	0.124629	protein_coding	Srp54k
FBgn0010750	0.00332136	0.982145	0.990096	protein_coding	atms
FBgn0010762	0.256326	0.094746	0.201144	protein_coding	simj
FBgn0010768	-0.250906	0.345675	0.510713	protein_coding	sqz
FBgn0010770	-0.132485	0.381964	0.54419	protein_coding	ppan
FBgn0010772	-0.321651	0.0128643	0.0425726	protein_coding	Xe7
FBgn0010774	0.301689	0.000831621	0.00444562	protein_coding	Ref1
FBgn0010786	-0.150348	0.411262	0.571884	protein_coding	l(3)02640
FBgn0010803	0.231739	0.0245438	0.0715894	protein_coding	TrpRS
FBgn0010808	-0.144024	0.20611	0.354458	protein_coding	Chchd3
FBgn0010812	0.47805	3.17682e-11	1.27332e-09	protein_coding	unc-45
FBgn0010825	-0.226271	0.0103755	0.0354297	protein_coding	Gug
FBgn0010830	-0.464432	0.00122614	0.0061432	protein_coding	l(3)04053
FBgn0010877	0.206153	0.10947	0.222345	protein_coding	l(3)05822
FBgn0010894	-0.705244	0.00279525	0.0122558	protein_coding	sinu
FBgn0010905	-0.0852998	0.483264	0.637098	protein_coding	Spn
FBgn0010909	0.840228	7.66553e-08	1.30161e-06	protein_coding	msn
FBgn0010926	-0.00974974	0.907096	0.94378	protein_coding	l(3)07882
FBgn0011016	-0.130204	0.320066	0.48422	protein_coding	SsRbeta
FBgn0011020	-0.412711	0.148445	0.279619	protein_coding	Sas-4
FBgn0011202	0.182955	0.157504	0.29222	protein_coding	dia
FBgn0011204	-0.761982	1.28265e-09	3.35537e-08	protein_coding	cue
FBgn0011205	0.297356	0.00447658	0.0181217	protein_coding	fbl
FBgn0011206	-0.966273	2.29527e-07	3.4407e-06	protein_coding	bol
FBgn0011207	-0.141004	0.216594	0.367576	protein_coding	pelo
FBgn0011211	-0.225144	0.0683237	0.157472	protein_coding	blw
FBgn0011217	0.172751	0.0213669	0.063834	protein_coding	eff
FBgn0011224	0.0112363	0.952988	0.972461	protein_coding	heph
FBgn0011225	0.561208	1.16436e-09	3.11574e-08	protein_coding	jar
FBgn0011227	0.01262	0.91516	0.949826	protein_coding	ox
FBgn0011230	-0.207723	0.0445239	0.114014	protein_coding	poe
FBgn0011232	0.017782	0.90067	0.940283	protein_coding	scat
FBgn0011236	-0.216571	0.213748	0.36387	protein_coding	ken
FBgn0011259	0.249954	0.301159	0.464342	protein_coding	Sema1a
FBgn0011260	1.4231	1.7811e-20	4.15843e-18	protein_coding	Sema2a
FBgn0011272	-0.592404	1.77176e-05	0.000162954	protein_coding	RpL13
FBgn0011274	0.0567201	0.812756	0.883986	protein_coding	Dif
FBgn0011284	-0.831402	1.07023e-07	1.75657e-06	protein_coding	RpS4
FBgn0011286	0.361737	0.176938	0.316735	protein_coding	RyR
FBgn0011289	0.0986983	0.410383	0.570832	protein_coding	TfIIA-L
FBgn0011290	-0.150375	0.208215	0.356749	protein_coding	Taf12
FBgn0011291	0.0882575	0.606165	0.738453	protein_coding	Taf11
FBgn0011296	0.0218966	0.924495	0.956221	protein_coding	l(2)efl
FBgn0011297	0.189918	0.190609	0.334479	protein_coding	Alg3
FBgn0011300	0.0735706	0.313264	0.477333	protein_coding	babo
FBgn0011305	-0.276877	0.0155915	0.0500376	protein_coding	Rsf1
FBgn0011327	0.301845	0.0252175	0.0731385	protein_coding	Uch-L5
FBgn0011335	0.0806264	0.650692	0.772693	protein_coding	vers
FBgn0011336	-0.170722	0.175969	0.315609	protein_coding	Stt3B
FBgn0011361	0.250231	0.0152031	0.0490099	protein_coding	ND-ACP
FBgn0011455	-0.348559	0.00205479	0.00949046	protein_coding	ND-SGDH
FBgn0011474	-0.070398	0.65405	0.774253	protein_coding	PR-Set7
FBgn0011476	-0.15802	0.400553	0.561507	protein_coding	l(3)neo43
FBgn0011481	-0.13198	0.103022	0.212906	protein_coding	Ssdp
FBgn0011509	-0.241804	0.00505552	0.0199264	protein_coding	SrpRbeta
FBgn0011554	0.337774	0.00161997	0.00776238	protein_coding	etaTry
FBgn0011555	-1.4399	2.77334e-08	5.30741e-07	protein_coding	thetaTry
FBgn0011556	-1.46062	5.09713e-11	1.90408e-09	protein_coding	zetaTry
FBgn0011566	-0.230253	0.233055	0.387374	protein_coding	Smyd3
FBgn0011570	0.606975	8.1907e-10	2.29021e-08	protein_coding	cpb
FBgn0011573	-0.0244242	0.774909	0.861444	protein_coding	Cdc37
FBgn0011576	-0.361354	5.23842e-05	0.000415294	protein_coding	Cyp4d2
FBgn0011584	-0.50237	1.14713e-09	3.08734e-08	protein_coding	Trp1
FBgn0011586	0.274779	0.0103624	0.0354224	protein_coding	e(r)
FBgn0011589	0.0417356	0.890582	0.935247	protein_coding	Elk
FBgn0011591	0.810466	0.000104454	0.000757959	protein_coding	fng
FBgn0011592	0.450841	0.000764336	0.00413565	protein_coding	fra
FBgn0011603	-0.560476	0.0704167	0.160866	protein_coding	ine
FBgn0011604	0.0117604	0.911894	0.94719	protein_coding	Iswi
FBgn0011606	0.123907	0.609842	0.741868	protein_coding	Klp3A
FBgn0011638	0.387247	0.00217003	0.00991485	protein_coding	La
FBgn0011640	0.097417	0.297167	0.460011	protein_coding	lark
FBgn0011642	0.140155	0.205375	0.353743	protein_coding	Zyx
FBgn0011648	0.349182	1.29467e-05	0.000123	protein_coding	Mad
FBgn0011655	-0.0151301	0.866668	0.920177	protein_coding	Med
FBgn0011656	-0.1061	0.443295	0.601385	protein_coding	Mef2
FBgn0011659	0.449499	0.0534086	0.131224	protein_coding	Mlh1
FBgn0011660	0.315835	0.265689	0.424905	protein_coding	Pms2
FBgn0011661	0.24612	0.0690018	0.158526	protein_coding	Moe
FBgn0011666	-0.297103	0.243898	0.399958	protein_coding	msi
FBgn0011672	-0.42604	0.00316679	0.0136226	protein_coding	Mvl
FBgn0011674	1.03373	5.13964e-10	1.52863e-08	protein_coding	insc
FBgn0011692	0.691093	0.0444138	0.113888	protein_coding	pav
FBgn0011695	-1.74674	4.34141e-22	1.39808e-19	protein_coding	EbpIII
FBgn0011703	1.46914	2.09471e-11	8.73326e-10	protein_coding	RnrL
FBgn0011704	0.239307	0.141022	0.268392	protein_coding	RnrS
FBgn0011705	-0.408685	0.102479	0.212254	protein_coding	rost
FBgn0011708	0.135267	0.182863	0.324176	protein_coding	Syx5
FBgn0011710	0.557177	1.98505e-05	0.000180159	protein_coding	Sep1
FBgn0011715	0.0290442	0.814957	0.885398	protein_coding	Snr1
FBgn0011722	-0.266646	0.409922	0.570445	protein_coding	Tig
FBgn0011723	-0.347874	0.308298	0.472308	protein_coding	byn
FBgn0011725	-0.0959588	0.313225	0.477333	protein_coding	twin
FBgn0011726	0.773066	8.09686e-08	1.36739e-06	protein_coding	tsr
FBgn0011737	0.247916	0.112299	0.226661	protein_coding	Wee1
FBgn0011739	-0.211353	0.0524993	0.129379	protein_coding	wts
FBgn0011740	-0.0875185	0.732805	0.831551	protein_coding	alpha-Man-IIa
FBgn0011741	-0.0420694	0.755652	0.847692	protein_coding	Arp6
FBgn0011742	0.527075	2.32754e-06	2.70696e-05	protein_coding	Arp2
FBgn0011745	0.430856	0.00143286	0.00697974	protein_coding	Arp1
FBgn0011746	0.838406	0.00814976	0.0292824	protein_coding	ana
FBgn0011747	0.108794	0.118321	0.23601	protein_coding	Ank
FBgn0011754	0.592328	0.0452001	0.115271	protein_coding	PhKgamma
FBgn0011760	0.104458	0.174158	0.313625	protein_coding	ctp
FBgn0011761	-0.282069	0.371424	0.534226	protein_coding	dhd
FBgn0011762	0.775767	0.00719151	0.0265881	protein_coding	DNApol-alpha50
FBgn0011763	-0.0734621	0.457949	0.614303	protein_coding	Dp
FBgn0011766	-0.0964403	0.200079	0.347116	protein_coding	E2f1
FBgn0011768	-0.241956	0.0163615	0.0518668	protein_coding	Fdh
FBgn0011769	-0.125318	0.526524	0.673036	protein_coding	Fdx1
FBgn0011770	0.78864	0.000240155	0.0015457	protein_coding	Gip
FBgn0011771	0.312779	6.14691e-05	0.000475609	protein_coding	Hem
FBgn0011774	0.595876	0.00208324	0.00958505	protein_coding	Irbp
FBgn0011785	-0.186412	0.147656	0.278521	protein_coding	BRWD3
FBgn0011787	0.0810201	0.530875	0.676838	protein_coding	mRpL12
FBgn0011802	0.0997117	0.706995	0.813031	protein_coding	Gem3
FBgn0011817	0.177125	0.204269	0.352555	protein_coding	nmo
FBgn0011818	-0.0596959	0.667677	0.784825	protein_coding	oaf
FBgn0011822	0.385636	0.000985629	0.00513778	protein_coding	Pgcl
FBgn0011824	-0.50957	0.00064716	0.0036234	protein_coding	CG4038
FBgn0011826	-0.0813609	0.301101	0.46433	protein_coding	Pp2B-14D
FBgn0011828	-0.00468435	0.98456	0.991354	protein_coding	Pxn
FBgn0011829	-0.184872	0.560358	0.701876	protein_coding	Ret
FBgn0011834	0.24071	0.15056	0.282233	protein_coding	Ser6
FBgn0011836	-0.144649	0.272802	0.432892	protein_coding	Taf2
FBgn0011837	0.103381	0.428158	0.586391	protein_coding	Tis11
FBgn0012034	0.0982013	0.597175	0.730422	protein_coding	AcCoAS
FBgn0012036	-0.0753618	0.56228	0.703245	protein_coding	Aldh
FBgn0012037	-0.682079	6.34727e-16	6.62928e-14	protein_coding	Ance
FBgn0012051	-0.0623041	0.670209	0.786865	protein_coding	CalpA
FBgn0012058	-0.0453163	0.761205	0.851775	protein_coding	Cdc27
FBgn0012344	-1.13764	0.00262955	0.0116662	protein_coding	Dh44
FBgn0013263	-0.156311	0.110502	0.224003	protein_coding	Trl
FBgn0013269	-0.0575642	0.658192	0.777394	protein_coding	Fkbp39
FBgn0013272	-0.296115	0.00189909	0.00889894	protein_coding	Gp150
FBgn0013276	0.823524	0.0131599	0.0434406	protein_coding	Hsp70Ab
FBgn0013277	1.03287	0.00111083	0.00562891	protein_coding	Hsp70Ba
FBgn0013278	1.35221	4.96888e-07	6.93638e-06	protein_coding	Hsp70Bb
FBgn0013279	0.679137	0.0539157	0.132122	protein_coding	Hsp70Bc
FBgn0013303	0.0235366	0.854685	0.912043	protein_coding	Nca
FBgn0013305	0.640982	5.33169e-07	7.34405e-06	protein_coding	Nmda1
FBgn0013307	-0.60455	0.105923	0.21741	protein_coding	Odc1
FBgn0013323	-1.09462	0.00496735	0.0196319	protein_coding	Ptth
FBgn0013325	-0.461952	2.51542e-05	0.000221409	protein_coding	RpL11
FBgn0013334	-0.167737	0.060358	0.144238	protein_coding	Sap47
FBgn0013342	-0.103783	0.676382	0.791085	protein_coding	nSyb
FBgn0013343	0.584619	1.57281e-06	1.9251e-05	protein_coding	Syx1A
FBgn0013347	0.0145136	0.885665	0.932285	protein_coding	TfIIA-S
FBgn0013432	0.665584	1.00094e-05	9.78821e-05	protein_coding	bcn92
FBgn0013435	0.135423	0.546999	0.690982	protein_coding	Cdc2rk
FBgn0013467	-0.814055	0.0155377	0.0499334	protein_coding	igl
FBgn0013469	0.573141	0.00383527	0.0159189	protein_coding	klu
FBgn0013531	0.0512672	0.807146	0.881414	protein_coding	MED20
FBgn0013548	0.0463618	0.846877	0.906516	protein_coding	l(2)dtl
FBgn0013563	-0.068089	0.567634	0.707479	protein_coding	Pex1
FBgn0013576	0.0813768	0.349598	0.514559	protein_coding	mtd
FBgn0013672	-0.0237718	0.88437	0.931504	protein_coding	mt:ATPase6
FBgn0013674	0.481965	3.78311e-06	4.21604e-05	protein_coding	mt:CoI
FBgn0013675	0.363785	0.0286882	0.0811631	protein_coding	mt:CoII
FBgn0013678	0.2595	0.0444942	0.114	protein_coding	mt:Cyt-b
FBgn0013679	0.215847	0.225911	0.378844	protein_coding	mt:ND1
FBgn0013680	0.305445	0.229421	0.38308	protein_coding	mt:ND2
FBgn0013681	0.189475	0.471543	0.627582	protein_coding	mt:ND3
FBgn0013683	0.0161145	0.959562	0.97628	protein_coding	mt:ND4L
FBgn0013684	0.054677	0.662526	0.781032	protein_coding	mt:ND5
FBgn0013685	0.17429	0.632408	0.759524	protein_coding	mt:ND6
FBgn0013717	0.0479176	0.765734	0.855375	protein_coding	not
FBgn0013718	-0.677406	2.96349e-06	3.36691e-05	protein_coding	nuf
FBgn0013720	0.0122822	0.943812	0.966476	protein_coding	pck
FBgn0013726	0.577317	1.21901e-09	3.21591e-08	protein_coding	pnut
FBgn0013732	-0.859712	0.00824879	0.0296062	protein_coding	sced
FBgn0013733	-0.213672	0.0179729	0.0558379	protein_coding	shot
FBgn0013746	-0.0603342	0.574724	0.713363	protein_coding	alien
FBgn0013749	0.538988	1.53346e-05	0.000143209	protein_coding	Arf102F
FBgn0013750	0.168431	0.0565989	0.137115	protein_coding	Arf51F
FBgn0013753	-0.019729	0.951205	0.971277	protein_coding	Bgb
FBgn0013756	-0.140738	0.152009	0.284207	protein_coding	Mtor
FBgn0013759	-0.265981	0.000413134	0.00243423	protein_coding	CASK
FBgn0013762	0.142073	0.301865	0.464665	protein_coding	Cdk5
FBgn0013763	-0.634273	0.0684771	0.157747	protein_coding	Idgf6
FBgn0013764	-0.00640921	0.944798	0.966849	protein_coding	Chi
FBgn0013765	1.43611	6.71282e-22	2.02229e-19	protein_coding	cnn
FBgn0013770	0.384602	5.38466e-05	0.000425335	protein_coding	Cp1
FBgn0013771	-0.94765	1.9334e-06	2.29428e-05	protein_coding	Cyp6a9
FBgn0013772	0.235664	0.485435	0.638968	protein_coding	Cyp6a8
FBgn0013773	0.568019	0.10618	0.217668	protein_coding	Cyp6a22
FBgn0013799	0.136502	0.175538	0.315107	protein_coding	Deaf1
FBgn0013811	-0.612714	0.00329945	0.0140901	protein_coding	Dhc62B
FBgn0013949	-0.0773237	0.832531	0.896771	protein_coding	Elal
FBgn0013953	-0.449133	0.213226	0.363114	protein_coding	Esp
FBgn0013954	0.154821	0.0214695	0.0640983	protein_coding	Fkbp12
FBgn0013972	-0.396242	0.237288	0.392533	protein_coding	Gycalpha99B
FBgn0013973	-0.540967	0.117117	0.23436	protein_coding	Gycbeta100B
FBgn0013981	-0.448899	9.34713e-07	1.20674e-05	protein_coding	His4r
FBgn0013983	0.150557	0.198269	0.344972	protein_coding	imd
FBgn0013987	0.483935	1.55806e-06	1.91205e-05	protein_coding	MAPk-Ak2
FBgn0013995	-0.176087	0.176513	0.316341	protein_coding	Calx
FBgn0013997	0.202252	0.0610434	0.145582	protein_coding	Nrx-IV
FBgn0014000	-0.57852	0.105593	0.216924	protein_coding	Hf
FBgn0014002	-0.180051	0.0688455	0.158367	NA	NA
FBgn0014006	-0.394092	0.000401231	0.00237308	protein_coding	Ask1
FBgn0014007	0.233344	0.121108	0.23993	protein_coding	Ptp69D
FBgn0014009	0.242828	0.000118671	0.000838962	protein_coding	Rab2
FBgn0014010	0.43073	1.54048e-06	1.89546e-05	protein_coding	Rab5
FBgn0014011	0.181764	0.0889655	0.191572	protein_coding	Rac2
FBgn0014018	-0.265205	0.255403	0.413377	protein_coding	Rel
FBgn0014020	0.883518	2.42807e-14	1.9548e-12	protein_coding	Rho1
FBgn0014022	-0.284023	0.200703	0.347813	protein_coding	Rlb1
FBgn0014023	0.0989091	0.488967	0.642078	protein_coding	mRpL47
FBgn0014024	-0.170887	0.0473276	0.119361	protein_coding	Rnp4F
FBgn0014026	-0.647339	4.92021e-07	6.88903e-06	protein_coding	RpL7A
FBgn0014028	-0.172956	0.0715609	0.162859	protein_coding	SdhB
FBgn0014029	0.500409	8.55427e-07	1.12045e-05	protein_coding	Sep2
FBgn0014031	0.674775	0.0557217	0.135411	protein_coding	Spat
FBgn0014032	-0.189776	0.082421	0.180858	protein_coding	Sptr
FBgn0014033	-1.21834	0.000103764	0.000754129	protein_coding	Sr-CI
FBgn0014037	0.0603753	0.472333	0.628185	protein_coding	Su(Tpl)
FBgn0014073	-1.23906	4.62241e-05	0.000374079	protein_coding	Tie
FBgn0014075	0.0567156	0.44738	0.604643	protein_coding	Uggt
FBgn0014092	-0.0405509	0.765798	0.855375	protein_coding	CG4278
FBgn0014127	0.35132	0.0843405	0.183989	protein_coding	barr
FBgn0014133	0.458999	6.2221e-07	8.45826e-06	protein_coding	bif
FBgn0014135	-0.30826	0.155443	0.289527	protein_coding	bnl
FBgn0014141	-0.345276	0.117182	0.23439	protein_coding	cher
FBgn0014143	-0.0426349	0.904786	0.942426	protein_coding	croc
FBgn0014163	-0.301632	0.101703	0.210997	protein_coding	fax
FBgn0014184	-0.00386856	0.974213	0.985529	protein_coding	Oda
FBgn0014189	0.0410155	0.700943	0.808439	protein_coding	Hel25E
FBgn0014269	-0.114409	0.288394	0.450387	protein_coding	prod
FBgn0014340	-0.169356	0.538294	0.684428	protein_coding	mof
FBgn0014342	-1.29709	5.96933e-10	1.73791e-08	protein_coding	mia
FBgn0014343	-0.848551	0.000965943	0.00504245	protein_coding	mirr
FBgn0014366	-0.131947	0.360247	0.524858	protein_coding	noi
FBgn0014380	0.230558	0.0488754	0.122306	protein_coding	RhoL
FBgn0014388	0.233707	0.290326	0.452647	protein_coding	sty
FBgn0014391	-0.132712	0.314309	0.478379	protein_coding	sun
FBgn0014395	-0.646322	0.00450086	0.0182042	protein_coding	tilB
FBgn0014396	-0.462718	0.00142023	0.006937	protein_coding	tim
FBgn0014411	-0.0144444	0.877498	0.926821	protein_coding	Vps26
FBgn0014417	-0.02417	0.934659	0.961108	protein_coding	CG13397
FBgn0014427	-0.230409	0.130387	0.253897	protein_coding	CG11899
FBgn0014455	-0.349952	0.020987	0.06284	protein_coding	Ahcy
FBgn0014469	-0.153761	0.548406	0.692291	protein_coding	Cyp4e2
FBgn0014857	0.246444	0.00223346	0.01015	protein_coding	His3.3A
FBgn0014859	-0.0893664	0.813558	0.884084	protein_coding	Hr38
FBgn0014861	0.723446	0.000110672	0.000795666	protein_coding	Mcm2
FBgn0014863	0.641726	0.00493675	0.0195523	protein_coding	Mlp84B
FBgn0014865	0.938517	0.00445248	0.018032	protein_coding	Mtk
FBgn0014868	0.160504	0.0975501	0.205	protein_coding	Ost48
FBgn0014869	-0.331116	0.00367672	0.0153643	protein_coding	Pglym78
FBgn0014870	0.0373492	0.666812	0.784151	protein_coding	Psi
FBgn0014877	0.27858	0.0184366	0.0570284	protein_coding	Roe1
FBgn0014879	0.0151667	0.890756	0.935324	protein_coding	Set
FBgn0014903	0.888943	1.78024e-15	1.71398e-13	protein_coding	CG14630
FBgn0014906	0.143473	0.209333	0.358198	protein_coding	Hydr2
FBgn0014930	0.118432	0.338574	0.502802	protein_coding	CG2846
FBgn0014931	-0.295873	0.180289	0.320814	protein_coding	CG2678
FBgn0015000	0.0465954	0.616297	0.747057	protein_coding	betaggt-I
FBgn0015001	-1.36189	7.54518e-35	7.102e-32	protein_coding	iotaTry
FBgn0015010	0.0474194	0.862482	0.917394	protein_coding	Ag5r
FBgn0015011	-0.382357	0.151402	0.283548	protein_coding	AhcyL2
FBgn0015019	0.323905	9.4744e-05	0.000696156	protein_coding	CCT3
FBgn0015024	0.249028	0.000482279	0.00280274	protein_coding	CkIalpha
FBgn0015025	-0.531734	0.0870078	0.188225	protein_coding	CkIIalpha-i1
FBgn0015031	-0.110139	0.489852	0.642788	protein_coding	cype
FBgn0015033	-0.829594	6.32525e-05	0.000486586	protein_coding	Cyp4d8
FBgn0015034	-0.481506	0.0977967	0.20528	protein_coding	Cyp4e1
FBgn0015035	-0.313039	0.397988	0.558582	protein_coding	Cyp4e3
FBgn0015036	-0.139416	0.164862	0.302603	protein_coding	Cyp4ae1
FBgn0015037	-1.51365	1.3505e-12	7.46293e-11	protein_coding	Cyp4p1
FBgn0015038	-0.57028	0.00309431	0.0133287	protein_coding	Cyp9b1
FBgn0015039	1.35033	6.82003e-17	9.09889e-15	protein_coding	Cyp9b2
FBgn0015040	-0.616297	0.000256037	0.00162937	protein_coding	Cyp9c1
FBgn0015075	-0.0423252	0.735771	0.833904	protein_coding	Ddx1
FBgn0015218	0.091413	0.125207	0.246067	protein_coding	eIF4E1
FBgn0015221	0.417021	0.0016003	0.00768784	protein_coding	Fer2LCH
FBgn0015222	0.435929	0.000306949	0.00190598	protein_coding	Fer1HCH
FBgn0015229	0.142609	0.344181	0.509399	protein_coding	glec
FBgn0015239	-0.0947902	0.381003	0.543151	protein_coding	Hr78
FBgn0015240	0.743962	7.39835e-07	9.80045e-06	protein_coding	Hr96
FBgn0015245	0.115967	0.259495	0.418173	protein_coding	Hsp60A
FBgn0015247	-0.242833	0.0024188	0.010855	protein_coding	Diap2
FBgn0015268	-0.783256	2.99665e-12	1.52096e-10	protein_coding	Nap1
FBgn0015269	-0.308277	0.00570552	0.0219185	protein_coding	Nf1
FBgn0015270	1.0859	0.000386465	0.00229701	protein_coding	Orc2
FBgn0015271	0.486635	0.119436	0.237575	protein_coding	Orc5
FBgn0015277	-0.137754	0.130693	0.254386	protein_coding	Pi3K59F
FBgn0015278	0.0344159	0.641936	0.765743	protein_coding	Pi3K68D
FBgn0015279	0.360648	0.00034872	0.00211749	protein_coding	Pi3K92E
FBgn0015282	0.246775	0.00452365	0.0182727	protein_coding	Rpt2
FBgn0015283	0.158618	0.0869128	0.188063	protein_coding	Rpn10
FBgn0015286	0.882592	7.17893e-14	5.15723e-12	protein_coding	Rala
FBgn0015288	-0.872373	2.01031e-08	4.01159e-07	protein_coding	RpL22
FBgn0015295	-0.0273806	0.78183	0.866067	protein_coding	Shark
FBgn0015296	0.738864	1.30789e-11	5.68111e-10	protein_coding	Shc
FBgn0015298	-0.138909	0.305889	0.469482	protein_coding	Srp19
FBgn0015299	0.0868951	0.54215	0.687566	protein_coding	Ssb-c31a
FBgn0015316	-1.74418	5.78888e-06	6.0608e-05	protein_coding	Try29F
FBgn0015320	0.603142	2.19871e-07	3.30657e-06	protein_coding	Ubc2
FBgn0015321	0.0225272	0.78469	0.86745	protein_coding	Ubc4
FBgn0015331	-0.0252622	0.874571	0.924968	protein_coding	abs
FBgn0015336	0.598298	8.0578e-05	0.000604432	protein_coding	CG15865
FBgn0015338	0.0487542	0.693268	0.802699	protein_coding	CG5861
FBgn0015351	1.89641	7.04287e-19	1.24101e-16	protein_coding	CG14906
FBgn0015359	0.0198338	0.894105	0.936734	protein_coding	CG2034
FBgn0015360	0.0645521	0.568272	0.70791	protein_coding	oxt
FBgn0015371	0.254305	0.19901	0.345777	protein_coding	chn
FBgn0015372	0.821063	1.80683e-10	5.96255e-09	protein_coding	RabX1
FBgn0015376	0.464806	0.0331546	0.0910216	protein_coding	cutlet
FBgn0015379	-0.0406631	0.727592	0.827748	protein_coding	dod
FBgn0015380	-1.93639	3.4913e-14	2.73994e-12	protein_coding	drl
FBgn0015391	-0.0787148	0.671178	0.787552	protein_coding	glu
FBgn0015393	-0.018619	0.872774	0.923817	NA	NA
FBgn0015396	0.788682	0.00509738	0.0200609	protein_coding	jumu
FBgn0015399	0.421195	0.158809	0.294153	protein_coding	kek1
FBgn0015400	0.0468115	0.892643	0.935892	protein_coding	kek2
FBgn0015402	-0.0820675	0.581467	0.718893	protein_coding	ksr
FBgn0015477	0.456809	1.88351e-07	2.92195e-06	protein_coding	Rme-8
FBgn0015509	0.420938	8.19375e-06	8.21928e-05	protein_coding	Cul1
FBgn0015513	-0.396118	7.43158e-05	0.000562427	protein_coding	mbc
FBgn0015519	-0.740155	0.0555484	0.135201	protein_coding	nAChRalpha3
FBgn0015520	0.0195603	0.937692	0.963166	protein_coding	nonA-l
FBgn0015521	-0.269341	0.0374837	0.100074	protein_coding	RpS21
FBgn0015522	-0.678137	0.0118144	0.0396317	protein_coding	olf186-M
FBgn0015524	-0.401196	0.215446	0.366214	protein_coding	otp
FBgn0015527	-0.425515	0.00377406	0.0157278	protein_coding	peng
FBgn0015544	-1.10957	1.19717e-07	1.94441e-06	protein_coding	spag
FBgn0015546	0.342989	0.106162	0.217668	protein_coding	spel1
FBgn0015550	-0.251297	0.319957	0.484211	protein_coding	tap
FBgn0015553	-0.182814	0.524451	0.671551	protein_coding	tos
FBgn0015568	-0.742511	2.06386e-05	0.000185688	protein_coding	alpha-Est1
FBgn0015569	-0.728821	0.00203624	0.0094234	protein_coding	alpha-Est10
FBgn0015570	-0.497046	0.122034	0.241508	protein_coding	alpha-Est2
FBgn0015571	0.247934	0.0745638	0.167815	protein_coding	alpha-Est3
FBgn0015572	-0.0356436	0.868344	0.921462	protein_coding	alpha-Est4
FBgn0015574	0.512362	0.0915235	0.195996	protein_coding	alpha-Est6
FBgn0015575	-1.9279	2.65575e-11	1.07835e-09	protein_coding	alpha-Est7
FBgn0015576	0.368518	0.0352403	0.0953662	protein_coding	alpha-Est8
FBgn0015577	0.530951	0.00116928	0.00588672	protein_coding	alpha-Est9
FBgn0015582	-0.0160751	0.899533	0.93968	protein_coding	dare
FBgn0015589	0.638784	6.77226e-06	6.97311e-05	protein_coding	Apc
FBgn0015591	0.265979	0.0856963	0.186294	protein_coding	AstA
FBgn0015600	-0.403325	0.00123791	0.00618887	protein_coding	toc
FBgn0015602	0.0581944	0.621295	0.751297	protein_coding	BEAF-32
FBgn0015609	-0.0563627	0.871919	0.923226	protein_coding	CadN
FBgn0015614	0.290365	0.00538022	0.020927	protein_coding	CanB2
FBgn0015615	-0.10237	0.439168	0.597087	protein_coding	SMC3
FBgn0015618	0.358507	0.04511	0.115104	protein_coding	Cdk8
FBgn0015621	0.0283518	0.861465	0.916636	protein_coding	Clp
FBgn0015622	0.28004	0.0101386	0.0348646	protein_coding	Cnx99A
FBgn0015623	0.0575847	0.702211	0.809124	protein_coding	Cpr
FBgn0015625	-0.148372	0.653273	0.773836	protein_coding	CycB3
FBgn0015663	0.0419296	0.801397	0.878226	protein_coding	Ugt36A1
FBgn0015664	0.00959433	0.925845	0.95668	protein_coding	Dref
FBgn0015714	-0.564265	0.0230573	0.0678852	protein_coding	Cyp6a17
FBgn0015721	0.490444	0.0867	0.187808	protein_coding	ktub
FBgn0015737	0.0948476	0.151631	0.283784	protein_coding	Hmu
FBgn0015754	0.352795	0.000271463	0.00171645	protein_coding	Lis-1
FBgn0015756	-0.71215	2.06881e-08	4.10934e-07	protein_coding	RpL9
FBgn0015765	0.491795	9.20312e-05	0.000679634	protein_coding	p38a
FBgn0015766	-0.97062	0.0063826	0.0240739	protein_coding	Msr-110
FBgn0015772	0.269796	0.00140384	0.00686943	protein_coding	Nak
FBgn0015773	0.745506	0.00204244	0.0094474	protein_coding	NetA
FBgn0015774	0.0167585	0.949169	0.969947	protein_coding	NetB
FBgn0015776	0.103095	0.559664	0.701289	protein_coding	nrv1
FBgn0015777	-0.113002	0.677166	0.791496	protein_coding	nrv2
FBgn0015778	0.164484	0.053716	0.131806	protein_coding	rin
FBgn0015781	-0.218505	0.0893426	0.19203	protein_coding	P5cr
FBgn0015789	0.324962	0.0017178	0.00818077	protein_coding	Rab10
FBgn0015790	0.309508	0.00222065	0.0101016	protein_coding	Rab11
FBgn0015791	0.681696	0.000218957	0.001422	protein_coding	Rab14
FBgn0015793	0.271175	0.0315908	0.087519	protein_coding	Rab19
FBgn0015794	0.404159	0.000714695	0.00393082	protein_coding	Rab18
FBgn0015795	0.257691	0.00765738	0.0279345	protein_coding	Rab7
FBgn0015797	0.39548	1.08597e-07	1.77928e-06	protein_coding	Rab6
FBgn0015799	0.208964	0.149361	0.280716	protein_coding	Rbf
FBgn0015801	-1.68862	3.03446e-09	7.28504e-08	protein_coding	Reg-5
FBgn0015803	0.534032	1.5727e-08	3.27114e-07	protein_coding	RtGEF
FBgn0015805	0.289552	0.00153487	0.00741934	protein_coding	HDAC1
FBgn0015808	0.44993	0.0137919	0.0451464	protein_coding	ScpX
FBgn0015818	-0.0407182	0.788411	0.86971	protein_coding	Spx
FBgn0015828	0.0891525	0.478759	0.633452	protein_coding	TfIIEalpha
FBgn0015829	0.255693	0.110701	0.22426	protein_coding	TfIIEbeta
FBgn0015834	-0.446671	3.86936e-05	0.000319633	protein_coding	eIF3i
FBgn0015838	0.283616	0.122787	0.242568	protein_coding	Vang
FBgn0015872	-0.488708	0.00721779	0.0266431	protein_coding	Drip
FBgn0015903	0.27335	0.0101967	0.0350356	protein_coding	apt
FBgn0015904	-0.906784	0.0105798	0.0360077	protein_coding	ara
FBgn0015905	-0.386513	0.00309345	0.0133287	protein_coding	ast
FBgn0015919	-1.24045	0.00015201	0.00104132	protein_coding	caup
FBgn0015924	0.105431	0.302424	0.465295	protein_coding	crq
FBgn0015925	0.260012	0.177355	0.317242	protein_coding	csul
FBgn0015929	1.11037	1.21434e-08	2.62517e-07	protein_coding	dpa
FBgn0015949	-0.147022	0.061302	0.145971	protein_coding	hrg
FBgn0016013	0.285505	0.398049	0.558584	protein_coding	Faa
FBgn0016031	0.91484	4.185e-06	4.59108e-05	protein_coding	lama
FBgn0016032	0.386268	0.0914557	0.195896	protein_coding	lbm
FBgn0016034	1.13862	0.000582644	0.00329776	protein_coding	mael
FBgn0016038	0.119469	0.315744	0.480014	protein_coding	Vsp37A
FBgn0016041	-0.216487	0.0390752	0.103173	protein_coding	Tom40
FBgn0016053	-0.248631	0.106434	0.217916	protein_coding	pgc
FBgn0016054	-0.314368	0.26766	0.427259	protein_coding	phr6-4
FBgn0016059	0.451764	0.00822428	0.0295296	protein_coding	Sema1b
FBgn0016061	1.06708	0.000924881	0.00487167	protein_coding	side
FBgn0016070	-0.0675182	0.553094	0.696045	protein_coding	smg
FBgn0016075	-0.621964	0.0189409	0.0581108	protein_coding	vkg
FBgn0016076	-0.415667	0.00330113	0.0140901	protein_coding	vri
FBgn0016078	-0.163252	0.0866226	0.187696	protein_coding	wun
FBgn0016080	-0.411801	0.242463	0.398374	NA	NA
FBgn0016081	0.538653	9.36372e-07	1.20674e-05	protein_coding	fry
FBgn0016119	-0.0700744	0.479775	0.634288	protein_coding	ATPsynCF6
FBgn0016120	-0.282774	0.0181887	0.056396	protein_coding	ATPsynD
FBgn0016122	-0.226585	0.370105	0.533124	protein_coding	Acer
FBgn0016123	0.544956	0.144341	0.27354	protein_coding	Alp4
FBgn0016126	0.468025	0.0001435	0.000991229	protein_coding	CaMKI
FBgn0016131	-0.55096	0.00808501	0.0291304	protein_coding	Cdk4
FBgn0016641	-0.210473	0.217462	0.368661	protein_coding	PTP-ER
FBgn0016650	-0.215842	0.548943	0.6925	protein_coding	Lgr1
FBgn0016672	-0.550393	1.25137e-06	1.56238e-05	protein_coding	Ipp
FBgn0016684	0.583571	0.0600516	0.143657	protein_coding	NaPi-T
FBgn0016685	-0.0712201	0.590799	0.725854	protein_coding	Nlp
FBgn0016687	-0.3355	0.00238751	0.0107559	protein_coding	Nurf-38
FBgn0016691	-0.0280389	0.775379	0.861691	protein_coding	ATPsynO
FBgn0016693	0.629107	5.01636e-14	3.71808e-12	protein_coding	Past1
FBgn0016694	-0.239336	0.0689127	0.158407	protein_coding	Pdp1
FBgn0016696	-0.287114	0.00999418	0.0344921	protein_coding	Pitslre
FBgn0016697	0.448947	0.00120492	0.00605264	protein_coding	Prosalpha5
FBgn0016698	0.0663845	0.682848	0.795945	protein_coding	Ptpa
FBgn0016701	0.0290679	0.809008	0.882219	protein_coding	Rab4
FBgn0016715	-1.07333	4.84513e-11	1.83193e-09	protein_coding	Reg-2
FBgn0016726	-0.339067	0.0125087	0.0415724	protein_coding	RpL29
FBgn0016754	0.379244	0.00225341	0.0102307	protein_coding	sba
FBgn0016756	-0.397567	0.00157471	0.0075766	protein_coding	Usp47
FBgn0016762	0.342231	0.0596943	0.143111	protein_coding	angel
FBgn0016794	0.280473	0.0573478	0.138566	protein_coding	dos
FBgn0016797	0.145317	0.259092	0.417686	protein_coding	fz2
FBgn0016917	0.126584	0.0871627	0.188472	protein_coding	Stat92E
FBgn0016920	-1.15038	0.00124231	0.00620424	protein_coding	nompC
FBgn0016926	-0.407009	0.00465615	0.0186706	protein_coding	Pino
FBgn0016930	0.0560892	0.745021	0.840067	protein_coding	Dyrk2
FBgn0016970	-0.475277	0.0740482	0.166944	protein_coding	l(2)k10201
FBgn0016975	-0.0703956	0.766263	0.855587	protein_coding	stnB
FBgn0016976	-0.0703956	0.766263	0.855587	protein_coding	stnA
FBgn0016977	-0.263262	0.0235871	0.0692232	protein_coding	spen
FBgn0016978	-0.0601323	0.719319	0.822042	protein_coding	snRNP-U1-70K
FBgn0016983	0.0280147	0.76671	0.855791	protein_coding	smid
FBgn0016984	0.422776	0.000139439	0.000967474	protein_coding	sktl
FBgn0017414	-0.194582	0.465708	0.622206	protein_coding	cag
FBgn0017418	0.0611568	0.534389	0.68039	protein_coding	ari-1
FBgn0017424	-0.189734	0.5235	0.670602	ncRNA	asRNA:CR11538
FBgn0017429	0.0854239	0.535142	0.681256	protein_coding	CG5989
FBgn0017430	0.304909	0.178243	0.318564	protein_coding	Nelf-E
FBgn0017448	0.484118	0.0921708	0.196976	protein_coding	CG2187
FBgn0017457	-0.210062	0.07896	0.175198	protein_coding	U2af38
FBgn0017482	-0.394123	0.000685658	0.00380021	protein_coding	T3dh
FBgn0017545	-0.66033	4.00557e-07	5.72864e-06	protein_coding	RpS3A
FBgn0017550	0.153902	0.170612	0.30993	protein_coding	Rga
FBgn0017551	0.115867	0.669434	0.786297	protein_coding	Rca1
FBgn0017558	-0.763426	0.00267298	0.0118084	protein_coding	Pdk
FBgn0017561	-0.969296	4.05592e-09	9.35266e-08	protein_coding	Ork1
FBgn0017566	-0.250201	0.0155854	0.050035	protein_coding	ND-75
FBgn0017567	-0.156321	0.136372	0.262107	protein_coding	ND-23
FBgn0017572	0.121029	0.0492028	0.122994	protein_coding	Mo25
FBgn0017577	1.35107	1.80234e-07	2.81002e-06	protein_coding	Mcm5
FBgn0017578	-0.399274	0.000368292	0.00220904	protein_coding	Max
FBgn0017579	-0.498124	2.34801e-05	0.000208244	protein_coding	RpL14
FBgn0017581	-0.452638	0.00103455	0.00532909	protein_coding	Lk6
FBgn0017590	0.917257	0.00662837	0.0248006	protein_coding	klg
FBgn0019624	-0.0672355	0.455585	0.612365	protein_coding	COX5A
FBgn0019637	-0.174861	0.137944	0.26415	protein_coding	Atu
FBgn0019643	-0.164701	0.239793	0.395659	protein_coding	AANAT1
FBgn0019644	-0.206781	0.0667947	0.15509	protein_coding	ATPsynB
FBgn0019662	0.885806	1.72636e-13	1.08936e-11	protein_coding	qm
FBgn0019686	-0.290055	0.113012	0.227854	protein_coding	lok
FBgn0019830	-0.759472	1.54836e-06	1.90265e-05	protein_coding	colt
FBgn0019890	0.291534	0.0189486	0.0581152	protein_coding	Smg5
FBgn0019925	-0.237926	0.0842732	0.183928	protein_coding	Surf4
FBgn0019928	1.54995	1.11824e-07	1.82574e-06	protein_coding	Ser8
FBgn0019929	-0.693787	0.0514607	0.127525	protein_coding	Ser7
FBgn0019932	0.0601321	0.642137	0.765757	protein_coding	SamDC
FBgn0019936	-0.413458	0.000235456	0.0015228	protein_coding	RpS20
FBgn0019938	-0.501087	0.000617179	0.00347638	protein_coding	RpI1
FBgn0019949	0.364923	0.0185152	0.0571803	protein_coding	Cdk9
FBgn0019952	0.485438	0.0366177	0.0982266	protein_coding	Orct
FBgn0019957	-0.134446	0.274284	0.434453	protein_coding	ND-42
FBgn0019960	-0.015742	0.87062	0.922765	protein_coding	Mitofilin
FBgn0019968	0.184367	0.100566	0.2095	protein_coding	Khc-73
FBgn0019972	0.66905	8.69699e-05	0.000646666	protein_coding	Drice
FBgn0019982	0.159607	0.154874	0.288696	protein_coding	Gs1l
FBgn0019990	-0.14368	0.418872	0.577736	protein_coding	Gcn2
FBgn0020018	-0.105589	0.406338	0.567061	protein_coding	Ppox
FBgn0020224	0.192573	0.0839773	0.183444	protein_coding	Cbl
FBgn0020235	-0.0227406	0.829117	0.894435	protein_coding	ATPsyngamma
FBgn0020236	-0.0207021	0.90691	0.94378	protein_coding	ATPCL
FBgn0020238	0.331225	0.000472449	0.00275075	protein_coding	14-3-3epsilon
FBgn0020249	-0.00502529	0.954341	0.973255	protein_coding	stck
FBgn0020251	0.325062	0.0141332	0.0460476	protein_coding	sfl
FBgn0020255	0.038191	0.572059	0.711284	protein_coding	Ran
FBgn0020257	0.394699	0.00015693	0.00106898	protein_coding	Ppa
FBgn0020258	-0.0601968	0.866581	0.920177	protein_coding	ppk
FBgn0020261	-0.2059	0.0282435	0.0801234	protein_coding	pcm
FBgn0020270	-0.308175	0.0213491	0.0638012	protein_coding	mre11
FBgn0020272	0.681652	0.00112239	0.00567823	protein_coding	mst
FBgn0020278	0.804204	2.47118e-08	4.77812e-07	protein_coding	loco
FBgn0020279	0.153948	0.00896786	0.0316638	protein_coding	lig
FBgn0020294	-0.686106	0.00978696	0.0339148	protein_coding	ko
FBgn0020299	0.0622908	0.809125	0.882244	protein_coding	stumps
FBgn0020300	-0.755822	0.013874	0.0453675	protein_coding	geko
FBgn0020304	-0.154491	0.246417	0.402817	protein_coding	drongo
FBgn0020305	-0.158631	0.337759	0.50227	protein_coding	dbe
FBgn0020306	-0.618726	8.32473e-09	1.8336e-07	protein_coding	dom
FBgn0020307	-0.68534	0.000111786	0.000801202	protein_coding	dve
FBgn0020309	0.131089	0.0705387	0.161	protein_coding	crol
FBgn0020312	-0.0311479	0.884325	0.931504	protein_coding	Tmtc3
FBgn0020369	0.451008	4.99539e-06	5.35e-05	protein_coding	Rpt6
FBgn0020370	-0.00119972	0.986963	0.992452	protein_coding	TppII
FBgn0020379	-0.37428	0.0344532	0.0937251	protein_coding	Rfx
FBgn0020381	-0.167427	0.1071	0.218863	protein_coding	Dredd
FBgn0020385	-0.440981	0.000330636	0.00202347	protein_coding	pug
FBgn0020386	-0.0327939	0.838279	0.90016	protein_coding	Pdk1
FBgn0020388	0.853633	6.24493e-07	8.47695e-06	protein_coding	Gcn5
FBgn0020389	0.230157	0.0289206	0.0816849	protein_coding	Papss
FBgn0020391	-0.0507966	0.867746	0.921105	protein_coding	Nrk
FBgn0020392	0.136459	0.131617	0.255652	protein_coding	Nmt
FBgn0020407	0.340648	0.0263125	0.0757264	protein_coding	asun
FBgn0020412	-0.252172	0.0041671	0.0170462	protein_coding	JIL-1
FBgn0020414	-0.0170171	0.958216	0.975876	protein_coding	Idgf3
FBgn0020415	-0.850982	0.00924508	0.0323958	protein_coding	Idgf2
FBgn0020416	-0.574283	0.130554	0.254168	protein_coding	Idgf1
FBgn0020440	-0.233105	0.0198641	0.060309	protein_coding	Fak
FBgn0020443	-0.0587535	0.36988	0.533073	protein_coding	eRF3
FBgn0020445	0.0588009	0.774078	0.861122	protein_coding	E23
FBgn0020493	-0.165775	0.124612	0.245362	protein_coding	Dad
FBgn0020496	0.319227	0.00010342	0.000752214	protein_coding	CtBP
FBgn0020497	-0.0153206	0.821839	0.889666	protein_coding	emb
FBgn0020503	-0.151625	0.128753	0.251237	protein_coding	CLIP-190
FBgn0020506	1.02115	6.45704e-08	1.11054e-06	protein_coding	Amyrel
FBgn0020508	0.640578	0.00205626	0.00949255	protein_coding	Ag5r2
FBgn0020510	0.4622	2.92575e-05	0.000251741	protein_coding	Abi
FBgn0020513	-0.496635	0.0273419	0.0779649	protein_coding	Paics
FBgn0020521	-1.1522	1.13454e-09	3.06228e-08	protein_coding	pio
FBgn0020545	0.0709216	0.611316	0.742852	protein_coding	kraken
FBgn0020616	-0.129658	0.170869	0.310215	protein_coding	SA
FBgn0020618	-0.82542	8.10167e-10	2.27212e-08	protein_coding	Rack1
FBgn0020620	0.241735	0.00613319	0.0233406	protein_coding	RN-tre
FBgn0020621	0.355629	0.000859925	0.0045654	protein_coding	Pkn
FBgn0020622	1.38909	3.50517e-11	1.38707e-09	protein_coding	Pi3K21B
FBgn0020626	0.381363	4.78018e-05	0.000383874	protein_coding	Osbp
FBgn0020633	1.22003	3.48499e-05	0.000293613	protein_coding	Mcm7
FBgn0020647	0.255841	0.177211	0.317106	protein_coding	KrT95D
FBgn0020653	0.299774	0.0145009	0.0470059	protein_coding	Trxr-1
FBgn0020655	0.0417931	0.648764	0.771134	protein_coding	ArfGAP1
FBgn0020660	-0.0223848	0.742386	0.838146	protein_coding	eIF4B
FBgn0020762	0.58018	0.0127756	0.0423542	protein_coding	Atet
FBgn0020764	0.0803099	0.618413	0.748686	protein_coding	Alas
FBgn0020767	0.394367	0.00180291	0.00852959	protein_coding	Spred
FBgn0020880	-0.703851	0.0531561	0.130675	protein_coding	CG7179
FBgn0020887	0.121579	0.395975	0.55735	protein_coding	Su(z)12
FBgn0020906	0.619634	0.0114254	0.0385066	protein_coding	Jon25Bi
FBgn0020907	0.812245	0.00355131	0.0149665	protein_coding	Scp2
FBgn0020908	-1.01721	0.00070673	0.00389495	protein_coding	Scp1
FBgn0020909	-0.171815	0.362449	0.526344	protein_coding	Rtc1
FBgn0020910	-0.806399	2.27267e-07	3.4123e-06	protein_coding	RpL3
FBgn0020912	-0.161549	0.0103124	0.0353035	protein_coding	Ptx1
FBgn0020930	-0.187469	0.204736	0.353119	protein_coding	Dgkepsilon
FBgn0021750	-0.421754	0.00848943	0.0302837	protein_coding	SerRS-m
FBgn0021760	-0.0512539	0.581488	0.718893	protein_coding	chb
FBgn0021761	-0.397141	5.71137e-05	0.000446347	protein_coding	Nup154
FBgn0021764	0.759441	4.82008e-12	2.29667e-10	protein_coding	sdk
FBgn0021765	0.275374	0.0614732	0.146193	protein_coding	scu
FBgn0021767	0.267244	0.291305	0.453416	protein_coding	org-1
FBgn0021768	0.00446987	0.959367	0.97628	protein_coding	nudC
FBgn0021776	-0.101896	0.674019	0.789696	protein_coding	mira
FBgn0021795	-0.305171	0.0198355	0.060242	protein_coding	Tapdelta
FBgn0021796	-0.0399532	0.70669	0.812865	protein_coding	Tor
FBgn0021800	-0.523459	0.00836302	0.0299128	protein_coding	Reph
FBgn0021814	0.492896	5.21637e-07	7.22785e-06	protein_coding	Vps28
FBgn0021825	0.308333	0.00829325	0.0297201	protein_coding	DCTN2-p50
FBgn0021847	-0.136818	0.151782	0.283952	protein_coding	Ttc7
FBgn0021856	-0.0806532	0.538209	0.684413	protein_coding	l(2)k14505
FBgn0021872	-0.0797389	0.491223	0.643593	protein_coding	Xbp1
FBgn0021874	-0.222436	0.156937	0.291437	protein_coding	Nle
FBgn0021875	-0.204235	0.214806	0.365472	protein_coding	Zfrp8
FBgn0021895	-0.0846135	0.379708	0.541884	protein_coding	ytr
FBgn0021906	-0.230332	0.0547318	0.133771	protein_coding	RFeSP
FBgn0021944	-0.402986	0.000313298	0.00194025	protein_coding	Coprox
FBgn0021967	-0.25793	0.00474428	0.0189265	protein_coding	ND-PDSW
FBgn0021979	-0.156697	0.0292537	0.0824133	protein_coding	l(2)k09913
FBgn0021995	-0.356563	0.000828879	0.00443605	protein_coding	Rs1
FBgn0022023	-0.545859	6.71864e-07	8.97645e-06	protein_coding	eIF3h
FBgn0022027	0.474893	0.00412914	0.0169132	protein_coding	Vps25
FBgn0022029	-0.397657	0.00204685	0.00946107	protein_coding	l(2)k01209
FBgn0022069	-0.240919	0.0629718	0.148583	protein_coding	Nnp-1
FBgn0022097	-0.15106	0.0794065	0.175896	protein_coding	Vha36-1
FBgn0022153	0.066508	0.486909	0.640366	protein_coding	l(2)k05819
FBgn0022160	-0.168832	0.36416	0.527516	protein_coding	Gpo1
FBgn0022213	0.11998	0.21998	0.371701	protein_coding	Cse1
FBgn0022224	0.364143	0.0518887	0.128266	protein_coding	ubl
FBgn0022238	-0.144076	0.0905286	0.194177	protein_coding	lolal
FBgn0022288	-0.430678	0.00109253	0.00555726	protein_coding	l(2)09851
FBgn0022338	1.14954	6.98027e-11	2.55642e-09	protein_coding	dnk
FBgn0022343	-0.3206	0.00134648	0.00665334	protein_coding	CG3760
FBgn0022344	-0.108281	0.314941	0.479028	protein_coding	CG10340
FBgn0022349	0.0515623	0.566844	0.706776	protein_coding	CG1910
FBgn0022355	0.866366	0.00795622	0.0287997	protein_coding	Tsf1
FBgn0022359	-0.0484117	0.870235	0.922713	protein_coding	Sodh-2
FBgn0022361	0.345011	0.00264694	0.0117211	protein_coding	Pur-alpha
FBgn0022382	0.120484	0.123696	0.243971	protein_coding	Pka-R2
FBgn0022699	-0.297534	0.0612557	0.145951	protein_coding	D19B
FBgn0022700	-0.404032	0.248214	0.404973	protein_coding	Cht4
FBgn0022702	-0.107181	0.697038	0.805448	protein_coding	Cht2
FBgn0022709	0.00973495	0.969396	0.982334	protein_coding	Adk1
FBgn0022710	-0.651746	7.58575e-05	0.00057224	protein_coding	Ac13E
FBgn0022724	-0.0724121	0.729636	0.829417	protein_coding	Taf8
FBgn0022740	0.0108376	0.975954	0.985984	protein_coding	HLH54F
FBgn0022764	-0.301671	0.00118608	0.00596812	protein_coding	Sin3A
FBgn0022768	0.0570255	0.679976	0.793687	protein_coding	Pp2C1
FBgn0022770	-1.68956	9.4301e-08	1.57569e-06	protein_coding	Peritrophin-A
FBgn0022772	0.711382	0.00920003	0.0322762	NA	NA
FBgn0022774	0.392216	0.113444	0.228528	protein_coding	Oat
FBgn0022786	-0.204263	0.180002	0.320624	protein_coding	Hira
FBgn0022787	0.00644242	0.962659	0.978112	protein_coding	Hel89B
FBgn0022800	-0.657834	0.0484422	0.121515	protein_coding	Cad96Ca
FBgn0022893	0.760205	2.14707e-06	2.51903e-05	protein_coding	Df31
FBgn0022935	-0.349745	0.0140487	0.0458228	protein_coding	D19A
FBgn0022936	0.24555	0.190176	0.333845	protein_coding	CycH
FBgn0022942	0.0925844	0.353944	0.518264	protein_coding	Cbp80
FBgn0022943	0.0310709	0.829116	0.894435	protein_coding	Cbp20
FBgn0022959	-0.138002	0.182385	0.323573	protein_coding	yps
FBgn0022960	0.417911	0.000755527	0.00410225	protein_coding	vimar
FBgn0022984	0.0545875	0.554114	0.696671	protein_coding	qkr58E-3
FBgn0022985	0.0700057	0.431568	0.588898	protein_coding	qkr58E-2
FBgn0022986	0.199964	0.124813	0.24555	protein_coding	qkr58E-1
FBgn0022987	0.192512	0.198288	0.344972	protein_coding	qkr54B
FBgn0023000	-0.117696	0.501282	0.65129	protein_coding	mth
FBgn0023001	0.154632	0.309373	0.47347	protein_coding	melt
FBgn0023023	-0.810766	8.44018e-05	0.000629575	protein_coding	CRMP
FBgn0023076	-0.746367	2.88004e-05	0.000248124	protein_coding	Clk
FBgn0023081	0.0481283	0.643884	0.76719	protein_coding	gek
FBgn0023083	0.0661542	0.737135	0.834589	protein_coding	fray
FBgn0023091	0.476999	0.141418	0.269036	protein_coding	dimm
FBgn0023094	0.0271003	0.769359	0.857506	protein_coding	cyc
FBgn0023095	0.616036	7.45345e-12	3.34653e-10	protein_coding	caps
FBgn0023097	-0.17895	0.0752209	0.16903	protein_coding	bon
FBgn0023129	-0.421075	0.122803	0.242568	protein_coding	aay
FBgn0023130	0.0165901	0.920647	0.953312	protein_coding	a6
FBgn0023143	0.363861	1.8843e-08	3.80075e-07	protein_coding	Uba1
FBgn0023167	0.0646738	0.594281	0.728059	protein_coding	SmD3
FBgn0023169	-0.0607728	0.415136	0.574874	protein_coding	AMPKalpha
FBgn0023170	-0.432888	0.000339013	0.00207066	protein_coding	RpL39
FBgn0023171	-0.73681	3.94525e-06	4.36032e-05	protein_coding	rnh1
FBgn0023172	0.356155	6.24582e-05	0.00048123	protein_coding	RhoGEF2
FBgn0023174	0.105288	0.296627	0.45925	protein_coding	Prosbeta2
FBgn0023175	0.26375	0.0159164	0.0508007	protein_coding	Prosalpha7
FBgn0023177	0.524693	1.17962e-09	3.13859e-08	protein_coding	Pp4-19C
FBgn0023179	-0.186939	0.352524	0.51667	protein_coding	amon
FBgn0023180	0.663179	0.00910498	0.0320478	protein_coding	Orc6
FBgn0023181	0.279918	0.181943	0.322973	protein_coding	Orc4
FBgn0023197	-0.981775	0.00219392	0.0100047	protein_coding	Jon74E
FBgn0023212	-0.0129041	0.897697	0.938561	protein_coding	EloB
FBgn0023213	0.0351249	0.665726	0.783716	protein_coding	eIF4G1
FBgn0023214	1.46097	1.45462e-11	6.23152e-10	protein_coding	edl
FBgn0023215	0.224427	0.0639115	0.150156	protein_coding	Mnt
FBgn0023216	0.041929	0.787561	0.869081	protein_coding	Parg
FBgn0023388	-0.146431	0.108253	0.220592	protein_coding	Dap160
FBgn0023395	0.610344	0.0648764	0.151736	protein_coding	Chd3
FBgn0023407	0.0940923	0.630179	0.758117	protein_coding	B4
FBgn0023441	-0.256029	0.0115775	0.038963	protein_coding	fus
FBgn0023458	0.306816	0.000362735	0.00218131	protein_coding	Rbcn-3A
FBgn0023477	-0.292501	0.00565484	0.0217686	protein_coding	Taldo
FBgn0023479	-0.648904	0.0622677	0.147294	protein_coding	teq
FBgn0023495	1.94597	9.72592e-11	3.41468e-09	protein_coding	Lip3
FBgn0023506	0.0935511	0.563848	0.704338	protein_coding	Es2
FBgn0023507	0.00565666	0.977118	0.986519	protein_coding	D2hgdh
FBgn0023508	0.363721	3.37861e-05	0.000286063	protein_coding	Ocrl
FBgn0023509	-0.464725	0.000315544	0.00195027	protein_coding	mip130
FBgn0023510	0.0875344	0.190575	0.334479	protein_coding	Rbcn-3B
FBgn0023511	-0.174215	0.108726	0.221266	protein_coding	Edem1
FBgn0023512	-0.0779477	0.565706	0.706017	protein_coding	eIF2Bepsilon
FBgn0023513	-0.196094	0.409348	0.570072	protein_coding	CG14803
FBgn0023514	-0.361626	0.00649218	0.024379	protein_coding	CG14805
FBgn0023515	-0.501163	0.036665	0.0982554	protein_coding	CG14814
FBgn0023516	-0.373811	0.0102624	0.0351855	protein_coding	Pex5
FBgn0023517	0.0677537	0.61703	0.747665	protein_coding	Pgam5
FBgn0023518	-0.12986	0.237352	0.392533	protein_coding	trr
FBgn0023519	0.165553	0.262643	0.42198	protein_coding	mRpL16
FBgn0023520	-0.27501	0.162747	0.300051	protein_coding	CG3857
FBgn0023521	-0.0668731	0.640284	0.764558	protein_coding	CG3587
FBgn0023522	-0.115051	0.339935	0.504233	protein_coding	CG11596
FBgn0023525	-0.312438	0.0203171	0.0613256	protein_coding	CG3191
FBgn0023526	0.164798	0.445804	0.603648	protein_coding	CG2865
FBgn0023527	-0.279098	0.0767674	0.171474	protein_coding	CG3071
FBgn0023528	0.406339	8.67613e-05	0.000645799	protein_coding	CG2924
FBgn0023529	-0.32478	0.0191682	0.0586732	protein_coding	CG2918
FBgn0023530	0.613944	7.85991e-05	0.000590536	protein_coding	CG3740
FBgn0023531	-0.460897	0.0164594	0.0520536	protein_coding	CG32809
FBgn0023534	0.301451	0.133434	0.257986	protein_coding	CG17778
FBgn0023535	-0.316875	0.389055	0.551241	protein_coding	arg
FBgn0023536	-0.0945992	0.463571	0.619988	protein_coding	CG3156
FBgn0023537	0.742847	1.9377e-06	2.29647e-05	protein_coding	CG17896
FBgn0023540	-0.782244	0.0189963	0.0582424	protein_coding	CG3630
FBgn0023541	-0.125438	0.618667	0.748896	protein_coding	Cyp4d14
FBgn0023542	-0.45056	9.57378e-07	1.22647e-05	protein_coding	Nmd3
FBgn0023545	-0.319607	0.00143842	0.00700023	protein_coding	PIG-K
FBgn0023549	-0.509098	0.000501531	0.00290198	protein_coding	Mct1
FBgn0023550	-0.574061	0.135778	0.261395	protein_coding	FarO
FBgn0024150	0.0757116	0.752124	0.845868	protein_coding	Ac78C
FBgn0024179	-0.890987	1.56224e-06	1.91467e-05	protein_coding	wit
FBgn0024182	-0.197806	0.309712	0.47377	protein_coding	waw
FBgn0024183	-0.0721156	0.395935	0.55735	protein_coding	vig
FBgn0024187	0.267274	0.0254711	0.0737138	protein_coding	syd
FBgn0024188	0.124171	0.357364	0.521961	protein_coding	san
FBgn0024191	-0.0657249	0.702411	0.809255	protein_coding	sip1
FBgn0024194	-0.220522	0.199292	0.346202	protein_coding	rasp
FBgn0024196	0.176512	0.310306	0.474374	protein_coding	robl
FBgn0024222	0.315464	0.0138197	0.0452215	protein_coding	IKKbeta
FBgn0024227	1.3192	1.00972e-05	9.8638e-05	protein_coding	aurB
FBgn0024230	0.310455	0.0838471	0.183298	protein_coding	Hs2st
FBgn0024234	0.28175	0.100478	0.209409	protein_coding	gbb
FBgn0024236	-0.524125	9.25212e-08	1.55127e-06	protein_coding	foi
FBgn0024238	0.429546	0.00370438	0.015465	protein_coding	Fim
FBgn0024244	-0.546996	0.00936308	0.032713	protein_coding	drm
FBgn0024245	0.368281	0.125366	0.246224	protein_coding	dnt
FBgn0024248	-0.260156	0.0383823	0.101775	protein_coding	chico
FBgn0024250	0.264426	0.135289	0.260669	protein_coding	brk
FBgn0024251	0.058783	0.575816	0.714434	protein_coding	bbx
FBgn0024273	0.462347	9.84917e-05	0.000720293	protein_coding	WASp
FBgn0024277	0.516388	6.58749e-07	8.85188e-06	protein_coding	trio
FBgn0024285	0.332591	0.000301665	0.00187692	protein_coding	Srp54
FBgn0024288	1.35394	1.91663e-10	6.30262e-09	protein_coding	Sox100B
FBgn0024289	-0.600373	0.00332421	0.0141748	protein_coding	Sodh-1
FBgn0024291	-0.135673	0.245173	0.401134	protein_coding	Sirt1
FBgn0024293	-0.573702	0.108404	0.220804	protein_coding	Spn43Ab
FBgn0024314	0.248955	0.0252703	0.0732463	protein_coding	Plap
FBgn0024315	-0.747524	3.93462e-06	4.35372e-05	protein_coding	Picot
FBgn0024319	1.0499	0.00104356	0.0053637	protein_coding	Nach
FBgn0024320	0.403006	0.00228557	0.0103407	protein_coding	Npc1a
FBgn0024321	0.654821	5.04415e-08	9.05909e-07	protein_coding	NK7.1
FBgn0024326	0.0817491	0.226817	0.379893	protein_coding	Mkk4
FBgn0024329	-0.0681534	0.670674	0.78706	protein_coding	Mekk1
FBgn0024330	-0.244838	0.136632	0.26242	protein_coding	MED6
FBgn0024352	0.0169372	0.893249	0.936257	protein_coding	Stip1
FBgn0024360	0.234997	0.191065	0.335154	protein_coding	MTPAP
FBgn0024361	0.710356	9.12342e-07	1.18174e-05	protein_coding	Tsp2A
FBgn0024362	0.142863	0.124603	0.245362	protein_coding	Naa30A
FBgn0024364	-0.453352	0.000571526	0.0032427	protein_coding	CG11417
FBgn0024365	0.128046	0.173149	0.312411	protein_coding	CG12773
FBgn0024366	-0.363646	0.231847	0.386233	protein_coding	CG11409
FBgn0024371	-0.117918	0.380569	0.542699	protein_coding	E2f2
FBgn0024432	0.318255	0.00134941	0.00666429	protein_coding	Dlc90F
FBgn0024491	0.279398	0.0168243	0.0528973	protein_coding	Bin1
FBgn0024509	-0.0608902	0.456426	0.613033	protein_coding	Sec13
FBgn0024510	0.733805	2.05883e-05	0.000185442	protein_coding	dlt
FBgn0024542	-0.0824493	0.679781	0.793559	protein_coding	Neos
FBgn0024555	-0.0800639	0.344669	0.509798	protein_coding	flfl
FBgn0024556	-0.138971	0.195451	0.341208	protein_coding	mEFTu1
FBgn0024558	-0.180119	0.151547	0.283684	protein_coding	Dph5
FBgn0024689	-0.104385	0.378142	0.540227	protein_coding	fws
FBgn0024698	0.00642993	0.962048	0.977646	protein_coding	Cpsf160
FBgn0024728	0.164076	0.0933526	0.198955	protein_coding	Slip1
FBgn0024732	-0.331112	0.192062	0.33646	protein_coding	Drep1
FBgn0024733	-0.339407	0.00270543	0.0119179	protein_coding	RpL10
FBgn0024734	0.247881	0.0193609	0.059166	protein_coding	PRL-1
FBgn0024754	0.110735	0.272063	0.432233	protein_coding	Flo1
FBgn0024804	0.394851	0.00156461	0.00753247	protein_coding	Dbp80
FBgn0024806	0.260461	0.0273834	0.078039	protein_coding	DIP2
FBgn0024807	-0.430396	6.53022e-05	0.000501115	protein_coding	DIP1
FBgn0024811	0.17116	0.108176	0.220484	protein_coding	Crk
FBgn0024814	0.23828	0.00387127	0.0160514	protein_coding	Clc
FBgn0024833	0.292461	0.00035292	0.00213605	protein_coding	AP-1mu
FBgn0024841	-0.208618	0.162458	0.299722	protein_coding	Pcd
FBgn0024846	-0.150376	0.020665	0.0621146	protein_coding	p38b
FBgn0024887	0.053219	0.730619	0.829775	protein_coding	kin17
FBgn0024889	-0.076016	0.353874	0.518241	protein_coding	Kap-alpha1
FBgn0024909	0.248518	0.230716	0.38476	protein_coding	Taf7
FBgn0024912	-0.14511	0.4436	0.601536	protein_coding	agt
FBgn0024913	-0.379458	0.243361	0.399359	protein_coding	Actbeta
FBgn0024920	1.72641	3.89877e-10	1.17454e-08	protein_coding	Ts
FBgn0024921	0.270694	0.000729066	0.00398638	protein_coding	Tnpo
FBgn0024945	-0.188848	0.258889	0.417648	protein_coding	NitFhit
FBgn0024947	0.180103	0.0732264	0.165584	protein_coding	NTPase
FBgn0024956	-0.0574694	0.721236	0.823227	protein_coding	Mat1
FBgn0024957	0.527956	4.83064e-06	5.20831e-05	protein_coding	Irp-1B
FBgn0024958	-0.0445945	0.584223	0.720938	protein_coding	Irp-1A
FBgn0024973	-0.112647	0.22224	0.37452	protein_coding	CG2701
FBgn0024975	-0.180831	0.527245	0.673589	protein_coding	CG2712
FBgn0024980	0.395407	0.0161306	0.0513617	protein_coding	Syx4
FBgn0024983	-0.0850903	0.658536	0.777604	protein_coding	CG4293
FBgn0024985	0.182054	0.0245074	0.0715457	protein_coding	Rilpl
FBgn0024986	0.844887	2.87957e-07	4.20966e-06	protein_coding	CG3719
FBgn0024987	-0.253243	0.0113846	0.0384108	protein_coding	ssx
FBgn0024989	-0.598334	0.124744	0.245466	protein_coding	CG3777
FBgn0024991	0.0349926	0.848942	0.907775	protein_coding	CG2694
FBgn0024992	0.000949644	0.99307	0.996163	protein_coding	Spg7
FBgn0024993	-0.57831	0.0370158	0.0989754	protein_coding	CG2662
FBgn0024994	0.0891496	0.491604	0.643874	protein_coding	Ugalt
FBgn0024995	0.54992	0.105162	0.216412	protein_coding	CG2680
FBgn0024996	-0.0470941	0.6559	0.77557	protein_coding	eIF2Bbeta
FBgn0024997	-0.442865	0.000326201	0.00200157	protein_coding	CG2681
FBgn0024998	-0.159219	0.36498	0.528325	protein_coding	CG2685
FBgn0025109	-0.039589	0.76196	0.852106	protein_coding	Bem46
FBgn0025111	0.404173	0.148808	0.279959	protein_coding	Ant2
FBgn0025185	-0.237909	0.36195	0.525918	protein_coding	az2
FBgn0025186	0.412319	0.0196758	0.0599027	protein_coding	ari-2
FBgn0025335	0.381473	0.000207998	0.00136029	protein_coding	Cpes
FBgn0025336	-0.226696	0.0617761	0.146615	protein_coding	CG4882
FBgn0025352	-0.023165	0.825776	0.891936	protein_coding	Mtpbeta
FBgn0025355	0.403515	0.00237019	0.0106933	protein_coding	SuUR
FBgn0025366	-0.720412	9.78379e-07	1.24653e-05	protein_coding	Ip259
FBgn0025373	0.127232	0.29101	0.453252	protein_coding	Fpps
FBgn0025381	0.332824	0.00259753	0.0115571	protein_coding	rush
FBgn0025383	-0.568536	0.090844	0.194764	protein_coding	CG14780
FBgn0025388	-0.55921	0.0297363	0.0835209	protein_coding	CG12179
FBgn0025390	-0.0183575	0.854545	0.912043	protein_coding	Mur2B
FBgn0025391	0.231941	0.473115	0.62889	protein_coding	Scgdelta
FBgn0025394	0.0350674	0.705528	0.811844	protein_coding	inc
FBgn0025454	-0.0321938	0.89056	0.935247	protein_coding	Cyp6g1
FBgn0025455	-0.171009	0.172433	0.312092	protein_coding	CycT
FBgn0025456	0.602935	0.000347755	0.00211438	protein_coding	CREG
FBgn0025457	0.137127	0.383659	0.546022	protein_coding	Bub3
FBgn0025463	-0.208481	0.0392717	0.103633	protein_coding	Bap60
FBgn0025469	0.226326	0.10564	0.21693	protein_coding	slv
FBgn0025519	0.0218913	0.876203	0.925977	protein_coding	fidipidine
FBgn0025525	-0.888734	8.4342e-07	1.10783e-05	protein_coding	bab2
FBgn0025549	0.234834	0.117346	0.234516	protein_coding	unc-119
FBgn0025558	0.305617	0.19941	0.346343	protein_coding	CG4101
FBgn0025571	-0.296697	0.00844437	0.0301576	protein_coding	SF1
FBgn0025574	0.308601	0.0979721	0.205425	protein_coding	Pli
FBgn0025582	-0.455266	1.60704e-06	1.95418e-05	protein_coding	eIF3e
FBgn0025592	-0.297814	0.0144014	0.0467808	protein_coding	Gk1
FBgn0025595	-0.738467	0.0672047	0.155509	protein_coding	AkhR
FBgn0025608	0.0428506	0.616032	0.746952	protein_coding	Faf2
FBgn0025615	-0.239864	0.0103213	0.035308	protein_coding	Torsin
FBgn0025620	-1.61929	7.45791e-13	4.35309e-11	protein_coding	CG13360
FBgn0025621	-0.716334	6.34887e-08	1.098e-06	protein_coding	CG16989
FBgn0025624	0.233248	0.075631	0.169584	protein_coding	CG4025
FBgn0025625	0.0284952	0.892204	0.935818	protein_coding	Sik2
FBgn0025626	-0.375971	0.020869	0.0625266	protein_coding	CG4281
FBgn0025627	-0.202885	0.577272	0.715776	protein_coding	CG4194
FBgn0025628	-0.0872656	0.5395	0.685339	protein_coding	CG4199
FBgn0025629	-0.410392	0.00633603	0.0239563	protein_coding	CG4045
FBgn0025630	0.0552483	0.754423	0.846924	protein_coding	Rtca
FBgn0025631	-0.0688599	0.632562	0.759612	protein_coding	moody
FBgn0025632	-0.0770388	0.784197	0.867054	protein_coding	CG4313
FBgn0025633	0.381173	1.6246e-06	1.96785e-05	protein_coding	CG13366
FBgn0025634	-0.457133	0.0010895	0.00554486	protein_coding	CG13367
FBgn0025635	-0.100833	0.640693	0.764949	protein_coding	CG17829
FBgn0025637	0.450533	9.73302e-10	2.68132e-08	protein_coding	SkpA
FBgn0025638	0.325219	5.58243e-06	5.88424e-05	protein_coding	Roc1a
FBgn0025639	-0.194127	0.147389	0.278131	protein_coding	Hmt4-20
FBgn0025640	-0.13946	0.259316	0.417975	protein_coding	CG13369
FBgn0025641	0.920847	0.00826585	0.0296441	protein_coding	DAAM
FBgn0025642	0.524086	0.0770319	0.171961	protein_coding	CG32812
FBgn0025643	-0.720486	0.0482369	0.121065	protein_coding	CG3588
FBgn0025674	-0.00164221	0.985418	0.99179	protein_coding	CycK
FBgn0025676	0.0331035	0.835379	0.897975	protein_coding	CkIIalpha-i3
FBgn0025678	0.623279	2.08876e-07	3.16671e-06	protein_coding	CaBP1
FBgn0025680	0.199557	0.207349	0.3557	protein_coding	cry
FBgn0025681	0.357176	1.04159e-05	0.000101433	protein_coding	CG3558
FBgn0025682	-0.670211	0.00471911	0.0188744	protein_coding	scf
FBgn0025683	-0.0829466	0.377594	0.539776	protein_coding	CG3164
FBgn0025684	-0.377286	0.00287784	0.0125531	protein_coding	MFS18
FBgn0025686	-1.22327	0.000270664	0.00171372	protein_coding	Amnionless
FBgn0025692	0.954131	3.62102e-10	1.11131e-08	protein_coding	Lfg
FBgn0025693	-0.289986	0.000297741	0.00185993	protein_coding	ZnT41F
FBgn0025697	-0.679203	2.36048e-08	4.60219e-07	protein_coding	santa-maria
FBgn0025700	0.0290031	0.803917	0.879749	protein_coding	CG5885
FBgn0025702	-0.261838	0.363254	0.527162	protein_coding	Srpk79D
FBgn0025709	0.336356	0.334743	0.498988	protein_coding	CNT2
FBgn0025712	0.310598	0.311993	0.476173	protein_coding	CG13920
FBgn0025716	0.0963469	0.438599	0.596574	protein_coding	Bap55
FBgn0025720	0.109069	0.270243	0.430462	protein_coding	Ate1
FBgn0025724	0.163773	0.0701336	0.160455	protein_coding	beta'COP
FBgn0025725	-0.179922	0.0197618	0.0600569	protein_coding	alphaCOP
FBgn0025726	-1.2063	6.38864e-16	6.62928e-14	protein_coding	unc-13
FBgn0025739	-0.230071	0.448635	0.605725	protein_coding	pon
FBgn0025740	0.186004	0.0471507	0.119079	protein_coding	PlexB
FBgn0025741	0.281915	2.05914e-05	0.000185442	protein_coding	PlexA
FBgn0025742	0.314441	0.000256121	0.00162937	protein_coding	mtm
FBgn0025743	0.0707428	0.582607	0.719609	protein_coding	mbt
FBgn0025777	0.115642	0.24359	0.399619	protein_coding	homer
FBgn0025781	0.10713	0.58777	0.724066	protein_coding	Cdc16
FBgn0025790	-0.015417	0.898666	0.939299	protein_coding	TBPH
FBgn0025800	-0.322905	0.00252592	0.0112761	protein_coding	Smox
FBgn0025802	-0.0644032	0.574547	0.713315	protein_coding	Sbf
FBgn0025807	0.0592185	0.810253	0.882649	protein_coding	Rad9
FBgn0025808	-0.0461856	0.844649	0.905231	protein_coding	Rad17
FBgn0025809	0.214954	0.287884	0.449868	protein_coding	Paf-AHalpha
FBgn0025814	-0.0103637	0.93711	0.962992	protein_coding	Mgstl
FBgn0025815	0.888988	7.80848e-06	7.89214e-05	protein_coding	Mcm6
FBgn0025820	0.262929	0.0656259	0.15322	protein_coding	JTBR
FBgn0025825	0.00047771	0.997772	0.998377	protein_coding	HDAC3
FBgn0025830	-0.0150285	0.899228	0.939677	protein_coding	IntS8
FBgn0025832	0.312372	0.129293	0.252081	protein_coding	Fen1
FBgn0025835	0.681849	0.0341278	0.0930991	protein_coding	CG17707
FBgn0025836	-0.103777	0.197003	0.343184	protein_coding	RhoGAP1A
FBgn0025837	-0.180768	0.565465	0.705906	protein_coding	CG17636
FBgn0025839	0.0963512	0.501602	0.651494	protein_coding	ND-B14.5A
FBgn0025864	0.275311	0.00262864	0.0116662	protein_coding	Crag
FBgn0025865	0.513761	1.94139e-09	4.88696e-08	protein_coding	Cortactin
FBgn0025866	0.583871	0.000513155	0.00295824	protein_coding	CalpB
FBgn0025874	-0.141539	0.543478	0.688209	protein_coding	Meics
FBgn0025879	0.370985	0.0911984	0.195434	protein_coding	Timp
FBgn0025885	0.57914	6.96916e-08	1.19203e-06	protein_coding	Inos
FBgn0025936	0.0617763	0.465324	0.621964	protein_coding	Eph
FBgn0026015	-0.154976	0.207761	0.356146	protein_coding	Top3beta
FBgn0026056	-0.148128	0.280258	0.441197	protein_coding	Rlip
FBgn0026059	0.221672	0.139235	0.265913	protein_coding	Mhcl
FBgn0026060	-0.0348177	0.784238	0.867054	protein_coding	Mipp2
FBgn0026061	-1.34349	1.39603e-16	1.69318e-14	protein_coding	Mipp1
FBgn0026076	0.322017	0.000837394	0.00446626	protein_coding	UBL3
FBgn0026077	-0.933389	6.94021e-07	9.25923e-06	protein_coding	Gasp
FBgn0026079	-0.183543	0.0765322	0.171189	protein_coding	Nsun2
FBgn0026080	0.121037	0.352406	0.51667	protein_coding	Tip60
FBgn0026083	0.049485	0.540183	0.685431	protein_coding	tyf
FBgn0026084	0.768627	0.000114971	0.000816513	protein_coding	cib
FBgn0026085	0.0535938	0.870371	0.922713	protein_coding	dgt4
FBgn0026086	-0.0754411	0.484515	0.638116	protein_coding	Adar
FBgn0026088	0.0287294	0.834804	0.897879	protein_coding	CG14818
FBgn0026089	-0.113608	0.413596	0.57349	protein_coding	CG14817
FBgn0026090	0.291119	0.0127191	0.0421968	protein_coding	CG14812
FBgn0026143	0.188864	0.240498	0.396332	protein_coding	Cdc45
FBgn0026144	-0.402615	0.280289	0.441197	protein_coding	CBP
FBgn0026147	-0.474874	0.000123363	0.000866232	protein_coding	TTLL4A
FBgn0026148	-0.0490515	0.864036	0.918394	protein_coding	CG12253
FBgn0026149	-0.0537191	0.756912	0.848494	protein_coding	BCL7-like
FBgn0026150	-0.197898	0.0161554	0.0514231	protein_coding	ApepP
FBgn0026160	-0.797435	8.21203e-07	1.08017e-05	protein_coding	tna
FBgn0026179	0.269714	0.00602257	0.0229758	protein_coding	siz
FBgn0026181	0.605501	1.21414e-18	2.06161e-16	protein_coding	Rok
FBgn0026189	0.317061	0.0677659	0.156385	protein_coding	promL
FBgn0026192	0.229995	0.03645	0.0979023	protein_coding	par-6
FBgn0026196	-0.414855	0.0132393	0.0435995	protein_coding	nop5
FBgn0026199	-0.0509149	0.716746	0.820004	protein_coding	myo
FBgn0026206	-0.0717019	0.588654	0.724492	protein_coding	mei-P26
FBgn0026207	-0.208081	0.124404	0.245102	protein_coding	mbo
FBgn0026238	0.136724	0.256741	0.415114	protein_coding	gus
FBgn0026239	-0.565265	0.0010394	0.00535111	protein_coding	gukh
FBgn0026250	-0.247969	0.00993381	0.0343087	protein_coding	eIF1A
FBgn0026252	-0.397531	0.000183011	0.0012182	protein_coding	msk
FBgn0026257	0.184068	0.520107	0.6673	protein_coding	cav
FBgn0026259	-0.031959	0.790264	0.870568	protein_coding	eIF5B
FBgn0026261	0.104717	0.396338	0.557608	protein_coding	bonsai
FBgn0026262	0.0546999	0.519451	0.6671	protein_coding	bip2
FBgn0026263	0.557184	0.00776208	0.0282172	protein_coding	bip1
FBgn0026309	-0.0322036	0.881767	0.929648	protein_coding	aft
FBgn0026313	-0.00861784	0.921423	0.95371	protein_coding	X11L
FBgn0026314	0.424274	0.157529	0.29222	protein_coding	Ugt35B1
FBgn0026315	-0.306013	0.00027639	0.00174288	protein_coding	Ugt35A1
FBgn0026316	0.261275	0.00110771	0.00561613	protein_coding	Ubc10
FBgn0026317	-0.0910813	0.321856	0.485984	protein_coding	Tsc1
FBgn0026319	0.449281	0.0343239	0.0934438	protein_coding	Traf4
FBgn0026323	0.24663	0.00362796	0.0151935	protein_coding	Tak1
FBgn0026324	0.171143	0.307858	0.471852	protein_coding	Taf10b
FBgn0026326	-0.135143	0.27481	0.435214	protein_coding	Mad1
FBgn0026361	0.629405	0.0714253	0.162614	protein_coding	Sep5
FBgn0026369	0.410248	2.80235e-06	3.20724e-05	protein_coding	Sara
FBgn0026370	-0.0371549	0.647903	0.770601	NA	NA
FBgn0026371	0.48984	0.000691265	0.00382222	protein_coding	SAK
FBgn0026372	-0.582166	4.71959e-05	0.00038026	protein_coding	RpL23A
FBgn0026373	0.0587187	0.668414	0.785296	protein_coding	RpII33
FBgn0026374	0.742118	0.00182916	0.00863189	protein_coding	Rhp
FBgn0026375	0.442201	0.000260196	0.00165304	protein_coding	RhoGAPp190
FBgn0026376	-0.138855	0.617746	0.748265	protein_coding	Rgl
FBgn0026378	0.553569	1.15012e-05	0.000110732	protein_coding	Rep
FBgn0026379	0.133383	0.2321	0.386447	protein_coding	Pten
FBgn0026380	0.310057	0.00126965	0.00631712	protein_coding	Prosbeta3
FBgn0026393	0.0915269	0.745653	0.840412	protein_coding	Or43b
FBgn0026400	-0.0727871	0.48736	0.640599	protein_coding	Noa36
FBgn0026401	0.0755576	0.447673	0.604864	protein_coding	Nipped-B
FBgn0026402	-0.0376444	0.874987	0.925108	protein_coding	NiPp1
FBgn0026403	-1.06473	0.00105028	0.00539229	protein_coding	Ndg
FBgn0026404	0.899205	3.96578e-05	0.000325738	protein_coding	Dronc
FBgn0026409	-0.323464	0.00049848	0.00288612	protein_coding	Mpcp2
FBgn0026415	-0.770455	0.00370139	0.0154594	protein_coding	Idgf4
FBgn0026417	0.374728	0.0947904	0.201193	protein_coding	Hus1-like
FBgn0026418	0.0241672	0.763023	0.853193	protein_coding	Hsc70Cb
FBgn0026427	-0.0121089	0.926491	0.956995	protein_coding	Su(var)2-HP2
FBgn0026428	-0.0548456	0.830383	0.895172	protein_coding	HDAC6
FBgn0026430	0.137717	0.384662	0.546865	protein_coding	Grip84
FBgn0026431	0.0499336	0.772321	0.859737	protein_coding	Grip75
FBgn0026432	-0.0657401	0.730136	0.829632	protein_coding	Grip163
FBgn0026433	-0.443757	0.0434434	0.112108	protein_coding	Grip128
FBgn0026439	-1.41166	2.88251e-09	6.95602e-08	protein_coding	Eaat1
FBgn0026441	-0.0816333	0.597175	0.730422	protein_coding	ear
FBgn0026479	0.542145	1.53465e-08	3.21348e-07	protein_coding	Drp1
FBgn0026533	-0.295392	0.00691256	0.0257026	protein_coding	Dek
FBgn0026562	0.0179512	0.926475	0.956995	protein_coding	SPARC
FBgn0026563	0.304214	0.387032	0.549231	protein_coding	CG1979
FBgn0026565	-0.71426	4.95614e-12	2.33764e-10	protein_coding	Ass
FBgn0026566	-0.0877173	0.480043	0.634398	protein_coding	CG1307
FBgn0026570	0.16175	0.447209	0.604607	protein_coding	CG5704
FBgn0026573	-0.251582	0.0299818	0.0840355	protein_coding	ADD1
FBgn0026575	0.0606012	0.849409	0.908143	protein_coding	hang
FBgn0026576	-0.229565	0.0723994	0.164215	protein_coding	Pisd
FBgn0026577	0.0734141	0.401269	0.562174	protein_coding	CG8677
FBgn0026582	0.50705	0.0205407	0.0618607	protein_coding	Hmg-2
FBgn0026592	0.303685	0.178815	0.319242	protein_coding	Fie
FBgn0026593	-0.136619	0.360205	0.524858	protein_coding	CG5707
FBgn0026597	-0.146742	0.112227	0.226613	protein_coding	Axn
FBgn0026598	0.220478	0.166192	0.304284	protein_coding	Apc2
FBgn0026602	0.133706	0.657238	0.776792	protein_coding	Ady43A
FBgn0026616	-0.509151	0.112374	0.226764	protein_coding	alpha-Man-IIb
FBgn0026619	-0.354338	0.0235933	0.0692232	protein_coding	Taz
FBgn0026620	0.720488	1.72437e-08	3.53156e-07	protein_coding	tacc
FBgn0026630	0.11855	0.102952	0.212902	protein_coding	nes
FBgn0026634	0.261996	0.0157623	0.0505151	protein_coding	Cog2
FBgn0026666	-0.169488	0.26405	0.423563	protein_coding	MagR
FBgn0026679	-0.0817036	0.511169	0.659548	protein_coding	IntS4
FBgn0026702	0.0551912	0.794503	0.872655	protein_coding	Pop1
FBgn0026713	0.377569	0.000299524	0.00186608	protein_coding	l(1)G0007
FBgn0026718	0.47448	0.0331008	0.0909201	protein_coding	Agpat2
FBgn0026721	-0.476134	0.181752	0.322696	protein_coding	fat-spondin
FBgn0026722	-0.24328	0.142982	0.271514	protein_coding	drosha
FBgn0026737	0.282762	0.219799	0.371617	protein_coding	CG6171
FBgn0026738	-0.125897	0.526857	0.673279	protein_coding	CG7857
FBgn0026741	-0.0568078	0.633099	0.759935	protein_coding	mRpL18
FBgn0026749	0.0843689	0.510682	0.659283	protein_coding	Yippee
FBgn0026751	-0.0531338	0.786053	0.868135	protein_coding	XRCC1
FBgn0026755	-2.63304	5.85747e-20	1.27216e-17	protein_coding	Ugt37B1
FBgn0026756	0.489653	0.0459589	0.116789	protein_coding	Ugt37A1
FBgn0026760	-0.114878	0.284132	0.445728	protein_coding	Tehao
FBgn0026761	-0.276898	0.0181592	0.0563419	protein_coding	Trap1
FBgn0026777	0.407219	3.33806e-06	3.75141e-05	protein_coding	Rad23
FBgn0026778	0.418873	0.202958	0.350809	protein_coding	Rad1
FBgn0026787	-0.210416	0.00523199	0.0204527	protein_coding	Nhe1
FBgn0026869	-0.189966	0.064248	0.150757	protein_coding	Thd1
FBgn0026872	0.26465	0.0978379	0.20528	protein_coding	CG14777
FBgn0026873	0.115464	0.494926	0.646359	protein_coding	MED18
FBgn0026876	-0.0187147	0.952521	0.972196	protein_coding	CG11403
FBgn0026878	0.478734	0.13003	0.253306	protein_coding	CG4325
FBgn0026879	-0.0799414	0.348302	0.513464	protein_coding	CG13364
FBgn0027052	0.0673273	0.503279	0.653067	protein_coding	STUB1
FBgn0027053	0.106111	0.385807	0.547993	protein_coding	CSN5
FBgn0027054	-0.21754	0.0648203	0.15168	protein_coding	CSN4
FBgn0027055	0.171738	0.0954372	0.202014	protein_coding	CSN3
FBgn0027057	0.0867892	0.457536	0.613838	protein_coding	CSN1b
FBgn0027066	0.700216	4.0953e-13	2.48351e-11	protein_coding	Eb1
FBgn0027070	0.864541	0.00694112	0.0257643	protein_coding	Ugt36E1
FBgn0027073	-0.00741901	0.955978	0.973915	protein_coding	Ugt49B1
FBgn0027079	0.205544	0.0525826	0.129536	protein_coding	ValRS
FBgn0027080	0.0378821	0.681936	0.795289	protein_coding	TyrRS
FBgn0027081	0.310461	0.00210169	0.00966406	protein_coding	ThrRS
FBgn0027082	-0.0295531	0.870447	0.922713	protein_coding	ProRS-m
FBgn0027083	0.314071	0.0733894	0.165872	protein_coding	MetRS-m
FBgn0027084	-0.0812729	0.425057	0.583836	protein_coding	LysRS
FBgn0027085	0.378666	0.00146605	0.00712724	protein_coding	LeuRS-m
FBgn0027086	-0.413412	6.19523e-05	0.000478555	protein_coding	IleRS
FBgn0027087	0.138736	0.166234	0.304284	protein_coding	HisRS
FBgn0027088	0.0846948	0.259674	0.418317	protein_coding	GlyRS
FBgn0027090	-0.00400984	0.96299	0.97812	protein_coding	GlnRS
FBgn0027091	-0.147118	0.155958	0.290245	protein_coding	CysRS
FBgn0027093	0.179862	0.0671266	0.155441	protein_coding	ArgRS
FBgn0027094	-0.00686202	0.925018	0.956473	protein_coding	AlaRS
FBgn0027095	0.381562	0.000520853	0.00299338	protein_coding	Manf
FBgn0027101	0.426609	0.00263477	0.0116783	protein_coding	Dyrk3
FBgn0027106	-0.124349	0.307949	0.471852	protein_coding	Inx7
FBgn0027108	-0.5351	2.28259e-11	9.43235e-10	protein_coding	Inx2
FBgn0027109	-0.466307	0.00280302	0.0122783	protein_coding	NPF
FBgn0027259	0.530589	0.0815024	0.179221	protein_coding	Kmn1
FBgn0027279	0.181856	0.0521905	0.128875	protein_coding	l(1)G0196
FBgn0027280	0.293771	0.128195	0.250253	protein_coding	l(1)G0193
FBgn0027287	0.154119	0.226821	0.379893	protein_coding	Gmap
FBgn0027291	-0.24999	0.0294025	0.0827827	protein_coding	Idh3a
FBgn0027296	-0.496907	0.00278057	0.0122086	protein_coding	temp
FBgn0027329	0.166656	0.109837	0.222848	protein_coding	CCT6
FBgn0027330	-0.136578	0.31245	0.476559	protein_coding	l(1)G0020
FBgn0027334	-0.720809	2.69323e-06	3.09373e-05	protein_coding	l(1)G0004
FBgn0027335	0.49225	1.86118e-07	2.89211e-06	protein_coding	Rip11
FBgn0027338	-0.273026	5.10599e-05	0.000405483	protein_coding	Kap-alpha3
FBgn0027339	-0.337923	0.0120018	0.0400877	protein_coding	jim
FBgn0027341	-0.209711	0.275475	0.435898	NA	NA
FBgn0027342	0.0976833	0.369143	0.532338	protein_coding	fz4
FBgn0027343	-1.15677	6.03338e-08	1.05516e-06	protein_coding	fz3
FBgn0027348	-0.709945	0.000668161	0.00371647	protein_coding	bgm
FBgn0027356	-0.404379	0.143702	0.272549	protein_coding	Amph
FBgn0027358	-0.01107	0.942239	0.965759	protein_coding	Tim9b
FBgn0027359	-0.088578	0.478491	0.633452	protein_coding	Tim8
FBgn0027360	-0.140078	0.117712	0.234896	protein_coding	Tim10
FBgn0027363	0.657695	1.61496e-11	6.85549e-10	protein_coding	Stam
FBgn0027375	-0.483357	0.00193115	0.00903103	protein_coding	RecQ5
FBgn0027378	-0.0868186	0.515056	0.662574	protein_coding	MRG15
FBgn0027453	0.202474	0.204811	0.353119	protein_coding	Dnz1
FBgn0027490	-0.27906	0.277704	0.438606	protein_coding	D12
FBgn0027492	0.391363	0.00119306	0.00599674	protein_coding	wdb
FBgn0027493	-0.279959	0.0318045	0.0880066	protein_coding	AdSS
FBgn0027495	0.00690979	0.958375	0.975924	protein_coding	Smyd4-4
FBgn0027496	0.302987	0.033506	0.0917271	protein_coding	epsilonCOP
FBgn0027497	0.180156	0.0615016	0.146193	protein_coding	Madm
FBgn0027498	-0.887285	9.38053e-05	0.000689801	protein_coding	CG2061
FBgn0027499	-0.457821	0.00487253	0.0193472	protein_coding	wde
FBgn0027500	0.126841	0.640019	0.76434	protein_coding	spd-2
FBgn0027503	-0.365694	0.0207245	0.0622335	protein_coding	CG11970
FBgn0027504	0.0598953	0.577917	0.71609	protein_coding	CG8878
FBgn0027505	0.389577	0.00241203	0.010835	protein_coding	Rab3-GAP
FBgn0027506	-0.226905	0.224169	0.376939	protein_coding	EDTP
FBgn0027507	-0.0352276	0.760145	0.851198	protein_coding	CG1344
FBgn0027508	0.170282	0.0646153	0.151391	protein_coding	Tnks
FBgn0027509	0.373545	0.000200667	0.00132033	protein_coding	TBCD
FBgn0027512	-0.475373	0.0164581	0.0520536	protein_coding	CG10254
FBgn0027513	0.241799	0.461865	0.618225	protein_coding	ana2
FBgn0027514	-0.0833082	0.696173	0.804788	protein_coding	CG1024
FBgn0027515	-0.0665517	0.666637	0.784151	protein_coding	CG7115
FBgn0027518	-0.35094	0.0564723	0.136844	protein_coding	Wdr24
FBgn0027521	0.609039	0.0673592	0.155748	protein_coding	CG3679
FBgn0027524	0.280405	0.0278548	0.0791519	protein_coding	CG3909
FBgn0027525	-0.677406	2.01721e-05	0.000182298	protein_coding	LTV1
FBgn0027526	-0.227626	0.196816	0.343058	protein_coding	Ublcp1
FBgn0027528	-0.120741	0.358339	0.52281	protein_coding	goe
FBgn0027529	0.0116677	0.937803	0.963174	protein_coding	tapas
FBgn0027532	-0.18714	0.0794539	0.175959	protein_coding	CG7139
FBgn0027535	-0.175645	0.134866	0.260227	protein_coding	botv
FBgn0027537	0.226275	0.0623341	0.147377	protein_coding	Nup93-1
FBgn0027538	0.952935	1.38698e-13	9.12182e-12	protein_coding	beta4GalNAcTA
FBgn0027539	-0.522407	0.00394099	0.0162721	protein_coding	lili
FBgn0027547	-0.464469	0.000183157	0.00121831	protein_coding	CG1927
FBgn0027548	0.15431	0.301625	0.464644	protein_coding	nito
FBgn0027549	-0.0404983	0.524499	0.671551	protein_coding	Nulp1
FBgn0027550	0.0913225	0.729716	0.829417	protein_coding	CG6495
FBgn0027552	0.0344424	0.809408	0.882346	protein_coding	CG10863
FBgn0027553	0.198896	0.150162	0.281712	protein_coding	NELF-B
FBgn0027554	0.252643	0.00776561	0.0282191	protein_coding	CG8042
FBgn0027556	0.468074	0.0690761	0.158658	protein_coding	CG4928
FBgn0027558	1.2719	3.21138e-08	5.98624e-07	protein_coding	Pgant3
FBgn0027560	0.578779	0.0999943	0.208774	protein_coding	Tps1
FBgn0027561	0.832784	1.76085e-08	3.5827e-07	protein_coding	CG18659
FBgn0027562	-0.434599	0.206479	0.354795	protein_coding	CG10345
FBgn0027563	-0.358179	0.312995	0.477078	protein_coding	CG9631
FBgn0027564	0.36523	0.00542595	0.0210962	protein_coding	CG3149
FBgn0027565	-0.314577	0.040961	0.107153	protein_coding	CG5498
FBgn0027567	-0.29501	0.0015317	0.00740784	protein_coding	CG8108
FBgn0027568	0.0628235	0.519943	0.6673	protein_coding	Cand1
FBgn0027569	0.855837	3.76772e-10	1.14243e-08	protein_coding	cert
FBgn0027570	1.74517	9.96024e-07	1.26728e-05	protein_coding	Nep2
FBgn0027572	-0.251186	0.324281	0.487955	protein_coding	CG5009
FBgn0027574	-0.144657	0.439144	0.597087	protein_coding	CG5815
FBgn0027575	-0.983049	0.00252896	0.0112843	protein_coding	GABA-B-R2
FBgn0027578	-0.223563	0.545439	0.68985	protein_coding	Nepl21
FBgn0027579	-0.32425	0.0208973	0.0625914	protein_coding	mino
FBgn0027580	0.136805	0.495615	0.647078	protein_coding	PCB
FBgn0027581	0.230863	0.0139824	0.0456419	protein_coding	CG6191
FBgn0027582	-0.220149	0.00811337	0.0291763	protein_coding	CG6230
FBgn0027583	-0.107031	0.330324	0.493899	protein_coding	CG7601
FBgn0027585	-0.399911	0.137174	0.262912	protein_coding	CG8740
FBgn0027586	-0.185984	0.38357	0.545978	protein_coding	CG5867
FBgn0027587	0.0781735	0.498919	0.649666	protein_coding	CG7028
FBgn0027588	0.0110005	0.886832	0.933198	protein_coding	GCS2alpha
FBgn0027590	-0.0261249	0.828301	0.893913	protein_coding	GstE12
FBgn0027592	-0.321247	0.0727587	0.164766	protein_coding	MED15
FBgn0027594	0.569729	1.14965e-05	0.000110732	protein_coding	drpr
FBgn0027596	-0.428609	0.013762	0.04508	protein_coding	Kank
FBgn0027597	0.265684	0.0346423	0.0940477	protein_coding	CG17712
FBgn0027598	0.66323	2.71956e-07	3.9934e-06	protein_coding	cindr
FBgn0027599	-0.419896	0.00107609	0.00549156	protein_coding	CG2790
FBgn0027601	1.35027	1.29546e-17	1.89035e-15	protein_coding	pdgy
FBgn0027602	-0.534594	0.00359778	0.0150874	protein_coding	CG8611
FBgn0027603	-0.0241472	0.815475	0.885848	protein_coding	Ulp1
FBgn0027607	-0.136065	0.0476286	0.119893	protein_coding	CG8230
FBgn0027608	-0.668545	0.0144959	0.0470059	protein_coding	CG2082
[truncated: 7,340 more rows]

## Sheet: Senolytic_OKSM vs. Control
gene_id	log2FoldChange	pvalue	padj	gene_biotype	external_gene_name
FBgn0000003	0.34046	0.297695	0.495046	ncRNA	7SLRNA:CR32864
FBgn0000008	1.35507	1.33405e-10	7.37199e-09	protein_coding	a
FBgn0000014	-0.412652	0.169872	0.343178	protein_coding	abd-A
FBgn0000015	-0.281987	0.453782	0.641421	protein_coding	Abd-B
FBgn0000017	-0.148132	0.249642	0.443486	protein_coding	Abl
FBgn0000018	0.0532857	0.698919	0.822423	protein_coding	abo
FBgn0000024	-0.0879444	0.645106	0.78579	protein_coding	Ace
FBgn0000032	0.196739	0.0521293	0.149382	protein_coding	Acph-1
FBgn0000042	0.550924	0.00100657	0.00681185	protein_coding	Act5C
FBgn0000043	1.28664	5.87821e-07	1.21993e-05	protein_coding	Act42A
FBgn0000044	0.618073	0.00644108	0.0304361	protein_coding	Act57B
FBgn0000045	-0.354089	0.288068	0.484734	protein_coding	Act79B
FBgn0000046	0.654772	0.00844098	0.0376458	protein_coding	Act87E
FBgn0000052	-0.243404	0.127049	0.280566	protein_coding	Pfas
FBgn0000053	0.106752	0.570207	0.733191	protein_coding	Gart
FBgn0000055	0.151225	0.55956	0.724589	protein_coding	Adh
FBgn0000056	0.263351	0.441953	0.632358	protein_coding	Adhr
FBgn0000057	0.218563	0.114777	0.262078	protein_coding	adp
FBgn0000063	0.105861	0.770401	0.867572	protein_coding	Mps1
FBgn0000064	-0.0448089	0.390666	0.587509	protein_coding	Ald1
FBgn0000075	-0.604263	0.056624	0.158898	protein_coding	amd
FBgn0000077	0.151968	0.368604	0.56577	protein_coding	amx
FBgn0000078	0.793416	0.00521706	0.0258677	protein_coding	Amy-d
FBgn0000079	0.838901	0.00164543	0.0101296	protein_coding	Amy-p
FBgn0000083	0.400441	0.0164993	0.0627134	protein_coding	AnxB9
FBgn0000084	1.25022	4.32283e-19	1.15346e-16	protein_coding	AnxB10
FBgn0000097	0.219333	0.0229167	0.0802169	protein_coding	aop
FBgn0000100	-0.737242	2.67626e-08	7.76198e-07	protein_coding	RpLP0
FBgn0000108	-0.154345	0.478668	0.660766	protein_coding	Appl
FBgn0000109	0.422896	0.00119886	0.00785694	protein_coding	Aprt
FBgn0000114	-0.683993	0.0699877	0.184117	protein_coding	bru1
FBgn0000115	0.0920536	0.381341	0.577765	protein_coding	Arl1
FBgn0000116	0.0709397	0.622926	0.769979	protein_coding	Argk
FBgn0000117	0.0655321	0.336318	0.53208	protein_coding	arm
FBgn0000119	-0.215839	0.0619643	0.169008	protein_coding	arr
FBgn0000120	-2.60554	2.99466e-11	1.87699e-09	protein_coding	Arr1
FBgn0000121	-1.15742	0.00330849	0.0179119	protein_coding	Arr2
FBgn0000139	-0.285275	0.0072388	0.0332014	protein_coding	ash2
FBgn0000140	0.563379	0.0928574	0.22586	protein_coding	asp
FBgn0000146	-0.475499	0.190824	0.37137	protein_coding	aub
FBgn0000147	0.104095	0.759254	0.861459	protein_coding	aurA
FBgn0000150	-0.0725689	0.414192	0.608102	protein_coding	awd
FBgn0000152	0.136667	0.509695	0.685336	protein_coding	Axs
FBgn0000153	-0.809017	0.055008	0.155767	protein_coding	b
FBgn0000163	0.316912	0.0170594	0.064241	protein_coding	baz
FBgn0000173	0.0788548	0.431011	0.623484	protein_coding	ben
FBgn0000180	0.428813	0.0906433	0.222475	protein_coding	bib
FBgn0000181	-0.32896	1.61803e-05	0.000212529	protein_coding	bic
FBgn0000182	-0.222776	0.564987	0.729024	protein_coding	BicC
FBgn0000183	0.166799	0.0102365	0.0439735	protein_coding	BicD
FBgn0000212	-0.0633917	0.574852	0.736123	protein_coding	brm
FBgn0000221	-0.0615123	0.766561	0.865915	protein_coding	brn
FBgn0000228	-0.143762	0.174759	0.35033	protein_coding	Bsg25D
FBgn0000229	0.0244994	0.818528	0.899109	protein_coding	bsk
FBgn0000239	0.0615995	0.484255	0.665851	protein_coding	bur
FBgn0000241	1.1248	1.07701e-06	2.05689e-05	protein_coding	bw
FBgn0000244	-0.210881	0.215121	0.402027	protein_coding	by
FBgn0000246	0.0393665	0.86273	0.923442	protein_coding	c(3)G
FBgn0000247	-0.0209556	0.791597	0.8804	protein_coding	ca
FBgn0000250	-0.0662584	0.552713	0.720316	protein_coding	cact
FBgn0000251	-0.210257	0.319473	0.516275	protein_coding	cad
FBgn0000253	0.222139	0.0318597	0.10342	protein_coding	Cam
FBgn0000256	-0.243074	0.182008	0.360199	protein_coding	capu
FBgn0000257	0.10804	0.307321	0.503939	protein_coding	car
FBgn0000259	0.0635098	0.515944	0.690415	protein_coding	CkIIbeta
FBgn0000261	0.121631	0.422454	0.615108	protein_coding	Cat
FBgn0000273	-0.000837746	0.990986	0.994582	protein_coding	Pka-C1
FBgn0000276	0.885299	0.0104566	0.0446008	protein_coding	CecA1
FBgn0000283	-0.282494	0.000621919	0.0046023	protein_coding	Cp190
FBgn0000286	-0.0742241	0.473888	0.657794	protein_coding	Cf2
FBgn0000289	-0.103537	0.158052	0.326342	protein_coding	cg
FBgn0000299	-0.462773	0.0727855	0.189396	protein_coding	Col4a1
FBgn0000307	0.280807	0.0069876	0.0323536	protein_coding	chif
FBgn0000308	0.560939	1.68541e-08	5.1104e-07	protein_coding	chic
FBgn0000316	0.0164939	0.882787	0.935475	protein_coding	cin
FBgn0000317	0.197253	0.0966651	0.232609	protein_coding	ck
FBgn0000318	0.323699	0.00518719	0.0257676	protein_coding	cl
FBgn0000319	0.110832	0.231471	0.421961	protein_coding	Chc
FBgn0000326	0.181673	0.145284	0.306775	protein_coding	clt
FBgn0000330	0.180604	0.151772	0.316867	protein_coding	cm
FBgn0000339	0.0788651	0.389294	0.585918	protein_coding	cni
FBgn0000346	-0.00583616	0.987458	0.993056	protein_coding	comt
FBgn0000352	-0.156905	0.411351	0.605837	protein_coding	cos
FBgn0000355	0.020103	0.116514	0.264479	protein_coding	Cp15
FBgn0000357	0.622404	0.00717768	0.0330145	protein_coding	Cp18
FBgn0000359	-0.0878425	0.79028	0.879773	protein_coding	Cp36
FBgn0000360	-0.142742	0.656163	0.793541	protein_coding	Cp38
FBgn0000370	-0.470364	4.99083e-09	1.77222e-07	protein_coding	crc
FBgn0000376	-0.373448	0.0389057	0.120232	protein_coding	crm
FBgn0000377	-0.0100076	0.946644	0.97279	protein_coding	crn
FBgn0000382	-0.168682	0.190293	0.370647	protein_coding	csw
FBgn0000384	0.00880199	0.945535	0.972292	protein_coding	cta
FBgn0000392	0.352598	0.0844483	0.211006	protein_coding	cup
FBgn0000394	0.147669	0.485287	0.666974	protein_coding	cv
FBgn0000395	0.790828	0.00549808	0.0269677	protein_coding	cv-2
FBgn0000404	0.661958	0.00913928	0.0400781	protein_coding	CycA
FBgn0000405	0.0574576	0.867589	0.925887	protein_coding	CycB
FBgn0000406	0.243127	0.505707	0.681894	protein_coding	Cyt-b5-r
FBgn0000412	-0.0184863	0.850211	0.917721	protein_coding	D1
FBgn0000414	0.0671778	0.823472	0.901677	protein_coding	Dab
FBgn0000416	-0.0046704	0.957432	0.977956	protein_coding	Sap-r
FBgn0000422	-0.870154	0.000395043	0.00315865	protein_coding	Ddc
FBgn0000426	0.199171	0.188406	0.368342	protein_coding	SmF
FBgn0000442	0.532913	0.0943825	0.228707	protein_coding	Pkg21D
FBgn0000447	-0.467383	6.51106e-05	0.000717908	protein_coding	Dhod
FBgn0000448	0.531553	0.0485461	0.141901	protein_coding	Hr3
FBgn0000449	-1.48223	3.01987e-07	6.65156e-06	protein_coding	dib
FBgn0000451	-0.262018	0.487689	0.668899	protein_coding	ect
FBgn0000454	0.161261	0.114805	0.262078	protein_coding	Dip-B
FBgn0000455	0.0886679	0.324761	0.52145	protein_coding	Dip-C
FBgn0000459	0.292734	0.357306	0.554199	protein_coding	disco
FBgn0000463	0.492878	0.00788535	0.0356617	protein_coding	Dl
FBgn0000464	-0.154586	0.212602	0.399094	protein_coding	Lar
FBgn0000473	-0.916286	1.12376e-07	2.76179e-06	protein_coding	Cyp6a2
FBgn0000477	0.614782	0.0198066	0.0718992	protein_coding	DNaseII
FBgn0000479	-0.521995	0.00116819	0.0076992	protein_coding	dnc
FBgn0000482	0.009932	0.916902	0.955459	protein_coding	dor
FBgn0000489	0.0605133	0.853919	0.919219	protein_coding	Pka-C3
FBgn0000490	-0.0303075	0.887258	0.937369	protein_coding	dpp
FBgn0000499	0.077413	0.468853	0.65294	protein_coding	dsh
FBgn0000504	0.134372	0.486351	0.668044	protein_coding	dsx
FBgn0000520	-0.128559	0.314723	0.511504	protein_coding	dwg
FBgn0000524	0.207766	0.150283	0.314331	protein_coding	dx
FBgn0000533	-0.520511	0.160802	0.329979	protein_coding	ea
FBgn0000536	0.250146	0.0165731	0.0628155	protein_coding	eas
FBgn0000541	-0.15473	0.122776	0.274216	protein_coding	E(bx)
FBgn0000542	-0.761808	0.0213973	0.0762124	protein_coding	ec
FBgn0000543	0.0729434	0.615993	0.765096	protein_coding	ecd
FBgn0000546	-0.252203	0.131353	0.288072	protein_coding	EcR
FBgn0000547	-0.0356738	0.867938	0.926045	protein_coding	ed
FBgn0000557	-0.722274	0.056576	0.158898	protein_coding	eEF1alpha2
FBgn0000559	-0.654955	6.93952e-09	2.34262e-07	protein_coding	eEF2
FBgn0000562	0.0642503	0.408698	0.602824	protein_coding	egl
FBgn0000565	0.3651	0.11887	0.267822	protein_coding	MsrA
FBgn0000566	0.264688	0.00468284	0.0237164	protein_coding	Eip55E
FBgn0000567	0.291889	0.0157966	0.0608597	protein_coding	Eip74EF
FBgn0000568	-0.0539949	0.742789	0.850924	protein_coding	Eip75B
FBgn0000575	0.0268122	0.845826	0.914467	protein_coding	emc
FBgn0000578	0.644947	5.43827e-05	0.000611167	protein_coding	ena
FBgn0000579	-0.181171	0.111554	0.257552	protein_coding	Eno
FBgn0000581	-0.252843	0.0476714	0.139893	protein_coding	E(Pc)
FBgn0000588	0.0779267	0.787105	0.878145	protein_coding	esc
FBgn0000592	0.824441	0.0248175	0.0852097	protein_coding	Est-6
FBgn0000611	-0.192132	0.0104382	0.0445737	protein_coding	exd
FBgn0000615	0.253672	0.0839307	0.210311	protein_coding	exu
FBgn0000617	0.0335943	0.841015	0.911482	protein_coding	e(y)1
FBgn0000618	0.353847	0.0703195	0.184781	protein_coding	e(y)2
FBgn0000629	-0.275128	0.0211227	0.075407	protein_coding	E(z)
FBgn0000633	0.118419	0.718286	0.835936	protein_coding	CG17716
FBgn0000635	0.400002	0.000814402	0.00574164	protein_coding	Fas2
FBgn0000636	0.255313	0.107886	0.251949	protein_coding	Fas3
FBgn0000644	0.369269	0.293629	0.490576	protein_coding	Fcp3C
FBgn0000659	0.22006	0.253433	0.447002	protein_coding	fkh
FBgn0000662	-0.135133	0.12448	0.276855	protein_coding	fl(2)d
FBgn0000667	0.0842351	0.59506	0.750935	protein_coding	Actn
FBgn0000709	0.124762	0.329135	0.525613	protein_coding	fliI
FBgn0000711	0.39294	0.0013861	0.00879401	protein_coding	flw
FBgn0000719	0.359615	0.0195826	0.0712155	protein_coding	fog
FBgn0000721	-0.44366	0.000241385	0.00210343	protein_coding	for
FBgn0000723	-0.424536	0.00143872	0.00906015	protein_coding	FER
FBgn0000810	0.165094	0.39949	0.595559	protein_coding	fs(1)K10
FBgn0000927	0.169414	0.619676	0.767455	protein_coding	fs(1)Ya
FBgn0000996	0.48185	0.00411205	0.0214277	protein_coding	dup
FBgn0001075	-0.639661	0.0583102	0.161927	protein_coding	ft
FBgn0001078	-0.307434	0.025593	0.0870087	protein_coding	ftz-f1
FBgn0001079	-0.0993887	0.668054	0.800585	protein_coding	fu
FBgn0001084	-0.106164	0.72767	0.842471	protein_coding	fy
FBgn0001085	-0.0560571	0.828052	0.904148	protein_coding	fz
FBgn0001086	0.448093	0.126248	0.279691	protein_coding	fzy
FBgn0001087	-0.156689	0.135768	0.294058	protein_coding	g
FBgn0001089	-0.352464	0.16746	0.339906	protein_coding	Gal
FBgn0001090	-0.0778968	0.834662	0.907464	protein_coding	bnb
FBgn0001091	-0.0581854	0.583621	0.743547	protein_coding	Gapdh1
FBgn0001092	-0.0182976	0.872267	0.928436	protein_coding	Gapdh2
FBgn0001098	-0.252027	0.243596	0.436314	protein_coding	Gdh
FBgn0001099	-0.132728	0.633921	0.777234	protein_coding	gdl
FBgn0001104	0.347935	4.66872e-05	0.000538286	protein_coding	Galphai
FBgn0001105	0.195776	0.00165907	0.0101847	protein_coding	Gbeta13F
FBgn0001108	0.149001	0.0741541	0.191942	protein_coding	DCTN1-p150
FBgn0001112	0.173508	0.557689	0.723459	protein_coding	Gld
FBgn0001114	0.234299	0.492807	0.67197	protein_coding	Glt
FBgn0001122	0.329556	0.0169789	0.0640412	protein_coding	Galphao
FBgn0001123	0.105921	0.151421	0.316216	protein_coding	Galphas
FBgn0001124	0.493669	2.37094e-07	5.37433e-06	protein_coding	Got1
FBgn0001125	0.134246	0.291656	0.488178	protein_coding	Got2
FBgn0001128	-0.128967	0.324694	0.52145	protein_coding	Gpdh1
FBgn0001133	0.0136407	0.907062	0.949525	protein_coding	grau
FBgn0001134	-0.496548	0.0524972	0.150206	protein_coding	Grd
FBgn0001137	0.15498	0.639124	0.781057	protein_coding	grk
FBgn0001139	-0.0120966	0.878457	0.932687	protein_coding	gro
FBgn0001142	-0.694909	0.000143717	0.0013923	protein_coding	Gs1
FBgn0001145	-0.938182	9.55107e-07	1.86216e-05	protein_coding	Gs2
FBgn0001149	1.82159	1.48362e-56	3.46388e-53	protein_coding	GstD1
FBgn0001168	0.488443	0.00174418	0.0106394	protein_coding	h
FBgn0001169	-0.0501754	0.677414	0.807386	protein_coding	H
FBgn0001170	0.245232	0.362467	0.559702	protein_coding	H2.0
FBgn0001179	0.29821	0.0796213	0.201865	protein_coding	hay
FBgn0001180	0.319007	0.339776	0.53628	protein_coding	hb
FBgn0001185	0.0867348	0.530177	0.701565	protein_coding	her
FBgn0001186	0.527124	0.000806323	0.00569611	protein_coding	Hex-A
FBgn0001187	0.296885	0.271983	0.466651	protein_coding	Hex-C
FBgn0001189	0.303518	0.00808116	0.0364061	protein_coding	hfw
FBgn0001197	0.255321	0.0253569	0.0865212	protein_coding	His2Av
FBgn0001202	0.162786	0.0641662	0.172843	protein_coding	hook
FBgn0001206	0.0816017	0.749089	0.854436	protein_coding	Hmr
FBgn0001208	-0.317449	0.412257	0.606788	protein_coding	Hn
FBgn0001215	-0.0885489	0.399526	0.595559	protein_coding	Hrb98DE
FBgn0001216	-0.739301	0.0585905	0.16256	protein_coding	Hsc70-1
FBgn0001217	0.687288	0.0180232	0.0670859	protein_coding	Hsc70-2
FBgn0001218	0.566698	4.84521e-06	7.55415e-05	protein_coding	Hsc70-3
FBgn0001220	0.0763062	0.333745	0.529446	protein_coding	Hsc70-5
FBgn0001222	-0.169584	0.112839	0.25975	protein_coding	Hsf
FBgn0001223	1.62733	3.72018e-08	1.03401e-06	protein_coding	Hsp22
FBgn0001224	2.3749	1.42627e-13	1.62438e-11	protein_coding	Hsp23
FBgn0001225	1.89065	3.72827e-10	1.81345e-08	protein_coding	Hsp26
FBgn0001226	0.989307	0.00154823	0.00961974	protein_coding	Hsp27
FBgn0001228	0.821829	0.00701096	0.0324296	protein_coding	CG4456
FBgn0001230	1.92612	2.23854e-10	1.15501e-08	protein_coding	Hsp68
FBgn0001233	0.0178241	0.952556	0.976255	protein_coding	Hsp83
FBgn0001234	0.426379	0.0765021	0.196494	ncRNA	lncRNA:Hsromega
FBgn0001235	-0.270478	0.197135	0.379518	protein_coding	hth
FBgn0001247	-0.0114401	0.90307	0.946987	protein_coding	Ide
FBgn0001248	0.070645	0.638387	0.780558	protein_coding	Idh
FBgn0001250	-0.177647	0.476797	0.660228	protein_coding	if
FBgn0001255	-0.140196	0.693251	0.818201	protein_coding	ImpE3
FBgn0001257	1.11088	8.85719e-05	0.000927323	protein_coding	ImpL2
FBgn0001258	0.533482	0.00662814	0.0310744	protein_coding	Ldh
FBgn0001259	-0.14895	0.641463	0.782985	protein_coding	in
FBgn0001276	-0.0289328	0.90416	0.947694	protein_coding	ix
FBgn0001280	0.0566387	0.639953	0.781661	protein_coding	janA
FBgn0001285	-0.0156112	0.95014	0.974588	protein_coding	Jon44E
FBgn0001291	0.177881	0.267787	0.462334	protein_coding	Jra
FBgn0001296	-0.399814	0.0644468	0.173462	protein_coding	kar
FBgn0001297	0.0890961	0.711767	0.830731	protein_coding	kay
FBgn0001301	0.227118	0.095798	0.231118	protein_coding	kel
FBgn0001308	0.208379	0.0557197	0.157121	protein_coding	Khc
FBgn0001316	-0.161276	0.273757	0.468138	protein_coding	klar
FBgn0001320	-0.468556	0.084612	0.211281	protein_coding	kni
FBgn0001321	-0.264281	0.484015	0.665851	protein_coding	knk
FBgn0001323	-0.574579	0.0402017	0.123177	protein_coding	knrl
FBgn0001324	-0.0525181	0.570715	0.733569	protein_coding	kto
FBgn0001330	-0.472326	0.0194157	0.0706361	protein_coding	kz
FBgn0001341	-0.344312	0.0326465	0.105133	protein_coding	Mybbp1A
FBgn0001404	-0.176163	0.0725155	0.188878	protein_coding	egh
FBgn0001491	0.0161124	0.890014	0.938873	protein_coding	l(1)10Bb
FBgn0001565	-0.449257	0.00112078	0.00743392	protein_coding	Hlc
FBgn0001612	0.0156985	0.937559	0.967392	protein_coding	Grip91
FBgn0001624	-0.033119	0.710389	0.830072	protein_coding	dlg1
FBgn0001941	0.336596	0.000125967	0.00125551	protein_coding	ifc
FBgn0001942	-0.734621	1.23845e-09	5.09509e-08	protein_coding	eIF4A
FBgn0001961	0.497254	3.24743e-06	5.37725e-05	protein_coding	Arpc1
FBgn0001965	0.0574586	0.604808	0.75676	protein_coding	Sos
FBgn0001970	0.239042	0.250187	0.444116	protein_coding	Pgant35A
FBgn0001977	0.282651	0.0204093	0.0737056	protein_coding	CIAPIN1
FBgn0001978	-0.172087	0.142444	0.303623	protein_coding	stc
FBgn0001981	0.365159	0.0505219	0.146141	protein_coding	esg
FBgn0001986	-0.605059	1.28713e-05	0.000174464	protein_coding	Mtr4
FBgn0001987	0.406653	0.00120111	0.00786044	protein_coding	Gli
FBgn0001989	-0.181543	0.122147	0.273295	protein_coding	ND-B17
FBgn0001990	-0.0182856	0.918698	0.956307	protein_coding	wek
FBgn0001991	0.214474	0.253593	0.447187	protein_coding	Ca-alpha1D
FBgn0001992	0.0615761	0.760622	0.8627	protein_coding	Cyp303a1
FBgn0001994	0.071077	0.429312	0.621931	protein_coding	crp
FBgn0001995	-0.214333	0.0497603	0.1445	protein_coding	mRpL4
FBgn0002021	0.0764495	0.476843	0.660228	protein_coding	l(2)37Bb
FBgn0002022	-0.422104	0.000210922	0.00188137	protein_coding	Catsup
FBgn0002023	-0.373923	0.146631	0.308828	protein_coding	Lim3
FBgn0002031	-0.0981363	0.212281	0.39874	protein_coding	l(2)37Cc
FBgn0002036	-0.134068	0.344101	0.540457	protein_coding	CG10561
FBgn0002044	0.0611818	0.590313	0.747617	protein_coding	swm
FBgn0002069	0.13675	0.0980966	0.235259	protein_coding	AspRS
FBgn0002121	0.191368	0.0921209	0.224919	protein_coding	l(2)gl
FBgn0002174	-0.0914356	0.33062	0.526829	protein_coding	CG5504
FBgn0002183	-0.103534	0.29468	0.491681	protein_coding	dre4
FBgn0002283	0.153035	0.325526	0.522173	protein_coding	l(3)73Ah
FBgn0002284	0.232593	0.0147418	0.0575475	protein_coding	Prosbeta6
FBgn0002306	-0.683431	0.0160004	0.061417	protein_coding	sas
FBgn0002354	-0.07971	0.602607	0.755504	protein_coding	l(3)87Df
FBgn0002413	0.0615238	0.3874	0.583881	protein_coding	dco
FBgn0002431	-0.0724652	0.310573	0.50778	protein_coding	hyd
FBgn0002441	0.0122549	0.912543	0.953377	protein_coding	l(3)mbt
FBgn0002466	1.32919	9.20329e-06	0.000129833	protein_coding	sti
FBgn0002521	0.119105	0.264995	0.459657	protein_coding	pho
FBgn0002522	-0.216362	0.143584	0.305103	protein_coding	lab
FBgn0002524	-0.117992	0.495079	0.674183	protein_coding	lace
FBgn0002525	0.189719	0.191157	0.371765	protein_coding	Lam
FBgn0002526	0.797208	1.10002e-09	4.60675e-08	protein_coding	LanA
FBgn0002542	0.447859	0.00600663	0.0289602	protein_coding	lds
FBgn0002543	0.465575	0.001397	0.00882889	protein_coding	robo2
FBgn0002552	-0.287254	0.0476797	0.139893	protein_coding	lin
FBgn0002564	0.384072	0.238139	0.42992	protein_coding	Lsp1gamma
FBgn0002565	-0.217879	0.44771	0.636111	protein_coding	Lsp2
FBgn0002566	0.0140188	0.886116	0.93656	protein_coding	lt
FBgn0002567	-0.702267	0.000658369	0.00479977	protein_coding	Rab32
FBgn0002569	0.848439	9.95329e-07	1.92451e-05	protein_coding	Mal-A2
FBgn0002570	0.818293	4.60182e-05	0.000531886	protein_coding	Mal-A1
FBgn0002571	1.45513	1.67657e-07	3.96391e-06	protein_coding	Mal-A3
FBgn0002578	-0.658879	0.00101916	0.00688705	protein_coding	Kaz-m1
FBgn0002579	-0.714711	6.43446e-14	7.90676e-12	protein_coding	RpL36
FBgn0002590	-0.752611	8.29254e-09	2.68903e-07	protein_coding	RpS5a
FBgn0002593	-0.775409	1.03837e-09	4.38793e-08	protein_coding	RpLP1
FBgn0002609	0.39328	0.1337	0.291509	protein_coding	E(spl)m3-HLH
FBgn0002622	-0.642704	5.12709e-09	1.81371e-07	protein_coding	RpS3
FBgn0002626	-0.674196	2.15617e-08	6.51667e-07	protein_coding	RpL32
FBgn0002638	-0.00193557	0.988144	0.993142	protein_coding	Rcc1
FBgn0002641	0.886307	5.39355e-06	8.21702e-05	protein_coding	mal
FBgn0002643	-0.121422	0.468052	0.652408	protein_coding	mam
FBgn0002645	0.207856	8.42722e-05	0.000890062	protein_coding	Map205
FBgn0002673	0.464758	0.137194	0.296277	protein_coding	twe
FBgn0002707	0.207915	0.197551	0.379616	protein_coding	mei-9
FBgn0002709	0.204826	0.340478	0.536753	protein_coding	mei-218
FBgn0002715	0.182366	0.518029	0.691915	protein_coding	mei-S332
FBgn0002716	0.119974	0.728328	0.842648	protein_coding	mei-W68
FBgn0002719	0.693684	0.000127784	0.00127024	protein_coding	Men
FBgn0002723	-0.156017	0.314288	0.511504	protein_coding	Met
FBgn0002732	0.598602	0.0112318	0.0470163	protein_coding	E(spl)malpha-BFM
FBgn0002733	0.290366	0.229975	0.419727	protein_coding	E(spl)mbeta-HLH
FBgn0002736	0.368628	0.00388633	0.020413	protein_coding	mago
FBgn0002772	-0.139269	0.444168	0.633489	protein_coding	Mlc1
FBgn0002773	-0.259203	0.124916	0.277549	protein_coding	Mlc2
FBgn0002774	-0.00508194	0.971429	0.984287	protein_coding	mle
FBgn0002775	-0.257163	0.0851055	0.212031	protein_coding	msl-3
FBgn0002778	0.683274	0.0283653	0.0946931	protein_coding	mnd
FBgn0002780	-0.450677	0.0004518	0.00353973	protein_coding	mod
FBgn0002781	0.0979917	0.423472	0.616014	protein_coding	mod(mdg4)
FBgn0002783	0.0370195	0.708716	0.828762	protein_coding	mor
FBgn0002787	0.144407	0.10263	0.243829	protein_coding	Rpn8
FBgn0002789	0.300328	0.154724	0.321748	protein_coding	Mp20
FBgn0002791	0.115743	0.463172	0.648853	protein_coding	mr
FBgn0002868	-0.973665	0.000343736	0.00279143	protein_coding	MtnA
FBgn0002869	-0.0634976	0.77889	0.87397	protein_coding	MtnB
FBgn0002872	0.229626	0.252182	0.446385	protein_coding	mu2
FBgn0002873	0.770073	0.00480135	0.0242509	protein_coding	mud
FBgn0002878	0.303928	0.192442	0.373424	protein_coding	mus101
FBgn0002887	0.303557	0.119668	0.269232	protein_coding	mus201
FBgn0002891	0.341895	0.0257888	0.0874832	protein_coding	DNApol-zeta
FBgn0002899	0.532823	0.0392185	0.120958	protein_coding	mus301
FBgn0002901	0.0720241	0.709915	0.829822	protein_coding	mus304
FBgn0002905	-0.0990244	0.685811	0.81374	protein_coding	DNApol-theta
FBgn0002906	0.31858	0.216069	0.40317	protein_coding	Blm
FBgn0002909	-0.243345	0.0723747	0.188796	protein_coding	mus312
FBgn0002914	-0.209501	0.0487932	0.142421	protein_coding	Myb
FBgn0002921	0.302939	0.179052	0.35654	protein_coding	Atpalpha
FBgn0002922	-0.784643	0.0168366	0.063607	protein_coding	nau
FBgn0002924	0.320116	0.126668	0.280054	protein_coding	ncd
FBgn0002930	-0.268818	0.406576	0.601745	protein_coding	nec
FBgn0002931	-1.07243	0.00119328	0.00783137	protein_coding	net
FBgn0002932	0.171779	0.2968	0.494173	protein_coding	neur
FBgn0002939	-2.14265	3.24243e-15	5.40733e-13	protein_coding	ninaD
FBgn0002940	-1.1444	0.00595989	0.0288436	protein_coding	ninaE
FBgn0002945	-0.347281	0.173526	0.348658	protein_coding	nkd
FBgn0002948	-0.0528022	0.88179	0.934737	protein_coding	nod
FBgn0002973	0.246284	0.126599	0.280034	protein_coding	numb
FBgn0002985	-0.508794	0.0757499	0.19489	protein_coding	odd
FBgn0002989	0.0331923	0.849753	0.917439	protein_coding	okr
FBgn0003008	0.413694	0.00290256	0.0160968	protein_coding	or
FBgn0003015	-0.407351	0.305042	0.502009	protein_coding	osk
FBgn0003016	-0.211305	0.183741	0.36171	protein_coding	osp
FBgn0003023	0.237567	0.4775	0.660574	protein_coding	otu
FBgn0003028	-0.260241	0.466551	0.651238	protein_coding	ovo
FBgn0003041	0.857911	4.02805e-06	6.43042e-05	protein_coding	pbl
FBgn0003042	0.151476	0.44276	0.632524	protein_coding	Pc
FBgn0003044	0.0988032	0.53666	0.707164	protein_coding	Pcl
FBgn0003046	-0.156983	0.492029	0.671204	protein_coding	Pcp
FBgn0003048	0.340504	0.0112373	0.0470184	protein_coding	pcx
FBgn0003053	0.149026	0.146954	0.30931	protein_coding	peb
FBgn0003062	-0.455765	0.000187109	0.00171483	protein_coding	Fib
FBgn0003067	-0.41724	0.198517	0.381079	protein_coding	Pepck1
FBgn0003068	0.00333556	0.9861	0.992583	protein_coding	per
FBgn0003071	-0.224091	0.113034	0.259871	protein_coding	Pfk
FBgn0003074	-0.375307	0.0149183	0.0581236	protein_coding	Pgi
FBgn0003076	0.470809	0.0837731	0.209972	protein_coding	Pgm1
FBgn0003079	-0.0962373	0.451342	0.639424	protein_coding	Raf
FBgn0003082	0.305759	0.112417	0.259096	protein_coding	phr
FBgn0003090	-0.394692	0.131225	0.287882	protein_coding	pk
FBgn0003091	-0.104435	0.746331	0.852565	protein_coding	Pkc53E
FBgn0003093	0.190163	0.159504	0.328325	protein_coding	Pkc98E
FBgn0003116	0.189859	0.171501	0.345577	protein_coding	pn
FBgn0003118	0.108093	0.458006	0.644888	protein_coding	pnt
FBgn0003124	0.753837	0.0106182	0.0450332	protein_coding	polo
FBgn0003130	0.32037	0.359349	0.556543	protein_coding	Poxn
FBgn0003134	0.0183122	0.89294	0.940766	protein_coding	Pp1alpha-96A
FBgn0003137	0.117814	0.503357	0.680642	protein_coding	Ppn
FBgn0003139	-0.212806	0.0088209	0.0389496	protein_coding	PpV
FBgn0003141	-0.0409048	0.688912	0.815741	protein_coding	pr
FBgn0003149	0.10183	0.666052	0.799109	protein_coding	Prm
FBgn0003159	-0.234171	0.0256512	0.0871747	protein_coding	CG2841
FBgn0003162	-0.952303	0.00120192	0.00786044	protein_coding	Pu
FBgn0003165	-0.190996	0.288147	0.484778	protein_coding	pum
FBgn0003169	-0.043525	0.718288	0.835936	protein_coding	put
FBgn0003175	-0.266156	0.0713819	0.186733	protein_coding	px
FBgn0003187	0.227069	0.503832	0.680733	protein_coding	qua
FBgn0003189	-0.644792	0.00713613	0.0329108	protein_coding	r
FBgn0003204	-0.196965	0.077274	0.197932	protein_coding	ras
FBgn0003205	0.370117	2.68962e-05	0.000327916	protein_coding	Ras85D
FBgn0003206	0.204382	0.170341	0.343811	protein_coding	Ras64B
FBgn0003209	-0.154577	0.4425	0.632524	protein_coding	raw
FBgn0003210	0.0918335	0.488234	0.669351	protein_coding	rb
FBgn0003218	0.0846742	0.701061	0.823031	protein_coding	rdgB
FBgn0003227	0.0143029	0.963281	0.980488	protein_coding	rec
FBgn0003231	0.486562	8.32709e-06	0.000119091	protein_coding	ref(2)P
FBgn0003256	-0.0448732	0.729787	0.843402	protein_coding	rl
FBgn0003257	-0.262521	0.220946	0.40766	protein_coding	r-l
FBgn0003261	-0.409917	0.0037324	0.0197601	protein_coding	Rm62
FBgn0003268	0.445413	0.052089	0.149312	protein_coding	rod
FBgn0003274	-0.586153	2.93338e-07	6.47632e-06	protein_coding	RpLP2
FBgn0003275	-0.21405	0.18123	0.359415	protein_coding	RpII18
FBgn0003277	-0.285404	0.00140803	0.00887889	protein_coding	RpII215
FBgn0003278	-0.599823	0.00178839	0.0108453	protein_coding	RpI135
FBgn0003279	-0.978385	3.57645e-12	2.71548e-10	protein_coding	RpL4
FBgn0003301	-0.923865	9.47888e-05	0.000977077	protein_coding	rut
FBgn0003302	-0.179261	0.50562	0.681894	protein_coding	rux
FBgn0003308	0.278383	0.182857	0.361266	protein_coding	ry
FBgn0003310	0.0183859	0.876807	0.931782	protein_coding	S
FBgn0003317	0.0448167	0.727192	0.842272	protein_coding	sax
FBgn0003321	-0.478004	0.000123327	0.00123182	protein_coding	sbr
FBgn0003328	0.463259	0.000321565	0.00264124	NA	NA
FBgn0003330	-0.0962393	0.500119	0.678277	protein_coding	Sce
FBgn0003334	-0.206857	0.0418982	0.127289	protein_coding	Scm
FBgn0003345	0.138837	0.0422587	0.128051	protein_coding	sd
FBgn0003346	0.371046	0.00666602	0.0311893	protein_coding	RanGAP
FBgn0003353	0.226566	0.409556	0.603841	protein_coding	sei
FBgn0003356	-1.49399	1.56282e-06	2.85061e-05	protein_coding	Jon99Cii
FBgn0003357	-1.4752	1.94811e-05	0.000248919	protein_coding	Jon99Ciii
FBgn0003358	-0.760032	0.0340176	0.108649	protein_coding	Jon99Ci
FBgn0003360	-0.164301	0.17131	0.345469	protein_coding	sesB
FBgn0003366	-0.169349	0.652513	0.791406	protein_coding	sev
FBgn0003371	0.221943	0.0123779	0.0505895	protein_coding	sgg
FBgn0003380	0.148275	0.641421	0.782985	protein_coding	Sh
FBgn0003386	-0.142234	0.515162	0.689763	protein_coding	Shaw
FBgn0003388	0.0327937	0.926784	0.960839	protein_coding	shd
FBgn0003390	-0.62826	0.00161819	0.00998826	protein_coding	shf
FBgn0003391	0.359975	0.000490159	0.00378001	protein_coding	shg
FBgn0003392	0.077219	0.2425	0.434947	protein_coding	shi
FBgn0003396	0.0814336	0.576206	0.737351	protein_coding	shn
FBgn0003401	0.917881	0.00772677	0.0350974	protein_coding	shu
FBgn0003410	0.137747	0.289325	0.48571	protein_coding	sina
FBgn0003415	-0.115084	0.463935	0.649133	protein_coding	skd
FBgn0003416	0.0334076	0.71931	0.836464	protein_coding	sl
FBgn0003423	-0.293754	0.439366	0.630685	protein_coding	slgA
FBgn0003429	-1.67714	2.61452e-11	1.70748e-09	protein_coding	slo
FBgn0003435	-0.0580495	0.744228	0.851582	protein_coding	sm
FBgn0003444	-0.615508	0.00124033	0.00807212	protein_coding	smo
FBgn0003447	0.249989	0.207319	0.391933	protein_coding	sn
FBgn0003449	-0.0509553	0.629676	0.773973	protein_coding	snf
FBgn0003459	-0.0841171	0.573085	0.735473	protein_coding	stwl
FBgn0003460	-0.0228486	0.950225	0.974588	protein_coding	so
FBgn0003462	-0.366661	2.80841e-06	4.74281e-05	protein_coding	Sod1
FBgn0003463	-0.0770289	0.671445	0.80308	protein_coding	sog
FBgn0003464	-0.0389688	0.700505	0.822843	protein_coding	sol
FBgn0003475	-0.210112	0.0113849	0.0474658	protein_coding	spir
FBgn0003479	0.176046	0.414117	0.608102	protein_coding	spn-A
FBgn0003480	-0.145844	0.640184	0.781731	protein_coding	spn-B
FBgn0003483	0.67689	0.023863	0.0827849	protein_coding	spn-E
FBgn0003495	-0.575176	0.0621565	0.169378	protein_coding	spz
FBgn0003499	-0.214256	0.546814	0.715725	protein_coding	sr
FBgn0003502	-0.253644	0.0689982	0.182129	protein_coding	Btk29A
FBgn0003507	-0.602816	0.00588816	0.028566	protein_coding	srp
FBgn0003510	0.398322	0.249396	0.443134	protein_coding	Sry-alpha
FBgn0003511	-0.0460594	0.80932	0.89246	protein_coding	Sry-beta
FBgn0003512	-0.00626525	0.95622	0.97763	protein_coding	Sry-delta
FBgn0003514	0.475977	1.05604e-05	0.000147419	protein_coding	sqh
FBgn0003515	0.544322	0.0629914	0.170663	protein_coding	st
FBgn0003517	-1.00927	5.44747e-12	3.97452e-10	protein_coding	sta
FBgn0003520	-0.108827	0.356836	0.553598	protein_coding	stau
FBgn0003525	0.212639	0.557048	0.723094	protein_coding	stg
FBgn0003545	0.927279	0.00556447	0.0272647	protein_coding	sub
FBgn0003557	-0.00610147	0.958079	0.978212	protein_coding	Su(dx)
FBgn0003559	0.0490722	0.660495	0.796535	protein_coding	su(f)
FBgn0003567	0.214761	0.163608	0.334268	protein_coding	su(Hw)
FBgn0003575	0.0412123	0.711924	0.830771	protein_coding	su(sable)
FBgn0003598	0.0944458	0.496171	0.675078	protein_coding	Su(var)3-7
FBgn0003607	-0.108899	0.171868	0.346071	protein_coding	Su(var)205
FBgn0003612	0.0609729	0.615955	0.765096	protein_coding	Su(var)2-10
FBgn0003638	-0.393082	0.000432585	0.00342075	protein_coding	su(w[a])
FBgn0003651	-0.256039	0.470987	0.654838	protein_coding	svp
FBgn0003654	0.362089	1.68225e-05	0.000220036	protein_coding	sw
FBgn0003655	-0.552575	0.123748	0.275556	protein_coding	swa
FBgn0003656	0.556031	0.000353096	0.0028642	protein_coding	sws
FBgn0003660	0.440077	3.36148e-06	5.52794e-05	protein_coding	Syb
FBgn0003676	0.129125	0.106562	0.250105	protein_coding	CCT1
FBgn0003687	0.10281	0.530875	0.702011	protein_coding	Tbp
FBgn0003701	0.59159	0.0662887	0.177029	protein_coding	thr
FBgn0003714	-0.0794676	0.531564	0.702459	protein_coding	tko
FBgn0003716	-0.254012	0.0372898	0.116355	protein_coding	tkv
FBgn0003721	0.302656	0.00104435	0.00702676	protein_coding	Tm1
FBgn0003731	0.0752534	0.637045	0.779675	protein_coding	Egfr
FBgn0003741	0.10874	0.614362	0.763985	protein_coding	tra
FBgn0003742	0.0230556	0.86322	0.923765	protein_coding	tra2
FBgn0003744	0.250184	0.0011482	0.00759748	protein_coding	trc
FBgn0003748	0.172027	0.311862	0.509264	protein_coding	Treh
FBgn0003862	-0.305418	0.0131125	0.0527835	protein_coding	trx
FBgn0003866	0.0141554	0.949161	0.974197	protein_coding	tsh
FBgn0003867	-0.209748	0.478717	0.660766	protein_coding	tsl
FBgn0003870	-0.0416324	0.727024	0.842182	protein_coding	ttk
FBgn0003882	-0.0739788	0.590908	0.748149	protein_coding	tub
FBgn0003884	0.427713	0.000167861	0.00158349	protein_coding	alphaTub84B
FBgn0003885	0.131981	0.144663	0.306224	protein_coding	alphaTub84D
FBgn0003888	1.39191	2.179e-09	8.55028e-08	protein_coding	betaTub60D
FBgn0003890	-0.205739	0.0568745	0.159314	protein_coding	betaTub97EF
FBgn0003891	-0.440691	0.000440753	0.00347065	protein_coding	tud
FBgn0003892	-0.470032	0.029586	0.0975647	protein_coding	ptc
FBgn0003896	-0.395462	0.166602	0.338725	protein_coding	tup
FBgn0003941	-0.706846	8.48261e-09	2.7144e-07	protein_coding	RpL40
FBgn0003942	-0.665489	4.26094e-10	2.03025e-08	protein_coding	RpS27A
FBgn0003943	0.494953	0.000159893	0.00152279	protein_coding	Ubi-p63E
FBgn0003944	-0.51515	0.106766	0.250357	protein_coding	Ubx
FBgn0003961	0.260331	0.11773	0.266158	protein_coding	Uro
FBgn0003963	-0.175262	0.363948	0.561617	protein_coding	ush
FBgn0003964	-0.0584404	0.583968	0.743547	protein_coding	usp
FBgn0003969	0.585915	0.000188301	0.001719	protein_coding	vap
FBgn0003977	0.00171223	0.988605	0.993392	protein_coding	vir
FBgn0003978	0.134202	0.499231	0.677494	protein_coding	vls
FBgn0003984	0.84622	0.00518274	0.0257676	protein_coding	vn
FBgn0003996	0.587253	0.000289197	0.00243316	protein_coding	w
FBgn0003997	-0.0363509	0.840964	0.911482	protein_coding	hid
FBgn0004003	-0.086681	0.798937	0.886031	protein_coding	wbl
FBgn0004045	0.475664	0.219461	0.406252	protein_coding	Yp1
FBgn0004047	0.276067	0.448999	0.637071	protein_coding	Yp3
FBgn0004049	0.206957	0.0431824	0.129923	protein_coding	yrt
FBgn0004050	0.192685	0.130128	0.286012	protein_coding	z
FBgn0004055	-0.332087	0.099809	0.238515	protein_coding	uzip
FBgn0004057	-0.407349	0.029387	0.0971142	protein_coding	Zw
FBgn0004066	0.316271	0.00977297	0.0422741	protein_coding	Prosalpha4
FBgn0004087	-0.247749	0.162643	0.333045	protein_coding	Dhfr
FBgn0004101	0.106168	0.461399	0.647854	protein_coding	bs
FBgn0004103	0.0951542	0.155312	0.322467	protein_coding	Pp1-87B
FBgn0004106	0.710614	0.0340585	0.108737	protein_coding	Cdk1
FBgn0004107	0.138806	0.618849	0.76691	protein_coding	Cdk2
FBgn0004108	-0.214274	0.3803	0.57675	protein_coding	Nrt
FBgn0004117	-0.111207	0.601257	0.754729	protein_coding	Tm2
FBgn0004132	0.363412	0.00324382	0.0175822	protein_coding	boca
FBgn0004133	-0.410428	0.270647	0.465329	protein_coding	blow
FBgn0004167	0.042718	0.772891	0.869187	protein_coding	kst
FBgn0004168	-0.432294	0.223922	0.411569	protein_coding	5-HT1A
FBgn0004169	0.0450456	0.828274	0.904272	protein_coding	up
FBgn0004170	1.35459	9.92005e-06	0.000139104	protein_coding	sc
FBgn0004177	0.0917114	0.0611884	0.167577	protein_coding	mts
FBgn0004179	0.0872776	0.331482	0.527763	protein_coding	Csp
FBgn0004197	-0.562084	0.00666398	0.0311893	protein_coding	Ser
FBgn0004198	0.574621	0.0785829	0.200078	protein_coding	ct
FBgn0004227	-0.0418432	0.637634	0.779738	protein_coding	nonA
FBgn0004228	0.559356	0.000951751	0.00650688	protein_coding	mex1
FBgn0004237	0.151476	0.202878	0.386353	protein_coding	Hrb87F
FBgn0004240	1.69998	1.67614e-09	6.7472e-08	protein_coding	DptA
FBgn0004242	0.050816	0.848376	0.916588	protein_coding	Syt1
FBgn0004359	0.159324	0.628315	0.77361	protein_coding	T48
FBgn0004362	0.535952	3.46206e-05	0.000409787	protein_coding	HmgD
FBgn0004363	0.158604	0.0657922	0.176207	protein_coding	porin
FBgn0004364	-0.58611	0.000487866	0.00376856	protein_coding	18w
FBgn0004367	-0.24946	0.256862	0.451248	protein_coding	mei-41
FBgn0004368	0.0681653	0.731109	0.843583	protein_coding	Ptp4E
FBgn0004369	-0.58821	8.68957e-05	0.000911223	protein_coding	Ptp99A
FBgn0004370	-0.592321	0.036106	0.113903	protein_coding	Ptp10D
FBgn0004373	-0.0137472	0.931502	0.963698	protein_coding	fwd
FBgn0004374	0.200516	0.369106	0.566024	protein_coding	neb
FBgn0004378	0.68914	0.0103931	0.0444688	protein_coding	Klp61F
FBgn0004379	0.480882	0.113931	0.260785	protein_coding	Klp67A
FBgn0004380	0.218436	0.0787284	0.200285	protein_coding	Klp64D
FBgn0004381	0.772656	1.43842e-06	2.64958e-05	protein_coding	Klp68D
FBgn0004387	-0.0596724	0.713207	0.831852	protein_coding	Klp98A
FBgn0004390	0.17357	0.37621	0.573246	protein_coding	RasGAP1
FBgn0004391	0.230762	0.117439	0.265947	protein_coding	shtd
FBgn0004394	0.381198	0.0440625	0.131933	protein_coding	pdm2
FBgn0004395	0.0740888	0.540045	0.710249	protein_coding	unk
FBgn0004396	-0.466543	0.000178054	0.00165308	protein_coding	CrebA
FBgn0004397	0.523631	4.98608e-05	0.000566484	protein_coding	Vinc
FBgn0004401	-0.0435215	0.647487	0.787649	protein_coding	Pep
FBgn0004403	-0.65902	7.10355e-07	1.43283e-05	protein_coding	RpS14a
FBgn0004404	-0.70982	1.59277e-10	8.50324e-09	protein_coding	RpS14b
FBgn0004406	0.216829	0.202876	0.386353	protein_coding	tam
FBgn0004407	0.185202	0.20424	0.387919	protein_coding	DNApol-gamma35
FBgn0004419	0.170285	0.0673553	0.178952	protein_coding	me31B
FBgn0004425	-0.0292339	0.933002	0.964525	protein_coding	LysB
FBgn0004426	0.573426	0.123408	0.275061	pseudogene	LysC
FBgn0004427	-0.137886	0.606028	0.757758	protein_coding	LysD
FBgn0004428	-1.47478	0.000177643	0.00165308	protein_coding	LysE
FBgn0004429	0.784883	0.000488308	0.00376885	protein_coding	LysP
FBgn0004431	0.376913	0.25344	0.447002	protein_coding	LysX
FBgn0004432	0.0868742	0.33119	0.527543	protein_coding	Cyp1
FBgn0004435	0.221659	0.00226189	0.0131624	protein_coding	Galphaq
FBgn0004436	0.240318	0.000780127	0.00553618	protein_coding	Ubc6
FBgn0004449	-0.0467523	0.785404	0.877484	protein_coding	Ten-m
FBgn0004456	0.516262	1.97623e-06	3.48885e-05	protein_coding	mew
FBgn0004463	-0.337819	0.01269	0.0515941	protein_coding	RpIII128
FBgn0004465	-0.123907	0.0985896	0.235963	protein_coding	Su(P)
FBgn0004507	-0.372923	0.0531927	0.151638	protein_coding	GlyP
FBgn0004509	0.227736	0.0368522	0.115402	protein_coding	Fur1
FBgn0004510	0.265935	0.205037	0.38887	protein_coding	Ets97D
FBgn0004512	-0.397755	0.0977135	0.234528	protein_coding	Mdr49
FBgn0004513	0.608978	0.0784196	0.200078	protein_coding	Mdr65
FBgn0004516	0.0680721	0.86108	0.922839	protein_coding	Gad1
FBgn0004552	-2.69743	1.17153e-11	8.16484e-10	protein_coding	Akh
FBgn0004556	-0.1167	0.526582	0.698246	protein_coding	Dbp73D
FBgn0004569	0.0287589	0.900802	0.945659	protein_coding	aos
FBgn0004573	-1.53565	1.89124e-06	3.36425e-05	protein_coding	5-HT7
FBgn0004574	0.308185	0.00666313	0.0311893	protein_coding	Rop
FBgn0004575	-0.366392	0.142508	0.303623	protein_coding	Syn
FBgn0004580	0.514339	0.0400206	0.122783	protein_coding	Cbp53E
FBgn0004583	-0.111066	0.426336	0.618927	protein_coding	ex
FBgn0004584	0.712819	0.00151457	0.00945386	protein_coding	Rrp1
FBgn0004587	-0.181803	0.0335317	0.107502	protein_coding	B52
FBgn0004595	0.448915	0.0102525	0.044002	protein_coding	pros
FBgn0004597	0.374292	0.00195945	0.0116854	protein_coding	CycC
FBgn0004598	-0.0854131	0.656655	0.793851	protein_coding	Fur2
FBgn0004606	-0.987941	0.00765654	0.0348632	protein_coding	zfh1
FBgn0004607	0.19663	0.537038	0.70749	protein_coding	zfh2
FBgn0004611	0.0658135	0.727343	0.842344	protein_coding	Plc21C
FBgn0004620	-0.0883821	0.790697	0.879773	protein_coding	GluRIIA
FBgn0004622	-0.313876	0.303951	0.501431	protein_coding	TkR99D
FBgn0004629	-0.10431	0.503479	0.680642	protein_coding	Cys
FBgn0004635	1.45208	2.28918e-06	3.95901e-05	protein_coding	rho
FBgn0004636	0.0549053	0.463373	0.648938	protein_coding	Rap1
FBgn0004638	0.103765	0.366257	0.563811	protein_coding	drk
FBgn0004643	0.0379124	0.752416	0.856824	protein_coding	Zw10
FBgn0004644	0.047447	0.864468	0.924738	protein_coding	hh
FBgn0004646	-0.508829	0.0242443	0.0837344	protein_coding	ogre
FBgn0004647	0.691289	0.000117073	0.00117564	protein_coding	N
FBgn0004648	0.198787	0.0228877	0.0801978	protein_coding	svr
FBgn0004649	-0.151693	0.688456	0.815408	protein_coding	yl
FBgn0004652	-0.403065	0.0240117	0.0831154	protein_coding	fru
FBgn0004654	-0.223269	0.0366649	0.114981	protein_coding	Pgd
[truncated: 8,717 more rows]

## Sheet: OKSM vs. Senolytic
gene_id	log2FoldChange	pvalue	padj	gene_biotype	external_gene_name
[truncated: 9,339 more rows]

[truncated: 16 more sheets: OKSM vs. Senolytic_OKSM, Senolytic vs. Senolytic_OKSM, C1 GO, C1 KEGG, C2 GO, C2 KEGG, C3 GO, C3 KEGG, C4 GO, C4 KEGG, C5 GO, C5 KEGG, C6 GO, C6 KEGG, C7 GO, C7 KEGG]
